# Supplementary material for: Single-Cell Multi-Modal Differential Analysis of the Human Neo-Cortex in HIV Infection Reveals Similarities with Hallmarks of Alzheimer’s Disease
Source: Research Square preprint supplement (doi:10.21203/rs.3.rs-7636879/v1), 2025-11-01
Supplement: Supplementary file 1 [file 0331a3cd3f86f789f95aabee.xlsx]

## Sheet: Sheet1
	Term	ES	NES	NOM p-val	FDR q-val	FWER p-val	Tag %	Gene %	Lead_genes	cell_type
0	MSigDB_Hallmark_2020__Interferon Gamma Response	0.462748	4.85544	0	0	0	132/196	26.74%	SOCS3;IL15;CFB;PIM1;NLRC5;IFI44L;SOCS1;OASL;ZBP1;METTL7B;IL4R;PLSCR1;GZMA;IFI30;HELZ2;IFI44;FPR1;IFITM2;LAP3;CD38;CDKN1A;CCL5;BATF2;USP18;PTGS2;MX2;IFI27;ISG20;IFITM3;TRIM25;APOL6;IL7;SECTM1;GPR18;FCGR1A;C1R;EPSTI1;PTPN2;STAT4;OAS3;SELP;TRIM14;MYD88;HIF1A;IFI35;IFIT3;SLAMF7;NAMPT;OAS2;TAP1;IRF4;SP110;LGALS3BP;PSMB9;TNFAIP6;TRIM21;TNFAIP3;CMPK2;RTP4;HLA-DQA1;ISG15;MX1;MT2A;BST2;PARP14;LY6E;GBP6;DH…	ImmuneCells
1	MSigDB_Hallmark_2020__Interferon Alpha Response	0.498587	4.39842	0	0	0	70/97	28.26%	IL15;GBP2;IFI44L;OASL;IL4R;PLSCR1;IFI30;HELZ2;IFI44;IFITM2;LAP3;PARP9;CCRL2;BATF2;USP18;IFI27;ISG20;IFITM3;TRIM25;IL7;GMPR;EPSTI1;TRIM14;IFI35;IFIT3;TAP1;SP110;LGALS3BP;PSMB9;TRIM21;CMPK2;RTP4;ISG15;MX1;BST2;PARP14;LY6E;TMEM140;DHX58;RSAD2;IFIT2;PARP12;IRF7;DDX60;HLA-C;TENT5A;RNF31;HERC6;IRF1;WARS1;PSMB8;TXNIP;PSME2;CASP1;B2M;GBP4;MVB12A;STAT2;SAMD9L;C1S;IFIH1;NMI;IRF9;UBE2L6;EIF2AK2;OGFR;SAMD9;P…	ImmuneCells
2	WikiPathway_2023_Human__Electron Transport Chain OXPHOS System In Mitochondria WP111	-0.461475	-3.52744	0	0	0	78/91	44.41%	NDUFA7;COX7A1;SURF1;COX8A;ATP5IF1;NDUFA4;NDUFB5;SLC25A4;ATP5MC1;ATP5MC3;ATP5PF;NDUFAB1;COX5A;NDUFB10;NDUFB2;COX6A1;COX5B;NDUFC2;NDUFA13;ATP5F1D;NDUFA2;UQCRB;NDUFA1;NDUFB7;UQCR11;COX7A2;ATP5MF;COX6B1;NDUFB8;COX7C;ATP5PO;UQCRFS1;NDUFV2;NDUFA11;SLC25A5;NDUFA6;NDUFA8;UQCRQ;COX6C;COX4I1;NDUFA3;UQCRC1;UQCR10;UQCRH;NDUFS3;NDUFB3;NDUFB1;NDUFS5;COX6A2;SLC25A6;ATP5PD;NDUFS8;ATP5F1E;ATP5ME;ATP5F1B;NDUFB4;SL…	ImmuneCells
3	GO_Biological_Process_2023__Chemical Synaptic Transmission (GO:0007268)	-0.348554	-3.43106	0	0	0	138/257	25.34%	SST;CRH;CHRNA4;CBLN1;MYCBPAP;CHRNB2;CORT;PCDHB11;CDK5;DRD5;SLC32A1;SYT5;HTR3B;NPTX2;PCDHB3;HTR1A;PCDHB13;PDLIM4;PNOC;CHRM4;SCN2B;DRD4;KCNK3;PCDHB2;SLC1A6;GRIN1;GRIN2C;GABRD;PCDHB10;UNC13A;GABRA6;GLRA3;GRIN2B;OPRK1;SNCB;HTR3E;SYT10;GAD2;CPLX1;HTR2A;GABRG3;PCDHB9;GLRB;GABRA1;KIF5A;UNC13C;GABRA4;GABBR1;PTCHD1;GRIK3;CHRM2;HTR1F;SYN2;SLC17A6;SLC6A9;GRIN2A;DLG3;SYN1;SNAP25;GAD1;KCNN1;CHRFAM7A;RIT2;HTR2…	ImmuneCells
4	GO_Biological_Process_2023__Aerobic Electron Transport Chain (GO:0019646)	-0.483447	-3.34226	0	0	0	57/66	42.64%	NDUFA7;COX8A;NDUFA4;NDUFB5;SDHAF2;NDUFAB1;COX5A;CYCS;NDUFB10;NDUFB2;COX6A1;COX5B;NDUFC2;NDUFA2;UQCRB;CYC1;NDUFA1;NDUFB7;UQCR11;UQCRHL;COX7A2;COX6B1;NDUFB8;UQCC3;COX7C;UQCRFS1;NDUFV2;SLC25A51;NDUFA6;NDUFA8;UQCRQ;COX6C;COX4I1;NDUFA3;UQCRC1;UQCR10;UQCRH;NDUFS3;NDUFB3;NDUFB1;NDUFS5;COX6A2;NDUFS8;NDUFB4;NDUFS7;NDUFC1;COX7B;NDUFA5;SDHA;NDUFAF1;NDUFA9;NDUFS2;NDUFB9;NDUFV1;COX15;NDUFB6;NDUFS6	ImmuneCells
5	GO_Biological_Process_2023__Mitochondrial ATP Synthesis Coupled Electron Transport (GO:0042775)	-0.47175	-3.30576	0	0	0	58/68	42.64%	NDUFA7;COX8A;NDUFA4;NDUFB5;SDHAF2;NDUFAB1;COX5A;CYCS;NDUFB10;NDUFB2;COX6A1;COX5B;NDUFC2;NDUFA2;COA6;UQCRB;CYC1;NDUFA1;NDUFB7;UQCR11;UQCRHL;COX7A2;COX6B1;NDUFB8;UQCC3;COX7C;UQCRFS1;NDUFV2;NDUFA6;NDUFA8;UQCRQ;COX6C;COX4I1;NDUFA3;UQCRC1;UQCR10;UQCRH;NDUFS3;NDUFB3;NDUFB1;NDUFS5;COX6A2;NDUFS8;NDUFB4;NDUFS7;NDUFC1;COX7B;NDUFA5;SDHA;NDUFA12;NDUFAF1;NDUFA9;NDUFS2;NDUFB9;NDUFV1;COX15;NDUFB6;NDUFS6	ImmuneCells
6	GO_Biological_Process_2023__Anterograde Trans-Synaptic Signaling (GO:0098916)	-0.35611	-3.28639	0	0	0	104/189	25.78%	SST;CRH;CHRNA4;CBLN1;MYCBPAP;CHRNB2;CORT;PCDHB11;CDK5;DRD5;SYT5;HTR3B;NPTX2;PCDHB3;HTR1A;PCDHB13;PNOC;CHRM4;SCN2B;DRD4;KCNK3;PCDHB2;SLC1A6;GRIN1;GABRD;PCDHB10;GLRA3;GRIN2B;OPRK1;SNCB;HTR3E;SYT10;GAD2;CPLX1;HTR2A;PCDHB9;GLRB;KIF5A;UNC13C;PTCHD1;CHRM2;HTR1F;SYN2;GRIN2A;DLG3;SYN1;SNAP25;GAD1;KCNN1;RIT2;HTR2B;PDYN;HTR3C;HTR2C;SLC12A5;BSN;NPFF;GRIA1;KCNA1;NPTX1;CHRNA2;GRM3;PCDHB14;ZACN;GABBR2;NRXN2;CH…	ImmuneCells
7	KEGG_2021_Human__Ribosome	-0.38425	-3.24932	0	0	0	101/131	42.34%	RPL3L;MRPL12;RPL36A-HNRNPH2;MRPL10;MRPL27;MRPL28;RPL19;MRPL24;MRPL23;RPS5;UBA52;RPS15;MRPS17;RPL36AL;RPS27A;MRPL17;MRPL36;MRPL9;RPL18A;RPS26;MRPL34;RPL26L1;RPS27;MRPS15;RPL26;FAU;RPL10A;RPS10;RPLP1;RPS11;RPL41;RPL22L1;RPL24;RPS4X;RPS20;RPL23A;RPL39;RPS23;RPLP2;RPS7;RPL23;RPL13A;RPS12;RPS2;RPL7A;RPS6;MRPS7;RPL15;RPL27;RPS3A;RPL32;RPL28;RPS18;RPL29;MRPL11;RPL8;RPL14;RPL35;MRPL14;RPL3;MRPL2;RPS4Y1;R…	ImmuneCells
8	GO_Molecular_Function_2023__Oxidoreduction-Driven Active Transmembrane Transporter Activity (GO:0015453)	-0.492655	-3.16979	0	0	0	47/53	43.02%	NDUFA7;COX7A1;COX8A;NDUFA4;NDUFB5;COX5A;NDUFB10;NDUFB2;COX5B;NDUFC2;NDUFA2;UQCRB;NDUFA1;NDUFB7;UQCRHL;COX6B1;NDUFB8;COX7C;NDUFV2;NDUFA6;NDUFA8;COX4I1;NDUFA3;UQCRC1;UQCR10;UQCRH;NDUFS3;NDUFB3;NDUFB1;NDUFS5;NDUFS8;CYBRD1;NDUFB4;NDUFS7;NDUFC1;COX7B;CYB561A3;NDUFA5;NDUFA12;NDUFA9;NDUFS2;NDUFB9;NDUFV1;CYB5A;NDUFB6;NDUFS6;COX7A2L	ImmuneCells
9	KEGG_2021_Human__Systemic lupus erythematosus	0.377686	3.16441	0	0	0	52/87	25.50%	H2BC14;H3C10;H2BC3;H2AC7;FCGR3A;C7;FCGR2A;H2AC12;H2AC16;CD80;HLA-DOB;H2BC10;H2BC15;H2BC9;HLA-DQB1;H2BC12;H4C8;FCGR1A;H2AC17;C1R;IL10;H2AC11;H2BC4;H2BC8;H2BC11;SNRPD3;H2BC21;H2AC15;H2BC18;TRIM21;HLA-DQA1;H4C2;H3C1;H2BC7;H2BC5;H2AC6;C1QC;H2AC21;C1QA;C1QB;H2BC6;HLA-DOA;MACROH2A2;H2AJ;C5;HLA-DPB1;C1S;HLA-DRB1;ACTN4;HLA-DMA;MACROH2A1;CD86	ImmuneCells
10	MSigDB_Hallmark_2020__TNF-alpha Signaling via NF-kB	0.285169	3.14073	0	0	0	92/197	22.90%	SOCS3;TLR2;ACKR3;BCL2A1;BCL6;MAP3K8;BCL3;CXCL1;GADD45B;FOSL2;EDN1;CD80;LIF;SLC2A3;CXCL3;CD44;SLC2A6;TNFRSF9;CXCL2;NR4A3;CDKN1A;CCRL2;CCL5;PTGS2;BIRC3;SERPINE1;DUSP5;SDC4;ZFP36;YRDC;FOSL1;CEBPD;MYC;IL7R;KLF4;FOS;VEGFA;ZC3H12A;GEM;PTGER4;NAMPT;ATF3;TAP1;HBEGF;PER1;DUSP1;EHD1;PTX3;TNFAIP6;TNFAIP3;DUSP4;CCL20;IER5;CEBPB;EFNA1;PLPP3;F3;IL23A;SERPINB8;BHLHE40;LITAF;TGIF1;PLAUR;SIK1;NFIL3;IFIT2;CLCF1;RE…	ImmuneCells
11	MSigDB_Hallmark_2020__IL-6/JAK/STAT3 Signaling	0.3787	3.09674	0	0	0	44/77	25.22%	SOCS3;TLR2;IL1R2;PIM1;MAP3K8;SOCS1;CXCL1;IL4R;CD36;CXCL3;CD44;IL18R1;ITGA4;IL2RG;CD38;HMOX1;IL3RA;IL7;PTPN2;IL17RB;MYD88;IL1R1;OSMR;IL2RA;BAK1;CD14;ACVR1B;PTPN1;LTB;ITGB3;IL10RB;STAT1;FAS;IRF1;EBI3;IL15RA;STAT2;CSF2RB;LTBR;IL17RA;TNFRSF1B;STAT3;IRF9;TYK2	ImmuneCells
12	KEGG_2021_Human__Nicotine addiction	-0.518412	-3.07023	0	9.59353e-05	0.001	29/40	22.34%	CHRNA4;CHRNB2;SLC32A1;GRIN1;GRIN2C;GABRD;GABRA6;GRIN2B;GABRG3;GABRA1;GABRA4;SLC17A6;GRIN2A;GRIN3A;GABRG2;GRIA1;GABRA5;SLC17A7;GRIA4;GABRA3;GABRB3;GRIA3;GABRB2;GABRA2;GABRG1;GABRB1;SLC17A8;GRIA2;CHRNA6	ImmuneCells
13	WikiPathway_2023_Human__Oxidative Phosphorylation WP623	-0.481231	-3.06044	0	8.52758e-05	0.001	46/52	44.27%	NDUFA7;GZMB;NDUFA4L2;NDUFA4;NDUFB5;ATP5MC1;ATP5MC3;ATP5PF;NDUFAB1;NDUFB10;NDUFB2;NDUFC2;ATP5F1D;NDUFA2;NDUFB7;ATP5MF;NDUFB8;ATP5PO;NDUFV2;NDUFA11;NDUFA6;NDUFA8;NDUFA3;NDUFS3;NDUFB1;NDUFS5;ATP5PD;NDUFS8;ATP5F1E;ATP5ME;ATP5F1B;NDUFB4;NDUFS7;NDUFC1;NDUFA5;NDUFA9;ATP6AP2;NDUFS2;ATP5MG;NDUFB9;NDUFV1;NDUFB6;NDUFS6;DMAC2L;ATP5F1A;ATP5MC2	ImmuneCells
14	WikiPathway_2023_Human__Cytoplasmic Ribosomal Proteins WP477	-0.406827	-3.04835	0	7.67482e-05	0.001	69/88	40.57%	RPL3L;RPL19;RPS5;UBA52;RPS15;RPS27A;RPL18A;RPS26;RPS27;RPL26;FAU;RPL10A;RPS10;RPLP1;RPS11;RPL41;RPL24;RPS4X;RPS20;RPL23A;RPL39;RPS23;RPLP2;RPS7;RPL23;RPL13A;RPS12;RPS2;RPL7A;RPS6;RPL15;RPL27;RPS3A;RPL32;RPL28;RPS18;RPL29;RPL8;RPL14;RPL35;RPL3;RPS6KB2;RPS4Y1;RPL13;RPS14;RPS13;RPL11;RPS25;RPL38;RPS8;RPS16;RPL22;RPL7;RPL36;RPS21;RPL21;RPL6;RPL4;RPL18;RPS3;RPS6KA6;RPL10;RPL9;RPS15A;RPL34;RPS24;RPL30;…	ImmuneCells
15	GO_Biological_Process_2023__Oxidative Phosphorylation (GO:0006119)	-0.44361	-2.98592	0	6.97711e-05	0.001	48/60	42.64%	NDUFA7;NDUFB5;NDUFB11;ATP5PF;NDUFAB1;NDUFB10;NDUFB2;NDUFC2;NDUFA13;ATP5F1D;NDUFA2;CHCHD10;UQCRB;NDUFA1;NDUFB7;ATP5MF;NDUFB8;ATP5PO;NDUFV2;SLC25A51;NDUFA11;NDUFA6;NDUFA8;NDUFA3;UQCRC1;UQCRH;NDUFS3;NDUFB3;NDUFB1;NDUFS5;ATP5PD;NDUFS8;ATP5F1E;ATP5ME;ATP5F1B;NDUFB4;NDUFS7;NDUFC1;NDUFA5;SDHA;NDUFA12;NDUFA9;NDUFS2;ATP5MG;NDUFB9;NDUFV1;NDUFB6;NDUFS6	ImmuneCells
16	GO_Biological_Process_2023__Peptide Biosynthetic Process (GO:0043043)	-0.341161	-2.97974	0	6.39569e-05	0.001	104/149	40.85%	GSPT2;RPL3L;PCSK1;IGF2BP3;MRPL12;GGT5;MRPL51;CARNS1;MRPL10;EEF1A2;MRPL27;MRPL28;RPL19;MRPL24;MRPL23;RPS5;MRPS33;RPS15;MRPS17;RPL36AL;MRPL55;RPS27A;MRPL36;MRPL9;RPL18A;RPS26;MRPL34;RPS27;MRPS15;RPL26;DHPS;FAU;RPL10A;GGTA1;RPS10;RPLP1;RPS11;RPL41;RPL24;RPS4X;RPS20;RPL23A;RPL39;RPS23;RPLP2;RPS7;DMD;RPL13A;RPS2;RPL7A;RPS6;MRPS7;RPL15;RPL27;RPS3A;RPL32;RPL28;RPS18;RPL29;MRPL11;RPL8;RPL14;RPL35;MRPL14;…	ImmuneCells
17	GO_Biological_Process_2023__Cellular Respiration (GO:0045333)	-0.399854	-2.97733	0	5.90371e-05	0.001	65/84	42.64%	NDUFA7;SURF1;BLOC1S1;COX8A;NDUFA4;NDUFB5;NDUFB11;NDUFAB1;COX5A;CYCS;NDUFB10;NDUFB2;COX6A1;COX5B;NDUFC2;NDUFA13;NDUFA2;UQCRB;CYC1;NDUFA1;NDUFB7;UQCR11;COX7A2;COX6B1;NDUFB8;COX7C;UQCRFS1;NDUFV2;ETFB;NDUFA11;NDUFA6;NDUFA8;UQCRQ;MDH2;COX6C;COX4I1;NDUFA3;CHCHD5;UQCRC1;UQCR10;UQCRH;NDUFS3;NDUFB3;NDUFB1;NDUFS5;NDUFS8;NDUFB4;SLC25A14;NDUFS7;NDUFC1;COX7B;ME3;NDUFA5;SDHA;NDUFA12;SIRT3;MTLN;NDUFA9;NDUFS2;ND…	ImmuneCells
18	GO_Biological_Process_2023__Synapse Organization (GO:0050808)	-0.349864	-2.96608	0	5.48202e-05	0.001	79/130	31.45%	BDNF;CBLN1;F2R;PCDHB11;CDK5;WNT7B;PCDHB3;CX3CR1;PCDHB13;PCDHB2;PCDHB10;UNC13A;DNER;SNCB;PCDHB9;PTK7;NTNG1;UNC13C;SDK2;SEMA3E;CDH1;ANK3;L1CAM;ADGRF1;SLITRK2;DOK7;LRFN5;SHANK3;FLRT3;PTPRF;MAPT;DRD1;CX3CL1;TNC;PCDHB14;LRRC4B;DRD2;KY;NRXN2;SLC8A3;CDH2;SPOCK2;LRFN4;ELFN1;SHANK2;CACNB2;GPM6A;PPFIBP1;SLC6A1;PAK3;SLITRK3;GRM5;SLITRK1;CHCHD10;SNCG;CBLN2;PTPRS;NLGN4X;PDZRN3;PPFIA3;PCDHB5;ADGRL3;CACNB4;DSCA…	ImmuneCells
19	GO_Biological_Process_2023__Proton Motive Force-Driven ATP Synthesis (GO:0015986)	-0.445365	-2.95722	0	5.11655e-05	0.001	48/59	42.64%	NDUFA7;ATP5MGL;NDUFB5;ATP5MC1;NDUFB11;ATP5MC3;ATP5PF;NDUFAB1;NDUFB10;NDUFB2;NDUFC2;NDUFA13;ATP5MJ;ATP5F1D;NDUFA2;NDUFA1;NDUFB7;ATP5MF;NDUFB8;ATP5PO;NDUFV2;NDUFA11;NDUFA6;NDUFA8;NDUFA3;NDUFS3;NDUFB3;NDUFB1;NDUFS5;ATP5PD;NDUFS8;ATP5F1E;ATP5MK;ATP5ME;ATP5F1B;NDUFB4;NDUFS7;NDUFC1;NDUFA5;SDHA;NDUFA12;NDUFA9;NDUFS2;ATP5MG;NDUFB9;NDUFV1;NDUFB6;NDUFS6	ImmuneCells
20	GO_Cellular_Component_2023__Dendrite (GO:0030425)	-0.298265	-2.95457	0	4.79677e-05	0.001	127/267	26.54%	CHRNA4;FOXM1;CDK5;SCGN;SLC32A1;ADGRB1;CALB1;HTR1A;THY1;PNOC;SEPTIN4;CHRM4;DRD4;SHANK1;GRIN1;SAMD14;CPT1C;GABRA6;AMIGO1;BRINP2;KNDC1;DNER;CPNE6;HSPA8;P2RY1;HTR2A;GABRG3;SRCIN1;GABRA1;EPHA10;GABRA4;TUBB3;KCNB1;GRIK3;CHRM2;HTR1F;KIF1A;ATCAY;CALB2;ANK3;HCN1;LAMP5;NSG2;VSTM5;MLPH;HCN4;PPP1R9A;HTR2B;PRKAA2;PDYN;NR1D1;HTR2C;EPHA5;MAP1A;GABRG2;BSN;ADCY8;ADORA1;MAPT;NPFF;GRIA1;GABRA5;KCNA1;NCDN;DBN1;GCHFR…	ImmuneCells
21	WikiPathway_2023_Human__GABA Receptor Signaling WP4159	-0.546769	-2.94354	0	4.5146e-05	0.001	21/31	20.28%	SLC32A1;GABRD;GABRA6;GAD2;GABRG3;GABRA1;SLC6A11;GABRA4;GABBR1;GAD1;GABRG2;GABRA5;GABBR2;GABRA3;GABRB3;GABRB2;SLC6A1;GABRA2;GABRG1;GABRB1;AP2S1	ImmuneCells
22	GO_Biological_Process_2023__Proton Motive Force-Driven Mitochondrial ATP Synthesis (GO:0042776)	-0.459654	-2.93676	0	4.26379e-05	0.001	43/52	42.64%	NDUFA7;NDUFB5;NDUFB11;ATP5PF;NDUFAB1;NDUFB10;NDUFB2;NDUFC2;NDUFA13;ATP5F1D;NDUFA2;NDUFA1;NDUFB7;ATP5MF;NDUFB8;ATP5PO;NDUFV2;NDUFA11;NDUFA6;NDUFA8;NDUFA3;NDUFS3;NDUFB3;NDUFB1;NDUFS5;ATP5PD;NDUFS8;ATP5F1E;ATP5ME;ATP5F1B;NDUFB4;NDUFS7;NDUFC1;NDUFA5;SDHA;NDUFA12;NDUFA9;NDUFS2;ATP5MG;NDUFB9;NDUFV1;NDUFB6;NDUFS6	ImmuneCells
23	GO_Molecular_Function_2023__Transmitter-Gated Monoatomic Ion Channel Activity (GO:0022824)	-0.517279	-2.93646	0	4.03938e-05	0.001	26/37	21.57%	HTR3B;GRIN2C;GABRA6;GLRA3;GRIN2B;HTR3E;GABRG3;GABRA1;GABRA4;GRIK3;GRIN2A;HTR3C;GRIN3A;GABRG2;GRIA1;GABRA5;GRIA4;GABRA3;GABRB3;GLRA2;GRIA3;GABRB2;GABRA2;GABRG1;GABRB1;GRIA2	ImmuneCells
24	KEGG_2021_Human__Neuroactive ligand-receptor interaction	-0.290806	-2.92739	0	3.83741e-05	0.001	136/276	23.55%	OXT;SST;CRH;CCKBR;MTNR1A;CHRNA4;NMB;CHRNB2;F2R;CALCR;CORT;GRP;NPFFR2;P2RY13;DRD5;GALR1;SSTR3;CCK;S1PR5;GAL;VIPR1;HTR1A;SSTR1;TAC1;CHRM4;DRD4;VIP;NMU;CYSLTR1;GRIN1;GRIN2C;GABRD;BDKRB2;TACR2;NPW;P2RY10;NPY;GABRA6;PRSS3;GLRA3;MCHR1;GRIN2B;OPRK1;CNR1;EDN3;PTGER1;P2RY1;HTR2A;KNG1;GABRG3;NPB;GIPR;GLP1R;VIPR2;GLRB;GABRA1;ADRA1A;SSTR2;GABRA4;GABBR1;GRIK3;CHRM2;HTR1F;PTH1R;TAC3;NPY1R;NMBR;F2;MCHR2;ADCYAP1…	ImmuneCells
25	KEGG_2021_Human__Neutrophil extracellular trap formation	0.293966	2.90009	0	0.000459638	0.002	69/143	26.71%	TLR2;H2BC14;H3C10;H2BC3;H2AC7;FPR3;FCGR3A;AQP9;FCGR2A;H2AC12;H2AC16;H2BC10;H2BC15;CR1;FPR1;H2BC9;H2BC12;SIGLEC9;PADI4;FPR2;H4C8;FCGR1A;MPO;PIK3R2;H2AC17;SELP;H2AC11;H2BC4;CR1L;H2BC8;H2BC11;H2BC21;H2AC15;ITGA2B;H2BC18;HDAC4;H4C2;H3C1;H2BC7;AZU1;C5AR1;PPIF;MAPK13;RAC2;H2BC5;H2AC6;H2AC21;ITGB3;HDAC11;GP1BA;ITGAL;TLR8;MAPK3;H2BC6;MACROH2A2;CASP1;H2AJ;PLCB3;CASP4;C5;NCF4;CYBA;HDAC7;CYBB;MACROH2A1;NCF2…	ImmuneCells
26	KEGG_2021_Human__Oxidative phosphorylation	-0.351071	-2.88052	0	7.30936e-05	0.002	84/115	44.41%	NDUFA7;ATP4A;ATP12A;NDUFA4L2;ATP6V1C2;COX7A1;ATP6V1F;ATP6V1G2;COX8A;NDUFA4;NDUFB5;ATP6V0D2;ATP5MC1;NDUFB11;ATP5MC3;ATP5PF;NDUFAB1;COX5A;NDUFB10;NDUFB2;COX6A1;COX5B;NDUFC2;NDUFA13;ATP5F1D;NDUFA2;UQCRB;CYC1;NDUFA1;ATP6V1E2;NDUFB7;UQCR11;UQCRHL;COX7A2;ATP5MF;COX6B1;NDUFB8;COX7C;ATP5PO;UQCRFS1;NDUFV2;ATP6V0E2;NDUFA11;NDUFA6;NDUFA8;UQCRQ;COX6C;COX4I1;NDUFA3;UQCRC1;UQCR10;UQCRH;NDUFS3;NDUFB3;NDUFB1;NDU…	ImmuneCells
27	GO_Biological_Process_2023__Neuropeptide Signaling Pathway (GO:0007218)	-0.439743	-2.8549	0	6.97711e-05	0.002	35/54	25.34%	GRP;GALR1;SSTR3;GAL;SSTR1;PNOC;NXPH4;NXPH3;NMU;CYSLTR1;NPY;MCHR1;OPRK1;NPPA;GLRB;CMKLR2;SSTR2;MCHR2;OPRD1;NXPH2;PDYN;GPR83;UTS2R;KISS1R;NMUR1;NTSR2;NPSR1;GPR37;NMUR2;GLRA2;HCRTR2;NPBWR1;SORCS3;OPRM1;GLRA1	ImmuneCells
28	GO_Biological_Process_2023__Cytoplasmic Translation (GO:0002181)	-0.370025	-2.83561	0	6.67376e-05	0.002	68/92	40.57%	RPL19;RPS5;UBA52;RPS15;RPL36AL;RPS27A;RPL18A;RPS26;RPL26L1;RPS27;RPL26;FAU;RPL10A;RPS10;RPLP1;RPS11;RPL41;RPL22L1;RPL24;RPS4X;RPS20;RPL23A;RPL39;RPS23;RPLP2;RPS7;RPL13A;RPS2;RPL7A;RPS6;RPL15;RPL27;RPS3A;RPL32;RPL28;RPS18;RPL29;RPL8;RPL14;RPL35;RPL3;RPL13;RPS14;RPS13;RPL11;RPS25;RPL38;RPS8;RPS16;RPL22;RPL7;RPL36;RPS21;RPL21;RPL6;MRPS12;RPL4;RPL18;EIF3I;RPS3;RPL10;RPL9;RPS15A;RPL34;RPS24;RPL30;RPS2…	ImmuneCells
29	MSigDB_Hallmark_2020__Inflammatory Response	0.267489	2.83486	0	0.000590963	0.003	89/194	23.81%	IL15;TLR2;NOD2;CLEC5A;ADGRE1;ADM;MEFV;OSM;IL4R;EDN1;AQP9;MARCO;PTGIR;LIF;IL18R1;TNFRSF9;RNF144B;FPR1;SLC31A2;APLNR;RGS16;RGS1;CDKN1A;CCRL2;CCL5;FZD5;SERPINE1;PDPN;MYC;IL7R;CD48;IL10;TNFSF15;HIF1A;CCR7;PTGER4;NAMPT;KCNJ2;CALCRL;IL1R1;SLC4A4;SGMS2;SLC11A2;OSMR;HBEGF;TNFAIP6;RTP4;CD82;CCL20;CD14;SLC1A2;PROK2;BST2;AHR;LY6E;C5AR1;F3;SLC31A1;MEP1A;SLC28A2;MSR1;ACVR1B;PLAUR;SLC7A1;PVR;GCH1;LCP2;IRF7;SLC…	ImmuneCells
30	GO_Molecular_Function_2023__Ligand-Gated Monoatomic Anion Channel Activity (GO:0099095)	-0.64814	-2.81271	0	6.39569e-05	0.002	15/18	20.17%	GABRA6;GLRA3;GABRG3;GLRB;GABRA1;GABRA4;GABRG2;GABRA5;GABRA3;GABRB3;GLRA2;GABRB2;GABRA2;GABRG1;GABRB1	ImmuneCells
31	GO_Biological_Process_2023__Mitochondrial Electron Transport, NADH To Ubiquinone (GO:0006120)	-0.50777	-2.795	0	9.20979e-05	0.003	30/34	42.64%	NDUFA7;NDUFA4;NDUFB5;NDUFAB1;NDUFB10;NDUFB2;NDUFC2;NDUFA2;NDUFB7;NDUFB8;NDUFV2;NDUFA6;NDUFA8;NDUFA3;NDUFS3;NDUFB3;NDUFB1;NDUFS5;NDUFS8;NDUFB4;NDUFS7;NDUFC1;NDUFA5;NDUFAF1;NDUFA9;NDUFS2;NDUFB9;NDUFV1;NDUFB6;NDUFS6	ImmuneCells
32	GO_Biological_Process_2023__Regulation Of Catecholamine Secretion (GO:0050433)	-0.569313	-2.76991	0	8.85557e-05	0.003	18/25	23.55%	CHRNA4;CHRNB2;SYT5;SYT9;SYT10;KCNB1;SYT13;SYT3;SYT7;STX1A;SYT2;KCNA2;DRD3;SYT4;SYT15;SYT1;FGF20;HRH3	ImmuneCells
33	GO_Biological_Process_2023__Axon Development (GO:0061564)	-0.371201	-2.75721	0	8.52758e-05	0.003	62/88	40.71%	CDK5;WNT7A;ATOH7;CCK;NEFH;AMIGO1;NEUROD1;NTNG1;PLPPR4;ANK3;L1CAM;BRSK2;NREP;GAP43;RAB3A;NEUROD2;OLIG2;SLITRK2;MAP1A;RTN4RL2;CRTAC1;MAPT;LLGL1;SSNA1;DRD2;SEMA5A;BRSK1;MAP1B;CDK5R1;PLP1;NEUROD6;SLITRK5;NMNAT2;OLIG1;PAK3;SLITRK3;SLITRK1;S100A6;TRIM46;SLITRK4;APBB1;FGFR2;CNTN4;EPHB3;APLP1;BHLHE22;NTNG2;NRCAM;PARD6B;PAX2;FOLR1;SLITRK6;S100B;CTNNA2;DCC;ATL1;ZPR1;KLF7;BAIAP2;GPM6B;SVBP;DHFR	ImmuneCells
34	GO_Cellular_Component_2023__Respiratory Chain Complex I (GO:0045271)	-0.464894	-2.7531	0	7.93947e-05	0.003	35/41	42.64%	NDUFA7;NDUFA4;NDUFB5;NDUFB11;NDUFAB1;NDUFB10;NDUFB2;NDUFC2;NDUFA13;NDUFA2;NDUFA1;NDUFB7;NDUFB8;NDUFV2;NDUFA11;NDUFA6;NDUFA8;NDUFA3;NDUFS3;NDUFB3;NDUFB1;NDUFS5;NDUFS8;NDUFB4;NDUFS7;NDUFC1;NDUFA5;NDUFA12;NDUFAF1;NDUFA9;NDUFS2;NDUFB9;NDUFV1;NDUFB6;NDUFS6	ImmuneCells
35	GO_Cellular_Component_2023__Mitochondrial Respiratory Chain Complex I (GO:0005747)	-0.464894	-2.7531	0	7.93947e-05	0.003	35/41	42.64%	NDUFA7;NDUFA4;NDUFB5;NDUFB11;NDUFAB1;NDUFB10;NDUFB2;NDUFC2;NDUFA13;NDUFA2;NDUFA1;NDUFB7;NDUFB8;NDUFV2;NDUFA11;NDUFA6;NDUFA8;NDUFA3;NDUFS3;NDUFB3;NDUFB1;NDUFS5;NDUFS8;NDUFB4;NDUFS7;NDUFC1;NDUFA5;NDUFA12;NDUFAF1;NDUFA9;NDUFS2;NDUFB9;NDUFV1;NDUFB6;NDUFS6	ImmuneCells
36	GO_Biological_Process_2023__Aerobic Respiration (GO:0009060)	-0.417944	-2.75134	0	7.67482e-05	0.003	45/58	42.64%	NDUFA7;SURF1;BLOC1S1;NDUFB5;NDUFB11;NDUFAB1;NDUFB10;NDUFB2;NDUFC2;NDUFA13;ATP5F1D;NDUFA2;CHCHD10;UQCRB;NDUFA1;NDUFB7;NDUFB8;NDUFV2;SLC25A51;NDUFA11;NDUFA6;NDUFA8;MDH2;NDUFA3;UQCRC1;UQCRH;NDUFS3;NDUFB3;NDUFB1;NDUFS5;NDUFS8;NDUFB4;SLC25A14;NDUFS7;NDUFC1;ME3;NDUFA5;NDUFA12;SIRT3;NDUFA9;NDUFS2;NDUFB9;NDUFV1;NDUFB6;NDUFS6	ImmuneCells
37	GO_Molecular_Function_2023__NADH Dehydrogenase (Ubiquinone) Activity (GO:0008137)	-0.505266	-2.74592	0	0.000123787	0.005	29/33	42.64%	NDUFA7;NDUFA4;NDUFB5;NDUFB10;NDUFB2;NDUFC2;NDUFA2;NDUFB7;NDUFB8;NDUFV2;NDUFA6;NDUFA8;NDUFA3;NDUFS3;NDUFB3;NDUFB1;NDUFS5;NDUFS8;NDUFB4;NDUFS7;NDUFC1;NDUFA5;NDUFA12;NDUFA9;NDUFS2;NDUFB9;NDUFV1;NDUFB6;NDUFS6	ImmuneCells
38	KEGG_2021_Human__Cytokine-cytokine receptor interaction	0.247942	2.71762	0	0.00258546	0.013	80/210	16.85%	IL15;IL1R2;MSTN;ACKR3;TNFSF11;TNFRSF11B;CXCL1;IFNLR1;OSM;IL4R;CXCR4;IL1RL1;LIF;CXCL3;CCL8;IL18R1;TNFRSF9;IL27;IL11RA;IL2RG;IL21R;TNFSF14;CXCL2;CCL3;CCL5;IL17B;TGFB3;BMP6;GDF15;TNFSF13B;IL3RA;IL7;THPO;NODAL;IL7R;IL34;INHBB;IL33;IL10;TNFSF15;CCR3;IL17RB;CCR7;IL1RN;IL1R1;OSMR;EPO;IL2RA;CCL20;CCR4;TNFRSF10C;PRLR;BMPR1B;CXCL5;TGFB2;TNFRSF19;TNFSF4;IL5;CXCL17;AMH;TGFBR1;TNFRSF13B;CCR5;IL23A;TNFSF13;ACV…	ImmuneCells
39	GO_Molecular_Function_2023__miRNA Binding (GO:0035198)	0.466338	2.7173	0	0.00229819	0.013	28/29	47.82%	DND1;MATR3;ZC3H12A;LIN28A;TRIM71;POU5F1;SOX2;DDX21;ZC3H10;PNPT1;RBM10;HNRNPA1;AGO4;ZC3H7B;YBX1;TUT7;ZC3H7A;TUT4;ELAVL1;AGO3;PUM1;HNRNPA2B1;RC3H1;PUM2;RBM4;FMR1;AGO2;ZNF346	ImmuneCells
40	GO_Cellular_Component_2023__Large Ribosomal Subunit (GO:0015934)	-0.431376	-2.69979	0	0.000162799	0.007	40/49	40.57%	RPL3L;RPL19;UBA52;RPL39L;RPL36AL;RPL18A;RPL26L1;RPL26;RPL10A;RPLP1;RPL41;RPL24;RPL23A;RPL39;RPLP2;RPL13A;RPL7A;RPL15;RPL27;RPL32;RPL28;RPL29;RPL8;RPL14;RPL35;RPL3;RPL13;RPL11;RPL38;RPL22;RPL7;RPL36;RPL21;RPL6;RPL4;RPL18;RPL9;RPL34;RPL30;RPL35A	ImmuneCells
41	GO_Cellular_Component_2023__Cytosolic Large Ribosomal Subunit (GO:0022625)	-0.431376	-2.69979	0	0.000162799	0.007	40/49	40.57%	RPL3L;RPL19;UBA52;RPL39L;RPL36AL;RPL18A;RPL26L1;RPL26;RPL10A;RPLP1;RPL41;RPL24;RPL23A;RPL39;RPLP2;RPL13A;RPL7A;RPL15;RPL27;RPL32;RPL28;RPL29;RPL8;RPL14;RPL35;RPL3;RPL13;RPL11;RPL38;RPL22;RPL7;RPL36;RPL21;RPL6;RPL4;RPL18;RPL9;RPL34;RPL30;RPL35A	ImmuneCells
42	KEGG_2021_Human__Hematopoietic cell lineage	0.33078	2.67567	0	0.00413674	0.026	33/83	12.05%	IL1R2;ANPEP;CD1D;IL4R;CD36;CD44;HLA-DOB;IL11RA;ITGA4;CR1;CD38;MS4A1;HLA-DQB1;IL3RA;IL7;THPO;FCGR1A;IL7R;ITGA2;FLT3;TFRC;MME;CR1L;IL1R1;CD5;CD34;ITGA2B;EPO;IL2RA;HLA-DQA1;CD14;FCER2;IL5	ImmuneCells
43	GO_Biological_Process_2023__Regulation Of Calcium Ion-Dependent Exocytosis (GO:0017158)	-0.5281	-2.66456	0	0.000338595	0.015	18/27	21.17%	CBARP;SYT5;SYT9;SYT10;KCNB1;SYT13;BAIAP3;SYT3;SYT7;TRPV6;RPH3A;STX1A;SYT2;SYT4;SYT15;SYT1;STXBP1;SCAMP5	ImmuneCells
44	GO_Biological_Process_2023__Defense Response To Bacterium (GO:0042742)	0.280066	2.66138	0	0.00463817	0.032	59/128	23.56%	SLAMF8;TLR2;SLC11A1;NOD2;S100A8;FGR;BPI;S100A9;EPX;GBP2;AQP1;IRGM;SERPINE1;H2BC12;CFP;FPR2;COLEC12;JCHAIN;STAB2;MPO;GBP7;OAS3;SELP;MYD88;OAS2;H2BC8;H2BC11;H2BC21;LPO;GBP1;GSDMA;ISG15;GNLY;LYZ;CEBPB;AZU1;GBP6;F3;MR1;LYG2;IL23A;FCER1G;TNFRSF14;LYG1;STAB1;GBP3;HMGB2;RNF31;SPN;NLRC4;HLA-A;CASP1;GBP4;RNASE6;CASP4;ZNFX1;RPS19;TLR3;EHHADH	ImmuneCells
45	GO_Biological_Process_2023__Nervous System Development (GO:0007399)	-0.246356	-2.64956	0	0.000372777	0.017	178/411	26.51%	SPINK5;PPP1R17;BDNF;CBLN1;SHH;PCDHB11;DPF1;CDK5;NAV2;ZIC4;NES;GFRA1;ADGRB1;NRGN;EFNB3;PCDHB3;PCDHB13;BOC;FGF17;VAX1;CSPG5;CYP26C1;MAMDC2;PCDHB2;GRHL2;PCDHB10;VXN;MET;IGF2BP3;FGF5;LY6H;HES5;BRINP2;CHST8;DNER;DLX5;SOX11;PLPPR1;LGI1;ASCL1;MESP1;NEUROD1;VAX2;INHBA;PCDHB9;SOX8;EGR2;GLRB;ADGRB2;DCX;CHRM2;SDK2;APC2;CDH1;EMX1;L1CAM;ADGRF1;TAGLN3;PCDH1;EMX2;OLFM1;ARNT2;NELL1;IGSF8;NRSN1;FGF2;MYT1L;NEUROD2…	ImmuneCells
46	GO_Molecular_Function_2023__NADH Dehydrogenase (Quinone) Activity (GO:0050136)	-0.478818	-2.64704	0	0.000362422	0.017	29/34	42.64%	NDUFA7;NDUFA4;NDUFB5;NDUFB10;NDUFB2;NDUFC2;NDUFA2;NDUFB7;NDUFB8;NDUFV2;NDUFA6;NDUFA8;NDUFA3;NDUFS3;NDUFB3;NDUFB1;NDUFS5;NDUFS8;NDUFB4;NDUFS7;NDUFC1;NDUFA5;NDUFA12;NDUFA9;NDUFS2;NDUFB9;NDUFV1;NDUFB6;NDUFS6	ImmuneCells
47	GO_Molecular_Function_2023__Voltage-Gated Potassium Channel Activity (GO:0005249)	-0.371938	-2.63657	0	0.00037337	0.018	41/74	22.54%	KCNA5;KCNS2;KCNK2;KCNH2;LRRC55;KCNA7;KCNG1;KCNK1;KCNJ4;KCNV1;KCNJ9;KCNJ6;KCNA6;KCNA4;KCNH4;KCNJ12;KCNS3;KCNH6;KCNB1;KCNH3;KCNG3;KCNA3;KCNF1;KCNN1;HCN4;KCNT1;KCNE5;KCNJ3;KCNA1;KCND3;KCNA2;HCN2;KCNB2;KCNH5;KCNJ16;KCNQ2;KCNC2;KCNT2;KCNC1;KCNJ11;KCND2	ImmuneCells
48	GO_Biological_Process_2023__Regulation Of Synaptic Transmission, Glutamatergic (GO:0051966)	-0.406982	-2.63471	0	0.000383741	0.019	31/54	22.62%	CCL2;CDK5;GRIN1;GRIN2C;CACNG2;UNC13A;CACNG7;GRIN2B;MAPK8IP2;CACNG8;GRIK3;PLPPR4;GRIN2A;HCN1;TNF;SHANK3;TPRG1L;DRD1;GRM3;DRD2;CDH2;GRM2;DRD3;CACNG3;SYT1;GRM5;DGKI;RELN;CACNG5;GRM8;GRM1	ImmuneCells
49	GO_Molecular_Function_2023__Channel Activity (GO:0015267)	0.381314	2.62624	0	0.00471129	0.035	27/45	26.29%	BCL2A1;AQP7;AQP9;AQP7B;CHRNB1;ASIC4;SLC14A1;RHCE;PDPN;P2RX6;RHCG;SCNN1G;CHRNA1;AQP3;GSDMA;AQP4;AQP8;RHD;TRPA1;MCL1;MCUB;AQP11;SLC12A4;TMEM266;TRPV2;BAX;GSDME	ImmuneCells
50	GO_Cellular_Component_2023__Postsynaptic Density (GO:0014069)	-0.301843	-2.61957	0	0.000373902	0.019	83/149	31.93%	FOXM1;INSYN1;CDK5;ADGRB1;SHANK1;SHISA7;GRIN1;GRIN2C;CACNG2;SAMD14;CACNG7;GRIN2B;P2RY1;MAPK8IP2;SH2D5;SRCIN1;RNF112;CACNG8;ADGRA1;GRIK3;PLPPR4;GRIN2A;DLG3;PPP1R9A;GAP43;ATP2B2;IQSEC3;SHANK3;GRIN3A;ADCY8;GRIA1;KCND3;NETO1;ADD2;ARHGAP44;SLC8A3;CDH2;CDK5R1;GRIA4;SHANK2;CACNG3;AKAP5;GRIA3;SHISA9;RGS14;KALRN;GRM5;FYN;SPOCK1;DNAJC6;PTPRS;GRIA2;LZTS3;LRRC7;SCRIB;CACNG5;KCND2;GRM1;RPS27;MAGI2;CTNND2;HIP1R…	ImmuneCells
51	GO_Biological_Process_2023__Regulation Of Postsynaptic Membrane Potential (GO:0060078)	-0.463525	-2.6104	0	0.000383741	0.02	20/35	18.67%	CHRNA4;FOXM1;INSYN1;DRD4;GRIN1;GRIN2C;GABRA6;GRIN2B;MAPK8IP2;GABRG3;GABRA1;GABRA4;GRIN2A;GABRG2;NPFF;GABRA5;DRD2;GABRA3;GABRA2;GABRG1	ImmuneCells
52	GO_Biological_Process_2023__Axonogenesis (GO:0007409)	-0.284824	-2.60502	0	0.000393101	0.021	110/180	39.01%	BDNF;SHH;CDK5;WNT7A;CCK;EFNB3;SLIT2;BOC;NOTCH3;NEFH;SEMA3G;LGI1;EFNA2;ARHGEF25;EFNB2;KIF5C;EPHA10;LRTM2;KIF5A;ROBO4;NTNG1;TUBB3;SEMA3E;CYFIP2;PLPPR4;RET;ANK3;L1CAM;BRSK2;NELL1;RAB3A;SLITRK2;TNR;EPHA5;MAP1A;LRTM1;LLGL1;SSNA1;DRD2;EPHA4;SEMA5A;CXCL12;BRSK1;MAP1B;DPYSL5;CDK5R1;B4GALT6;EFNA5;SEMA3C;SLITRK5;FEZ1;ENAH;PAK3;SLITRK3;KALRN;GLI2;HSP90AB1;SLITRK1;FYN;SEMA3D;ROBO2;RELN;HSP90AA1;S100A6;TRIM46…	ImmuneCells
53	GO_Biological_Process_2023__Cellular Response To Type I Interferon (GO:0071357)	0.502785	2.60083	0	0.0057278	0.045	19/23	32.81%	IFITM2;IFI27;IFITM3;MYD88;OAS2;HDAC4;IKBKE;IFIT1;STAT1;IFNAR2;TBKBP1;IRAK1;STAT2;SP100;TYK2;TRAF3;TANK;MAVS;IFNAR1	ImmuneCells
54	GO_Biological_Process_2023__Defense Response To Symbiont (GO:0140546)	0.266914	2.59984	0	0.00531867	0.045	57/131	23.78%	TLR2;NLRC5;GBP2;IFI44L;IFNLR1;PLA2G10;OASL;AIM2;PLSCR1;SLFN13;DDIT4;IFIT1B;IFITM2;MX2;IFI27;ISG20;IFITM3;GBP7;OAS3;IGF2BP1;MYD88;IFIT3;OAS2;IFI6;EXOSC4;RTP4;ISG15;GBP5;MX1;BST2;AZU1;IKBKE;RSAD2;IFIT2;IRF7;APOBEC3C;DDX60;IFIT1;LILRB1;RIPK3;NLRP9;STAT1;IFNAR2;TLR8;DDX60L;IFIT5;TBKBP1;IRF1;CASP1;AGBL5;MLKL;RNASE6;STAT2;ZNFX1;TLR3;IFIH1;RIGI	ImmuneCells
55	WikiPathway_2023_Human__Complement System WP2806	0.319382	2.58663	0	0.00569951	0.052	38/77	23.30%	TLR2;CFB;F13A1;ADM;APOA1;VSIG4;THBS1;FCGR3A;F11;C7;CD93;CR1;FPR1;SPP1;CFP;F10;ITGA2;SELP;PTX3;VTN;ITGA2B;LAMA5;LRP2;FCER2;C5AR1;CFD;PLAUR;LAMC1;SERPING1;ITGB3;PROS1;CD55;C5AR2;ICAM1;C5;PRKACA;C1S;RPS19	ImmuneCells
56	WikiPathway_2023_Human__Type I Interferon Induction And Signaling During SARS CoV 2 Infection WP4868	0.44713	2.58545	0	0.00534329	0.052	23/29	37.28%	TLR2;TMPRSS2;ACE2;OAS3;MYD88;OAS2;IKBKE;IRF7;STAT1;IFNAR2;STAT2;TLR3;IFIH1;RIGI;IRF9;TYK2;EIF2AK2;TRAF3;MAVS;IFNAR1;TLR6;IRAK4;TBK1	ImmuneCells
57	GO_Biological_Process_2023__Cell Junction Assembly (GO:0034329)	-0.335568	-2.58544	0	0.000420288	0.022	54/92	32.10%	BDNF;CDH13;PCDHB11;CDK5;PCDHB3;PCDHB13;GJC1;PCDHB2;GRHL2;PCDHB10;DNER;PCDHB9;SDK2;CDH7;CDH1;ADGRF1;SHANK3;CDH17;FLRT3;TRPV4;CDH4;ARVCF;DRD1;CDH22;PCDHB14;DRD2;NRXN2;CDH2;SPOCK2;CDH3;SHANK2;CDH11;GPM6A;SLITRK1;CDHR3;CDH9;PCDHB5;ADGRL3;CDH12;DSCAM;NRXN1;KIRREL3;CDH6;CTNND2;FN1;NRCAM;PARD6B;CDH18;FSCN1;NLGN3;CDH10;CDH8;CDH15;PKP3	ImmuneCells
58	KEGG_2021_Human__Circadian entrainment	-0.334051	-2.58217	0	0.000428362	0.023	47/93	24.91%	CACNA1G;MTNR1A;GNGT1;GUCY1A1;GNG3;GNG13;GRIN1;GRIN2C;KCNJ9;KCNJ6;GRIN2B;GNG11;CAMK2A;CALML4;ITPR3;CACNA1H;PER3;ADCYAP1;GRIN2A;PLCB4;CAMK2B;GUCY1B1;GNG4;CACNA1I;GUCY1A2;KCNJ3;ADCY1;ADCY8;PLCB1;GNB5;GNG8;NOS1AP;CALM1;GRIA1;GNAO1;CALM3;GRIA4;PRKCG;ADCY5;GRIA3;ADCYAP1R1;GRIA2;GNB3;RPS6KA5;RYR2;GNG10;CALM2	ImmuneCells
59	GO_Biological_Process_2023__Calcium-Dependent Cell-Cell Adhesion Via Plasma Membrane Cell Adhesion Molecules (GO:0016339)	-0.444192	-2.56404	0	0.000523284	0.028	28/37	32.04%	CDH13;PCDHB11;PCDHB3;PCDHB13;PCDHB2;PCDHB10;PCDHB9;CDH7;CDH1;CDH17;CDH4;CDH22;PCDHB14;PCDHGC3;CDH2;CDH3;CDH11;CDHR3;CDH9;SELL;PCDHB5;CDH12;CDH23;CDH6;CDH18;CDH10;CDH8;CDH15	ImmuneCells
60	KEGG_2021_Human__Parkinson disease	-0.267861	-2.56156	0	0.000511655	0.028	147/228	45.13%	NDUFA7;TUBB2A;NDUFA4L2;COX7A1;CAMK2A;SEPTIN5;TUBA4A;CALML4;KIF5C;KIF5A;ITPR3;TUBB3;COX8A;TUBB4A;NDUFA4;NDUFB5;CAMK2B;SLC25A4;UBB;UCHL1;ATP5MC1;PSMA8;NDUFB11;ATP5MC3;ATP5PF;TUBA1A;PSMC3;SNCAIP;MAPT;NDUFAB1;CALM1;COX5A;CYCS;DRD1;CALM3;GNAL;NDUFB10;PSMD8;NDUFB2;DRD2;COX6A1;TXN;COX5B;GPR37;NDUFC2;UBA52;ADCY5;NDUFA13;ATP5F1D;MAOB;NDUFA2;RPS27A;UQCRB;CYC1;NDUFA1;NDUFB7;UQCR11;UQCRHL;TUBB4B;COX7A2;COX6B…	ImmuneCells
61	GO_Biological_Process_2023__Regulation Of Dopamine Secretion (GO:0014059)	-0.563134	-2.55508	0	0.000550585	0.031	15/21	23.16%	CHRNB2;SYT5;SYT9;SYT10;SYT13;SYT3;SYT7;GDNF;SYT2;KCNA2;DRD3;SYT4;SYT15;SYT1;FGF20	ImmuneCells
62	GO_Cellular_Component_2023__Voltage-Gated Potassium Channel Complex (GO:0008076)	-0.365582	-2.54823	0	0.000587859	0.034	38/70	22.54%	KCNA5;KCNS2;KCNH2;LRRC55;KCNA7;KCNG1;KCNK1;KCNJ4;KCNV1;KCNAB1;KCNJ6;KCNA6;KCNA4;KCNH4;KCNS3;DPP6;KCNB1;KCNG3;KCNA3;HCN1;KCNF1;KCNIP3;KCNN1;HCN4;KCNE5;KCNJ3;KCNA1;KCNMB2;KCND3;KCNA2;HCN2;KCNB2;KCNJ16;KCNQ2;KCNC2;KCNC1;KCNAB3;KCND2	ImmuneCells
63	KEGG_2021_Human__GABAergic synapse	-0.335656	-2.54136	0	0.000591601	0.035	41/88	20.52%	CACNA1S;GNGT1;SLC6A12;SLC32A1;GNG3;GNG13;SLC38A3;HAP1;GABRD;KCNJ6;GABRA6;GNG11;GAD2;GABRG3;GABRA1;SLC6A11;GABRA4;GABBR1;GAD1;SLC38A1;GNG4;ADCY1;SLC12A5;GABRG2;ADCY8;GNB5;GNG8;GABRA5;GNAO1;GABBR2;GLS2;GABRA3;GABRB3;PRKCG;ADCY5;GABRB2;SLC6A1;GABRA2;GABRG1;GABRB1;GABARAP	ImmuneCells
64	GO_Molecular_Function_2023__Neuropeptide Activity (GO:0160041)	-0.549972	-2.53193	0	0.000598636	0.037	11/20	6.12%	OXT;CRH;NMB;CORT;GRP;CCK;GAL;PNOC;VIP;NPY;NPPA	ImmuneCells
65	GO_Molecular_Function_2023__Neuropeptide Hormone Activity (GO:0005184)	-0.549972	-2.53193	0	0.000598636	0.037	11/20	6.12%	OXT;CRH;NMB;CORT;GRP;CCK;GAL;PNOC;VIP;NPY;NPPA	ImmuneCells
66	GO_Biological_Process_2023__Type I Interferon-Mediated Signaling Pathway (GO:0060337)	0.494786	2.52727	0	0.00940906	0.097	18/22	32.81%	IFITM2;IFI27;IFITM3;MYD88;OAS2;HDAC4;IKBKE;STAT1;IFNAR2;TBKBP1;IRAK1;STAT2;SP100;TYK2;TRAF3;TANK;MAVS;IFNAR1	ImmuneCells
67	GO_Cellular_Component_2023__Dendrite Membrane (GO:0032590)	-0.491915	-2.52633	0	0.000662142	0.042	20/28	24.31%	FOXM1;THY1;SHISA7;GABRA6;GABRG3;GABRA1;GABRA4;KCNB1;LAMP5;ATP2B2;GABRG2;GRIA1;GABRA5;GABRA3;SHISA9;GABRA2;GABRG1;KCNC2;KCNC1;SGCE	ImmuneCells
68	GO_Cellular_Component_2023__Potassium Channel Complex (GO:0034705)	-0.347821	-2.52546	0	0.000649408	0.042	40/77	22.54%	KCNA5;KCNS2;KCNH2;LRRC55;KCNA7;KCNG1;KCNK1;KCNJ4;KCNV1;KCNAB1;KCNJ6;KCNA6;KCNA4;KCNH4;KCNS3;DPP6;KCNB1;GRIK3;ABCC9;KCNG3;KCNA3;KCNF1;KCNIP3;KCNN1;KCNE5;KCNJ3;ABCC8;KCNA1;KCNMB2;KCND3;KCNA2;HCN2;KCNB2;KCNJ16;KCNQ2;KCNC2;KCNC1;KCNAB3;KCNJ11;KCND2	ImmuneCells
69	GO_Biological_Process_2023__Interferon-Mediated Signaling Pathway (GO:0140888)	0.434062	2.51893	0	0.00980561	0.104	23/30	34.80%	IFNLR1;IFITM2;IFI27;IFITM3;MYD88;OAS2;HDAC4;IKBKE;IL10RB;STAT1;IFNAR2;TBKBP1;IRF1;IRAK1;STAT2;SP100;TYK2;TRAF3;TANK;MAVS;IFNAR1;HCK;IFNGR2	ImmuneCells
70	GO_Biological_Process_2023__Response To Cytokine (GO:0034097)	0.271156	2.51856	0	0.0093621	0.105	63/117	31.00%	SLC11A1;FOXH1;JAK3;CHI3L1;MEFV;IFNLR1;CXCR4;PLSCR1;IFITM2;MX2;TIMP3;IFITM3;SHMT2;NLRP12;FLT3;SELP;MYD88;CCR7;MME;IL1R1;OSMR;TMEM102;HCLS1;TRIM21;ISG15;MX1;HDAC4;BST2;ASAH2;IKBKE;ITIH4;TRIM32;RELB;GCH1;NFKB2;ALDH1A2;MCL1;TIMP1;SPHK1;STAT1;IFNAR2;XAF1;LGALS9;IRAK1;CXCL16;REL;SP100;KHSRP;PML;EIF2AK2;CIITA;ADAM9;KYNU;IRAK3;CALCOCO2;NFKB1;SHFL;BCL2;DDOST;MAP2K7;CASP8;TRIM56;MAPKAPK3	ImmuneCells
71	GO_Biological_Process_2023__Synapse Assembly (GO:0007416)	-0.355387	-2.51608	0	0.000767482	0.048	42/69	30.51%	BDNF;PCDHB11;CDK5;WNT7A;PCDHB3;PCDHB13;CBLN4;PCDHB2;PCDHB10;DNER;PCDHB9;GABRA1;SDK2;CDH1;ADGRF1;SHANK3;GABRG2;FLRT3;DRD1;PCDHB14;DRD2;NRXN2;CDH2;SPOCK2;SHANK2;GABRB3;GPM6A;GABRB2;LGI2;GABRA2;SLITRK1;NLGN4X;PCDHB5;ADGRL3;DSCAM;NRXN1;KIRREL3;NRCAM;PTPRD;GRID2;NLGN3;FZD1	ImmuneCells
72	GO_Biological_Process_2023__Modulation Of Excitatory Postsynaptic Potential (GO:0098815)	-0.463206	-2.51405	0	0.000767482	0.049	24/31	34.93%	CBLN1;WNT7A;SHANK1;GRIN1;GRIN2C;GRIN2B;STX1B;GRIN2A;SHANK3;NETO1;TMEM25;SLC8A3;RELN;CUX2;NLGN4X;RIMS2;NRXN1;RIMS1;PRKCZ;TMEM108;CHRNA7;NLGN3;NLGN1;DLG4	ImmuneCells
73	GO_Molecular_Function_2023__Regulatory RNA Binding (GO:0061980)	0.383028	2.51398	0	0.00910083	0.108	37/39	54.80%	PIWIL1;PIWIL3;DND1;MATR3;ZC3H12A;LIN28A;TRIM71;POU5F1;SOX2;TARBP2;DDX21;ZC3H10;PNPT1;RBM10;HNRNPA1;AGO4;ZC3H7B;YBX1;TUT7;ZC3H7A;DICER1;FAM172A;DHX9;TUT4;ELAVL1;AGO3;PUM1;HNRNPA2B1;RC3H1;PUM2;RBM4;FMR1;AGO2;ZNF346;PIWIL4;PRKRA;TLR7	ImmuneCells
74	KEGG_2021_Human__Retrograde endocannabinoid signaling	-0.290491	-2.51311	0	0.000767482	0.05	68/140	26.90%	CACNA1S;GNGT1;MAPK11;NDUFA7;SLC32A1;GNG3;GNG13;MGLL;NDUFA4L2;GABRD;KCNJ9;KCNJ6;GABRA6;CNR1;GNG11;GABRG3;GABRA1;ITPR3;GABRA4;SLC17A6;MAPK12;NDUFA4;PLCB4;NDUFB5;GNG4;KCNJ3;NDUFB11;ADCY1;GABRG2;ADCY8;PLCB1;GNB5;GNG8;NDUFAB1;GRIA1;GABRA5;GNAO1;NDUFB10;FAAH;NDUFB2;SLC17A7;GRIA4;NDUFC2;GABRA3;GABRB3;PRKCG;ADCY5;GRIA3;GABRB2;GABRA2;GABRG1;NDUFA13;GRM5;NDUFA2;GABRB1;SLC17A8;NDUFA1;GRIA2;NDUFB7;GRM1;GNB3;…	ImmuneCells
75	GO_Cellular_Component_2023__Postsynaptic Specialization Membrane (GO:0099634)	-0.437318	-2.51026	0	0.000767482	0.051	26/38	28.94%	GRIN2C;CACNG2;CACNG7;GRIN2B;CACNG8;GRIK3;PLPPR4;GRIN2A;DLG3;GRIN3A;GRIA1;NETO1;LRRTM2;GRIA4;LRRTM1;CACNG3;GRIA3;SLITRK3;GRM5;PTPRS;GRIA2;CACNG5;GRM1;GRID1;GRIK5;GRID2	ImmuneCells
76	GO_Biological_Process_2023__Macromolecule Biosynthetic Process (GO:0009059)	-0.274938	-2.51018	0	0.000754018	0.051	113/178	40.85%	ALAS2;GSPT2;RPL3L;IGF2BP3;EEF1G;MRPL12;INHBA;MRPL51;MRPL10;EEF1A2;MRPL27;MRPL28;GAL3ST4;RPL19;B4GAT1;MRPL24;MRPL23;RPS5;MRPS33;FUT9;RPS15;MRPS17;RPL36AL;EIF5A2;INHA;MRPL55;RPS27A;COL5A1;MRPL36;MRPL9;TUFM;RPL18A;EEF1B2;RPS26;MRPL34;RPS27;MRPS15;RPL26;DHPS;FAU;RPL10A;RPS10;RPLP1;RPS11;RPL41;RPL24;RPS4X;RPS20;RPL23A;RPL39;RPS23;RPLP2;RPS7;RPL13A;RPS2;RPL7A;RPS6;MRPS7;RPL15;RPL27;RPS3A;RPL32;RPL28;RP…	ImmuneCells
77	GO_Molecular_Function_2023__Voltage-Gated Monoatomic Cation Channel Activity (GO:0022843)	-0.360405	-2.49916	0	0.00080718	0.055	42/71	27.22%	CACNA1S;KCNS2;KCNH2;CACNA2D2;LRRC55;KCNK1;KCNV1;CACNG2;CACNG7;KCNA6;KCNA4;KCNH4;KCNS3;CACNG8;KCNH3;HCN1;KCNF1;HCN4;CACNA1I;KCNE5;KCNA1;KCND3;KCNA2;HCN2;KCNH5;CACNG3;CACNB2;KCNQ2;NCS1;KCNC2;KCNC1;CACNA1E;CACNG5;KCNJ11;KCND2;CACNB4;CACNA2D1;OPRM1;CACNA2D3;HVCN1;KCNH8;KCNQ5	ImmuneCells
78	GO_Biological_Process_2023__Cell-Cell Adhesion Via Plasma-Membrane Adhesion Molecules (GO:0098742)	-0.279564	-2.49536	0	0.000819515	0.056	94/156	36.11%	CLDN1;CDH13;CBLN1;MAG;PCDHB11;CLDN7;AMIGO2;PCDHB3;PCDHB13;JAML;PCDHB2;CADM3;CRB2;PCDHB10;CLDN16;AMIGO1;CD6;CLDN11;PLXNB3;PCDHB9;VCAM1;PTK7;ROBO4;NTNG1;SDK2;NECTIN1;CDH7;CDH1;SCARF2;L1CAM;CLDN18;TENM3;CLDN23;SLITRK2;LRFN5;CDH17;FLRT3;CDH4;PTPRF;CDH22;PCDHB14;FAT4;PSG2;TENM1;LRRC4B;PCDHGC3;CDH2;CDH3;LRFN4;CADM4;CDH11;SLITRK3;SLITRK1;PTPRT;SELE;ROBO2;CDHR3;CDH9;PTPRS;CLDN10;SELL;MPZ;PCDHB5;CELSR2;AD…	ImmuneCells
79	GO_Molecular_Function_2023__Hormone Activity (GO:0005179)	-0.407797	-2.47827	0	0.00102331	0.07	21/46	10.98%	OXT;SST;CRH;NMB;CORT;GRP;VGF;IGF1;CCK;GAL;PNOC;C1QTNF12;VIP;NPY;NPPC;EDN3;NPPA;KNG1;INHBA;CHGB;PTHLH	ImmuneCells
80	GO_Cellular_Component_2023__Axon (GO:0030424)	-0.265785	-2.47167	0	0.00111977	0.078	115/199	38.71%	CALCR;CDK5;ATOH7;SYT5;CCK;CALB1;ATP2B3;BOC;SEPTIN4;SCN10A;NEFH;CPT1C;KCNA4;CPNE6;CLDN11;ATP1A3;SRCIN1;PTK7;ROBO4;TUBB3;KCNB1;GRIK3;KIF1A;ATCAY;RET;NFIB;KCNA3;NEFM;HCN1;L1CAM;OLFM1;VSTM5;NELL1;HCN4;RAB3A;PRKAA2;SYT7;NTRK1;EPHA5;MAP1A;BSN;ADCY8;CD200;RTN4RL2;MAPT;NCDN;GRM3;SYT2;LLGL1;SSNA1;DRD2;EPHA4;SEPTIN14;SCN2A;SLC8A3;NEFL;KCNA2;MAP1B;CDK5R1;ALDH1A1;HCN2;GRM2;LRRTM1;FEZ1;SYT4;SLC6A1;SYT1;ADAM22…	ImmuneCells
81	KEGG_2021_Human__Cardiac muscle contraction	-0.344097	-2.46788	0	0.00115122	0.081	52/78	36.30%	CACNA1S;MYH7;CACNA2D2;CACNG1;CASQ2;CACNG2;CACNG7;COX7A1;ATP1A3;CACNG8;ACTC1;COX8A;TRDN;TNNI3;COX5A;COX6A1;SLC8A3;COX5B;CACNG3;CACNB2;UQCRB;CYC1;UQCR11;UQCRHL;COX7A2;CACNG5;MYL4;COX6B1;CACNB4;TNNT2;COX7C;UQCRFS1;RYR2;ATP2A3;CACNA2D1;CACNA2D3;UQCRQ;TPM1;COX6C;ATP1B1;COX4I1;UQCRC1;UQCR10;UQCRH;TPM2;CACNB1;COX6A2;ATP1A4;TNNC1;COX7B;CACNG6;HRC	ImmuneCells
82	KEGG_2021_Human__Taste transduction	-0.357769	-2.46725	0	0.00114513	0.081	37/66	22.73%	CALHM1;HTR3B;HTR1A;ENTPD2;GNG13;TAS1R1;TRPM5;GABRA6;HTR3E;P2RY1;GABRA1;ITPR3;GABRA4;GABBR1;HTR1F;HCN4;PLCB4;HTR3C;TAS2R3;ADCY8;PLCB1;GABRA5;SCNN1B;TAS2R5;GABBR2;SCN2A;SCNN1A;SCN3A;TAS2R31;GABRA3;PDE1C;GABRA2;CHRM3;HTR1E;ASIC2;GRM1;GNB3	ImmuneCells
83	GO_Molecular_Function_2023__G Protein-Coupled Receptor Activity (GO:0004930)	-0.260192	-2.46377	0	0.00116322	0.084	93/203	23.05%	GPR55;MTNR1A;GPR87;F2R;FFAR2;NPFFR2;P2RY13;DRD5;GALR1;SSTR3;ADGRB1;VIPR1;CX3CR1;GPR17;TAS1R1;FFAR1;CYSLTR1;ADGRD2;P2RY10;NPY;MRGPRF;GPR174;MCHR1;OPRK1;CNR1;P2RY1;GPR27;GIPR;ADGRL4;VIPR2;ADGRB2;CMKLR2;HCAR1;GPR4;ADGRA1;GABBR1;PTH1R;PROKR2;GPR171;FFAR4;MCHR2;ADGRF1;GPR52;OPRD1;CXCR6;GPR26;GPR63;ADGRG6;RHO;CXCR5;ADGRD1;GPR83;RORB;CNR2;UTS2R;ADORA1;NPR3;KISS1R;DRD1;GPR88;GRM3;NMUR1;NTSR2;DRD2;GABBR2;…	ImmuneCells
84	GO_Biological_Process_2023__Defense Response To Virus (GO:0051607)	0.237869	2.43973	0	0.0160873	0.199	88/170	32.21%	TLR2;NLRC5;GBP2;IFI44L;IFNLR1;PLA2G10;OASL;AIM2;TRIM6;PLSCR1;SLFN13;DDIT4;IFIT1B;IFITM2;USP18;MX2;IFI27;ISG20;IFITM3;TRIM25;GBP7;OAS3;IGF2BP1;MYD88;IFIT3;OAS2;IFI6;EXOSC4;TRIM21;RTP4;ISG15;GBP5;MX1;BST2;ZDHHC11;AZU1;DHX58;IKBKE;RSAD2;USP44;IFIT2;TRIM32;IRF7;APOBEC3C;DDX60;IFIT1;LILRB1;RIPK3;NLRP9;STAT1;IFNAR2;TLR8;DDX60L;IFIT5;TBKBP1;IRF1;CASP1;AGBL5;MLKL;RNASE6;TRIM11;STAT2;ZNFX1;TLR3;IFIH1;RIGI…	ImmuneCells
85	GO_Biological_Process_2023__G Protein-Coupled Receptor Signaling Pathway, Coupled To Cyclic Nucleotide Second Messenger (GO:0007187)	-0.416694	-2.43497	0	0.00144051	0.104	28/43	25.78%	MTNR1A;CCL2;VIPR1;HTR1A;CHRM4;DRD4;NPY;CNR1;HTR2A;CHRM2;HTR1F;PTH1R;NPY1R;XCR1;OPRD1;HTR2B;HTR2C;CNR2;ANXA1;DRD1;HTR5A;HRH4;CHRM3;HTR1E;HRH3;CHRM1;OPRM1;LPAR3	ImmuneCells
86	GO_Biological_Process_2023__Gamma-Aminobutyric Acid Signaling Pathway (GO:0007214)	-0.536652	-2.42564	0	0.00160474	0.118	14/20	20.17%	SHISA7;GABRA6;GABRG3;GABRA1;GABRA4;GABRG2;GABRA5;GABBR2;GABRA3;GABRB3;GABRB2;GABRA2;GABRG1;GABRB1	ImmuneCells
87	GO_Biological_Process_2023__Nuclear Transport (GO:0051169)	0.386018	2.42554	0	0.0170484	0.218	35/37	53.57%	NUP210;RBM15B;NUP62;SEH1L;NUP160;NUP35;NUP58;NUP155;NDC1;NUP85;SEC13;NUP43;NUP93;NUP153;NUP107;NUP98;RSRC1;NUP133;NUP88;NUP54;AHCTF1;NUP214;XPO1;POM121;TPR;NUP205;RANBP2;ANP32A;NUP42;NUP50;NPM1;RAE1;NUP37;RANGAP1;GLE1	ImmuneCells
88	WikiPathway_2023_Human__NO cGMP PKG Mediated Neuroprotection WP4008	-0.400005	-2.42261	0	0.00161515	0.12	21/44	15.68%	GUCY1A1;ACTN2;GRIN1;GRIN2C;IL1B;GRIN2B;NPPA;CAMK2A;NOS2;CNGA1;GRIN2A;PDE3A;TNF;CAMK2B;GUCY1B1;GUCY1A2;IFNG;PDE2A;CALM1;CYCS;NEFL	ImmuneCells
89	WikiPathway_2023_Human__Mitochondrial Complex I Assembly Model OXPHOS System WP4324	-0.380915	-2.4224	0	0.0015914	0.12	37/50	44.39%	NDUFA7;NDUFB5;NDUFB11;NDUFAB1;NDUFB10;NDUFB2;NDUFC2;NDUFA13;NDUFAF3;NDUFA2;NDUFA1;NDUFB7;DMAC1;NDUFB8;NDUFV2;TMEM186;NDUFA6;NDUFA8;NDUFAF4;NDUFA3;NDUFS3;NDUFB3;NDUFB1;NDUFS5;NDUFB4;NDUFC1;DMAC2;NDUFA5;NDUFA12;NDUFAF1;NDUFS2;NDUFB9;NDUFV1;ECSIT;NDUFB6;NDUFS6;TMEM70	ImmuneCells
90	WikiPathway_2023_Human__Immune Response To Tuberculosis WP4197	0.466467	2.4129	0	0.0175662	0.233	14/22	25.22%	SOCS1;PTPN2;IFI35;IFIT3;TAP1;MX1;IFIT1;STAT1;IFNAR2;IRF1;PSMB8;STAT2;IRF9;TYK2	ImmuneCells
91	GO_Biological_Process_2023__Inflammatory Response (GO:0006954)	0.224713	2.41006	0	0.0174088	0.24	56/196	12.75%	SIGLEC1;TLR2;SLC11A1;S100A8;S100A9;ADM;CHI3L1;FPR3;MEFV;CXCL1;THBS1;AOC3;WNT5A;CXCR4;IL1RL1;FCGR2B;PTGIR;ADAM8;CXCL3;CD44;CCL8;FPR1;PTGER3;CXCL2;FUT7;CCL3;LTB4R;CCRL2;CCL5;VNN1;LTB4R2;CARD18;FPR2;F11R;GPR68;PTGFR;FOS;TAC4;CCR3;CCR7;PTGER4;AGTR1;TNFAIP6;IL2RA;CCL20;CD14;HDAC4;CXCL5;LYZ;PROK2;CD96;CEBPB;TNFSF4;AZU1;CCR5;C5AR1	ImmuneCells
92	GO_Cellular_Component_2023__Exocytic Vesicle Membrane (GO:0099501)	-0.374871	-2.40519	0	0.00191314	0.144	26/50	21.47%	MCTP2;SV2C;SLC32A1;SYT5;RAB3B;SYNGR3;UNC13A;FER1L5;SV2A;UNC13C;SYN2;SLC17A6;SYN1;RAB26;SYNPR;RPH3A;SYP;SYT2;VAMP2;SLC17A7;SYT4;GABRA2;SYT1;SV2B;SLC17A8;PTPRS	ImmuneCells
93	GO_Biological_Process_2023__Energy Derivation By Oxidation Of Organic Compounds (GO:0015980)	-0.40697	-2.40305	0.00162075	0.00190774	0.146	26/40	31.02%	PID1;COX8A;ADGRF1;MRAP2;NDUFA4;GFPT2;COX5A;CYCS;COX6A1;COX5B;ACSM1;UQCRB;CYC1;UQCR11;COX7A2;ADGRF5;COX6B1;COX7C;UQCRQ;COX6C;COX4I1;CHCHD5;UQCRC1;MT3;UQCR10;UQCRH	ImmuneCells
94	GO_Biological_Process_2023__Positive Regulation Of Defense Response (GO:0031349)	0.260948	2.40194	0	0.0180914	0.258	51/112	25.11%	IL15;TLR2;S100A8;S100A9;MEFV;CD1D;OSM;WNT5A;AIM2;PLA2G7;PLSCR1;EMILIN2;ADAM8;LGALS2;IRGM;CCL3;HYAL2;CCL5;SERPINE1;FPR2;NLRP12;IL33;IGF2BP1;IFI35;PTGER4;SH2D1B;GRPR;AGTR1;GBP5;TRADD;TNFSF4;IL23A;MAPK13;AGT;ZP3;RNF31;NFKBIZ;TLR8;NLRC4;CASP1;POLR3B;CASP4;POLR3F;GPSM3;IL17RA;LCP1;TASL;TLR3;LRSAM1;CYBA;POLR3G	ImmuneCells
95	GO_Cellular_Component_2023__Secretory Granule Membrane (GO:0030667)	0.209885	2.39915	0	0.0176077	0.262	102/256	26.64%	TLR2;SLC11A1;CLEC5A;ANPEP;IQGAP1;IGF2R;BST1;CLEC12A;SGCG;CEACAM1;LILRB3;FCGR2A;RAB44;CD93;CD36;ADAM8;SLC2A3;SIGLEC14;CD44;SYTL4;TEKT3;CR1;FPR1;MGAM;FCAR;TBC1D10C;VNN1;SIGLEC9;FPR2;DSP;IQGAP2;SIRPB1;P2RX1;ADGRG3;SELP;CHRNB4;LGALS3;CD68;SPACA3;ATP6V0C;MME;ALDH3B1;ITGAV;ITGA2B;SIGLEC5;CLEC4C;CD109;TMEM184A;ADGRE3;CD14;ATP11A;BST2;AZU1;C5AR1;HFE;PLAUR;CXCR2;IZUMO1;VAMP8;FCER1G;CD58;ADGRE5;SLC2A5;HLA-…	ImmuneCells
96	GO_Biological_Process_2023__Neurotransmitter Secretion (GO:0007269)	-0.395142	-2.39648	0	0.00197816	0.153	26/42	26.90%	CDK5;SLC32A1;UNC13A;SYT10;CPLX1;SYN2;SYN1;SNAP25;PDZD11;RAB3A;CPLX2;SNPH;RPH3A;STX1A;LIN7B;VAMP2;NRXN2;SYT1;STXBP1;PPFIA3;HRH3;RIMS2;LIN7A;NRXN1;DOC2A;RIMS1	ImmuneCells
97	GO_Cellular_Component_2023__Small Ribosomal Subunit (GO:0015935)	-0.41868	-2.39228	0	0.00203596	0.16	30/38	40.34%	RPS5;UBA52;RPS15;RPS27A;RPS26;RPS27;FAU;RPS10;RPS11;RPS4X;RPS20;RPS23;RPS7;RPS2;RPS6;RPS3A;RPS18;RPS4Y1;RPS14;RPS13;RPS25;RPS8;RPS16;RPS21;MRPS12;MRPS6;RPS3;RPS15A;RPS24;RPS28	ImmuneCells
98	GO_Molecular_Function_2023__Receptor Ligand Activity (GO:0048018)	-0.24965	-2.38986	0	0.0020291	0.161	107/228	25.92%	SST;DPP4;CRH;BDNF;NMB;GDF10;SHH;VGF;WNT7A;CSF3;EPGN;IGF1;IL19;TAFA4;GREM2;CCK;WNT7B;IGF2;FGF17;WNT4;C1QTNF12;CSPG5;FGF9;LEFTY1;VIP;GDF9;CCL4;NGF;FGF5;IL1B;SEMA3G;WNT5B;NPPC;EDN3;HSPA1A;NPPA;BMP3;BMP8A;KNG1;INHBA;IFNK;AREG;WNT10A;BMP2;GDF6;IL1A;SEMA3E;CCL24;IL11;TAFA5;F2;WNT9B;CHGB;CD70;BTC;TNF;FGF2;FGF1;ALKAL2;PTHLH;IFNG;IL17D;GDF7;SFRP2;GDNF;DAND5;KITLG;JAG1;CCL26;WNT9A;CXCL13;CLEC11A;CX3CL1;FAM…	ImmuneCells
99	GO_Biological_Process_2023__Positive Regulation Of Excitatory Postsynaptic Potential (GO:2000463)	-0.5036	-2.38892	0	0.00200168	0.161	18/22	34.93%	WNT7A;SHANK1;GRIN1;GRIN2C;GRIN2B;STX1B;GRIN2A;SHANK3;NETO1;RELN;CUX2;RIMS2;NRXN1;RIMS1;PRKCZ;NLGN3;NLGN1;DLG4	ImmuneCells
100	KEGG_2021_Human__Staphylococcus aureus infection	0.328691	2.37847	0	0.0193559	0.291	32/55	28.27%	CFB;FPR3;FCGR3A;FCGR2A;FCGR2B;HLA-DOB;FPR1;FCAR;HLA-DQB1;FPR2;FCGR1A;C1R;IL10;SELP;FCGR2C;HLA-DQA1;C5AR1;CFD;C1QC;C1QA;C1QB;ITGAL;HLA-DOA;ICAM1;C5;HLA-DPB1;C1S;HLA-DRB1;HLA-DMA;ITGB2;C2;HLA-DMB	ImmuneCells
101	MSigDB_Hallmark_2020__Oxidative Phosphorylation	-0.254819	-2.37226	0	0.00229221	0.186	130/200	46.75%	NDUFA7;ATP6V1F;SURF1;COX8A;OAT;NDUFA4;NDUFB5;SLC25A4;ATP5MC1;ATP5MC3;ATP5PF;NDUFAB1;COX5A;CYCS;NDUFB2;COX6A1;COX5B;NDUFC2;ECH1;TIMM10;IDH3G;GPX4;TOMM22;ATP5F1D;MAOB;NDUFA2;UQCRB;CYC1;NDUFA1;NDUFB7;UQCR11;LDHB;COX7A2;MRPL34;ATP5MF;MRPS15;COX6B1;NDUFB8;MDH1;COX7C;ATP5PO;UQCRFS1;NDUFV2;TIMM13;ETFB;SLC25A11;BCKDHA;SLC25A5;TIMM50;IDH3B;NDUFA6;NDUFA8;UQCRQ;MDH2;HTRA2;COX6C;ATP1B1;COX4I1;MRPL11;NDUFA3;M…	ImmuneCells
102	GO_Cellular_Component_2023__Glutamatergic Synapse (GO:0098978)	-0.325097	-2.37116	0	0.00231255	0.189	41/77	30.13%	CBLN1;WNT7A;NPTX2;ATP2B3;SHISA7;SPTB;SRCIN1;NPTXR;ADGRA1;RAC3;SLITRK2;ATP2B2;LRFN5;LRRTM3;BSN;DLGAP3;IL1RAPL2;NOS1AP;NPTX1;HRAS;LRRC4B;DRD2;CADPS;SLITRK1;NRG3;NLGN4X;CACNG5;SLITRK4;SH3GL3;ADGRL3;DLGAP1;ACTN1;SH3GL2;NELL2;DYNLL2;LRRC4C;PTPRD;PIN1;NLGN3;ARHGAP39;ACTB	ImmuneCells
103	WikiPathway_2023_Human__Type II Interferon Signaling WP619	0.398654	2.36784	0	0.0200927	0.312	19/32	25.99%	SOCS3;SOCS1;IFI6;TAP1;IRF4;PSMB9;GBP1;ISG15;IFIT2;STAT1;HLA-B;IRF1;ICAM1;STAT2;IRF8;IRF9;CYBB;EIF2AK2;CIITA	ImmuneCells
104	GO_Biological_Process_2023__Positive Regulation Of Inflammatory Response (GO:0050729)	0.272865	2.36638	0	0.0196376	0.317	41/92	23.56%	IL15;TLR2;S100A8;S100A9;MEFV;OSM;NUPR1;WNT5A;AIM2;PLA2G7;ADAM8;LGALS2;CCL3;HYAL2;SERPINE1;NLRP12;IL33;IGF2BP1;IFI35;C2CD4B;PTGER4;OSMR;AGTR1;CREB3L3;TRADD;TNFSF4;IL23A;MAPK13;AGT;VAMP8;ZP3;NFKBIZ;NLRC4;CASP1;CASP4;GPSM3;IL17RA;LCP1;RPS19;TLR3;EHHADH	ImmuneCells
105	GO_Cellular_Component_2023__Postsynaptic Density Membrane (GO:0098839)	-0.430664	-2.36629	0	0.00238219	0.195	23/34	28.94%	GRIN2C;CACNG2;CACNG7;GRIN2B;CACNG8;GRIK3;PLPPR4;GRIN2A;DLG3;GRIN3A;GRIA1;NETO1;GRIA4;CACNG3;GRIA3;GRM5;PTPRS;GRIA2;CACNG5;GRM1;GRID1;GRIK5;GRID2	ImmuneCells
106	WikiPathway_2023_Human__GPCRs Class A Rhodopsin Like WP455	-0.254754	-2.36504	0	0.00236148	0.196	86/185	23.91%	CCKBR;MTNR1A;GPR87;F2R;FFAR2;NPFFR2;P2RY13;DRD5;GALR1;SSTR3;CCR10;HTR1A;SSTR1;CX3CR1;OR2F1;GPR17;CHRM4;DRD4;FFAR1;CYSLTR1;BDKRB2;P2RY10;GPR174;MCHR1;OPRK1;CNR1;PTGER1;P2RY1;GPR27;HTR2A;OR7A17;CMKLR2;HCAR1;GPR4;ADRA1A;SSTR2;RGL4;CHRM2;HTR1F;GPR171;NPY1R;NMBR;GPR52;PTGDR;XCR1;OPRD1;HTR2B;GPR63;RHO;HTR2C;CXCR5;GPR83;CNR2;GPR12;ADORA1;HRH1;DRD1;NMUR1;NTSR2;DRD2;PTGER2;P2RY12;HTR5A;GPR37;DRD3;NMUR2;AD…	ImmuneCells
107	GO_Biological_Process_2023__Regulation Of Fatty Acid Oxidation (GO:0046320)	0.528781	2.36263	0	0.0192588	0.321	12/16	27.20%	PDK4;NR4A3;ACADL;SOX9;PPARGC1A;TYSND1;ACADVL;ABCD1;MLYCD;KLHL25;PRKAG2;PPARA	ImmuneCells
108	GO_Biological_Process_2023__Regulation Of Inflammatory Response (GO:0050727)	0.215762	2.36226	0	0.0186376	0.321	85/208	24.85%	IL15;TLR2;NOD2;S100A8;S100A9;BCL6;APOA1;MEFV;BST1;OSM;WNT5A;AIM2;PLA2G7;CD200R1;GPER1;LGALS2;IRGM;CCL3;HYAL2;CCL5;USP18;PTGS2;BIRC3;SERPINE1;ADAMTS12;FPR2;NR1H4;PTGES;ACE2;KLF4;NLRP12;CDH5;IL33;TNFAIP8L2;IL10;PTPN2;IGF2BP1;MYD88;IFI35;PTGER4;METRNL;IL1R1;NLRP11;AGTR1;SBNO2;TNFAIP6;TNFAIP3;TRADD;DAGLA;NLRP7;TNFSF4;AHR;CXCL17;NLRP4;NLRP14;IL23A;MAPK13;GBA1;AGT;PPARG;PPARD;ZP3;IL10RA;SLC39A8;GHRL;SP…	ImmuneCells
109	GO_Biological_Process_2023__Positive Regulation Of Synaptic Transmission (GO:0050806)	-0.333033	-2.36099	0	0.00243846	0.204	40/74	27.31%	CCL2;FOXM1;NFATC4;SHISA7;NMU;GRIN1;GRIN2C;CACNG2;CACNG7;GRIN2B;LGI1;CACNG8;STX1B;BAIAP3;GRIN2A;TNF;CLSTN2;SHANK3;ADCY8;DRD1;SLC24A2;VAMP2;SLC8A3;SHANK2;CACNG3;PLK2;AKAP5;RGS14;SYT1;ZDHHC12;RELN;CACNG5;RIMS2;NOL3;NRXN1;CLSTN3;RIMS1;NALCN;CCR2;PRKCZ	ImmuneCells
110	GO_Cellular_Component_2023__Specific Granule (GO:0042581)	0.238057	2.35723	0	0.0187877	0.327	60/141	26.28%	CLEC5A;BPI;LRG1;CHI3L1;CXCL1;BST1;CLEC12A;CEACAM1;CHIT1;RAB44;CD93;CD36;ADAM8;SLC2A3;FCAR;CFP;FPR2;P2RX1;ADGRG3;CHRNB4;ALDH3B1;ITGAV;FOLR3;HPSE;LYZ;ATP11A;PLAUR;ARG1;STXBP2;VAMP8;CRACR2A;SLC2A5;OSCAR;STX3;TMBIM1;DNASE1L1;CTSD;GHDC;ITGAL;RAB37;SLC44A2;KCNAB2;RAP2B;AGPAT2;PTPN6;B2M;STOM;TSPAN14;TOM1;NIT2;DNAJC5;LAIR1;CD33;TNFRSF1B;CYBA;CYBB;RAB27A;VAMP1;PDXK;ITGB2	ImmuneCells
111	KEGG_2021_Human__Morphine addiction	-0.307962	-2.3564	0	0.00259985	0.222	39/89	20.17%	GNGT1;SLC32A1;GNG3;GNG13;GABRD;KCNJ9;KCNJ6;GABRA6;GNG11;PDE8B;GABRG3;GABRA1;GABRA4;GABBR1;PDE3A;GNG4;KCNJ3;ADCY1;GABRG2;ADCY8;GNB5;PDE2A;ADORA1;GNG8;GABRA5;DRD1;GNAO1;GABBR2;PDE4D;GABRA3;GABRB3;PRKCG;ADCY5;GABRB2;PDE1C;GABRA2;GABRG1;PDE10A;GABRB1	ImmuneCells
112	GO_Biological_Process_2023__Heart Process (GO:0003015)	-0.581052	-2.34638	0	0.0027383	0.239	13/15	29.43%	RAMP3;ACTC1;TRDN;NOX4;TNNI3;SOD1;SGCZ;FYN;RANGRF;ZNHIT1;GPX1;SGCD;MYL7	ImmuneCells
113	GO_Cellular_Component_2023__Synaptic Vesicle Membrane (GO:0030672)	-0.36523	-2.34599	0	0.00271427	0.239	28/51	25.10%	MCTP2;SV2C;SLC32A1;SYT5;RAB3B;SYNGR3;UNC13A;FER1L5;SV2A;UNC13C;SYN2;SLC17A6;SYN1;RAB26;SYNPR;RPH3A;SYP;SYT2;VAMP2;SLC17A7;SYT4;GABRA2;SYT1;SV2B;SLC17A8;PTPRS;CLTB;DOC2A	ImmuneCells
114	GO_Cellular_Component_2023__Cytosolic Small Ribosomal Subunit (GO:0022627)	-0.413961	-2.34293	0	0.00282027	0.249	29/37	40.34%	RPS5;UBA52;RPS15;RPS27A;RPS26;RPS27;FAU;RPS10;RPS11;RPS4X;RPS20;RPS23;RPS7;RPS2;RPS6;RPS3A;RPS18;RPS4Y1;RPS14;RPS13;RPS25;RPS8;RPS16;RPS21;MRPS12;RPS3;RPS15A;RPS24;RPS28	ImmuneCells
115	WikiPathway_2023_Human__SARS Coronavirus And Innate Immunity WP4912	0.512712	2.34054	0.00230947	0.021018	0.364	13/16	32.81%	ACE2;IKBKE;STAT1;IFNAR2;STAT2;TLR3;IFIH1;RIGI;IRF9;TYK2;TRAF3;MAVS;IFNAR1	ImmuneCells
116	GO_Molecular_Function_2023__Cytokine Receptor Activity (GO:0004896)	0.303411	2.33999	0	0.0204809	0.364	34/67	22.66%	IL1R2;IFNLR1;IL4R;IL1RL1;CD44;IL18R1;IL11RA;IL2RG;IL21R;IL3RA;GFRA2;IL7R;FLT3;CCR3;IL17RB;IL17REL;IL1R1;OSMR;IL2RA;CCR4;PRLR;CCR5;FZD4;ACKR4;CRLF1;IL17RD;IL17RE;IL10RA;IL10RB;IFNAR2;EBI3;IL15RA;CSF2RB;IL17RA	ImmuneCells
117	GO_Biological_Process_2023__Potassium Ion Transport (GO:0006813)	-0.289167	-2.33295	0	0.0030882	0.272	59/115	27.22%	KCNA5;KCNS2;KCNK2;KCNH2;LRRC55;KCNA7;KCNG1;KCNK1;KCNJ4;KCNK3;KCNV1;KCNAB1;KCNJ6;KCNA6;KCNK12;KCNA4;KCNH4;KCNJ12;KCNS3;KCNH6;KCNB1;KCNH3;ABCC9;SLC9A2;SLC24A3;KCNG3;KCNA3;HCN1;KCNF1;KCNN1;HCN4;SLC9A4;KCNJ3;ABCC8;KCNA1;KCNMB2;KCND3;SLC24A2;KCNA2;SLC17A7;HCN2;KCNB2;KCNH5;KCNJ16;KCNQ2;KCNK15;SLC9C2;KCNC2;KCNC1;SLC9C1;KCNAB3;KCNJ11;KCND2;HPN;KCNH7;CCDC51;KCNH8;NALCN;KCNQ5	ImmuneCells
118	GO_Biological_Process_2023__Signal Release From Synapse (GO:0099643)	-0.404736	-2.33159	0	0.00309702	0.275	25/37	31.69%	CDK5;SLC32A1;UNC13A;SYT10;CPLX1;SYN2;SYN1;SNAP25;PDZD11;RAB3A;CPLX2;SNPH;STX1A;LIN7B;VAMP2;NRXN2;SYT1;STXBP1;PPFIA3;HRH3;LIN7A;NRXN1;RIMS1;PTPRN2;CPLX4	ImmuneCells
119	MSigDB_Hallmark_2020__Pancreas Beta Cells	-0.420188	-2.32689	0.00166113	0.00323949	0.287	20/33	24.98%	SST;DPP4;SCGN;PCSK1;INSM1;GCK;NEUROD1;DCX;SYT13;PCSK2;ABCC8;PAX6;HNF1A;CHGA;SLC2A2;PAK3;NKX2-2;STXBP1;PKLR;SRP14	ImmuneCells
120	GO_Biological_Process_2023__Translation (GO:0006412)	-0.242646	-2.32462	0	0.00323754	0.289	161/229	50.66%	NDUFA7;GSPT2;RPL3L;IGF2BP3;MRPL40;MRPL38;MRPL54;EEF1G;MRPL12;MRPL51;MRPL10;EEF1A2;AURKAIP1;MRPL27;MRPL28;RPL19;MRPL24;MRPL23;RPS5;MRPS33;UBA52;RPS15;MRPS17;RPL36AL;CHCHD1;GADD45GIP1;EIF5A2;MRPL55;RPS27A;MRPL17;MRPL36;MRPL9;TUFM;RPL18A;EEF1B2;RPS26;MRPL34;RPL26L1;RPS27;MRPS15;RPL26;DHPS;FAU;RPL10A;RPS10;RPLP1;RPS11;RPL41;RPL22L1;RPL24;RPS4X;RPS20;RPL23A;RPL39;MARS2;RPS23;RPLP2;RPS7;RPL13A;RPS2;RPL…	ImmuneCells
121	GO_Biological_Process_2023__Regulation Of Macrophage Derived Foam Cell Differentiation (GO:0010743)	0.426038	2.32294	0	0.0227718	0.404	17/25	28.29%	ALOX15B;PLA2G10;CD36;CETP;ITGAV;AGTR1;MSR1;AGT;PPARG;ITGB3;ABCA5;ABCG1;LCP1;PRKCH;NFKBIA;PPARA;NFKB1	ImmuneCells
122	GO_Cellular_Component_2023__Ficolin-1-Rich Granule Membrane (GO:0101003)	0.317107	2.32153	0	0.0223691	0.406	28/55	27.95%	SLC11A1;CD93;SLC2A3;SIGLEC14;CR1;FPR1;MGAM;FCAR;TBC1D10C;FPR2;DSP;LGALS3;ATP6V0C;SIGLEC5;CLEC4C;ADGRE3;FCER1G;CD58;ENPP4;CD55;ARL8A;TCIRG1;DIAPH1;ITGB2;DOK3;CD300A;NBEAL2;GAA	ImmuneCells
123	GO_Biological_Process_2023__Modulation Of Chemical Synaptic Transmission (GO:0050804)	-0.282634	-2.31932	0	0.00333157	0.3	61/120	30.03%	MCTP2;CHRNB2;CDK5;NPTX2;CX3CR1;CNTNAP4;NMU;UNC13A;IL1B;FER1L5;LGI1;CAMK2A;CPLX1;MAPK8IP2;NPTXR;GRIK3;PLPPR4;BAIAP3;SLC6A9;SYN1;TNF;SLC38A1;CLSTN2;CPLX2;GRIN3A;TPRG1L;DLGAP3;SNCAIP;GRIA1;NPTX1;GRM3;DRD2;SLC8A3;CDH2;GRIA4;GRM2;GRIA3;BEGAIN;SYT1;GRM5;NRG3;DGKI;RELN;NLGN4X;GRIA2;CACNG5;GRM8;GRM1;DLGAP1;RIMS2;NOL3;CLSTN3;GRID1;RIMS1;DYSF;GRIK5;LRRC4C;TMEM108;GRID2;CHRNA7;NLGN3	ImmuneCells
124	GO_Biological_Process_2023__Regulation Of miRNA-mediated Gene Silencing (GO:0060964)	0.551304	2.31603	0	0.0226216	0.414	15/15	44.92%	DND1;ZFP36;TRIM71;WTIP;POU5F1;PPARG;EIF4G1;LIMD1;TIAL1;DHX9;ELAVL1;PUM1;PUM2;FXR1;FMR1	ImmuneCells
125	WikiPathway_2023_Human__Host Pathogen Interaction Of Human Coronaviruses Interferon Induction WP4880	0.385928	2.3152	0	0.0222078	0.416	28/32	48.09%	FOS;OAS3;MYD88;OAS2;IKBKE;STAT1;IFNAR2;IKBKG;STAT2;IFIH1;RIGI;IRF9;TYK2;EIF2AK2;NFKBIA;NFKB1;TRAF3;MAVS;IFNAR1;CHUK;MAPK14;RIPK1;TBK1;MAP3K7;IKBKB;MAPK8;TRAF6;JAK1	ImmuneCells
126	WikiPathway_2023_Human__Vitamin D Receptor Pathway WP2877	0.239659	2.31358	0	0.0218505	0.42	45/149	11.98%	S100A8;VDR;TREM1;TNFSF11;S100A9;BCL6;THBD;TNFRSF11B;CEACAM1;CYP2D6;IL1RL1;SULT1C2;S100A4;CDKN2C;KL;SPP1;CDKN1A;MX2;TIMP3;CA9;BMP6;IGFBP5;ADRA1B;DND1;CASP5;BGLAP;MYC;CYP3A4;KLF4;STEAP4;HILPDA;GXYLT2;COLEC11;SALL4;HIF1A;HSD17B2;PTGER4;CYP2S1;IRF4;TNFAIP3;HLA-DQA1;CD14;TGFB2;ATP2C2;TNFSF4	ImmuneCells
127	WikiPathway_2023_Human__IL 4 Signaling Pathway WP395	0.333683	2.31354	0	0.0213042	0.42	39/49	44.17%	SOCS3;JAK3;SOCS1;IL4R;IL2RG;DOK2;PIK3R2;FLNA;FOS;CEBPB;STAT1;MAPK3;STAT5A;PTPN6;STAT3;SHC1;TYK2;IRS2;STAT6;NFKBIA;AKT1;NFKB1;GRB2;SOCS5;CHUK;MAPK14;STAT5B;PIK3CD;PIK3R1;GAB2;RPS6KB1;JAK2;SOS1;CBL;MAPK1;EP300;ATF2;IKBKB;PTPN11	ImmuneCells
128	GO_Molecular_Function_2023__Neuropeptide Receptor Activity (GO:0008188)	-0.44204	-2.31294	0	0.00347523	0.309	21/30	27.03%	GALR1;GAL;SSTR1;TACR2;MCHR1;SSTR2;GPR171;NPY1R;NMBR;GPR83;KISS1R;NMUR1;NTSR2;NPSR1;GPR37;NMUR2;HCRTR2;SORCS3;OPRM1;GPR143;TACR1	ImmuneCells
129	GO_Biological_Process_2023__Positive Regulation Of Transcription By RNA Polymerase III (GO:0045945)	0.524514	2.31131	0	0.0210873	0.425	15/15	47.60%	MYBBP1A;DDX21;ERCC6;ZC3H8;ELL;RPTOR;ZNF143;MTOR;CHD8;DEK;ICE2;SF3B1;BAZ1B;ICE1;SMARCA5	ImmuneCells
130	GO_Molecular_Function_2023__Potassium Channel Activity (GO:0005267)	-0.333247	-2.30995	0	0.00357306	0.319	40/71	27.34%	KCNS2;KCNK2;KCNH2;LRRC55;TMEM38A;KCNG1;KCNK1;KCNK3;KCNV1;KCNA6;KCNK12;KCNA4;KCNH4;KCNS3;GRIK3;KCNH3;ABCC9;HCN1;KCNF1;KCNN1;HCN4;KCNT1;KCNE5;KCNA1;KCNMB2;KCND3;KCNA2;HCN2;KCNH5;KCNQ2;KCNK15;KCNC2;KCNT2;KCNC1;KCNJ11;KCND2;CCDC51;KCNH8;KCNQ5;GRIK5	ImmuneCells
131	MSigDB_Hallmark_2020__Hypoxia	0.2191	2.29913	0	0.0227521	0.452	76/196	22.32%	TGFBI;ACKR3;PIM1;PLAC8;ADM;STC2;STC1;PPP1R3C;ANXA2;CA12;CXCR4;FOSL2;ANGPTL4;SLC2A3;DDIT4;SDC2;S100A4;TGM2;CDKN1A;SERPINE1;TGFB3;ISG20;HMOX1;EFNA3;SDC4;ZFP36;NDST2;GPC4;TMEM45A;SULT2B1;FOS;KDELR3;VEGFA;P4HA2;TES;ATF3;PLIN2;DUSP1;SAP30;NDST1;CCN5;TNFAIP3;PGAM2;PPARGC1A;SRPX;MT2A;LOX;EFNA1;F3;PPFIA4;BHLHE40;PLAUR;NFIL3;PFKP;ENO3;SLC2A1;SLC2A5;B4GALNT2;ANKZF1;SLC37A4;PHKG1;NDRG1;NOCT;RBPJ;LDHA;VLDLR;…	ImmuneCells
132	GO_Cellular_Component_2023__Excitatory Synapse (GO:0060076)	-0.484773	-2.29539	0	0.00420007	0.367	21/24	39.23%	ATP2B3;SHANK1;SHISA7;GRIN1;SLC17A6;BSN;ITGA3;NETO1;SLC17A7;ELFN1;AKAP5;SLC17A8;NLGN4X;GRIA2;FGFR2;NLGN3;SYT11;NLGN1;DLG4;NLGN4Y;SYNDIG1	ImmuneCells
133	GO_Biological_Process_2023__Positive Regulation Of Response To External Stimulus (GO:0032103)	0.233153	2.28989	0	0.0237302	0.479	62/142	25.50%	IL15;TLR2;S100A8;S100A9;THBD;MEFV;CD1D;OSM;THBS1;WNT5A;AIM2;PLA2G7;PLSCR1;EMILIN2;ADAM8;LGALS2;IRGM;CCL3;HYAL2;CCL5;SERPINE1;APOH;BMP6;FPR2;PDGFRB;NLRP12;IL33;IGF2BP1;IFI35;PTGER4;SH2D1B;AGTR1;VTN;GBP5;TRADD;TNFSF4;IL23A;MAPK13;AGT;SERPINF2;ZP3;STX3;SCIMP;RNF31;NFKBIZ;TLR8;NLRC4;CASP1;POLR3B;CASP4;POLR3F;GPSM3;IL17RA;LCP1;USF1;TASL;TLR3;LRSAM1;CYBA;POLR3G;LY96;PPM1F	ImmuneCells
134	GO_Molecular_Function_2023__Chemokine Binding (GO:0019956)	0.503065	2.27979	0	0.0249771	0.507	10/16	17.89%	ACKR3;CXCR4;ITGA4;ZFP36;PDPN;CCR3;PLP2;ITGAV;CCR5;ITGB3	ImmuneCells
135	GO_Cellular_Component_2023__Sarcoplasmic Reticulum Membrane (GO:0033017)	-0.452272	-2.27819	0	0.00485516	0.415	13/26	13.51%	SLN;TMEM38A;DMPK;CASQ2;JPH4;CASQ1;DHRS7C;FKBP1B;TRDN;JPH1;MRLN;JPH3;NOS1AP	ImmuneCells
136	KEGG_2021_Human__Prion disease	-0.231653	-2.27762	0	0.00482771	0.417	148/251	43.28%	CACNA1S;CREB3L1;EGR1;MAPK11;NDUFA7;CAV1;HSPA1L;CREB3L4;TUBB2A;GRIN1;NDUFA4L2;GRIN2C;IL1B;CAV2;GRIN2B;COX7A1;HSPA8;HSPA1A;TUBA4A;KIF5C;KIF5A;ITPR3;TUBB3;IL1A;COX8A;MAPK12;GRIN2A;TUBB4A;NDUFA4;TNF;NDUFB5;SLC25A4;C6;ATP5MC1;PSMA8;GRIN3A;NDUFB11;ATP5MC3;ATP5PF;TUBA1A;PSMC3;NDUFAB1;COX5A;CYCS;PIK3R3;NDUFB10;PSMD8;NDUFB2;COX6A1;SOD1;COX5B;NDUFC2;NDUFA13;ATP5F1D;NDUFA2;FYN;IL6;NCAM1;UQCRB;CYC1;NDUFA1;ND…	ImmuneCells
137	GO_Cellular_Component_2023__Asymmetric Synapse (GO:0032279)	-0.267676	-2.27444	0	0.00489066	0.426	68/131	31.93%	FOXM1;INSYN1;CDK5;ADGRB1;SHANK1;SHISA7;GRIN1;SAMD14;GRIN2B;P2RY1;MAPK8IP2;SH2D5;SRCIN1;RNF112;CACNG8;ADGRA1;GRIN2A;PPP1R9A;GAP43;IQSEC3;SHANK3;ADCY8;GRIA1;KCND3;NETO1;ADD2;ARHGAP44;SLC8A3;CDH2;CDK5R1;SHANK2;AKAP5;SHISA9;RGS14;KALRN;FYN;SPOCK1;DNAJC6;NLGN4X;GRIA2;LZTS3;LRRC7;SCRIB;CACNG5;KCND2;RPS27;MAGI2;CTNND2;HIP1R;NSMF;SIGMAR1;DLG5;RPS18;TMEM108;RPL8;RPL14;NTRK2;RPS14;RPS13;NLGN3;FABP5;RPS25;P…	ImmuneCells
138	WikiPathway_2023_Human__mRNA Processing WP411	0.242747	2.27064	0	0.0266896	0.53	117/125	66.25%	SNRPD3;CLP1;SF3A2;CSTF2;SNRPA;PTBP1;RNGTT;XRN2;SF3A3;SNRPF;PRPF4;CLK2;DHX38;HNRNPL;SNRPA1;HNRNPA1;CELF2;SUGP1;U2AF1;NONO;CPSF4;CLASRP;PRPF3;EFTUD2;YBX1;PRPF8;PRMT2;CSTF3;RBM17;PCBP2;SUGP2;SRPK1;RNMT;DHX8;SREK1;PRPF40A;SRSF1;DICER1;DHX15;SF3B3;CPSF2;NCBP1;TMED10;PRPF4B;DHX9;HNRNPM;SRSF4;HNRNPA2B1;CELF1;HNRNPD;HNRNPU;RBM39;RBM5;PAPOLA;HNRNPC;PTBP2;HNRNPR;HNRNPH1;SRPK2;SRRM1;CLK1;SFPQ;SFSWAP;SF3B1;S…	ImmuneCells
139	GO_Cellular_Component_2023__Mitochondrial Respiratory Chain Complex IV (GO:0005751)	-0.547062	-2.26683	0	0.00520272	0.451	14/16	35.93%	NDUFA4L2;COX8A;NDUFA4;COX5A;COX6A1;COX5B;COX7A2;COX6B1;COX7C;UQCRFS1;COX6C;COX4I1;COX6A2;COX7B	ImmuneCells
140	GO_Biological_Process_2023__Heart Contraction (GO:0060047)	-0.386715	-2.26679	0	0.00514853	0.451	24/38	29.43%	MYH7;KCNH2;SCN5A;CASQ2;SCN2B;SCN3B;TCAP;ACTC1;TRDN;KCNE5;TNNI3;SOD1;SGCZ;MYL4;TNNT2;RANGRF;RYR2;GPX1;TTN;SGCD;DMD;TPM1;ATP1B1;MYL7	ImmuneCells
141	GO_Biological_Process_2023__Regulation Of Microtubule Polymerization Or Depolymerization (GO:0031110)	-0.439625	-2.26568	0.0034188	0.00514292	0.451	16/27	28.43%	GAS2L2;STMND1;SKA1;CAMSAP3;FKBP4;STMN2;MAP1A;MAPT;MAP1B;ARL2;STMN4;STMN1;STMN3;MAP2;SKA3;GAS2L1	ImmuneCells
142	GO_Biological_Process_2023__Regulation Of Peptide Hormone Secretion (GO:0090276)	-0.379381	-2.26097	0	0.00529406	0.466	21/42	22.34%	KCNA5;FFAR2;GRP;HNF4A;RASL10B;IL1B;GCK;NEUROD1;GIPR;NOS2;SLC25A22;SNAP25;TNF;SYT7;HTR2C;IFNG;STX1A;IL6;ILDR1;CELA2A;KCNJ11	ImmuneCells
143	GO_Biological_Process_2023__Mitochondrial Respiratory Chain Complex I Assembly (GO:0032981)	-0.351149	-2.26035	0	0.00521888	0.469	37/53	41.99%	NDUFB5;NDUFB11;NDUFAB1;NDUFB10;NDUFB2;NDUFC2;NDUFA13;NDUFAF3;NDUFA2;NDUFA1;NDUFB7;DMAC1;NDUFB8;NDUFA11;TMEM186;NDUFA6;NDUFA8;NDUFAF4;NDUFA3;NDUFS3;NDUFB3;NDUFB1;NDUFS5;NDUFS8;NDUFB4;TMEM126A;NDUFS7;NDUFC1;DMAC2;NDUFA5;NDUFAF1;NDUFA9;NDUFS2;NDUFB9;NDUFAF8;ECSIT;NDUFB6	ImmuneCells
144	GO_Biological_Process_2023__NADH Dehydrogenase Complex Assembly (GO:0010257)	-0.351149	-2.26035	0	0.00521888	0.469	37/53	41.99%	NDUFB5;NDUFB11;NDUFAB1;NDUFB10;NDUFB2;NDUFC2;NDUFA13;NDUFAF3;NDUFA2;NDUFA1;NDUFB7;DMAC1;NDUFB8;NDUFA11;TMEM186;NDUFA6;NDUFA8;NDUFAF4;NDUFA3;NDUFS3;NDUFB3;NDUFB1;NDUFS5;NDUFS8;NDUFB4;TMEM126A;NDUFS7;NDUFC1;DMAC2;NDUFA5;NDUFAF1;NDUFA9;NDUFS2;NDUFB9;NDUFAF8;ECSIT;NDUFB6	ImmuneCells
145	GO_Biological_Process_2023__Adenylate Cyclase-Inhibiting G Protein-Coupled Receptor Signaling Pathway (GO:0007193)	-0.35811	-2.25544	0	0.00539517	0.484	29/50	25.11%	MTNR1A;CORT;HTR1A;CHRM4;DRD4;MCHR1;OPRK1;GABBR1;CHRM2;HTR1F;NPY1R;PDE2A;AKAP12;DRD2;GABBR2;P2RY12;HTR5A;GPR37;DRD3;ADCY5;ADRA2A;HRH4;AKAP5;CHRM3;HTR1E;GRM8;HRH3;CHRM1;OPRM1	ImmuneCells
146	GO_Cellular_Component_2023__Catenin Complex (GO:0016342)	-0.439758	-2.25127	0	0.00553791	0.495	20/28	32.04%	CDH13;APC2;CDH7;CDH1;CDH17;CDH4;CDH22;CDH2;CDH3;CDH11;CDHR3;CDH9;JUP;CDH12;CDH23;CDH6;CDH18;CDH10;CDH8;CDH15	ImmuneCells
147	WikiPathway_2023_Human__Oligodendrocyte Specification And Differentiation Leading To Myelin Components For CNS WP4304	-0.444816	-2.25116	0	0.00549905	0.495	23/29	35.16%	SHH;MAG;IGF1;IL1B;ASCL1;SOX8;BMP2;TNF;FGF2;OLIG2;MOG;BMP4;PLP1;OLIG1;NKX2-2;GLI2;MYT1;CNTF;SOX10;SOX6;CNP;OMG;SOX5	ImmuneCells
148	GO_Cellular_Component_2023__Specific Granule Membrane (GO:0035579)	0.26669	2.24581	0	0.0310256	0.596	38/84	26.28%	CLEC5A;BST1;CLEC12A;CEACAM1;RAB44;CD93;CD36;ADAM8;SLC2A3;FCAR;FPR2;P2RX1;ADGRG3;CHRNB4;ALDH3B1;ITGAV;ATP11A;PLAUR;VAMP8;SLC2A5;TMBIM1;ITGAL;RAB37;SLC44A2;KCNAB2;RAP2B;AGPAT2;STOM;TSPAN14;TOM1;DNAJC5;LAIR1;CD33;TNFRSF1B;CYBA;CYBB;VAMP1;ITGB2	ImmuneCells
149	WikiPathway_2023_Human__Peptide GPCRs WP24	0.310463	2.24364	0	0.0308349	0.605	24/54	14.51%	FPR3;CXCR4;MC1R;NPY2R;FPR1;FPR2;OXTR;NTSR1;TAC4;MC4R;CCR3;CCR7;TRHR;GRPR;LHCGR;EDNRB;AGTR1;CCR4;HCRTR1;CCR5;C5AR1;CXCR2;GNRHR;AVPR1A	ImmuneCells
150	WikiPathway_2023_Human__Glucocorticoid Receptor Pathway WP2880	0.291023	2.23863	0	0.0313416	0.617	28/65	19.50%	ACKR3;THBD;GADD45B;ANGPTL4;CPEB4;MGAM;SNAI2;PTGS2;BIRC3;TGFBR3;ETNK2;RGS2;TNFAIP3;CCL20;TSC22D3;NR1I3;PPP1R14C;PMP2;BHLHE40;POU5F1;MFGE8;CDC42EP3;SRGN;NFKB2;CUL1;SEC14L1;ABHD2;SLC19A2	ImmuneCells
151	GO_Biological_Process_2023__Metal Ion Transport (GO:0030001)	-0.251773	-2.23773	0	0.0061989	0.539	71/158	24.66%	SLN;KCNA5;CACNA1S;KCNS2;CHRNA4;CHRNB2;SCN5A;SLC5A4;CAV1;KCNG1;KCNK1;KCNJ4;KCNK3;KCNV1;KCNAB1;SCN3B;CACNG7;KCNJ6;NIPAL4;KCNA6;CLDN16;KCNA4;KCNH4;RAMP2;KCNJ12;ASIC1;RAMP3;CAMK2A;KCNS3;CACNG8;KCNH3;KCNA3;KCNF1;TRPC4;TUSC3;KCNN1;ATP2B2;KCNJ3;GRIN3A;TRPV6;TRPV4;KCNA1;SCNN1B;KCNMB2;KCND3;TRPC3;NMUR1;SCN2A;KCNA2;SLC17A7;SCN3A;KCNB2;SLC9B2;CACNG3;KCNJ16;NMUR2;MMGT1;FYN;SCN8A;TRPC5;SCN4A;KCNC1;KCNAB3;SCN1…	ImmuneCells
152	GO_Biological_Process_2023__Calcium Ion Transmembrane Import Into Cytosol (GO:0097553)	-0.308016	-2.23684	0	0.00622026	0.543	36/78	22.10%	CACNA1S;CACNA1G;F2R;SCN5A;SCN10A;GRIN1;GRIN2C;PLCH2;GRIN2B;JPH4;HTR2A;LCK;CACNA1H;GRIN2A;PLCB4;FGF2;HTR2B;JPH1;CACNA1I;HTR2C;TRPV6;JPH3;PLCB1;TRPV4;PLCH1;SLC24A2;DRD2;SCN2A;SLC8A3;SCN3A;JPH2;SCN8A;SCN4A;SCN1A;CACNA1E;TRPM1	ImmuneCells
153	GO_Biological_Process_2023__Response To Type II Interferon (GO:0034341)	0.286828	2.23584	0	0.0312366	0.626	33/60	28.96%	TLR2;SLC11A1;GBP2;MEFV;WNT5A;CCL8;IFITM2;CCL3;CCL5;IFITM3;GBP1;DAPK1;TRIM21;CCL20;AQP4;GBP5;BST2;GBP6;GCH1;CD58;STAT1;CASP1;LGALS9;GBP4;CXCL16;SP100;IRF8;PDE12;CIITA;KYNU;CALCOCO2;SYNCRIP;SHFL	ImmuneCells
154	GO_Biological_Process_2023__Associative Learning (GO:0008306)	-0.506819	-2.23454	0	0.00627019	0.551	11/18	18.53%	CHRNB2;SHANK1;GRIN1;MAP1A;DRD1;NETO1;DRD2;BRSK1;DRD3;RGS14;SLC6A1	ImmuneCells
155	GO_Biological_Process_2023__Regulation Of Innate Immune Response (GO:0045088)	0.268884	2.23281	0.00263852	0.0313841	0.637	57/76	46.33%	FGR;CD1D;PLSCR1;FCGR2B;ADAM8;AURKB;PARP9;CCL5;BIRC3;FPR2;PTPN22;IFI35;SH2D1B;TRIM21;TNFAIP3;GBP5;CACTIN;DHX58;ZDHHC18;LYAR;PTPN1;TLR8;IRF1;PTPN6;POLR3B;POLR3F;LRP8;TASL;HLA-E;POLR3G;AKT1;IRAK3;MUL1;RNF135;CASP8;TRIM56;SLC15A4;POLR3C;TRAFD1;SAMHD1;PCBP2;RNF185;ATG5;IFI16;APPL1;XIAP;PRKDC;BIRC2;DHX9;RIOK3;N4BP1;PTPN11;NFE2L2;ATG12;APLP2;CEP63;PPP6C	ImmuneCells
156	KEGG_2021_Human__Dopaminergic synapse	-0.268449	-2.22917	0	0.00660609	0.575	51/126	24.91%	CREB3L1;GNGT1;MAPK11;DRD5;LRTOMT;CREB3L4;GNG3;GNG13;DRD4;KCNJ9;KCNJ6;GRIN2B;GNG11;CAMK2A;CALML4;KIF5C;KIF5A;ITPR3;MAPK12;GRIN2A;CALY;PLCB4;CAMK2B;GNG4;PPP2R2C;KCNJ3;PLCB1;GNB5;GNG8;CALM1;GRIA1;DRD1;GNAO1;CALM3;GNAL;DRD2;GRIA4;DRD3;PRKCG;ADCY5;GRIA3;MAOB;GRIA2;SCN1A;PPP2R5B;GNB3;GSK3A;CREB3;PPP2CA;GNG10;CALM2	ImmuneCells
157	GO_Molecular_Function_2023__Nuclear Receptor Coactivator Activity (GO:0030374)	0.316927	2.2243	0	0.0327425	0.658	49/50	65.17%	HELZ2;SOX9;TRERF1;PPARGC1A;PPRC1;PSMC3IP;MED22;DCAF6;CARM1;ACTN4;ZMIZ2;PPARGC1B;WDR77;PKN1;ZMIZ1;MED1;RNF4;CNOT9;THRAP3;MED4;NCOA3;MED14;CCAR1;NCOA6;NCOA1;TACC1;MED13;TMF1;NCOA2;KDM1A;CNOT6;SS18;PRKCB;USP22;NCOA7;RBM14;MED17;BRD8;MED30;ENY2;CCDC62;HMGA1;SFR1;ATXN7L3;MED12;ELK1;ETS1;BUD31;CALCOCO1	ImmuneCells
158	GO_Biological_Process_2023__Synaptic Transmission, Glutamatergic (GO:0035249)	-0.426146	-2.22409	0	0.00683628	0.59	18/27	28.94%	GRIN2C;UNC13A;GRIN2B;UNC13C;GRIK3;SLC17A6;GRIN2A;GRIN3A;GRIA1;SLC17A7;GRIA4;GRIA3;CDHR3;SLC17A8;GRIA2;GRID1;GRIK5;GRID2	ImmuneCells
159	GO_Biological_Process_2023__Response To Ethanol (GO:0045471)	-0.522358	-2.22343	0.00357143	0.00681581	0.593	15/17	38.92%	CHRNB2;DRD4;GRIN1;GRIN2B;GRIN2A;GRIN3A;DRD2;SOD1;DRD3;GLRA2;OPRM1;GLRA1;ADH6;TH;GOT2	ImmuneCells
160	GO_Cellular_Component_2023__Polysomal Ribosome (GO:0042788)	-0.422969	-2.22073	0	0.0069213	0.601	21/28	40.34%	RPL19;RPL36AL;RPL18A;RPS26;RPL10A;RPL41;RPL24;RPL39;RPS23;RPL7A;RPL32;RPL8;NR0B1;RPL11;RPL38;RPL36;RPS21;RPL6;RPL18;RPL30;RPS28	ImmuneCells
161	GO_Biological_Process_2023__Regulation Of Neuron Projection Development (GO:0010975)	-0.240867	-2.21381	0	0.007419	0.619	72/172	26.23%	LTK;BDNF;MAG;CDK5;KNDC1;EFNB2;FKBP4;PLXNB3;SRCIN1;STMN2;PTK7;NTNG1;STX1B;EFHC2;NOVA2;KIF1A;RET;CAMK1;BRSK2;TENM3;RIT2;CAMK2B;ALKAL2;GFI1;NDRG4;ZNF365;TNR;NTRK1;SHANK3;CRMP1;TRPV4;RTN4RL2;PLPPR5;RTN4R;CHN1;CX3CL1;TBR1;DBN1;ARHGAP44;EPHA4;DPYSL3;BRSK1;CDH2;CDK5R1;TNN;FUT9;PAK3;RAB17;RELN;NCS1;SPOCK1;MARK1;SEZ6;CSMD3;PTPRS;LZTS3;LRRC7;NTRK3;MDK;FES;ITM2C;SERPINI1;GSK3A;MAGI2;NOL3;GPC2;MBOAT1;EPHB3;M…	ImmuneCells
162	GO_Biological_Process_2023__Regulation Of Insulin Secretion (GO:0050796)	-0.302022	-2.21202	0	0.00748295	0.625	35/79	22.34%	KCNA5;BLK;HNF4A;FFAR1;SLC30A8;IL1B;GCK;BMP8A;NNAT;NEUROD1;GIPR;NOS2;KCNB1;SLC25A22;BRSK2;SNAP25;TNF;SYT7;IRS1;NR1D1;IFNG;EPHA5;STX1A;ADCY8;ABCA12;FAM3D;CHGA;CCN3;EFNA5;ADCY5;ADRA2A;LRP5;IL6;CELA2A;KCNJ11	ImmuneCells
163	WikiPathway_2023_Human__Splicing Factor NOVA Regulated Synaptic Proteins WP4148	-0.373476	-2.20725	0	0.00771558	0.641	18/41	19.12%	CADM3;GRIN1;CAV2;KCNJ6;GRIN2B;EPB41L1;NTNG1;ANK3;PLCB4;RAP1GAP;GABRG2;CHL1;NCDN;GABBR2;CDH2;EFNA5;MAPK4;KCNQ2	ImmuneCells
164	KEGG_2021_Human__Complement and coagulation cascades	0.287642	2.20658	0	0.0364352	0.705	30/68	19.81%	CFB;F13A1;THBD;VSIG4;F11;C7;F5;CR1;SERPINA1;TFPI;SERPINE1;F10;SERPINC1;C1R;CPB2;CR1L;VTN;F2RL3;C5AR1;F3;CFD;PLAUR;SERPINF2;C1QC;C1QA;SERPING1;C1QB;CFHR1;PROS1;CD55	ImmuneCells
165	WikiPathway_2023_Human__Oxidative Damage Response WP3941	0.339659	2.20465	0	0.036138	0.705	27/40	34.08%	CDKN1A;C1R;BAK1;C5AR1;MAPK13;C1QC;C1QA;NFKBIE;C1QB;MAPK10;PCNA;MAP3K9;C5;C1S;TNFRSF1B;TRAF1;TNK2;CASP9;C2;NFKB1;BCL2;BAG4;TRAF3;CDKN1B;CDC42;C3AR1;TDP2	ImmuneCells
166	GO_Biological_Process_2023__Nuclear-Transcribed mRNA Catabolic Process (GO:0000956)	0.262395	2.2032	0	0.0357496	0.709	75/84	58.00%	PNLDC1;ZFP36;ZC3H12A;EXOSC4;TNKS1BP1;PATL2;CNOT3;MAGOHB;EXOSC9;PDE12;ZC3H12D;XRN2;SAMD4A;DCPS;SMG5;DHX34;DCP1B;ERI1;MTPAP;NBDY;GSPT1;EXOSC10;XRN1;CTIF;CNOT8;DIS3L2;PYM1;TUT7;TENT4B;EIF3E;CNOT10;CNOT9;CNOT2;EXOSC7;NBAS;NCBP1;THRAP3;DCP1A;TUT4;DCP2;TENT2;UPF2;SMG1;CNOT4;RC3H1;DDX5;CNOT1;SMG6;HBS1L;CSDE1;UPF1;SMG7;PARN;RC3H2;CNOT6;CNOT6L;PATL1;SAMD4B;UPF3B;ATM;UPF3A;MAGOH;CNOT11;NCBP2;SMG9;PNRC2;RNP…	ImmuneCells
167	GO_Biological_Process_2023__Potassium Ion Transmembrane Transport (GO:0071805)	-0.267466	-2.20018	0	0.00815955	0.665	56/127	22.54%	KCNA5;KCNS2;KCNK2;KCNH2;LRRC55;KCNA7;KCNG1;ATP4A;KCNK1;KCNJ4;ATP12A;KCNK3;KCNV1;KCNJ9;KCNJ6;KCNA6;KCNK12;KCNA4;KCNH4;KCNJ12;ATP1A3;KCNS3;KCNH6;KCNB1;KCNH3;ABCC9;SLC9A2;SLC24A3;KCNG3;KCNA3;HCN1;KCNF1;KCNN1;HCN4;KCNE5;SLC9A4;KCNJ3;ABCC8;SLC12A5;KCNA1;KCND3;SLC24A2;KCNA2;HCN2;KCNB2;KCNH5;KCNJ16;KCNQ2;KCNK15;SLC9C2;KCNC2;KCNT2;KCNC1;SLC9C1;KCNJ11;KCND2	ImmuneCells
168	WikiPathway_2023_Human__GDNF RET Signaling Axis WP4830	-0.489009	-2.1977	0	0.00826212	0.672	13/20	21.96%	GFRA1;SLIT2;FOXC1;GATA3;SOX11;SOX17;RET;GDNF;FAT4;BMP4;ROBO2;GREM1;SPRY1	ImmuneCells
169	GO_Molecular_Function_2023__Serotonin Receptor Activity (GO:0099589)	-0.462118	-2.19598	0	0.0082769	0.673	16/24	23.55%	HTR3B;HTR1A;CHRM4;DRD4;HTR3E;HTR2A;CHRM2;HTR1F;HTR2B;HTR3C;HTR2C;HTR5A;HRH4;CHRM3;HTR1E;HRH3	ImmuneCells
170	GO_Biological_Process_2023__Positive Regulation Of Innate Immune Response (GO:0045089)	0.3269	2.19265	0	0.0375817	0.735	27/43	33.90%	NLRC5;CD1D;WNT5A;TRIM6;PLSCR1;CCL5;FPR2;IGF2BP1;IFI35;SH2D1B;GBP5;IKBKE;TLR8;POLR3B;POLR3F;RPS19;TASL;EHHADH;HLA-E;POLR3G;RBM47;TRIM62;TRIM56;MAVS;SLC15A4;POLR3C;SPI1	ImmuneCells
171	GO_Biological_Process_2023__Regulation Of Neurotransmitter Receptor Activity (GO:0099601)	-0.37095	-2.19237	0	0.00846855	0.687	22/40	25.11%	CRH;NPTX2;SHANK1;SHISA7;CACNG2;CACNG7;PRRT1;MAPK8IP2;NPTXR;CACNG8;LYNX1;DLGAP3;NPTX1;NETO1;CACNG3;SHISA9;BEGAIN;RELN;CACNG5;DLGAP1;PSCA;OPRM1	ImmuneCells
172	GO_Cellular_Component_2023__Tertiary Granule (GO:0070820)	0.218174	2.19206	0	0.0370337	0.736	61/146	26.64%	SLC11A1;CLEC5A;LRG1;CXCL1;CLEC12A;CEACAM1;CHIT1;CD93;ADAM8;SLC2A3;SIGLEC14;CR1;FPR1;MGAM;FCAR;TBC1D10C;CFP;FPR2;DSP;CHRNB4;LGALS3;ATP6V0C;FOLR3;TNFAIP6;SIGLEC5;CLEC4C;ADGRE3;LYZ;ATP11A;STXBP2;VAMP8;FCER1G;CD58;OSCAR;CTSD;ENPP4;FTH1;CD55;KCNAB2;RAP2B;PTPN6;ARL8A;B2M;STOM;TSPAN14;TCIRG1;NIT2;LAIR1;CD33;ASAH1;PGM1;IDH1;CYBA;CYBB;DIAPH1;VAMP1;ITGB2;DOK3;CD300A;DBNL;NBEAL2	ImmuneCells
173	GO_Molecular_Function_2023__Calcium Ion Binding (GO:0005509)	-0.214299	-2.18806	0	0.00870898	0.7	157/291	37.26%	MCTP2;ANXA9;CDH13;TCHH;SHH;PLA2G5;SCGN;SYT5;AIF1L;CALB1;CD320;NAALADL1;MYL9;SLIT2;PLSCR4;VIL1;CASQ2;GRIN1;PRF1;FBLN1;CABCOCO1;PRSS3;CLXN;SYT9;ESYT3;DNER;FER1L5;SNCB;CPNE6;SYT10;PCP4;CASQ1;CALML4;DSG3;SYT13;RET;BAIAP3;SYT3;CDH7;CDH1;CALB2;TUBB4A;KCNIP3;ITIH1;RASGRP1;BCL2L10;SYT7;ANXA6;RPH3A;DSC1;CDH17;SLC25A23;CDH4;HPCAL4;NDUFAB1;CALM1;ANXA1;CALM3;CDH22;SYT2;MASP1;CDH2;CDK5R1;AOC1;SPOCK2;CDH3;PLA2…	ImmuneCells
174	GO_Biological_Process_2023__Peptide Cross-Linking (GO:0018149)	0.460846	2.18556	0.00228833	0.0383435	0.756	8/18	5.71%	CSTA;F13A1;THBS1;TGM1;TGM2;EVPL;NDNF;DSP	ImmuneCells
175	GO_Molecular_Function_2023__GABA Receptor Activity (GO:0016917)	-0.469295	-2.183	0	0.0091066	0.718	14/21	20.17%	GABRD;GABRA6;GABRG3;GABRA1;GABRA4;GABRG2;GABRA5;GABBR2;GABRA3;GABRB3;GABRB2;GABRA2;GABRG1;GABRB1	ImmuneCells
176	GO_Biological_Process_2023__Fc-epsilon Receptor Signaling Pathway (GO:0038095)	0.433355	2.18173	0.00469484	0.0387998	0.763	21/21	56.72%	VAV3;NR4A3;FCER1G;MAPK10;MAP2K7;LYN;MAP3K1;MAP3K7;SOS1;MAP2K4;SYK;IKBKB;FER;MAPK8;MAPK9;TRAF6;VAV1;VAV2;PLCG2;PLCG1;PRKCQ	ImmuneCells
177	GO_Biological_Process_2023__Female Gamete Generation (GO:0007292)	-0.429405	-2.18124	0	0.00918421	0.722	19/26	39.96%	NANOS1;GDF9;HROB;NANOS3;M1AP;TRIP13;DMC1;MDK;FMN2;MEIOSIN;PTN;MEI4;FSHR;MCM8;PRDM9;IHO1;HORMAD1;TOB2;PIWIL2	ImmuneCells
178	GO_Biological_Process_2023__Myelination (GO:0042552)	-0.353456	-2.18092	0	0.00913368	0.722	25/47	24.96%	MALL;TNFRSF21;BCAS1;HES5;AMIGO1;TPPP;GPC1;ACSBG1;CNTNAP1;MAL2;CMTM8;ADGRG6;GAL3ST1;ABCD2;SCN2A;SLC8A3;PLP1;B4GALT6;MARVELD1;KLK6;SCN8A;MPZ;MAL;NFASC;SOX10	ImmuneCells
179	GO_Biological_Process_2023__Memory (GO:0007613)	-0.330182	-2.17797	0	0.00931673	0.729	24/56	18.53%	BDNF;CHRNB2;CALB1;NFATC4;SHANK1;SHISA7;NGF;LDLR;CAMK2N1;CAMK4;MAP1A;SHANK3;ADCY8;PLCB1;MAPT;NETO1;SCN2A;SLC8A3;SLC2A4;LRRC66;RASGRF1;PLK2;RGS14;SLC6A1	ImmuneCells
180	GO_Molecular_Function_2023__Transmitter-Gated Monoatomic Ion Channel Activity Involved In Regulation Of Postsynaptic Membrane Potential (GO:1904315)	-0.40151	-2.17663	0	0.00939074	0.735	22/32	30.70%	CHRNA4;CHRNB2;GRIN2C;GRIN2B;GRIK3;GRIN2A;GRIN3A;GRIA1;CHRNA2;CHRNB3;GRIA4;GRIA3;GABRA2;CHRNA5;GRIA2;CHRNA6;GRID1;GRIK5;CHRNA9;GRID2;CHRNA7;CHRNA10	ImmuneCells
181	WikiPathway_2023_Human__Overview Of Proinflammatory And Profibrotic Mediators WP5095	0.281366	2.17586	0	0.0397081	0.779	25/64	13.28%	IL15;CXCL1;OSM;LIF;CXCL3;CCL8;IL27;CXCL2;CCL3;SPP1;CCL5;IL17B;TNFSF13B;IL7;IL33;IL10;VEGFA;IL1RN;EPO;CCL20;CXCL5;IL5;CXCL17;IL23A;TNFSF13	ImmuneCells
182	GO_Biological_Process_2023__Neutrophil Chemotaxis (GO:0030593)	0.330056	2.1747	0	0.039368	0.785	17/43	14.93%	S100A8;TREM1;S100A9;CXCL1;EDN1;CXCL3;CCL8;CXCL2;CCL3;CCL5;KLF5;LGALS3;CCL20;CXCL5;TGFB2;CXCR2;FCER1G	ImmuneCells
183	GO_Biological_Process_2023__Axon Guidance (GO:0007411)	-0.249703	-2.17126	0	0.00980397	0.753	66/144	26.96%	BDNF;SHH;EFNB3;SLIT2;BOC;UNC5A;NOTCH3;RNF165;SEMA3G;LGI1;EFNA2;ARHGEF25;EFNB2;PLXNB3;KIF5C;EPHA10;LRTM2;KIF5A;ROBO4;TUBB3;SEMA3E;CYFIP2;RET;NFIB;L1CAM;NELL1;RAC3;GAP43;TNR;EPHA5;GDNF;NTN1;CHN1;LRTM1;EPHA4;SEMA5A;CXCL12;DPYSL5;CDK5R1;EFNA5;SEMA3C;FEZ1;ENAH;KALRN;GLI2;FYN;SEMA3D;ROBO2;RELN;NCAM1;SEMA3B;SMO;CNTN5;RPS6KA5;NFASC;CNTN4;EPHB6;EPHA7;DSCAM;NRXN1;NRXN3;CNTN1;EPHB3;EPHA3;NELL2;NRCAM	ImmuneCells
184	GO_Biological_Process_2023__Negative Regulation Of Innate Immune Response (GO:0045824)	0.317652	2.16152	0	0.0423168	0.809	19/49	18.40%	SLAMF8;NLRC5;VSIG4;AURKB;CR1;DCST1;USP18;PTPN2;OAS3;TRIM21;TNFAIP3;ISG15;CACTIN;SUSD4;DHX58;ZDHHC18;LYAR;SERPING1;TTLL12	ImmuneCells
185	GO_Biological_Process_2023__Regulation Of Natural Killer Cell Mediated Cytotoxicity (GO:0042269)	0.368309	2.15586	0	0.0433691	0.825	17/29	24.57%	KIR2DL4;SLAMF6;KLRC1;KLRD1;NCR1;KLRC2;KLRC4;CRTAM;CADM1;KLRB1;PVR;NECTIN2;LILRB1;LGALS9;HLA-F;HLA-E;CD226	ImmuneCells
186	GO_Cellular_Component_2023__Proton-Transporting ATP Synthase Complex (GO:0045259)	-0.507072	-2.15525	0.00165563	0.0109519	0.791	16/17	46.16%	ATP5MGL;ATP5MC1;ATP5MC3;ATP5PF;ATP5MJ;ATP5F1D;ATP5MF;ATP5PO;ATP5PD;ATP5F1E;ATP5MK;ATP5ME;ATP5F1B;ATP5MG;ATP5MC2;ATP5PB	ImmuneCells
187	GO_Cellular_Component_2023__Mitochondrial Proton-Transporting ATP Synthase Complex (GO:0005753)	-0.507072	-2.15525	0.00165563	0.0109519	0.791	16/17	46.16%	ATP5MGL;ATP5MC1;ATP5MC3;ATP5PF;ATP5MJ;ATP5F1D;ATP5MF;ATP5PO;ATP5PD;ATP5F1E;ATP5MK;ATP5ME;ATP5F1B;ATP5MG;ATP5MC2;ATP5PB	ImmuneCells
188	GO_Biological_Process_2023__Neuron Differentiation (GO:0030182)	-0.250192	-2.15524	0	0.0108656	0.791	76/140	35.80%	CTF1;SPINK5;SHH;EPOP;CDK5;LHX6;WNT7A;ATOH7;WNT7B;WNT4;VAX1;INSM1;VXN;MET;WNT5B;SOX11;ASCL1;NEUROD1;VAX2;INHBA;RNF112;WNT10A;ALK;NOVA2;EMX1;WNT9B;LHX4;EMX2;BRSK2;TENM3;MYT1L;INSM2;ATP2B2;EPHA5;SNPH;LMX1B;PBX1;RORB;PAX6;WNT9A;FZD3;TENM1;BRSK1;CDK5R1;FUT9;NGRN;BRINP3;GLI2;NR4A2;SPOCK1;NLGN4X;POU3F2;ITM2C;ATP8A2;ERBB4;BHLHE22;DMD;WNT16;PTPRD;WNT6;NTRK2;ERBB2;PIN1;FZD1;TENM2;SALL1;RTN1;IRX3;ERCC2;WNT1…	ImmuneCells
189	GO_Cellular_Component_2023__GABA-ergic Synapse (GO:0098982)	-0.485129	-2.15386	0	0.0108947	0.792	16/19	39.62%	ATP2B3;CBLN4;SLITRK2;ATP2B2;LRFN5;BSN;MDGA1;LRRTM2;LRRTM1;SLITRK3;SLITRK1;NLGN4X;NLGN3;NLGN1;NLGN4Y;PCLO	ImmuneCells
190	WikiPathway_2023_Human__Network Map Of SARS CoV 2 Signaling Pathway WP5115	0.205594	2.15261	0	0.0438188	0.832	76/188	24.57%	CD163;IL1R2;CFB;LRG1;IFI44L;APOA1;CXCL1;CXCL3;CCL8;DDIT4;CXCL2;CCL3;CCL5;PTGS2;IFI27;SERPINE1;CDK1;APOH;IFITM3;CFP;COL7A1;CASP5;BIRC5;IL7;RRM2;ACE2;C1R;IL33;IL10;FOS;SELP;MYD88;HIF1A;OAS2;IFI6;APOL1;DUSP1;LGALS3BP;CCL20;CD14;MX1;CXCL5;CEBPB;BST2;AHR;IL5;APOC1;CCR5;TP53I3;CXCR2;AGT;CD247;ITIH4;NFKB2;ITIH3;IFIT1;CTSD;GTSE1;STAT1;GP1BA;CTSB;IKBKG;PTPN6;BTN3A1;VPS11;VPS18;IRAK1;STEAP3;EIF4EBP1;AKT1S1…	ImmuneCells
191	GO_Biological_Process_2023__Nucleocytoplasmic Transport (GO:0006913)	0.313908	2.15243	0	0.0431342	0.832	45/48	58.46%	NUP210;RBM15B;CDAN1;LSG1;NUP62;SEH1L;NUP160;NUP35;HNRNPA1;CDKN1B;NUP58;UBE2I;NUP155;NDC1;NUP85;SEC13;NUP43;NUP93;NUP153;NUP107;NUP98;RSRC1;ATXN1;NUP133;NUP88;NUP54;AHCTF1;NEMF;NUP214;XPO1;POM121;TPR;NUP205;RANBP2;ANP32A;NUP42;NUP50;MALT1;NPM1;RAE1;NUP37;RANGAP1;GLE1;HTATIP2;NUP188	ImmuneCells
192	KEGG_2021_Human__Epstein-Barr virus infection	0.208736	2.15142	0	0.0427463	0.835	83/182	29.89%	TLR2;JAK3;GADD45B;CD44;HLA-DOB;CDKN1A;HLA-DQB1;PIK3R2;MYC;E2F2;RUNX3;OAS3;MYD88;OAS2;TAP1;E2F1;SAP30;TNFAIP3;HLA-DQA1;ISG15;BAK1;TRADD;FCER2;MAPK13;CDK4;IKBKE;CDK2;CD247;RELB;CD58;CCND3;IRF7;NFKB2;VIM;NFKBIB;GADD45G;HLA-C;NFKBIE;RBPJ;MAPK10;STAT1;HLA-B;ITGAL;IFNAR2;FAS;IKBKG;TAP2;HLA-DOA;ICAM1;HLA-A;B2M;IRAK1;STAT2;PSMD14;CCND1;HLA-F;MAP2K3;HLA-DPB1;HLA-E;HLA-DRB1;STAT3;RB1;IRF9;HLA-DMA;TYK2;BAX;…	ImmuneCells
193	GO_Cellular_Component_2023__Ribosome (GO:0005840)	-0.324725	-2.15081	0	0.0111077	0.8	39/59	40.34%	RPL3L;RPL19;RPS5;RPL36AL;RPL18A;RPS26;RPS27;RPL10A;RPS10;RPS11;RPL41;RPL24;RPS4X;RPL39;RPS23;RPS7;RPL13A;RPL7A;MRPS7;RPL15;RPL27;RPL32;RPS18;RPL8;NR0B1;RPS13;RPL11;RPS25;RPL38;RPL36;RPS21;RPL6;MRPS12;RPL18;RPS3;RPL9;RPL30;BTF3;RPS28	ImmuneCells
194	GO_Biological_Process_2023__Mitochondrial Respiratory Chain Complex Assembly (GO:0033108)	-0.288128	-2.14877	0	0.0112348	0.806	66/87	52.10%	SURF1;COX16;COX14;NDUFB5;COA3;SDHAF2;NDUFB11;NDUFAB1;PET117;NDUFB10;NDUFB2;NDUFC2;NDUFA13;NDUFAF3;NDUFA2;SDHAF1;NDUFA1;NDUFB7;DMAC1;NDUFB8;UQCC3;CHCHD4;UQCRFS1;NDUFA11;TMEM223;TMEM186;NDUFA6;NDUFA8;NDUFAF4;PET100;NDUFA3;FASTKD3;NDUFS3;NDUFB3;NDUFB1;NDUFS5;NDUFS8;NDUFB4;TMEM126A;NDUFS7;NDUFC1;UQCC2;DMAC2;NDUFA5;NDUFAF1;NDUFA9;NDUFS2;NDUFB9;SDHAF4;NDUFAF8;ECSIT;NDUFB6;COA5;SAMM50;COX17;TIMM21;LYRM2…	ImmuneCells
195	GO_Cellular_Component_2023__Mitochondrial Inner Membrane (GO:0005743)	-0.203951	-2.14516	0	0.011524	0.815	212/356	45.54%	ALAS2;CYP24A1;NDUFA7;SLC25A18;GCAT;MRPL40;CYP1A1;MRPL38;MRPL54;MRPL12;SLC25A22;COX8A;CKMT1A;COX16;ATP5MGL;TMEM160;NDUFA4;NDUFB5;COA3;MRPL51;SLC25A4;ATP5MC1;MRPL10;NDUFB11;ATP5MC3;AURKAIP1;ATP5PF;PDE2A;NDUFAB1;COX5A;CYCS;MICOS13;MRPL27;MRPL28;SLC25A29;NDUFB10;MRPL24;NDUFB2;COX6A1;SLC30A2;HIGD1A;SLC25A10;MRPL23;SMDT1;COX5B;NDUFC2;PLA2G4B;SLC9B2;MRPS33;TIMM10;CKMT2;MRPS17;PAM16;CHCHD1;ENDOG;GADD45GI…	ImmuneCells
196	WikiPathway_2023_Human__Common Pathways Underlying Drug Addiction WP2636	-0.365635	-2.14005	0.00330579	0.0120239	0.836	19/40	22.62%	DRD4;GRIN1;CAMK2A;CAMK4;PPP1R1A;GRIN2A;ADCY1;ADCY8;CALM1;GRIA1;DRD1;DRD2;ACTG2;GRIA4;PRKCG;GRIA3;GRM5;GRIA2;GRM1	ImmuneCells
197	KEGG_2021_Human__Leishmaniasis	0.276652	2.13993	0	0.0459011	0.854	36/71	28.29%	TLR2;FCGR3A;FCGR2A;HLA-DOB;ITGA4;CR1;PTGS2;HLA-DQB1;TGFB3;FCGR1A;IL10;FOS;FCGR2C;MYD88;CR1L;HLA-DQA1;TGFB2;MAPK13;NFKBIB;STAT1;MAPK3;HLA-DOA;PTPN6;IRAK1;HLA-DPB1;NCF4;EEF1A1;HLA-DRB1;CYBA;HLA-DMA;CYBB;NCF2;ITGB2;NFKBIA;HLA-DMB;NFKB1	ImmuneCells
198	GO_Biological_Process_2023__Histone Modification (GO:0016570)	0.258125	2.13974	0	0.0452572	0.854	73/80	62.26%	AURKB;CPA4;AURKC;HDAC4;SIRT6;HDAC11;MTA2;MTA1;CARM1;TAF6L;ACTL6A;HDAC6;CHD4;MBD3;JADE3;TAF12;HDAC1;TAF5L;GATAD2A;TADA3;YEATS4;TADA2A;HDAC3;YEATS2;USP3;SUPT3H;KAT2B;EP400;TRRAP;PHF20L1;MIER1;MBTD1;TBL1XR1;MBD2;CREBBP;EPC1;MTA3;EP300;EPC2;MSL3;RBBP4;GATAD2B;HDAC2;HDAC8;KAT7;MORF4L1;RBBP7;ING3;UBE2B;UBE2A;UBE2N;KAT14;SIRT2;ING5;SUDS3;BRD8;MIER2;TAF9;SIRT1;JADE1;HDAC5;ENY2;RUVBL1;BRMS1L;TAF10;MEAF6;M…	ImmuneCells
199	GO_Biological_Process_2023__Cell Morphogenesis Involved In Neuron Differentiation (GO:0048667)	-0.301164	-2.13916	0	0.0120316	0.838	38/74	30.02%	CDK5;WNT7A;ADGRB1;CCK;NEFH;MAPK8IP2;NTNG1;CDHR1;PLPPR4;ANK3;BRSK2;RAB3A;SLITRK2;MAP1A;LLGL1;SSNA1;DRD2;BRSK1;MAP1B;SLITRK5;PAK3;SLITRK3;SLITRK1;S100A6;DCDC2;TRIM46;CELSR2;SLITRK4;APBB1;FGFR2;CNTN4;APLP1;NTNG2;MAP2;NRCAM;PARD6B;PAX2;MAP6	ImmuneCells
200	GO_Biological_Process_2023__miRNA Metabolic Process (GO:0010586)	0.483243	2.13254	0.00238095	0.0468222	0.865	14/15	43.46%	ZC3H12A;LIN28A;TRIM71;SND1;KHSRP;XPO5;DIS3L2;TUT7;TENT4B;DICER1;TUT4;DDX17;DDX5;PARN	ImmuneCells
201	GO_Biological_Process_2023__Keratinocyte Differentiation (GO:0030216)	0.364628	2.13146	0	0.0464834	0.866	18/32	26.61%	ST14;CSTA;SCEL;WNT5A;TGM1;EPHA2;EVPL;CLIC4;DSP;CDSN;AKR1C3;UGCG;POU2F3;TXNIP;ASAH1;OPN3;BCR;ADAM9	ImmuneCells
202	GO_Biological_Process_2023__Cell-Cell Junction Assembly (GO:0007043)	-0.305349	-2.13134	0.0015949	0.0127837	0.854	38/69	32.10%	CDH13;GJC1;GJD3;CLDN11;RAMP2;GJA5;CDH7;CDH1;CNTNAP1;MPDZ;CDH17;TRPV4;CDH4;ARVCF;CDH22;CDH2;CDH3;CDH11;CDHR3;CDH9;JUP;CDH12;ZNF703;CDH6;CTNND2;RHOC;PARD6B;JAM3;GJB2;CDH18;FSCN1;CDH10;CLDN12;CDH8;ACTG1;CD9;CDH15;PKP3	ImmuneCells
203	GO_Biological_Process_2023__Water Transport (GO:0006833)	0.490885	2.12265	0	0.048656	0.882	10/15	20.34%	AQP7;AQP9;AQP7B;PDPN;AQP3;AQP4;SLC5A1;AQP8;CFTR;AQP11	ImmuneCells
204	GO_Biological_Process_2023__Synaptic Vesicle Cycle (GO:0099504)	-0.366288	-2.12178	0	0.0137294	0.87	25/36	39.86%	CDK5;WNT7A;SLC32A1;SYT10;CPLX1;SLC17A6;SNAP25;RAB3A;SYT7;CPLX2;STX1A;VAMP2;BRSK1;CDH2;SLC17A7;SLC17A8;RIMS1;CPLX4;NLGN1;AP3S2;SNAPIN;WNT3A;SYNDIG1;PCLO;AP3M2	ImmuneCells
205	GO_Molecular_Function_2023__Wnt Receptor Activity (GO:0042813)	0.484687	2.11949	0	0.0489612	0.888	10/16	19.42%	FZD7;NID1;FZD9;FZD5;FZD8;ROR1;FZD4;FZD6;FZD2;FZD10	ImmuneCells
206	GO_Cellular_Component_2023__Respiratory Chain Complex IV (GO:0045277)	-0.498482	-2.11642	0.00172117	0.0142549	0.885	14/17	35.93%	NDUFA4L2;COX8A;NDUFA4;COX5A;COX6A1;COX5B;COX7A2;COX6B1;COX7C;UQCRFS1;COX6C;COX4I1;COX6A2;COX7B	ImmuneCells
207	GO_Biological_Process_2023__Regulation Of Response To Biotic Stimulus (GO:0002831)	0.360808	2.11508	0.00246305	0.0498133	0.892	28/31	52.61%	FGR;CD36;FCGR2B;GATA6;BIRC3;PTPN22;DAPK1;DHX58;CD55;IRF1;HERC5;LRP8;FOXP1;TRIM5;ELMOD2;TRAF3;RNF135;CASP8;SAMHD1;APPL1;XIAP;BIRC2;N4BP1;NFE2L2;ERAP1;CGAS;ZMPSTE24;TIRAP	ImmuneCells
208	GO_Biological_Process_2023__Defense Response To Gram-positive Bacterium (GO:0050830)	0.301789	2.11336	0.002457	0.0496031	0.896	23/44	24.54%	TLR2;FGR;GBP2;H2BC12;STAB2;GBP7;MYD88;H2BC8;H2BC11;H2BC21;LYZ;GBP6;MR1;LYG2;TNFRSF14;LYG1;HMGB2;HLA-A;GBP4;RNASE6;CASP4;EHHADH;HLA-E	ImmuneCells
209	GO_Biological_Process_2023__Nuclear-Transcribed mRNA poly(A) Tail Shortening (GO:0000289)	0.437799	2.11277	0.00479616	0.0491751	0.9	19/19	56.27%	PNLDC1;ZFP36;TNKS1BP1;CNOT3;SAMD4A;CNOT8;TUT7;CNOT10;CNOT9;CNOT2;TUT4;CNOT4;PARN;CNOT6;CNOT6L;SAMD4B;CNOT11;CNOT7;PAN2	ImmuneCells
210	GO_Biological_Process_2023__Mitochondrial Electron Transport, Cytochrome C To Oxygen (GO:0006123)	-0.521365	-2.11271	0.00168919	0.014571	0.892	13/15	35.93%	COX8A;NDUFA4;COX5A;CYCS;COX6A1;COX5B;COX7A2;COX6B1;COX7C;COX6C;COX4I1;COX6A2;COX7B	ImmuneCells
211	WikiPathway_2023_Human__Pathogenesis Of SARS CoV 2 Mediated By Nsp9 Nsp10 Complex WP4884	-0.487197	-2.11248	0.00357782	0.0144876	0.893	11/18	20.01%	ZAP70;LCK;CD8B;CD3G;CD8A;CD2;MMP25;CD3E;CXCL8;FYN;IL6	ImmuneCells
212	GO_Biological_Process_2023__Generation Of Neurons (GO:0048699)	-0.238543	-2.10947	0	0.0147368	0.898	61/153	23.99%	CTF1;SHH;CDK5;LHX6;WNT7A;CCK;WNT7B;DNAAF4;WNT4;VAX1;SEPTIN4;INSM1;VXN;MET;POMGNT2;WNT5B;ASTN1;DNER;SOX11;ASCL1;VAX2;RNF112;WNT10A;DCX;NOVA2;EMX1;WNT9B;LHX4;EMX2;BRSK2;NELL1;MYT1L;INSM2;ATP2B2;SNPH;LMX1B;MAPT;WNT9A;FZD3;MDGA1;SEPTIN14;BRSK1;MAP1B;CDK5R1;FUT9;NGRN;GPM6A;NR4A2;EML1;RELN;SPOCK1;MARK1;DCDC2;NLGN4X;POU3F2;TRIM46;ITM2C;ADGRL3;TAFA1;KIAA0319;TUBB2B	ImmuneCells
213	GO_Cellular_Component_2023__Axonal Growth Cone (GO:0044295)	-0.533308	-2.10888	0.00545455	0.0146699	0.9	10/15	23.84%	FKBP4;KIF5C;L1CAM;OLFM1;FLRT3;RTN4R;GPM6A;HSP90AB1;HSP90AA1;COBL	ImmuneCells
214	GO_Biological_Process_2023__Positive Regulation Of Cytokine-Mediated Signaling Pathway (GO:0001961)	0.320004	2.10678	0	0.0505602	0.913	26/42	33.12%	NLRC5;WNT5A;CXCR4;EDN1;TRIM6;IRGM;PARP9;HSPA1B;IL7;IGF2BP1;HIF1A;PARP14;IKBKE;TXK;CD300LF;AGPAT2;GAS6;CASP1;CASP4;RBM47;AXL;CPNE1;TRIM56;LAPTM5;MAVS;PRKN	ImmuneCells
215	KEGG_2021_Human__Basal transcription factors	0.312609	2.10082	0	0.0520359	0.92	39/42	59.63%	TAF7L;GTF2H4;TBPL2;TAF13;GTF2IRD1;TAF6L;TAF5;TAF12;TAF8;TAF5L;GTF2H2C;ERCC3;TBP;TAF11;CDK7;MNAT1;TAF2;TAF3;GTF2H1;CCNH;GTF2E2;GTF2I;TAF15;TAF1;GTF2B;GTF2A1;GTF2H3;GTF2F2;GTF2H2;TAF4;GTF2E1;TAF7;GTF2H5;TAF4B;TAF9;TAF10;TAF6;TAF9B;GTF2A2	ImmuneCells
216	GO_Biological_Process_2023__Detection Of Chemical Stimulus Involved In Sensory Perception Of Taste (GO:0050912)	0.418358	2.10038	0	0.0515929	0.92	12/22	15.50%	PKD2L1;TAS2R46;TAS2R13;TAS2R43;PKD1L3;TAS2R50;LPO;TAS2R19;RTP4;TAS2R30;TAS1R3;TAS2R10	ImmuneCells
217	GO_Biological_Process_2023__Translesion Synthesis (GO:0019985)	0.413758	2.09841	0.00243309	0.0514971	0.92	18/23	36.60%	TNFSF13B;USP43;POLDIP2;PARP10;PCNA;POLD1;PCLAF;POLD2;VCP;RCHY1;SPRTN;POLH;POLD3;TENT4A;REV3L;PRIMPOL;POLI;USP10	ImmuneCells
218	MSigDB_Hallmark_2020__Angiogenesis	0.339743	2.09756	0	0.0512118	0.924	15/34	14.93%	STC1;THBD;LPL;S100A4;SPP1;APOH;SLCO2A1;VEGFA;VCAN;ITGAV;KCNJ8;VTN;NRP1;FSTL1;PDGFA	ImmuneCells
219	GO_Biological_Process_2023__Regulation Of Presynapse Assembly (GO:1905606)	-0.50387	-2.08996	0.0018018	0.0170305	0.931	10/16	19.55%	WNT7A;SLITRK2;LRFN5;LRRTM3;IL1RAPL2;MDGA1;LRRC4B;LRFN4;SLITRK3;SLITRK1	ImmuneCells
220	GO_Biological_Process_2023__Regulation Of Presynapse Organization (GO:0099174)	-0.50387	-2.08996	0.0018018	0.0170305	0.931	10/16	19.55%	WNT7A;SLITRK2;LRFN5;LRRTM3;IL1RAPL2;MDGA1;LRRC4B;LRFN4;SLITRK3;SLITRK1	ImmuneCells
221	GO_Biological_Process_2023__Transport Across Blood-Brain Barrier (GO:0150104)	0.245838	2.08709	0	0.0541396	0.936	31/83	17.42%	SLC22A1;CD36;SLC2A3;SLC22A3;SLC8A2;SLC7A5;SLC1A3;SLC7A3;SLC38A5;SLC16A12;TFRC;SLC1A1;SLCO3A1;SLC6A13;SLC4A4;KCNJ8;INSR;SLC5A1;SLC1A2;LRP2;ATP1B2;SLC28A2;MFSD2A;SLC7A1;AVPR1A;SLC2A1;SLC5A5;SLC13A3;SLC7A2;ATP1A2;ABCC2	ImmuneCells
222	GO_Biological_Process_2023__Neuron Projection Guidance (GO:0097485)	-0.251177	-2.08567	0	0.0175501	0.941	56/120	27.68%	BDNF;SHH;EFNB3;SLIT2;BOC;NOTCH3;SEMA3G;LGI1;EFNA2;ARHGEF25;EFNB2;KIF5C;EPHA10;LRTM2;KIF5A;ROBO4;TUBB3;SEMA3E;CYFIP2;RET;L1CAM;NELL1;TNR;EPHA5;LRTM1;EPHA4;SEMA5A;CXCL12;DPYSL5;CDK5R1;EFNA5;SEMA3C;FEZ1;ENAH;KALRN;GLI2;FYN;SEMA3D;ROBO2;RELN;SEMA3B;CNTN5;RPS6KA5;NFASC;CNTN4;EPHB6;EPHA7;DSCAM;NRXN1;NRXN3;CNTN1;EPHB3;EPHA3;NELL2;NRCAM;EFNA4	ImmuneCells
223	GO_Molecular_Function_2023__Hydrolase Activity, Hydrolyzing O-glycosyl Compounds (GO:0004553)	0.374923	2.08267	0.00247525	0.0548672	0.939	18/27	30.57%	CHI3L1;CHIT1;ACER3;HYAL2;CHI3L2;OVGP1;HPSE;GBA1;GLA;IDUA;GALC;ACER2;NEU3;GUSB;MAN1A1;MOGS;HEXD;CTBS	ImmuneCells
224	GO_Molecular_Function_2023__Monoatomic Ion Gated Channel Activity (GO:0022839)	-0.361903	-2.08171	0.00328407	0.0180305	0.948	19/38	21.06%	CHRNA4;CALHM1;CHRNB2;PIEZO2;GRIN1;TRPM5;TMC4;TMC5;CACNA1H;KCNA3;KCNT1;ANXA6;TMC3;ZACN;CHRNA5;TMC7;KCNK15;GABRB1;KCNT2	ImmuneCells
225	GO_Cellular_Component_2023__Calcium Channel Complex (GO:0034704)	-0.314872	-2.07844	0	0.0184884	0.951	30/59	25.30%	CACNA1S;CACNA1G;SCN5A;CACNA2D2;CASQ2;SCN10A;CACNG7;CACNG8;CACNA1H;FKBP1B;TRPC4;CACNA1I;CALM1;CALM3;SCN2A;SCN3A;SMDT1;PDE4D;CACNG3;CACNB2;SCN8A;TRPC5;SCN4A;SCN1A;CACNA1E;CACNB4;RYR2;CACNA2D1;CALM2;CACNA2D3	ImmuneCells
226	GO_Biological_Process_2023__Cell-Cell Adhesion Mediated By Cadherin (GO:0044331)	-0.415187	-2.07711	0.00170068	0.018572	0.952	19/26	33.33%	CDH13;CDH7;CDH1;CDH17;CDH4;CDH22;CDH2;CDH3;CDH11;CDHR3;CDH9;CDH12;CDH6;CDH18;CDH10;CDH8;CDH15;PLEKHA7;MMP24	ImmuneCells
227	WikiPathway_2023_Human__NRXN1 Deletion Syndrome WP5398	-0.478734	-2.07689	0.00527241	0.018477	0.952	14/17	34.93%	GRIN1;GRIN2C;GRIN2B;GRIN2A;GRIN3A;GRIA1;GRIA4;GRIA3;NLGN4X;GRIA2;NRXN1;NLGN3;NLGN1;DLG4	ImmuneCells
228	GO_Biological_Process_2023__Positive Regulation Of Synaptic Transmission, Glutamatergic (GO:0051968)	-0.441559	-2.0756	0	0.0185959	0.952	15/21	30.03%	CCL2;GRIN1;GRIN2C;CACNG7;GRIN2B;CACNG8;GRIN2A;SHANK3;DRD1;CACNG3;RELN;CACNG5;NRXN1;CCR2;NLGN3	ImmuneCells
229	KEGG_2021_Human__Mineral absorption	0.29198	2.0746	0.0026178	0.0572922	0.952	24/53	18.93%	VDR;MT1A;SLC9A3;SLC8A2;MT1F;HMOX1;MT1X;SLC26A9;MT1G;SLC11A2;HEPHL1;HEPH;MT1M;SLC5A1;MT2A;SLC26A3;ATP1B2;SLC31A1;FTL;FXYD2;ATP1A2;CLCN2;FTH1;MT1E	ImmuneCells
230	MSigDB_Hallmark_2020__Spermatogenesis	-0.258197	-2.07456	0	0.0186153	0.954	47/113	24.37%	MTNR1A;CDKN3;GSG1;ACE;HSPA1L;CCNB2;ZPBP;SEPTIN4;CHRM4;ACRBP;IL13RA2;CNIH2;NEFH;TKTL1;IL12RB2;CCNA1;PAPOLB;CAMK4;DDX4;ADCYAP1;GAD1;SCG5;SHE;GFI1;SCG3;DDX25;TTK;TNNI3;DMRT1;YBX2;OAZ3;HTR5A;HSPA4L;LDHC;CLGN;GAPDHS;RPL39L;DMC1;NEK2;PCSK4;PCSK1N;GRM8;TULP2;HBZ;SNAP91;THEG;HSPA2	ImmuneCells
231	GO_Biological_Process_2023__Fatty Acid Transport (GO:0015908)	0.337954	2.07385	0.00514139	0.056984	0.952	15/34	16.14%	ACSL1;SLC22A1;CD36;CPT1B;SLCO2A1;RBP7;SLCO3A1;SLC27A6;FABP12;PMP2;MFSD2A;PPARG;FABP1;PPARD;SLC22A11	ImmuneCells
232	GO_Cellular_Component_2023__Ionotropic Glutamate Receptor Complex (GO:0008328)	-0.373505	-2.07286	0	0.0187573	0.954	18/33	22.25%	SHISA7;GRIN1;GRIN2C;CACNG7;GRIN2B;CACNG8;VWC2;GRIK3;GRIN2A;GRIN3A;GRIA1;VWC2L;GRIA4;CACNG3;GRIA3;SHISA9;GRIA2;CACNG5	ImmuneCells
233	GO_Biological_Process_2023__mRNA Destabilization (GO:0061157)	0.313996	2.07069	0.00266667	0.0575533	0.956	36/43	46.69%	DND1;ZFP36;ZC3H12A;PLEKHN1;TRIM71;RIDA;KHSRP;PDE12;ZC3H12D;DCPS;MOV10;YTHDF1;AGO4;DIS3L2;METTL16;TUT7;ROCK1;DHX36;FTO;TUT4;GIGYF2;AGO3;CPEB3;PUM1;CELF1;RC3H1;CNOT1;METTL14;TARDBP;UPF1;YTHDF2;RC3H2;FXR1;YTHDF3;AGO2;ROCK2	ImmuneCells
234	WikiPathway_2023_Human__IL 17 Signaling Pathway WP2112	0.369954	2.07051	0.00251889	0.0569735	0.957	25/28	49.81%	IL17B;CEBPD;IL17RB;CEBPB;IL17RD;IL17RE;NFKBIB;IKBKG;MAPK3;IL17RA;TRAF3IP2;STAT3;AKT1;NFKB1;TRAF3;SP1;JAK2;MAP3K7;GSK3B;MAPK1;IKBKB;TRAF6;JAK1;PIK3CA;MAP3K14	ImmuneCells
235	GO_Biological_Process_2023__Regulation Of Cation Channel Activity (GO:2001257)	-0.327127	-2.07037	0.0015949	0.0189787	0.956	31/52	31.45%	KCNS2;STAC;KCNG1;KCNAB1;JPH4;FKBP1B;ANK3;HCN1;HCN4;JPH1;KCNE5;JPH3;CALM1;JSRP1;NETO1;VAMP2;HCN2;PDE4D;AHNAK;CACNB2;JPH2;EDNRA;FGF11;FGF12;CACNB4;CALM2;DMD;FKBP1A;FGF14;MMP9;CACNB1	ImmuneCells
236	KEGG_2021_Human__JAK-STAT signaling pathway	0.223842	2.06892	0	0.056776	0.958	46/122	22.39%	SOCS3;IL15;PIM1;JAK3;SOCS1;IFNLR1;OSM;IL4R;LIF;IL11RA;IL2RG;IL21R;CDKN1A;CISH;GFAP;IL3RA;IL7;THPO;PDGFRB;PIK3R2;MYC;IL7R;IL10;PTPN2;STAT4;OSMR;EPO;IL2RA;PRLR;IL5;IL23A;IL20RB;PDGFA;CCND3;IL27RA;IL10RA;MCL1;IL10RB;STAT1;IFNAR2;STAT5A;PTPN6;IL15RA;STAT2;CSF2RB;CCND1	ImmuneCells
237	KEGG_2021_Human__One carbon pool by folate	0.412943	2.06829	0	0.0563294	0.958	15/20	35.81%	TYMS;ALDH1L1;ST20-MTHFS;ALDH1L2;SHMT2;MTHFD2;DHFR2;MTHFS;GART;FTCD;ATIC;MTHFD1;MTHFR;MTR;MTHFD1L	ImmuneCells
238	WikiPathway_2023_Human__Regucalcin In Proximal Tubule Epithelial Kidney Cells WP4838	0.360445	2.06742	0.0074813	0.0560027	0.96	26/29	51.57%	TNFSF11;SEC16B;NOS1;RGN;BAK1;TGFBR1;PDE1B;ACTA2;BAX;AKT1;CASP9;CASP8;TNFRSF1A;G3BP1;MCU;MTOR;SMAD2;RAF1;BRAF;APAF1;MAPK1;SMAD4;PIK3CA;MAP3K5;CASP3;TGFB1	ImmuneCells
239	WikiPathway_2023_Human__GPCRs Other WP117	-0.292767	-2.06501	0.00151976	0.0197071	0.962	43/72	32.24%	GPR55;CCKBR;F2R;P2RY13;OR2F1;GPR17;DRD4;ACKR1;CNR1;HTR2A;OR7A17;SSTR2;CHRM2;HTR1F;PROKR2;MCHR2;CELSR3;ADGRD1;GPR83;UTS2R;GPR88;GPR61;DRD3;HRH4;OR2M4;RXFP1;EDNRA;GPR176;CHRM3;ADGRF5;CELSR2;GRM8;GRM1;ADGRL3;SMO;GPR143;GPR162;FSHR;ADORA2A;OR3A3;ADRB2;GPR183;CELSR1	ImmuneCells
240	GO_Biological_Process_2023__Positive Regulation Of Immune Response (GO:0050778)	0.261416	2.06432	0	0.0564115	0.961	32/70	26.29%	IL15;NOD2;CD1D;C7;PLSCR1;FCGR2B;CCL5;CFP;FPR2;IL10;IFI35;CCR7;SH2D1B;GBP5;TGFB2;TNFSF4;IL23A;RSAD2;ZP3;LILRB1;SPHK2;TLR8;POLR3B;LGALS9;XBP1;POLR3F;TASL;HLA-DRB1;CD226;POLR3G;ITGB2;GSDME	ImmuneCells
241	GO_Cellular_Component_2023__Synaptic Membrane (GO:0097060)	-0.385258	-2.06262	0.0034188	0.0199846	0.964	16/31	19.50%	SHISA7;GRIN1;GRIN2B;GRIN2A;SYDE2;ATP2B2;FLRT3;ITGA3;PDE2A;GRIA1;TMEM240;LRRTM2;LRRTM1;SHISA9;SLITRK3;SYDE1	ImmuneCells
242	KEGG_2021_Human__Chronic myeloid leukemia	0.262591	2.0625	0.00290698	0.0565968	0.961	63/76	52.21%	GADD45B;CDKN1A;TGFB3;PIK3R2;MYC;E2F2;E2F1;BAK1;TGFB2;TGFBR1;CDK4;GADD45G;IKBKG;MAPK3;STAT5A;CCND1;CDKN2A;ARAF;RB1;SHC1;BAX;DDB2;NFKBIA;BCR;AKT1;E2F3;RUNX1;NFKB1;HDAC1;CDK6;CDKN1B;GRB2;CTBP1;CHUK;MDM2;AKT2;STAT5B;PIK3CD;PIK3R1;TGFBR2;GAB2;SOS2;RAF1;MAP2K1;SOS1;PIK3CB;BRAF;ABL1;CBL;POLK;MAPK1;SMAD4;IKBKB;HDAC2;PTPN11;KRAS;CRK;PIK3CA;CTBP2;AKT3;TGFB1;CRKL;SMAD3	ImmuneCells
243	GO_Biological_Process_2023__Neuron Projection Morphogenesis (GO:0048812)	-0.23735	-2.06226	0	0.0199097	0.964	77/141	39.01%	BDNF;CDK5;WNT7A;ADGRB1;CCK;NRN1;SHANK1;NGF;NYAP1;NEFH;MAPK8IP2;NTNG1;TUNAR;PLPPR4;CNTNAP1;ANK3;BRSK2;SPAG6;PACSIN1;RAB3A;UBB;SLITRK2;ZNF365;MAP1A;SHANK3;FLRT3;LLGL1;SSNA1;DRD2;EPHA4;BRSK1;MAP1B;TNN;SLITRK5;CTTN;GPM6A;PAK3;SLITRK3;SLITRK1;DCLK1;S100A6;NYAP2;DCDC2;NCKAP1;TRIM46;CELSR2;SLITRK4;APBB1;FGFR2;CNTN4;NOL3;FLRT1;CNTNAP2;EPHB3;APLP1;CTNND2;NTNG2;MAP2;NRCAM;PARD6B;PAX2;MAP6;NTF3;NRN1L;NLGN1;…	ImmuneCells
244	KEGG_2021_Human__Pathways of neurodegeneration	-0.189319	-2.06043	0	0.0201625	0.966	219/445	39.00%	CACNA1S;BDNF;DNALI1;CDK5;MAPK11;NDUFA7;WNT7A;DNAI1;ATG101;WNT7B;AXIN2;WNT4;TUBB2A;MAP2K6;HAP1;GRIN1;NDUFA4L2;GRIN2C;NEFH;IL1B;DNAH5;DNAH8;WNT5B;GRIN2B;SPTBN2;COX7A1;CAMK2A;SEPTIN5;TUBA4A;CALML4;GPX3;FADD;KIF5C;WNT10A;KIF5A;NOS2;ITPR3;TUBB3;IL1A;APC2;COX8A;MAPK12;WNT9B;GRIN2A;NEFM;TUBB4A;NOX4;NDUFA4;PLCB4;TNF;NDUFB5;CAMK2B;SLC25A4;UBB;UCHL1;PDYN;ATP5MC1;PSMA8;NDUFB11;GPX2;ATP5MC3;STX1A;ATP5PF;TUBA…	ImmuneCells
245	GO_Molecular_Function_2023__Delayed Rectifier Potassium Channel Activity (GO:0005251)	-0.410957	-2.05926	0	0.0202055	0.968	15/26	21.30%	KCNA5;KCNH2;KCNA7;KCNG1;KCNA6;KCNA4;KCNS3;KCNB1;KCNG3;KCNA3;KCNE5;KCNA2;KCNB2;KCNC2;KCNC1	ImmuneCells
246	GO_Molecular_Function_2023__GABA-A Receptor Activity (GO:0004890)	-0.464956	-2.05829	0.00335008	0.0200906	0.97	12/18	20.17%	GABRD;GABRA6;GABRG3;GABRA4;GABRG2;GABRA5;GABRA3;GABRB3;GABRB2;GABRA2;GABRG1;GABRB1	ImmuneCells
247	GO_Cellular_Component_2023__GABA-A Receptor Complex (GO:1902711)	-0.464956	-2.05829	0.00335008	0.0200906	0.97	12/18	20.17%	GABRD;GABRA6;GABRG3;GABRA4;GABRG2;GABRA5;GABRA3;GABRB3;GABRB2;GABRA2;GABRG1;GABRB1	ImmuneCells
248	GO_Biological_Process_2023__piRNA Processing (GO:0034587)	-0.461387	-2.05765	0.00326264	0.0200559	0.97	13/19	24.26%	TEX15;ANKRD34C;EXD1;DDX4;TDRD12;ASZ1;ANKRD34B;TDRD1;MAEL;PLD6;GPAT2;TDRD9;TDRKH	ImmuneCells
249	GO_Biological_Process_2023__Vitamin Transport (GO:0051180)	0.331631	2.05727	0.00251256	0.0578841	0.965	14/36	11.65%	SLC22A1;APOA1;SLC52A3;CBLIF;SLC2A3;SLC2A6;SLC19A3;PDPN;SLC52A1;TCN2;FOLR3;SLC2A14;NPC1L1;LRP2	ImmuneCells
250	GO_Cellular_Component_2023__Microvillus (GO:0005902)	0.283961	2.0543	0	0.058394	0.968	23/53	19.30%	MYO1G;AOC3;FSCN3;CBLIF;CDHR2;CD44;HYAL2;SLC7A5;PROM2;CLIC4;PDPN;MYO1H;PROM1;ESPN;ITGAV;ANKS4B;MYO7B;MYO1E;PDGFA;MYO7A;TBC1D10A;ITGB3;SPN	ImmuneCells
251	GO_Biological_Process_2023__Positive Regulation Of Homotypic Cell-Cell Adhesion (GO:0034112)	0.463039	2.05116	0.00468384	0.0589523	0.968	8/15	13.73%	TNFSF11;EMILIN2;GP6;CCL5;PDPN;F11R;MFSD2B;PLAUR	ImmuneCells
252	KEGG_2021_Human__Ovarian steroidogenesis	0.322282	2.05009	0	0.0587652	0.968	18/39	18.60%	CYP19A1;ADCY4;CYP1B1;JMJD7-PLA2G4B;PTGS2;BMP6;ADCY2;HSD17B2;LHCGR;INSR;ADCY3;CYP11A1;ACOT1;AKR1C3;STAR;ADCY6;ACOT2;ADCY9	ImmuneCells
253	KEGG_2021_Human__Huntington disease	-0.204348	-2.04879	0	0.0213168	0.978	161/285	43.56%	CREB3L1;BDNF;DNALI1;NDUFA7;DNAI1;ATG101;CREB3L4;TUBB2A;HAP1;GRIN1;NDUFA4L2;DNAH5;DNAH8;GRIN2B;COX7A1;TUBA4A;GPX3;KIF5C;KIF5A;TUBB3;COX8A;TUBB4A;NDUFA4;PLCB4;NDUFB5;SLC25A4;ATP5MC1;PSMA8;NDUFB11;GPX2;ATP5MC3;STX1A;ATP5PF;TUBA1A;PLCB1;PSMC3;NDUFAB1;GRIA1;COX5A;CYCS;NDUFB10;PSMD8;NDUFB2;COX6A1;SOD1;COX5B;GRIA4;NDUFC2;POLR2I;GRIA3;POLR2J;POLR2L;NDUFA13;GRM5;ATP5F1D;NDUFA2;AP2S1;UQCRB;CYC1;NDUFA1;DCTN…	ImmuneCells
254	GO_Biological_Process_2023__Cellular Response To Cytokine Stimulus (GO:0071345)	0.179752	2.04588	0	0.0598013	0.971	99/251	26.74%	TLR2;FOXH1;TNFSF11;GBP2;JAK3;CHI3L1;SOCS1;IL4R;WNT5A;CXCR4;AIM2;TRIM6;CCL8;IL11RA;IL2RG;IFITM2;GPER1;IL21R;IRGM;CCL3;HYAL2;CCL5;DCSTAMP;NKX3-1;ADAMTS12;IL3RA;IL7;ZFP36;MT1X;SOX9;IL7R;NLRP12;FLT3;STAT4;ZC3H12A;HIF1A;CCR7;PLP2;MME;RHEX;OSMR;DUSP1;SBNO2;GBP1;HCLS1;DAPK1;CCL20;AQP4;GBP5;PRLR;CACTIN;TRADD;MT2A;NPR2;NLRP7;GBP6;ASAH2;MAPK13;DAB2IP;GBA1;CRLF1;RUFY4;CLCF1;CD58;IL27RA;YBX3;IFIT1;GBP3;LILRB…	ImmuneCells
255	WikiPathway_2023_Human__Interactome Of Polycomb Repressive Complex 2 PRC2 WP2916	0.46203	2.0423	0.00721154	0.0604999	0.972	16/16	53.84%	EZH2;TRIM35;STK38;ELL;AEBP2;THRAP3;SUZ12;MTF2;SETX;BCLAF1;MORC3;RBBP4;EED;JARID2;RBBP7;EZH1	ImmuneCells
256	GO_Biological_Process_2023__Negative Regulation Of T Cell Activation (GO:0050868)	0.309771	2.04007	0.0026455	0.0607291	0.973	13/41	7.43%	JAK3;VSIG4;CEACAM1;CD80;FCGR2B;CR1;GPNMB;IL4I1;SDC4;TNFAIP8L2;IL10;LGALS3;PTPN22	ImmuneCells
257	KEGG_2021_Human__Glutamatergic synapse	-0.249315	-2.03829	0	0.0231436	0.986	44/109	23.21%	GNGT1;GNG3;GNG13;SHANK1;SLC38A3;SLC1A6;GRIN1;GRIN2C;GRIN2B;GNG11;ITPR3;GRIK3;SLC17A6;GRIN2A;PLCB4;SLC38A1;GNG4;KCNJ3;SHANK3;GRIN3A;ADCY1;ADCY8;PLCB1;GNB5;GNG8;GRIA1;GNAO1;GRM3;SLC17A7;GLS2;GRIA4;PLA2G4B;GRM2;SHANK2;PRKCG;ADCY5;GRIA3;GRM5;SLC17A8;GRIA2;GRM8;GRM1;GNB3;DLGAP1	ImmuneCells
258	GO_Biological_Process_2023__Negative Regulation Of Viral Process (GO:0048525)	0.281907	2.03745	0	0.0609396	0.974	25/56	23.74%	OASL;TRIM6;PLSCR1;IFITM2;CCL5;ISG20;IFITM3;ZFP36;OAS3;TRIM14;OAS2;TRIM21;ISG15;MX1;BST2;RSAD2;TRIM32;APOBEC3C;ZC3HAV1;IFIT1;STAT1;IFIT5;TRIM11;ZNFX1;IFIH1	ImmuneCells
259	GO_Biological_Process_2023__Neutrophil Migration (GO:1990266)	0.299463	2.03734	0	0.0603519	0.974	18/49	14.93%	S100A8;TREM1;S100A9;CXCL1;EDN1;CXCL3;CCL8;CXCL2;CCL3;CCL5;EMP2;KLF5;LGALS3;CCL20;CXCL5;TGFB2;CXCR2;FCER1G	ImmuneCells
260	GO_Molecular_Function_2023__Lysine-Acetylated Histone Binding (GO:0070577)	0.400979	2.03508	0.00239808	0.0601807	0.977	20/22	46.57%	BRDT;MLLT3;CARM1;MLLT1;BRD9;YEATS4;BRD2;DPF2;BAZ2A;ZMYND8;ZZEF1;PHIP;BRD4;PSME4;TAF1;BRD7;ZZZ3;TRIM24;KMT2A;SMARCA4	ImmuneCells
261	GO_Molecular_Function_2023__Acetylation-Dependent Protein Binding (GO:0140033)	0.400979	2.03508	0.00239808	0.0601807	0.977	20/22	46.57%	BRDT;MLLT3;CARM1;MLLT1;BRD9;YEATS4;BRD2;DPF2;BAZ2A;ZMYND8;ZZEF1;PHIP;BRD4;PSME4;TAF1;BRD7;ZZZ3;TRIM24;KMT2A;SMARCA4	ImmuneCells
262	GO_Biological_Process_2023__Epidermal Cell Differentiation (GO:0009913)	0.307096	2.03348	0.00261097	0.0601855	0.979	21/42	26.61%	ST14;CSTA;SCEL;WNT5A;TGM1;EPHA2;EVPL;GATA6;GLI1;CLIC4;DSP;CDSN;AKR1C3;UGCG;POU2F3;USH2A;TXNIP;ASAH1;OPN3;BCR;ADAM9	ImmuneCells
263	GO_Molecular_Function_2023__Postsynaptic Neurotransmitter Receptor Activity (GO:0098960)	-0.472492	-2.03337	0.0015949	0.0239578	0.987	12/18	22.62%	CHRNA4;CHRNB2;DRD5;DRD4;CHRFAM7A;GRIA1;DRD1;CHRNA2;CHRNA5;GRM5;CHRNA6;GRM1	ImmuneCells
264	WikiPathway_2023_Human__Monoamine GPCRs WP58	-0.390168	-2.03324	0.00329489	0.0238296	0.987	21/32	27.73%	DRD5;HTR1A;CHRM4;DRD4;HTR2A;ADRA1A;CHRM2;HTR1F;HTR2B;HTR2C;HRH1;DRD1;DRD2;HTR5A;DRD3;ADRA2A;CHRM3;HTR1E;CHRM1;ADRB1;ADRA2B	ImmuneCells
265	KEGG_2021_Human__cAMP signaling pathway	-0.219794	-2.03268	0	0.0237779	0.988	76/197	24.91%	OXT;SST;CACNA1S;CREB3L1;BDNF;F2R;FFAR2;FXYD1;DRD5;ATP2B3;MYL9;HTR1A;SSTR1;CREB3L4;VIP;GRIN1;GRIN2C;NPY;GRIN2B;EDN3;NPPA;CAMK2A;ATP1A3;CALML4;GIPR;GLP1R;VIPR2;HCAR1;SSTR2;CNGA1;GABBR1;CHRM2;HTR1F;CAMK4;RAPGEF3;NPY1R;ADCYAP1;GRIN2A;HCN4;RAC3;PDE3A;CAMK2B;ATP2B2;GRIN3A;ADCY1;ADCY8;TNNI3;ADORA1;CALM1;GRIA1;DRD1;CALM3;PIK3R3;DRD2;GABBR2;RRAS;PTGER2;HCN2;PDE4D;GRIA4;ADCY5;GRIA3;EDNRA;PDE10A;CNGB3;ADCYA…	ImmuneCells
266	WikiPathway_2023_Human__RANKL RANK Signaling Pathway WP2018	0.289716	2.03251	0	0.0600296	0.979	39/50	45.75%	TNFSF11;TNFRSF11B;PIK3R2;FOS;PAPSS2;MITF;RELB;NFKB2;STAT1;IKBKG;MAPK3;TRAF1;PTK2;NFKBIA;AKT1;NFATC1;NFKB1;TRAF3;MAP2K7;CDC42;CHUK;AKT2;SPI1;MAPK14;PIK3R1;GAB2;MTOR;LYN;MAP3K7;MAP2K1;CBL;MAPK1;SYK;IKBKB;TAB2;RAC1;MAPK8;MAPK9;TRAF6	ImmuneCells
267	GO_Biological_Process_2023__I-kappaB kinase/NF-kappaB Signaling (GO:0007249)	0.303664	2.03239	0	0.0594922	0.979	43/44	66.54%	TLR2;BCL3;BIRC3;DAB2IP;TIFA;RELB;NFKB2;TLR8;TBKBP1;IKBKG;NKIRAS2;REL;TLR3;FAIM;TRIM8;NFKBIA;AZI2;PRDX4;NFKB1;TANK;RIPK2;CHUK;CARD11;TBK1;ROCK1;BIRC2;MAP3K7;ERC1;IKBKB;TRAF6;ROCK2;ZNF675;MAP3K14;BCL10;TIRAP;TLR7;RELA;NKIRAS1;IRAK1BP1;TLR4;IRAK2;NFKBIL1;DEFB124	ImmuneCells
268	WikiPathway_2023_Human__Integrated Cancer Pathway WP1971	0.304748	2.03205	0.00544959	0.0590307	0.98	40/43	60.16%	CDKN1A;CDK1;MYC;E2F1;CHEK1;CDK4;CDK2;CDKN2B;BACH1;BBC3;STAT1;CDC25B;BLM;CHEK2;RB1;BAX;AKT1;CASP9;BCL2;CDKN1B;CASP8;MDM2;ATR;PTEN;MRE11;BARD1;SMAD2;POU2F1;MSH6;ATF1;ATM;JAK1;MAP3K5;CASP3;SMAD3;NOXA1;MSH2;RAD50;TP53;BRCA1	ImmuneCells
269	GO_Biological_Process_2023__Monoatomic Cation Transmembrane Transport (GO:0098655)	-0.205976	-2.02739	0	0.0247315	0.989	81/262	16.56%	KCNA5;CACNA1S;KCNS2;CACNA1G;KCNK2;SLC39A1;KCNH2;SLC40A1;SCN5A;LRRC55;CACNG1;SLC6A12;KCNA7;SLC30A3;KCNG1;ATP4A;KCNK1;ATP12A;SCN2B;KCNK3;SCN10A;KCNV1;GRIN1;GRIN2C;SLC30A8;SCN3B;TRPM5;SLC39A4;KCNA6;GRIN2B;KCNK12;KCNA4;SCARA5;KCNH4;SLC6A17;ASIC1;ATP1A3;SLC6A20;SLC6A11;ATP6V1F;KCNS3;CNGA1;KCNH6;KCNB1;KCNH3;SLC6A9;ABCC9;SLC9A2;SLC24A3;KCNG3;KCNA3;SLC6A7;GRIN2A;HCN1;KCNF1;TRPC4;KCNN1;HCN4;TRPC6;SLC9A4;S…	ImmuneCells
270	GO_Biological_Process_2023__Regulation Of Dendrite Extension (GO:1903859)	-0.489099	-2.02674	0.00175747	0.0246473	0.99	11/17	26.90%	UNC13A;CPNE6;OSTN;SYT3;SYT2;SYT4;SYT1;CPNE9;RIMS2;RASAL1;RIMS1	ImmuneCells
271	GO_Biological_Process_2023__Neuron Migration (GO:0001764)	-0.309765	-2.02537	0.00314961	0.0247157	0.99	24/54	23.99%	CDK5;CCK;SOX1;DNAAF4;SEPTIN4;POMGNT2;ASTN1;DNER;DCX;SEMA3E;NELL1;MDGA1;SEPTIN14;MAP1B;CDK5R1;GPM6A;NR4A2;RELN;SPOCK1;MARK1;DCDC2;TRIM46;KIAA0319;TUBB2B	ImmuneCells
272	GO_Molecular_Function_2023__Chemokine Receptor Activity (GO:0004950)	0.455823	2.02481	0.00645161	0.0612446	0.982	9/16	14.13%	ACKR3;CXCR4;CCR3;CCR7;CCR4;CCR5;GPR35;ACKR4;CXCR2	ImmuneCells
273	GO_Biological_Process_2023__Cellular Response To Molecule Of Bacterial Origin (GO:0071219)	0.225212	2.02275	0.00299401	0.0615872	0.982	46/100	28.29%	TLR2;NOD2;GBP2;CXCL1;WNT5A;CD80;FCGR2B;CXCL3;NUGGC;CXCL2;IRGM;FZD5;SERPINE1;ZFP36;IL10;ZC3H12A;CD68;MYD88;SBNO2;TNFAIP3;CACTIN;CD14;CXCL5;NLRP7;TNFSF4;AHR;CCR5;DAB2IP;VIM;NFKBIB;GBP3;LILRB1;HMGB2;CASP1;CARD16;XBP1;EHHADH;TNFRSF1B;PDCD1LG2;LY96;CD86;CASP7;ADAM9;CTR9;AXL;NFKB1	ImmuneCells
274	GO_Biological_Process_2023__Granulocyte Chemotaxis (GO:0071621)	0.298876	2.02169	0.00527704	0.0614894	0.983	17/46	14.93%	S100A8;TREM1;S100A9;CXCL1;EDN1;CXCL3;CCL8;CXCL2;CCL3;CCL5;KLF5;LGALS3;CCL20;CXCL5;TGFB2;CXCR2;FCER1G	ImmuneCells
275	GO_Biological_Process_2023__Vascular Transport (GO:0010232)	0.241313	2.02167	0	0.0609252	0.983	30/81	17.42%	SLC22A1;SLC2A3;SLC22A3;SLC8A2;SLC7A5;SLC1A3;SLC7A3;SLC38A5;SLC16A12;TFRC;SLC1A1;SLCO3A1;SLC6A13;SLC4A4;KCNJ8;INSR;SLC5A1;SLC1A2;LRP2;ATP1B2;SLC28A2;MFSD2A;SLC7A1;AVPR1A;SLC2A1;SLC5A5;SLC13A3;SLC7A2;ATP1A2;ABCC2	ImmuneCells
276	GO_Biological_Process_2023__Regulation Of Immune Response (GO:0050776)	0.262023	2.01999	0.0027933	0.0610859	0.984	30/68	25.86%	IL15;FGR;BCL6;FCGR3A;C7;PLSCR1;FCGR2B;IL4I1;PDCD1;BIRC3;CFP;FCRLB;FCGR1A;PTPN22;IRF4;TGFB2;TNFSF4;AHR;DHX58;RSAD2;IRF7;RIPK3;SPN;SLA2;IRF1;LRP8;SPPL2B;HLA-DRB1;DENND1B;SMCR8	ImmuneCells
277	GO_Biological_Process_2023__Negative Regulation Of Interleukin-8 Production (GO:0032717)	0.450272	2.01613	0.00481928	0.0614109	0.985	7/16	10.97%	BPI;BCL3;KLF4;IL10;PTPN22;SSC5D;CACTIN	ImmuneCells
278	GO_Biological_Process_2023__Central Nervous System Development (GO:0007417)	-0.203318	-2.01518	0	0.026734	0.993	97/261	25.14%	SPINK5;PPP1R17;SHH;CDK5;ABCB6;ZIC4;NES;CDK5R2;AMIGO2;PCDH18;CX3CR1;VAX1;CYP26C1;GRHL2;GRIN1;GRIN2C;HES5;AMIGO1;GRIN2B;CHST8;DNER;SOX11;SLC6A17;NNAT;VAX2;SOX8;EGR2;TPPP;DCX;EMX1;NFIB;GRIN2A;TAGLN3;EMX2;SHROOM4;ARNT2;SHROOM2;EOMES;NDRG4;FOXG1;ZIC2;NPAS2;PBX1;IL1RAPL2;MOG;HPCAL4;PAX6;NPTX1;JHY;TBR1;HSPG2;CA10;MDGA1;SLC8A3;CDH2;CDK5R1;PAFAH1B3;NMUR2;NHLH1;GSTP1;ECRG4;BRINP3;NKX2-2;KLK6;NR4A2;DCLK1;AD…	ImmuneCells
279	WikiPathway_2023_Human__Sudden Infant Death Syndrome SIDS Susceptibility Pathways WP706	-0.237307	-2.01493	0.00144928	0.0266167	0.994	54/146	21.05%	SST;CHRNA4;BDNF;CHRNB2;EGR1;FOXM1;KCNH2;SCN5A;VIPR1;HTR1A;SSTR1;TAC1;TPH2;GRIN1;NGF;SCN3B;IL1B;HES5;TF;GCK;ECE1;GATA3;ASCL1;ATP1A3;HTR2A;NEUROD1;VIPR2;GABRA1;TPPP;SSTR2;IL1A;CHRM2;RET;ADCYAP1;SNAP25;CDCA7L;TNF;SLC25A4;LMX1B;PBX1;NOS1AP;VAMP2;PLP1;ALDOA;SNTA1;CXCL8;RORA;NKX2-2;PRKAR1B;YWHAH;PRKAR2B;IL6;GAPDH;ADCYAP1R1	ImmuneCells
280	GO_Cellular_Component_2023__Tertiary Granule Membrane (GO:0070821)	0.255503	2.00876	0.00581395	0.0638571	0.987	30/68	26.64%	SLC11A1;CLEC5A;CLEC12A;CEACAM1;CD93;ADAM8;SLC2A3;SIGLEC14;MGAM;FCAR;FPR2;CHRNB4;ATP6V0C;SIGLEC5;CLEC4C;ATP11A;VAMP8;FCER1G;KCNAB2;RAP2B;STOM;TSPAN14;LAIR1;CD33;CYBA;CYBB;VAMP1;ITGB2;CD300A;NBEAL2	ImmuneCells
281	GO_Cellular_Component_2023__AMPA Glutamate Receptor Complex (GO:0032281)	-0.453573	-2.0067	0.00342466	0.0280628	0.995	12/19	22.25%	SHISA7;CACNG7;CACNG8;VWC2;GRIA1;VWC2L;GRIA4;CACNG3;GRIA3;SHISA9;GRIA2;CACNG5	ImmuneCells
282	GO_Biological_Process_2023__Regulation Of Tumor Necrosis Factor Production (GO:0032680)	0.220643	2.00535	0	0.0648694	0.987	47/113	25.44%	TLR2;NOD2;BPI;THBS1;FCGR3A;WNT5A;MC1R;CCL3;FZD5;ZFP36;NR1H4;IL33;IL10;OAS3;ZC3H12A;PTPN22;CLEC4A;OAS2;TNFAIP3;CACTIN;CD14;AMH;AZU1;IL23A;ARG2;GHRL;LILRB1;SPHK2;SPN;C5AR2;POMC;GAS6;PTPN6;FRMD8;LGALS9;CD33;LCP1;FOXP1;TLR3;EHHADH;IFIH1;RIGI;VSIR;HLA-E;STAT3;CYBA;LY96	ImmuneCells
283	GO_Biological_Process_2023__Amino Acid Import Across Plasma Membrane (GO:0089718)	0.375353	2.00411	0.00232019	0.064773	0.987	12/24	16.63%	SLC47A1;SLC7A5;SLC1A3;SLC36A1;SLC7A3;SLC38A5;SLC1A1;SLC6A13;SLC1A2;SLC22A4;SLC7A1;SLC7A2	ImmuneCells
284	GO_Molecular_Function_2023__Taste Receptor Activity (GO:0008527)	0.448521	2.0005	0.00683371	0.0658075	0.988	11/16	24.27%	PKD2L1;TAS2R46;TAS2R13;TAS2R43;TAS2R50;TAS2R19;TAS2R30;TAS1R3;TAS2R10;TAS2R20;TAS2R4	ImmuneCells
285	GO_Molecular_Function_2023__Serine-Type Endopeptidase Activity (GO:0004252)	-0.263094	-1.99995	0	0.0293753	0.995	51/89	33.98%	DPP4;TMPRSS4;PRTN3;RHBDL1;F12;MMP11;GZMB;F7;PCSK1;PRSS38;PRSS3;RHBDF1;F2;HPR;PRSS53;PCSK2;CELA1;GZMK;PRSS56;TLL1;MMP2;PROC;CTSV;KLK5;MASP1;PLAU;HABP2;KLK6;PLG;GZMH;PCSK4;CELA2A;TLL2;HGFAC;GZMM;HPN;CNTN1;PCSK6;ELANE;KLK14;CLPP;HTRA2;PLAT;APEH;MMP9;RHBDD3;PRSS54;RHBDL2;CTRL;CELA2B;MASP2	ImmuneCells
286	WikiPathway_2023_Human__Metabolic Pathways Of Fibroblasts WP5312	0.332376	1.9991	0.00789474	0.0657047	0.988	17/32	24.60%	ADAMTS2;CD36;FGFR4;P3H3;P4HA2;PHGDH;SLC2A1;PSAT1;P4HA3;LDHA;GPI;PLOD1;SLC1A5;ALDH18A1;LOXL2;BMP1;PGM1	ImmuneCells
287	GO_Biological_Process_2023__Diterpenoid Metabolic Process (GO:0016101)	0.368743	1.99858	0.00253807	0.0653933	0.988	15/24	28.94%	ADH1B;BCO1;RPE65;LRAT;RDH12;E2F1;ADH4;LRP2;RDH10;AKR1C3;AKR1B1;LRP8;RDH11;CYP4V2;PLB1	ImmuneCells
288	KEGG_2021_Human__Viral carcinogenesis	0.194492	1.99755	0	0.0652609	0.988	84/180	32.37%	H2BC14;H2BC3;JAK3;H2BC10;H2BC15;H2BC9;CDKN1A;H2BC12;CDK1;GTF2H4;H4C8;PIK3R2;MAD1L1;PXN;CCR3;H2BC4;H2BC8;H2BC11;H2BC21;CHEK1;TBPL2;H2BC18;CREB3L3;CCR4;BAK1;TRADD;SCIN;HDAC4;H4C2;CREB5;H2BC7;CCR5;CDK4;H2BC5;CDK2;CDKN2B;CCND3;IRF7;NFKB2;HLA-C;RBPJ;HDAC11;HLA-B;IKBKG;MAPK3;H2BC6;STAT5A;HLA-A;ATF4;CCND1;HLA-F;LTBR;SND1;REL;PRKACA;CDKN2A;SP100;TRAF1;HLA-E;MRPS18B;STAT3;RB1;ACTN4;IRF9;HDAC7;BAX;EIF2AK2;…	ImmuneCells
289	WikiPathway_2023_Human__Mitochondrial Complex IV Assembly WP4922	-0.372201	-1.99716	0.00480769	0.0299452	0.995	18/31	28.33%	SURF1;COX8A;COX16;COX14;NDUFA4;COA3;COX5A;PET117;COX6A1;HIGD1A;COX5B;COA6;COX7A2;COX6B1;COX7C;COX6C;PET100;COX4I1	ImmuneCells
290	GO_Biological_Process_2023__Nuclear-Transcribed mRNA Catabolic Process, Deadenylation-Dependent Decay (GO:0000288)	0.308511	1.9948	0.00248139	0.0658546	0.99	35/38	58.00%	PNLDC1;ZFP36;TNKS1BP1;PATL2;CNOT3;EXOSC9;PDE12;SAMD4A;DCPS;DCP1B;EXOSC2;CNOT8;DIS3;TUT7;CNOT10;CNOT9;CNOT2;EXOSC7;DCP1A;TUT4;DCP2;CNOT4;RC3H1;PARN;RC3H2;CNOT6;CNOT6L;PATL1;SAMD4B;CNOT11;EXOSC3;CNOT7;EXOSC8;PAN2;LSM1	ImmuneCells
291	GO_Biological_Process_2023__Long-Term Memory (GO:0007616)	-0.443284	-1.99461	0.0034904	0.0302912	0.995	10/19	18.49%	CALB1;NFATC4;SHANK1;LDLR;CAMK2N1;CAMK4;SLC2A4;LRRC66;RASGRF1;RGS14	ImmuneCells
292	GO_Biological_Process_2023__Adherens Junction Organization (GO:0034332)	-0.357785	-1.9932	0.00170648	0.0304435	0.995	21/35	32.04%	CDH13;RAMP2;CDH7;CDH1;CDH17;CDH4;CDH22;CDH2;CDH3;CDH11;CDHR3;CDH9;INAVA;CDH12;ZNF703;CDH6;JAM3;CDH18;CDH10;CDH8;CDH15	ImmuneCells
293	WikiPathway_2023_Human__Sleep Regulation WP3591	-0.362992	-1.9848	0.00329489	0.0322123	0.996	17/34	20.01%	OXT;CRH;CHRNB2;HTR2A;PER3;GRIN2A;PTGDR;CACNA1I;NPAS2;UTS2R;ADORA1;DRD1;DRD2;DRD3;HCRTR2;ADA;IL6	ImmuneCells
294	GO_Biological_Process_2023__Regulation Of Defense Response (GO:0031347)	0.23211	1.98317	0	0.0699827	0.993	24/88	12.79%	NOD2;FGR;BCL6;BST1;WNT5A;FCGR2B;GATA6;USP18;PTGS2;BIRC3;ADAMTS12;PTGES;IGF2BP1;PTPN22;MYD88;IL1R1;NLRP11;AGTR1;SBNO2;NLRP7;TNFSF4;NLRP4;NLRP14;DHX58	ImmuneCells
295	MSigDB_Hallmark_2020__Apical Junction	-0.213179	-1.98308	0	0.0324567	0.997	87/192	32.04%	ADAMTS5;ACTA1;SPEG;KCNH2;MAPK11;CLDN7;AMIGO2;MYL9;SLIT2;SLC30A3;LAMB3;THY1;CADM3;ACTN2;AMIGO1;CLDN11;ATP1A3;COL16A1;KRT31;VCAM1;ACTC1;PARVA;NECTIN1;CDH1;CALB2;PCDH1;CLDN18;SHROOM2;ICAM5;PPP2R2C;IRS1;COL9A1;CNN2;MADCAM1;MMP2;FLNC;DSC1;ITGA3;CDH4;CX3CL1;PIK3R3;HRAS;WNK4;RRAS;NRXN2;CDH3;ACTG2;CD274;CDH11;CD99;MYH10;NEGR1;RHOF;TMEM8B;YWHAH;VWF;CRAT;PARD6G;CERCAM;EGFR;MDK;ADAM23;ACTN1;ICAM4;JUP;NFASC;…	ImmuneCells
296	GO_Biological_Process_2023__Epithelial Tube Morphogenesis (GO:0060562)	-0.376018	-1.98282	0	0.0323297	0.997	17/31	28.02%	SHH;PKHD1;SLIT2;ACVRL1;MET;GATA3;MESP1;SOX17;PODXL;RASIP1;BMP4;GLI2;SCRIB;CSNK2B;RYR2;RHOB;HES1	ImmuneCells
297	WikiPathway_2023_Human__EPO Receptor Signaling WP581	0.362384	1.98186	0.00238095	0.0699403	0.993	21/26	41.97%	SOCS1;CISH;PTPRU;EPO;STAT1;MAPK3;STAT5A;STAT3;SHC1;IRS2;AKT1;GRB2;PDK1;STAT5B;PTPRC;RASA1;RAF1;JAK2;MAP2K1;SOS1;MAPK1	ImmuneCells
298	GO_Biological_Process_2023__Peripheral Nervous System Development (GO:0007422)	-0.452074	-1.97954	0	0.0328853	0.998	13/19	29.51%	SOX8;EGR2;ADGRB2;GPC1;ADGRG6;GDNF;ERBB3;SCN8A;ASIC2;SERPINI1;NFASC;SOX10;GFRA3	ImmuneCells
299	GO_Molecular_Function_2023__Histone Acetyltransferase Activity (GO:0004402)	0.362351	1.97745	0.00497512	0.0713112	0.997	26/26	63.82%	BAZ1A;BRCA2;TADA2A;KAT2B;NAA50;NCOA3;KAT6A;CREBBP;TAF1;EP300;ATF2;MCM3AP;CLOCK;HAT1;KAT7;USP22;ING3;KAT14;NAA40;TAF9;TAF10;KAT6B;KAT5;SRCAP;NAA60;KAT2A	ImmuneCells
300	GO_Cellular_Component_2023__TIM23 Mitochondrial Import Inner Membrane Translocase Complex (GO:0005744)	-0.495692	-1.97577	0.00340136	0.0335034	0.999	14/15	45.62%	TIMM10;PAM16;TIMM17B;TIMM50;GRPEL2;ROMO1;TIMM23B;SLC25A6;GRPEL1;TIMM17A;TIMM44;DNAJC19;TIMM21;HSPA9	ImmuneCells
301	GO_Biological_Process_2023__Epithelial Cell Development (GO:0002064)	-0.487909	-1.97473	0.0033557	0.0336285	0.999	8/16	9.94%	WNT7A;PKHD1;ROS1;WNT7B;POF1B;GRHL2;WNT5B;BFSP1	ImmuneCells
302	KEGG_2021_Human__Pancreatic cancer	0.247652	1.97362	0	0.0725487	0.998	58/76	48.11%	GADD45B;CDKN1A;TGFB3;PIK3R2;E2F2;VEGFA;E2F1;BAK1;TGFB2;TGFBR1;RAC2;CDK4;RALGDS;GADD45G;MAPK10;STAT1;IKBKG;MAPK3;PLD2;CCND1;CDKN2A;ARAF;STAT3;RB1;BAX;DDB2;AKT1;E2F3;CASP9;BRCA2;NFKB1;CDK6;CDC42;CHUK;AKT2;RALBP1;PIK3CD;PIK3R1;TGFBR2;MTOR;SMAD2;RAF1;RPS6KB1;MAP2K1;PIK3CB;BRAF;POLK;MAPK1;SMAD4;IKBKB;RAC1;MAPK8;MAPK9;ARHGEF6;RALA;KRAS;JAK1;PIK3CA	ImmuneCells
303	GO_Cellular_Component_2023__Cation Channel Complex (GO:0034703)	-0.316342	-1.97348	0.00490998	0.033782	0.999	24/49	24.91%	KCNA5;HTR3B;KCNK1;CASQ2;KCNAB1;KCNA6;HTR3E;CNGA1;FKBP1B;TRPC4;TRPC6;HTR3C;CALM1;SCNN1B;CALM3;TRPC3;SCN2A;SCNN1A;PDE4D;TRPC5;CNGB3;UNC80;RYR2;CALM2	ImmuneCells
304	GO_Biological_Process_2023__Regulation Of Monoatomic Ion Transmembrane Transporter Activity (GO:0032412)	-0.283185	-1.97341	0.0030581	0.0336048	0.999	31/66	25.86%	CRH;FXYD1;SCN2B;SHANK1;SHISA7;CACNG2;SCN3B;CACNG7;PRRT1;MAPK8IP2;CACNG8;PTPN3;HCN1;HCN4;TRPC6;KCNE5;FXYD6;FHL1;HCN2;FXYD7;CACNG3;SHISA9;YWHAH;CHRM3;RELN;STK39;CACNG5;FGF12;RANGRF;OPRM1;CAV3	ImmuneCells
305	GO_Biological_Process_2023__Sensory Perception (GO:0007600)	-0.335195	-1.97319	0.00312989	0.0334463	0.999	24/41	30.45%	CHRNA4;NMB;CHRNB2;CCL2;USH1C;PNOC;SCN10A;OPRK1;PDYN;RETREG1;PRDM12;ALOXE3;ASIC3;TMEM150C;NTSR2;KCNA2;WHRN;CDH23;OPRM1;PCDH15;OR3A2;CCR2;CHRNA7;ADORA2A	ImmuneCells
306	GO_Molecular_Function_2023__G Protein-Coupled Peptide Receptor Activity (GO:0008528)	-0.299932	-1.97067	0	0.0338985	0.999	27/56	19.63%	CCKBR;GALR1;VIPR1;CX3CR1;CYSLTR1;BDKRB2;MCHR1;OPRK1;GIPR;GLP1R;VIPR2;PTH1R;GPR171;NPY1R;NMBR;MCHR2;OPRD1;GPR83;UTS2R;NPR3;KISS1R;NMUR1;NPSR1;GPR37;HCRTR2;MAS1;EDNRA	ImmuneCells
307	GO_Biological_Process_2023__Cellular Response To Ketone (GO:1901655)	0.295779	1.96973	0.00537634	0.0737443	0.998	20/43	21.90%	AQP1;SPP1;SCNN1D;PTGFR;ADCY2;PTGER4;SCNN1G;TRERF1;ADCY3;TNFSF4;AHR;AKR1C3;SLC5A5;ADCY6;CFTR;SPHK2;GAS6;AKR1B1;PCK2;ADAM15	ImmuneCells
308	GO_Molecular_Function_2023__Voltage-Gated Monoatomic Ion Channel Activity (GO:0005244)	-0.395869	-1.9686	0.00352734	0.0342795	0.999	15/26	25.91%	CALHM1;GRIN1;GRIN2C;GRIN2B;CACNA1H;KCNA3;GRIN2A;HCN1;GRIN3A;KCNK15;SCN1A;CACNA1E;KCNJ11;KCND2;HVCN1	ImmuneCells
309	GO_Biological_Process_2023__Sphingosine Metabolic Process (GO:0006670)	0.405115	1.9683	0.00247525	0.0737281	0.998	13/19	28.00%	ACER3;SGPP2;PLPP3;ASAH2;GBA1;SPTLC2;SPHK1;SPHK2;SPTSSA;ACER2;ASAH1;SGPP1;NAAA	ImmuneCells
310	GO_Molecular_Function_2023__Voltage-Gated Calcium Channel Activity (GO:0005245)	-0.324499	-1.96726	0.00485437	0.0344005	0.999	24/45	25.30%	CACNA1S;CACNA1G;SCN5A;CACNA2D2;SCN10A;CACNG2;CACNG7;CACNG8;CACNA1H;CACNA1I;SCN2A;SCN3A;CACNG3;CACNB2;SCN8A;NCS1;SCN4A;SCN1A;CACNA1E;CACNG5;CACNB4;CACNA2D1;OPRM1;CACNA2D3	ImmuneCells
311	GO_Biological_Process_2023__Negative Regulation Of Epithelial To Mesenchymal Transition (GO:0010719)	-0.377469	-1.96657	0.00167785	0.0343808	0.999	16/27	29.26%	VASN;SPRED3;ZNF750;GATA3;SDHAF2;SFRP2;EPHA4;BMP5;OVOL2;MARK1;SPRY1;FUZ;HPN;PPP2CA;SFRP1;MAD2L2	ImmuneCells
312	GO_Molecular_Function_2023__Chloride Channel Activity (GO:0005254)	-0.288148	-1.96447	0.00486224	0.0347531	0.999	29/60	25.34%	FXYD1;CLCA4;ANO9;GABRA6;GLRA3;GABRG3;GLRB;GABRA1;GABRA4;SLC17A6;CLCN1;ANO5;GABRG2;GABRA5;SLC17A7;GABRA3;GABRB3;TTYH1;GLRA2;GABRB2;GABRA2;GABRG1;GABRB1;KCNT2;SLC17A8;CLCNKA;ANO3;CLDN4;GLRA1	ImmuneCells
313	WikiPathway_2023_Human__Complement And Coagulation Cascades WP558	0.283725	1.96443	0.00810811	0.0750151	0.998	23/52	19.81%	CFB;THBD;C7;F5;CR1;SERPINA1;TFPI;SERPINE1;F10;SERPINC1;C1R;CPB2;C5AR1;F3;CFD;PLAUR;SERPINF2;C1QC;C1QA;SERPING1;C1QB;PROS1;CD55	ImmuneCells
314	GO_Biological_Process_2023__Cellular Response To Decreased Oxygen Levels (GO:0036294)	0.248123	1.96416	0.00549451	0.0745583	0.998	32/72	25.34%	MGARP;ADAM8;AQP1;CPEB4;GATA6;NDNF;PTGS2;NKX3-1;HMOX1;EPAS1;MYC;HILPDA;VEGFA;HIF1A;SUV39H1;CPEB1;AQP3;EGLN2;EGLN3;PPARG;FABP1;EGLN1;NDRG1;NOP53;BMP7;AK4;NOTCH1;SUV39H2;HIPK2;TBL2;P4HB;PICK1	ImmuneCells
315	GO_Biological_Process_2023__Cell-Cell Junction Organization (GO:0045216)	-0.285033	-1.96275	0.00313972	0.0350362	0.999	36/66	32.10%	CLDN1;TJP3;CDH13;PRTN3;F2R;PKHD1;GJC1;MARVELD2;LIMS2;MARVELD3;CDH7;CDH1;CDH17;TRPV4;CDH4;ARVCF;CDH22;CDH2;CDH3;CDH11;CDHR3;CDH9;NLGN4X;PARD6A;OCLN;CDH12;CDH6;CTNND2;PARD6B;CDH18;FSCN1;CDH10;F2RL1;CDH8;CDH15;PKP3	ImmuneCells
316	GO_Biological_Process_2023__NIK/NF-kappaB Signaling (GO:0038061)	0.322831	1.96175	0.00258398	0.0749744	0.998	30/32	58.63%	CHI3L1;CARD10;BIRC3;TNFSF15;RELB;NFKB2;TNFRSF10A;IRAK1;REL;TLR3;NFKBIA;NFKB1;ZFP91;TNFRSF10B;CHUK;TAB3;TLR6;DICER1;AMFR;BIRC2;MAP3K7;BTRC;CREBBP;TAB2;TRAF6;MALT1;MAP3K14;TIRAP;RELA;COPS8	ImmuneCells
317	KEGG_2021_Human__Viral protein interaction with cytokine and cytokine receptor	0.253754	1.95912	0	0.0755645	0.999	28/69	17.92%	ACKR3;CXCL1;CXCR4;CXCL3;CCL8;IL18R1;IL2RG;TNFSF14;CXCL2;CCL3;CCL5;IL34;IL10;CCR3;CCR7;IL2RA;CCL20;CCR4;TNFRSF10C;CXCL5;CCR5;ACKR4;CXCR2;IL20RB;TNFRSF14;TNFRSF10A;IL10RA;IL10RB	ImmuneCells
318	GO_Biological_Process_2023__Cellular Response To Lipopolysaccharide (GO:0071222)	0.215064	1.95693	0	0.0762087	0.999	48/107	28.29%	NOD2;BPI;GBP2;CXCL1;WNT5A;CD80;CXCL3;NUGGC;CXCL2;IRGM;CCL3;CCL5;SERPINE1;ZFP36;IL10;ZC3H12A;CD68;PTPN22;MYD88;SBNO2;TNFAIP3;CACTIN;CD14;CXCL5;NLRP7;TNFSF4;CCR5;DAB2IP;VIM;NFKBIB;GBP3;LILRB1;HMGB2;PRKCE;CASP1;CARD16;IRAK1;XBP1;EHHADH;TNFRSF1B;PDCD1LG2;LY96;CD86;CASP7;ADAM9;CTR9;AXL;NFKB1	ImmuneCells
319	GO_Biological_Process_2023__Establishment Of Epithelial Cell Polarity (GO:0090162)	0.423755	1.95659	0.00490196	0.0757045	0.999	18/18	57.67%	FERMT1;PARD3;SYNE4;CYTH1;FBF1;SH3BP1;GOLPH3;EZR;CDC42;MSN;OPHN1;SIPA1L3;MYO9A;RAP2A;RHOA;MYO18A;SIPA1;CYTH3	ImmuneCells
320	WikiPathway_2023_Human__Striated Muscle Contraction Pathway WP383	-0.358072	-1.95659	0.0015748	0.0364069	1	22/34	33.35%	ACTA1;MYL9;ACTN2;TCAP;TNNI2;ACTC1;TNNI3;TNNT1;MYOM1;MYBPC1;MYL4;TNNT2;MYBPC2;ACTN3;TTN;DMD;TPM1;TPM2;ACTG1;DES;TNNT3;TNNC1	ImmuneCells
321	KEGG_2021_Human__Cell adhesion molecules	-0.22588	-1.95594	0.00446429	0.0363329	1	75/138	36.06%	CLDN1;ICOS;MAG;CD40LG;CD28;SDC1;ITGB7;CLDN7;CADM3;CLDN16;CD6;CLDN11;CLDN34;VCAM1;CD8B;NTNG1;NECTIN1;CDH1;CTLA4;CNTNAP1;L1CAM;CLDN18;CD8A;CLDN23;JAM2;ITGA8;MADCAM1;CDH4;PTPRF;TIGIT;LRRC4B;NRXN2;CDH2;CD2;CDH3;ICAM3;CD274;CD99;CD22;NEGR1;SELE;NCAM1;NLGN4X;CLDN10;SELL;MPZ;OCLN;NFASC;CLDN4;NRXN1;NRXN3;CNTN1;CNTNAP2;CLDN14;NTNG2;HLA-DRB5;NRCAM;HLA-DQA2;CD8B2;LRRC4C;JAM3;SDC3;SELPLG;NLGN3;CNTN2;CDH15;NC…	ImmuneCells
322	WikiPathway_2023_Human__Dravet Syndrome WP5200	-0.380335	-1.95579	0.00534759	0.0361836	1	15/28	24.66%	MAPK11;SCN2B;SCN3B;CAMK2A;HCN1;TNF;CALM1;SCN2A;KCNA2;SCN3A;SCN8A;STXBP1;PCDH19;SCN1A;MLST8	ImmuneCells
323	GO_Biological_Process_2023__Cell Junction Organization (GO:0034330)	-0.290161	-1.95398	0	0.036222	1	31/61	30.03%	CLDN1;TJP3;CBLN1;PKHD1;WNT7B;MARVELD2;GRHL2;LIMS2;SNCB;MARVELD3;PTK7;SEMA3E;L1CAM;MAPT;SLC8A3;ELFN1;SLC6A1;PAK3;GRM5;SNCG;CBLN2;NLGN4X;PPFIA3;OCLN;CTNND2;AJM1;APBB2;RAB39B;CHRNA7;PIN1;NLGN3	ImmuneCells
324	GO_Biological_Process_2023__Long-Term Synaptic Potentiation (GO:0060291)	-0.432827	-1.95276	0.00352113	0.0363078	1	13/20	27.31%	FOXM1;NFATC4;GRIN2C;GRIN2B;GRIN2A;SLC24A2;VAMP2;SLC8A3;SHANK2;PLK2;RGS14;NOL3;PRKCZ	ImmuneCells
325	GO_Molecular_Function_2023__Cholesterol Transfer Activity (GO:0120020)	0.433839	1.95267	0.00941176	0.0764886	0.999	10/16	23.39%	APOA1;PLTP;ABCG8;GRAMD1C;CETP;STARD5;GRAMD1A;TSPO;ABCG1;NPC2	ImmuneCells
326	GO_Biological_Process_2023__Muscle Tissue Development (GO:0060537)	-0.350556	-1.95178	0.00170068	0.0363458	1	19/32	30.07%	SHH;CAV1;MSC;MYOZ2;IGSF8;MYL6B;CSRP2;SRPK3;SMO;POPDC3;MYH7B;PGM5;POPDC2;DMD;ZBTB18;BVES;MYL11;MYL6;STRA6	ImmuneCells
327	GO_Biological_Process_2023__Positive Regulation Of Lipid Storage (GO:0010884)	0.408474	1.95138	0.00742574	0.0765655	0.999	9/19	13.58%	PLA2G10;PLIN5;HILPDA;ZC3H12A;FITM1;PLIN2;EHD1;MSR1;IKBKE	ImmuneCells
328	GO_Biological_Process_2023__Sprouting Angiogenesis (GO:0002040)	-0.304459	-1.94744	0.00154321	0.0372694	1	26/52	26.34%	CDH13;KDR;YJEFN3;SLIT2;EGR3;RAMP2;TEK;EFNB2;PARVA;SEMA3E;ADTRP;NELL1;E2F7;FGF2;EPHB4;PIK3R3;BMP4;SEMA5A;PGF;NR4A1;GREM1;ADGRA2;E2F8;VEGFC;GPLD1;NAXE	ImmuneCells
329	WikiPathway_2023_Human__Selective Expression Of Chemokine Receptors During T Cell Polarization WP4494	0.361383	1.94726	0.00699301	0.0776957	0.999	11/25	12.69%	IL4R;CXCR4;IL18R1;CCL3;TGFB3;CCR3;CCR7;CCR4;TGFB2;IL5;CCR5	ImmuneCells
330	GO_Biological_Process_2023__Chloride Transmembrane Transport (GO:1902476)	-0.309148	-1.94677	0.00322061	0.0372943	1	22/48	20.17%	ANO9;GABRA6;GLRA3;GABRG3;GLRB;GABRA1;GABRA4;CLCN1;ANO5;SLC12A5;GABRG2;GABRA5;GABRA3;GABRB3;GLRA2;ANO4;GABRB2;SLC6A1;GABRA2;GABRG1;SLC4A1;GABRB1	ImmuneCells
331	GO_Biological_Process_2023__Cellular Response To Hypoxia (GO:0071456)	0.24432	1.94591	0.00817439	0.0777325	0.999	28/71	20.99%	MGARP;ADAM8;AQP1;GATA6;NDNF;PTGS2;NKX3-1;HMOX1;EPAS1;MYC;HILPDA;VEGFA;HIF1A;SUV39H1;CPEB1;AQP3;EGLN2;PLK3;EGLN3;PPARG;FABP1;EGLN1;NDRG1;NOP53;BMP7;AK4;NOTCH1;SUV39H2	ImmuneCells
332	MSigDB_Hallmark_2020__IL-2/STAT5 Signaling	0.178154	1.9456	0	0.0772392	0.999	76/196	25.62%	IL1R2;PIM1;TNFSF11;MAP3K8;SOCS1;IGF2R;IL4R;GADD45B;PLSCR1;IL1RL1;LIF;SLC2A3;CD44;IL18R1;TNFRSF9;ETV4;TGM2;RGS16;SPP1;SCN9A;CISH;GPR65;IFITM3;IL3RA;SERPINC1;IKZF2;GLIPR2;MYC;CD48;IL10;SELP;ETFBKMT;MUC1;EMP1;IRF4;PLIN2;BATF;ITGAV;NOP2;CST7;PENK;IL2RA;CCR4;NRP1;AHR;BHLHE40;MYO1E;NFIL3;ENO3;LTB;CCND3;IL10RA;SLC39A8;SYNGR2;NDRG1;FURIN;ALCAM;FAH;NFKBIZ;ENPP1;PNP;RRAGD;CDCP1;GBP4;PUS1;SLC1A5;KLF6;XBP1;T…	ImmuneCells
333	WikiPathway_2023_Human__Development Of Ureteric Collection System WP5053	-0.294951	-1.94449	0.00304878	0.0377179	1	34/57	34.21%	SHH;FST;GFRA1;SLIT2;FOXC1;GATA3;HNF1B;BMP2;RET;ITGA8;PBX1;GDNF;FAT4;BMP4;FRAS1;BMP5;GRIP1;GLI2;ROBO2;RARA;RARB;FREM1;SMAD1;SPRY1;VANGL2;SMO;FGFR2;GPC3;PAX2;RARG;SALL1;CELSR1;SIX2;WNT11	ImmuneCells
334	GO_Biological_Process_2023__Positive Regulation Of Mitotic Nuclear Division (GO:0045840)	-0.360852	-1.9435	0	0.0378319	1	15/32	21.63%	CDC20;CD28;EPGN;IGF1;IGF2;IL1B;EDN3;IL1A;BTC;DMRT1;DLGAP5;DRD3;ESPL1;LRP5;EGF	ImmuneCells
335	GO_Biological_Process_2023__Visual System Development (GO:0150063)	0.317884	1.94275	0	0.0781319	0.999	15/34	19.12%	SH3PXD2B;SIX3;SCO2;CPAMD8;ADAMTS18;SLC39A5;FREM2;PBX4;BMPR1B;TGFB2;BLOC1S3;SOX2;C1QA;CHRDL1;ZDHHC16	ImmuneCells
336	GO_Cellular_Component_2023__Brush Border Membrane (GO:0031526)	0.325564	1.94233	0	0.0777412	0.999	16/33	19.97%	SLC9A3;CD36;CDHR2;AQP1;ACE2;SLC11A2;SLC28A3;SLC5A1;LRP2;SLC28A2;AQP8;PDZK1;SLC28A1;SLC7A9;ATP6V0A4;LIMA1	ImmuneCells
337	GO_Biological_Process_2023__Cholesterol Efflux (GO:0033344)	0.4017	1.94011	0.00947867	0.0782558	0.999	11/18	24.15%	APOA1;ABCA7;ABCG8;ABCG4;APOC1;ABCA8;ABCA5;ABCG1;APOE;NPC2;SOAT1	ImmuneCells
338	GO_Biological_Process_2023__Synaptic Vesicle Exocytosis (GO:0016079)	-0.3357	-1.93851	0.00160772	0.0390998	1	18/39	19.19%	CDK5;SYT5;UNC13A;SYT10;CPLX1;UNC13C;STX1B;SNAP25;RAB3A;SYT7;CPLX2;PRRT2;SNPH;STX1A;SYT2;VAMP2;SYT4;SYT1	ImmuneCells
339	KEGG_2021_Human__RNA degradation	0.245708	1.93755	0.0028169	0.0788409	0.999	71/75	67.37%	PNLDC1;PABPC1L2A;EXOSC4;PFKP;ENO3;EDC4;ENO4;CNOT3;NUDT16;ENO1;EXOSC9;PABPC1L;PFKL;MPHOSPH6;XRN2;PNPT1;BTG1;DCPS;DCP1B;PABPC4;DIS3L;EXOSC2;EXOSC10;XRN1;CNOT8;TENT4A;EXOSC1;DIS3;TENT4B;CNOT10;CNOT9;CNOT2;EXOSC7;PABPC1;ZCCHC7;MTREX;DCP1A;DHX36;DCP2;CNOT4;CNOT1;DDX6;PAN3;PARN;CNOT6;LSM8;CNOT6L;PATL1;BTG3;C1D;EXOSC3;CNOT7;EXOSC6;EXOSC8;HSPA9;EDC3;LSM6;HSPD1;TOB1;PAN2;LSM7;LSM1;PFKM;LSM5;TOB2;BTG2;PABP…	ImmuneCells
340	GO_Molecular_Function_2023__Amino Acid:Sodium Symporter Activity (GO:0005283)	-0.468577	-1.93731	0.00352734	0.0392323	1	8/16	10.41%	SLC6A12;SLC38A3;SLC1A6;SLC38A4;SLC6A20;SLC6A11;SLC6A7;SLC38A1	ImmuneCells
341	GO_Biological_Process_2023__Regulation Of Membrane Depolarization (GO:0003254)	-0.426087	-1.93727	0.00519031	0.0390551	1	12/20	25.86%	SCN5A;SCN2B;SCN10A;SCN3B;PTPN3;GJA5;HCN1;HCN4;FHL1;HCN2;RANGRF;CAV3	ImmuneCells
342	WikiPathway_2023_Human__IL 7 Signaling Pathway WP205	0.391439	1.93696	0.00493827	0.0784824	0.999	11/20	26.71%	JAK3;IL2RG;IL7;PIK3R2;IL7R;STAT1;MAPK3;STAT5A;STAT3;PTK2B;AKT1	ImmuneCells
343	WikiPathway_2023_Human__Complement Activation WP545	0.417579	1.93692	0.00498753	0.0779757	0.999	11/18	23.08%	CFB;C7;CFP;C1R;CFD;C1QC;C1QA;C1QB;CD55;C5;C1S	ImmuneCells
344	GO_Molecular_Function_2023__Voltage-Gated Sodium Channel Activity (GO:0005248)	-0.436075	-1.93326	0.00346021	0.0400364	1	13/19	28.55%	SCN5A;SCN2B;SCN10A;SCN3B;HCN4;SCN2A;SCN3A;HCN2;SCN8A;SCN4A;SCN1A;NALCN;TPCN1	ImmuneCells
345	GO_Biological_Process_2023__Negative Regulation Of Inflammatory Response (GO:0050728)	0.221436	1.93223	0	0.0797868	0.999	42/98	25.30%	SLAMF8;FGR;APOA1;MEFV;CD200R1;GPER1;IRGM;FPR2;NR1H4;KLF4;NLRP12;CDH5;IL33;TNFAIP8L2;IL10;PTPN2;PTGER4;METRNL;TNFAIP6;TNFAIP3;AHR;CXCL17;GBA1;PPARG;PPARD;IL10RA;SLC39A8;GHRL;FURIN;YES1;MFHAS1;PTPN6;APOE;SIGLEC10;AOAH;RPS19;TNFRSF1B;HLA-DRB1;MVK;STAT3;RB1;RHBDF2	ImmuneCells
346	WikiPathway_2023_Human__Microglia Pathogen Phagocytosis Pathway WP3937	0.293943	1.93181	0.00763359	0.0794859	0.999	33/40	49.98%	TREM1;VAV3;FCGR1A;PIK3R2;SIGLEC7;RAC2;FCER1G;C1QC;C1QA;C1QB;PTPN6;NCF4;ARPC1B;CYBA;CYBB;NCF2;ITGB2;HCK;PIK3CD;PIK3R1;LYN;NCKAP1L;PIK3C3;PIK3CB;PIK3C2A;SYK;RAC1;VAV1;ITGAM;VAV2;PIK3CA;PLCG2;PIK3R6	ImmuneCells
347	GO_Biological_Process_2023__Positive Regulation Of Interleukin-17 Production (GO:0032740)	0.388556	1.93103	0.00472813	0.0792829	0.999	7/20	7.73%	IL15;NOD2;OSM;SLAMF6;SLC7A5;NR1H4;MYD88	ImmuneCells
348	GO_Biological_Process_2023__Regulation Of Transcription Elongation By RNA Polymerase II (GO:0034243)	0.241444	1.931	0	0.0787658	0.999	66/76	58.35%	BTBD18;INTS5;SIRT6;ELL2;MED26;MED18;MED22;INTS11;MED16;INTS7;SUPT6H;INTS13;INTS10;WDR43;INTS14;INTS1;EAF2;ELL;MED6;CCNK;MED27;INTS2;MED15;MED1;INTS9;CDC73;TCERG1;NCBP1;CDK12;MED4;ZMYND8;INTS8;MED14;INTS4;HNRNPU;CDK13;MED23;MED28;LARP7;INTS6;NELFCD;VHL;CCNT1;NELFA;PWWP2A;MED10;RNF168;INTS12;RNF8;LDB1;MED21;NCBP2;MED17;INTS3;MED9;ZMYND11;SUPT5H;EAPP;MED30;PARP1;MED29;RECQL5;CDK9;MED7;LEO1;NELFE	ImmuneCells
349	GO_Biological_Process_2023__Regulation Of Organelle Assembly (GO:1902115)	0.237846	1.92982	0.00568182	0.0788295	0.999	64/73	58.90%	TBC1D8;TBC1D14;TBC1D10C;TBC1D16;SGSM3;STIL;MAPK15;TBC1D10A;TBC1D2B;CEP295NL;TBC1D2;EFNB1;VPS11;TBC1D13;IFT140;CDKL1;IFT20;RABEP2;TBC1D10B;CEP76;IFT88;EZR;CEP295;TBC1D15;STX18;TBC1D9B;MSN;HCK;GSN;ATG3;CYLD;RNF4;ATG5;NF2;PDCD6IP;TBC1D1;TSG101;PIKFYVE;TRAPPC12;SDCCAG8;RABGAP1;EVI5;MTMR3;SENP6;RAB5A;WDPCP;RDX;TBC1D5;TBC1D22B;TBC1D22A;STAM;TBC1D12;NPM1;TBC1D20;EPHB2;DYNC2LI1;CDKL5;CENPJ;ARHGEF9;UBQLN2…	ImmuneCells
350	KEGG_2021_Human__Protein digestion and absorption	0.220278	1.92876	0	0.0789107	0.999	32/87	17.48%	COL28A1;SLC9A3;COL8A1;SLC16A10;SLC8A2;COL17A1;COL4A2;COL7A1;SLC36A1;COL6A2;ACE2;COL27A1;COL4A1;CPB2;KCNJ13;COL23A1;SLC1A1;MME;MEP1B;SLC15A1;SLC36A3;COL1A1;KCNN4;ATP1B2;MEP1A;XPNPEP2;COL10A1;SLC7A9;FXYD2;COL22A1;ATP1A2;COL20A1	ImmuneCells
351	GO_Biological_Process_2023__Inorganic Cation Transmembrane Transport (GO:0098662)	-0.196706	-1.92756	0	0.0415297	1	79/262	16.56%	KCNA5;CACNA1S;KCNS2;CACNA1G;KCNK2;SLC39A1;KCNH2;SLC40A1;SCN5A;LRRC55;CACNG1;SLC6A12;KCNA7;HTR3B;SLC30A3;KCNG1;ATP4A;KCNK1;ATP12A;SCN2B;KCNK3;SCN10A;KCNV1;SLC30A8;SCN3B;TRPM5;SLC39A4;KCNA6;KCNK12;KCNA4;HTR3E;SCARA5;KCNH4;SLC6A17;ASIC1;ATP1A3;SLC6A20;SLC6A11;ATP6V1F;KCNS3;KCNH6;KCNB1;CACNA1H;KCNH3;SLC6A9;ABCC9;SLC9A2;SLC24A3;KCNG3;KCNA3;SLC6A7;HCN1;KCNF1;TRPC4;KCNN1;HCN4;TRPC6;SLC9A4;OTOP3;HTR3C;TR…	ImmuneCells
352	GO_Biological_Process_2023__Positive Regulation Of Fibroblast Proliferation (GO:0048146)	0.34924	1.92508	0.00700935	0.0786429	1	13/26	20.75%	WNT5A;AQP1;CDKN1A;WNT2;MYC;E2F1;AMH;CDK4;PDGFA;SPHK1;PLA2G2C;DDR2;GAS6	ImmuneCells
353	GO_Biological_Process_2023__Regulation Of Macrophage Chemotaxis (GO:0010758)	0.402821	1.92217	0.00684932	0.0790401	1	12/20	25.97%	SLAMF8;MSTN;THBS1;CCL5;IL34;CXCL17;AMH;MAPK3;C5;CMKLR1;PTK2;PTK2B	ImmuneCells
354	GO_Biological_Process_2023__Mitochondrial Gene Expression (GO:0140053)	-0.246101	-1.92207	0.00300752	0.043005	1	80/103	55.34%	NDUFA7;MRPL40;POLRMT;MRPL38;MRPL54;MRPL12;MRPL51;MRPL10;MRPL27;MRPL28;MRPL24;MRPL23;MRPS33;MRPS17;CHCHD1;GADD45GIP1;MRPL55;MRPL17;MRPL36;MRPL9;MRPL34;MRPS15;MRPS7;MRPL57;FASTK;MRPL11;MRPL14;MRPS28;MRPL2;MRPL35;MRPL41;MRPL30;FASTKD3;MRPL21;MRPL43;MRPL4;MRPS12;MRPS6;MRPS34;MRPS18A;MRPS14;MRPL16;MRPL50;MRPL44;MRPL33;MRPL20;MRPL52;MRPL37;MRPL58;MRPS16;MRPL47;TFAM;MRPS18C;MRPS23;MRPL42;MRPS10;MRPL48;M…	ImmuneCells
355	GO_Biological_Process_2023__Positive Regulation Of Interferon-Beta Production (GO:0032728)	0.311908	1.92117	0.00987654	0.0790285	1	34/35	65.22%	TLR2;OAS3;OAS2;ISG15;IRF7;TLR8;IRF1;POLR3B;POLR3F;TLR3;IFIH1;RIGI;IRF5;POLR3G;FLOT1;RNF135;TRIM56;MAVS;RIPK2;POLR3C;TBK1;DHX9;RIOK3;PTPN11;POLR3A;DDX3X;TOMM70;TLR7;OAS1;POLR3D;STING1;TLR4;IRF3;TRIM65	ImmuneCells
356	GO_Biological_Process_2023__Bicellular Tight Junction Assembly (GO:0070830)	-0.326928	-1.92046	0.00325203	0.0432299	1	19/39	25.66%	CLDN1;CLDN7;POF1B;MARVELD2;GRHL2;CLDN16;FRMPD2;CLDN11;RAMP2;CLDN34;MARVELD3;CLDN18;CLDN23;OCEL1;ARL2;CLDN10;OCLN;CLDN4;CLDN14	ImmuneCells
357	WikiPathway_2023_Human__Disruption Of Postsynaptic Signaling By CNV WP4875	-0.360942	-1.92011	0.00338409	0.0429132	1	17/33	24.94%	ARC;SHANK1;GRIN1;GRIN2C;GRIN2B;CAMK2A;GRIN2A;CAMK2B;RPH3A;STX1A;NRXN2;NLGN4X;GRM1;DLGAP1;RYR2;NRXN1;NRXN3	ImmuneCells
358	GO_Biological_Process_2023__Cellular Response To Nerve Growth Factor Stimulus (GO:1990090)	-0.419768	-1.9187	0.00692042	0.0431318	1	13/20	33.23%	BDNF;NGF;STMN2;WASF1;NTRK1;MAPT;NTRK3;MAGI2;SH3GL2;TMEM108;NTRK2;CIB1;NTF3	ImmuneCells
359	GO_Cellular_Component_2023__Organelle Inner Membrane (GO:0019866)	-0.179831	-1.91813	0	0.0431492	1	218/380	45.54%	ALAS2;CYP24A1;NDUFA7;SLC25A18;GCAT;MRPL40;CYP1A1;MRPL38;MRPL54;MRPL12;SLC25A22;COX8A;CKMT1A;COX16;TM7SF2;ATP5MGL;TMEM160;NDUFA4;NDUFB5;COA3;MRPL51;SLC25A4;DPY19L2;ATP5MC1;MRPL10;NDUFB11;ATP5MC3;AURKAIP1;ATP5PF;PDE2A;NDUFAB1;COX5A;CYCS;MICOS13;MRPL27;MRPL28;SLC25A29;NDUFB10;MRPL24;NDUFB2;COX6A1;SLC30A2;HIGD1A;SLC25A10;MRPL23;SMDT1;COX5B;NDUFC2;PLA2G4B;SLC9B2;MRPS33;TIMM10;CKMT2;MRPS17;CHCHD1;ENDOG…	ImmuneCells
360	GO_Molecular_Function_2023__Serine-Type Peptidase Activity (GO:0008236)	-0.244596	-1.91645	0.00151286	0.0435051	1	56/101	33.98%	DPP4;TMPRSS4;PRTN3;PRSS16;RHBDL1;F12;MMP11;GZMB;F7;PCSK1;KLK10;PRSS38;PRSS3;KLK7;RHBDF1;F2;HPR;PRSS53;PCSK2;CELA1;GZMK;PRSS56;TLL1;MMP2;PROC;CTSV;KLK5;MASP1;PLAU;ENDOU;HABP2;KLK6;PLG;GZMH;PCSK4;CELA2A;TLL2;HGFAC;GZMM;HPN;CNTN1;PCSK6;ELANE;KLK14;CLPP;HTRA2;PLAT;NAALAD2;APEH;MMP9;RHBDD3;PRSS54;RHBDL2;CTRL;CELA2B;MASP2	ImmuneCells
361	GO_Biological_Process_2023__Regulation Of Telomere Maintenance Via Telomerase (GO:0032210)	0.270478	1.91535	0.00552486	0.0814781	1	47/51	61.21%	AURKB;STON1;PIF1;MAPK15;TINF2;MAPK3;PNKP;SMG5;HNRNPA1;NAT10;FBXO4;MAP2K7;TERF2;EXOSC10;ATR;XRN1;POT1;MAPKAPK5;TENT4B;CTNNB1;DCP2;TNKS;HMBOX1;TNKS2;HNRNPU;XRCC5;HNRNPC;MAPK1;SMG6;MAP3K4;PARN;NEK7;GNL3L;ATM;CTC1;TNIP1;TERF1;TCP1;CCT4;CCT2;CCT6A;PRKCQ;CCT7;CCT8;CCT3;SRC;CCT5	ImmuneCells
362	GO_Molecular_Function_2023__High Voltage-Gated Calcium Channel Activity (GO:0008331)	-0.400905	-1.91441	0.00668896	0.0440693	1	14/23	23.19%	CACNA1S;CACNA1G;SCN5A;SCN10A;CACNA1H;CACNA1I;SCN2A;SCN3A;CACNB2;SCN8A;SCN4A;SCN1A;CACNA1E;CACNB4	ImmuneCells
363	GO_Biological_Process_2023__Central Nervous System Neuron Differentiation (GO:0021953)	-0.383036	-1.9143	0.00683761	0.0438929	1	15/26	28.94%	CBLN1;NPY;KNDC1;NOVA2;MAPT;MDGA1;BRINP3;NR4A2;SPOCK1;FAIM2;CEND1;GET1;MAP2;NTRK2;GRID2	ImmuneCells
364	GO_Biological_Process_2023__Regulation Of Release Of Sequestered Calcium Ion Into Cytosol (GO:0051279)	-0.307297	-1.91412	0.00846024	0.0437607	1	25/47	29.15%	F2R;THY1;CASQ2;JPH4;CASQ1;DHRS7C;F2;FKBP1B;TRDN;JPH1;JPH3;CALM1;DRD1;CALM3;CX3CL1;JSRP1;PDE4D;NPSR1;JPH2;CD19;CALM2;CXCL10;DMD;CXCL11;FKBP1A	ImmuneCells
365	GO_Biological_Process_2023__Positive Regulation Of Dendrite Extension (GO:1903861)	-0.469403	-1.91389	0.00696864	0.0436404	1	10/16	26.90%	UNC13A;CPNE6;SYT3;SYT2;SYT4;SYT1;CPNE9;RIMS2;RASAL1;RIMS1	ImmuneCells
366	WikiPathway_2023_Human__Nuclear Receptors Meta Pathway WP2882	0.16853	1.91302	0	0.081963	1	87/276	19.82%	FKBP5;VDR;ACKR3;SLC5A8;APOA1;THBD;GADD45B;CES5A;PDK4;ESR1;ANGPTL4;SLC2A3;SLC2A6;CPEB4;CYP1B1;PLTP;SERPINA1;EPHA2;SNAI2;SLC7A5;SLC5A9;PTGS2;BIRC3;IL17B;CDK1;ABCG8;SLC39A12;HMOX1;SLC6A4;SRPX2;NR1H4;SLC39A5;TGFBR3;FGF13;MYC;CYP3A4;ETNK2;RGS2;SLC6A13;SOD3;HBEGF;SLC2A12;SLC2A14;TNFAIP3;CCL20;TSC22D3;PPARGC1A;SLC5A1;NR1I3;TGFB2;PPP1R14C;AHR;ALDH3A1;CYP4F12;PMP2;BHLHE40;CDK4;POU5F1;MFGE8;CPT1A;SLC5A10;G…	ImmuneCells
367	GO_Molecular_Function_2023__Glucose Transmembrane Transporter Activity (GO:0005355)	0.374019	1.91251	0.00229885	0.0816834	1	12/22	18.84%	SLC2A3;SLC2A6;SLC5A9;SLC2A12;SLC2A14;SLC5A1;SLC5A10;SLC45A2;SLC2A1;SLC2A5;SLC5A11;SLC2A9	ImmuneCells
368	GO_Biological_Process_2023__Positive Regulation Of Vasculature Development (GO:1904018)	0.216205	1.90949	0.00643087	0.0826149	1	27/100	11.44%	LRG1;CHI3L1;THBS1;WNT5A;ANGPTL4;EMILIN2;AQP1;CYP1B1;SMOC2;APLNR;GATA6;SERPINE1;HMOX1;EMP2;PRKD1;NODAL;CDH5;VEGFA;CCR3;ZC3H12A;HIF1A;GATA2;VASH2;NOS3;CD34;EPHA1;VEGFD	ImmuneCells
369	KEGG_2021_Human__Maturity onset diabetes of the young	-0.427207	-1.90854	0.0034662	0.0451406	1	15/19	36.71%	HNF4A;GCK;NEUROD1;HNF4G;HNF1B;PAX6;HNF1A;SLC2A2;NKX2-2;PKLR;ONECUT1;HES1;MAFA;NKX6-1;IAPP	ImmuneCells
370	GO_Biological_Process_2023__Tight Junction Assembly (GO:0120192)	-0.311551	-1.90748	0.00638978	0.045313	1	21/44	25.66%	CLDN1;CLDN7;POF1B;MARVELD2;GRHL2;CLDN16;FRMPD2;CLDN11;RAMP2;CLDN34;MARVELD3;CLDN18;CLDN23;MPDZ;OCEL1;ARL2;ILDR1;CLDN10;OCLN;CLDN4;CLDN14	ImmuneCells
371	GO_Biological_Process_2023__Negative Regulation Of Supramolecular Fiber Organization (GO:1902904)	-0.267884	-1.90711	0.00321543	0.0452291	1	37/71	36.82%	SPEF1;SLIT2;SHANK1;TRIM54;CKAP2;LDLR;HSPA8;STMN2;APC2;CLIP3;TUBB4A;PFN2;KANK3;SHANK3;CRYAB;PLEKHH2;KATNB1;PFDN5;STMN1;EMILIN1;BMERB1;CHADL;ARPIN;PFDN6;CAV3;MAP2;HIP1R;CIB1;CLU;PFN1;HDGFL3;MYADM;EML2;TWF2;VBP1;IAPP;SSH3	ImmuneCells
372	GO_Biological_Process_2023__Regulation Of Tyrosine Phosphorylation Of STAT Protein (GO:0042509)	0.273047	1.90481	0	0.0847436	1	18/50	15.32%	SOCS3;IL15;SOCS1;OSM;LIF;PARP9;CCL5;FGFR3;PTPN2;FLT3;VEGFA;EPO;HCLS1;PARP14;IL23A;PTK6;CRLF1;CLCF1	ImmuneCells
373	GO_Cellular_Component_2023__Collagen-Containing Extracellular Matrix (GO:0062023)	-0.1847	-1.90442	0	0.0458545	1	162/332	33.10%	MGP;CDH13;PRTN3;CBLN1;GDF10;SHH;POSTN;VWA1;F12;ITIH5;MMP28;ADAMTS8;LAMA1;COL1A2;COL6A1;F7;LAMB3;COL5A3;LGALS1;MFAP5;CBLN4;COL4A6;COL13A1;PXDN;FCN1;FBLN1;BGN;MMRN1;MUC17;COL3A1;WNT5B;NID2;COL9A3;AZGP1;CLEC14A;NPPA;ADAMTS1;ADAM11;FREM3;COL16A1;KNG1;LOXL4;PZP;FBLN2;CCN2;ACAN;EGFL7;LAMA4;COL4A5;KAZALD1;GPC1;RARRES2;PRELP;COL12A1;P3H2;F2;ADAM19;L1CAM;AMBP;PCOLCE;TGFB1I1;COL21A1;ITIH1;COL4A3;ECM1;ADAMT…	ImmuneCells
374	GO_Biological_Process_2023__Regulation Of Type I Interferon-Mediated Signaling Pathway (GO:0060338)	0.327671	1.90165	0.00757576	0.0859326	1	14/32	22.12%	NLRC5;WNT5A;TRIM6;DCST1;USP18;PTPN2;OAS3;IGF2BP1;ISG15;IKBKE;PTPN1;TTLL12;PTPN6;STAT2	ImmuneCells
375	MSigDB_Hallmark_2020__p53 Pathway	0.175976	1.90087	0	0.085829	1	75/196	25.76%	ST14;VDR;ALOX15B;SOCS1;NUPR1;ZBTB16;LIF;DDIT4;IFI30;EPHA2;S100A4;RGS16;CDKN1A;HMOX1;SFN;FGF13;TRIB3;TAX1BP3;KLF4;INHBB;FOS;CLCA2;OSGIN1;ITGB4;TCN2;NHLH2;ATF3;TAP1;HBEGF;H1-2;PRKAB1;CD82;TNNI1;BAK1;PLK3;IER5;ACVR1B;VWA5A;TM4SF1;TP63;AEN;TSPYL2;VAMP8;CDKN2B;PDGFA;SLC7A11;RALGDS;CCND3;NDRG1;CTSD;SPHK1;PCNA;DRAM1;SLC19A2;FAS;RAP2B;TXNIP;NOTCH1;CASP1;H2AJ;RETSAT;RACK1;STOM;IRAK1;STEAP3;UPP1;CDKN2A;ISC…	ImmuneCells
376	KEGG_2021_Human__Aminoacyl-tRNA biosynthesis	0.275796	1.9004	0.0078329	0.0855846	1	39/44	56.01%	FARSB;GATC;WARS1;VARS1;IARS1;EARS2;FARSA;AARS2;TARS2;YARS1;TARS1;SEPSECS;HARS2;LARS2;LARS1;DARS1;NARS1;YARS2;RARS1;CARS2;IARS2;FARS2;RARS2;NARS2;MARS1;QRSL1;CARS1;MTFMT;AARS1;GATB;EPRS1;TARS3;SARS1;HARS1;KARS1;PSTK;WARS2;GARS1;DARS2	ImmuneCells
377	GO_Biological_Process_2023__Positive Regulation Of Epithelial Cell Proliferation (GO:0050679)	-0.2329	-1.89981	0.00451807	0.0469575	1	56/113	31.55%	CLDN1;CDH13;KDR;SCN5A;WNT7A;EPGN;IGF1;PKHD1;JAML;FGF9;VIP;EGR3;SOX11;TEK;PLXNB3;AREG;EGFL7;BMP2;CCL24;NELL1;YAP1;TNF;ECM1;FGF2;HTR2B;PTPRN;NME1;CCL26;HRAS;BMP4;SEMA5A;CDH3;PGF;NR4A1;BMP5;ANG;EGFR;EGF;MDK;HPN;BAD;FGFR2;MEN1;ZNF703;CNTN1;THBS4;VEGFC;PPP1R16B;NELL2;SFRP1;PTN;PAX2;ERBB2;LAMB1;OSR2;PDCL3	ImmuneCells
378	GO_Biological_Process_2023__Nucleosome Organization (GO:0034728)	0.245159	1.8991	0.00558659	0.0858083	1	59/64	65.00%	H2BC14;H2BC3;H2BC15;H2BC9;PADI4;SOX9;H2AC25;H2BC8;H2BC11;H2BC21;H3C1;ASF1B;CHAF1B;SMARCD3;HMGB2;POLE3;DAXX;BAZ1A;MACROH2A1;DNAJC9;SUPT6H;HIRA;NASP;H3-3A;SMARCB1;BRD2;SART3;SMARCE1;LIN54;SUPT16H;CABIN1;CHD1;CHD2;ATRX;ARID2;RSF1;ARID1A;NAP1L4;SMARCC1;SETD2;RBBP4;MCM3AP;HAT1;NAP1L1;UBN1;SMARCA4;SMARCA5;NPM1;SMARCD1;SMARCD2;SMARCC2;SPTY2D1;ASF1A;HMGA1;KAT6B;SET;NAA60;CHAF1A;SSRP1	ImmuneCells
379	GO_Biological_Process_2023__Positive Regulation Of Cytokine Production Involved In Immune Response (GO:0002720)	0.323458	1.89608	0.00273224	0.0867725	1	16/31	24.57%	NOD2;KIR2DL4;WNT5A;TRIM6;SLC7A5;FZD5;TNFSF4;TNFRSF14;SCIMP;SPHK2;CD55;HLA-A;HLA-F;IRF5;HLA-E;CD226	ImmuneCells
380	GO_Biological_Process_2023__Regulation Of Neuronal Synaptic Plasticity (GO:0048168)	-0.337767	-1.89423	0.00327869	0.0483002	1	18/34	26.54%	SHISA7;GRIN1;GRIN2C;GRIN2B;CAMK2A;GRIN2A;CAMK2B;RAB3A;SYP;NCDN;NETO1;DBN1;DRD2;SHISA9;SLC4A10;PPFIA3;NOL3;NSMF	ImmuneCells
381	GO_Molecular_Function_2023__Polyubiquitin Modification-Dependent Protein Binding (GO:0031593)	0.25875	1.8937	0.0026738	0.0874215	1	48/52	63.98%	DEPDC1B;TNFAIP3;IKBKE;PARP10;MPND;UBQLNL;RNF31;UBXN1;IKBKG;ZFAND2B;TOM1;ATRIP;OTUD7B;ABRAXAS2;RAD18;WDR81;AGAP3;HDAC6;EPS15;PSMD4;VCP;UFD1;ZRANB3;SPRTN;BABAM2;PRPF8;TAB3;RNF169;UIMC1;ZFAND6;RAD23B;MINDY2;UBQLN1;TAB2;ZBTB1;ASCC2;DZIP3;RNF168;SQSTM1;SHARPIN;ZRANB1;OTUD7A;UBQLN2;TNIP2;UBQLN4;RAD23A;UBL7;FAAP20	ImmuneCells
382	GO_Cellular_Component_2023__Sarcoplasmic Reticulum (GO:0016529)	-0.31607	-1.8921	0	0.0487929	1	24/44	29.15%	SLN;TMEM38A;DMPK;CASQ2;CCDC78;CASQ1;DHRS7C;ITPR3;FKBP1B;ANK3;TRDN;JPH1;MRLN;NOS1AP;JSRP1;FSD2;JPH2;CLEC18B;HAX1;RYR2;ATP2A3;THBS4;RTN2;FKBP1A	ImmuneCells
383	WikiPathway_2023_Human__Urea Cycle And Metabolism Of Amino Groups WP497	-0.416842	-1.88951	0.00696864	0.0494604	1	14/20	33.85%	PYCR3;PYCR1;ASS1;OAT;CKB;ODC1;ACY1;GAMT;CPS1;SRM;CKM;SARDH;NAGS;GATM	ImmuneCells
384	GO_Biological_Process_2023__Regulation Of Regulated Secretory Pathway (GO:1903305)	-0.341089	-1.88946	0.00493421	0.0492569	1	16/34	19.19%	SYT5;SYT9;SYT10;SEPTIN5;SYT13;SYT3;SYN1;RAB3A;SYT7;TRPV6;RPH3A;RAB15;SYT2;SYT4;SYT15;SYT1	ImmuneCells
385	GO_Biological_Process_2023__Vesicle-Mediated Transport In Synapse (GO:0099003)	-0.443889	-1.88865	0.00996678	0.0493535	1	9/17	15.72%	CDK5;SYT10;CPLX1;SNAP25;RAB3A;CPLX2;STX1A;VAMP2;BRSK1	ImmuneCells
386	GO_Molecular_Function_2023__Telomeric DNA Binding (GO:0042162)	0.313832	1.88461	0.00771208	0.0918406	1	30/32	59.21%	STON1;PIF1;TINF2;BLM;TELO2;SMG5;TERF2;RPA1;POT1;WRN;UPF2;HMBOX1;SMG1;HNRNPA2B1;HNRNPD;XRCC5;SMG6;UPF1;SMG7;KDM1A;UPF3A;PURA;CTC1;XRCC6;TERF2IP;TERF1;APEX1;RAD50;ZBTB48;ZBTB10	ImmuneCells
387	KEGG_2021_Human__Serotonergic synapse	-0.235396	-1.88269	0.00295858	0.0513112	1	40/102	22.73%	CACNA1S;GNGT1;HTR3B;HTR1A;GNG3;GNG13;TPH2;CYP2D7;KCNJ9;KCNJ6;HTR3E;GNG11;ALOX12B;HTR2A;ITPR3;HTR1F;RAPGEF3;PLCB4;HTR2B;GNG4;HTR3C;HTR2C;KCNJ3;PLCB1;GNB5;GNG8;GNAO1;HRAS;HTR5A;PLA2G4B;GABRB3;PRKCG;ADCY5;GABRB2;MAOB;GABRB1;HTR1E;KCND2;CYP2J2;GNB3	ImmuneCells
388	GO_Molecular_Function_2023__RNA Polymerase II Complex Binding (GO:0000993)	0.322056	1.88202	0.00753769	0.0922098	1	29/31	57.00%	PCIF1;ESRRB;CTR9;WDR43;ERCC5;ELP4;CDC73;RPRD1A;NCOA3;DHX9;WAC;HNRNPU;BRD4;SCAF8;ZNF326;RPRD2;ELP2;PCF11;GTF2B;AGO2;RPRD1B;PEX2;URI1;SMYD2;UVSSA;RTRAF;CCAR2;RECQL5;COX7A2L	ImmuneCells
389	GO_Biological_Process_2023__Positive Regulation Of G Protein-Coupled Receptor Signaling Pathway (GO:0045745)	-0.428955	-1.88183	0.00177936	0.0513648	1	13/18	32.59%	GRP;PDE6H;F2;NECAB2;MRAP2;KLK5;CHGA;KLK6;GSK3A;KLK14;SLC39A14;PHB1;PRMT5	ImmuneCells
390	GO_Biological_Process_2023__Regulation Of Telomere Maintenance (GO:0032204)	0.292836	1.88157	0.0027248	0.0918822	1	35/38	59.09%	MYC;EID3;SIRT6;PIF1;TINF2;GNL3;PML;SMG5;SLF1;NBN;ERCC4;TERF2;POT1;MRE11;SLF2;DHX36;SMC5;SMG1;NSMCE2;ATRX;USP7;HNRNPD;XRCC5;SMG6;YLPM1;UPF1;HDAC8;ERCC1;SMC6;PPP1R10;TERF2IP;NSMCE4A;TERF1;RAD50;NSMCE1	ImmuneCells
391	GO_Biological_Process_2023__Positive Regulation Of Cytokine Production (GO:0001819)	0.160565	1.88127	0	0.0915185	1	104/282	25.63%	IL15;TLR2;SLC11A1;NOD2;FGR;ALOX15B;CHI3L1;RAB7B;OSM;WNT5A;TRIM6;CD80;SLAMF6;IL18R1;POU2AF1;CYP1B1;HYAL2;SLC7A5;PTGS2;FZD5;SERPINE1;HSPA1B;HMOX1;IL7;NR1H4;NODAL;PLA2R1;IL33;IL10;HILPDA;NOX5;PTPN22;HHLA2;MYD88;HIF1A;CCR7;PTGER4;CRTAM;IL1R1;IRF4;FLT4;BATF;HPSE;ISG15;GBP5;S100A13;CD14;CEBPB;CADM1;TNFSF4;POU2F2;CXCL17;AMH;DHX58;IL23A;MAPK13;IKBKE;AGT;SERPINF2;FCER1G;LTB;CD58;TNFRSF14;IRF7;TXK;ZP3;SPHK…	ImmuneCells
392	GO_Biological_Process_2023__Positive Regulation Of Production Of Molecular Mediator Of Immune Response (GO:0002702)	0.30783	1.88054	0.00980392	0.0913729	1	17/33	25.50%	NOD2;WNT5A;TRIM6;SLC7A5;IL10;PTPN22;TNFSF4;MZB1;CLCF1;TNFRSF14;SCIMP;SPHK2;GPI;XBP1;IRF5;HLA-E;CD86	ImmuneCells
393	GO_Biological_Process_2023__Regulation Of Long-Term Synaptic Potentiation (GO:1900271)	-0.359625	-1.88004	0.00686106	0.0518018	1	16/29	29.45%	SCGN;CALB1;SHISA7;CALB2;SHANK3;ADCY1;ADCY8;EPHA4;NSG1;AKAP5;RELN;LILRB2;NOL3;CYP46A1;PTN;CHRNA7	ImmuneCells
394	GO_Biological_Process_2023__Cyclic-Nucleotide-Mediated Signaling (GO:0019935)	-0.339114	-1.87997	0.00634921	0.0515926	1	15/37	13.34%	GUCY1A1;GAL;NPPA;GLP1R;RAPGEF3;ADCYAP1;PDE3A;HTR2B;GUCY1B1;GUCY1A2;ADGRG6;HTR2C;EPHA5;MAPK7;PDE2A	ImmuneCells
395	GO_Biological_Process_2023__Positive Regulation Of Nuclear Division (GO:0051785)	-0.39424	-1.87959	0.00686106	0.0515427	1	13/24	21.63%	CD28;EPGN;IGF1;IGF2;IL1B;NPM2;EDN3;IL1A;BTC;DMRT1;DRD3;LRP5;EGF	ImmuneCells
396	WikiPathway_2023_Human__Synaptic Vesicle Pathway WP2267	-0.303241	-1.87904	0.00160256	0.0515128	1	24/48	27.20%	SLC32A1;UNC13A;CPLX1;UNC13C;STX1B;SYN2;SLC17A6;SYN1;SNAP25;SLC38A1;SLC25A4;RAB3A;CPLX2;SYP;STX1A;VAMP2;SLC17A7;SYT1;STXBP1;AP2S1;SLC17A8;AP2M1;RIMS1;DNM1	ImmuneCells
397	WikiPathway_2023_Human__mBDNF And proBDNF Regulation Of GABA Neurotransmission WP4829	-0.326534	-1.87897	0.00492611	0.0513108	1	16/38	20.17%	BDNF;GABRD;GABRA6;GABRG3;GABRA1;GABRA4;SLC12A5;GABRG2;GABRA5;PIK3R3;GABRA3;GABRB3;GABRB2;GABRA2;GABRG1;GABRB1	ImmuneCells
398	GO_Biological_Process_2023__Cytokine-Mediated Signaling Pathway (GO:0019221)	0.178875	1.87674	0	0.0926301	1	82/199	27.32%	IL15;TNFSF11;JAK3;SOCS1;CXCL1;OSM;OASL;IL4R;CEACAM1;AIM2;IL1RL1;CXCL3;CCL8;IL18R1;IL11RA;IL2RG;IL21R;CXCL2;CCL3;CCL5;BIRC3;IL3RA;IL7;IL7R;IL34;IL33;FLT3;STAT4;MYD88;PLP2;OAS2;IL1R1;RHEX;OSMR;EPO;IL2RA;CCL20;PRLR;MX1;TRADD;CXCL5;IL5;GPR35;CXCR2;CRLF1;FCER1G;CLCF1;IL27RA;UGCG;CD300LF;LILRB1;STAT1;EIF5A;MAPK3;EBI3;STAT5A;PTPN6;IL15RA;ST18;IRAK1;CSF2RB;IL17RA;LRP8;PRKACA;TNFRSF1B;MFAP3;TRAF1;TRAF3IP2…	ImmuneCells
399	KEGG_2021_Human__Synaptic vesicle cycle	-0.265484	-1.8735	0.00753012	0.053102	1	32/71	27.20%	SLC6A12;SLC32A1;SLC1A6;UNC13A;ATP6V1C2;CPLX1;SLC6A11;ATP6V1F;ATP6V1G2;UNC13C;STX1B;SLC17A6;SLC6A9;SLC6A7;SNAP25;RAB3A;CPLX2;ATP6V0D2;STX1A;VAMP2;SLC17A7;SLC6A1;SYT1;STXBP1;AP2S1;SLC17A8;ATP6V1E2;ATP6V0E2;CLTB;AP2M1;RIMS1;DNM1	ImmuneCells
400	GO_Biological_Process_2023__Regulation Of Microtubule Cytoskeleton Organization (GO:0070507)	-0.31964	-1.86978	0.00825083	0.0542978	1	19/39	30.02%	GAS2L2;STMND1;SKA1;CAMSAP3;CDK2AP2;FRMPD2;STMN2;TPPP;PRKAA2;MPDZ;MAPT;EFNA5;STMN4;STMN1;STMN3;EPHA3;SKA3;GAS2L1;MAP6	ImmuneCells
401	GO_Biological_Process_2023__Glutamate Receptor Signaling Pathway (GO:0007215)	-0.334334	-1.86945	0.00863558	0.0542183	1	18/35	22.62%	GRIN1;GRIN2C;GRIN2B;KCNB1;GRIK3;GRIN2A;GRIN3A;PLCB1;GRM3;CDK5R1;GRIA4;GRM2;GRIA3;GRM5;GRIA2;TRPM1;GRM8;GRM1	ImmuneCells
402	GO_Biological_Process_2023__Enzyme-Linked Receptor Protein Signaling Pathway (GO:0007167)	-0.227892	-1.8694	0.00577201	0.0540148	1	48/119	23.96%	ZAP70;SAMD10;LTK;BDNF;KDR;PDGFRA;DOK4;BLK;ROS1;GUCY2D;DOK5;IL31RA;CD7;BDKRB2;NGF;MET;NPPC;NPPA;TEK;LCK;CD8B;ALK;RET;SH2D6;SHC4;CD8A;ALKAL2;EFS;NTRK1;PTPRF;ERBB3;CD3E;TIE1;LIFR;PTPRT;GUCY2C;GUCY2F;FYN;TYRO3;FRK;BCAR1;EGFR;SHC3;NTRK3;SHC2;CNKSR1;CSF1;FGFR2	ImmuneCells
403	GO_Molecular_Function_2023__Neuropeptide Binding (GO:0042923)	-0.407373	-1.86735	0.00171233	0.0545709	1	15/21	32.45%	SSTR3;SSTR1;MCHR1;OPRK1;SSTR2;GPR171;NPY1R;OPRD1;NMUR1;GPR37;NMUR2;NPBWR1;OPRM1;NPBWR2;PTGDR2	ImmuneCells
404	KEGG_2021_Human__NOD-like receptor signaling pathway	0.188198	1.86491	0.00290698	0.0968764	1	81/150	37.41%	NOD2;GBP2;MEFV;CXCL1;AIM2;PSTPIP1;CXCL3;CXCL2;CCL5;BIRC3;CARD18;CASP5;GBP7;NLRP12;OAS3;MYD88;NAMPT;OAS2;CASR;GBP1;TNFAIP3;GBP5;NLRP7;MAPK13;IKBKE;IRF7;NFKBIB;GBP3;MAPK10;RIPK3;STAT1;RNF31;IFNAR2;CTSB;IKBKG;MAPK3;TXNIP;NLRC4;CASP1;CARD16;TRIP6;PLCB3;GBP4;CASP4;STAT2;NLRX1;DHX33;TRPV2;CYBA;IRF9;TYK2;CYBB;ATG16L1;TRPM2;NFKBIA;PLCB2;NFKB1;MFN2;NAIP;BCL2;CARD6;TRAF3;CASP8;TANK;MAVS;ITPR1;PKN1;RIPK2;IF…	ImmuneCells
405	GO_Biological_Process_2023__Neuron Projection Development (GO:0031175)	-0.204073	-1.86443	0	0.0554617	1	68/181	26.13%	BDNF;STMND1;CDK5;WNT7A;ATOH7;USH1C;SHANK1;UNC5A;NGF;SAMD14;NYAP1;NEFH;NPY;LGI1;NEUROD1;STMN2;TUNAR;ATCAY;BLOC1S1;CNTNAP1;L1CAM;ADGRF1;PQBP1;PPP1R9A;PACSIN1;UBB;NEUROD2;OLIG2;RAB6B;ZNF365;GPRIN1;SHANK3;FLRT3;GPRIN2;GDNF;PRDM12;MAPT;NCDN;BICDL1;EPHA4;MAP1B;CDK5R1;PLP1;NEUROD6;NMNAT2;RASGRF1;WHRN;CTTN;GPM6A;OLIG1;PAK3;DCLK1;IL6;STMN4;NYAP2;FRY;NCKAP1;STMN1;STMN3;CNTN4;NOL3;CNTNAP2;EPHB3;CTNND2;TBC1D…	ImmuneCells
406	GO_Molecular_Function_2023__Sterol Transfer Activity (GO:0120015)	0.409221	1.86427	0.00724638	0.0967297	1	10/17	23.39%	APOA1;PLTP;ABCG8;GRAMD1C;CETP;STARD5;GRAMD1A;TSPO;ABCG1;NPC2	ImmuneCells
407	GO_Biological_Process_2023__RNA Metabolic Process (GO:0016070)	0.2008	1.86333	0.00315457	0.0966907	1	90/106	59.35%	RNASEH2A;ISG20;ZC3H12A;RBPMS;EXOSC4;RNASE6;PAPOLG;RBMS1;DKC1;IGHMBP2;EXOSC9;SIDT2;RNGTT;RBFOX2;BICD1;XRN2;PNPT1;RBM3;RBMS2;PRPF4;DDX39B;SYNCRIP;HNRNPL;CELF2;AGO1;PABPC4;AGO4;DIS3L;PCBP3;ALKBH1;HNRNPF;EXOSC2;EXOSC10;RNASET2;HNRNPUL1;RNASEH2B;ATXN2L;EXOSC1;PCBP2;DIS3;DHX8;THOC1;ADAR;FASTKD1;ATXN1;DICER1;EXOSC7;NCBP1;MTREX;DHX36;FTO;DHX9;TENT2;AGO3;RBM6;ATXN2;SETX;HNRNPD;HNRNPU;RBM39;DDX17;RBM5;PAPO…	ImmuneCells
408	WikiPathway_2023_Human__Complement System In Neuronal Development And Plasticity WP5090	0.213017	1.8615	0.00872093	0.0967788	1	44/97	28.14%	CFB;C7;PLSCR1;ATP10A;CR1;PLSCR3;TGFB3;COLEC10;CFP;COLEC12;CRB1;C1R;COLEC11;ITGAV;VTN;BAK1;SUSD4;TGFB2;PARD3;ATP11A;C5AR1;CFD;MFGE8;C1QC;C1QA;SERPING1;C1QB;ITGB3;FAS;PROS1;CD55;C5AR2;GAS6;ATP8B3;C5;C1S;PATJ;BAX;CASP7;ITGB2;MERTK;CASP9;AXL;C2	ImmuneCells
409	KEGG_2021_Human__Inflammatory mediator regulation of TRP channels	-0.245844	-1.85791	0.00650407	0.0575234	1	31/90	17.79%	MAPK11;IGF1;MAP2K6;BDKRB2;NGF;IL1B;ASIC1;CAMK2A;CALML4;HTR2A;KNG1;ITPR3;MAPK12;PLCB4;HTR2B;CAMK2B;HTR2C;NTRK1;ADCY1;ADCY8;PLCB1;TRPV4;CALM1;HRH1;CALM3;PIK3R3;ASIC3;PTGER2;PLA2G4B;PRKCG;ADCY5	ImmuneCells
410	KEGG_2021_Human__Alzheimer disease	-0.177845	-1.85586	0	0.0580593	1	183/344	43.28%	CACNA1S;CDK5;NDUFA7;WNT7A;ATG101;WNT7B;AXIN2;WNT4;TUBB2A;GRIN1;NDUFA4L2;GRIN2C;IL1B;WNT5B;GRIN2B;COX7A1;TUBA4A;CALML4;FADD;KIF5C;WNT10A;KIF5A;NOS2;ITPR3;TUBB3;IL1A;APC2;COX8A;WNT9B;GRIN2A;TUBB4A;NOX4;NDUFA4;PLCB4;TNF;NDUFB5;PSENEN;SLC25A4;IRS1;ATP5MC1;PSMA8;GPR83;NDUFB11;ATP5MC3;ATP5PF;TUBA1A;PLCB1;PSMC3;MAPT;NDUFAB1;CALM1;COX5A;CYCS;WNT9A;FRAT1;CALM3;FZD3;IRS4;PIK3R3;NDUFB10;HRAS;PSMD8;NDUFB2;CO…	ImmuneCells
411	KEGG_2021_Human__Diabetic cardiomyopathy	-0.203953	-1.85568	0.00139276	0.0579044	1	108/183	44.91%	MAPK11;NDUFA7;ACE;COL1A2;NDUFA4L2;PDK2;COL3A1;COX7A1;CAMK2A;TBC1D4;COX8A;MAPK12;NDUFA4;PLCB4;NDUFB5;GFPT2;CAMK2B;SLC25A4;IRS1;ATP5MC1;MMP2;NDUFB11;ATP5MC3;ATP5PF;TNNI3;PLCB1;NDUFAB1;COX5A;PIK3R3;NDUFB10;NDUFB2;COX6A1;SLC2A4;COX5B;NDUFC2;PRKCG;NDUFA13;ATP5F1D;NDUFA2;GAPDH;UQCRB;CYC1;NDUFA1;NDUFB7;UQCR11;UQCRHL;COX7A2;COX6B1;NDUFB8;COX7C;ATP5PO;UQCRFS1;NDUFV2;RYR2;ATP2A3;NDUFA11;SLC25A5;NDUFA6;NDUF…	ImmuneCells
412	GO_Molecular_Function_2023__Transcription Coactivator Binding (GO:0001223)	0.306416	1.85543	0.00490196	0.0990532	1	29/32	57.60%	ESR1;GATA6;EPAS1;THRB;HIF1A;TRERF1;TEAD2;PPARD;STAT1;ZBTB8A;AKR1B1;CIT;RPL17;STAT6;ATF7;FLYWCH1;MED6;MED1;VGLL4;CCNT2;CREBBP;EP300;SMAD4;ZBTB49;SMAD3;MED9;ZBTB17;CDK9;RELA	ImmuneCells
413	GO_Molecular_Function_2023__Cytokine Activity (GO:0005125)	-0.227669	-1.85542	0	0.0577942	1	46/114	20.07%	GDF10;CCL2;WNT7A;CSF3;IL19;WNT7B;WNT4;LEFTY1;GDF9;CCL4;IL1B;WNT5B;BMP3;BMP8A;INHBA;IFNK;WNT10A;BMP2;GDF6;IL1A;CCL24;IL11;WNT9B;CD70;TNF;FGF2;ALKAL2;IFNG;IL17D;GDF7;KITLG;CCL26;WNT9A;CXCL13;CX3CL1;FAM3D;BMP4;CXCL12;ENC1;NDP;INHBC;BMP5;CXCL8;INHA;IL6;SCGB3A1	ImmuneCells
414	GO_Molecular_Function_2023__Cell-Cell Adhesion Mediator Activity (GO:0098632)	-0.313412	-1.85503	0.00493421	0.0577283	1	28/42	39.01%	CDC42EP1;PLXNB3;ROBO4;NTNG1;PDLIM1;EPCAM;TRIM29;KRT18;CD200;STXBP6;CNTN5;NFASC;CNTN4;DSCAM;CNN3;CNTN1;CLSTN3;NRCAM;LRRC4C;JAM3;PPP1CA;CNTN2;BAIAP2L1;PKP3;PAK4;EMB;ROBO3;BAIAP2	ImmuneCells
415	GO_Molecular_Function_2023__Nuclear Localization Sequence Binding (GO:0008139)	0.36938	1.85492	0.00886918	0.0988051	1	18/21	45.26%	IPO4;KPNA7;KPNA2;NFKBIA;NUP58;TNPO2;TNPO1;KPNB1;NUP153;NUP98;NUP214;KPNA3;KPNA1;KPNA4;POM121;KPNA5;KPNA6;POM121C	ImmuneCells
416	GO_Biological_Process_2023__Adenylate Cyclase-Modulating G Protein-Coupled Receptor Signaling Pathway (GO:0007188)	-0.218496	-1.8535	0.00292826	0.0581283	1	57/138	23.05%	MTNR1A;CALCR;CORT;DRD5;ADGRB1;VIPR1;VIP;ADGRD2;MCHR1;OPRK1;CNR1;RAMP2;PTGER1;RAMP3;GIPR;ADGRL4;GLP1R;VIPR2;ADGRB2;GPR4;GABBR1;CHRM2;HTR1F;PTH1R;GPR171;ADM5;NPY1R;ADCYAP1;ADGRF1;GPR26;PTHLH;ADGRG6;ADGRD1;ADCY1;ADCY8;PDE2A;GNAZ;DRD1;GNAO1;GNAL;AKAP12;GABBR2;PTGER2;P2RY12;GPR37;GNA11;ADCY5;ADRA2A;AKAP5;GPR3;ADCYAP1R1;ADORA2B;HTR1E;ADGRF5;GRM8;ADGRF3;ADGRL3	ImmuneCells
417	GO_Cellular_Component_2023__Voltage-Gated Calcium Channel Complex (GO:0005891)	-0.303619	-1.85289	0.00652529	0.0580954	1	24/45	26.98%	CACNA1S;CACNA1G;SCN5A;CACNA2D2;SCN10A;CACNG7;CACNG8;CACNA1H;CACNA1I;SCN2A;SCN3A;PDE4D;CACNG3;TMEM262;CACNB2;SCN8A;SCN4A;SCN1A;CACNA1E;CACNB4;HSPA2;CACNA2D1;CACNA2D3;TMEM249	ImmuneCells
418	GO_Biological_Process_2023__Regulation Of Cardiac Muscle Cell Proliferation (GO:0060043)	0.386496	1.85232	0.00959233	0.0997925	1	10/19	21.81%	PIM1;TP73;GLI1;TGFBR3;TBX2;NOG;TGFBR1;RBPJ;NOTCH1;ZFPM2	ImmuneCells
419	GO_Biological_Process_2023__Regulation Of Fibroblast Proliferation (GO:0048145)	0.273009	1.85187	0.00767263	0.0995939	1	18/44	20.75%	WNT5A;AQP1;CDKN1A;WNT2;MYC;E2F1;EMD;AMH;DAB2IP;CDK4;PDGFA;TRIM32;PARP10;SPHK1;PLA2G2C;FTH1;DDR2;GAS6	ImmuneCells
420	GO_Biological_Process_2023__Regulation Of Macrophage Activation (GO:0043030)	0.323809	1.85118	0.00546448	0.0990951	1	9/29	7.71%	BPI;PLA2G10;THBS1;WNT5A;FCGR2B;IRGM;IL33;ZC3H12A;SPACA3	ImmuneCells
421	GO_Biological_Process_2023__Regulation Of Secretion By Cell (GO:1903530)	-0.278474	-1.85039	0.00611621	0.0588577	1	20/59	15.50%	MCTP2;HTR1A;RAB3B;SEPTIN4;FER1L5;CAMK2A;SEPTIN5;CPLX1;RHBDF1;SYN1;RAB26;RAB3A;SCG5;CPLX2;RAB3C;CPLANE2;SNCAIP;SEPTIN1;LLGL1;VAMP2	ImmuneCells
422	GO_Biological_Process_2023__Regulation Of Cyclin-Dependent Protein Kinase Activity (GO:1904029)	-0.289282	-1.8496	0.00321543	0.0589439	1	21/53	20.24%	TTBK1;CCNO;CDC6;CDKN3;CDK5R2;CCNB2;CCNE1;CDC25C;CDKN1C;CCNA1;CCNE2;CCNF;CDC25A;CDKN2D;CDK5R1;DIRAS3;GADD45A;CCNI2;HSP90AB1;STOX1;CCNB1	ImmuneCells
423	WikiPathway_2023_Human__Estrogen Metabolism WP5276	0.411472	1.84927	0.00678733	0.0996676	1	8/16	16.10%	CYP19A1;CYP2C8;CYP1B1;CYP3A4;HSD17B2;AKR1C3;HSD17B3;HSD17B8	ImmuneCells
424	KEGG_2021_Human__Bile secretion	0.231609	1.84697	0.00900901	0.100476	1	25/65	18.60%	SLC22A1;SLC9A3;AQP9;AQP1;ADCY4;ABCG8;NR1H4;SLC4A5;CYP3A4;ADCY2;SLC4A4;KCNN2;ADCY3;AQP4;SLC5A1;SCTR;ATP1B2;AQP8;SLC2A1;FXYD2;ATP1A2;ABCC2;ADCY6;CFTR;ADCY9	ImmuneCells
425	GO_Molecular_Function_2023__Olfactory Receptor Activity (GO:0004984)	0.247527	1.84534	0.00250627	0.0998768	1	19/57	11.72%	OR10H1;OR7D2;OR1F1;OR56B1;OR52N4;OR7A5;OR56B2P;OR2M3;OR1B1;OR2L13;OR1I1;OR1L8;OR2AT4;OR2B11;OR6A2;OR2A5;OR52P1;OR2L2;OR7C1	ImmuneCells
426	MSigDB_Hallmark_2020__Epithelial Mesenchymal Transition	-0.196567	-1.84274	0	0.060826	1	71/195	20.75%	MGP;BDNF;POSTN;IGFBP2;GAS1;SDC1;NT5E;LAMA1;COL1A2;FAP;MYL9;SLIT2;COL5A3;LGALS1;PDLIM4;THY1;MFAP5;RGS4;FBLN1;ADAM12;BGN;COL3A1;NID2;IGFBP3;CCN1;COL16A1;INHBA;FBLN2;CCN2;VCAM1;AREG;GPC1;COL12A1;SCG2;PCOLCE;ECM1;FGF2;PTHLH;PMEPA1;CAP2;PFN2;MMP2;TNFRSF12A;PRRX1;ENO2;MAGEE1;TFPI2;FMOD;FBN2;FBLN5;IL32;TNC;SFRP4;COL11A1;LUM;CXCL12;DPYSL3;SLIT3;CDH2;COL6A3;CTHRC1;CDH11;CXCL8;GADD45A;SERPINE2;ELN;IL6;GLIP…	ImmuneCells
427	WikiPathway_2023_Human__Kleefstra Syndrome WP5351	0.314535	1.84265	0.00980392	0.100946	1	27/29	57.89%	NR1I3;SMARCD3;ACTL6A;H3-3A;SMARCB1;KDM6A;EHMT1;MBD5;ASXL1;NCOA6;KMT2C;ARID1A;ARID1B;SMARCC1;SMARCA2;ASH2L;SMARCA4;WDR5;PAXIP1;RBBP5;SMARCD1;PAGR1;SMARCD2;RXRA;SMARCC2;H3-3B;DPY30	ImmuneCells
428	GO_Biological_Process_2023__Regulation Of Cellular Response To Growth Factor Stimulus (GO:0090287)	-0.42913	-1.84126	0.00343053	0.0611687	1	11/18	25.18%	FST;SLIT2;DOK5;TMEM204;NELL1;SULF1;ITGA3;SFRP4;FSTL5;FSTL4;PCSK6	ImmuneCells
429	GO_Biological_Process_2023__Hexose Transmembrane Transport (GO:0008645)	0.381819	1.83774	0.00923788	0.10319	1	11/20	18.84%	SLC2A3;SLC2A6;SLC5A9;SLC2A12;SLC2A14;SLC45A3;SLC5A1;SLC5A10;SLC2A1;SLC2A5;SLC2A9	ImmuneCells
430	GO_Biological_Process_2023__Positive Regulation Of Multicellular Organismal Process (GO:0051240)	0.148796	1.83735	0	0.102888	1	79/342	14.51%	ACSL1;IL15;SLC11A1;SMTNL1;FGR;TNFSF11;TP73;LRG1;IL4R;WNT5A;CXCR4;ZBTB16;CD36;ADAM8;ABCA7;ETV4;TNXB;SIX4;SPP1;DCSTAMP;SERPINE1;TGFB3;FOXD1;GRB10;HCRT;UCN;ACADL;PDPN;SOX9;EPAS1;GLIPR2;NODAL;PLA2R1;OXTR;SIX1;SCX;INHBB;IL33;BAMBI;IL10;HILPDA;MC4R;VEGFA;NOX5;HHLA2;MUC1;PTGER4;CRTAM;IRF4;GRPR;BATF;ESRRG;TRPM8;SAP30;PTH2R;NPR1;NOG;PRKAB1;COL1A1;PPARGC1A;PRLR;S100A13;BMPR1B;TGFB2;EBF2;CEBPB;CADM1;AMH;GJA…	ImmuneCells
431	MSigDB_Hallmark_2020__KRAS Signaling Dn	-0.205352	-1.83633	0	0.0629395	1	67/164	24.96%	OXT;MYH7;IGFBP2;CD40LG;TEX15;CACNG1;SLC30A3;ATP4A;TENT5C;SLC38A3;ABCB11;SCN10A;GPRC5C;PDK2;CLDN16;SNCB;SPTBN2;ALOX12B;RIBC2;SYNPO;KLK7;KLHDC8A;HSD11B2;CCNA1;PAX3;ACTC1;ARHGDIG;MAGIX;NRIP2;ARPP21;CHST2;NUDT11;KCNN1;KRT5;TCF7L1;DLK2;IFNG;EPHA5;GDNF;TNNI3;SLC25A23;YBX2;HNF1A;IRS4;SIDT1;SLC16A7;SCGB1A1;CNTFR;YPEL1;LYPD3;GPR3;KCNQ2;EDAR;NR4A2;EGF;CCDC106;CAPN9;GPR19;EFHD1;CELSR2;ZNF112;GAMT;CPB1;RYR2;…	ImmuneCells
432	GO_Biological_Process_2023__Neuron Development (GO:0048666)	-0.212175	-1.8345	0.00149477	0.0632465	1	61/146	29.27%	STMND1;CDK5;UNC5A;INSM1;SAMD14;NPY;LGI1;ASCL1;STMN2;ALK;NOVA2;ATCAY;BLOC1S1;ADCYAP1;L1CAM;ADGRF1;PQBP1;TENM3;PPP1R9A;MYT1L;RAB6B;GPRIN1;EPHA5;SRRM4;PBX1;FLRT3;GPRIN2;GDNF;SLC44A4;PRDM12;MAPT;NCDN;TENM1;BICDL1;MAP1B;CDK5R1;B4GALT6;RASGRF1;GPM6A;GLI2;IL6;ROBO2;RP1;STMN4;FRY;POU3F2;STMN1;STMN3;ETV1;CNTN4;ATP8A2;CNTNAP2;TBC1D24;MAP2;SH3GL2;DMD;TMEM108;NTRK2;MICALL2;TOR1A;BLOC1S4	ImmuneCells
433	WikiPathway_2023_Human__Vitamin A And Carotenoid Metabolism WP716	0.276795	1.83414	0.00568182	0.10389	1	19/40	21.65%	LPL;CD36;RBP2;BCO1;ABCG8;RPE65;LRAT;SULT2B1;RDH12;RBP7;RXRG;ADH4;NPC1L1;RDH10;CYP2E1;ALDH1A2;SULT1A1;RETSAT;RXRB	ImmuneCells
434	KEGG_2021_Human__PPAR signaling pathway	0.238178	1.83402	0.00824176	0.103432	1	21/65	15.12%	ACSL1;APOA1;AQP7;LPL;ANGPTL4;CD36;CPT1B;PLTP;GK;ACADL;PLIN5;ACOX2;RXRG;PLIN2;SLC27A6;CYP27A1;ACSBG2;CPT1A;PPARG;FABP1;PPARD	ImmuneCells
435	KEGG_2021_Human__Renin-angiotensin system	0.402176	1.83337	0.00527704	0.103378	1	9/16	21.63%	ANPEP;ENPEP;ACE2;REN;MME;AGTR1;AGT;NLN;CTSA	ImmuneCells
436	GO_Biological_Process_2023__Response To Lipopolysaccharide (GO:0032496)	0.184853	1.83249	0.00638978	0.102977	1	58/139	28.29%	SLC11A1;NOD2;S100A8;S100A9;GBP2;CXCL1;WNT5A;TRIM6;CD80;CXCL3;NUGGC;CXCL2;IRGM;SERPINE1;ZFP36;IL10;SELP;ZC3H12A;CD68;PTPN22;MYD88;NOS3;NOS1;SBNO2;TNFAIP3;CACTIN;CD14;CXCL5;NLRP7;TNFSF4;CCR5;DAB2IP;GCH1;VIM;NFKBIB;NOCT;GBP3;LILRB1;HMGB2;TRIB1;CASP1;CARD16;LGALS9;IRAK1;SRR;XBP1;FOXP1;EHHADH;TNFRSF1B;PDCD1LG2;LY96;CD86;CASP7;ADAM9;CTR9;IRAK3;AXL;NFKB1	ImmuneCells
437	GO_Biological_Process_2023__Regulation Of Early Endosome To Late Endosome Transport (GO:2000641)	0.39069	1.83229	0.00913242	0.102619	1	18/18	60.97%	MAPK3;VPS11;DAB2;EZR;MSN;DNAJC13;MTMR2;RAB21;NF2;MAP2K1;MAPK1;RDX;DENND10;SNX3;PTPN23;MAP2K2;SNX12;SRC	ImmuneCells
438	GO_Biological_Process_2023__Negative Regulation Of Cell Projection Organization (GO:0031345)	-0.288194	-1.83152	0.00816993	0.0641804	1	31/50	40.56%	MAG;GRIN2B;EFNB2;FKBP4;STMN2;STX1B;GFI1;ZNF365;TNR;CRMP1;TRPV4;RTN4RL2;RTN4R;EPHA4;DPYSL3;DPYSL5;YWHAH;FYN;SPOCK1;PTPRS;ITM2C;MT3;CIB1;PRNP;TSKU;LPAR1;DCC;WNT3A;GORASP1;SPRY2;MYLIP	ImmuneCells
439	WikiPathway_2023_Human__Oncostatin M Signaling Pathway WP2374	0.250998	1.83087	0.00275482	0.102908	1	43/56	48.12%	SOCS3;JAK3;OSM;PXN;FOS;VEGFA;HIF1A;OSMR;CEBPB;CDK2;STAT1;PRKCE;MAPK3;STAT3;SHC1;TYK2;CASP7;PTK2B;PRKCH;NFKBIA;AKT1;NFKB1;CDKN1B;GRB2;MAPK14;STAT5B;PIK3R1;RICTOR;MTOR;RAF1;JAK2;MAP2K1;SOS1;MAPK1;CREB1;PTPN11;MAPK8;MAPK9;KRAS;PRKCD;PRKCB;JAK1;PRKCA	ImmuneCells
440	WikiPathway_2023_Human__Ebola Virus Infection In Host WP4217	0.192029	1.82966	0.00634921	0.103042	1	53/125	28.35%	SOCS3;IQGAP1;HLA-DOB;ITGA4;CD209;HLA-DQB1;PIK3R2;FLNA;ITGA2;ITGAV;TIMD4;HLA-DQA1;SCIN;BST2;DAB2IP;IKBKE;MFGE8;TFAP2A;RELB;IRF7;NFKB2;HLA-C;ITGB3;STAT1;HLA-B;CTSB;MAPK3;HLA-DOA;FLNB;HLA-A;GAS6;VPS11;VPS18;HLA-F;HAVCR1;REL;HLA-DPB1;NPC2;RIGI;TPCN2;HLA-E;HLA-DRB1;ACTN4;HLA-DMA;EIF2AK2;EPS15;CD300A;MERTK;AKT1;AXL;HLA-DMB;NFKB1;RASA2	ImmuneCells
441	GO_Molecular_Function_2023__Sodium Channel Activity (GO:0005272)	-0.322466	-1.82682	0.00950872	0.0660181	1	21/36	28.55%	SCN5A;KCNK1;SCN10A;TRPM5;GRIK3;HCN1;HCN4;SHROOM2;SCNN1B;ASIC3;SCN2A;SCNN1A;SCN3A;HCN2;SCN8A;SCN4A;SCN1A;ASIC2;NALCN;GRIK5;TPCN1	ImmuneCells
442	GO_Biological_Process_2023__tRNA Aminoacylation (GO:0043039)	0.346422	1.82253	0.0097561	0.105387	1	21/22	58.99%	GATC;VARS1;IARS1;HARS2;LARS2;LARS1;NARS1;YARS2;RARS1;IARS2;FARS2;RARS2;MARS1;QRSL1;GATB;EPRS1;HARS1;WARS2;GARS1;DARS2;QARS1	ImmuneCells
443	GO_Biological_Process_2023__Regulation Of Osteoblast Proliferation (GO:0033688)	-0.440398	-1.82123	0.00348432	0.0675038	1	11/16	28.67%	SOX8;BMP2;NELL1;LTF;NPR3;TNN;GREM1;CCNA2;FGFR2;MN1;SFRP1	ImmuneCells
444	GO_Biological_Process_2023__Golgi Vesicle Transport (GO:0048193)	0.171949	1.8209	0	0.105783	1	163/188	64.10%	TBC1D14;RAB7B;GOLT1A;TMED6;PRKD1;TRAPPC3L;KDELR3;SEC16B;RAB13;TMED3;PLPP3;PREB;COPZ2;GOLGA4;TEX261;PDCD6;KDELR1;IER3IP1;NAPA;COPZ1;KDELR2;PGAP1;SLC10A7;COG1;SNX8;COG8;PICK1;COPG1;SEC24D;COG4;CNIH4;RINT1;TMED9;COG7;GOLGA2;RER1;GOLPH3;RP2;SAR1B;ERGIC1;TMED5;ATL3;ZW10;LMAN2L;SEC22B;RAB8A;SAR1A;COG2;SEC16A;MYO5A;DNM2;LMAN1;STX18;VPS51;GOSR2;COG6;SEC24A;HTT;KLHL12;ERGIC2;SPIRE1;RAB12;WHAMM;RAB8B;LMAN2…	ImmuneCells
445	GO_Biological_Process_2023__Positive Regulation Of Telomere Maintenance Via Telomerase (GO:0032212)	0.298726	1.82044	0.00512821	0.105567	1	30/32	61.21%	AURKB;MAPK15;MAPK3;PNKP;HNRNPA1;FBXO4;MAP2K7;ATR;POT1;MAPKAPK5;CTNNB1;TNKS;HMBOX1;TNKS2;XRCC5;MAPK1;MAP3K4;PARN;NEK7;ATM;TNIP1;TCP1;CCT4;CCT2;CCT6A;PRKCQ;CCT7;CCT8;CCT3;CCT5	ImmuneCells
446	GO_Biological_Process_2023__Regulation Of SMAD Protein Signal Transduction (GO:0060390)	0.328414	1.81991	0.00721154	0.105481	1	13/27	23.26%	VEPH1;TGFB3;BMP6;NODAL;RBPMS;FAM89B;CILP;TGFBR1;PPARG;GDF5;BMP7;PBLD;DAB2	ImmuneCells
447	GO_Biological_Process_2023__RNA Processing (GO:0006396)	0.173466	1.81614	0	0.107168	1	172/180	75.99%	RBPMS;EXOSC4;SNRPD3;PPARGC1A;LIN28A;SF3A2;RRAGC;RBMS1;DKC1;USB1;PRKACA;MAGOHB;KHSRP;EXOSC9;RNGTT;BICD1;DDX23;XRN2;SF3A3;SNRPF;RBM3;RBMS2;PRPF4;DDX39B;ALKBH5;PDCD7;SYNCRIP;ZMAT5;HNRNPL;SNRPA1;PPP1R9B;CELF2;PABPC4;DIS3L;U2AF1;HNRNPF;EXOSC2;PRPF3;EXOSC10;PRPF8;HNRNPUL1;ZRSR2;CSTF3;TENT4A;NRDE2;EXOSC1;RNPC3;KIN;SRPK1;ZCCHC8;DIS3;DHX8;THOC1;ADAR;TUT7;TENT4B;SRSF1;FASTKD1;RSRC1;ATXN1;DHX15;TCERG1;EXOSC…	ImmuneCells
448	GO_Biological_Process_2023__Golgi Organization (GO:0007030)	0.194842	1.81561	0	0.107037	1	100/117	59.99%	SPTBN5;TMED6;CDK1;PRKD1;SEC16B;UBXN2B;TMED3;PLK3;ZFP69B;VMP1;CUL7;ATP8B3;LRRK2;BAG5;COG1;COG8;STK25;BLZF1;FAM174B;COG4;PI4K2B;TMED9;COG7;GOLGA2;GOLPH3;TMED5;ATL3;ZW10;SEC22B;RAB8A;CDC42;COG2;FBXW8;SEC16A;NPLOC4;LMAN1;VPS51;COG6;TANGO2;HTT;NSFL1C;UBXN2A;RAB2B;SEC23IP;HACE1;COG3;VRK1;PDCD10;VTI1A;TMED10;GOLGB1;TRIP11;DYM;VPS13B;COG5;TRAPPC12;CSNK1A1;ATL2;RAB2A;CLASP1;CLASP2;TRAPPC8;TRAPPC11;GBF1;AR…	ImmuneCells
449	GO_Biological_Process_2023__Negative Regulation Of T Cell Proliferation (GO:0042130)	0.300802	1.81529	0.00746269	0.106718	1	17/32	25.50%	VSIG4;CD80;CR1;GPNMB;IL4I1;SDC4;IL10;CRTAM;CEBPB;TNFRSF14;LILRB1;SPN;LGALS9;BTN2A2;PDCD1LG2;HLA-DRB1;CD86	ImmuneCells
450	GO_Biological_Process_2023__Vesicle Cargo Loading (GO:0035459)	0.369263	1.81388	0.00765306	0.107192	1	18/20	49.72%	SH2D2A;SEC24D;SEC31B;SAR1A;SEC13;SEC23B;SEC24A;KIF13A;MIA3;TMED10;SEC31A;SEC24B;SEC23A;MIA2;RAB1A;PICALM;TBC1D20;SEC24C	ImmuneCells
451	GO_Biological_Process_2023__DNA Synthesis Involved In DNA Repair (GO:0000731)	0.332881	1.81309	0.00728155	0.10715	1	19/27	36.62%	TNFSF13B;USP43;POLDIP2;PARP10;SYCP1;PCNA;POLD1;PCLAF;VCP;RRM1;SPRTN;POLH;POLD3;POLA1;WRNIP1;PRIMPOL;POLI;USP10;WRN	ImmuneCells
452	GO_Biological_Process_2023__Regulation Of Type II Interferon Production (GO:0032649)	0.225742	1.81216	0	0.107201	1	34/77	25.22%	SLC11A1;SLAMF6;IL18R1;CR1;IRGM;SLC7A5;FZD5;NR1H4;ZC3H12A;PTPN22;CCR7;CRTAM;IL1R1;ISG15;CD14;TNFSF4;IL23A;TXK;ZP3;LILRB1;RIPK3;BTN3A2;TLR8;EBI3;HLA-A;GAS6;BTN3A1;LGALS9;TLR3;PDCD1LG2;VSIR;HLA-DRB1;CD226;TYK2	ImmuneCells
453	GO_Molecular_Function_2023__Tau Protein Binding (GO:0048156)	-0.310831	-1.80787	0.00641026	0.0729936	1	36/39	61.36%	TTBK1;CDK5;BRSK2;MAP1A;BRSK1;HSP90AB1;STUB1;FYN;MARK1;HSP90AA1;GSK3A;PPP2CA;MAP2;PIN1;CLU;BIN1;DCTN1;S100B;BAG2;TAOK2;MARK4;PPP2CB;PPP5C;ROCK2;PICALM;PRKAA1;SNCA;DYRK1A;EP300;MARK3;GSK3B;TAOK1;TTBK2;SMAD2;ROCK1;MARK2	ImmuneCells
454	GO_Cellular_Component_2023__Phagocytic Vesicle Membrane (GO:0030670)	0.270879	1.80423	0.00542005	0.109364	1	33/44	46.01%	SLC11A1;CLEC4E;ATP6V0C;TAP1;HFE;RAC2;VAMP8;HLA-C;HLA-B;ATP6V0A4;TAP2;HLA-A;B2M;TCIRG1;HLA-F;HLA-E;CYBA;CYBB;RAB31;PIP4P2;SEC22B;ATP6V0E1;ATG5;SNAP23;ATP6V0A2;PIKFYVE;PIK3C3;RAB7A;ATG12;APLP2;PIK3R4;TAPBP;ATP6V0A1	ImmuneCells
455	KEGG_2021_Human__Cholinergic synapse	-0.225555	-1.80343	0.00461538	0.0749461	1	41/108	24.85%	CACNA1S;CREB3L1;GNGT1;CHRNA4;CHRNB2;CREB3L4;GNG3;GNG13;KCNJ4;CHRM4;KCNJ6;GNG11;KCNJ12;CAMK2A;ITPR3;CHRM2;CAMK4;PLCB4;CAMK2B;GNG4;KCNJ3;ADCY1;ADCY8;PLCB1;GNB5;GNG8;GNAO1;PIK3R3;HRAS;GNA11;PRKCG;ACHE;ADCY5;KCNQ2;FYN;CHRM3;CHRNA6;GNB3;CHRM1;CREB3;GNG10	ImmuneCells
456	KEGG_2021_Human__Phagosome	0.184421	1.80274	0	0.109288	1	53/140	26.28%	TLR2;RAB7B;THBS1;FCGR3A;FCGR2A;MARCO;CD36;FCGR2B;HLA-DOB;FCAR;CD209;HLA-DQB1;COLEC12;FCGR1A;PLA2R1;MPO;C1R;ITGA2;COLEC11;FCGR2C;TFRC;ATP6V0C;TAP1;TUBB6;ITGAV;NOS1;HLA-DQA1;CD14;TUBB1;TUBA8;MSR1;THBS3;HLA-C;ATP6AP1;RAB5C;ITGB3;HLA-B;ATP6V0A4;TAP2;HLA-DOA;HLA-A;TCIRG1;HLA-F;HLA-DPB1;NCF4;SEC61A1;HLA-E;HLA-DRB1;CYBA;HLA-DMA;CYBB;NCF2;ITGB2	ImmuneCells
457	KEGG_2021_Human__Adipocytokine signaling pathway	0.237755	1.79998	0.00906344	0.109715	1	35/64	33.89%	SOCS3;ACSL1;CD36;CPT1B;RXRG;PRKAB1;PPARGC1A;TRADD;G6PC2;ACSBG2;CPT1A;ACACB;SLC2A1;NFKBIB;NFKBIE;MAPK10;IKBKG;POMC;RXRB;PCK2;TNFRSF1B;STAT3;PRKAG2;IRS2;NFKBIA;AKT1;ACSL5;PPARA;NFKB1;ADIPOR1;PRKAB2;TNFRSF1A;CHUK;AKT2;ACSL4	ImmuneCells
458	KEGG_2021_Human__African trypanosomiasis	-0.327475	-1.79787	0.00822368	0.0769591	1	17/33	23.64%	IL1B;HBA1;NPPA;KNG1;VCAM1;LAMA4;HPR;PLCB4;TNF;IFNG;PLCB1;PRKCG;SELE;HBB;IL6;IDO1;IL12A	ImmuneCells
459	WikiPathway_2023_Human__Androgen Receptor Network In Prostate Cancer WP2263	0.204196	1.79361	0.00628931	0.110629	1	87/101	60.80%	FKBP5;ETV4;CDK1;MYC;PXN;FOS;DOCK1;HSD17B2;E2F1;CHEK1;AR;CDK4;CDK2;HSD17B3;NDRG1;SMARCD3;STAT1;CDC25B;MAPK3;BLM;EIF4EBP1;CCND1;CHEK2;STAT3;RB1;BAX;ACTL6A;PTK2B;AKT1;MAP4K1;CASP9;TSC2;RAPGEF1;BCL2;CASP8;GRB2;MDM2;ATR;MAPK14;SP1;PTEN;MRE11;RPTOR;RICTOR;BARD1;HSD17B4;MTOR;TSC1;RASA1;SMAD2;RAF1;RAP1A;RAP1B;PRKDC;MAP2K1;SOS1;ARID1A;ARID1B;MAPK1;SMARCC1;MSH6;PTPN11;MAPK8;RHEB;ATF1;SMARCA4;ATM;PAK1;CRK;A…	ImmuneCells
460	KEGG_2021_Human__Cholesterol metabolism	0.256691	1.7922	0.00508906	0.11108	1	20/46	24.15%	APOA1;LPA;LPL;ANGPTL4;CD36;PLTP;ANGPTL8;ABCG8;APOH;CETP;LRP2;APOC1;CYP27A1;STAR;TSPO;APOE;ABCA1;NPC2;NCEH1;SOAT1	ImmuneCells
461	KEGG_2021_Human__ECM-receptor interaction	-0.250338	-1.79078	0.00596125	0.0798796	1	34/79	21.49%	SV2C;SDC1;ITGB7;LAMA1;COL1A2;COL6A1;LAMB3;COL4A6;COL9A3;SV2A;LAMC3;LAMA4;COL4A5;CHAD;COL4A3;ITGA1;ITGA8;ITGA11;COL9A1;TNR;LAMB4;ITGA3;COL6A6;TNC;HSPG2;COL6A3;TNN;FRAS1;NPNT;SV2B;COL4A4;RELN;VWF;FREM1	ImmuneCells
462	GO_Cellular_Component_2023__Sarcolemma (GO:0042383)	-0.282434	-1.7904	0.0032	0.0798126	1	28/52	30.04%	SCN5A;FXYD1;CACNG1;CAV1;CCDC78;CAV2;ANK3;FLNC;NOS1AP;SLC8A3;SLC2A4;AHNAK2;SNTA1;SGCZ;POPDC3;RYR2;PDE9A;SYNC;CAV3;PGM5;POPDC2;SGCD;DYSF;DMD;SYNM;ATP1B1;BVES;CIB1	ImmuneCells
463	GO_Biological_Process_2023__Regulation Of Epithelial Cell Proliferation (GO:0050678)	0.213757	1.78228	0.00287356	0.116845	1	31/85	19.14%	NOD2;NUPR1;SIX4;NR4A3;NKX3-1;BMP6;PRKD1;ZFP36;SOX9;TBX1;TGFBR3;NODAL;MYC;RUNX3;VEGFA;SGPP2;TGFB2;C5AR1;DAB2IP;NME2;CDKN2B;FUT1;EPPK1;GDF5;SOX2;DUSP10;LAMC1;TINF2;ZNF304;HYAL1;FGF10	ImmuneCells
464	GO_Biological_Process_2023__Neurotransmitter Transport (GO:0006836)	-0.284473	-1.78007	0.00930233	0.0837454	1	24/48	24.93%	SLC32A1;SLC1A6;UNC13A;SYN2;SLC17A6;SYN1;SNAP25;SLC38A1;PDZD11;SLC29A4;SNPH;LIN7B;NRXN2;BRSK1;SLC17A7;GABRA2;SYT1;STXBP1;SLC17A8;PPFIA3;HRH3;LIN7A;SLC29A2;NRXN1	ImmuneCells
465	GO_Cellular_Component_2023__Tight Junction (GO:0070160)	-0.238267	-1.77951	0.00619195	0.0837966	1	38/84	29.14%	CLDN1;TJP3;CLDN7;JAML;POF1B;MARVELD2;CLDN16;FRMPD2;CLDN11;CLDN34;AMOTL2;MARVELD3;ILDR2;EPCAM;ANK3;CLDN18;SHROOM2;CGN;CLDN23;JAM2;MPDZ;OCEL1;WNK4;AOC1;ILDR1;PARD6G;AMOT;CLDN10;PARD6A;OCLN;MAGI2;CLDN4;CLDN14;PRKCZ;PARD6B;JAM3;BVES;MICALL2	ImmuneCells
466	GO_Molecular_Function_2023__Ubiquitin-Like Protein Peptidase Activity (GO:0019783)	0.295283	1.77837	0.00757576	0.118682	1	28/32	53.69%	USP18;SENP3;USP43;USP44;SENP8;USP50;USP21;YOD1;USP15;STAMBP;USP30;USPL1;USP25;SENP1;SENP5;USP47;USP9X;USP7;USP48;COPS4;ATG4B;OTUD5;UFSP2;COPS5;USP28;ZRANB1;SUMO1;DESI1	ImmuneCells
467	GO_Biological_Process_2023__Cellular Response To Organic Substance (GO:0071310)	0.224227	1.77834	0.00862069	0.118217	1	22/71	14.51%	FOXH1;GPR150;CXCR4;EDN1;NPFFR1;CYP1B1;CCL3;CCL5;IGFBP5;NR1H4;OXTR;NLRP12;FLT3;CCR7;SLC1A1;MME;HCLS1;QRFPR;HCRTR1;ASAH2;GNRHR;AVPR1A	ImmuneCells
468	KEGG_2021_Human__Axon guidance	-0.194242	-1.77737	0	0.0840152	1	70/179	27.71%	SHH;CDK5;EFNB3;MYL9;SLIT2;NFATC4;BOC;WNT4;RGMA;UNC5A;RND1;MET;RHOD;SEMA3G;WNT5B;EFNA2;CAMK2A;EFNB2;PLXNB3;NTNG1;PAK6;SEMA3E;L1CAM;TRPC4;RAC3;TRPC6;CAMK2B;NTN4;EPHA5;GDF7;EPHB4;NTN1;FZD3;TRPC3;PIK3R3;HRAS;EPHA4;RRAS;SEMA5A;CXCL12;SLIT3;DPYSL5;EFNA5;SEMA3C;PAK5;ENAH;PAK3;FYN;SEMA3D;ROBO2;TRPC5;ABLIM1;PARD6G;PARD6A;SEMA3B;FES;RGS3;SMO;EPHB6;EPHA7;ABLIM2;EPHB3;NTNG2;CFL1;EPHA3;MYL5;PRKCZ;EFNA4;LRRC4C…	ImmuneCells
469	GO_Biological_Process_2023__Positive Regulation Of Chemotaxis (GO:0050921)	-0.30309	-1.77578	0.00623053	0.0845782	1	29/41	42.74%	CDH13;KDR;F7;MET;EDN3;RARRES2;NELL1;FGF2;PRSS56;CCL26;SEMA5A;P2RY12;HSPB1;IL6;AIF1;NTRK3;MDK;DSCAM;CNTN1;CCR2;CCL19;PTN;F2RL1;TMSB4X;ZNF580;TREM2;PRKD2;PDGFB;MEGF8	ImmuneCells
470	WikiPathway_2023_Human__Calcium Regulation In Cardiac Cells WP536	-0.205284	-1.77475	0.0057554	0.0848201	1	62/145	29.15%	CACNA1S;GNGT1;GJD2;ATP2B3;GNG3;GJC1;GNG13;CASQ2;CHRM4;RGS4;GNG11;CAMK2A;CASQ1;RGS17;ADRA1A;ITPR3;KCNB1;CHRM2;CAMK4;GJA5;CAMK1;CAMK2B;GNG4;ATP2B2;ANXA6;KCNJ3;ADCY1;ADCY8;GNB5;GNG8;GNAZ;CALM1;GNAO1;CALM3;SLC8A3;GNA11;RGS7;PRKCG;GJC2;ADCY5;RGS14;PRKAR1B;YWHAH;PRKAR2B;CHRM3;RGS9;CACNA1E;GNB3;RGS3;CHRM1;RYR2;ATP2A3;CALM2;RGS6;ADRB1;PRKCZ;ATP1B1;GJB2;RGS5;PKIB;PKIA;FKBP1A	ImmuneCells
471	WikiPathway_2023_Human__Energy Metabolism WP1541	0.260338	1.77305	0.00529101	0.120525	1	40/44	61.16%	PRKAB1;PPARGC1A;PPARG;PPARD;UCP3;PPRC1;MYBBP1A;TFB2M;ESRRA;PRKAG2;PPARA;HDAC1;PPARGC1B;PRKAB2;MAPK14;MED1;PPP3CC;NCOA1;GSK3B;NRF1;EP300;PPP3CB;PPP3CA;ATF2;CREB1;PRKAA1;GABPA;TFB1M;MEF2A;MEF2C;FOXO1;FOXO3;CAMK2G;MEF2D;RXRA;SIRT1;TFAM;UCP2;PRMT1;SIRT3	ImmuneCells
472	KEGG_2021_Human__Long-term potentiation	-0.260633	-1.77273	0.00638978	0.0852752	1	23/63	22.62%	GRIN1;GRIN2C;GRIN2B;CAMK2A;CALML4;ITPR3;CAMK4;RAPGEF3;PPP1R1A;GRIN2A;PLCB4;CAMK2B;ADCY1;ADCY8;PLCB1;CALM1;GRIA1;CALM3;HRAS;PRKCG;GRM5;GRIA2;GRM1	ImmuneCells
473	GO_Biological_Process_2023__Regulation Of T Cell Mediated Cytotoxicity (GO:0001914)	0.304116	1.77187	0.00724638	0.120334	1	15/29	24.55%	CD1D;CEACAM1;KLRC1;KLRD1;MICB;IL23A;HFE;HLA-C;LILRB1;RIPK3;HLA-B;HLA-A;HLA-F;HLA-E;HLA-DRB1	ImmuneCells
474	GO_Biological_Process_2023__Acetylcholine Receptor Signaling Pathway (GO:0095500)	-0.407891	-1.77167	0.00695652	0.085573	1	10/18	23.91%	CHRNB2;CHRM4;LY6H;CHRM2;PLCB1;LYPD1;CDK5R1;GNA11;CHRM3;CHRM1	ImmuneCells
475	KEGG_2021_Human__TNF signaling pathway	0.198307	1.77013	0.00613497	0.120565	1	39/109	23.90%	SOCS3;IL15;NOD2;MAP3K8;BCL3;CXCL1;EDN1;LIF;CXCL3;IL18R1;CXCL2;CCL5;PTGS2;BIRC3;PIK3R2;FOS;TNFAIP3;CREB3L3;CCL20;TRADD;CXCL5;VEGFD;CEBPB;CREB5;MAPK13;DAB2IP;MAPK10;RIPK3;FAS;IKBKG;MAPK3;IRF1;ICAM1;MLKL;ATF4;MAP2K3;MMP14;TNFRSF1B;TRAF1	ImmuneCells
476	KEGG_2021_Human__GnRH secretion	-0.258971	-1.76729	0.00655738	0.0870701	1	23/61	20.42%	CACNA1S;CACNA1G;KCNJ9;KCNJ6;ITPR3;GABBR1;CACNA1H;HCN1;TRPC4;KCNN1;PLCB4;CACNA1I;KCNJ3;PLCB1;KISS1R;PIK3R3;HRAS;GABBR2;HCN2;GNA11;PRKCG;TRPC5;GNRH1	ImmuneCells
477	WikiPathway_2023_Human__Fragile X Syndrome WP4549	-0.216669	-1.7659	0.00436681	0.0872804	1	42/120	24.68%	BDNF;ARC;SHANK1;GRIN1;GABRD;GRIN2B;CNR1;CAMK2A;GABRA1;PTPN5;CAMK4;CYFIP2;CAMK1;GRIN2A;HCN1;GAD1;RAP1GAP;CAMK2B;GABRG2;DLGAP3;PLCB1;GRIA1;EPHA4;MAP1B;GRIP1;GRIP2;AKAP5;GABRB2;SLC6A1;AGAP2;GRM5;FYN;AP2S1;KCNC1;GRIA2;KCND2;GRM1;PPP2R5B;SH3GL3;DEPTOR;MLST8;CLTB	ImmuneCells
478	GO_Biological_Process_2023__Response To Interleukin-1 (GO:0070555)	0.22898	1.76214	0.00278552	0.124151	1	20/66	13.24%	GBP2;CHI3L1;CCL8;CCL3;HYAL2;CCL5;NKX3-1;ADAMTS12;SOX9;ZC3H12A;MYD88;HIF1A;IL1R1;GBP1;CCL20;CACTIN;HDAC4;NLRP7;MAPK13;DAB2IP	ImmuneCells
479	KEGG_2021_Human__Amyotrophic lateral sclerosis	-0.171021	-1.76202	0.00132979	0.0885428	1	171/334	43.42%	DNALI1;MAPK11;NDUFA7;DNAI1;ATG101;TUBB2A;MAP2K6;HAP1;GRIN1;NDUFA4L2;GRIN2C;NEFH;DNAH5;DNAH8;ALYREF;GRIN2B;COX7A1;TUBA4A;GPX3;KIF5C;KIF5A;NOS2;ITPR3;TUBB3;COX8A;MAPK12;GRIN2A;NEFM;TUBB4A;NDUFA4;TNF;NDUFB5;PFN2;ATP5MC1;PSMA8;PFN4;NDUFB11;GPX2;ATP5MC3;ATP5PF;TUBA1A;PSMC3;NDUFAB1;GRIA1;COX5A;CYCS;OPTN;NDUFB10;PSMD8;NDUFB2;COX6A1;NEFL;SOD1;COX5B;NDUFC2;ANG;NDUFA13;ATP5F1D;NRG3;NDUFA2;CHCHD10;GABARAP;U…	ImmuneCells
480	GO_Biological_Process_2023__Response To Molecule Of Bacterial Origin (GO:0002237)	0.232017	1.75911	0.00546448	0.124712	1	26/64	23.95%	SLC11A1;S100A8;S100A9;TRIM6;FCGR2B;CXCL2;FZD5;IL10;SELP;PTPN22;NOS3;NOS1;TNFAIP3;CD14;AHR;CD24;GCH1;NOCT;HMGB2;TRIB1;LGALS9;IRAK1;SRR;FOXP1;EHHADH;IRF5	ImmuneCells
481	MSigDB_Hallmark_2020__Myogenesis	-0.18941	-1.75471	0.004329	0.0907235	1	77/187	27.75%	CTF1;SLN;ACTA1;HSPB2;CDH13;SPEG;MYH7;KCNH2;NAV2;FXYD1;CACNG1;FST;IGF1;PYGM;VIPR1;DMPK;CASQ2;FABP3;ACTN2;ADAM12;BDKRB2;COL3A1;COX7A1;IGFBP3;CASQ1;GPX3;TCAP;TNNI2;ACTC1;CACNA1H;PVALB;GJA5;MAPK12;FKBP1B;ANKRD2;DAPK2;MYOM2;FGF2;CAMK2B;EFS;CRYAB;GNAO1;CKB;OCEL1;SORBS1;TPD52L1;FHL1;ERBB3;TNNT1;COL6A3;MYL6B;LDB3;REEP1;MYOM1;SCD;ACHE;CKMT2;FOXO4;SCHIP1;ABLIM1;PTGIS;CRAT;NCAM1;APOD;MYL4;TNNT2;AEBP1;CNN3;S…	ImmuneCells
482	GO_Biological_Process_2023__Negative Regulation Of Cytokine-Mediated Signaling Pathway (GO:0001960)	0.241443	1.75136	0.0078329	0.128422	1	21/54	22.12%	NLRC5;APOA1;PADI2;DCST1;PELI3;USP18;PTPN2;OAS3;IL1RN;H2BC11;ISG15;CACTIN;PARP14;ARG1;PPARG;ROBO1;TTLL12;RFFL;GAS6;CARD16;STAT2	ImmuneCells
483	GO_Biological_Process_2023__Endoplasmic Reticulum To Golgi Vesicle-Mediated Transport (GO:0006888)	0.193177	1.74937	0.00581395	0.129011	1	101/108	71.16%	GOLT1A;TMED6;TRAPPC3L;KDELR3;SEC16B;TMED3;PREB;TEX261;PDCD6;KDELR1;IER3IP1;KDELR2;PGAP1;COPG1;SEC24D;CNIH4;TMED9;GOLGA2;SAR1B;ERGIC1;TMED5;ATL3;ZW10;LMAN2L;SEC22B;SAR1A;SEC13;SEC16A;LMAN1;GOSR2;SEC24A;KLHL12;ERGIC2;WHAMM;LMAN2;COG3;COPB1;SEC22A;VTI1A;COPA;VAPB;VAPA;MIA3;TMED10;TRAPPC10;SEC31A;USO1;TRIP11;SCFD1;TRAPPC12;TRAPPC9;ATL2;SEC24B;CUL3;RAB2A;TRAPPC8;TRAPPC11;GBF1;MIA2;RAB1A;GOSR1;SPAST;CO…	ImmuneCells
484	WikiPathway_2023_Human__Histone Modifications WP2369	0.24795	1.7422	0.00831025	0.131918	1	45/50	61.62%	H3C10;H4C8;SUV39H1;H4C2;H3C1;H4C16;SMYD5;EZH2;KMT5C;SETD9;KMT2B;SUV39H2;SETD7;DOT1L;EHMT2;H3-3A;KMT2D;SMYD4;SETDB1;SETDB2;AEBP2;EHMT1;PRDM2;KMT2C;SETD5;ASH1L;KMT2E;NSD1;SETD2;SETD3;SMYD3;KMT2A;EED;SETBP1;KMT5A;KMT5B;SETD1B;SMYD2;EZH1;SETD4;H3-3B;SETD6;SET;SETD1A;SETMAR	ImmuneCells
485	KEGG_2021_Human__Tuberculosis	0.17413	1.7415	0.00323625	0.131552	1	121/154	56.55%	TLR2;NOD2;VDR;CLEC4E;FCGR3A;FCGR2A;FCGR2B;HLA-DOB;LSP1;CR1;CD209;HLA-DQB1;TGFB3;FCGR1A;PLA2R1;IL10;FCGR2C;MYD88;ATP6V0C;CR1L;HLA-DQA1;CD14;TRADD;TGFB2;PLK3;CEBPB;IL23A;MAPK13;FCER1G;IL10RA;ATP6AP1;RAB5C;CTSD;IL10RB;SPHK1;MAPK10;STAT1;SPHK2;ATP6V0A4;MAPK3;HLA-DOA;RFX5;IRAK1;TCIRG1;HLA-DPB1;HLA-DRB1;NFYB;HLA-DMA;BAX;RFXANK;CIITA;ITGB2;AKT1;CASP9;HLA-DMB;NFKB1;BCL2;CASP8;CEBPG;RIPK2;CTSS;TNFRSF1A;CL…	ImmuneCells
486	GO_Biological_Process_2023__tRNA Aminoacylation For Protein Translation (GO:0006418)	0.280102	1.74148	0.01	0.131092	1	32/35	58.99%	FARSB;WARS1;VARS1;IARS1;EARS2;FARSA;AARS2;TARS2;YARS1;TARS1;HARS2;LARS2;LARS1;DARS1;NARS1;RARS1;CARS2;IARS2;FARS2;RARS2;NARS2;MARS1;CARS1;EPRS1;TARS3;SARS1;HARS1;KARS1;WARS2;GARS1;DARS2;QARS1	ImmuneCells
487	GO_Biological_Process_2023__Regulation Of miRNA Transcription (GO:1902893)	0.236995	1.74086	0.00526316	0.131027	1	18/56	15.45%	ESR1;MYCN;KLF5;FOSL1;SOX9;MYC;KLF4;IL10;FOS;HIF1A;GATA2;ATOH8;TGFB2;TEAD1;POU5F1;PPARG;PPARD;APLN	ImmuneCells
488	KEGG_2021_Human__Measles	0.186657	1.74008	0.00934579	0.131202	1	66/120	37.28%	TLR2;TP73;JAK3;FCGR2B;HSPA6;IL2RG;CD209;MX2;HSPA1B;PIK3R2;FOS;OAS3;MYD88;OAS2;IL2RA;TNFAIP3;BAK1;MX1;TRADD;CDK4;IKBKE;CDK2;CCND3;IRF7;NFKBIB;BBC3;MAPK10;STAT1;IFNAR2;FAS;IKBKG;STAT5A;RACK1;IRAK1;STAT2;CCND1;IFIH1;STAT3;IRF9;TYK2;BAX;EIF2AK2;NFKBIA;AKT1;CASP9;NFKB1;BCL2;CDK6;TRAF3;RCHY1;CDKN1B;EIF3H;CASP8;MAVS;EIF2AK3;IFNAR1;CHUK;AKT2;MSN;STAT5B;PIK3CD;PIK3R1;EIF2AK4;IRAK4;ADAR;TBK1	ImmuneCells
489	WikiPathway_2023_Human__Measles Virus Infection WP4630	0.188779	1.73764	0.009375	0.131466	1	65/117	37.28%	TLR2;TP73;JAK3;FCGR2B;HSPA6;IL2RG;CD209;HSPA1B;PIK3R2;FOS;OAS3;MYD88;OAS2;IL2RA;TNFAIP3;BAK1;MX1;TRADD;CDK4;IKBKE;CDK2;CCND3;IRF7;NFKB2;NFKBIB;BBC3;MAPK10;STAT1;IFNAR2;FAS;IKBKG;STAT5A;RACK1;IRAK1;STAT2;CCND1;IFIH1;RIGI;STAT3;IRF9;TYK2;BAX;EIF2AK2;NFKBIA;CASP9;NFKB1;BCL2;CDK6;TRAF3;RCHY1;CDKN1B;EIF3H;CASP8;MAVS;EIF2AK3;IFNAR1;CHUK;MSN;STAT5B;PIK3CD;PIK3R1;EIF2AK4;IRAK4;ADAR;TBK1	ImmuneCells
490	WikiPathway_2023_Human__Phosphodiesterases In Neuronal Function WP4222	-0.273267	-1.73692	0.00983607	0.0990688	1	28/53	30.45%	GUCY1A1;PDE6H;GRIN1;GRIN2C;GRIN2B;CAMK2A;PDE8B;PDE6C;GRIN2A;PDE3A;GUCY1B1;GUCY1A2;ADCY1;ADCY8;PDE2A;GRIA1;DRD1;DRD2;PDE4D;ADCY5;PDE1C;PDE10A;PDE9A;PDE6B;PRKG1;PDE1A;CHRNA7;ADORA2A	ImmuneCells
491	KEGG_2021_Human__Cortisol synthesis and secretion	-0.260995	-1.73644	0.00794913	0.0990345	1	21/59	17.79%	CACNA1S;CACNA1G;CREB3L1;KCNK2;CREB3L4;KCNK3;CYP17A1;LDLR;KCNA4;PDE8B;ITPR3;CACNA1H;PLCB4;CACNA1I;ADCY1;PBX1;ADCY8;PLCB1;NR4A1;GNA11;ADCY5	ImmuneCells
492	GO_Biological_Process_2023__Mitochondrial Translation (GO:0032543)	-0.225563	-1.73613	0.0060698	0.0989178	1	74/98	55.95%	NDUFA7;MRPL40;MRPL38;MRPL54;MRPL12;MRPL51;MRPL10;MRPL27;MRPL28;MRPL24;MRPL23;MRPS33;MRPS17;CHCHD1;GADD45GIP1;MRPL55;MRPL17;MRPL36;MRPL9;TUFM;MRPL34;MRPS15;MRPS7;MRPL57;MRPL11;MRPL14;MRPS28;MRPL2;MRPL35;MRPL41;MRPL30;MRPL21;MRPL43;TSFM;MRPL4;MRPS12;MRPS6;MRPS34;MRPS18A;MRPS14;MRPL16;MRPL50;MRPL44;MRPL33;MRPL20;MRPL52;MRPL37;MRPL58;MRPS16;MRPL47;MRPS18C;MRPS23;MRPL42;MRPS10;MRPL48;MRPS30;MRPL18;MRP…	ImmuneCells
493	MSigDB_Hallmark_2020__KRAS Signaling Up	0.160265	1.73163	0	0.132819	1	54/191	17.64%	CFB;F13A1;H2BC3;MAFB;TMEM176B;CXCR4;ANGPTL4;LIF;ADAM8;ETV4;IL2RG;CBX8;GPNMB;RGS16;SPP1;TFPI;PTGS2;BIRC3;MYCN;NR1H4;YRDC;SPON1;SOX9;IL7R;KLF4;ITGA2;IL33;TMEM176A;ANO1;CLEC4A;EMP1;FLT4;HBEGF;HSD11B1;ANXA10;PLEK2;TNFAIP3;CCL20;NRP1;GALNT3;PRKG2;KCNN4;TMEM100;PLAUR;ARG1;VWA5A;MPZL2;FCER1G;TPH1;ID2;ALDH1A2;IL10RA;GADD45G;PRELID3B	ImmuneCells
494	GO_Cellular_Component_2023__Azurophil Granule (GO:0042582)	0.179476	1.73062	0	0.133212	1	67/137	34.37%	BPI;ANXA2;PADI2;RAB44;FPR1;VNN1;MPO;CD68;ATP6V0C;LYZ;BST2;AZU1;GCA;HFE;ARG1;STXBP2;VAMP8;FTL;HRNR;GLA;STX3;RAB5C;AGA;RAB37;UNC13D;ACP3;PRSS57;ARL8A;STOM;CTSA;IMPDH1;NFAM1;TOM1;MAGT1;DNAJC5;PTGES2;NPC2;CTSC;NCSTN;SDCBP;GUSB;ARSA;DSN1;CPPED1;VAMP1;FUCA1;LPCAT1;VCP;ACLY;ARHGAP45;RAB3D;GAA;GNS;CREG1;DDOST;CPNE1;B4GALT1;ARSB;NHLRC3;DNAJC3;HEXB;RNASET2;TADA2A;MANBA;PSEN1;C3AR1;DNAJC13	ImmuneCells
495	GO_Molecular_Function_2023__Monoatomic Cation Channel Activity (GO:0005261)	0.19713	1.73055	0.00591716	0.132792	1	28/97	13.56%	MCOLN2;ANXA2;PKD2L1;AQP1;KCNQ4;PKD1L2;SLC24A5;CALHM5;CALHM6;KCNU1;P2RX1;CALHM2;NOX5;ANO1;PKD1L3;SCNN1G;TRPM8;TRPV3;KCNK10;KCNK9;GRIN3B;KCNN4;KCNK7;TMEM63C;MCOLN3;CALHM4;SLC4A11;KCNK17	ImmuneCells
496	WikiPathway_2023_Human__Nonalcoholic Fatty Liver Disease WP4396	-0.200823	-1.72063	0.00727802	0.106275	1	80/143	43.02%	CCL2;NDUFA7;NDUFA4L2;IL1B;COX7A1;VCAM1;IL1A;COX8A;NDUFA4;TNF;NDUFB5;PRKAA2;IRS1;NDUFB11;NDUFAB1;COX5A;CYCS;PIK3R3;NDUFB10;NDUFB2;COX6A1;COX5B;NDUFC2;CEBPA;CXCL8;NDUFA13;NDUFA2;IL6;UQCRB;CYC1;NDUFA1;NDUFB7;UQCR11;UQCRHL;COX7A2;COX6B1;NDUFB8;COX7C;GSK3A;UQCRFS1;PKLR;NDUFV2;NDUFA11;NDUFA6;NDUFA8;UQCRQ;DDIT3;PRKAG1;COX6C;COX4I1;NDUFA3;UQCRC1;UQCR10;UQCRH;NDUFS3;NDUFB3;NDUFB1;NDUFS5;COX6A2;JUN;NDUFS8;…	ImmuneCells
497	GO_Biological_Process_2023__Transmembrane Receptor Protein Tyrosine Kinase Signaling Pathway (GO:0007169)	-0.173268	-1.71986	0.00137741	0.106406	1	97/266	26.29%	ZAP70;SAMD10;LTK;BDNF;KDR;PDGFRA;DOK4;BLK;IGF1;ROS1;EFNB3;NFATC4;IGF2;FGF17;COL4A6;FGF9;DOK5;IL31RA;CD7;BDKRB2;NGF;PDK2;MET;FOXC1;FGF5;CAV2;EFNA2;TEK;EFNB2;LCK;CD8B;EPHA10;ALK;RARRES2;RET;SH2D6;SHC4;NELL1;CD8A;FGF2;FGF1;ALKAL2;EFS;IRS1;SULF1;NTRK1;EPHA5;MMP2;EPHB4;FLRT3;PLCB1;FLRT2;CHN1;IRS4;SORBS1;PIK3R3;EPHA4;ERBB3;CDK5R1;PGF;EFNA5;CD3E;FOXO4;RGS14;PAK3;TIE1;KALRN;FIBP;PTPRT;FYN;GFRAL;TYRO3;FRK…	ImmuneCells
498	WikiPathway_2023_Human__PPAR Signaling Pathway WP3942	0.235077	1.71703	0.00877193	0.13731	1	18/57	15.12%	ACSL1;APOA1;AQP7;LPL;ANGPTL4;CD36;CPT1B;PLTP;ACADL;ACOX2;RXRG;SLC27A6;CYP27A1;ACSBG2;CPT1A;PPARG;FABP1;PPARD	ImmuneCells
499	KEGG_2021_Human__Rheumatoid arthritis	0.207063	1.71553	0.00874636	0.137568	1	35/82	26.28%	IL15;TLR2;TNFSF11;CXCL1;CD80;CXCL3;HLA-DOB;CXCL2;CCL3;CCL5;HLA-DQB1;TGFB3;TNFSF13B;FOS;VEGFA;ATP6V0C;CCL20;HLA-DQA1;CXCL5;TGFB2;IL23A;TNFSF13;LTB;ATP6AP1;ITGAL;ATP6V0A4;HLA-DOA;ICAM1;TCIRG1;HLA-DPB1;CTSK;HLA-DRB1;HLA-DMA;CD86;ITGB2	ImmuneCells
500	GO_Cellular_Component_2023__Cell-Cell Junction (GO:0005911)	-0.171773	-1.71493	0.00277008	0.109357	1	133/283	36.14%	CLDN1;CDH13;CDC42EP1;JCAD;FOXM1;STEAP1;ADGRB1;CCDC85A;PDLIM4;GJC1;POF1B;MARVELD2;COL13A1;CADM3;GRHL2;LIMS2;CRB2;RND1;PERP;CLDN11;TEK;PTK7;PDLIM1;DSG3;NECTIN1;GJA5;CDH7;ILDR2;CDH1;DLG3;PCDH1;CDCA3;SHROOM4;FAT1;TRPC4;SHROOM2;TRIM29;PDZD11;JAM2;RASIP1;KRT18;CNN2;DSC1;CDH17;TRPV4;CDH4;FLRT2;JAG1;ARVCF;ANXA1;CCDC85B;SHROOM1;CDH22;CDC42EP4;SORBS1;STXBP6;LLGL1;LIN7B;CDH2;CCN3;CDH3;LDB3;CADM4;TMEM47;AHNA…	ImmuneCells
501	GO_Biological_Process_2023__Negative Regulation Of Defense Response (GO:0031348)	0.194263	1.7142	0.00271003	0.137674	1	30/100	17.03%	APOA1;MEFV;AURKB;GPER1;IRGM;FPR2;NR1H4;KLF4;NLRP12;CDH5;TNFAIP8L2;IL10;PTPN2;PTGER4;METRNL;TNFAIP6;TRIM21;TNFAIP3;CACTIN;AHR;CXCL17;DHX58;GBA1;PPARG;ZDHHC18;LYAR;PPARD;IL10RA;SLC39A8;GHRL	ImmuneCells
502	GO_Biological_Process_2023__Protein Localization To Nucleus (GO:0034504)	0.183248	1.71262	0.00909091	0.138432	1	92/119	52.75%	GBP2;BCL3;IPO4;LMNB1;SIX4;KPNA7;SIX1;DVL1;COL1A1;RRS1;HEATR3;NXT1;KPNA2;NOP53;BMP7;ARL2BP;CTDNEP1;TOR1B;CNEP1R1;IPO13;ZBTB7A;FAM53B;STAT3;PML;TOPORS;NUP62;AKT1;E2F3;FAM53C;TSC2;INTS13;TAF8;NUP155;IPO7;TNPO2;NUP85;NOL8;SEC13;STK3;MDM2;NUP93;TNPO1;KPNB1;NUP153;IPO11;XPA;NUP107;TAF3;STK4;WRN;IPO8;NUP98;NUP133;NUP88;TNPO3;APPL1;CSE1L;RAP1GDS1;PIKFYVE;NUP214;KPNA3;KPNA1;HNRNPU;MORC3;KPNA4;POM121;IPO9;…	ImmuneCells
503	GO_Biological_Process_2023__Positive Regulation Of Cell Population Proliferation (GO:0008284)	0.13364	1.71193	0	0.138124	1	128/434	20.76%	IL15;TBC1D8;NOD2;PIM1;BST1;OSM;THBS1;WNT5A;EDN1;GLP2R;LIF;AQP1;ACER3;SAPCD2;IL11RA;CR1;FGFR4;RBPMS2;GPER1;TNXB;NR4A3;CDKN1A;CCL5;FZD9;TGFB3;NANOG;NKX3-1;S1PR3;HMOX1;GLI1;BMP6;WNT2;EMP2;BIRC5;IL7;THPO;FOSL1;SOX9;TBX1;S1PR2;TGFBR3;NODAL;PDGFRB;FGFR3;MYC;PTGFR;FGF22;SCX;IL7R;IL34;BAMBI;FLT3;HILPDA;VEGFA;NAMPT;KIF14;PDGFD;E2F1;OSMR;FLT4;HBEGF;ITGAV;NOP2;INSR;TBX2;HPSE;EPO;HCLS1;PRC1;EPHA1;S100A13;HDA…	ImmuneCells
504	KEGG_2021_Human__Thermogenesis	-0.182836	-1.71109	0.00565771	0.110881	1	118/210	45.13%	CREB3L1;DPF1;MAPK11;NDUFA7;CREB3L4;MGLL;PRDM16;NDUFA4L2;CPT1C;CNR1;COX7A1;NPPA;BMP8A;COX8A;MAPK12;COX16;COX14;NDUFA4;NDUFB5;COA3;ACSL6;PRKAA2;ATP5MC1;ACTL6B;NDUFB11;ATP5MC3;ADCY1;ATP5PF;ADCY8;KLB;NDUFAB1;COX5A;SLC25A29;NDUFB10;HRAS;NDUFB2;COX6A1;COX5B;NDUFC2;ADCY5;NDUFA13;NDUFAF3;ATP5F1D;NDUFA2;COA6;UQCRB;CYC1;NDUFA1;NDUFB7;UQCR11;UQCRHL;COX7A2;ATP5MF;COX6B1;NDUFB8;COX7C;ATP5PO;UQCRFS1;NDUFV2;CRE…	ImmuneCells
505	KEGG_2021_Human__Osteoclast differentiation	0.184542	1.70977	0	0.138037	1	46/121	26.88%	SOCS3;LILRA6;TNFSF11;SOCS1;TNFRSF11B;FCGR3A;LILRB3;FOSL2;LILRB5;FCGR2A;FCGR2B;FOSL1;FCGR1A;PIK3R2;FOS;SIRPB1;FCGR2C;IL1R1;TGFB2;TGFBR1;MAPK13;PPARG;MITF;RELB;LCP2;NFKB2;OSCAR;ITGB3;LILRB1;MAPK10;STAT1;IFNAR2;IKBKG;MAPK3;STAT2;CTSK;NCF4;CYBA;IRF9;TYK2;LILRA1;NCF2;NFKBIA;TEC;AKT1;NFATC1	ImmuneCells
506	KEGG_2021_Human__Calcium signaling pathway	-0.178617	-1.69648	0.00564175	0.116779	1	100/223	32.19%	CACNA1S;CACNA1G;CCKBR;KDR;PDGFRA;F2R;DRD5;PLCD3;ITPKA;ATP2B3;FGF17;CASQ2;FGF9;CYSLTR1;GRIN1;GRIN2C;BDKRB2;NGF;MET;TACR2;FGF5;PTGER1;CAMK2A;CASQ1;CALML4;HTR2A;NOS2;ADRA1A;ITPR3;CHRM2;CACNA1H;CAMK4;RET;CAMK1;TRDN;GRIN2A;PLCB4;FGF2;HTR2B;CAMK2B;FGF1;SLC25A4;CACNA1I;P2RX5;ATP2B2;HTR2C;NTRK1;ADCY1;ADCY8;GDNF;PLCB1;CALM1;HRH1;CAMK1G;DRD1;CALM3;GNAL;ERBB3;SLC8A3;HTR5A;GNA11;PRKCG;PDE1C;GRM5;EDNRA;CHRM3;…	ImmuneCells
507	GO_Biological_Process_2023__Double-Strand Break Repair (GO:0006302)	0.164164	1.68096	0.00323625	0.153324	1	138/166	61.70%	SLX1A;PARP9;ANKLE1;DEPDC1B;PARP3;XRCC3;STON1;EID3;EYA1;CDCA5;RECQL4;TNKS1BP1;POLQ;NHEJ1;TONSL;DTX3L;SIRT6;XRCC2;RAD54B;KDM4D;AP5Z1;MPND;REC8;HMGB2;GEN1;BLM;MTA1;ZFYVE26;PSMD14;RBBP8;CHEK2;POLM;PPP4C;TOP3A;PNKP;TDP1;EXD2;RAD51D;VCP;CHD4;HUS1;MUS81;BRCA2;PALB2;CYREN;ERCC5;RPA2;SLF1;PIAS4;XRCC4;NBN;ERCC4;MMS22L;SMARCAL1;WDR48;BABAM2;POLA1;TDP2;NABP1;RPA1;TENT4A;SPIDR;DCLRE1C;REV3L;SAMHD1;MRE11;HELQ;…	ImmuneCells
508	GO_Biological_Process_2023__Cellular Response To Lipid (GO:0071396)	0.15903	1.67914	0.00996678	0.154463	1	60/201	19.42%	NOD2;GBP2;CXCL1;WNT5A;PDK4;ESR1;MGARP;WNT10B;CD80;CXCL3;FZD7;AQP1;NUGGC;GPER1;CXCL2;RORC;IRGM;WNT8B;SPP1;TFPI;SERPINE1;HSPA1B;NKX3-1;WNT2;ZFP36;NR1H4;SOX9;TBX1;IL10;ZC3H12A;CD68;ADCY2;MYD88;WNT3;SBNO2;TNFAIP3;ADCY3;CACTIN;CD14;CXCL5;NLRP7;TNFSF4;AHR;CCR5;DAB2IP;AKR1C3;PTK6;FZD4;GPBAR1;SLC5A5;VIM;ATP1A2;NFKBIB;ADCY6;GBP3;LILRB1;CFTR;HMGB2;SPHK2;FZD10	ImmuneCells
509	GO_Biological_Process_2023__Chromatin Remodeling (GO:0006338)	0.150242	1.67486	0	0.157013	1	177/220	58.65%	TFAP2C;ESR1;PADI2;PADI4;SOX9;DEPDC1B;MYC;DPF3;PER1;CHEK1;HDAC4;H3C1;BRDT;INO80C;TADA2B;DTX3L;KDM4D;SMARCD3;MYBBP1A;POLE3;MTA2;SUV39H2;MTA1;SETD7;LOXL2;DAXX;BAZ1A;ZBTB7A;DDX21;RB1;TAF6L;MACROH2A1;ACTL6A;HDAC6;SUPT6H;RING1;USP15;CHD4;DDX23;MBD3;HIRA;KDM4B;HDAC1;ERCC6;BRD9;GATAD2A;MTHFR;MORC2;SMARCB1;YEATS4;SATB2;NFRKB;NUDT5;HCFC2;PCGF6;SART3;SMARCE1;LIN54;TDG;DR1;SETDB1;TADA2A;DPF2;PRIMPOL;GLMN;YEA…	ImmuneCells
510	GO_Molecular_Function_2023__Metal Ion Binding (GO:0046872)	-0.150235	-1.66772	0.00263158	0.132725	1	194/460	33.99%	MCTP2;ANXA9;CDH13;PDXP;TCHH;SHH;POSTN;PLA2G5;SCGN;SYT5;AIF1L;CALB1;CD320;NAALADL1;MYL9;SLIT2;NUDT8;MBLAC1;ATP4A;PLSCR4;VIL1;CASQ2;SEPTIN4;THTPA;GRIN1;PRF1;FBLN1;NUDT18;CABCOCO1;DYRK3;SLC39A4;PRSS3;CLXN;SYT9;ESYT3;DNER;FER1L5;SNCB;CPNE6;SYT10;PCP4;IGFBP3;CASQ1;CALML4;TPPP;DSG3;SYT13;RET;BAIAP3;NT5C1A;SYT3;CDH7;CDH1;MAPK12;CALB2;TUBB4A;BRSK2;KCNIP3;PLK1;ITIH1;RASGRP1;BCL2L10;SYT7;DCTPP1;ANXA6;NME1;…	ImmuneCells
511	GO_Molecular_Function_2023__Ribosome Binding (GO:0043022)	0.198512	1.66618	0.00588235	0.159194	1	75/83	67.16%	PIM1;CPEB4;ZC3H12A;CPEB1;LIN28A;EFNA1;IFRD2;ZNF598;NCLN;SLFN12;RPSA;RACK1;NMD3;IGHMBP2;DHX33;SEC61A1;MRPS27;GCN1;SRP68;RBM3;OXA1L;MRRF;ERI1;SHFL;YTHDF1;MAP3K20;NOMO3;DNAJC2;MTIF2;ETF1;PYM1;G3BP1;LARP1;CPEB2;NAA15;NAA16;DHX9;NEMF;CPEB3;CPSF6;DHX29;MTIF3;USP16;DDX3X;PTCD3;FMR1;LTN1;YTHDF3;NOMO1;CCDC47;SRP72;NPM1;SERBP1;MAIP1;TMCO1;MALSU1;SEC61A2;SRP19;EIF2S1;GUF1;GEMIN5;MTRES1;TTC5;SEC61B;EIF3C;NOM…	ImmuneCells
512	KEGG_2021_Human__Estrogen signaling pathway	-0.207375	-1.66481	0.00900901	0.13323	1	42/112	25.11%	CREB3L1;HSPA1L;CREB3L4;KRT19;KCNJ9;KCNJ6;HSPA8;HSPA1A;CALML4;FKBP4;KRT31;ITPR3;GABBR1;SHC4;PLCB4;KRT17;KRT18;MMP2;KCNJ3;ADCY1;ADCY8;PLCB1;CALM1;GNAO1;CALM3;PIK3R3;HRAS;GABBR2;ADCY5;KRT10;PGR;HSP90AB1;RARA;HSP90AA1;EGFR;SHC3;SHC2;GRM1;HSPA2;CREB3;CALM2;OPRM1	ImmuneCells
513	GO_Biological_Process_2023__Ubiquitin-Dependent Protein Catabolic Process (GO:0006511)	0.133605	1.65537	0	0.160263	1	296/353	64.47%	RNF144B;DCST1;IFI27;TRIM25;TNFSF13B;CHMP4A;FBXL22;RNF133;FBXL7;KIF14;UBXN2B;TRIM72;RNF149;TNFAIP3;UBXN11;UBE2L5;TRIM71;RNF144A;HERC3;SPSB2;CHMP4C;PEX12;USP44;TRIM32;DTX3L;CHMP1A;SPSB1;TRIM9;ARRDC1;BMAL1;CUL1;UBQLNL;PSMD9;KLHL25;UBXN1;HERC6;ZNRF3;RFFL;FBXW5;MTA1;HERC5;ZFAND2B;MVB12A;PSMD14;SIAH2;SYVN1;XBP1;PEX10;RHOBTB3;OTUD7B;PSMA6;WDR81;KCTD6;PML;UBE2L6;AGAP3;TOPORS;PSMD4;VCP;UFD1;PSMA1;RNF215;R…	ImmuneCells
514	GO_Molecular_Function_2023__Cytokine Receptor Binding (GO:0005126)	0.203728	1.64508	0.00833333	0.164647	1	21/70	15.32%	TNFSF11;JAK3;OSM;LIF;CCRL2;CCL5;TGFBR3;IL34;IL10;VEGFA;IL1RN;RHEX;OSMR;EPO;TGFB2;VEGFD;TNFSF4;AMH;IL23A;CRLF1;CLCF1	ImmuneCells
515	GO_Biological_Process_2023__mRNA Splicing, Via Spliceosome (GO:0000398)	-0.174485	-1.63866	0.00578035	0.150246	1	196/205	76.77%	HSPA8;NOVA2;PQBP1;GPKOW;WDR83;PUF60;SNRPN;CELF4;TSSC4;SLU7;SRSF12;SRPK3;XAB2;RNF113A;SNRPD2;HTATSF1;U2AF1L4;SMN1;GEMIN4;SF3B5;USP49;RBM42;NOVA1;PPIL1;DDX41;LSM4;PIN1;SNRPD1;PRPF31;SF3B4;EIF4A3;ZMAT2;RBM8A;PRMT5;LSM3;SNRNP27;SNRPB;SNRPE;BUD31;BCAS2;SF3B6;LSM2;SNU13;TFIP11;IK;LSM5;MFAP1;CRNKL1;SYF2;GEMIN2;SRSF8;DDX20;RBM4B;COIL;DBR1;LSM7;U2AF2;RBM19;FRG1;SNRPG;LSM6;SF3B2;CWC15;TXNL4A;PLRG1;SF3A1;SC…	ImmuneCells
516	MSigDB_Hallmark_2020__Allograft Rejection	0.154973	1.6246	0.00701754	0.173579	1	74/186	28.27%	IL15;TLR2;FGR;GBP2;SOCS1;BCL3;CD1D;IL4R;CD80;GZMA;FCGR2B;LIF;HLA-DOB;IL2RG;CCL5;GPR65;CFP;KLRD1;IL7;NCR1;FLNA;INHBB;IL10;STAT4;HIF1A;CRTAM;TAP1;IRF4;HCLS1;IL2RA;HLA-DQA1;TGFB2;CD96;CCR5;CD247;LTB;SRGN;CCND3;IL27RA;LCP2;IRF7;STAB1;TIMP1;STAT1;EIF5A;ITGAL;IFNAR2;FAS;TAP2;WARS1;GCNT1;HLA-DOA;ICAM1;HLA-A;PTPN6;B2M;ICOSLG;RPS9;CDKN2A;RPS19;NCF4;TLR3;LY75;HLA-E;IRF8;HLA-DMA;CD86;BCAT1;ITGB2;AKT1;MAP4K1…	ImmuneCells
517	KEGG_2021_Human__Influenza A	0.164059	1.61921	0.00914634	0.174202	1	76/145	37.28%	SOCS3;HLA-DOB;CCL5;NXF3;MX2;HLA-DQB1;TMPRSS2;TRIM25;KPNA7;PIK3R2;IL33;OAS3;MYD88;OAS2;HLA-DQA1;BAK1;MX1;TRADD;NXT1;CDK4;IKBKE;RSAD2;CCND3;IRF7;TNFRSF10A;NFKBIB;KPNA2;STAT1;IFNAR2;FAS;IKBKG;MAPK3;HLA-DOA;ICAM1;CASP1;STAT2;NLRX1;HLA-DPB1;TLR3;IFIH1;HLA-DRB1;PML;IRF9;HLA-DMA;TYK2;BAX;EIF2AK2;CIITA;NFKBIA;AKT1;CASP9;TNFSF10;CALCOCO2;HLA-DMB;NFKB1;CDK6;TRAF3;BCL2L2-PABPN1;CASP8;DNAJC3;CPSF4;MAVS;TNFRS…	ImmuneCells
518	WikiPathway_2023_Human__Spinal Cord Injury WP2431	0.179951	1.61864	0.00299401	0.17434	1	31/109	14.05%	CXCL1;LILRB3;FCGR2A;AQP1;CXCL2;LTB4R;PTGS2;CDK1;TNFSF13B;GFAP;ZFP36;SOX9;MYC;COL4A1;FOS;SELP;LGALS3;VCAN;IL1R1;E2F1;NOS1;AQP4;XYLT1;E2F5;GJA1;CSPG4;CHST11;TNFSF13;CDK4;ARG1;CDK2	ImmuneCells
519	WikiPathway_2023_Human__Hepatitis B Infection WP4666	0.170697	1.60931	0.00628931	0.178846	1	105/135	53.64%	TLR2;JAK3;CDKN1A;TGFB3;BIRC5;PIK3R2;MYC;FOS;STAT4;MYD88;CREB3L3;TGFB2;CREB5;TGFBR1;MAPK13;IKBKE;IRF7;ATP6AP1;MAPK10;PCNA;STAT1;FAS;IKBKG;MAPK3;STAT5A;ATF4;IRAK1;STAT2;MAP2K3;TLR3;IFIH1;RIGI;ARAF;STAT3;TYK2;BAX;DDB2;STAT6;PTK2B;AKT1;NFATC1;CASP9;NFKB1;BCL2;TRAF3;MAP2K7;CASP8;NFATC2;GRB2;MAVS;ATF6B;IFNAR1;CHUK;AKT2;MAPK14;STAT5B;PIK3CD;PIK3R1;IRAK4;CREB3L2;TGFBR2;TBK1;SOS2;MAP3K1;SMAD2;RAF1;JAK2;MA…	ImmuneCells
520	MSigDB_Hallmark_2020__Estrogen Response Late	0.157532	1.59616	0.00699301	0.184252	1	66/185	22.61%	ST14;FKBP5;S100A9;IGFBP4;TFAP2C;CA12;CD44;SERPINA1;GPER1;PTGER3;SLC7A5;CISH;RNASEH2A;ISG20;EMP2;ZFP36;SFN;PTGES;FGFR3;ST6GALNAC2;ACOX2;SULT2B1;KLF4;PDLIM3;FOS;IL17RB;NBL1;ALDH3B1;XRCC3;BATF;CCN5;CYP4F11;RAPGEFL1;HSPB8;PRLR;RPS6KA2;MICB;PPIF;MAPK13;NXT1;LAMC2;PLAC1;PDZK1;PLXNB1;IGSF1;PAPSS2;STIL;ID2;GALE;LSR;GLA;PLK4;NAB2;SCUBE2;ABHD2;SORD;FLNB;PTPN6;ATP2B4;FARP1;BLVRB;SIAH2;DHCR7;CCND1;RBBP8;XBP1	ImmuneCells
521	GO_Biological_Process_2023__Positive Regulation Of Intracellular Signal Transduction (GO:1902533)	0.121004	1.57945	0	0.194133	1	139/498	21.68%	TLR2;NOD2;S100A8;FGR;TNFSF11;S100A9;IQGAP1;CHI3L1;OSM;EPHA8;THBS1;NUPR1;WNT5A;GRM4;MC1R;P2RX3;TRIM6;ADRA2C;LIF;ADAM8;GPER1;TSPAN6;TNFSF14;UNC5CL;S100A4;TGM2;CCL3;CCL5;BIRC3;ART4;TGFB3;NKX3-1;DOK2;HMOX1;BMP6;GDF15;SLC35B2;ALPK1;TRIM25;HTR6;ADRA1B;PRKD1;F10;SECTM1;THPO;SOX9;TBX1;NODAL;PDGFRB;FGFR3;FLNA;NLRP12;FLT3;ROR1;VEGFA;GPR62;SELP;HCST;MYD88;IFI35;CCR7;ROR2;TFRC;ADGRV1;RBPMS;PDGFD;AVPI1;PTP4A3…	ImmuneCells
522	KEGG_2021_Human__Human T-cell leukemia virus 1 infection	0.145153	1.57472	0.00687285	0.195472	1	79/211	28.29%	IL15;IL1R2;JAK3;HLA-DOB;ADCY4;IL2RG;CDKN2C;CDKN1A;CRTC3;HLA-DQB1;TGFB3;BUB1B;ZFP36;FOSL1;PIK3R2;MYC;MAD1L1;E2F2;FOS;ADCY2;IL1R1;E2F1;CHEK1;TBPL2;IL2RA;CREB3L3;ADCY3;HLA-DQA1;NRP1;TGFB2;CREB5;TGFBR1;CDK4;CDK2;CDKN2B;SLC2A1;RELB;CCND3;NFKB2;HLA-C;ADCY6;MAPK10;ADCY9;TSPO;HLA-B;ITGAL;ETS2;IKBKG;MAPK3;HLA-DOA;ICAM1;STAT5A;HLA-A;IL15RA;B2M;ATF4;CCND1;HLA-F;LTBR;HLA-DPB1;PRKACA;CDKN2A;CHEK2;HLA-E;HLA-DR…	ImmuneCells
523	GO_Cellular_Component_2023__Secretory Granule Lumen (GO:0034774)	0.136825	1.56188	0.00373134	0.202535	1	107/280	29.14%	S100A8;FGR;BPI;F13A1;S100A9;EPX;LRG1;CHI3L1;APOA1;HK3;CXCL1;ANXA2;THBS1;SGCG;CHIT1;PADI2;PYGL;CRISPLD2;HSPA6;F5;SERPINA1;SERPINE1;TGFB3;TIMP3;APOH;CFP;MPO;VEGFA;LGALS3BP;FOLR3;HPSE;TGFB2;VEGFD;LYZ;AMH;AZU1;F3;GCA;CFD;NME2;ARG1;SERPINF2;ITIH4;FTL;PDGFA;CRACR2A;S100A11;FERMT3;SRGN;HRNR;GLA;OSCAR;ITIH3;SERPING1;GHRL;DNASE1L1;CTSD;TIMP1;AGA;GHDC;MVP;PROS1;POMC;PNP;UNC13D;GPI;GAS6;PTPN6;PRSS57;B2M;CTS…	ImmuneCells
524	GO_Biological_Process_2023__Transcription By RNA Polymerase II (GO:0006366)	0.148273	1.54721	0.00638978	0.208236	1	150/181	62.24%	ANXA2;ETV7;GTF2H4;CEBPD;THRB;E2F2;PPARGC1A;C5AR1;GCM1;PPARG;ELL2;PAX5;MED26;HSF2BP;TAF13;NOCT;MED18;MAZ;PIR;ATF4;ZBTB7B;RXRB;NFE2L3;XBP1;MED16;POLR2H;DDX21;IRF9;TAF5;GMEB2;SUPT6H;XRN2;E2F3;CTR9;TAF12;NFKB1;PAAF1;TAF8;SNAPC4;ERCC6;TAF5L;ARRB2;ZC3H8;ERCC3;EAF2;ELOA;TBP;TFDP1;ELL;KLF13;TAF11;CDK7;CCNK;SUPT16H;MED27;PKNOX1;DEAF1;MED1;MNAT1;PCID2;TAF2;TAF3;ELP4;NFIC;GTF2H1;CDC73;CCNH;NCBP1;CDK12;RPRD1…	ImmuneCells
