# Supplementary material for: Single-Cell Multi-Modal Differential Analysis of the Human Neo-Cortex in HIV Infection Reveals Similarities with Hallmarks of Alzheimer’s Disease
Source: Research Square preprint supplement (doi:10.21203/rs.3.rs-7636879/v1), 2025-11-01
Supplement: Supplementary file 2 [file 21869b3be4060c2a73375bfe.xlsx]

## Sheet: Sheet1
	Term	ES	NES	NOM p-val	FDR q-val	FWER p-val	Tag %	Gene %	Lead_genes	cell_type
0	WikiPathway_2023_Human__Cytoplasmic Ribosomal Proteins WP477	-0.666487	-4.88766	0	0	0	74/87	23.40%	RPS27A;RPS7;RPS4X;RPL7A;FAU;RPL41;RPS5;RPL18A;RPL10;RPL8;RPL26;RPS9;RPS12;RPL35A;RPL6;RPS3A;RPL19;RPS15;RPS13;RPL12;RPS8;RPL23;RPL10A;RPL13;RPS10;RPS16;RPLP0;RPS14;RPLP1;RPL11;RPL9;RPL17;RPL21;RPLP2;RPS11;RPS2;RPS21;RPL15;RPS26;RPL32;RPL3;RPL7;RPL13A;RPS18;RPL24;RPS25;RPL27;RPL34;RPL23A;RPL38;UBA52;RPL35;RPS17;RPS28;RPL29;RPL4;RPL5;RPS15A;RPS6;RPS23;RPL28;RPL14;RPS27;RPS6KA1;RPS4Y1;RPS24;RPS20;RP…	LAMP5RELN
1	GO_Biological_Process_2023__Cytoplasmic Translation (GO:0002181)	-0.649078	-4.84615	0	0	0	77/92	23.40%	RPS27A;RPS7;RPL36AL;RPS4X;RPL7A;FAU;RPL41;RPL26L1;RPS5;RPL18A;RPL10;RPL8;RPL26;MRPS12;RPS9;RPL35A;RPL6;RPS3A;RPL19;RPS15;RPS13;RPL12;RPS8;RPL10A;RPL13;RPL22L1;RPS10;RPS16;RPLP0;RPS14;RPLP1;RPL11;RPL9;RPL17;RPL21;RPLP2;RPS11;RPS2;RPS21;RPL15;RPS26;RPL32;RPL3;EIF4A2;RPL7;EIF4A1;RPL13A;RPS18;RPL24;RPS25;RPL27;RPL34;RPL23A;RPL38;UBA52;RPL35;RPS17;EIF3I;RPS28;RPL29;RPL4;RPL5;RPS15A;RPS6;RACK1;RPS23;RP…	LAMP5RELN
2	KEGG_2021_Human__Ribosome	-0.59486	-4.83326	0	0	0	104/129	26.27%	RPS27A;MRPL36;MRPL12;RPS7;RPL36AL;RPS4X;RPL7A;FAU;MRPL28;RPL41;RPL26L1;RPS5;MRPL34;RPL18A;RPL10;RPL8;RPL26;MRPS12;RPS9;MRPL2;RPS12;MRPL14;RPL35A;RPL6;RPS3A;RPL19;MRPS15;RPS15;RPS13;RPL12;RPS8;RPL23;RPL10A;RPL13;RPL22L1;RPS10;RPS16;RPLP0;MRPL24;RPS14;RPLP1;RPL11;RPL9;RPL17;MRPL16;RPL21;RPLP2;RPS11;RPS2;RPS21;RPL15;RPS26;RPL32;RPL3;RPL7;MRPL17;RPL13A;MRPL11;RPS18;RPL24;RPS25;MRPL27;RPL27;MRPS2;RPL3…	LAMP5RELN
3	GO_Biological_Process_2023__Peptide Biosynthetic Process (GO:0043043)	-0.544137	-4.57427	0	0	0	105/146	24.60%	RPS27A;MRPL36;MRPL12;MRPL51;RPS7;GGT5;RPL36AL;RPS4X;PCSK1;RPL7A;FAU;MRPL28;RPL41;RPS5;MRPL55;MRPL34;RPL18A;RPL10;RPL8;RPL26;MRPS12;RPS9;MRPL14;RPL35A;RPL6;RPS3A;RPL19;MRPS15;RPS15;RPS13;RPL12;CARNS1;RPS8;RPL10A;RPL13;RPS10;DHPS;RPS16;MRPL52;RPLP0;GGTA1;MRPL24;RPS14;RPLP1;RPL11;RPL9;RPL17;RPL21;RPLP2;RPS11;RPS2;RPS21;RPL15;RPS26;RPL32;RPL3;EEF1A2;ZAR1;RPL7;COPS5;RPL13A;MRPL11;RPS18;MRPL43;RPL24;RP…	LAMP5RELN
4	WikiPathway_2023_Human__Electron Transport Chain OXPHOS System In Mitochondria WP111	-0.608617	-4.49313	0	0	0	63/88	19.18%	COX6A1;NDUFB8;NDUFA13;ATP5MF;ATP5MC3;COX4I1;COX8A;UQCRFS1;COX7A1;UQCRQ;NDUFB3;NDUFA11;NDUFA7;COX6B1;NDUFB10;NDUFC2;SLC25A5;NDUFA4;ATP5MC1;ATP5F1D;ATP5PO;UQCR11;COX7A2;COX5B;ATP5PF;ATP5F1E;NDUFS5;UQCR10;SURF1;NDUFA1;NDUFV1;COX7C;NDUFB7;NDUFB4;COX5A;ATP5IF1;COX7B;NDUFA2;NDUFB9;NDUFA8;ATP5ME;ATP5PD;UQCRB;NDUFC1;NDUFS7;NDUFB2;NDUFS3;UQCRH;NDUFS6;NDUFA6;NDUFS2;SLC25A4;SDHD;NDUFAB1;NDUFA3;NDUFA12;ATP5F…	LAMP5RELN
5	GO_Biological_Process_2023__Translation (GO:0006412)	-0.47238	-4.33505	0	0	0	166/224	34.96%	MRPL54;RPS27A;MRPL36;MRPL12;MRPL51;MRPL40;AURKAIP1;NDUFA7;MRPS34;RPS7;RPL36AL;RPS4X;RPL7A;FAU;MRPL28;RPL41;RPL26L1;RPS5;MRPL55;MRPL34;RPL18A;RPL10;GADD45GIP1;RPL8;RPL26;MRPS12;RPS9;MRPL2;MRPS28;MRPL14;RPL35A;RPL6;RPS3A;MTG1;EEF1B2;RPL19;MRPS15;VARS1;RPS15;RPS13;RPL12;RPS8;RPL10A;RPL13;RPL22L1;RPS10;EIF5A;DHPS;RPS16;MRPL52;RPLP0;MRPL24;MRPL46;RPS14;RPLP1;RPL11;RPL9;RPL17;MRPL16;MRPL57;RPL21;RPLP2;…	LAMP5RELN
6	GO_Cellular_Component_2023__Large Ribosomal Subunit (GO:0015934)	-0.692739	-4.25261	0	0	0	44/48	24.60%	RPL36AL;RPL7A;RPL41;RPL26L1;RPL18A;RPL8;RPL26;RPL35A;RPL6;RPL19;RPL12;RPL10A;RPL13;RPLP0;RPLP1;RPL11;RPL9;RPL17;RPL21;RPLP2;RPL15;RPL32;RPL3;RPL7;RPL13A;RPL24;RPL27;RPL34;RPL23A;RPL38;UBA52;RPL35;RPL39L;RPL29;RPL4;RPL5;RPL28;RPL14;RPL27A;RPL36;RPL31;RPL18;RPL39;RPL30	LAMP5RELN
7	GO_Cellular_Component_2023__Cytosolic Large Ribosomal Subunit (GO:0022625)	-0.692739	-4.25261	0	0	0	44/48	24.60%	RPL36AL;RPL7A;RPL41;RPL26L1;RPL18A;RPL8;RPL26;RPL35A;RPL6;RPL19;RPL12;RPL10A;RPL13;RPLP0;RPLP1;RPL11;RPL9;RPL17;RPL21;RPLP2;RPL15;RPL32;RPL3;RPL7;RPL13A;RPL24;RPL27;RPL34;RPL23A;RPL38;UBA52;RPL35;RPL39L;RPL29;RPL4;RPL5;RPL28;RPL14;RPL27A;RPL36;RPL31;RPL18;RPL39;RPL30	LAMP5RELN
8	GO_Biological_Process_2023__Mitochondrial ATP Synthesis Coupled Electron Transport (GO:0042775)	-0.6282	-4.21853	0	0	0	49/66	19.18%	COX6A1;NDUFB8;COX4I1;COX8A;UQCRFS1;UQCRQ;NDUFB3;NDUFA7;UQCC3;COX6B1;NDUFB10;NDUFC2;NDUFA4;CYC1;UQCR11;COX7A2;COX5B;NDUFS5;UQCR10;NDUFA1;NDUFV1;COX7C;NDUFB7;NDUFB4;COX5A;COX7B;NDUFA2;NDUFB9;NDUFA8;UQCRB;NDUFC1;NDUFS7;NDUFB2;NDUFS3;CYCS;UQCRH;NDUFS6;NDUFA6;NDUFS2;SDHD;NDUFAB1;NDUFA3;NDUFA12;NDUFB5;COA6;NDUFS8;COX6C;NDUFV2;UQCRC1	LAMP5RELN
9	GO_Biological_Process_2023__Macromolecule Biosynthetic Process (GO:0009059)	-0.481099	-4.20039	0	0	0	109/171	23.40%	RPS27A;MRPL36;MRPL12;MRPL51;RPS7;RPL36AL;RPS4X;RPL7A;FAU;MRPL28;RPL41;RPS5;MRPL55;MRPL34;RPL18A;RPL10;RPL8;RPL26;MRPS12;RPS9;MRPL14;RPL35A;RPL6;RPS3A;EEF1B2;RPL19;MRPS15;RPS15;RPS13;RPL12;RPS8;RPL10A;RPL13;RPS10;EIF5A;DHPS;RPS16;MRPL52;RPLP0;MRPL24;RPS14;RPLP1;RPL11;RPL9;RPL17;RPL21;RPLP2;RPS11;RPS2;RPS21;RPL15;RPS26;RPL32;RPL3;EEF1A2;ZAR1;RPL7;COPS5;RPL13A;MRPL11;RPS18;MRPL43;RPL24;RPS25;MRPL27;…	LAMP5RELN
10	GO_Biological_Process_2023__Cellular Respiration (GO:0045333)	-0.574758	-4.18329	0	0	0	56/83	19.18%	BLOC1S1;COX6A1;ETFB;NDUFB11;NDUFB8;NDUFA13;COX4I1;COX8A;UQCRFS1;UQCRQ;NDUFB3;NDUFA11;NDUFA7;COX6B1;NDUFB10;NDUFC2;NDUFA4;CYC1;UQCR11;COX7A2;COX5B;NR4A3;MTLN;NDUFS5;UQCR10;SURF1;NDUFA1;NDUFV1;COX7C;NDUFB7;NDUFB4;COX5A;COX7B;NDUFA2;NDUFB9;NDUFA8;UQCRB;NDUFC1;NDUFS7;NDUFB2;NDUFS3;CYCS;UQCRH;NDUFS6;NDUFA6;NDUFS2;MDH2;NDUFAB1;NDUFA3;NDUFA12;CHCHD5;NDUFB5;NDUFS8;COX6C;NDUFV2;UQCRC1	LAMP5RELN
11	GO_Biological_Process_2023__Aerobic Electron Transport Chain (GO:0019646)	-0.619617	-4.13882	0	0	0	47/64	19.18%	COX6A1;NDUFB8;COX4I1;COX8A;UQCRFS1;UQCRQ;NDUFB3;NDUFA7;UQCC3;COX6B1;NDUFB10;NDUFC2;NDUFA4;CYC1;UQCR11;COX7A2;COX5B;NDUFS5;UQCR10;NDUFA1;NDUFV1;COX7C;NDUFB7;NDUFB4;COX5A;COX7B;NDUFA2;NDUFB9;NDUFA8;UQCRB;NDUFC1;NDUFS7;NDUFB2;NDUFS3;CYCS;UQCRH;NDUFS6;NDUFA6;NDUFS2;SDHD;NDUFAB1;NDUFA3;NDUFB5;NDUFS8;COX6C;NDUFV2;UQCRC1	LAMP5RELN
12	GO_Biological_Process_2023__Proton Motive Force-Driven ATP Synthesis (GO:0015986)	-0.633237	-4.12095	0	0	0	43/58	18.58%	NDUFB11;NDUFB8;NDUFA13;ATP5MF;ATP5MC3;NDUFB3;NDUFA11;NDUFA7;NDUFB10;NDUFC2;ATP5MC1;ATP5F1D;ATP5PO;ATP5PF;ATP5F1E;NDUFS5;NDUFA1;NDUFV1;ATP5MJ;NDUFB7;NDUFB4;NDUFA2;NDUFB9;NDUFA8;ATP5ME;ATP5PD;NDUFC1;NDUFS7;NDUFB2;NDUFS3;NDUFS6;ATP5MK;NDUFA6;NDUFS2;SDHD;NDUFAB1;NDUFA3;NDUFA12;ATP5F1B;NDUFB5;ATP5PB;NDUFS8;NDUFV2	LAMP5RELN
13	GO_Molecular_Function_2023__Oxidoreduction-Driven Active Transmembrane Transporter Activity (GO:0015453)	-0.646413	-4.06969	0	0	0	40/52	19.18%	NDUFB8;COX4I1;COX8A;COX7A1;NDUFB3;NDUFA7;COX6B1;NDUFB10;NDUFC2;NDUFA4;COX5B;NDUFS5;CYB561D2;UQCR10;NDUFA1;NDUFV1;COX7C;NDUFB7;NDUFB4;COX5A;COX7B;NDUFA2;NDUFB9;NDUFA8;UQCRB;NDUFC1;NDUFS7;NDUFB2;NDUFS3;UQCRH;NDUFS6;NDUFA6;NDUFS2;NDUFA3;NDUFA12;NDUFB5;NDUFS8;NDUFV2;CYB561A3;UQCRC1	LAMP5RELN
14	WikiPathway_2023_Human__Oxidative Phosphorylation WP623	-0.650537	-4.06961	0	0	0	39/51	18.58%	NDUFB8;ATP5MF;ATP5MC3;NDUFA11;NDUFA7;NDUFB10;NDUFC2;NDUFA4;ATP5MC1;ATP5F1D;ATP5PO;ATP5PF;ATP5F1E;NDUFS5;NDUFV1;NDUFB7;NDUFB4;NDUFA2;NDUFA4L2;NDUFB9;NDUFA8;ATP5ME;ATP6AP1;ATP5PD;NDUFC1;NDUFS7;NDUFB2;NDUFS3;NDUFS6;NDUFA6;NDUFS2;NDUFAB1;NDUFA3;ATP5F1B;NDUFB5;ATP6AP2;ATP5PB;NDUFS8;NDUFV2	LAMP5RELN
15	KEGG_2021_Human__Oxidative phosphorylation	-0.522799	-4.06556	0	0	0	68/109	19.18%	COX6A1;NDUFB11;NDUFB8;NDUFA13;ATP5MF;ATP5MC3;COX4I1;COX8A;UQCRFS1;COX7A1;UQCRQ;NDUFB3;NDUFA11;NDUFA7;ATP6V1F;COX6B1;NDUFB10;NDUFC2;NDUFA4;ATP5MC1;ATP5F1D;ATP5PO;CYC1;UQCR11;ATP6V0B;COX7A2;COX5B;ATP5PF;ATP5F1E;NDUFS5;UQCR10;NDUFA1;NDUFV1;COX7C;NDUFB7;NDUFB4;COX5A;COX7B;NDUFA2;NDUFA4L2;NDUFB9;NDUFA8;ATP5ME;ATP6AP1;ATP5PD;UQCRB;NDUFC1;NDUFS7;NDUFB2;NDUFS3;UQCRH;NDUFS6;NDUFA6;NDUFS2;SDHD;NDUFAB1;NDUF…	LAMP5RELN
16	GO_Biological_Process_2023__Proton Motive Force-Driven Mitochondrial ATP Synthesis (GO:0042776)	-0.641324	-4.03426	0	0	0	39/52	18.58%	NDUFB11;NDUFB8;NDUFA13;ATP5MF;NDUFB3;NDUFA11;NDUFA7;NDUFB10;NDUFC2;ATP5F1D;ATP5PO;ATP5PF;ATP5F1E;NDUFS5;NDUFA1;NDUFV1;NDUFB7;NDUFB4;NDUFA2;NDUFB9;NDUFA8;ATP5ME;ATP5PD;NDUFC1;NDUFS7;NDUFB2;NDUFS3;NDUFS6;NDUFA6;NDUFS2;SDHD;NDUFAB1;NDUFA3;NDUFA12;ATP5F1B;NDUFB5;ATP5PB;NDUFS8;NDUFV2	LAMP5RELN
17	GO_Biological_Process_2023__Oxidative Phosphorylation (GO:0006119)	-0.608831	-4.00769	0	0	0	43/60	19.18%	NDUFB11;NDUFB8;NDUFA13;ATP5MF;NDUFB3;NDUFA11;NDUFA7;NDUFB10;NDUFC2;ATP5F1D;ATP5PO;CHCHD10;ATP5PF;ATP5F1E;NDUFS5;NDUFA1;NDUFV1;NDUFB7;NDUFB4;NDUFA2;NDUFB9;NDUFA8;ATP5ME;ATP5PD;UQCRB;NDUFC1;NDUFS7;NDUFB2;NDUFS3;UQCRH;NDUFS6;NDUFA6;NDUFS2;SDHD;NDUFAB1;NDUFA3;NDUFA12;ATP5F1B;NDUFB5;ATP5PB;NDUFS8;NDUFV2;UQCRC1	LAMP5RELN
18	GO_Cellular_Component_2023__Small Ribosomal Subunit (GO:0015935)	-0.691939	-3.96314	0	0	0	32/38	19.21%	RPS27A;RPS7;RPS4X;FAU;RPS5;MRPS12;RPS9;RPS3A;RPS15;RPS13;RPS8;RPS10;RPS16;RPS14;RPS11;RPS2;RPS21;RPS26;RPS18;RPS25;UBA52;RPS17;RPS28;RPS15A;RPS6;RACK1;RPS23;RPS27;RPS4Y1;RPS24;MRPS6;RPS20	LAMP5RELN
19	GO_Cellular_Component_2023__Cytosolic Small Ribosomal Subunit (GO:0022627)	-0.688881	-3.91888	0	0	0	31/37	19.21%	RPS27A;RPS7;RPS4X;FAU;RPS5;MRPS12;RPS9;RPS3A;RPS15;RPS13;RPS8;RPS10;RPS16;RPS14;RPS11;RPS2;RPS21;RPS26;RPS18;RPS25;UBA52;RPS17;RPS28;RPS15A;RPS6;RACK1;RPS23;RPS27;RPS4Y1;RPS24;RPS20	LAMP5RELN
20	MSigDB_Hallmark_2020__Oxidative Phosphorylation	-0.413537	-3.73684	0	0	0	132/196	35.71%	COX6A1;ETFB;NDUFB8;SLC25A11;TIMM13;ATP5MF;TOMM22;ATP5MC3;COX4I1;COX8A;UQCRFS1;UQCRQ;LDHB;NDUFB3;NDUFA7;ATP6V1F;GPX4;COX6B1;NDUFC2;SLC25A5;NDUFA4;ATP5MC1;TIMM8B;HSD17B10;ATP5F1D;ATP5PO;TIMM10;CYC1;MRPL34;UQCR11;ATP6V0B;COX7A2;MRPS12;COX5B;ECH1;ATP5PF;ATP5F1E;LDHA;HTRA2;UQCR10;PDK4;SURF1;NDUFA1;MRPS15;NDUFV1;COX7C;NDUFB7;IDH3G;NDUFB4;COX5A;IDH3B;COX7B;NDUFA2;NDUFA8;ATP5ME;ATP6AP1;ATP5PD;UQCRB;NDUFC…	LAMP5RELN
21	GO_Cellular_Component_2023__Ribosome (GO:0005840)	-0.572767	-3.72068	0	0	0	42/58	24.60%	RPS7;RPL36AL;RPS4X;RPL7A;RPL41;RPS5;RPL18A;RPL8;MRPS12;RPS9;NR0B1;RPL6;RPL19;RPS13;RPL10A;RPS10;RPL11;RPL9;RPL17;RPS11;RPS21;RPL15;RPS26;RPL32;BTF3;RPL13A;RPS18;RPL24;RPS25;RPL27;RPL38;MRPS7;RPS17;RPS28;RPS23;RPS27;RPL36;RPL31;RPL18;RRBP1;RPL39;RPL30	LAMP5RELN
22	KEGG_2021_Human__Coronavirus disease	-0.422457	-3.64788	0	0	0	99/166	25.01%	RPS27A;RPS7;NRP1;RPL36AL;FOS;RPS4X;RPL7A;FAU;RPL41;RPL26L1;C3;RPS5;RPL18A;RPL10;RPL8;RPL26;RPS9;RPS12;F13A1;RPL35A;PIK3R2;RPL6;RPS3A;ACE;RPL19;PRKCG;RPS15;RPS13;RPL12;RPS8;RPL23;RPL10A;RPL13;RPL22L1;RPS10;RPS16;RPLP0;RPS14;RPLP1;RPL11;RPL9;RPL17;RPL21;RPLP2;RPS11;CYBB;RPS2;RPS21;RPL15;RPS26;RPL32;RPL3;RPL7;MASP2;ISG15;RPL13A;RPS18;RPL24;RPS25;RPL27;RPL34;RPL23A;RPL38;UBA52;RPL35;IL12A;RPS17;RPS28…	LAMP5RELN
23	GO_Cellular_Component_2023__Mitochondrial Inner Membrane (GO:0005743)	-0.356985	-3.64513	0	0	0	204/335	35.33%	COX6A1;NDUFB11;SCO2;MRPL54;NDUFB8;NDUFA13;SLC25A11;TIMM17B;TIMM13;ATP5MF;MRPL36;ATP5MC3;MRPL12;COX4I1;COX8A;UQCRFS1;MRPL51;MRPL40;UQCRQ;LDHB;NDUFB3;AURKAIP1;NDUFA11;NDUFA7;MRPS34;UQCC3;COX6B1;NDUFB10;NDUFC2;SLC25A5;NDUFA4;MICOS13;ATP5MC1;NDUFAF3;ENDOG;COA3;ATP5F1D;ATP5PO;TIMM10;MRPL28;IFI6;CYC1;MRPL55;MRPL34;UQCR11;COQ2;GADD45GIP1;MRPS12;COX5B;MRPL2;MRPS28;ATP5PF;MTLN;ATP5F1E;DMAC1;MRPL14;NDUFS5;…	LAMP5RELN
24	GO_Cellular_Component_2023__Respiratory Chain Complex I (GO:0045271)	-0.628839	-3.60271	0	0	0	31/41	20.38%	NDUFB11;NDUFB8;NDUFA13;NDUFB3;NDUFA11;NDUFA7;NDUFB10;NDUFC2;NDUFA4;NDUFS5;NDUFA1;NDUFV1;NDUFB7;NDUFB4;NDUFA2;NDUFB9;NDUFA8;NDUFC1;NDUFS7;NDUFB2;NDUFS3;NDUFS6;NDUFA6;NDUFS2;NDUFAB1;NDUFA3;NDUFA12;NDUFB5;NDUFS8;NDUFV2;WDR93	LAMP5RELN
25	GO_Cellular_Component_2023__Mitochondrial Respiratory Chain Complex I (GO:0005747)	-0.628839	-3.60271	0	0	0	31/41	20.38%	NDUFB11;NDUFB8;NDUFA13;NDUFB3;NDUFA11;NDUFA7;NDUFB10;NDUFC2;NDUFA4;NDUFS5;NDUFA1;NDUFV1;NDUFB7;NDUFB4;NDUFA2;NDUFB9;NDUFA8;NDUFC1;NDUFS7;NDUFB2;NDUFS3;NDUFS6;NDUFA6;NDUFS2;NDUFAB1;NDUFA3;NDUFA12;NDUFB5;NDUFS8;NDUFV2;WDR93	LAMP5RELN
26	KEGG_2021_Human__Parkinson disease	-0.386325	-3.58254	0	0	0	101/214	19.63%	GPR37;COX6A1;NDUFB11;NDUFB8;NDUFA13;RPS27A;ATP5MC3;COX4I1;COX8A;UQCRFS1;COX7A1;UQCRQ;NDUFB3;NDUFA11;NDUFA7;COX6B1;NDUFB10;NDUFC2;SLC25A5;NDUFA4;ATP5MC1;HSPA5;ATP5F1D;ATP5PO;CYC1;SLC18A2;PARK7;UQCR11;COX7A2;ADRM1;COX5B;UBB;ATP5PF;ATP5F1E;NDUFS5;TUBB2A;HTRA2;UQCR10;NDUFA1;NDUFV1;COX7C;NDUFB7;NDUFB4;COX5A;PSMD8;COX7B;NDUFA2;NDUFA4L2;TUBA1B;DUSP1;NDUFB9;NDUFA8;PSMC5;PPIF;DDIT3;TUBA4A;ATP5PD;UQCRB;ITP…	LAMP5RELN
27	WikiPathway_2023_Human__Mitochondrial Complex I Assembly Model OXPHOS System WP4324	-0.569551	-3.52509	0	0	0	32/50	18.58%	NDUFB11;NDUFB8;NDUFA13;NDUFB3;NDUFA7;NDUFB10;NDUFC2;NDUFAF3;DMAC1;NDUFS5;NDUFA1;NDUFV1;NDUFB7;TMEM186;NDUFB4;NDUFA2;NDUFB9;NDUFA8;NDUFC1;TMEM70;NDUFB2;NDUFS3;NDUFS6;NDUFA6;NDUFS2;NDUFAB1;NDUFA3;NDUFA12;NDUFAF4;NDUFB5;DMAC2;NDUFV2	LAMP5RELN
28	GO_Cellular_Component_2023__Organelle Inner Membrane (GO:0019866)	-0.339234	-3.50963	0	0	0	244/354	43.39%	COX6A1;NDUFB11;SCO2;MRPL54;NDUFB8;NDUFA13;SLC25A11;TIMM17B;TIMM13;ATP5MF;MRPL36;ATP5MC3;MRPL12;COX4I1;COX8A;UQCRFS1;MFSD10;MRPL51;MRPL40;UQCRQ;LDHB;NDUFB3;AURKAIP1;NDUFA11;NDUFA7;MRPS34;UQCC3;COX6B1;NDUFB10;NDUFC2;SLC25A5;NDUFA4;MICOS13;ATP5MC1;NDUFAF3;ENDOG;COA3;ATP5F1D;ATP5PO;TIMM10;MRPL28;IFI6;CYC1;MRPL55;MRPL34;UQCR11;COQ2;IFI27;GADD45GIP1;MRPS12;COX5B;MRPL2;MRPS28;ATP5PF;MTLN;ATP5F1E;DMAC1;M…	LAMP5RELN
29	GO_Molecular_Function_2023__NADH Dehydrogenase (Ubiquinone) Activity (GO:0008137)	-0.654272	-3.48025	0	0	0	25/33	18.58%	NDUFB8;NDUFB3;NDUFA7;NDUFB10;NDUFC2;NDUFA4;NDUFS5;NDUFV1;NDUFB7;NDUFB4;NDUFA2;NDUFB9;NDUFA8;NDUFC1;NDUFS7;NDUFB2;NDUFS3;NDUFS6;NDUFA6;NDUFS2;NDUFA3;NDUFA12;NDUFB5;NDUFS8;NDUFV2	LAMP5RELN
30	GO_Biological_Process_2023__Aerobic Respiration (GO:0009060)	-0.53822	-3.46899	0	0	0	37/58	19.18%	BLOC1S1;NDUFB11;NDUFB8;NDUFA13;NDUFB3;NDUFA11;NDUFA7;NDUFB10;NDUFC2;ATP5F1D;CHCHD10;NDUFS5;SURF1;NDUFA1;NDUFV1;NDUFB7;NDUFB4;NDUFA2;NDUFB9;NDUFA8;UQCRB;NDUFC1;NDUFS7;NDUFB2;NDUFS3;UQCRH;NDUFS6;NDUFA6;NDUFS2;MDH2;NDUFAB1;NDUFA3;NDUFA12;NDUFB5;NDUFS8;NDUFV2;UQCRC1	LAMP5RELN
31	GO_Biological_Process_2023__Mitochondrial Respiratory Chain Complex I Assembly (GO:0032981)	-0.541655	-3.42673	0	0	0	35/53	22.61%	NDUFB11;NDUFB8;NDUFA13;NDUFB3;NDUFA11;NDUFB10;NDUFC2;NDUFAF3;DMAC1;NDUFS5;NDUFA1;BCS1L;NDUFB7;TMEM186;NDUFB4;NDUFA2;NDUFB9;NDUFA8;NDUFC1;NDUFS7;NDUFB2;NDUFS3;NDUFAF8;NDUFA6;NDUFS2;NDUFAB1;NDUFA3;NDUFAF4;NDUFB5;TMEM126A;NDUFS8;DMAC2;TIMM21;OXA1L;FOXRED1	LAMP5RELN
32	GO_Biological_Process_2023__NADH Dehydrogenase Complex Assembly (GO:0010257)	-0.541655	-3.42673	0	0	0	35/53	22.61%	NDUFB11;NDUFB8;NDUFA13;NDUFB3;NDUFA11;NDUFB10;NDUFC2;NDUFAF3;DMAC1;NDUFS5;NDUFA1;BCS1L;NDUFB7;TMEM186;NDUFB4;NDUFA2;NDUFB9;NDUFA8;NDUFC1;NDUFS7;NDUFB2;NDUFS3;NDUFAF8;NDUFA6;NDUFS2;NDUFAB1;NDUFA3;NDUFAF4;NDUFB5;TMEM126A;NDUFS8;DMAC2;TIMM21;OXA1L;FOXRED1	LAMP5RELN
33	KEGG_2021_Human__Prion disease	-0.36578	-3.42506	0	0	0	96/221	17.54%	COX6A1;NDUFB11;NDUFB8;NDUFA13;ATP5MC3;COX4I1;COX8A;UQCRFS1;COX7A1;UQCRQ;NDUFB3;CREB5;NDUFA11;NDUFA7;COX6B1;NDUFB10;NDUFC2;SLC25A5;NDUFA4;ATP5MC1;HSPA5;ATP5F1D;ATP5PO;HSPA8;CYC1;UQCR11;COX7A2;ADRM1;COX5B;CAV3;ATP5PF;ATP5F1E;NDUFS5;EGR1;TUBB2A;PIK3R2;UQCR10;NDUFA1;HSPA1A;NDUFV1;COX7C;NDUFB7;NDUFB4;COX5A;GRIN2C;PSMD8;COX7B;NDUFA2;NDUFA4L2;TUBA1B;CYBB;NDUFB9;NDUFA8;PSMC5;PPIF;DDIT3;TUBA4A;ATP5PD;UQCR…	LAMP5RELN
34	GO_Biological_Process_2023__Mitochondrial Electron Transport, NADH To Ubiquinone (GO:0006120)	-0.635021	-3.40673	0	0	0	25/34	18.58%	NDUFB8;NDUFB3;NDUFA7;NDUFB10;NDUFC2;NDUFA4;NDUFS5;NDUFV1;NDUFB7;NDUFB4;NDUFA2;NDUFB9;NDUFA8;NDUFC1;NDUFS7;NDUFB2;NDUFS3;NDUFS6;NDUFA6;NDUFS2;NDUFAB1;NDUFA3;NDUFB5;NDUFS8;NDUFV2	LAMP5RELN
35	GO_Molecular_Function_2023__NADH Dehydrogenase (Quinone) Activity (GO:0050136)	-0.631397	-3.38918	0	0	0	25/34	18.58%	NDUFB8;NDUFB3;NDUFA7;NDUFB10;NDUFC2;NDUFA4;NDUFS5;NDUFV1;NDUFB7;NDUFB4;NDUFA2;NDUFB9;NDUFA8;NDUFC1;NDUFS7;NDUFB2;NDUFS3;NDUFS6;NDUFA6;NDUFS2;NDUFA3;NDUFA12;NDUFB5;NDUFS8;NDUFV2	LAMP5RELN
36	GO_Biological_Process_2023__Mitochondrial Respiratory Chain Complex Assembly (GO:0033108)	-0.456561	-3.36831	0	0	0	50/87	22.68%	PET117;NDUFB11;SCO2;NDUFB8;COX14;NDUFA13;UQCRFS1;NDUFB3;NDUFA11;UQCC3;NDUFB10;NDUFC2;NDUFAF3;COA3;DMAC1;NDUFS5;SURF1;NDUFA1;BCS1L;NDUFB7;TMEM186;NDUFB4;NDUFA2;NDUFB9;PET100;NDUFA8;NDUFC1;NDUFS7;NDUFB2;NDUFS3;NDUFAF8;OMA1;NDUFA6;NDUFS2;SDHAF1;NDUFAB1;NDUFA3;COX16;NDUFAF4;NDUFB5;TMEM126A;NDUFS8;DMAC2;TIMM21;CHCHD7;COX20;TMEM223;OXA1L;FOXRED1;SDHAF2	LAMP5RELN
37	KEGG_2021_Human__Diabetic cardiomyopathy	-0.381856	-3.32132	0	0	0	78/167	19.24%	COX6A1;NDUFB11;TNNI3;NDUFB8;NDUFA13;ATP5MC3;COX4I1;COX8A;UQCRFS1;COX7A1;UQCRQ;NDUFB3;NDUFA11;NDUFA7;COX6B1;NDUFB10;NDUFC2;SLC25A5;NDUFA4;ATP5MC1;ATP5F1D;ATP5PO;CYC1;UQCR11;PLN;COX7A2;COX5B;GAPDH;ATP5PF;ATP5F1E;NDUFS5;PIK3R2;UQCR10;PDK4;NDUFA1;ACE;PRKCG;NDUFV1;COX7C;NDUFB7;NDUFB4;COX5A;TGFBR2;COX7B;NDUFA2;NDUFA4L2;CYBB;NDUFB9;NDUFA8;PPIF;ATP5PD;UQCRB;NDUFC1;NDUFS7;NDUFB2;NDUFS3;UQCRH;NDUFS6;PLCB2;…	LAMP5RELN
38	GO_Biological_Process_2023__Ribonucleoprotein Complex Biogenesis (GO:0022613)	-0.409801	-3.31718	0	0	0	81/115	36.91%	MRPL36;RPS19BP1;RPS7;EMG1;RPS4X;RPL26L1;RPS5;RPL26;MRPS12;BYSL;RPS9;RRP9;RRS1;GRWD1;RPL35A;RPS3A;RPS15;NOP16;RPS13;RPS8;RPS16;RPS14;WDR74;RPL11;PAK1IP1;RPS11;RPL7;EBNA1BP2;ZNF622;RPS25;UTP3;RPL38;NOL6;NIP7;RPS17;RPS28;RPL5;RPS15A;RPS6;PES1;RPS23;RPL14;RPS27;SNU13;RPS24;RBIS;BOP1;RSL24D1;UTP11;ZNF658;WDR46;TMA16;RRP7A;MRTO4;SPPL2B;NOP14;FBL;NOC2L;NOP56;URB2;NGDN;SPATA5L1;RPS19;UTP15;GLUL;HEATR3;FC…	LAMP5RELN
39	GO_Biological_Process_2023__Ribosome Biogenesis (GO:0042254)	-0.38385	-3.28638	0	0	0	99/147	36.91%	MRPL36;RPS19BP1;EXOSC5;RPS7;EMG1;NOC4L;RPS4X;RPL26L1;RPS5;RPL26;MRPS12;BYSL;RPS9;RRP9;RRS1;GRWD1;RPL35A;RPS3A;RPS15;NOP16;RPS13;RPS8;RPS16;RPS14;WDR74;RPL11;POP4;PAK1IP1;RPS11;RPL7;EBNA1BP2;ZNF622;RPS25;RPL27;UTP3;NOL6;NIP7;PIH1D1;DCAF13;RPS17;RPS28;RPL5;RPS15A;RPS6;PES1;RPS23;WDR18;RPL14;RPS27;SNU13;RPS24;RBIS;BOP1;RSL24D1;UTP11;ZNF658;WDR46;LYAR;DDX49;TMA16;RRP7A;NOB1;MRTO4;SPPL2B;NOP14;DKC1;FB…	LAMP5RELN
40	MSigDB_Hallmark_2020__Myc Targets V1	-0.359273	-3.28178	0	0	0	166/193	53.66%	NME1;NHP2;MAD2L1;HSPE1;MYC;CYC1;RPS5;LDHA;RRP9;LSM2;RPL6;MCM7;EEF1B2;NOP16;LSM7;COX5A;RPS10;RPLP0;PSMD8;C1QBP;H2AZ1;RPS2;PRDX4;PSMA7;RAN;PPIA;COPS5;KPNA2;EIF4A1;SNRPD2;CCT7;RPL34;TUFM;MRPS18B;MRPL9;RANBP1;NDUFAB1;SRM;PHB2;PGK1;ERH;PSMC4;VBP1;HSP90AB1;RPS6;RACK1;CCT5;RPL14;PSMB3;HNRNPA1;VDAC1;RFC4;PCBP1;POLD2;APEX1;EIF3D;ILF2;RPL18;EIF4G2;CDK4;BUB3;SLC25A3;SET;MCM4;TRIM28;RUVBL2;SNRPA;PSMD7;CCT2;O…	LAMP5RELN
41	GO_Cellular_Component_2023__Mitochondrial Membrane (GO:0031966)	-0.305976	-3.27363	0	0	0	314/474	44.55%	MTX1;COX6A1;NDUFB11;SCO2;MRPL54;NDUFB8;NDUFA13;SLC25A11;TIMM17B;TIMM13;RPS27A;VRK2;ATP5MF;TOMM22;MRPL36;ATP5MC3;MRPL12;COX4I1;COX8A;UQCRFS1;ABCB6;MRPL51;MRPL40;UQCRQ;LDHB;NDUFB3;AURKAIP1;NDUFA11;NDUFA7;MRPS34;TSPO;UQCC3;COX6B1;NDUFB10;NDUFC2;SLC25A5;NDUFA4;MICOS13;ATP5MC1;IFI27L2;KMO;NDUFAF3;ENDOG;COA3;ATP5F1D;ATP5PO;TIMM10;MRPL28;IFI6;CYC1;MRPL55;MRPL34;UQCR11;COQ2;HINT2;IFI27;GADD45GIP1;MRPS12;…	LAMP5RELN
42	GO_Cellular_Component_2023__Polysomal Ribosome (GO:0042788)	-0.635195	-3.25195	0	0	0	22/28	24.60%	RPL36AL;RPL7A;RPL41;RPL18A;RPL8;NR0B1;RPL6;RPL19;RPL10A;RPL11;RPS21;RPS26;RPL32;RPL24;RPL38;RPS28;RPS23;RPL36;RPL31;RPL18;RPL39;RPL30	LAMP5RELN
43	GO_Cellular_Component_2023__Respiratory Chain Complex IV (GO:0045277)	-0.764375	-3.07574	0	0	0	12/15	8.32%	COX6A1;COX4I1;COX8A;UQCRFS1;COX6B1;NDUFA4;COX7A2;COX5B;COX7C;COX5A;COX7B;NDUFA4L2	LAMP5RELN
44	KEGG_2021_Human__Thermogenesis	-0.329459	-3.02413	0	1.91913e-05	0.001	82/200	19.33%	COX6A1;NDUFB11;NDUFB8;COX14;NDUFA13;ATP5MF;ATP5MC3;COX4I1;COX8A;UQCRFS1;COX7A1;UQCRQ;NDUFB3;CREB5;NDUFA11;NDUFA7;COX6B1;NDUFB10;NDUFC2;NDUFA4;ATP5MC1;HRAS;NDUFAF3;COA3;ATP5F1D;ATP5PO;CYC1;UQCR11;ADRB3;COX7A2;COX5B;ATP5PF;ATP5F1E;NDUFS5;UQCR10;NDUFA1;NDUFV1;COX7C;NDUFB7;NDUFB4;COX5A;COX7B;NDUFA2;NDUFA4L2;NDUFB9;NDUFA8;ATP5ME;ATP5PD;UQCRB;NDUFC1;NDUFS7;NDUFB2;NDUFS3;UQCRH;NDUFAF8;NDUFS6;NDUFA6;NDUF…	LAMP5RELN
45	KEGG_2021_Human__Huntington disease	-0.31412	-3.01394	0	1.87741e-05	0.001	109/267	19.95%	COX6A1;NDUFB11;NDUFB8;NDUFA13;DCTN3;ATP5MC3;COX4I1;COX8A;UQCRFS1;COX7A1;UQCRQ;ATG101;NDUFB3;CREB5;NDUFA11;NDUFA7;COX6B1;NDUFB10;NDUFC2;SLC25A5;NDUFA4;ATP5MC1;ATP5F1D;ATP5PO;CYC1;UQCR11;BDNF;COX7A2;ADRM1;COX5B;POLR2L;ATP5PF;ATP5F1E;NDUFS5;TUBB2A;UQCR10;NDUFA1;POLR2K;NDUFV1;COX7C;POLR2G;NDUFB7;NDUFB4;COX5A;PSMD8;AP2M1;COX7B;POLR2I;DNAL4;NDUFA2;DNAH8;NDUFA4L2;TUBA1B;NDUFB9;NDUFA8;PSMC5;AP2S1;PPIF;DN…	LAMP5RELN
46	KEGG_2021_Human__Non-alcoholic fatty liver disease	-0.36331	-2.96841	0	1.83746e-05	0.001	61/134	19.63%	COX6A1;NDUFB11;NDUFB8;NDUFA13;COX4I1;COX8A;UQCRFS1;COX7A1;UQCRQ;NDUFB3;NDUFA11;NDUFA7;COX6B1;NDUFB10;NDUFC2;NDUFA4;FOS;CYC1;UQCR11;COX7A2;COX5B;NDUFS5;PIK3R2;UQCR10;NDUFA1;NDUFV1;COX7C;NDUFB7;NDUFB4;COX5A;COX7B;NDUFA2;NDUFA4L2;NDUFB9;NDUFA8;DDIT3;MLX;UQCRB;NDUFC1;NDUFS7;NDUFB2;NDUFS3;CYCS;UQCRH;NDUFS6;NDUFA6;NDUFS2;SDHD;NDUFAB1;NDUFA3;NDUFA12;PRKAG1;NDUFB5;NDUFS8;ATF4;GSK3A;BAX;COX6C;NDUFV2;UQCRC…	LAMP5RELN
47	GO_Biological_Process_2023__rRNA Metabolic Process (GO:0016072)	-0.409718	-2.96124	0	1.79918e-05	0.001	59/82	38.23%	EXOSC5;RPS7;EMG1;NOC4L;RPL26;BYSL;RRP9;RPL35A;RPS15;RPS16;WDR74;RPL11;POP4;TRIR;RPL7;EBNA1BP2;RPS25;RPL27;NOL6;PIH1D1;DCAF13;RPS17;RPS28;RPL5;RPS6;PES1;WDR18;RPL14;RPS27;RPS24;LYAR;DDX49;SIRT7;RRP7A;NOB1;POLR1G;MRTO4;SPPL2B;NOP14;DKC1;NIFK;FBL;DDX54;NOP56;DEDD2;NOP53;EXOSC3;RPS19;UTP15;GTF3A;EXOSC9;WDR55;NOLC1;SBDS;UTP20;WDR36;DDX27;RRP36;MARS1	LAMP5RELN
48	GO_Biological_Process_2023__ncRNA Processing (GO:0034470)	-0.387699	-2.95837	0	1.76247e-05	0.001	64/96	36.40%	POP7;RPP21;EXOSC5;RPS7;EMG1;NOC4L;RPL26;INTS5;BYSL;RRP9;RPL35A;RPS15;TSEN34;RPS16;WDR74;RPL11;POP4;RPL7;EBNA1BP2;RPS25;RPL27;NOL6;PIH1D1;DCAF13;THG1L;TUT1;RPS17;RPS28;RPL5;RPS6;PES1;WDR18;RPL14;RPS27;RPS24;LYAR;DDX49;RRP7A;NOB1;MRTO4;SPPL2B;NOP14;DKC1;INTS12;FBL;DDX54;NOP56;NOP53;EXOSC3;RPS19;KARS1;UTP15;EXOSC9;WDR55;NOLC1;POP1;INTS11;INTS13;ADAT1;SBDS;UTP20;INTS1;WDR36;DDX27	LAMP5RELN
49	GO_Biological_Process_2023__Energy Derivation By Oxidation Of Organic Compounds (GO:0015980)	-0.516036	-2.94638	0	1.72722e-05	0.001	25/39	21.25%	COX6A1;COX4I1;COX8A;UQCRQ;COX6B1;NDUFA4;CYC1;UQCR11;ADRB3;COX7A2;COX5B;NR4A3;MTLN;UQCR10;COX7C;COX5A;COX7B;UQCRB;CYCS;UQCRH;CHCHD5;COX6C;UQCRC1;MT3;PPARGC1A	LAMP5RELN
50	WikiPathway_2023_Human__Nonalcoholic Fatty Liver Disease WP4396	-0.361937	-2.92718	0	1.69335e-05	0.001	60/131	19.63%	COX6A1;NDUFB11;NDUFB8;NDUFA13;COX4I1;COX8A;UQCRFS1;COX7A1;UQCRQ;NDUFB3;NDUFA11;NDUFA7;COX6B1;NDUFB10;NDUFC2;NDUFA4;CYC1;UQCR11;COX7A2;COX5B;NDUFS5;PIK3R2;UQCR10;NDUFA1;NDUFV1;COX7C;NDUFB7;NDUFB4;COX5A;COX7B;NDUFA2;NDUFA4L2;NDUFB9;NDUFA8;DDIT3;MLX;UQCRB;NDUFC1;NDUFS7;NDUFB2;NDUFS3;CYCS;UQCRH;NDUFS6;NDUFA6;NDUFS2;SDHD;NDUFAB1;NDUFA3;NDUFA12;PRKAG1;NDUFB5;NDUFS8;ATF4;GSK3A;BAX;COX6C;NDUFV2;UQCRC1;XB…	LAMP5RELN
51	GO_Biological_Process_2023__Mitochondrial Gene Expression (GO:0140053)	-0.382193	-2.92235	0	1.66078e-05	0.001	69/101	38.77%	MRPL54;MRPL36;MRPL12;MRPL51;MRPL40;NDUFA7;MRPS34;MRPL28;MRPL55;MRPL34;GADD45GIP1;MRPS12;MRPL2;MRPS28;MRPL14;MTG1;MRPS15;TWNK;MRPL52;MRPL24;MRPL46;MRPL16;MRPL57;MRPL17;MRPL11;MRPL43;MRPL27;MRPS2;MRPL47;MRPS7;MRPS18B;MRPL9;MRPL49;CHCHD1;MRPL58;MRPS10;MRPS33;MRPS18A;MRPL21;MRPS26;MRPL44;POLRMT;MRPL4;MRPS6;MRPL10;TBRG4;MRPS21;MRPL20;MRPL35;MRPL41;MRPS22;MRPL50;MRPS14;FASTK;MRPS23;MRPS18C;MRPL23;MRPL3…	LAMP5RELN
52	WikiPathway_2023_Human__Mitochondrial Complex IV Assembly WP4922	-0.561759	-2.91723	0	1.62945e-05	0.001	20/30	19.33%	COX6A1;PET117;COX14;COX4I1;COX8A;COX6B1;NDUFA4;COA3;COX7A2;COX5B;SURF1;COX7C;COX5A;COX7B;PET100;HIGD1A;COX16;COA6;COX6C;COX20	LAMP5RELN
53	GO_Biological_Process_2023__Ribosomal Small Subunit Biogenesis (GO:0042274)	-0.403634	-2.9165	0	1.59927e-05	0.001	61/80	41.48%	RPS19BP1;TSR3;RPS7;EMG1;RPS4X;RPS5;MRPS12;RPS9;RRP9;RPS3A;RPS15;RPS13;RPS8;RPS16;RPS14;RPS11;RPS25;UTP3;NOL6;MRPS7;ERAL1;RPS17;RPS28;RPS15A;RPS6;RPS23;RPS27;SNU13;RPS24;UTP11;WDR46;RPSA;RRP7A;NOB1;SPPL2B;NOP14;FBL;NOP56;NGDN;RPS19;UTP15;FCF1;NOM1;NOL7;SURF6;RIOK1;MRPS11;UTP20;PNO1;NPM1;WDR3;RIOK2;WDR36;LTV1;DNTTIP2;RRP36;HEATR1;NOL11;MPHOSPH10;RPS27L;DIMT1	LAMP5RELN
54	GO_Biological_Process_2023__Mitochondrial Translation (GO:0032543)	-0.383617	-2.90174	0	1.5702e-05	0.001	44/96	17.98%	MRPL54;MRPL36;MRPL12;MRPL51;MRPL40;NDUFA7;MRPS34;MRPL28;MRPL55;MRPL34;GADD45GIP1;MRPS12;MRPL2;MRPS28;MRPL14;MTG1;MRPS15;MRPL52;MRPL24;MRPL46;MRPL16;MRPL57;MRPL17;MTRF1L;MRPL11;MRPL43;MRPL27;MRPS2;TUFM;MRPL47;MRPS7;MRPS18B;MRPL9;MRPL49;CHCHD1;MRPL58;MRPS10;MRPS33;MRPS18A;MRPL21;MRPS26;MRPL44;MRPL4;MRPS6	LAMP5RELN
55	GO_Biological_Process_2023__Gene Expression (GO:0010467)	-0.298248	-2.89893	0	1.54216e-05	0.001	151/274	35.56%	RPS27A;MRPL36;MRPL12;MRPL51;EXOSC5;RPS7;RPL36AL;PRPH2;RPS4X;RPL7A;FAU;MRPL28;RPL41;RPS5;MRPL55;MRPL34;RPL18A;RPL10;RPL8;RPL26;MRPS12;RPS9;MRPL14;RPL35A;STUB1;RPL6;RPS3A;RPL19;MRPS15;RPS15;TSPAN15;RPS13;RPL12;RPS8;RPL10A;RPL13;RPS10;DHPS;RPS16;MRPL52;RPLP0;MRPL24;RPS14;NXT1;RPLP1;RPL11;RPL9;RPL17;RPL21;RPLP2;RPS11;RPS2;RPS21;RPL15;RPS26;RPL32;RPL3;EEF1A2;ZAR1;RPL7;COPS5;RPL13A;TESC;THOC6;MRPL11;ZN…	LAMP5RELN
56	GO_Biological_Process_2023__Extracellular Matrix Organization (GO:0030198)	0.316881	2.89228	0	0.00124058	0.001	56/109	22.99%	SERPINF2;NDNF;SCX;PXDN;SMOC2;COL1A1;COL9A1;COL12A1;ADAMTS12;ADAMTS3;ELN;ADAMTS1;ADAMTS17;COL5A1;NPNT;ADAMTS16;SLC39A8;PLG;COL11A1;COL27A1;ADAMTS8;LOXL2;NID1;LCP1;SMOC1;ADAM15;COL14A1;BMP1;COL5A2;COL23A1;THSD4;COL11A2;MANSC4;COL4A6;COL24A1;PLOD3;MMP17;COL19A1;TGFB1;COL7A1;MMP28;TGFBR1;GAS6;CTSS;SH3PXD2B;ADAMTS13;ADAMTS10;CTSV;COL28A1;ADAMTS2;DDR2;COL18A1;GFOD2;COL4A3;HPSE2;QSOX1	LAMP5RELN
57	GO_Cellular_Component_2023__Mitochondrial Proton-Transporting ATP Synthase Complex (GO:0005753)	-0.686827	-2.88955	0	1.48898e-05	0.001	13/16	17.01%	ATP5MF;ATP5MC3;ATP5MC1;ATP5F1D;ATP5PO;ATP5PF;ATP5F1E;ATP5MJ;ATP5ME;ATP5PD;ATP5MK;ATP5F1B;ATP5PB	LAMP5RELN
58	GO_Cellular_Component_2023__Proton-Transporting ATP Synthase Complex (GO:0045259)	-0.686827	-2.88955	0	1.48898e-05	0.001	13/16	17.01%	ATP5MF;ATP5MC3;ATP5MC1;ATP5F1D;ATP5PO;ATP5PF;ATP5F1E;ATP5MJ;ATP5ME;ATP5PD;ATP5MK;ATP5F1B;ATP5PB	LAMP5RELN
59	GO_Biological_Process_2023__rRNA Processing (GO:0006364)	-0.359411	-2.75236	0	2.92748e-05	0.002	63/96	38.04%	NHP2;TSR3;EXOSC5;RPS7;EMG1;NOC4L;RPL26;RRP9;RPL35A;RPS15;MRM1;RPS16;RPS14;WDR74;RPL11;POP4;RPL7;EBNA1BP2;EIF6;RPS25;RPL27;NOL6;PIH1D1;DCAF13;RPS17;RPS28;RPL5;RPS6;PES1;WDR18;RPL14;RPS27;SNU13;RPS24;LYAR;DDX49;RRP7A;NOB1;MAK16;MRTO4;SPPL2B;NOP14;DKC1;FBL;DDX54;NOP56;NOP53;EXOSC3;RPS19;UTP15;EXOSC9;WDR55;NOLC1;ERI1;RIOK1;SBDS;UTP20;WDR3;RIOK2;WDR36;DDX27;NSA2;RRP36	LAMP5RELN
60	GO_Biological_Process_2023__Ribosomal Large Subunit Biogenesis (GO:0042273)	-0.432078	-2.74542	0	4.31804e-05	0.003	36/50	35.90%	RPL26L1;RPL10;RPL26;RRS1;RPL35A;RPL6;NOP16;RPLP0;WDR74;RPL11;PAK1IP1;RPL7;EBNA1BP2;PPAN;EIF6;ZNF622;RPL23A;NIP7;RPL5;PES1;RPL14;RSL24D1;TRAF7;TMA16;MAK16;MRTO4;BRIX1;MRPL20;NOC2L;NOP53;SPATA5L1;HEATR3;GTF3A;SURF6;NPM1;WDR12	LAMP5RELN
61	GO_Biological_Process_2023__Defense Response To Gram-positive Bacterium (GO:0050830)	-0.564156	-2.73787	0	4.24725e-05	0.003	20/25	24.07%	IL18;H2BC21;ROMO1;FAU;RNASE1;GBP2;PPP1R11;PGLYRP1;IL12A;GBP4;STAB2;MR1;HLA-A;EHHADH;LYG2;HMGB2;TNFRSF14;RPL39;LYG1;CHGA	LAMP5RELN
62	GO_Biological_Process_2023__Extracellular Structure Organization (GO:0043062)	0.355325	2.7203	0	0.00744347	0.012	36/65	22.86%	NDNF;PXDN;SMOC2;COL1A1;COL9A1;ADAMTS12;ADAMTS3;ADAMTS1;ADAMTS17;COL5A1;NPNT;ADAMTS16;SLC39A8;COL11A1;ADAMTS8;SMOC1;COL14A1;COL5A2;TEX14;COL23A1;THSD4;MANSC4;COL4A6;COL24A1;MMP17;COL19A1;COL7A1;MMP28;TGFBR1;ADAMTS13;ADAMTS10;COL28A1;ADAMTS2;GFOD2;COL4A3;HPSE2	LAMP5RELN
63	MSigDB_Hallmark_2020__UV Response Up	-0.325486	-2.69603	0	6.96458e-05	0.004	93/134	41.30%	SELENOW;BMP2;ATP6V1F;CCK;BTG3;FOS;FOSB;NR4A1;UROD;ATF3;NPTX2;TYRO3;AP2S1;PPIF;H2AX;TUBA4A;CEBPG;TAP1;IGFBP2;TACR3;BTG2;SLC25A4;FKBP4;TST;FEN1;HYAL2;ENO2;NFKBIA;SIGMAR1;CLCN2;GRINA;PSMC3;CDKN1C;LHX2;LYN;JUNB;DGAT1;MSX1;RFC4;FURIN;ALAS1;E2F5;CCNE1;PLCL1;PDAP1;HSPA2;SLC6A8;NXF1;DNAJA1;WIZ;CYB5R1;CLTB;CDC34;PRKCD;GCH1;ASNS;ABCB1;CNP;PPP1R2;PPT1;HSPA13;TARS1;OLFM1;POLE3;BTG1;PARP2;MRPL23;ACAA1;BSG;POL…	LAMP5RELN
64	KEGG_2021_Human__Amyotrophic lateral sclerosis	-0.265151	-2.66185	0	8.22484e-05	0.005	114/317	19.95%	COX6A1;NDUFB11;NDUFB8;NDUFA13;DCTN3;ATP5MC3;COX4I1;COX8A;UQCRFS1;COX7A1;UQCRQ;ATG101;NDUFB3;NDUFA11;NDUFA7;TNFRSF1B;COX6B1;NDUFB10;NDUFC2;NDUFA4;ATP5MC1;HSPA5;ATP5F1D;ATP5PO;CYC1;UQCR11;COX7A2;ADRM1;COX5B;CHCHD10;ATP5PF;ATP5F1E;NDUFS5;TUBB2A;UQCR10;NDUFA1;CAT;NDUFV1;COX7C;NDUFB7;NDUFB4;COX5A;GRIN2C;PSMD8;COX7B;DNAL4;NXT1;NDUFA2;DNAH8;NDUFA4L2;TUBA1B;NDUFB9;NDUFA8;PSMC5;DDIT3;DNALI1;TUBA4A;ATP5PD;…	LAMP5RELN
65	GO_Biological_Process_2023__External Encapsulating Structure Organization (GO:0045229)	0.350945	2.66113	0	0.0103381	0.024	28/64	13.74%	NDNF;PXDN;SMOC2;COL1A1;COL9A1;ADAMTS12;HRNR;ADAMTS3;ADAMTS1;ADAMTS17;COL5A1;NPNT;ADAMTS16;SLC39A8;COL11A1;ADAMTS8;SMOC1;COL14A1;COL5A2;COL23A1;THSD4;MANSC4;COL4A6;COL24A1;MMP17;COL19A1;COL7A1;MMP28	LAMP5RELN
66	GO_Molecular_Function_2023__Active Monoatomic Ion Transmembrane Transporter Activity (GO:0022853)	-0.598511	-2.65719	0	8.09632e-05	0.005	14/19	19.81%	COX4I1;COX8A;COX7A1;COX6B1;SLC18A2;COX5B;UQCR10;COX7C;COX5A;COX7B;UQCRB;UQCRH;UQCRC1;SLC47A1	LAMP5RELN
67	GO_Cellular_Component_2023__Collagen-Containing Extracellular Matrix (GO:0062023)	0.239331	2.64825	0	0.00868404	0.027	86/223	18.08%	EFEMP1;SERPINF2;LTBP2;ICAM1;PXDN;SMOC2;PLSCR1;FBLN1;COL1A1;COL9A1;COL12A1;COL21A1;HMCN2;EMILIN2;ITIH5;IGFBP7;GDF15;DCN;HSPG2;FREM2;ANGPTL5;LAMA2;LGALS3;COL20A1;HRNR;AGT;ADAMTS3;ANGPT1;ELN;ADAMTS1;COL5A1;ANXA11;FBLN5;NPNT;TNC;PLG;COL11A1;COL27A1;ADAMTS8;FBLN2;TNXB;LOXL2;NID1;SERPINB8;SULF1;ZP3;SMOC1;CTHRC1;FGF10;AEBP1;FIBCD1;SSC5D;COL14A1;VWF;LAMA3;FREM3;COL5A2;COL23A1;PODN;SDC3;THSD4;COL11A2;ANXA…	LAMP5RELN
68	GO_Biological_Process_2023__Ribosome Assembly (GO:0042255)	-0.442755	-2.64711	0	7.97176e-05	0.005	30/41	35.53%	RPS5;RPL10;RRS1;RPL6;RPS15;RPLP0;RPS14;C1QBP;RPL11;PPAN;EIF6;MRPS2;RPL23A;MRPS7;ERAL1;RPS28;RPL5;NGRN;RPS27;TRAF7;RPSA;RRP7A;BRIX1;MRPL20;NOP53;RPS19;NOA1;SBDS;MRPS11;NPM1	LAMP5RELN
69	KEGG_2021_Human__Bile secretion	0.382131	2.64323	0	0.00719535	0.027	21/47	14.32%	ABCG2;AQP8;LDLR;ABCC4;FXYD2;ABCC2;ABCG8;ADCY7;AQP4;ADCY8;NR1H4;SLC10A1;BAAT;SLC4A5;SLC51A;CFTR;ATP1A2;SLC4A4;SLC22A1;RXRA;EPHX1	LAMP5RELN
70	KEGG_2021_Human__Arrhythmogenic right ventricular cardiomyopathy	0.343599	2.63516	0	0.00620289	0.028	41/64	32.07%	GJA1;ITGB4;ITGA8;ITGA5;CACNA2D4;CACNG6;TCF7L1;LAMA2;ATP2A3;ITGA1;CACNG1;ITGA2B;CACNG4;CACNG5;DSC2;JUP;ITGA10;ITGA9;ATP2A1;CACNA2D3;TCF7L2;CACNA2D1;CACNA2D2;ITGA6;CACNA1C;ITGB5;SLC8A2;SGCD;RYR2;LMNA;CACNG2;CACNG3;DMD;DAG1;CACNB2;SLC8A1;CACNG8;ITGA3;CACNG7;SLC8A3;CTNNA2	LAMP5RELN
71	WikiPathway_2023_Human__Arrhythmogenic Right Ventricular Cardiomyopathy WP2118	0.34638	2.63372	0	0.00531676	0.028	38/61	30.59%	GJA1;ITGB4;ITGA8;ITGA5;CACNA2D4;CACNG6;TCF7L1;LAMA2;ITGA1;CACNG1;ITGA2B;CACNG4;CACNG5;DSC2;JUP;ITGA10;ITGA9;CACNA2D3;TCF7L2;CACNA2D1;CACNA2D2;ITGA6;CACNA1C;ITGB5;SGCD;RYR2;LMNA;CACNG2;CACNG3;ACTN1;DMD;DAG1;CACNB2;ACTN4;SLC8A1;CACNG8;ITGA3;CACNG7	LAMP5RELN
72	GO_Biological_Process_2023__Cellular Response To cAMP (GO:0071320)	0.460282	2.60482	0	0.00620289	0.036	12/26	12.76%	ZFP36L1;AQP8;RAPGEF3;HCN4;SLC26A6;HCN3;KCNQ1;CFTR;SLC26A3;INPP5K;EZR;PDE2A	LAMP5RELN
73	GO_Cellular_Component_2023__Small-Subunit Processome (GO:0032040)	-0.381484	-2.60007	0	0.000196275	0.014	50/69	41.48%	RPS27A;RPS19BP1;RPS7;EMG1;NOC4L;RPS4X;RPS5;MRPS12;RPS9;RRP9;RPS3A;RPS13;RPS8;RPS16;RPS14;RPS11;UTP3;NOL6;DCAF13;RPS17;RPS28;RPS15A;RPS6;RPS23;FBLL1;RPS27;SNU13;RPS24;UTP11;WDR46;RRP7A;SPPL2B;NOP14;FBL;NOP56;NGDN;RPS19;UTP15;FCF1;NOL7;UTP20;PNO1;WDR3;WDR36;PDCD11;DNTTIP2;HEATR1;MPHOSPH10;UTP14A;DIMT1	LAMP5RELN
74	GO_Biological_Process_2023__Collagen Fibril Organization (GO:0030199)	0.428658	2.5852	0	0.0068921	0.046	19/32	20.63%	SERPINF2;SCX;PXDN;COL1A1;COL12A1;ADAMTS3;COL5A1;COL11A1;COL27A1;LOXL2;COL14A1;BMP1;COL5A2;COL11A2;PLOD3;TGFBR1;ADAMTS2;DDR2;COL18A1	LAMP5RELN
75	WikiPathway_2023_Human__Markers Of Kidney Cell Lineage WP5236	0.434234	2.55325	0	0.00843593	0.063	17/33	15.94%	RARA;NOTCH1;EGLN2;NPHS1;DCN;WNT4;EYA1;PECAM1;TNC;PDGFRB;ACTA2;TGFB1;FAT4;AXIN2;EGLN1;RARB;SALL1	LAMP5RELN
76	GO_Molecular_Function_2023__Voltage-Gated Calcium Channel Activity (GO:0005245)	0.416484	2.55208	0	0.00766902	0.063	27/38	34.83%	TMC1;CACNA2D4;CACNG6;SCN9A;SCN7A;TMC2;CACNG4;CACNG5;RYR1;CACNA1G;SCN11A;CACNA2D3;CACNA2D1;TPCN2;CACNA2D2;CACNA1C;CACNA1I;CACNG2;CACNG3;CACNA1E;CACNB2;CACNA1B;CACNG8;CACNG7;CACNA1A;SCN3A;PKD2	LAMP5RELN
77	KEGG_2021_Human__Alzheimer disease	-0.257876	-2.55178	0	0.000412469	0.03	124/306	25.46%	PSENEN;COX6A1;NDUFB11;NDUFB8;NDUFA13;ATP5MC3;CDK5;COX4I1;COX8A;UQCRFS1;COX7A1;UQCRQ;ATG101;NDUFB3;FRAT2;NDUFA11;NDUFA7;COX6B1;NDUFB10;NDUFC2;FADD;SLC25A5;NDUFA4;ATP5MC1;HRAS;HSD17B10;ATP5F1D;ATP5PO;FRAT1;CYC1;UQCR11;COX7A2;ADRM1;COX5B;GAPDH;ATP5PF;ATP5F1E;NDUFS5;TUBB2A;PIK3R2;UQCR10;NDUFA1;WNT7B;NDUFV1;COX7C;NDUFB7;NDUFB4;COX5A;GRIN2C;PSMD8;COX7B;WNT10B;NDUFA2;NDUFA4L2;TUBA1B;CYBB;NDUFB9;NDUFA8;P…	LAMP5RELN
78	GO_Biological_Process_2023__Vascular Endothelial Growth Factor Receptor Signaling Pathway (GO:0048010)	0.484	2.55144	0	0.00702994	0.063	16/24	23.07%	VAV1;FLT1;PRKD2;HSPB1;SULF1;VEGFA;NELL1;PTK2B;PDCD6;BCAR1;PRKD1;DAB2IP;VAV2;MAPKAPK2;SRC;VEGFD	LAMP5RELN
79	KEGG_2021_Human__Taste transduction	0.373091	2.53455	0	0.00792061	0.076	26/47	25.41%	TAS2R10;ITPR3;SCN9A;TAS2R46;SCNN1G;PKD1L3;ASIC2;HCN4;HTR3B;ADCY8;TAS2R31;TAS2R30;TAS2R19;PLCB3;TAS2R13;GRM1;TAS2R14;TAS2R20;GNB3;CHRM3;GRM4;TAS2R4;CACNA1C;GABRA6;HTR1E;PLCB4	LAMP5RELN
80	GO_Cellular_Component_2023__Mitochondrial Envelope (GO:0005740)	-0.312804	-2.52215	0	0.000609606	0.042	103/126	53.76%	BLOC1S1;NDUFA13;TIMM13;VRK2;ABCB6;TRIAP1;CHCHD2;IFI27L2;TIMM8B;TIMM10;IFI6;IFI27;PRELID1;CHCHD10;TIMM8A;HTRA2;NDUFA1;NDUFB7;NDUFA2;ARL2;STOML2;HAX1;NDUFA8;TMEM70;NDUFS3;CYCS;ACAD11;BOK;OMA1;NDUFA6;DIABLO;SLC25A4;SDHD;NDUFAB1;COA4;CHCHD5;NDUFAF4;ATP5F1B;TMEM14B;SOD1;COA6;ADAP2;NGRN;BNIP1;VDAC1;IKBKE;NAT8L;OXA1L;TMEM14C;ARL2BP;GATM;PRELID3B;COA7;REXO2;VDAC2;COX19;NME4;COX17;ACADVL;TIMM10B;TIMM29;GP…	LAMP5RELN
81	KEGG_2021_Human__Pathways of neurodegeneration	-0.240162	-2.49795	0	0.000788512	0.055	157/402	25.46%	GPR37;COX6A1;NDUFB11;NDUFB8;NDUFA13;RPS27A;DCTN3;ATP5MC3;CDK5;COX4I1;COX8A;UQCRFS1;COX7A1;UQCRQ;ATG101;NDUFB3;FRAT2;NDUFA11;NDUFA7;TNFRSF1B;COX6B1;NDUFB10;NDUFC2;FADD;SLC25A5;NDUFA4;ATP5MC1;HRAS;HSD17B10;HSPA5;ATP5F1D;ATP5PO;FRAT1;CYC1;PARK7;UQCR11;BDNF;COX7A2;ADRM1;COX5B;UBB;ATP5PF;ATP5F1E;NDUFS5;TUBB2A;HTRA2;UQCR10;NDUFA1;PRKCG;CAT;WNT7B;NDUFV1;COX7C;NDUFB7;TRPC3;NDUFB4;COX5A;GRIN2C;PSMD8;COX7B…	LAMP5RELN
82	WikiPathway_2023_Human__Hematopoietic Stem Cell Differentiation WP2849	0.423715	2.49713	0	0.0105449	0.106	16/32	11.03%	MYB;NFATC2;VAV1;NOTCH1;CIITA;TRAF3IP3;STAT5A;RUNX1;TNXB;ITGA2B;PIM1;LMO2;ZNF835;CBFA2T3;CSF1;SEC14L2	LAMP5RELN
83	GO_Cellular_Component_2023__Mitochondrial Ribosome (GO:0005761)	-0.533155	-2.49561	0	0.000789584	0.055	18/22	34.27%	MRPL51;MRPL40;NDUFA7;MRPL28;MRPL34;MRPS12;MRPL14;MTG1;MRPL57;MRPL43;MRPL9;MRPL49;MRPL20;MRPL35;MRPS22;MRPS14;MRPL18;MRPL13	LAMP5RELN
84	WikiPathway_2023_Human__Translation Factors WP107	-0.407677	-2.49061	0	0.00080279	0.057	42/48	51.03%	EEF1B2;EIF5A;EIF1;EEF1A2;EIF4A2;EIF6;EIF4A1;EIF3G;EIF3I;EEF2;EIF1AY;EIF2B5;EIF4EBP1;EEF1A1;EIF2B2;GSPT2;EIF3D;EIF3C;EIF1AX;EIF2B4;CLUH;EEF1D;EIF2S2;EIF2B1;EIF4EBP2;EIF3F;EIF2S3;EIF5;EIF4G1;EIF4H;EIF4B;PAIP1;EIF2S1;EIF3A;EIF3B;EIF2AK1;EIF3E;EIF3J;ETF1;EIF3H;PABPC1;EIF5B	LAMP5RELN
85	MSigDB_Hallmark_2020__Interferon Gamma Response	0.246893	2.48211	0	0.0114133	0.121	47/141	14.54%	BANK1;CASP4;ICAM1;PLSCR1;USP18;IL4R;IFI44;OAS2;OAS3;DDX60;CIITA;PLA2G4A;NLRC5;IFITM3;CD274;IFI44L;FPR1;CASP7;PSMB9;CD38;IL18BP;C1R;PTPN6;NOD1;IL2RB;IFIH1;RNF31;DHX58;SP110;PARP12;PIM1;FAS;GPR18;EPSTI1;MT2A;TXNIP;TRIM14;IFIT3;PML;MX1;HLA-DMA;LCP2;APOL6;PSMA2;MVP;STAT2;STAT4	LAMP5RELN
86	GO_Molecular_Function_2023__rRNA Binding (GO:0019843)	-0.420585	-2.47276	0	0.00101954	0.07	31/43	37.28%	EMG1;RPS5;RPS9;RRS1;RPS13;RPL12;RPLP0;RPS14;RBM34;RPL11;RPL17;MRPL16;PPAN;MRPL11;MRPS7;ERAL1;TST;RPL5;MRPS18A;NGRN;MRPS6;CIRBP;NOP53;MRPS18C;GTF3A;ERI1;MRPL18;SBDS;MRPS11;NPM1;RPS3	LAMP5RELN
87	GO_Cellular_Component_2023__Voltage-Gated Calcium Channel Complex (GO:0005891)	0.410983	2.46135	0	0.0131036	0.142	25/36	32.15%	CACNA2D4;CACHD1;CACNG6;SCN9A;SCN7A;CATSPERD;STAC3;CACNA1G;SCN11A;CATSPERG;CACNA2D3;CACNA2D1;CACNA2D2;CATSPERE;CACNA1C;CACNA1I;CACNG3;CACNA1E;CATSPER2;PDE4D;CACNB2;CACNA1B;CACNG8;CACNG7;CACNA1A	LAMP5RELN
88	GO_Cellular_Component_2023__Basolateral Plasma Membrane (GO:0016323)	0.259434	2.44446	0	0.0140112	0.161	39/127	12.58%	SLC4A9;CA4;HEPH;SLC7A7;CDH17;AQP8;LDLR;SLC22A9;CD44;ERBB3;ABCC4;SLC22A6;RAB17;ABCC6;ENPP1;EPB41;SLC39A8;NOD1;SLC6A13;AQP4;ADCY8;VSIG1;SLC10A1;SLC26A6;KCNQ1;EPCAM;ERBB2;C5AR1;SLC40A1;TRPC4;SLC14A1;SLCO1C1;SLC51A;SLC26A7;TEK;B4GALT1;SLC4A4;EZR;SLC22A1	LAMP5RELN
89	KEGG_2021_Human__Dilated cardiomyopathy	0.300772	2.44397	0	0.0132328	0.161	46/75	31.94%	ITGB4;ITGA8;ITGA5;CACNA2D4;CACNG6;LAMA2;ATP2A3;AGT;ITGA1;ADCY7;TPM2;CACNG1;ADCY8;ITGA2B;CACNG4;CACNG5;ITGA10;ITGA9;ATP2A1;TGFB1;CACNA2D3;CACNA2D1;CACNA2D2;ITGA6;CACNA1C;ITGB5;SLC8A2;TGFB3;SGCD;RYR2;LMNA;CACNG2;CACNG3;ADCY3;DMD;DAG1;ADCY9;CACNB2;SLC8A1;ADCY2;TPM1;CACNG8;ITGA3;CACNG7;ADCY5;SLC8A3	LAMP5RELN
90	WikiPathway_2023_Human__Mitochondrial Complex III Assembly WP4921	-0.618911	-2.44014	0	0.00131316	0.092	9/15	11.12%	UQCRFS1;UQCRQ;UQCC3;CYC1;UQCR11;UQCR10;BCS1L;UQCRB;UQCRH	LAMP5RELN
91	GO_Biological_Process_2023__Positive Regulation Of Tumor Necrosis Factor Production (GO:0032760)	0.373657	2.4175	0	0.0155399	0.191	16/44	9.17%	TLR1;SYK;PLCG2;TLR2;HLA-E;OAS2;IL33;OAS3;CYBA;OAS1;IFIH1;RIGI;HSPB1;LCP1;LY96;AMH	LAMP5RELN
92	GO_Cellular_Component_2023__Precatalytic Spliceosome (GO:0071011)	-0.3786	-2.39921	0	0.00191394	0.139	45/51	52.26%	RNF113A;LSM2;LSM7;LSM3;SF3B4;SF3B5;SNRPD2;SNRPB;LSM4;IK;SNU13;SF3B6;DHX16;SNRPE;ZMAT2;RBMX2;PHF5A;SF3B2;SNRPG;LSM5;SNRPB2;SNIP1;SNRPD1;MFAP1;PRPF31;WBP4;PRPF4;SNRPD3;SNRPA1;MAGOHB;PRPF38A;SF3A1;EFTUD2;SNRNP200;TXNL4A;LSM6;PRPF38B;LSM8;SF3A3;PRPF6;CWC22;PRPF8;SF3B3;SF3B1;SMU1	LAMP5RELN
93	KEGG_2021_Human__Hypertrophic cardiomyopathy	0.304288	2.39674	0	0.0163136	0.212	42/70	30.59%	ITGB4;ITGA8;ITGA5;CACNA2D4;CACNG6;LAMA2;ATP2A3;AGT;ITGA1;TPM2;CACNG1;EDN1;ITGA2B;CACNG4;CACNG5;ITGA10;ITGA9;ATP2A1;TGFB1;CACNA2D3;CACNA2D1;CACNA2D2;ITGA6;CACNA1C;ITGB5;SLC8A2;TGFB3;SGCD;RYR2;LMNA;PRKAB2;CACNG2;CACNG3;DMD;DAG1;CACNB2;SLC8A1;PRKAG2;TPM1;CACNG8;ITGA3;CACNG7	LAMP5RELN
94	GO_Biological_Process_2023__Protein Targeting To Mitochondrion (GO:0006626)	-0.372466	-2.39174	0	0.00198054	0.145	47/55	51.12%	MTX1;NDUFA13;TIMM17B;TIMM13;TOMM22;TSPO;ROMO1;TIMM8B;TIMM10;AIP;TIMM8A;PAM16;TOMM7;TIMM17A;HSP90AA1;TIMM21;TOMM40L;FIS1;TOMM40;BCAP31;PMPCA;TOMM20;DNAJC19;TIMM44;TIMM50;TIMM10B;TIMM29;TOMM34;TIMM22;GRPEL2;GRPEL1;TRMT10B;MTCH1;AIFM1;HSPD1;FBXO7;SAMM50;MFF;TIMM9;DNAJC15;TIMM23;MFN2;HSPA4;IMMP1L;PMPCB;MTX2;TOMM70	LAMP5RELN
95	GO_Biological_Process_2023__ATP Biosynthetic Process (GO:0006754)	-0.494352	-2.38203	0	0.0021022	0.152	20/23	39.72%	ATP5MF;ATP5MC3;ATP5MC1;ATP5F1D;ATP5PO;ATP5PF;ATP5F1E;ATP5MJ;ATP5ME;ATP5PD;ATP5MK;ATP5F1B;ATP5PB;ATP5MG;ATP5F1A;ATP5MC2;ATP5F1C;VPS9D1;SLC25A13;NUDT2	LAMP5RELN
96	GO_Biological_Process_2023__One-Carbon Compound Transport (GO:0019755)	0.458613	2.37734	0	0.0183133	0.251	11/22	12.49%	SLC4A9;CA4;AQP8;HBB;SLC39A8;SLC14A2;SLC26A6;SLC14A1;SLC26A7;CFTR;SLC4A4	LAMP5RELN
97	GO_Molecular_Function_2023__Proton Transmembrane Transporter Activity (GO:0015078)	-0.424853	-2.37591	0	0.00216463	0.16	28/35	41.83%	MFSD3;COX4I1;COX8A;COX7A1;ATP6V1F;COX6B1;SLC18A2;COX5B;UQCR10;COX7C;SLC32A1;COX5A;COX7B;UQCRB;UQCRH;CTNS;UQCRC1;SLC47A1;SLC46A1;NOX5;CYB5A;DMAC2L;COX15;SLC25A13;SLC33A1;ATP6V1B2;COX7A2L;TMEM175	LAMP5RELN
98	GO_Cellular_Component_2023__Mitochondrial Intermembrane Space (GO:0005758)	-0.369253	-2.36307	0	0.00252439	0.184	36/55	38.01%	BLOC1S1;TIMM13;TRIAP1;CHCHD2;TIMM8B;TIMM10;PRELID1;CHCHD10;TIMM8A;HTRA2;NDUFB7;ARL2;STOML2;HAX1;NDUFA8;CYCS;DIABLO;COA4;CHCHD5;SOD1;COA6;ARL2BP;GATM;PRELID3B;COA7;REXO2;COX19;NME4;COX17;TIMM10B;TIMM29;UQCC2;PINK1;CPOX;AIFM1;THOP1	LAMP5RELN
99	MSigDB_Hallmark_2020__Unfolded Protein Response	-0.301008	-2.357	0	0.00264548	0.195	75/108	46.72%	NHP2;YIF1A;EXOSC5;IMP3;HSPA5;CHAC1;CKS1B;KDELR3;DNAJB9;BANF1;RRP9;DDIT4;TUBB2A;CEBPB;ATF3;SPCS1;RPS14;POP4;H2AX;EIF4A2;LSM1;EIF4A1;TATDN2;GEMIN4;CEBPG;HERPUD1;LSM4;CALR;ATP6V0D1;EEF2;SHC1;ATF4;PREB;XBP1;EIF4EBP1;DCTN1;EIF4A3;CXXC1;NOP14;WIPI1;DKC1;PSAT1;HSP90B1;SRPRA;ASNS;HYOU1;NOP56;FKBP14;TARS1;ARFGAP1;MTHFD2;EXOSC9;NOLC1;SLC7A5;IFIT1;SRPRB;EXOSC1;NPM1;PDIA6;YWHAZ;ZBTB17;EIF4G1;NFYA;NFYB;ALDH18…	LAMP5RELN
100	GO_Biological_Process_2023__Organic Anion Transport (GO:0015711)	0.311297	2.35486	0	0.0209206	0.289	25/65	13.20%	ABCG2;SLC4A9;CA4;SLC22A24;SLC22A9;ABCC4;SLC22A6;SLCO2A1;SLC17A9;ABCC6;SLC39A8;SLC22A25;SLCO2B1;SLC25A41;SLC26A6;SLCO4A1;SLCO1C1;SLCO5A1;SLC22A10;SLC26A7;CFTR;SLC25A19;SLC52A2;SLC4A4;LRRC8D	LAMP5RELN
101	KEGG_2021_Human__ECM-receptor interaction	0.303721	2.34916	0	0.0210898	0.3	24/64	12.24%	SDC4;ITGB4;COL1A1;ITGA8;COL9A1;ITGA5;CD44;HSPG2;FREM2;LAMA2;NPNT;ITGA1;TNC;LAMB4;TNXB;LAMC3;ITGA2B;VWF;LAMA3;GP6;ITGA10;AGRN;COL4A6;ITGA9	LAMP5RELN
102	WikiPathway_2023_Human__Splicing Factor NOVA Regulated Synaptic Proteins WP4148	0.370038	2.3302	0	0.022899	0.329	38/39	59.72%	EPB41;AGRN;KCNQ2;NTNG1;PLCB4;EPB41L2;NEO1;CADM1;CHL1;EPB41L1;PRKCZ;KCNJ6;MAPK4;EFNA5;EPB41L3;MAPK9;KCNMA1;CDH2;DAB1;CLASP1;GPHN;ANK3;CASK;GRIN2B;GABBR2;GRIK2;MAP4;CLSTN1;GABRG2;CAMK2G;CADM3;GRIN1;TERF2IP;ATP2B1;STX2;SNW1;RAP1GAP;APLP2	LAMP5RELN
103	GO_Cellular_Component_2023__U2-type Precatalytic Spliceosome (GO:0071005)	-0.374484	-2.32695	0.00160772	0.00358397	0.254	43/49	52.26%	RNF113A;LSM2;LSM7;LSM3;SF3B4;SF3B5;SNRPD2;SNRPB;LSM4;IK;SNU13;DHX16;SNRPE;ZMAT2;RBMX2;PHF5A;SF3B2;SNRPG;LSM5;SNRPB2;SNIP1;SNRPD1;MFAP1;PRPF31;WBP4;PRPF4;SNRPD3;SNRPA1;MAGOHB;PRPF38A;SF3A1;EFTUD2;SNRNP200;TXNL4A;LSM6;LSM8;SF3A3;PRPF6;CWC22;PRPF8;SF3B3;SF3B1;SMU1	LAMP5RELN
104	GO_Biological_Process_2023__Positive Regulation Of Tumor Necrosis Factor Superfamily Cytokine Production (GO:1903557)	0.347444	2.31155	0	0.0249604	0.364	16/46	9.17%	TLR1;SYK;PLCG2;TLR2;HLA-E;OAS2;IL33;OAS3;CYBA;OAS1;IFIH1;RIGI;HSPB1;LCP1;LY96;AMH	LAMP5RELN
105	WikiPathway_2023_Human__Wnt Beta Catenin Signaling Pathway In Leukemia WP3658	0.459522	2.31033	0.00236407	0.0243821	0.37	11/22	16.52%	RARA;LRP5;FLT3;CCND1;JUP;PML;AKT1;AXIN2;RUNX1T1;WIF1;TCF3	LAMP5RELN
106	GO_Cellular_Component_2023__Membrane Raft (GO:0045121)	0.242413	2.30853	0	0.0239845	0.374	38/126	12.78%	TLR1;ABCG2;PLCG2;NTSR1;GJA1;CD8A;TLR2;PLSCR1;TNFRSF11A;FYB2;ITGAM;ASAH2;EMP2;CBLC;CR1;ANGPT1;CLN3;RIT2;LAT2;SKAP1;AHNAK;TEX101;ADCY8;SULF1;RTN4RL2;FAS;KCNQ1;MYO1C;NFAM1;GP6;PSEN2;ARID3A;TEK;ORAI1;LCP2;RAP2B;EZR;CARD11	LAMP5RELN
107	GO_Biological_Process_2023__Protein Stabilization (GO:0050821)	-0.259996	-2.30213	0	0.00445664	0.305	107/178	42.84%	GLMP;RPS7;RASSF2;PFDN5;PARK7;GAPDH;PIM2;STUB1;SWSAP1;PHB1;GRN;HSPA1A;PDCL3;USP19;USP27X;BAG1;PFDN6;WNT10B;RPL11;RPL17;BAG6;TRIM39;CRYAB;PDRG1;TESC;CCT7;PIH1D1;CALR;PFN1;PFN2;PHB2;RPL5;VBP1;HSP90AB1;TAF9B;MUL1;TNIP2;PPIB;CCT5;HSP90AA1;DNAAF2;UXT;MSX1;MT3;CCT6A;PFDN2;TELO2;PPARGC1A;SAXO1;HSPA1B;SOX4;WIZ;RUVBL2;CCT2;POLR2E;CAMLG;PRKCD;GET1;FLOT1;PIN1;SYVN1;HIP1R;ATP1B1;TAF9;NOP53;DVL3;RUVBL1;WDR81;R…	LAMP5RELN
108	GO_Biological_Process_2023__Regulation Of Tumor Necrosis Factor Production (GO:0032680)	0.293114	2.29874	0	0.0249888	0.399	22/73	9.17%	TLR1;ZFP36;SYK;PLCG2;RARA;TLR2;HLA-E;OAS2;IL33;OAS3;VSIR;CYBA;OAS1;PTPN6;IFIH1;NR1H4;RIGI;HSPB1;PTPN22;LCP1;LY96;AMH	LAMP5RELN
109	GO_Biological_Process_2023__Glycolytic Process (GO:0006096)	-0.4949	-2.29874	0	0.00447602	0.309	15/21	26.26%	PGAM2;TPI1;GAPDH;GCK;LDHA;ENO1;ALDOC;PGAM1;PGK1;ENO2;PFKFB2;PFKL;PKM;ENO4;PFKFB1	LAMP5RELN
110	GO_Molecular_Function_2023__Voltage-Gated Monoatomic Cation Channel Activity (GO:0022843)	0.294581	2.29824	0	0.0241271	0.399	38/66	30.59%	TMC1;CACNA2D4;CACNG6;KCNH4;TMC2;HCN4;HCN3;KCNQ1;KCNA4;CACNG4;CACNG5;RYR1;KCNA6;KCNH3;KCNG2;KCNC4;KCNH2;CACNA2D3;KCNH5;LRRC55;CACNA2D1;TPCN2;CACNA2D2;KCNC3;CACNA1C;KCNQ4;KCNQ5;CACNA1I;KCNQ2;CACNG2;KCNA2;CACNG3;CACNA1E;CACNB2;KCNQ3;CACNA1B;CACNG8;CACNG7	LAMP5RELN
111	GO_Biological_Process_2023__Response To Fibroblast Growth Factor (GO:0071774)	0.533114	2.29193	0	0.0247702	0.415	7/15	3.27%	ZFP36;NDNF;ZFP36L1;ZFP36L2;EGR3;CD44;HYAL1	LAMP5RELN
112	MSigDB_Hallmark_2020__Epithelial Mesenchymal Transition	0.227169	2.29121	0	0.0239712	0.415	47/147	13.63%	GJA1;SDC4;GADD45B;FBLN1;COL1A1;COL12A1;INHBA;ITGA5;FZD8;CD44;DCN;JUN;OXTR;LAMA2;PLOD2;ELN;COL5A1;IGFBP4;FBLN5;TNC;PDGFRB;COL11A1;TPM2;SNTB1;FBLN2;PRRX1;SLIT3;ACTA2;LOXL2;CTHRC1;FAS;GEM;VEGFA;LAMA3;BMP1;PLOD1;COL5A2;SLIT2;TAGLN;PTHLH;VIM;FSTL1;ABI3BP;FLNA;PLOD3;TGFB1;COL7A1	LAMP5RELN
113	GO_Cellular_Component_2023__U2-type Spliceosomal Complex (GO:0005684)	-0.302479	-2.29065	0	0.00481748	0.324	64/88	48.09%	RNF113A;LSM2;LSM7;LSM3;SF3B4;SF3B5;SNRPD2;BUD31;SNRPB;LSM4;IK;SNU13;BCAS2;SF3B6;ISY1;DHX16;SNRPE;EIF4A3;ZMAT2;YJU2;CWC15;RBMX2;PHF5A;RBM8A;RBM22;SYF2;XAB2;HTATSF1;SF3B2;SNRPG;CCDC12;LSM5;BUD13;SNRPB2;SNIP1;CRNKL1;SNRPD1;PPIL1;TFIP11;MFAP1;PRPF31;WBP4;PRPF4;SNRPD3;SNRPA1;MAGOHB;PRPF38A;PPIE;SF3A1;YJU2B;EFTUD2;SNRNP200;CDC5L;SNW1;PLRG1;TXNL4A;LSM6;LSM8;SF3A3;CDC40;SNRPN;PRPF6;CWC22;GCFC2	LAMP5RELN
114	GO_Biological_Process_2023__Positive Regulation Of Vasculature Development (GO:1904018)	0.293261	2.28692	0	0.0238811	0.419	28/63	19.13%	SMOC2;RRAS;HK2;EMILIN2;NINJ1;RAPGEF3;FLT1;EMP2;HYAL1;PRKD2;RUNX1;GAB1;HSPB1;FGF18;VEGFA;ZNF304;JUP;TEK;ETS1;VASH2;CTSH;FGF2;CHRNA7;PDCD6;BRCA1;PAK4;PRKD1;PIK3CD	LAMP5RELN
115	KEGG_2021_Human__Spliceosome	-0.275239	-2.27411	0	0.00552092	0.363	106/129	56.80%	HSPA8;LSM2;HSPA1A;LSM7;LSM3;U2AF1L4;SF3B4;SF3B5;SNRPD2;RP9;BUD31;PUF60;HSPA1L;SNRPB;LSM4;PQBP1;SNU13;BCAS2;SF3B6;ISY1;HNRNPA1;DHX16;PCBP1;SNRPE;EIF4A3;ZMAT2;RBMXL1;CWC15;HSPA1B;SNRPC;HSPA2;DHX38;SRSF8;SNRPA;PHF5A;RBM8A;RBM22;SYF2;XAB2;SF3B2;SNRPG;CHERP;CCDC12;LSM5;HNRNPK;SNRPB2;SRSF2;CRNKL1;MAGOH;PPIH;SNRPD1;PPIL1;NCBP2;PRPF31;SLU7;PRPF4;SNRPD3;SNRPA1;MAGOHB;PRPF38A;SRSF9;PPIE;SMNDC1;SF3A1;SRSF7;…	LAMP5RELN
116	GO_Cellular_Component_2023__Postsynaptic Density Membrane (GO:0098839)	0.36934	2.27388	0	0.0256386	0.449	32/33	58.09%	GRIK3;CACNG4;CACNG5;GRM1;GRIN2D;GRID2;DLG4;DAGLA;PTPRS;CACNG2;CACNG3;GRIK4;GRIA1;CACNG8;CACNG7;GRIK1;GRIA3;DLG2;GRID1;GRIA2;GRIN2B;GRIN2A;PLPPR4;DLG3;GRIA4;GRM5;GRIK2;GRIN3A;NETO1;GRIK5;DLG1;SYNDIG1	LAMP5RELN
117	GO_Biological_Process_2023__Gluconeogenesis (GO:0006094)	-0.461624	-2.27297	0	0.00549661	0.366	16/25	26.26%	KRT17;PGAM2;TPI1;ENO1;SLC37A4;PGAM1;MDH2;PGK1;ENO2;POLR2D;PPARGC1A;MDH1;G6PC3;SLC25A1;CRTC2;PFKFB1	LAMP5RELN
118	GO_Cellular_Component_2023__Brush Border Membrane (GO:0031526)	0.424903	2.27091	0	0.0256143	0.456	13/25	15.15%	CA4;AQP8;ATP6V0A4;SLC28A2;SLC26A6;SLC26A4;CUBN;PLB1;SLC7A9;B4GALT1;PEX19;SLC22A5;CYBRD1	LAMP5RELN
119	WikiPathway_2023_Human__Kallmann Syndrome WP5074	-0.524781	-2.26956	0	0.00563353	0.377	10/19	15.68%	OLIG2;ASCL1;TMEM98;CHD7;GNRH1;SEMA3E;PLXND1;MYRF;PROK2;SOX10	LAMP5RELN
120	GO_Biological_Process_2023__Pyruvate Metabolic Process (GO:0006090)	-0.402865	-2.26055	0	0.00605518	0.396	21/36	26.26%	KRT17;PGAM2;LDHB;TPI1;NR4A3;GAPDH;GCK;LDHA;ENO1;ALDOC;PGAM1;PGK1;ENO2;PDHB;VDAC1;PFKFB2;PFKL;PKM;PDHA1;ENO4;PFKFB1	LAMP5RELN
121	GO_Biological_Process_2023__Regulation Of Proteolysis (GO:0030162)	-0.391461	-2.25215	0	0.00641818	0.42	21/39	25.96%	NEDD8;CDK5;AURKAIP1;FADD;CSTB;STUB1;BAG6;PARL;PLAUR;PLAT;CST3;CAPN3;FGFR4;BAD;CASP8;RNF139;TBC1D10A;CLN6;HDAC6;TRIM32;SERPINE2	LAMP5RELN
122	GO_Molecular_Function_2023__Hormone Activity (GO:0005179)	-0.453225	-2.2486	0	0.00651102	0.43	15/27	16.09%	CRH;POMC;SST;CORT;VGF;NPY;CCK;GNRH1;PNOC;CALCB;UCN;INSL6;VIP;CHGB;NPPC	LAMP5RELN
123	WikiPathway_2023_Human__Selenium Micronutrient Network WP15	-0.361651	-2.24607	0	0.00662099	0.436	20/49	13.15%	SELENOW;PRDX2;SELENOM;GPX4;ALB;KMO;PRDX5;SELENOS;CAT;MSRB1;FLAD1;SELENOK;PNPO;PRDX1;PRDX4;DIO1;SEPHS2;SELENOP;PLAT;RFK	LAMP5RELN
124	GO_Biological_Process_2023__Response To Zinc Ion (GO:0010043)	0.484017	2.24032	0	0.0313689	0.538	10/18	12.69%	MT1X;MT1G;SLC30A8;MT1E;MT1M;GLRA1;SLC30A3;GLRA2;MT2A;HAAO	LAMP5RELN
125	GO_Biological_Process_2023__Regulation Of Endothelial Cell Migration (GO:0010594)	0.277364	2.23371	0	0.0324962	0.564	28/69	20.13%	PIK3CG;ATOH8;SMOC2;RRAS;DCN;EMP2;RHOJ;AGT;ANGPT1;PRKD2;EGF;SP100;EDN1;VEGFA;SLIT2;NELL1;PTK2B;TEK;ETS1;ADGRB1;AKT1;FGF2;PDCD6;PLPP3;BCAR1;PRKD1;PIK3CD;DAB2IP	LAMP5RELN
126	WikiPathway_2023_Human__GPCRs Class A Rhodopsin Like WP455	-0.290772	-2.22018	0.00146199	0.00817106	0.509	53/97	28.24%	GPR37;AVPR1A;GPR68;HCRTR1;CX3CR1;FPR3;GPR37L1;NMUR1;ADRA1D;SSTR1;NTSR2;GPR21;HTR1F;NPFFR2;ADRB3;GPR34;NMBR;GPR171;GPR3;MCHR1;ADORA2B;OR6A2;MTNR1A;HCRTR2;TBXA2R;OPRL1;GPR87;F2R;ACKR4;CCKBR;OPRM1;HTR2B;ADRB1;LPAR6;CHML;HTR2A;NPBWR1;SSTR4;DRD1;NPY5R;GRPR;HTR2C;CCR10;ADORA1;PRLHR;P2RY11;CHRM1;GPR22;OPN3;GPR173;P2RY14;GPR27;HRH3	LAMP5RELN
127	KEGG_2021_Human__Retrograde endocannabinoid signaling	-0.278272	-2.21038	0	0.00872056	0.54	37/123	14.06%	NDUFB11;NDUFB8;NDUFA13;NDUFB3;NDUFA11;NDUFA7;NDUFB10;NDUFC2;NDUFA4;NDUFS5;NDUFA1;PRKCG;GNG3;NDUFV1;NDUFB7;NDUFB4;SLC32A1;NDUFA2;GABRD;NDUFA4L2;SLC17A7;GABRG1;NDUFB9;NDUFA8;ITPR2;NDUFC1;NDUFS7;NDUFB2;NDUFS3;NDUFS6;PLCB2;NDUFA6;NDUFS2;NDUFAB1;NDUFA3;NDUFA12;SLC17A8	LAMP5RELN
128	KEGG_2021_Human__Neuroactive ligand-receptor interaction	-0.250623	-2.2063	0	0.00895181	0.552	55/176	13.89%	CRH;POMC;SST;CORT;CHRNB1;TAC1;VIPR2;AVPR1A;CALCR;NPY;LPAR1;HCRTR1;TSPO;CCK;FPR3;GNRHR;NMUR1;ADM;GNRH1;ADRA1D;SSTR1;C3;NPB;NTSR2;HTR1F;NPFFR2;ADRB3;GRM8;NMBR;S1PR1;MCHR1;GPR156;PRSS3;ADORA2B;CALCB;MTNR1A;HCRTR2;TSHR;TBXA2R;GRIN2C;GABRD;TAC4;OPRL1;GABRG1;UCN;GLRA3;P2RX5;RXFP1;F2R;TACR3;VIP;TAC3;CCKBR;MCHR2;OPRM1	LAMP5RELN
129	GO_Cellular_Component_2023__Organelle Envelope Lumen (GO:0031970)	-0.332542	-2.19241	0	0.0100326	0.592	39/61	39.95%	BLOC1S1;TIMM13;TRIAP1;CHCHD2;TIMM8B;TIMM10;PRELID1;CHCHD10;TIMM8A;TUBB2A;HTRA2;NDUFB7;ARL2;STOML2;HAX1;NDUFA8;CYCS;DIABLO;COA4;CHCHD5;SOD1;COA6;ARL2BP;GATM;PRELID3B;COA7;REXO2;COX19;NME4;COX17;TIMM10B;TIMM29;UQCC2;PINK1;CPOX;AIFM1;THOP1;PLAAT1;SDHAF3	LAMP5RELN
130	GO_Biological_Process_2023__Carbohydrate Catabolic Process (GO:0016052)	-0.419824	-2.19153	0.0016129	0.00999967	0.596	18/29	26.26%	PGAM2;TPI1;GAPDH;GCK;LDHA;ENO1;ALDOC;PGAM1;PGK1;NEU1;ENO2;NAGA;ENOSF1;PFKFB2;PFKL;PKM;ENO4;PFKFB1	LAMP5RELN
131	GO_Biological_Process_2023__Mitochondrial Cytochrome C Oxidase Assembly (GO:0033617)	-0.477769	-2.18751	0	0.0102643	0.61	14/20	29.64%	PET117;SCO2;COX14;COA3;SURF1;PET100;COX16;TIMM21;COX20;TMEM223;SMIM20;COX19;COX17;COA8	LAMP5RELN
132	GO_Biological_Process_2023__Negative Regulation Of Viral Genome Replication (GO:0045071)	0.378729	2.18682	0.00265252	0.0439902	0.687	25/32	39.87%	PLSCR1;FAM111A;OAS2;OAS3;IFITM3;OAS1;IFIH1;RNASEL;MX1;INPP5K;TNIP1;RSAD2;ZC3HAV1;MAVS;MORC2;SETDB1;ZNFX1;RESF1;ILF3;MPHOSPH8;EIF2AK2;SRPK1;PROX1;TASOR;N4BP1	LAMP5RELN
133	GO_Biological_Process_2023__Negative Regulation Of Type II Interferon Production (GO:0032689)	0.503095	2.18179	0	0.0443017	0.704	10/15	20.31%	RARA;INHBA;VSIR;CD274;CR1;NR1H4;TNFSF4;INHA;GAS6;HAVCR2	LAMP5RELN
134	WikiPathway_2023_Human__Nuclear Receptors In Lipid Metabolism And Toxicity WP299	0.49211	2.18116	0	0.0434202	0.706	12/16	27.03%	RARA;ABCC2;NR1H4;RARG;CYP2E1;NR1H3;RARB;PPARA;ABCA1;ABCG1;PPARD;PPARG	LAMP5RELN
135	GO_Cellular_Component_2023__Calcium Channel Complex (GO:0034704)	0.310675	2.17212	0	0.045126	0.725	29/51	30.59%	CACNA2D4;CACHD1;CACNG6;SCN9A;SCN7A;TRPC4;RYR1;STAC3;RYR3;CACNA1G;ORAI1;ATP2A1;SCN11A;CACNA2D3;CACNA2D1;CACNA2D2;CACNA1C;TRPC5;CACNA1I;RYR2;CACNG3;MCUB;CACNA1E;PDE4D;CACNB2;PKD1L1;CACNA1B;CACNG8;CACNG7	LAMP5RELN
136	GO_Biological_Process_2023__Response To cAMP (GO:0051591)	0.356016	2.16473	0	0.0465973	0.751	12/31	12.76%	ZFP36L1;AQP8;RAPGEF3;HCN4;SLC26A6;HCN3;KCNQ1;CFTR;SLC26A3;INPP5K;EZR;PDE2A	LAMP5RELN
137	GO_Biological_Process_2023__Pattern Recognition Receptor Signaling Pathway (GO:0002221)	0.355025	2.15847	0.0027248	0.047969	0.769	12/34	7.89%	TLR1;ALPK1;PLCG2;TLR2;COLEC11;NLRP1;NOD1;IFIH1;RIGI;DHX58;IRAK1;LY96	LAMP5RELN
138	KEGG_2021_Human__Systemic lupus erythematosus	-0.372825	-2.15703	0	0.0131856	0.702	16/38	14.01%	H2BC4;CD86;H2BC21;H2AC8;H4C8;C3;H4C5;H2BC18;H2AZ1;H2AX;H2BC15;H2AC20;SNRPB;H2BC6;H4C3;H2AJ	LAMP5RELN
139	MSigDB_Hallmark_2020__DNA Repair	-0.261954	-2.15482	0	0.0133595	0.704	95/139	46.58%	APRT;MPG;NME1;NT5C;MRPL40;GPX4;GUK1;PDE4B;ADRM1;VPS28;SURF1;EDF1;POLR2K;POLR2G;SNAPC5;RPA3;POLR2I;POLR3GL;BRF2;SAC3D1;POLR2C;TARBP2;POLR2J;FEN1;NME3;GTF2A2;TAF6;ADA;NUDT21;GMPR2;TP53;CETN2;EIF1B;RFC4;MPC2;POLR2D;TAF10;CMPK2;NELFE;CANT1;TAF13;BCAP31;POLE4;AAAS;SSRP1;POLR2E;TMED2;ARL6IP1;ITPA;NME4;SNAPC4;RFC5;DAD1;PCNA;TAF9;COX17;GTF2F1;TAF1C;NELFB;ADCY6;NCBP2;GTF3C5;SDCBP;POLR2H;PRIM1;ERCC2;UPF3B;…	LAMP5RELN
140	GO_Molecular_Function_2023__Translation Initiation Factor Activity (GO:0003743)	-0.375473	-2.14899	0	0.0139835	0.723	35/40	52.60%	EIF1;EIF4A2;COPS5;EIF6;EIF4A1;EIF3G;EIF3I;EIF1AY;EIF1B;EIF2B5;EIF2B2;EIF3D;EIF4G2;EIF3C;EIF1AX;EIF2B4;EIF2S2;EIF2B1;EIF3K;EIF3F;MTIF2;EIF2S3;EIF5;EIF4G1;MTIF3;EIF4E3;EIF3M;EIF2S1;EIF3B;EIF3E;EIF3J;EIF4E2;EIF3H;EIF5B;EIF4E	LAMP5RELN
141	GO_Biological_Process_2023__Hexose Biosynthetic Process (GO:0019319)	-0.419236	-2.14785	0.0033389	0.0139818	0.728	17/28	26.26%	KRT17;PGAM2;TPI1;ENO1;SLC37A4;PGAM1;MDH2;PGK1;ENO2;ATF4;POLR2D;PPARGC1A;MDH1;G6PC3;SLC25A1;CRTC2;PFKFB1	LAMP5RELN
142	GO_Biological_Process_2023__Positive Regulation Of Response To External Stimulus (GO:0032103)	0.254854	2.14434	0	0.0514695	0.802	33/85	18.07%	SERPINF2;CASP4;TLR2;PLSCR1;EMILIN2;NINJ1;IL33;NLRP1;CYBA;AGT;PDGFRB;PLG;RNF31;LCP1;ZP3;LY96;MYO1C;MAPK13;TNFSF4;F2RL1;NFKBIZ;SCARF1;USF1;ETS1;TNIP1;PDE2A;P2RY12;TGFB1;NAIP;IL16;PPM1F;IL17RA;AIM2	LAMP5RELN
143	GO_Biological_Process_2023__Protein Exit From Endoplasmic Reticulum (GO:0032527)	-0.449517	-2.14384	0	0.0143222	0.737	21/23	49.11%	RANGRF;SELENOS;HERPUD1;PREB;TMEM129;TMED9;SEC61B;UFD1;HSP90B1;SYVN1;SURF4;ERLEC1;DERL2;DERL1;SEC13;VCP;SEC16A;LMAN1;OS9;TECPR2;SEL1L	LAMP5RELN
144	WikiPathway_2023_Human__Prostaglandin Synthesis And Regulation WP98	0.372252	2.14378	0	0.0504126	0.802	15/30	15.86%	PTGFR;PTGER3;PTGFRN;ABCC4;TBXAS1;PLA2G4A;HPGD;EDN1;HPGDS;SCGB1A1;EDNRA;AKR1C3;ANXA5;AKR1C1;EDNRB	LAMP5RELN
145	GO_Biological_Process_2023__Respiratory Chain Complex IV Assembly (GO:0008535)	-0.448056	-2.13905	0.00165837	0.0148761	0.752	20/24	43.35%	PET117;SCO2;COX14;COA3;SURF1;PET100;COX16;COA6;TIMM21;COX20;TMEM223;SMIM20;COX19;COX17;COA8;COA5;COX15;COX10;COX18;SCO1	LAMP5RELN
146	GO_Biological_Process_2023__Ribosomal Large Subunit Assembly (GO:0000027)	-0.498961	-2.13752	0.00346021	0.0149496	0.758	12/17	28.73%	RPL10;RRS1;RPL6;RPLP0;RPL11;PPAN;RPL23A;RPL5;TRAF7;BRIX1;MRPL20;NOP53	LAMP5RELN
147	KEGG_2021_Human__Glutathione metabolism	-0.379968	-2.13555	0	0.015055	0.764	32/38	47.78%	GPX4;CHAC2;GGT5;CHAC1;OPLAH;GGCT;GSTP1;GSTO1;SRM;G6PD;RRM2;GSTM4;PRDX6;GSTK1;MGST1;ODC1;GSS;GSTM3;GPX7;LAP3;RRM1;TXNDC12;MGST2;RRM2B;MGST3;IDH2;GCLC;GGT7;GSTO2;PGD;SMS;GCLM	LAMP5RELN
148	WikiPathway_2023_Human__Oligodendrocyte Specification And Differentiation Leading To Myelin Components For CNS WP4304	-0.47228	-2.13303	0	0.0151584	0.769	12/21	16.83%	OLIG2;BMP2;OLIG1;ASCL1;NKX2-2;MOG;PDGFB;MAG;SOX9;PLP1;SOX10;SOX6	LAMP5RELN
149	MSigDB_Hallmark_2020__Reactive Oxygen Species Pathway	-0.360391	-2.13184	0	0.0152191	0.775	29/42	39.68%	PRDX2;GPX4;SELENOS;CAT;NDUFB4;PRDX1;FTL;PRDX4;IPCEF1;LAMTOR5;NDUFA6;NDUFS2;G6PD;SOD1;JUNB;PRDX6;MGST1;CDKN2D;NQO1;GLRX;TXN;ATOX1;PTPA;GLRX2;ERCC2;TXNRD2;STK25;HMOX2;SOD2	LAMP5RELN
150	GO_Molecular_Function_2023__Neuropeptide Receptor Activity (GO:0008188)	-0.451633	-2.13178	0	0.015093	0.775	18/23	32.63%	GPR37;NMUR1;SSTR1;NTSR2;NMBR;GPR171;MCHR1;HCRTR2;TACR3;OPRM1;SSTR4;SORCS1;NPY5R;GRPR;PRLHR;SORCS2;NPY1R;SSTR2	LAMP5RELN
151	GO_Biological_Process_2023__Activation Of Phospholipase C Activity (GO:0007202)	-0.492226	-2.13008	0	0.0151931	0.783	10/17	16.36%	AVPR1A;CD86;LPAR1;NMUR1;PHB1;TXK;PLCB2;PHB2;HTR2B;HTR2A	LAMP5RELN
152	GO_Biological_Process_2023__Macrophage Activation (GO:0042116)	0.419598	2.12806	0.0023753	0.0540065	0.829	9/22	8.84%	TLR1;SYK;PLCG2;ITGAM;CD93;SLC11A1;MYO1C;C5AR1;SBNO2	LAMP5RELN
153	GO_Cellular_Component_2023__Cell Projection Membrane (GO:0031253)	0.265523	2.12794	0	0.0528594	0.829	44/77	33.24%	ABCG2;DRD2;CA4;FSCN3;DRD5;GPR157;EVC;AQP8;ATP6V0A4;SLC28A2;BBS1;SLC26A6;SLC26A4;CUBN;PLB1;PODXL;SLC7A9;B4GALT1;PEX19;SLC22A5;BBS5;CYBRD1;GPR161;RAB35;TMEM231;SLC6A6;SHANK3;PTCH1;LIMA1;SYNE2;ADCY3;ANTXR1;TCTN2;DMD;GNA13;BBS2;EFCAB7;ITGA3;SLC11A2;GNA12;TTC8;ARL13B;BBS4;BBS7	LAMP5RELN
154	GO_Molecular_Function_2023__RNA Endonuclease Activity, Producing 5'-Phosphomonoesters (GO:0016891)	-0.425366	-2.12073	0	0.0161471	0.803	20/27	36.84%	POP7;RPP21;RPP25;POP4;NUDT16L1;FEN1;POP5;RPP40;MRPL44;DBR1;PLD6;RNASEH1;APEX1;PRORP;NUDT12;ENDOV;POP1;NUDT16;ELAC2;RPP38	LAMP5RELN
155	GO_Molecular_Function_2023__Receptor Ligand Activity (GO:0048018)	-0.252903	-2.12003	0	0.0160788	0.804	51/140	17.56%	CRH;POMC;SST;VGF;CD86;BMP2;IL18;CCK;DPP4;GNRH1;NDP;TNFSF12;CLEC11A;BDNF;SEMA3B;TAFA4;IL5;SEMA3C;CRLF1;GRN;HSPA1A;WNT7B;LEFTY1;TIMP1;SEMA3E;TNFSF11;PDGFB;WNT10B;FGF22;VEGFB;DLL1;ALKAL1;GDF10;INSL6;MDK;GREM1;PGLYRP1;VIP;FGF1;OSGIN1;THPO;NBL1;CHGB;IL12A;IL7;SEMA7A;NPPC;SEMA5A;PDGFA;CX3CL1;FGF7	LAMP5RELN
156	GO_Cellular_Component_2023__Golgi Lumen (GO:0005796)	0.301924	2.11669	0	0.0554037	0.844	21/48	18.36%	RHBDF2;SDC4;GPC2;GPC5;DCN;WNT4;HSPG2;PCSK5;MUC6;MUC4;SDC3;F8;MUC20;AGRN;WNT3;TGFB1;NCAN;WNT5B;NGF;GAS6;PROS1	LAMP5RELN
157	GO_Biological_Process_2023__Positive Regulation Of Interleukin-6 Production (GO:0032755)	0.330413	2.1124	0	0.0561361	0.847	14/40	9.60%	TLR1;SYK;PLCG2;TLR2;NOS2;IL33;CYBA;POU2AF1;IFIH1;RIGI;LCP1;MAPK13;TNFSF4;F2RL1	LAMP5RELN
158	GO_Biological_Process_2023__Regulation Of Cell-Cell Adhesion Mediated By Cadherin (GO:2000047)	0.493043	2.11085	0	0.05575	0.849	7/15	8.75%	SERPINF2;NOTCH4;NOTCH1;PTPRU;PLG;EPCAM;VEGFA	LAMP5RELN
159	GO_Biological_Process_2023__Protein Import Into Mitochondrial Matrix (GO:0030150)	-0.501463	-2.10638	0	0.017739	0.838	13/16	35.52%	TIMM17B;ROMO1;PAM16;TIMM17A;TIMM21;TOMM40L;TOMM40;TOMM20;DNAJC19;TIMM44;TIMM50;GRPEL2;GRPEL1	LAMP5RELN
160	KEGG_2021_Human__Ribosome biogenesis in eukaryotes	-0.304887	-2.10371	0	0.0180355	0.843	46/71	42.50%	POP7;NHP2;EMG1;NOP10;IMP3;RPP25L;RPP25;NXT1;POP4;RAN;EIF6;CSNK2B;NOL6;POP5;IMP4;RPP40;FBLL1;SNU13;REXO1;GAR1;REXO5;RRP7A;NOB1;NXF1;REXO2;DKC1;FBL;NOP56;AK6;UTP15;GNL3;FCF1;POP1;RIOK1;SBDS;WDR3;RIOK2;WDR36;LSG1;RPP38;TCOF1;GNL2;HEATR1;MPHOSPH10;UTP14A;GTPBP4	LAMP5RELN
161	GO_Biological_Process_2023__Positive Regulation Of Signal Transduction By P53 Class Mediator (GO:1901798)	-0.478123	-2.10304	0	0.0179523	0.846	12/19	26.14%	EEF1E1;RPS7;MYC;UBB;RPS15;EIF5A;RPL17;MSX1;RPS20;CDK5RAP3;GET1;HEXIM1	LAMP5RELN
162	GO_Cellular_Component_2023__Postsynaptic Specialization Membrane (GO:0099634)	0.321712	2.09972	0.0025641	0.0594485	0.871	35/37	60.30%	GRIK3;CACNG4;CACNG5;GRM1;GRIN2D;GRID2;DLG4;DAGLA;PTPRS;NLGN1;CACNG2;CACNG3;GRIK4;GRIA1;CACNG8;CACNG7;GRIK1;GRIA3;DLG2;GRID1;GRIA2;GRIN2B;GRIN2A;PLPPR4;DLG3;GRIA4;GRM5;GRIK2;GRIN3A;NETO1;GRIK5;DLG1;LRRTM2;SYNDIG1;SLITRK3	LAMP5RELN
163	GO_Cellular_Component_2023__Basement Membrane (GO:0005604)	0.323085	2.09853	0	0.058745	0.874	19/38	23.28%	PXDN;SMOC2;HSPG2;LAMA2;TNC;LOXL2;NID1;SMOC1;LAMA3;FREM3;COL23A1;AGRN;COL4A6;LAMA5;USH2A;LAMB1;COL4A3;THBS4;P3H2	LAMP5RELN
164	KEGG_2021_Human__Hematopoietic cell lineage	0.34532	2.09842	0.0026178	0.057663	0.874	15/35	11.81%	CD5;CD8A;ITGAM;IL4R;ITGA5;CD44;FLT3;CR1;CSF1R;CD38;ITGA1;IL5RA;ITGA2B;CSF1;HLA-DMA	LAMP5RELN
165	GO_Biological_Process_2023__Positive Regulation Of Biosynthetic Process (GO:0009891)	0.34633	2.09842	0.008	0.056575	0.874	13/32	16.03%	SERPINF2;PLCG2;SCX;WNT4;MLXIPL;CYBA;RUNX1;SIRT4;VIM;AKT1;TGFB1;NR1H3;PPARA	LAMP5RELN
166	GO_Cellular_Component_2023__Motile Cilium (GO:0031514)	0.287661	2.0891	0.00268097	0.0590653	0.891	36/58	34.83%	RSPH9;HAVCR1;CFAP300;RSPH4A;DNAH11;DNAH5;ROPN1L;ENKUR;CFAP91;DNAH2;AK8;ODAD4;CATSPERG;CAMSAP3;CFAP251;DNAH9;IQUB;MNS1;SORD;RSPH1;CFAP61;DNAAF5;CABYR;NPHP1;IFT52;BBS2;CFAP70;CFAP161;IFT74;OFD1;ARL13B;TSGA10;BBS4;IFT88;WDR19;PKD2	LAMP5RELN
167	WikiPathway_2023_Human__Nsp1 From SARS CoV 2 Inhibits Translation Initiation In The Host Cell WP5027	-0.497864	-2.07675	0	0.0226811	0.924	16/16	50.28%	EIF1;EIF3G;EIF3I;EIF3D;EIF3C;EIF1AX;EIF2S2;EIF3F;EIF2S3;EIF5;EIF2S1;EIF3A;EIF3B;EIF3E;EIF3J;EIF3H	LAMP5RELN
168	GO_Biological_Process_2023__RNA Splicing, Via Transesterification Reactions With Bulged Adenosine As Nucleophile (GO:0000377)	-0.234857	-2.07544	0	0.0227317	0.927	135/173	56.80%	RNF113A;HSPA8;ESS2;LSM2;LSM7;LSM3;U2AF1L4;SF3B4;WDR83;SF3B5;SNRPD2;GEMIN7;BUD31;GPKOW;SNRPB;LSM4;GEMIN6;DDX41;RBM42;IK;SNU13;DBR1;BCAS2;SF3B6;ISY1;HNRNPA1;DHX16;SNRPE;EIF4A3;ZMAT2;CWC15;DHX38;SRSF8;SNRPA;RBMX2;PHF5A;RBM8A;PIN1;RBM22;SYF2;XAB2;HTATSF1;RBM4B;SF3B2;SNRPG;LSM5;BUD13;HNRNPK;SNRPB2;SNIP1;SRSF2;CRNKL1;MAGOH;METTL3;PPIH;SNRPD1;PPIL1;NCBP2;FRG1;TFIP11;MFAP1;PRPF31;PPIL3;SLU7;WBP4;PRPF4;SN…	LAMP5RELN
169	GO_Biological_Process_2023__Heme Biosynthetic Process (GO:0006783)	-0.495431	-2.07419	0.00172117	0.0227069	0.929	15/17	42.18%	ABCB6;TSPO;UROD;ATP5IF1;FXN;ALAS1;HMBS;PGRMC1;SLC25A38;ALAD;UROS;CPOX;COX15;COX10;NFE2L1	LAMP5RELN
170	WikiPathway_2023_Human__Proteasome Degradation WP183	-0.316542	-2.07357	0.0015625	0.022631	0.93	46/58	49.72%	PSMB8;PSME1;UBB;UCHL3;PSME2;PSMD8;H2AZ1;PSMC5;H2AX;PSMA7;PSMB6;HLA-B;PSMB10;PSMC4;PSMB5;UBC;PSMC3;PSME3;PSMB3;HLA-A;PSMD2;PSMD10;UCHL1;HLA-C;PSMB4;PSMD7;PSMD3;PSMC1;PSMA3;RPN1;PSMD4;PSMA4;PSMA5;RPN2;PSMC2;UBA1;PSMD13;PSMD6;PSMB2;PSMA1;PSMB1;UBE2D1;PSMB7;PSMD12;PSMD5;PSMC6	LAMP5RELN
171	KEGG_2021_Human__Staphylococcus aureus infection	0.428899	2.07084	0	0.0657732	0.918	11/19	14.58%	PTAFR;ICAM1;ITGAM;FPR1;C1R;PLG;C5AR1;C2;CFD;HLA-DMA;HLA-DPB1	LAMP5RELN
172	KEGG_2021_Human__Protein digestion and absorption	0.267882	2.06719	0	0.0661051	0.924	23/64	13.63%	COL1A1;SLC7A7;COL9A1;COL12A1;COL21A1;FXYD2;COL20A1;ELN;COL5A1;COL11A1;COL27A1;KCNN4;KCNQ1;COL14A1;COL5A2;COL23A1;COL11A2;SLC7A9;ATP1A2;COL4A6;COL24A1;COL19A1;COL7A1	LAMP5RELN
173	GO_Molecular_Function_2023__Neuropeptide Binding (GO:0042923)	-0.504176	-2.06356	0	0.0242542	0.945	13/16	32.63%	GPR37;NMUR1;SSTR1;GPR171;MCHR1;OPRL1;OPRM1;NPBWR1;SSTR4;NPY5R;PRLHR;NPY1R;SSTR2	LAMP5RELN
174	GO_Biological_Process_2023__Protein Insertion Into ER Membrane (GO:0045048)	-0.411272	-2.05863	0.00486224	0.025139	0.952	24/28	45.19%	EMC6;TMEM147;EMC7;NOMO2;RAB5IF;GET3;EMC9;EMC4;UBL4A;TRAM1L1;CAMLG;GET1;EMC10;NOMO3;MMGT1;SGTA;EMC3;NOMO1;NCLN;CCDC47;EMC8;EMC1;SEC61A1;EMC2	LAMP5RELN
175	GO_Molecular_Function_2023__Delayed Rectifier Potassium Channel Activity (GO:0005251)	0.419307	2.05793	0.00767263	0.0686888	0.939	11/20	19.76%	KCNE4;KCNE2;KCNG3;KCNQ1;KCNA4;KCNA6;KCNG2;KCNC4;KCNH2;KCNC3;KCNB2	LAMP5RELN
176	GO_Biological_Process_2023__Substantia Nigra Development (GO:0021762)	-0.373423	-2.05534	0	0.0256995	0.953	21/37	30.47%	COX6B1;HSPA5;PADI2;ATP5PF;S100A1;DYNLL1;NDUFS3;PLP1;G6PD;CALM2;NDRG2;YWHAH;ATP5PB;SYNGR3;CALM3;CHKB;CALM1;RHOA;CNP;YWHAQ;INA	LAMP5RELN
177	GO_Biological_Process_2023__Mitochondrial Transport (GO:0006839)	-0.322284	-2.05293	0.00157978	0.0259011	0.956	37/51	45.70%	TIMM17B;TIMM13;TOMM22;TSPO;SLC25A5;TIMM8B;TIMM10;AIP;BCS1L;PPIF;TOMM7;SLC25A4;TIMM17A;HSP90AA1;FIS1;TOMM40;BAD;OXA1L;BCAP31;TOMM20;DNAJC19;TIMM44;SLC25A24;BNIP3;TOMM34;PINK1;KIFBP;SLC25A13;STARD3;BCL2L1;FBXO7;COX18;MFF;TIMM9;VPS35;TIMM23;MFN2	LAMP5RELN
178	GO_Biological_Process_2023__mRNA Splicing, Via Spliceosome (GO:0000398)	-0.221534	-2.04116	0	0.0283362	0.965	154/203	56.80%	RNF113A;TSSC4;HSPA8;ESS2;LSM2;LSM7;LSM3;U2AF1L4;SF3B4;WDR83;SF3B5;GEMIN4;SNRPD2;GEMIN7;BUD31;PUF60;GPKOW;SCNM1;SNRPB;LSM4;GEMIN6;DDX41;RBM42;PQBP1;IK;SNU13;DBR1;BCAS2;SF3B6;ISY1;HNRNPA1;DHX16;PRMT5;SNRPE;EIF4A3;ZMAT2;CWC15;DHX38;SRSF8;SNRPA;RBMX2;PHF5A;RBM8A;PIN1;RBM22;SYF2;XAB2;HTATSF1;RBM4B;SF3B2;SNRPG;LSM5;SDE2;BUD13;HNRNPK;SNRPB2;WDR77;SNIP1;SRSF2;CRNKL1;MAGOH;METTL3;PPIH;SNRPD1;PPIL1;NCBP2;F…	LAMP5RELN
179	GO_Biological_Process_2023__Negative Regulation Of Actin Filament Polymerization (GO:0030837)	-0.459981	-2.04004	0.00176056	0.0283727	0.966	13/19	27.98%	TMSB10;TMSB4X;PFN1;PFN2;KANK1;MYADM;PFN4;TWF2;SSH3;GSN;TWF1;PRKCD;HIP1R	LAMP5RELN
180	MSigDB_Hallmark_2020__Protein Secretion	-0.268604	-2.02568	0	0.031856	0.977	80/91	61.77%	COPE;CD63;AP2M1;AP2S1;SOD1;SEC24D;SCAMP3;ERGIC3;TOM1L1;TMED2;ATP7A;TMX1;ANP32E;PPT1;SSPN;NAPA;BNIP3;RAB14;ARF1;CTSC;NAPG;CLTA;GLA;ARCN1;ATP1A1;VAMP3;RAB9A;STX16;CLN5;RER1;ZW10;TMED10;GNAS;M6PR;VPS4B;SNX2;LMAN1;SCAMP1;YIPF6;CLTC;COG2;COPB2;ARFGAP3;RAB22A;SNAP23;TPD52;SEC22B;GALC;RAB5A;LAMP2;STAM;OCRL;CLCN3;RAB2A;COPB1;STX12;AP1G1;AP3S1;SH3GL2;USO1;TSG101;DNM1L;SCRN1;SEC31A;ATP6V1H;AP2B1;RPS6KA3;MO…	LAMP5RELN
181	WikiPathway_2023_Human__Proximal Tubule Transport WP4917	0.328619	2.02565	0.00278552	0.0839315	0.959	11/38	4.11%	ABCG2;CA4;ATP6V0D2;SLC5A8;SLC7A7;ABCC4;SLC5A2;SLC22A6;FXYD2;ABCC2;ATP6V0A4	LAMP5RELN
182	GO_Molecular_Function_2023__Lipase Activity (GO:0016298)	0.350595	2.02495	0	0.0827192	0.959	20/30	35.56%	ABHD12B;ABHD1;CEL;PLA2G10;LIPC;PNPLA1;LCP1;PNPLA3;PNPLA5;FAAH;ABHD3;DAGLA;PITPNM3;ABHD5;PLBD2;SMPD3;ABHD12;LYPLA1;DDHD1;LDAH	LAMP5RELN
183	GO_Biological_Process_2023__U2-type Prespliceosome Assembly (GO:1903241)	-0.416155	-2.02414	0.0017301	0.0320088	0.979	17/23	37.91%	SF3B4;SF3B5;SNRPD2;SNRPB;SF3B6;SNRPE;RBMX2;PHF5A;HTATSF1;SF3B2;SNRPG;SNRPB2;SNIP1;SNRPD1;SNRPD3;SNRPA1;SF3A1	LAMP5RELN
184	GO_Cellular_Component_2023__Mitochondrial Matrix (GO:0005759)	-0.200069	-2.02305	0	0.0320426	0.979	202/324	48.30%	BLOC1S1;ETFB;KRT17;NUDT1;SCO2;NDUFB8;MRPL51;MRPL40;NDUFA7;HSPE1;FDX2;ALKBH7;HSD17B10;BCKDK;ATP5F1D;PRDX5;MRPL28;MRPL34;GADD45GIP1;MRPS12;ATP5F1E;MRPL14;PDK4;MTG1;ALDH4A1;SHMT2;MRM1;IDH3G;ACSM6;IDH3B;TWNK;C1QBP;PAM16;ARL2;MRPL57;SMDT1;ADHFE1;NUDT13;NDUFS7;CYP27A1;NDUFS3;MTRF1L;LIPT1;MRPL11;MRPL43;FDXR;MARS2;NDUFS2;SARS2;CASQ1;MDH2;MRPL9;NDUFAB1;ERAL1;ECI1;TST;MRPL49;AASS;MRPL58;ATP5F1B;CLPP;SOD1;G…	LAMP5RELN
185	GO_Biological_Process_2023__Positive Regulation Of Cytokine Production (GO:0001819)	0.194926	2.0226	0.004	0.0825398	0.96	45/188	10.22%	TLR1;SERPINF2;NOX1;SYK;PLCG2;PIK3CG;DRD2;CD58;RARA;TLR2;HLA-E;NOS2;CCDC88B;IL33;TRAF3IP3;MAPK11;CD274;CYBA;AGT;POU2AF1;CSF1R;PRKD2;HPSE;RUNX1;CCBE1;S100A13;NOD1;SLC11A1;IFIH1;NR1H4;RIGI;PTPN22;SULF1;DHX58;LCP1;ZP3;IRAK1;MAPK13;TNFSF4;AMH;AGPAT2;NFAM1;F2RL1;SULF2;IL12RB2	LAMP5RELN
186	GO_Biological_Process_2023__Integrin-Mediated Signaling Pathway (GO:0007229)	0.262042	2.02257	0.00334448	0.081207	0.96	27/68	19.62%	SYK;ITGB4;FBLN1;ITGA8;FYB2;ITGAM;CDH17;ITGA5;FYB1;HCK;ADAMTS1;ITGA1;PRAM1;ITGA2B;ADAM15;NELL1;ZNF304;PTK2B;ITGA10;ITGA9;LAMA5;MYH9;PLPP3;BCAR1;PRKD1;ADAMTS13;ITGA6	LAMP5RELN
187	WikiPathway_2023_Human__Microglia Pathogen Phagocytosis Pathway WP3937	0.371864	2.02195	0.002849	0.0802374	0.96	9/26	5.46%	SYK;PLCG2;PIK3CG;VAV1;ITGAM;LAT;HCK;CYBA;PTPN6	LAMP5RELN
188	GO_Biological_Process_2023__Positive Regulation Of Phosphatidylinositol 3-Kinase Activity (GO:0043552)	0.410358	2.0218	0.0078534	0.0790228	0.96	11/20	20.98%	EPHA8;FLT1;FLT3;PDGFRB;PTK2B;TEK;P2RY12;TGFB1;FGF2;PRKD1;IRS1	LAMP5RELN
189	GO_Biological_Process_2023__Cilium Movement (GO:0003341)	0.302747	2.02127	0.00271739	0.0780595	0.961	25/45	25.26%	RSPH9;TEKT5;TTC29;RSPH4A;DNAH11;TEKT3;DNAH5;ROPN1L;SPAG6;CFAP91;DNAH7;ODAD4;SPEF2;CCDC40;CFAP53;CAMSAP3;CFAP251;HYDIN;DNAI1;DNAH9;CFAP61;DNAAF5;CABYR;DNAH1;DNHD1	LAMP5RELN
190	GO_Molecular_Function_2023__Calcium Channel Activity (GO:0005262)	0.250194	2.01177	0	0.0820117	0.963	41/74	32.38%	TRPC6;TMC1;CACNA2D4;CACHD1;CACNG6;PKD1L3;TMC2;CACNG4;PKD1L2;CACNG5;TRPC4;RYR1;TRPV3;TRPM4;ORAI1;SLC24A4;CACNA2D3;CHRNA7;CACNA2D1;TPCN2;CACNA2D2;SLC24A2;ORAI2;P2RX4;CACNA1C;TRPC5;TRPM2;CACNA1I;RYR2;CACNG2;CACNG3;CACNA1E;CACNB2;PKD1L1;PSEN1;ANXA6;CACNA1B;CACNG8;CACNG7;CACNA1A;NALF1	LAMP5RELN
191	GO_Biological_Process_2023__Protein Insertion Into Mitochondrial Membrane (GO:0051204)	-0.407812	-2.01129	0.00309119	0.0351223	0.988	21/27	43.39%	MTX1;NDUFA13;TIMM13;TOMM22;ROMO1;TIMM8B;TIMM10;TIMM8A;MOAP1;TOMM7;HSP90AA1;TOMM40;TOMM20;TIMM10B;TIMM29;TIMM22;TRMT10B;MTCH1;COX18;SAMM50;TIMM9	LAMP5RELN
192	KEGG_2021_Human__Proteasome	-0.336514	-2.01049	0.003125	0.0351246	0.988	35/43	49.91%	PSMB8;PSME1;ADRM1;PSME2;PSMD8;PSMC5;PSMA7;PSMB6;PSMB10;PSMC4;PSMB5;PSMC3;PSME3;PSMB3;PSMD2;PSMB4;PSMD7;POMP;PSMD3;PSMC1;PSMA3;PSMD4;PSMA4;PSMA5;PSMC2;PSMD13;PSMD6;PSMB2;PSMA1;PSMB1;PSME4;PSMB7;PSMD12;PSMC6;PSMF1	LAMP5RELN
193	WikiPathway_2023_Human__Glycolysis And Gluconeogenesis WP534	-0.378941	-2.00924	0	0.0352339	0.988	18/32	25.14%	PGAM2;LDHB;TPI1;GAPDH;GCK;LDHA;ENO1;ALDOC;PGAM1;MDH2;PGK1;ENO2;MPC2;MDH1;GOT1;PFKL;PKM;PDHA1	LAMP5RELN
194	KEGG_2021_Human__Protein export	-0.426511	-2.00697	0.00323625	0.0355939	0.991	21/23	51.88%	HSPA5;SPCS1;SRP14;SEC61G;SEC11C;OXA1L;SPCS2;SEC61B;SRP9;SRPRA;SEC62;SRP19;SRPRB;SRP68;SPCS3;SEC61A1;SEC11A;IMMP1L;SRP54;SEC61A2;SRP72	LAMP5RELN
195	WikiPathway_2023_Human__Cholestasis WP5238	0.468777	2.00554	0.00956938	0.0841901	0.968	9/15	14.32%	LDLR;ABCC4;ABCC2;ABCG8;NR1H4;SLC10A1;SLC22A1;RXRA;EPHX1	LAMP5RELN
196	GO_Molecular_Function_2023__SH3 Domain Binding (GO:0017124)	0.284937	2.00391	0	0.0837482	0.968	42/52	48.90%	PLSCR1;CBLC;CYBA;MYPN;SKAP1;PTPN22;ADAM15;DRD4;WAS;AFAP1L1;MICAL1;ARHGAP27;DAB2IP;RAD9A;SHANK3;CABYR;CBLB;CASP9;DNM2;WASF2;SHANK1;CRK;ADAM9;SOCS7;RUFY1;CBL;CD2AP;PTPN12;RUFY2;ABL1;EVL;PRKN;SGIP1;ABI2;MAPT;ENAH;KHDRBS1;ZNF106;REPS1;LANCL1;AFAP1;GRB2	LAMP5RELN
197	KEGG_2021_Human__Fructose and mannose metabolism	-0.397609	-1.99912	0.00328947	0.0374516	0.992	17/28	26.34%	GMPPB;TPI1;GFUS;PMM1;ALDOC;TKFC;MPI;KHK;ENOSF1;PFKFB2;AKR1B1;GMPPA;PFKL;TIGAR;FCSK;PFKFB1;PFKFB4	LAMP5RELN
198	GO_Biological_Process_2023__Chaperone-Mediated Protein Complex Assembly (GO:0051131)	-0.443537	-1.99482	0	0.0384829	0.993	18/19	49.66%	PSMG3;HSPA1A;PFDN6;HOPX;BBS10;HSP90AB1;HSP90AA1;CCT2;PSMG1;TMEM35A;CLU;NDUFAF1;MKKS;LONP1;HSPD1;PTGES3;HSPA4;PSMG2	LAMP5RELN
199	GO_Cellular_Component_2023__U2 snRNP (GO:0005686)	-0.399368	-1.9931	0.00337838	0.0385766	0.993	22/24	52.02%	SF3B4;SF3B5;SNRPD2;SNRPB;SF3B6;SNRPE;RBMX2;PHF5A;HTATSF1;SF3B2;SNRPG;SNRPB2;SNIP1;SNRPD1;SNRPD3;SNRPA1;SF3A1;SF3A3;SNRPN;DDX46;SF3B3;SF3B1	LAMP5RELN
200	GO_Biological_Process_2023__Regulation Of Interleukin-6 Production (GO:0032675)	0.266434	1.99204	0.00306748	0.0886648	0.981	18/60	9.60%	TLR1;SYK;PLCG2;TLR2;NOS2;EOLA1;IL33;CYBA;POU2AF1;PTPN6;IFIH1;RIGI;PTPN22;LCP1;CD200R1;MAPK13;TNFSF4;F2RL1	LAMP5RELN
201	GO_Molecular_Function_2023__Endopeptidase Regulator Activity (GO:0061135)	-0.393838	-1.9912	0	0.0389204	0.993	15/29	19.91%	PSENEN;PSME1;ADRM1;CSTB;RENBP;PSME2;SERPIND1;ITIH4;PCSK1N;WFDC2;CST3;THBS1;NLRC4;PSME3;ABCA2	LAMP5RELN
202	GO_Biological_Process_2023__Nuclear-Transcribed mRNA poly(A) Tail Shortening (GO:0000289)	0.409124	1.99097	0.00733496	0.0878473	0.982	19/19	59.14%	ZFP36;PNLDC1;TNKS1BP1;PAN2;TUT7;CNOT10;CNOT9;CNOT6;SAMD4A;PARN;CNOT2;TUT4;CNOT4;CNOT6L;SAMD4B;CNOT8;CNOT7;CNOT3;CNOT11	LAMP5RELN
203	GO_Biological_Process_2023__Cellular Response To Alcohol (GO:0097306)	0.295239	1.98453	0	0.0903849	0.984	23/42	31.64%	PTGFR;GRAMD1C;BLM;SCNN1G;RAD51;GLRA1;ADCY7;ADCY8;TNFSF4;GLRA2;JUP;AKR1C3;CFTR;OSBPL7;BRCA1;GNG2;AHR;PTCH1;ADCY3;ADCY2;SPIDR;ADCY5;GPLD1	LAMP5RELN
204	WikiPathway_2023_Human__TYROBP Causal Network In Microglia WP3945	-0.367193	-1.98158	0.00489396	0.0416515	0.996	18/32	20.91%	IL18;NCKAP1L;TNFRSF1B;C3;IL10RA;IL13RA1;SPP1;IGSF6;SFT2D2;CD4;CREB3L2;PLEK;ADAP2;RPS6KA1;APBB1IP;TMEM106A;LOXL3;NPC2	LAMP5RELN
205	GO_Cellular_Component_2023__AMPA Glutamate Receptor Complex (GO:0032281)	0.411401	1.98092	0.0097561	0.091296	0.986	17/19	45.43%	CACNG4;CACNG5;SHISA7;DLG4;VWC2L;OLFM2;CACNG3;GRIA1;SHISA6;CACNG8;CACNG7;CNIH3;GRIA3;VWC2;GRIA2;SHISA9;GRIA4	LAMP5RELN
206	GO_Cellular_Component_2023__Spliceosomal snRNP Complex (GO:0097525)	-0.297893	-1.97849	0	0.0422342	0.996	43/56	52.02%	TSSC4;CD2BP2;LSM2;LSM7;LSM3;SF3B4;SF3B5;SNRPD2;SNRPB;LSM4;SNU13;SF3B6;SNRPE;SNRPA;RBMX2;PHF5A;HTATSF1;SF3B2;SNRPG;LSM5;BUD13;SNRPB2;TXNL4B;SNIP1;PPIH;SNRPD1;PRPF31;PRPF4;SNRPD3;SNRPA1;SF3A1;SNRNP200;TXNL4A;LSM6;LSM8;SF3A3;SNRPN;PRPF6;PRPF8;SNRNP70;DDX46;SF3B3;SF3B1	LAMP5RELN
207	GO_Biological_Process_2023__Inorganic Cation Transmembrane Transport (GO:0098662)	0.181146	1.97732	0.00380228	0.0921646	0.987	65/212	17.85%	SLC6A7;TRPC6;AQP8;HPN;SLC9C1;CACNA2D4;SLC12A3;SCN9A;KCNK13;SLC30A8;FXYD2;SCNN1G;KCNK2;SLC1A3;ATP2A3;ATP6V0A4;KCNH4;SLC9C2;KCNE2;ASIC2;SLC39A8;HCN4;SLC6A13;CACNG1;HTR3B;SLC11A1;KCNK10;SLC30A3;KCNN4;KCNG3;HCN3;KCNQ1;KCNA4;ASIC4;SLC40A1;TRPC4;UCP3;RYR3;TRPV3;ATP2C2;KCNA6;KCNH3;CACNA1G;ATP1A2;TRPM4;KCNN1;ORAI1;SLC30A10;SLC4A4;ATP2A1;SLC12A1;KCNG2;SLC24A4;KCNN3;KCNC4;RHCE;KCNH2;KCNH5;LRRC55;SLC6A4;TPC…	LAMP5RELN
208	WikiPathway_2023_Human__Photodynamic Therapy Induced NFE2L2 NRF2 Survival Signaling WP3612	0.419801	1.97708	0.00724638	0.091038	0.987	9/19	14.32%	ABCG2;ABCC4;MAPK11;ABCC2;JUN;ABCC6;MAPK13;MAPK12;EPHX1	LAMP5RELN
209	GO_Biological_Process_2023__Phospholipase C-activating G Protein-Coupled Receptor Signaling Pathway (GO:0007200)	0.290146	1.9755	0.00288184	0.090713	0.988	18/46	13.78%	PTGER3;DRD2;DRD5;GPR157;GPR139;OPRD1;FPR1;AGT;CHRM2;GNA14;GPR18;OPRK1;C5AR1;F2RL1;GPR35;GRM1;P2RY12;ESR1	LAMP5RELN
210	WikiPathway_2023_Human__5Q35 Copy Number Variation WP5380	-0.259522	-1.97474	0	0.0432497	0.996	36/93	23.95%	COX6A1;COX4I1;COX8A;COX7A1;TRIAP1;COX6B1;MYC;PRELID1;COX5B;MXD3;INPP5D;HIGD2A;NOP16;COX7C;BARD1;COX5A;COX7B;PDLIM7;H2AX;TSPAN17;RAB24;FGF1;CAPN3;PRR7;DDX41;FGFR4;COX6C;ABRAXAS1;BABAM1;SNCB;F12;CDHR2;PNPLA2;TMED9;CLTB;H3-3A	LAMP5RELN
211	GO_Biological_Process_2023__mRNA Destabilization (GO:0061157)	0.306646	1.96647	0.00806452	0.0948132	0.989	34/39	53.37%	ZFP36;ZFP36L1;ZFP36L2;ZC3H12D;MOV10;UPF1;DCPS;TRIM71;RIDA;KHSRP;TUT7;PDE12;CNOT1;AGO4;RC3H2;METTL16;TARDBP;FTO;RC3H1;CELF1;GIGYF2;DIS3L2;CPEB3;TUT4;ROCK1;AGO3;PUM1;ROCK2;FXR1;DHX36;AGO2;YTHDF3;METTL14;YTHDF2	LAMP5RELN
212	GO_Biological_Process_2023__Phagocytosis (GO:0006909)	0.299255	1.96631	0.00777202	0.0937289	0.989	18/43	18.53%	MSR1;RARA;AXL;ITGAM;LDLR;HAVCR1;GULP1;PECAM1;ANXA11;CD93;SLC11A1;ARHGAP25;MERTK;JMJD6;NR1H3;MYH9;GAS6;SYT7	LAMP5RELN
213	GO_Molecular_Function_2023__Protein Tyrosine/Serine/Threonine Phosphatase Activity (GO:0008138)	-0.454345	-1.96629	0.00488599	0.0459277	0.996	13/18	32.08%	DUSP23;DUSP4;DUSP6;DUSP9;DUSP7;DUSP12;DUSP10;DUSP26;DUSP19;DUSP18;DUSP16;DUSP3;SBF1	LAMP5RELN
214	GO_Biological_Process_2023__Establishment Of Protein Localization To Mitochondrion (GO:0072655)	-0.333136	-1.96623	0.00488599	0.0456159	0.996	31/41	45.70%	TIMM17B;TIMM13;TOMM22;TSPO;ROMO1;TIMM8B;TIMM10;AIP;PAM16;TOMM7;TIMM17A;TIMM21;TOMM40L;FIS1;TOMM40;BCAP31;TOMM20;DNAJC19;TIMM44;TIMM50;TOMM34;PINK1;GRPEL2;GRPEL1;HSPD1;FBXO7;MFF;TIMM9;DNAJC15;TIMM23;MFN2	LAMP5RELN
215	KEGG_2021_Human__Alcoholism	-0.246706	-1.96316	0.00143266	0.0463511	0.996	40/106	24.69%	CRH;H2BC4;NPY;CREB5;H2BC21;H2AC8;HRAS;H4C8;SLC18A2;H4C5;BDNF;FOSB;ADORA2B;GNG3;GRIN2C;H2BC18;H2AZ1;H2AX;SHC4;H2BC15;H2AC20;SLC29A1;H2BC6;H4C3;CREB3L2;H2AJ;CREB3;CALM2;SHC1;ATF4;ARAF;DRD1;CALM3;PPP1R1B;PPP1CA;CALM1;H2BC5;H3-3A;HDAC6;H3-3B	LAMP5RELN
216	GO_Cellular_Component_2023__Ionotropic Glutamate Receptor Complex (GO:0008328)	0.330041	1.96297	0.0025974	0.0946545	0.989	26/32	45.62%	GRIK3;CACNG4;CACNG5;PTK2B;GRIN2D;GRID2;SHISA7;DLG4;VWC2L;OLFM2;CACNG3;GRIK4;GRIA1;SHISA6;CACNG8;CACNG7;CNIH3;GRIK1;GRIA3;VWC2;GRIA2;GRIN2B;GRIN2A;SHISA9;GRIA4;GRIK2	LAMP5RELN
217	KEGG_2021_Human__Protein processing in endoplasmic reticulum	-0.224081	-1.96039	0.00272851	0.0471432	0.997	123/161	57.07%	SSR4;UBXN1;HSPA5;HSPA8;STUB1;HSPA1A;SELENOS;LMAN1L;BAG1;DDIT3;CRYAB;RNF5;PPP1R15A;HSPA1L;HERPUD1;SEC61G;CALR;SSR2;ERP29;HSP90AB1;ATF4;BAX;HSP90AA1;PREB;DNAJB11;XBP1;SEC24D;HSPBP1;FBXO6;FBXO2;YOD1;HSPA1B;BCAP31;HSPA2;CKAP4;MOGS;RRBP1;TRAM1L1;PDIA4;DNAJA1;TRAF2;UBXN8;RAD23A;DDOST;SEC61B;UFD1;DNAJC5;STT3A;HSP90B1;GANAB;SYVN1;HYOU1;DAD1;SEC62;SSR3;UBQLN2;DNAJA2;PRKCSH;CAPN1;ERLEC1;CANX;UBE2J2;MAP2K7;…	LAMP5RELN
218	GO_Biological_Process_2023__Superoxide Metabolic Process (GO:0006801)	-0.430056	-1.95655	0.00648298	0.0481005	0.997	14/21	26.78%	PRDX2;PREX1;TAFA4;PRDX1;CYBB;SOD1;NOXO1;DUOX1;MT3;CCS;NQO1;NOXA1;ATP7A;NOX5	LAMP5RELN
219	GO_Biological_Process_2023__Regulation Of Signal Transduction By P53 Class Mediator (GO:1901796)	-0.328955	-1.95088	0.00157978	0.0498356	0.998	27/45	36.37%	RRS1;RPS15;RPL11;RPL17;PAK1IP1;SETD9;AURKA;PLK3;RPL5;PIP4P1;BOP1;RPS20;PRMT5;CHEK1;SOX4;CDK5RAP3;GET1;HEXIM1;TP53RK;NOP53;URB2;RFFL;USP2;RPL37;MLF1;NUAK1;DYRK2	LAMP5RELN
220	GO_Cellular_Component_2023__Preribosome, Large Subunit Precursor (GO:0030687)	-0.457514	-1.94775	0.0033557	0.050731	0.998	12/18	27.98%	RRS1;WDR74;EBNA1BP2;PPAN;EIF6;ZNF622;NIP7;PES1;FTSJ3;MAK16;MRTO4;NOC2L	LAMP5RELN
221	GO_Molecular_Function_2023__Sodium Ion Transmembrane Transporter Activity (GO:0015081)	0.343502	1.94652	0.00530504	0.103062	0.992	17/27	31.94%	SLC9C1;SLC12A3;SCNN1G;SLC9C2;ASIC4;SLC8B1;TRPM4;SLC9B1;SLC9A5;CNNM4;SLC8A2;SLC9A7;SLC9A1;SLC8A1;SLC41A3;SLC9A8;SLC8A3	LAMP5RELN
222	GO_Biological_Process_2023__Positive Regulation Of Angiogenesis (GO:0045766)	0.241229	1.94477	0	0.102627	0.993	29/74	19.13%	SMOC2;RRAS;HK2;ITGA5;EMILIN2;NINJ1;RAPGEF3;FLT1;EMP2;HYAL1;PRKD2;RUNX1;GAB1;HSPB1;FGF18;VEGFA;ZNF304;JUP;TEK;ETS1;VASH2;CTSH;FGF2;CHRNA7;PDCD6;BRCA1;PAK4;PRKD1;PIK3CD	LAMP5RELN
223	GO_Biological_Process_2023__Inner Mitochondrial Membrane Organization (GO:0007007)	-0.356801	-1.94376	0.00631912	0.0517159	0.998	31/34	56.99%	MTX1;NDUFA13;TIMM13;UQCC3;ROMO1;MICOS13;TIMM8B;TIMM10;TIMM8A;TMEM11;GHITM;TIMM10B;TIMM29;MICOS10;TIMM22;TRMT10B;LETM1;TAFAZZIN;SAMM50;CIBAR1;TIMM9;HSPA9;MTX3;IMMT;MTX2;APOOL;TOMM70;SLC25A46;CHCHD6;CHCHD3;OPA1	LAMP5RELN
224	GO_Biological_Process_2023__Cellular Response To Metal Ion (GO:0071248)	0.218527	1.9412	0	0.103657	0.993	40/105	21.79%	PLCG2;MT1X;SLC13A5;MT1G;F3;JUN;MT1E;MT1M;GLRA1;ADCY7;ECT2;RASA4;ADCY8;RYR1;CPNE9;SYT17;RYR3;GLRA2;MT2A;ADGRV1;SYT15;SYT2;AKR1C3;ITPKB;AKT1;CPNE7;CDKN2AIP;CPNE4;CPNE8;TFR2;SYT7;HSF1;NEK7;CPNE5;ITPKC;DLG4;SNCA;P2RX4;CLIC4;NLGN1	LAMP5RELN
225	GO_Biological_Process_2023__Sensory Organ Development (GO:0007423)	-0.344546	-1.94036	0.00309119	0.0525861	0.998	14/39	11.14%	SCO2;OLIG2;OLIG1;ADAMTS18;ASCL1;NEUROD6;CHD7;PBX3;BLOC1S3;MEIS2;PAX8;MEIS1;NEUROD2;PAX6	LAMP5RELN
226	MSigDB_Hallmark_2020__Myc Targets V2	-0.309639	-1.93734	0.00310559	0.0535028	0.998	37/52	43.11%	HSPE1;EXOSC5;MYC;NOC4L;DCTPP1;BYSL;RRP9;GRWD1;NOP16;WDR74;PPAN;NIP7;SRM;NDUFAF4;PES1;IMP4;TBRG4;CDK4;MCM4;MRTO4;PA2G4;PPRC1;AIMP2;NOP56;GNL3;NOLC1;TFB2M;UTP20;MYBBP1A;NPM1;FARSA;TCOF1;HSPD1;MPHOSPH10;CBX3;DDX18;SUPV3L1	LAMP5RELN
227	GO_Biological_Process_2023__Interferon-Mediated Signaling Pathway (GO:0140888)	0.35364	1.93322	0.00773196	0.108036	0.995	11/25	18.89%	OAS2;IFNLR1;IFITM3;HCK;SP100;IRAK1;IL10RB;STAT2;TBKBP1;TYK2;IFNAR2	LAMP5RELN
228	GO_Biological_Process_2023__Regulation Of Angiogenesis (GO:0045765)	0.203944	1.93085	0	0.108364	0.996	43/132	17.71%	PIK3CG;NIBAN2;ALOX5;SMOC2;RRAS;HK2;EMILIN2;NINJ1;RAPGEF3;FLT1;DCN;HSPG2;EMP2;CD160;HYAL1;RHOJ;PRKD2;RUNX1;ADAMTS1;GAB1;SP100;HSPB1;SULF1;FGF18;ERBB2;VEGFA;ZNF304;JUP;PML;TEK;ETS1;VASH2;CTSH;ADGRB1;EGLN1;ADGRA2;FGF2;CHRNA7;PDCD6;AMOT;BRCA1;CEMIP2;PAK4	LAMP5RELN
229	GO_Biological_Process_2023__mRNA Processing (GO:0006397)	-0.210332	-1.93027	0	0.0558911	0.999	154/205	56.80%	RNF113A;HSPA8;RAMAC;ESS2;LSM2;LSM7;LSM3;U2AF1L4;SF3B4;WDR83;SF3B5;SNRPD2;GEMIN7;BUD31;GPKOW;SNRPB;LSM4;MBLAC1;GEMIN6;DDX41;RBM42;IK;NUDT21;SNU13;DBR1;BCAS2;SF3B6;ISY1;HNRNPA1;DHX16;TBRG4;SNRPE;EIF4A3;PPARGC1A;ZMAT2;CWC15;DHX38;SRSF8;SNRPA;RBMX2;PHF5A;RBM8A;PIN1;RBM22;HEXIM1;SYF2;CMTR2;XAB2;HTATSF1;RBM4B;SF3B2;SNRPG;LSM5;BUD13;HNRNPK;SNRPB2;SNIP1;SRSF2;CRNKL1;MAGOH;METTL3;PPIH;SNRPD1;PPIL1;NCBP2;F…	LAMP5RELN
230	GO_Biological_Process_2023__Positive Regulation Of ERK1 And ERK2 Cascade (GO:0070374)	-0.247152	-1.92982	0	0.0556797	0.999	44/109	23.47%	CALCR;BMP2;PTPRC;MUSK;CCN2;CIB1;HRAS;DDT;ADRA1D;FGFR2;FGFR3;PHB1;CD74;KDR;GPR183;TNFSF11;PDGFB;GLIPR2;PRXL2C;ALKAL1;F2R;FGF1;ROR1;THPO;CD4;OPRM1;PHB2;SEMA7A;HTR2B;SCIMP;FGFR4;SHC1;HTR2A;PDGFA;CX3CL1;DDR1;CXCL17;PDGFC;MT3;APOE;HTR2C;SPRY2;PDGFD;NECAB2	LAMP5RELN
231	GO_Biological_Process_2023__Antimicrobial Humoral Response (GO:0019730)	-0.424968	-1.92798	0.00331126	0.0562089	0.999	14/21	26.00%	H2BC21;ROMO1;FAU;GAPDH;PRSS3;CXCL14;WFDC3;PGLYRP1;WFDC2;HLA-A;HMGN2;RPL39;RPL30;FAM3A	LAMP5RELN
232	GO_Molecular_Function_2023__Potassium Channel Activity (GO:0005267)	0.25445	1.92655	0.00307692	0.109643	0.996	27/61	23.17%	KCNK13;KCNK2;KCNH4;HCN4;KCNK10;KCNN4;GRIK3;HCN3;KCNQ1;KCNA4;KCNA6;KCNH3;KCNN1;KCNMB3;KCNG2;KCNC4;KCNH2;KCNH5;LRRC55;KCNK6;KCNC3;KCNT1;TMEM38A;KCNQ4;KCNQ5;KCNT2;KCNQ2	LAMP5RELN
233	KEGG_2021_Human__Complement and coagulation cascades	0.320336	1.9252	0.00273224	0.109361	0.996	13/33	10.83%	SERPINF2;F11;ITGAM;F3;CR1;C6;C1R;PLG;C5AR1;VWF;C2;CFD;F8	LAMP5RELN
234	GO_Biological_Process_2023__Sodium Ion Transmembrane Transport (GO:0035725)	0.248209	1.921	0.00543478	0.110873	0.996	26/61	24.11%	SLC6A7;SLC9C1;SLC12A3;SCN9A;SLC5A2;FXYD2;SCNN1G;SLC9C2;ASIC2;HCN4;SLC6A13;HCN3;ASIC4;ATP1A2;TRPM4;SLC4A4;SLC12A1;SLC24A4;SLC6A4;TPCN2;SLC9A5;SLC24A2;SLC6A6;SLC8A2;SLC9A7;SLC9A1	LAMP5RELN
235	KEGG_2021_Human__Viral protein interaction with cytokine and cytokine receptor	-0.431535	-1.91826	0.00173611	0.0598105	0.999	13/20	24.95%	IL18;TNFRSF1B;CX3CR1;IL10RA;CXCL14;ACKR4;TNFRSF10B;IL18R1;CX3CL1;CCR10;IL6R;TNFRSF14;TNFRSF1A	LAMP5RELN
236	GO_Biological_Process_2023__Positive Regulation Of Cation Transmembrane Transport (GO:1904064)	0.427309	1.91423	0.00497512	0.114176	0.996	8/16	17.77%	STAC;EDN1;KCNN4;KCNQ1;EDNRA;FLNA;KCNH2;CTSS	LAMP5RELN
237	WikiPathway_2023_Human__Sleep Regulation WP3591	-0.389144	-1.91211	0.00821018	0.0622701	0.999	13/24	24.64%	CRH;IL18;HCRTR1;FOS;PTGDS;HCRTR2;SLC29A1;CST3;ADA;HTR2A;DRD1;ADORA1;AHCY	LAMP5RELN
238	WikiPathway_2023_Human__Parkin Ubiquitin Proteasomal System Pathway WP2359	-0.291052	-1.90775	0.00597907	0.0638509	1	47/63	50.52%	GPR37;HSPA5;HSPA8;TUBB2A;STUB1;HSPA1A;PSMD8;TUBA1B;PSMC5;TUBA4A;TUBB3;TUBB4B;TUBA1A;HSPA1L;SEPTIN5;PSMC4;PSMC3;TUBB;PSMD2;CCNE1;PSMD10;HSPA1B;TUBB4A;HSPA2;CASP8;PSMD7;TUBB2B;UBE2L6;SIAH2;PSMD3;PSMC1;UBE2J2;SNCAIP;PSMD4;SIAH1;PSMC2;UBA1;PSMD13;PSMD6;UBE2L3;UBE2J1;HSPA9;HSPA4;PSMD12;PSMD5;PSMC6;FBXW7	LAMP5RELN
239	GO_Biological_Process_2023__Visual Perception (GO:0007601)	0.267802	1.90739	0.0056338	0.117629	0.997	22/53	20.63%	EFEMP1;RDH12;COL1A1;KIFC3;CACNA2D4;CRYBG3;POU6F2;NXNL2;COL11A1;GUCA1B;CRYZ;ADGRV1;RABGGTA;WFS1;PDE6C;IMPG2;EYS;RP2;CEP250;RABGGTB;DHRS3;COL18A1	LAMP5RELN
240	GO_Biological_Process_2023__Axonal Transport (GO:0098930)	-0.339375	-1.89862	0.00326264	0.0682863	1	34/38	58.27%	BLOC1S1;BLOC1S4;BLOC1S3;NEFL;HSBP1;SOD1;SNAPIN;BLOC1S5;KIF4A;DCTN1;APEX1;AP3S2;HDAC6;BLOC1S6;AP3M2;ARL8A;BLOC1S2;KIF3B;KIF1A;HIF1A;KIF3A;AP3D1;DTNBP1;AP3M1;ARL8B;RAB21;AP3S1;DYNC1H1;PAFAH1B1;OPA1;MAPT;FBXW11;DST;KIF1B	LAMP5RELN
241	GO_Cellular_Component_2023__U2-type Catalytic Step 2 Spliceosome (GO:0071007)	-0.360256	-1.89449	0.00840336	0.0699356	1	24/29	49.87%	SNRPD2;BUD31;SNRPB;BCAS2;SNRPE;CWC15;RBM22;SYF2;XAB2;SNRPG;SNRPB2;CRNKL1;SNRPD1;PPIL1;SNRPD3;SNRPA1;PPIE;EFTUD2;CDC5L;SNW1;PLRG1;CDC40;CWC22;PRPF8	LAMP5RELN
242	GO_Biological_Process_2023__Regulation Of Activated T Cell Proliferation (GO:0046006)	-0.438681	-1.89304	0.00655738	0.0701393	1	13/18	37.28%	IL18;FADD;TNFSF9;ICOSLG;CD24;IGFBP2;CRTAM;PDCD1LG2;BTN2A2;SCRIB;PRKAR1A;IGF1;RPS3	LAMP5RELN
243	GO_Biological_Process_2023__Acylglycerol Catabolic Process (GO:0046464)	0.414976	1.89283	0.00773196	0.127124	0.998	8/17	13.90%	ABHD12B;LIPC;PNPLA1;LCP1;PNPLA3;PNPLA5;CPS1;FAAH	LAMP5RELN
244	GO_Biological_Process_2023__Glucose Metabolic Process (GO:0006006)	-0.306692	-1.89196	0.00607903	0.070149	1	24/47	26.40%	KRT17;PGAM2;TPI1;GCK;ENO1;SLC37A4;OMA1;PGAM1;MDH2;G6PD;PGK1;ENO2;ATF4;DCXR;GALM;POLR2D;PPARGC1A;MDH1;G6PC3;SLC25A1;APOD;CRTC2;PFKFB1;KCNJ11	LAMP5RELN
245	GO_Biological_Process_2023__Lysosomal Lumen Acidification (GO:0007042)	-0.465836	-1.88812	0.00681431	0.0711721	1	11/16	29.97%	ATP6V1F;TMEM199;ATP6V0B;GRN;ATP6AP2;RNASEK;CCDC115;CLN6;ATP6V1D;PPT1;TMEM9	LAMP5RELN
246	GO_Biological_Process_2023__Negative Regulation Of Intrinsic Apoptotic Signaling Pathway (GO:2001243)	-0.30666	-1.8872	0.00618238	0.0712611	1	32/51	39.68%	NDUFA13;PARK7;HTRA2;HSPA1A;SELENOS;TPT1;ENO1;PPIF;PPIA;NDUFS3;MAPK7;PLAUR;HERPUD1;CREB3;NOL3;XBP1;CDKN2D;DNAJA1;TRIM32;SYVN1;HYOU1;NOC2L;BCL2L2;PINK1;CLU;ARHGEF2;CCAR2;TXNDC12;BAG5;ARMC10;BCL2L1;SOD2	LAMP5RELN
247	GO_Biological_Process_2023__Sodium Ion Transport (GO:0006814)	0.249364	1.88635	0.00872093	0.130591	0.999	21/63	17.46%	SLC6A7;SLC5A8;SLC12A3;SCN9A;SLC5A2;SCNN1G;SLC5A4;SCN7A;ASIC2;HCN4;SLC6A13;HCN3;ASIC4;ATP1A2;SLC4A4;SLC12A1;SLC24A4;SCN11A;SLC6A4;TPCN2;SLC9A5	LAMP5RELN
248	GO_Biological_Process_2023__Epithelial Cell Differentiation (GO:0030855)	-0.283543	-1.88614	0.00301205	0.0714076	1	25/61	21.81%	KRT17;DNPH1;KRT10;ASCL1;TAGLN2;FGFR2;DEUP1;OVOL2;MESP1;AKR1C2;EDF1;KDR;RHCG;ALDOC;PIH1D1;TST;PGK1;CPT1A;CBR1;PLAAT3;VDAC1;E2F4;CDHR2;GSTK1;BDH2	LAMP5RELN
249	GO_Molecular_Function_2023__bHLH Transcription Factor Binding (GO:0043425)	0.421525	1.88529	0.00740741	0.130274	0.999	8/16	16.52%	SCX;BHLHE40;FHL2;LMO2;USF1;PSMD9;SMAD3;TCF3	LAMP5RELN
250	KEGG_2021_Human__Cardiac muscle contraction	-0.274822	-1.88333	0.00149925	0.0724954	1	20/65	12.26%	COX6A1;TNNI3;COX4I1;COX8A;UQCRFS1;COX7A1;UQCRQ;COX6B1;CYC1;UQCR11;COX7A2;COX5B;UQCR10;COX7C;COX5A;COX7B;UQCRB;CACNB3;UQCRH;TRDN	LAMP5RELN
251	GO_Biological_Process_2023__Tail-Anchored Membrane Protein Insertion Into ER Membrane (GO:0071816)	-0.472096	-1.88315	0.00511073	0.0721586	1	15/16	45.19%	EMC6;EMC7;GET3;EMC9;EMC4;UBL4A;CAMLG;GET1;EMC10;MMGT1;SGTA;EMC3;EMC8;EMC1;EMC2	LAMP5RELN
252	GO_Biological_Process_2023__Organic Hydroxy Compound Transport (GO:0015850)	0.321069	1.88303	0	0.131002	0.999	12/30	13.94%	SLC5A8;ABCC4;SLC29A3;ABCC2;ABCG8;SLCO2B1;SLC10A1;SLCO1C1;SLC51A;SLC44A2;SLC22A1;AKR1C1	LAMP5RELN
253	GO_Biological_Process_2023__Inflammatory Response (GO:0006954)	0.212058	1.88247	0	0.129981	0.999	27/105	10.30%	TLR1;PTGFR;NOX1;PTGER3;PIK3CG;TLR2;TMIGD3;NOS2;CD44;CIITA;HRH4;HSPG2;HYAL1;BLNK;CD96;CYBA;FPR1;CSF1R;NOD1;SIGLEC1;SLC11A1;ADCY8;C5AR1;IL10RB;TNFSF4;NFAM1;ACKR1	LAMP5RELN
254	GO_Biological_Process_2023__Positive Regulation Of Release Of Sequestered Calcium Ion Into Cytosol (GO:0051281)	-0.412155	-1.88208	0.00977199	0.0722029	1	12/21	23.57%	F2R;TRDN;CASQ1;GSTO1;CALM2;CAPN3;CX3CL1;DRD1;CALM3;APEX1;THY1;CALM1	LAMP5RELN
255	GO_Biological_Process_2023__protein-RNA Complex Assembly (GO:0022618)	-0.221776	-1.8789	0.00137931	0.0732974	1	93/139	52.02%	TSSC4;RPS5;RPL10;RAMAC;RRS1;RPL6;RPS15;RPLP0;RPS14;RPL11;PPAN;EIF6;GEMIN4;SNRPD2;GEMIN7;TARBP2;RPL23A;RPL38;PUF60;EIF3G;MRPS7;SNRPB;LSM4;ERAL1;EIF3I;RPS28;GEMIN6;RPL5;HSP90AB1;NUDT21;NOL3;RPS27;HSP90AA1;ISY1;BOP1;POLR2D;PRMT5;SNRPE;TRAF7;EIF3D;RPSA;RRP7A;BRIX1;HEXIM1;MRPL20;XAB2;EIF3C;SNRPG;NOP53;RPS19;WDR77;CRNKL1;SNRPD1;EIF2S2;MRPS11;SNRPD3;EIF3K;EIF3F;DDX20;SRSF9;COIL;EIF2S3;STRAP;EIF5;RPS27L;…	LAMP5RELN
256	MSigDB_Hallmark_2020__TNF-alpha Signaling via NF-kB	-0.223999	-1.87748	0.00273973	0.0735618	1	49/140	18.61%	FJX1;CD83;NR4A2;BMP2;IL18;IER3;TNFSF9;MYC;BTG3;ICOSLG;FOS;KLF10;HES1;PDE4B;NR4A3;FOSB;EGR1;TUBB2A;CEBPB;DUSP4;NR4A1;MAFF;ATF3;NFKBIE;GPR183;DUSP1;EIF1;YRDC;IER2;MAP3K8;RELB;TAP1;PPP1R15A;BTG2;PLAUR;FOSL2;BCL3;TRAF1;ID2;PLEK;NFKBIA;ETS2;GADD45A;LAMB3;IER5;TNIP2;JUNB;PANX1;RCAN1	LAMP5RELN
257	GO_Biological_Process_2023__Phosphatidylinositol-Mediated Signaling (GO:0048015)	0.257882	1.86828	0.00859599	0.137187	1	34/55	37.43%	PLCG2;PIK3CG;PIK3R5;ZFP36L1;PTAFR;ERBB3;CD160;CSF1R;PDGFRB;EDN1;ERBB2;PLCB3;EZR;PLCH1;PIK3CD;IRS1;PLCB4;PITPNM2;PI4KB;PLCG1;STAT3;GAB2;PIK3R1;PIK3C2B;PIK3C2A;PI4KA;RPS6KB1;PLCB1;KCNH1;PIK3CB;PLEKHA1;OGT;PIK3C3;IGF1R	LAMP5RELN
258	GO_Biological_Process_2023__Negative Regulation Of Apoptotic Signaling Pathway (GO:2001234)	-0.26962	-1.86744	0.00445104	0.0787065	1	39/73	35.00%	NDUFA13;NR4A2;TRIAP1;CX3CR1;SLC25A5;PARK7;BDNF;PRELID1;HSPA1A;GSTP1;PPIF;NDUFS3;SLC25A4;PLAUR;HERPUD1;PIH1D1;THBS1;GRINA;PSME3;CX3CL1;NOL3;MAZ;FXN;TMBIM1;PSMD10;AKR1B1;RELA;QARS1;GHITM;NOC2L;BCL2L2;PELI3;SIAH2;SLC35F6;TMEM14A;PINK1;CLU;MAPK8IP2;MEN1	LAMP5RELN
259	MSigDB_Hallmark_2020__KRAS Signaling Up	-0.226799	-1.86725	0.00687758	0.0783992	1	60/138	29.84%	RBP4;PSMB8;IKZF1;ITGA2;RELN;DOCK2;BMP2;TNFRSF1B;HSD11B1;NRP1;PRDM1;TMEM176B;IL10RA;SEMA3B;F13A1;ACE;GADD45G;ANGPTL4;DUSP6;YRDC;SOX9;SPP1;RGS16;ENG;ETV5;ITGBL1;PPP1R15A;PCSK1N;PLAUR;PLAT;PCP4;TRAF1;ID2;ADAM8;ALDH1A2;IL1RL2;PDCD1LG2;TPH1;NAP1L2;BPGM;TRIB2;SPRY2;SCN1B;TSPAN7;PRELID3B;SPON1;ST6GAL1;APOD;MMD;GABRA3;GLRX;ETV1;IGFBP3;PEG3;ABCB1;SPARCL1;FUCA1;WNT7A;CPE;SATB1	LAMP5RELN
260	GO_Biological_Process_2023__Monoatomic Cation Transmembrane Transport (GO:0098655)	0.172332	1.86674	0.00381679	0.137103	1	64/215	17.85%	SLC6A7;TRPC6;HPN;SLC9C1;CACNA2D4;SLC12A3;CNGB3;SCN9A;KCNK13;SLC30A8;FXYD2;SCNN1G;KCNK2;SLC1A3;ATP2A3;ATP6V0A4;KCNH4;SLC9C2;KCNE2;ASIC2;SLC39A8;HCN4;SLC6A13;CACNG1;SLC11A1;KCNK10;SLC30A3;KCNN4;KCNG3;HCN3;KCNQ1;KCNA4;ASIC4;SLC40A1;TRPC4;UCP3;RYR3;TRPV3;ATP2C2;KCNA6;KCNH3;CACNA1G;ATP1A2;TRPM4;KCNN1;ORAI1;SLC30A10;SLC4A4;ATP2A1;SLC12A1;KCNG2;SLC24A4;KCNN3;KCNC4;KCNH2;KCNH5;LRRC55;SLC6A4;TPCN2;KCNK6;G…	LAMP5RELN
261	KEGG_2021_Human__Antigen processing and presentation	-0.31914	-1.86671	0.00447761	0.0782175	1	21/43	22.67%	PSME1;HSPA5;RFXANK;HSPA8;CD74;HSPA1A;PSME2;TAP1;HSPA1L;CD4;CALR;HLA-B;HSP90AB1;PSME3;B2M;HSP90AA1;HLA-A;CTSL;HSPA1B;HSPA2;HLA-C	LAMP5RELN
262	GO_Biological_Process_2023__Tumor Necrosis Factor-Mediated Signaling Pathway (GO:0033209)	-0.351757	-1.86358	0.00487805	0.0795428	1	16/32	24.95%	TRAF4;TNFRSF1B;TXNDC17;RRAGA;ST18;TMSB4X;EIF5A;TNFSF11;TRAF1;NFKBIA;TRADD;TP53;CARD14;RELA;TRAF2;TNFRSF1A	LAMP5RELN
263	GO_Biological_Process_2023__acyl-CoA Metabolic Process (GO:0006637)	0.3682	1.86356	0.00761421	0.138109	1	11/22	20.02%	ACSM1;GLYAT;ACSM5;ACSM3;ACOT12;BAAT;HMGCS1;ACACB;MCEE;ACOT9;MLYCD	LAMP5RELN
264	GO_Biological_Process_2023__Mitotic Sister Chromatid Cohesion (GO:0007064)	0.422253	1.85791	0.00909091	0.141188	1	15/15	57.82%	DSCC1;HDAC8;NPC1;MAU2;SMC1A;ESCO1;PDS5A;STAG2;STAG1;NAA50;NIPBL;RB1;PDS5B;SMC3;RAD21	LAMP5RELN
265	GO_Molecular_Function_2023__Voltage-Gated Potassium Channel Activity (GO:0005249)	0.243737	1.85555	0	0.141711	1	28/63	23.17%	KCNE4;KCNK2;KCNH4;KCNE2;HCN4;KCNG3;HCN3;KCNQ1;KCNJ14;KCNA4;KCNA6;KCNH3;KCNN1;KCNG2;KCNN3;KCNC4;KCNH2;KCNH5;LRRC55;KCNK6;KCNC3;KCNT1;KCNB2;KCNJ12;KCNQ4;KCNQ5;KCNT2;KCNQ2	LAMP5RELN
266	WikiPathway_2023_Human__Peptide GPCRs WP24	-0.350326	-1.85375	0.00629921	0.0847189	1	17/32	21.92%	AVPR1A;HCRTR1;CX3CR1;FPR3;GNRHR;SSTR1;NMBR;TSHR;TAC4;OPRL1;TACR3;CCKBR;OPRM1;SSTR4;NPY5R;GRPR;CCR10	LAMP5RELN
267	GO_Biological_Process_2023__Cell-Matrix Adhesion (GO:0007160)	0.230729	1.85175	0.00662252	0.143317	1	30/75	22.75%	ITGB4;ITGA8;ITGAM;ADAMTS12;ITGA5;CD44;EMP2;PTPRK;CD96;HPSE;FBLN5;NPNT;ITGA1;SIGLEC1;STRC;FERMT1;ITGA2B;ADAM15;ITGA10;ITGA9;THSD1;THBS3;TAOK2;OTOA;BCAT2;ADAMTS13;ITGA6;ITGB5;BCR;SRC	LAMP5RELN
268	GO_Biological_Process_2023__Negative Regulation Of Supramolecular Fiber Organization (GO:1902904)	-0.274805	-1.85038	0.00449102	0.0862609	1	34/66	36.55%	SPEF1;CIB1;CHADL;PFDN5;HSPA8;PLEKHH2;CAV3;STMN1;PFDN6;CORO1A;CRYAB;MID1IP1;PFN1;PFN2;KANK1;VBP1;MYADM;TWF2;PFDN2;SSH3;APOE;TUBB4A;TWF1;PRKCD;HIP1R;MAPRE1;ARPIN;PFDN4;STMN2;KATNB1;CLU;APC2;ARHGEF2;CLIP3	LAMP5RELN
269	GO_Biological_Process_2023__Potassium Ion Transmembrane Transport (GO:0071805)	0.20649	1.8488	0	0.142715	1	43/106	24.11%	HPN;SLC9C1;SLC12A3;KCNE4;KCNK13;FXYD2;KCNK2;SLC1A3;KCNH4;SLC9C2;KCNE2;HCN4;KCNK10;KCNN4;KCNG3;HCN3;KCNQ1;KCNJ14;KCNA4;KCNA6;KCNH3;ATP1A2;KCNN1;SLC12A1;KCNG2;SLC24A4;KCNN3;KCNC4;KCNH2;KCNH5;LRRC55;KCNK6;SLC9A5;KCNC3;KCNB2;KCNJ12;SLC24A2;KCNQ4;KCNQ5;KCNT2;KCNQ2;SLC9A7;SLC9A1	LAMP5RELN
270	GO_Cellular_Component_2023__Spliceosomal tri-snRNP Complex (GO:0097526)	-0.332582	-1.84388	0.00955414	0.0892625	1	27/35	47.65%	LSM2;LSM7;LSM3;SNRPD2;SNRPB;LSM4;RBM42;SNU13;SNRPE;ZMAT2;SNRPA;SNRPG;LSM5;TXNL4B;PPIH;SNRPD1;PRPF31;PRPF4;SNRPD3;SNRNP27;EFTUD2;SNRNP200;TXNL4A;LSM6;LSM8;SNRPN;PRPF6	LAMP5RELN
271	GO_Cellular_Component_2023__U4/U6 X U5 tri-snRNP Complex (GO:0046540)	-0.332582	-1.84388	0.00955414	0.0892625	1	27/35	47.65%	LSM2;LSM7;LSM3;SNRPD2;SNRPB;LSM4;RBM42;SNU13;SNRPE;ZMAT2;SNRPA;SNRPG;LSM5;TXNL4B;PPIH;SNRPD1;PRPF31;PRPF4;SNRPD3;SNRNP27;EFTUD2;SNRNP200;TXNL4A;LSM6;LSM8;SNRPN;PRPF6	LAMP5RELN
272	GO_Biological_Process_2023__Positive Regulation Of Mitochondrion Organization (GO:0010822)	-0.304341	-1.84108	0.00625978	0.0904973	1	20/48	21.25%	PARK7;CHCHD10;HTRA2;KDR;MOAP1;HRK;PPIF;BOK;PLAUR;AURKA;MLLT11;MUL1;GSK3A;BAX;TP53;PGAM5;FIS1;PLD6;BAD;PPARGC1A	LAMP5RELN
273	WikiPathway_2023_Human__Burn Wound Healing WP5055	0.283699	1.83693	0.00833333	0.148776	1	16/40	15.98%	HGF;ICAM1;COL1A1;INHBA;DCN;ELN;PECAM1;TNC;PDGFRB;EGF;VEGFA;TAGLN;AKT1;MMP28;SMAD3;CHRNA7	LAMP5RELN
274	GO_Biological_Process_2023__Positive Regulation Of Phospholipase C Activity (GO:0010863)	-0.366126	-1.83671	0.00655738	0.0920761	1	12/26	16.36%	AVPR1A;CD86;LPAR1;HRAS;NMUR1;ADRA1D;PHB1;TXK;PLCB2;PHB2;HTR2B;HTR2A	LAMP5RELN
275	WikiPathway_2023_Human__Hippo Merlin Signaling Dysregulation WP4541	0.20646	1.83006	0.00943396	0.150463	1	27/98	13.37%	ITGB4;CDH24;ITGA8;CDH9;ITGAM;CDH17;ITGA5;CD44;FLT1;FLT3;CSF1R;ITGA1;PDGFRB;CCND1;CDH22;LIN28B;ITGA2B;FOXM1;YAP1;CDH3;CDH12;ITGA10;PAK6;TEK;ITGA9;WWTR1;CDH4	LAMP5RELN
276	GO_Biological_Process_2023__Positive Regulation Of Proteolysis (GO:0045862)	-0.304641	-1.82811	0.00458716	0.0972307	1	20/45	24.26%	NDUFA13;AURKAIP1;TNFRSF1B;FADD;STUB1;RCAN3;ATP5IF1;SH3D19;CAPN3;NLRC4;FGFR4;GBA1;FURIN;CTSL;APOE;BAD;CASP8;TBC1D10A;CLN6;TRIM32	LAMP5RELN
277	GO_Biological_Process_2023__Positive Regulation Of Endothelial Cell Migration (GO:0010595)	0.22979	1.82759	0.0060423	0.151305	1	27/70	21.47%	PIK3CG;ATOH8;SMOC2;RRAS;AGT;STAT5A;ANGPT1;PRKD2;EGF;EDN1;HSPB1;FGF18;VEGFA;NELL1;PTK2B;TEK;ETS1;AKT1;TGFB1;FGF2;PDCD6;PLPP3;BCAR1;PRKD1;PIK3CD;P2RX4;NELL2	LAMP5RELN
278	WikiPathway_2023_Human__Metabolic Epileptic Disorders WP5355	-0.261945	-1.82466	0.00747384	0.0985229	1	42/72	37.55%	PHGDH;PGAM2;LDHB;SLC25A5;TPI1;GAPDH;GCK;LDHA;SHMT2;SPCS1;ENO1;MOCS3;ALDOC;PGAM1;MDH2;SLC25A15;AASS;PGK1;ENO2;GAMT;MPC2;ASS1;MDH1;GOT1;GATM;SUOX;PFKL;SLC25A1;PKM;PDHA1;PSAT1;ETHE1;ECHS1;GLS2;PSPH;CDO1;SLC2A3;MPC1;PFKM;MOCS2;CTH;DLD	LAMP5RELN
279	GO_Biological_Process_2023__Mitochondrion Organization (GO:0007005)	-0.219949	-1.82331	0.00421348	0.0989258	1	98/144	51.23%	MTX1;TIMM17B;TIMM13;TOMM22;COX7A1;TSPO;CHCHD2;TIMM8B;HSD17B10;ATP5F1D;TIMM10;PARK7;COX7A2;CHCHD10;AIP;PHB1;BCS1L;HIGD2A;STOML2;HAX1;HIGD1B;RAB5IF;TOMM7;TMEM70;FMC1;HIGD1A;OMA1;SLC25A4;THG1L;PHB2;MUL1;BAX;TIMM17A;GBA1;CHCHD7;FIS1;TOMM40;PLD6;TMEM11;PPARGC1A;APEX1;OXA1L;BCAP31;TOMM20;DNAJC19;ATP7A;TIMM44;RAB29;MTFR1L;WDR81;TIMM50;CXADR;PRDX3;MIEF2;RHOT2;ATAD3A;BNIP3;TOMM34;IFIT2;CLUH;PINK1;NOA1;MIG…	LAMP5RELN
280	MSigDB_Hallmark_2020__Interferon Alpha Response	0.222884	1.81782	0.00967742	0.154289	1	26/78	14.97%	PLSCR1;USP18;IL4R;IFI44;DDX60;IFITM3;IFI44L;PSMB9;OAS1;LAMP3;IFIH1;TRIM5;RNF31;DHX58;SP110;PARP12;EPSTI1;TXNIP;CSF1;TRIM14;IFIT3;MX1;MVB12A;GMPR;STAT2;SAMD9	LAMP5RELN
281	GO_Biological_Process_2023__Epithelium Development (GO:0060429)	-0.252395	-1.817	0.00143885	0.102684	1	32/82	21.81%	KRT17;DNPH1;BMP2;KRT10;TAGLN2;FGFR2;AKR1C2;RCAN3;WNT7B;KDR;RHCG;MFSD2A;PAX8;SOX9;DLL1;SMO;ALDOC;MEOX1;PIH1D1;TST;PGK1;CPT1A;CBR1;SOX10;ALDH1A2;LOXL3;FUZ;VDAC1;DACT1;CDHR2;GSTK1;BDH2	LAMP5RELN
282	GO_Biological_Process_2023__Regulation Of Release Of Cytochrome C From Mitochondria (GO:0090199)	-0.355034	-1.81573	0.0048	0.102966	1	21/30	39.08%	TRIAP1;PRELID1;MOAP1;HRK;PPIF;PLAUR;MLLT11;BAX;NOL3;TP53;FXN;PSMD10;BAD;GHITM;BNIP3;PINK1;CLU;IGF1;PDCD5;BCL2L1;BID	LAMP5RELN
283	GO_Biological_Process_2023__Regulation Of MAPK Cascade (GO:0043408)	-0.211262	-1.81414	0.00282087	0.103488	1	47/152	18.11%	GPR37;VRK2;BMP2;LPAR1;PTPRC;GPR37L1;HRAS;ADRA1D;FGFR2;ADRB3;CD24;FGFR3;CAV3;PIK3R2;CD74;DUSP4;KDR;GSTP1;CARTPT;PDGFB;DUSP6;DUSP1;LBH;PPIA;ZNF622;GFRAL;PEBP1;CD81;GREM1;F2R;WDR54;THPO;SPRED3;DUSP9;CD4;DUSP7;LAMTOR1;PHB2;AVPI1;SOD1;SHC1;PDGFA;CX3CL1;ATP6AP2;LYN;TMEM106A;MYDGF	LAMP5RELN
284	GO_Biological_Process_2023__Adenylate Cyclase-Modulating G Protein-Coupled Receptor Signaling Pathway (GO:0007188)	-0.2421	-1.81089	0.00449102	0.10406	1	23/92	8.56%	RAMP2;GPR37;CORT;VIPR2;CALCR;LPAR1;GPR37L1;ADM;ADRA1D;HTR1F;ADRB3;GRM8;GPR171;GPR3;MCHR1;ADORA2B;ADGRG6;CALCB;MTNR1A;TSHR;TBXA2R;ADGRE5;OPRL1	LAMP5RELN
285	GO_Biological_Process_2023__Maturation Of SSU-rRNA (GO:0030490)	-0.328145	-1.80753	0.0049505	0.105342	1	24/36	40.47%	TSR3;RPS8;RPS16;RPS14;TSR1;TSR2;UTP3;DCAF13;RPS28;SNU13;WDR46;NOB1;SPPL2B;NOP14;NGDN;RPS19;RIOK1;MRPS11;WDR3;RIOK2;RRP36;HEATR1;NOL11;MPHOSPH10	LAMP5RELN
286	KEGG_2021_Human__AGE-RAGE signaling pathway in diabetic complications	0.21674	1.80713	0	0.157637	1	24/82	15.59%	NOX1;PLCG2;ICAM1;COL1A1;F3;NFATC1;MAPK11;JUN;AGT;STAT5A;CCND1;PLCD4;EDN1;PIM1;VEGFA;MAPK13;PLCB3;FOXO1;MAPK12;COL4A6;AKT1;TGFB1;TGFBR1;SMAD3	LAMP5RELN
287	GO_Molecular_Function_2023__G Protein-Coupled Receptor Activity (GO:0004930)	-0.221723	-1.78645	0.00449102	0.114542	1	35/116	13.89%	GPR37;VIPR2;NPY;LPAR1;HCRTR1;CX3CR1;GNRHR;LGR5;GPR37L1;NMUR1;OPN5;NTSR2;NPFFR2;GRM8;GPR34;S1PR1;GPR171;MCHR1;GPR156;ADORA2B;ADGRG6;MTNR1A;TSHR;GPR62;GPR183;ADGRE5;OPRL1;PAX8;GPR87;RXFP1;F2R;ADGRG1;ADGRE2;MCHR2;OPRM1	LAMP5RELN
288	GO_Biological_Process_2023__Regulation Of Defense Response (GO:0031347)	0.237615	1.77882	0.002849	0.170217	1	15/60	9.14%	CASP4;PIK3AP1;HERC5;ALOX5;ADAMTS12;USP18;HCK;NLRP1;BST1;NLRP2;TNC;PTPN22;DHX58;SBNO2;TNFSF4	LAMP5RELN
289	WikiPathway_2023_Human__Role Of Hypoxia Angiogenesis And FGF Pathway In OA Chondrocyte Hypertrophy WP5373	-0.297719	-1.77314	0.00906344	0.122885	1	16/42	18.34%	CCN2;FOS;FGFR2;COL10A1;FGFR3;FOSB;CNMD;CEBPB;KDR;SOX9;SPP1;RELB;FOSL2;LAMTOR1;FGFR4;JUNB	LAMP5RELN
290	GO_Biological_Process_2023__Calcium Ion Transport (GO:0006816)	0.210356	1.77273	0.00304878	0.17231	1	45/87	32.15%	TRPC6;CACNA2D4;CACNG6;ATP2A3;CACNG1;CDH23;KCNN4;TRPC4;RYR1;RYR3;CALCRL;CRACR2A;TRPV3;PSEN2;ATP2C2;CACNA1G;TRPM4;ORAI1;ATP2A1;SLC24A4;CHRNA7;CACNA2D1;GAS6;RAMP1;SLC24A2;ORAI2;P2RX4;CACNA1C;TRPC5;TRPM2;SLC8A2;RYR2;CACNG3;CAMK2A;ANO6;P2RX7;CACNB2;SLC8A1;PSEN1;ITPR1;CACNG8;CACNG7;STIM1;SLC8A3;CACNA1A	LAMP5RELN
291	GO_Biological_Process_2023__Vasculogenesis (GO:0001570)	-0.385689	-1.77268	0.00993377	0.122657	1	10/22	14.26%	RAMP2;TNNI3;HEY2;WNT7B;KDR;TGFBR2;ITGB8;ENG;AGGF1;RASIP1	LAMP5RELN
292	GO_Cellular_Component_2023__Endoplasmic Reticulum Lumen (GO:0005788)	-0.193406	-1.76555	0.00788436	0.127768	1	97/200	35.00%	VGF;ARSI;LGALS1;SELENOM;TSPO;COL4A5;ALB;COL9A2;HSPA5;C3;COL10A1;BDNF;MFGE8;COL9A3;ARSL;MANF;WNT7B;TSPAN15;COL5A3;TIMP1;SERPIND1;PDGFB;JMJD8;SPP1;COL16A1;FSTL3;ARSD;SGCG;TRDN;PLAUR;CASQ1;CST3;CALR;CHGB;TOR2A;IL12A;THBS1;ARSA;ERP29;CTSZ;CP;VWA1;PDGFA;B2M;PPIB;SLC27A2;COL8A1;F5;MYDGF;TMEM132A;ARSF;RCAN1;P4HA3;PDGFC;DNAJB11;COL6A2;MELTF;APOE;COL6A1;TOR1A;PNPLA2;PDGFD;CKAP4;CLN6;SPON1;FUCA2;ADAMTSL1;S…	LAMP5RELN
293	WikiPathway_2023_Human__Pluripotent Stem Cell Differentiation Pathway WP2848	0.32522	1.76488	0.00728155	0.178569	1	12/26	16.75%	HGF;NOTCH1;INHBA;CSF1R;EGF;GDF5;FGF10;VEGFA;CSF1;TGFB1;FGF2;WNT2B	LAMP5RELN
294	MSigDB_Hallmark_2020__Adipogenesis	-0.196226	-1.75019	0.00139082	0.137717	1	101/180	43.41%	COX6A1;ETFB;COX8A;UQCRQ;GPX4;DDT;ATP5PO;JAGN1;C3;CYC1;SNCG;UQCR11;MRAP;CHCHD10;DNAJB9;ECH1;UQCR10;CAT;RREB1;NDUFB7;IDH3G;OMD;ANGPTL4;COX7B;ENPP2;CAVIN2;VEGFB;LAMA4;NDUFS3;MYLK;MDH2;NDUFAB1;TST;SOWAHC;CD302;SOD1;UBC;GADD45A;TALDO1;CD151;ACAA2;ESYT1;DHRS7;DGAT1;PREB;UQCRC1;ARAF;APOE;SLC5A6;ITGA7;NKIRAS1;PFKL;SLC25A1;REEP5;PHLDB1;LIPE;FZD4;GHITM;RETSAT;ARL4A;SPARCL1;GBE1;COQ5;SSPN;CS;PPM1B;PRDX3;CRA…	LAMP5RELN
295	KEGG_2021_Human__Cytokine-cytokine receptor interaction	0.204033	1.74857	0.00307692	0.187558	1	33/91	18.89%	TNFRSF11A;INHBA;IL4R;IL33;GDF15;IFNLR1;OSMR;MSTN;CSF1R;BMP8A;ACVR1C;BMPR1B;IL2RB;IL5RA;GDF5;IL27RA;FAS;IL10RB;TNFSF4;AMH;CSF1;IL12RB2;IL17RE;IL20RB;TNFRSF19;INHA;TGFB1;TGFBR1;IL16;NGF;IL17RA;IL17RB;IFNAR2	LAMP5RELN
296	MSigDB_Hallmark_2020__Glycolysis	-0.199935	-1.74413	0.00412088	0.138587	1	103/168	46.82%	GMPPB;PGAM2;IER3;ABCB6;TPBG;TPI1;HSPA5;KDELR3;LDHA;CHST2;STMN1;DDIT4;GPC4;ADORA2B;B3GALT6;MET;IL13RA1;ANGPTL4;POLR3K;ENO1;HAX1;GPR87;SOX9;PRPS1;PPIA;SLC37A4;MIF;MPI;PGAM1;MDH2;FKBP4;G6PD;AURKA;PGK1;ENO2;PSMC4;SOD1;TALDO1;SLC16A3;NT5E;ANKZF1;NOL3;AKR1A1;CITED2;CHST1;B4GALT2;EFNA3;GALE;GMPPA;MDH1;GALK1;GOT1;CHPF;CLN6;B3GAT3;PKM;SDC2;PFKFB1;CENPA;B4GALT7;GLRX;TGFA;GNPDA1;IGFBP3;CHPF2;DPYSL4;TXN;CYB5…	LAMP5RELN
297	GO_Biological_Process_2023__Enzyme-Linked Receptor Protein Signaling Pathway (GO:0007167)	0.207212	1.73283	0.00668896	0.196606	1	23/88	12.47%	SYK;CD8A;AXL;ERBB3;FLT1;FLT3;BLNK;PTPRU;HCK;GUCY2C;CSF1R;PDGFRB;CASS4;GUCA1B;ERBB2;CSF1;GP6;JAK3;MERTK;TEK;GFRA2;CNKSR1;LCP2	LAMP5RELN
298	GO_Biological_Process_2023__Positive Regulation Of Epithelial Cell Migration (GO:0010634)	0.203822	1.73008	0.0060241	0.196623	1	26/79	19.13%	PLCG2;PIK3CG;ATOH8;SMOC2;RRAS;HYAL1;AGT;ANGPT1;PRKD2;EGF;EDN1;FGF10;VEGFA;NELL1;PTK2B;TEK;ETS1;CTSH;AKT1;FGF2;PDCD6;PPM1F;PLPP3;BCAR1;PRKD1;PIK3CD	LAMP5RELN
299	GO_Biological_Process_2023__Positive Regulation Of MAPK Cascade (GO:0043410)	-0.188977	-1.72384	0.00268097	0.152262	1	67/197	22.71%	GPR37;CALCR;BMP2;LPAR1;PTPRC;MUSK;CCN2;CIB1;GPR37L1;HRAS;DDT;ADRA1D;FGFR2;ADRB3;CD24;FGFR3;PHB1;CD74;KDR;CARTPT;GPR183;TNFSF11;PDGFB;GLIPR2;PRXL2C;PPIA;ALKAL1;ZNF622;GFRAL;CD81;F2R;FGF1;ROR1;THPO;CD4;MST1R;OPRM1;LAMTOR1;PHB2;SEMA7A;AVPI1;THBS1;SOD1;ERP29;HTR2B;SCIMP;ARL6IP5;FGFR4;SHC1;HTR2A;ADAM8;PDGFA;CX3CL1;TMEM106A;MYDGF;DDR1;CXCL17;PDGFC;ROBO1;MT3;DIRAS1;APOE;DOK4;TRAF7;HTR2C;SPRY2;PDGFD	LAMP5RELN
300	KEGG_2021_Human__Calcium signaling pathway	0.164094	1.71885	0.00384615	0.203887	1	84/186	30.67%	HGF;PTGFR;PLCG2;NTSR1;PTGER3;PTAFR;DRD5;ITPR3;NOS2;ERBB3;FLT1;OXTR;CYSLTR1;ATP2A3;PHKA1;HTR4;CD38;CHRM2;PDGFRB;EGF;ADCY7;PLCD4;ADCY8;SLC25A31;GNA14;P2RX6;FGF10;FGF18;ERBB2;FGF20;RYR1;VEGFA;PLCB3;RYR3;FGF17;GRM1;EDNRA;PTK2B;CACNA1G;ORAI1;ITPKB;ATP2A1;MYLK4;CAMK4;TNNC2;FGF2;EDNRB;CHRNA7;NGF;TPCN2;GRIN2D;HTR5A;CHRM3;CHRM5;ITPKC;ORAI2;P2RX4;CACNA1C;GNA11;SLC8A2;CACNA1I;RYR2;VEGFD;PHKA2;TPCN1;ADCY3;PL…	LAMP5RELN
301	WikiPathway_2023_Human__Adipogenesis WP236	0.203444	1.71501	0.00955414	0.207079	1	32/96	18.74%	EBF1;RARA;GADD45B;IRS4;AGT;STAT5A;ASIP;PCK2;PLIN2;FAS;PNPLA3;SCD;BMP1;CFD;AGPAT2;EPAS1;FOXO1;WWTR1;LPL;TGFB1;RXRA;STAT2;DVL1;NR1H3;SMAD3;PPARA;KLF7;WNT5B;SP1;BSCL2;NCOR2;TRIB3	LAMP5RELN
302	WikiPathway_2023_Human__Angiopoietin Like Protein 8 Regulatory Pathway WP3915	0.183793	1.71099	0.00684932	0.205284	1	86/117	49.96%	PIK3CG;IRS4;MAPK11;CBLC;MLXIPL;ABCG8;SCD;MAPK13;SLCO1C1;FOXO1;MAPK12;DIO2;AKT1;LPL;RXRA;RPS6KA5;NR1H3;GYS1;FASN;SLC2A1;PIK3CD;TSC2;FLOT2;SHC2;IRS1;SREBF2;CBLB;PRKAB2;INSR;MINK1;CRK;RHOQ;MAP3K3;MAP3K12;PRKAG2;THRB;AKT2;PIK3R4;RPS6KA2;PIK3R1;MAP3K5;MAPK14;MAPK4;PIK3C2A;CBL;RPS6KB1;PTPN1;SOS2;MAPK9;PIK3CB;SESN3;PIK3C3;TSC1;MTOR;RPTOR;MAP3K4;MAP4K3;MAPK1;RPS6KA6;PIK3CA;MAP2K5;SOS1;MAPK10;MAP3K13;FOXO…	LAMP5RELN
303	GO_Biological_Process_2023__Regulation Of Peptidyl-Tyrosine Phosphorylation (GO:0050730)	0.218169	1.7015	0.0084507	0.206906	1	18/63	13.62%	BANK1;HGF;PLCG2;ITGA5;SAMSN1;CD44;BST1;AGT;ANGPT1;PECAM1;PTPN6;FGF10;VEGFA;AMH;NELL1;PTK2B;RAP2B;TGFB1	LAMP5RELN
304	GO_Biological_Process_2023__Sensory Perception Of Sound (GO:0007605)	0.221377	1.7011	0.00298507	0.206197	1	23/62	20.06%	COL1A1;HPN;TMC1;CDC14A;EYA1;MYO3A;LOXHD1;ATP6V0A4;TMC2;COL11A1;CDH23;SLC26A4;KCNQ1;COL11A2;TBL1X;WFS1;LHFPL3;DCDC2;MYO3B;USH2A;SERPINB6;MYH7B;GRM7	LAMP5RELN
305	GO_Molecular_Function_2023__Calcium Ion Binding (GO:0005509)	0.152383	1.69427	0	0.211267	1	52/218	14.09%	PLSCR4;SMOC2;PLSCR1;NOTCH4;FBLN1;ANXA13;SCIN;CDH9;CDH17;PLA2G10;ITGA5;ASAH2;MYOF;PLA2G4A;COLEC11;RCVRN;S100Z;ANXA11;C1R;ENPP1;S100A13;MCTP2;SLIT1;CDH22;LOXL2;PCDHA4;CDH23;LCP1;GUCA1B;PCDHB6;HPGDS;RYR1;SYT17;CDH3;SLIT2;ADGRV1;SYT15;CRACR2A;DSC2;CIB2;CDH12;ESYT3;SYT2;FKBP9;ANXA5;TRPM4;AGRN;ATP2A1;CDH4;CIB4;FER1L5;EFCAB11	LAMP5RELN
306	GO_Biological_Process_2023__Inorganic Cation Import Across Plasma Membrane (GO:0098659)	0.203839	1.68131	0.00284091	0.211036	1	31/79	24.11%	AQP8;SLC9C1;SLC12A3;SCN9A;SLC5A2;FXYD2;SCNN1G;SLC39A12;SCN7A;SLC9C2;KCNE2;SLC39A8;HCN4;KCNJ14;TRPV3;CACNA1G;ATP1A2;TRPM4;SLC12A1;SLC24A4;SCN11A;KCNH2;CACNA2D1;SLC9A5;KCNJ12;SLC24A2;CACNA1C;SLC8A2;CACNA1I;SLC9A7;SLC9A1	LAMP5RELN
307	GO_Biological_Process_2023__Positive Regulation Of Intracellular Signal Transduction (GO:1902533)	-0.161481	-1.66283	0.00121803	0.195145	1	133/386	26.26%	POMC;GPR37;RELN;CD86;LGALS1;CALCR;BMP2;IL18;LPAR1;PTPRC;MUSK;CX3CR1;SOX11;FADD;LRP2;GPR37L1;TCIM;SLC35B2;HRAS;C1QTNF4;ADRA1D;FGFR2;IFI35;RFPL1;PARK7;ADRB3;GAPDH;FGFR3;PIM2;RRAGA;LAMTOR2;PHB1;AKR1C2;CD74;RPS15;KDR;GPR62;CARTPT;SEMA3E;PLXNB1;TNFSF11;C1QBP;S100B;PDGFB;RPL17;HAX1;P2RX5;JMJD8;SOX9;DDIT3;PPIA;ENG;NEUROD2;ZNF622;GFRAL;CD81;BOK;TSPAN6;BCL10;LAMTOR5;F2R;FGF1;ROR1;WDR24;THPO;CD4;MST1R;LAMT…	LAMP5RELN
308	GO_Biological_Process_2023__Positive Regulation Of Macromolecule Metabolic Process (GO:0010604)	0.147052	1.65158	0	0.218147	1	72/243	20.35%	PLCG2;NTSR1;GJA1;SCX;TLR2;PLSCR1;NOTCH1;INHBA;PLA2G10;HPN;IL33;VSIR;MAPK11;MSN;AGT;MED26;ANGPT1;NWD1;TNC;LAMP3;EGF;FER1L6;BMPR1B;EPHX2;CUX2;ACTA2;SLC11A1;RIGI;C1QTNF1;PTPN22;FGF10;FGF18;YAP1;FGF20;VEGFA;AMH;CDH3;DTX3L;CSF1;FGF17;RHOXF1;WNT3;OCLN;ETS1;EZR;CTSH;WFS1;PDE2A;AKT1;POU3F1;TGFB1;ADAM19;TGFBR1;FGF2;NR1H3;SMAD3;CHRNA7;LRP3;NGF;BRCA1;ZPR1;PPM1F;GAS6;DNMT3B;ANKRD31;MYOM1;PIK3CD;RNF207;HDAC1;…	LAMP5RELN
309	GO_Cellular_Component_2023__Cell-Cell Junction (GO:0005911)	0.14457	1.64853	0	0.21957	1	95/237	29.72%	CD53;GJA1;NIBAN2;GJB6;GJC1;NOTCH1;CDH9;CDH17;ITGA5;HPN;NPHS1;BAIAP2L1;MSN;PTPRU;PTPRK;ESAM;PDLIM3;LLGL2;SHROOM3;PECAM1;GAB1;ECT2;AHNAK;FAT2;TMEM47;CDH22;PDLIM2;PTK7;PCDH1;FOXM1;TRPC4;VEGFA;CDH3;CHAF1B;DSC2;JUP;SMAD7;CDH12;PDLIM5;RND1;TEK;B4GALT1;OCLN;CNKSR1;FLNA;RAP2B;EZR;ADGRB1;CLDN4;CDH4;MPP3;CCDC85C;PXN;WTIP;NDRG1;ARVCF;TNKS1BP1;PARD6B;PAK4;PLPP3;PARD6G;JAM3;FLCN;DLG4;FLOT2;NF2;CDH26;CLIC4;JAG…	LAMP5RELN
310	GO_Biological_Process_2023__Potassium Ion Transport (GO:0006813)	0.191191	1.64594	0.00330033	0.221578	1	38/96	24.11%	HPN;SLC9C1;KCNK13;KCNK2;SLC1A3;KCNH4;SLC9C2;KCNE2;HCN4;KCNK10;KCNN4;KCNG3;HCN3;KCNQ1;KCNA4;KCNA6;KCNH3;ATP1A2;KCNN1;KCNMB3;KCNG2;SLC24A4;KCNN3;KCNC4;KCNH2;KCNH5;LRRC55;KCNK6;SLC9A5;KCNC3;KCNB2;KCNJ12;SLC24A2;KCNQ4;KCNQ5;KCNQ2;SLC9A7;SLC9A1	LAMP5RELN
311	GO_Cellular_Component_2023__Cilium (GO:0005929)	0.15264	1.64126	0.00380228	0.225898	1	95/208	33.25%	NPFFR1;ALPK1;DRD2;RSPH9;DRD5;TTLL9;GPR157;EVC;UBXN10;CFAP47;GLI2;HAVCR1;TTLL6;CFAP300;RSPH4A;DNAH11;BBS1;PKHD1;DNAH5;ROPN1L;DYNC2I2;RAB8A;CFAP91;DNAH7;DNAH2;DYNLRB2;TULP3;CFAP126;RILPL2;BBS5;TTC23;TMEM216;IFT140;CCDC40;GPR161;CATSPERG;CAMSAP3;DCDC2;CFAP251;IFT122;TBC1D30;KIF7;DNAI1;DNAH9;IQUB;TMEM231;MNS1;SORD;RP2;RSPH1;FLCN;CFAP61;DNAAF5;TMEM138;TOGARAM2;SHANK3;SEPTIN9;PTCH1;CABYR;RSPH3;NPHP1;TT…	LAMP5RELN
312	GO_Cellular_Component_2023__Secretory Granule Lumen (GO:0034774)	-0.173539	-1.59424	0.00924703	0.248638	1	97/217	34.66%	POMC;APRT;DOCK2;TRAPPC1;ALB;GMFG;PCSK1;C3;HSPA8;HEBP2;PADI2;CSTB;F13A1;TUBB2A;GHDC;SPARC;GRN;CAT;MAGED2;TIMP1;TMSB4X;GSTP1;PDGFB;FABP5;ITIH4;FTL;PRDX4;VEGFB;SELENOP;PPIA;SRP14;ALDOC;SERPINB1;TUBB4B;CSNK2B;PGLYRP1;SGCG;PGAM1;NAPRT;NEU1;THBS1;ARSA;HSP90AB1;EEF2;CTSZ;AMPD3;PSMC3;PDGFA;B2M;LGALS3BP;F5;HSP90AA1;TEX264;DNASE1L1;CTSA;STK11IP;PSMD2;ECM1;PRDX6;EEF1A1;NPC2;IMPDH1;ILF2;CTSD;CANT1;PTGES2;GSN…	LAMP5RELN
313	KEGG_2021_Human__Cell adhesion molecules	0.184989	1.59125	0.00925926	0.257517	1	25/92	14.58%	CD58;CD8A;SDC4;ICAM1;ITGA8;HLA-E;ITGAM;VSIR;CD274;ESAM;CLDN15;PECAM1;SIGLEC1;CLDN18;CDH3;HLA-F;SDC3;HLA-DMA;OCLN;ITGA9;NTNG2;CLDN4;CDH4;PTPRF;HLA-DPB1	LAMP5RELN
314	GO_Biological_Process_2023__Cellular Response To Oxygen-Containing Compound (GO:1901701)	0.139758	1.58901	0	0.256166	1	71/281	16.45%	ZFP36;PLCG2;RARA;TLR2;ZFP36L1;AXL;DRD5;SLC13A5;AQP8;RAPGEF3;CD274;JUN;PTPRK;CASP7;GLRA1;ADCY7;ECT2;HCN4;RASA4;ADCY8;NR1H4;ACER1;PTK7;LCP1;LY96;SLC26A6;HCN3;KCNQ1;RYR1;CPNE9;SBNO2;BRINP3;SYT17;TNFSF4;RYR3;GLRA2;SLIT2;ADGRV1;SYT15;CIB2;RORB;PTK2B;FOXO1;CACTIN;SYT2;AKR1C3;VIM;CFTR;SLC26A3;INPP5K;WNT3;SPAAR;TNIP1;EZR;ITPKB;PDE2A;P2RY12;AKT1;CCDC62;ESR1;CPNE7;ZNF16;CDKN2AIP;CPNE4;PXN;PEX10;NR1H3;CPNE8…	LAMP5RELN
315	WikiPathway_2023_Human__PI3K Akt Signaling Pathway WP4172	0.143504	1.5879	0.00440529	0.255391	1	67/240	19.62%	HGF;MYB;SYK;PIK3AP1;PIK3CG;PIK3R5;TLR2;ITGB4;COL1A1;ITGA8;COL9A1;LPAR2;IL4R;ITGA5;OSMR;FLT1;FLT3;LAMA2;SGK2;ANGPT1;CSF1R;CHRM2;GNG11;ITGA1;TNC;LAMB4;PDGFRB;EGF;CCND1;TNXB;IL2RB;PCK2;LAMC3;ITGA2B;CCND3;FGF10;FGF18;EFNA2;FGF20;VEGFA;VWF;LAMA3;CSF1;FGF17;JAK3;ITGA10;TEK;COL4A6;ITGA9;AKT1;LAMA5;FGF2;GNB3;GYS1;THBS3;NGF;SGK3;EIF4E1B;BRCA1;MCL1;LAMB1;STK11;IFNAR2;BCL2L11;PIK3CD;TSC2;ITGA6	LAMP5RELN
316	KEGG_2021_Human__PI3K-Akt signaling pathway	0.140632	1.58387	0.00431034	0.254338	1	70/252	19.62%	HGF;MYB;SYK;PIK3AP1;PIK3CG;PIK3R5;TLR2;ITGB4;COL1A1;ITGA8;COL9A1;LPAR2;IL4R;ITGA5;ERBB3;OSMR;FLT1;FLT3;LAMA2;SGK2;ANGPT1;CSF1R;CHRM2;GNG11;ITGA1;TNC;LAMB4;PDGFRB;EGF;CCND1;TNXB;IL2RB;PCK2;LAMC3;ITGA2B;CCND3;FGF10;FGF18;ERBB2;EFNA2;FGF20;VEGFA;VWF;LAMA3;CSF1;FGF17;JAK3;ITGA10;TEK;COL4A6;ITGA9;AKT1;RXRA;LAMA5;FGF2;GNB3;GYS1;THBS3;NGF;SGK3;EIF4E1B;BRCA1;MCL1;LAMB1;STK11;IFNAR2;BCL2L11;PIK3CD;TSC2;IT…	LAMP5RELN
317	WikiPathway_2023_Human__Pleural Mesothelioma WP5087	0.125164	1.50123	0.00505051	0.306975	1	92/339	20.44%	HGF;PIK3CG;CSNK2A3;ITGB4;CDH24;CDH9;NOTUM;CDH17;ITPR3;FZD8;CD44;FLT1;WNT4;TCF7L1;LRP5;FLT3;CD274;JUN;LAMA2;CER1;ANGPT1;CSF1R;BTC;ADAMTS1;ITGA1;PDGFRB;EGF;CCND1;ACTA2;CDH22;LIN28B;LAMC3;CCND3;FOXM1;CTHRC1;FGF10;FGF18;EFNA2;BBC3;YAP1;FGF20;VEGFA;LAMA3;CDH3;HBEGF;CSF1;FGF17;CDH12;PODXL;FOXO1;PAK6;TEK;WNT3;COL4A6;BAK1;RASSF1;WWTR1;AKT1;CDH4;TGFB1;LAMA5;FGF2;DVL1;RPS6KA5;WIF1;RASSF5;TCF7L2;AMOT;NDRG1;…	LAMP5RELN
318	KEGG_2021_Human__Pathways in cancer	0.118235	1.45704	0	0.340521	1	89/400	15.86%	HGF;PLCG2;PTGER3;BRCA2;RARA;GADD45B;NOTCH4;NOTCH1;LPAR2;EGLN2;IL4R;NOS2;FZD8;WNT4;GLI2;TCF7L1;LRP5;FLT3;JUN;RAD51;LAMA2;DDB2;CASP7;AGT;STAT5A;CSF1R;RUNX1;GNG11;LAMB4;PDGFRB;EGF;ADCY7;CCND1;EDN1;IL2RB;MECOM;IL5RA;ADCY8;DAPK2;LAMC3;GSTM5;ITGA2B;CCND3;PIM1;FGF10;FGF18;FAS;ERBB2;BBC3;FGF20;VEGFA;LAMA3;PLCB3;RAC2;JUP;FGF17;IL12RB2;EDNRA;EPAS1;FOXO1;JAK3;PML;WNT3;COL4A6;BAK1;ETS1;RASSF1;GSTM2;AKT1;TGFB…	LAMP5RELN
319	KEGG_2021_Human__Ribosome	-0.526422	-4.13785	0	0	0	106/129	35.04%	MRPL36;RPL7A;MRPL34;MRPL28;RPL19;MRPS17;RPS26;RPS27A;MRPL12;RPL18A;RPL13A;RPS15;RPS18;RPL10A;MRPS12;RPL10;RPL12;RPS10;RPS4X;RPS17;RPS16;RPS25;RPL36AL;FAU;RPL41;RPS12;RPL29;RPL21;RPL8;RPL3;RPS9;MRPL27;RPL35;MRPL10;RPS21;RPS2;RPL6;RPL36;RPLP0;RPL7;RPL13;MRPL17;RPL26;MRPL23;RPLP1;RPS28;RPS11;RPL22L1;RPL24;RPL11;RPL32;MRPL21;RPS3A;RPL28;RPS7;RPL18;RPS27;RPL26L1;RPL9;UBA52;RPLP2;MRPL11;RPL27;RPS13;MRP…	SST
320	GO_Biological_Process_2023__Cytoplasmic Translation (GO:0002181)	-0.567206	-4.10127	0	0	0	81/92	35.21%	RPL7A;RPL19;RPS26;RPS27A;RPL18A;RPL13A;RPS15;RPS18;RPL10A;MRPS12;RPL10;RPL12;RPS10;RPS4X;RPS17;RPS16;RPS25;RPL36AL;FAU;RPL41;RPL29;RPL21;EIF4A1;RPL8;RPL3;RPS9;RPL35;RPS21;RPS2;RPL6;RPL36;RPLP0;RPL7;RPL13;RPL26;RPLP1;RPS28;RPS11;RPL22L1;RPL24;RPL11;RPL32;RPS3A;RPL28;RPS7;RPL18;RPS27;RPL26L1;RPL9;UBA52;RPLP2;RPL27;RPS13;FTSJ1;RPS8;EIF3I;RPS14;RPL23A;RPL15;RPS19;RPL27A;RPS23;RPL35A;RPS6;RPS5;RPL14;E…	SST
321	WikiPathway_2023_Human__Cytoplasmic Ribosomal Proteins WP477	-0.556122	-3.9088	0	0	0	75/87	35.04%	RPL7A;RPL19;RPS26;RPS27A;RPL18A;RPL13A;RPS15;RPS18;RPL10A;RPL10;RPL12;RPS10;RPS4X;RPS17;RPS16;RPS25;FAU;RPL41;RPS12;RPL29;RPL21;RPL8;RPL3;RPS9;RPL35;RPS21;RPS2;RPL6;RPL36;RPLP0;RPL7;RPL13;RPL26;RPLP1;RPS28;RPS11;RPL24;RPL11;RPL32;RPS3A;RPL28;RPS7;RPL18;RPS27;RPL9;UBA52;RPLP2;RPL27;RPS13;RPS8;RPS14;RPL23A;RPL15;RPL23;RPS19;RPL27A;RPS4Y1;RPS23;RPL35A;RPL36A;RPS6;RPS5;RPL14;RPL39;RPL38;RPSA;RPS15A;R…	SST
322	GO_Biological_Process_2023__Peptide Biosynthetic Process (GO:0043043)	-0.447169	-3.56779	0	0	0	103/145	33.59%	MRPL36;RPL7A;MRPL34;CARNS1;MRPL28;RPL19;MRPS17;RPS26;RPS27A;MRPL12;RPL18A;RPL13A;RPS15;RPS18;RPL10A;MRPS12;RPL10;RPL12;RPS10;RPS4X;RPS17;RPS16;RPS25;RPL36AL;FAU;MRPL51;RPL41;DHPS;MRPL55;RPL29;RPL21;RPL8;RPL3;PCSK1;RPS9;MRPL27;RPL35;MRPL10;RPS21;RPS2;RPL6;RPL36;RPLP0;RPL7;RPL13;RPL26;MRPL23;RPLP1;RPS28;RPS11;RPL24;RPL11;RPL32;GSPT2;RPS3A;RPL28;RPS7;RPL18;RPS27;RPL9;RPLP2;MRPL11;RPL27;MRPS33;RPS13;…	SST
323	GO_Biological_Process_2023__Translation (GO:0006412)	-0.405085	-3.55162	0	0	0	171/225	43.74%	MRPL54;MRPL36;MRPL53;RPL7A;NDUFA7;MRPL34;GADD45GIP1;MRPL28;RPL19;MRPS34;MRPS17;RPS26;RPS27A;EIF5A;MRPS28;MRPL12;RPL18A;RPL13A;RPS15;CHCHD1;RPS18;RPL10A;MRPS12;RPL10;RPL12;RPS10;RPS4X;AURKAIP1;RPS17;RPS16;RPS25;RPL36AL;EEF1B2;FAU;TUFM;MRPL51;RPL41;DHPS;MRPL55;RPL29;RPL21;RPL8;RPL3;RPS9;MRPL27;RPL35;MRPL10;RPS21;RPS2;APEH;RPL6;RPL36;RPLP0;RPL7;RPL13;MRPL17;RPL26;MRPL23;MRPS24;RPLP1;RPS28;MARS2;RPS1…	SST
324	GO_Biological_Process_2023__Aerobic Electron Transport Chain (GO:0019646)	-0.522791	-3.39562	0	0	0	56/64	40.66%	UQCC3;NDUFB10;NDUFB8;NDUFA2;NDUFA7;COX4I1;COX8A;COX7C;NDUFA6;NDUFS3;CYC1;NDUFS7;COX6A1;NDUFC2;NDUFB7;COX5B;SDHD;NDUFA4;UQCR11;UQCRQ;UQCR10;COX6B1;NDUFB2;UQCRHL;NDUFA3;COX7A2;SDHAF2;NDUFB3;NDUFS8;UQCRB;CYCS;NDUFA1;NDUFS5;NDUFS6;NDUFAB1;UQCRFS1;COX5A;COX7B;SLC25A51;NDUFB5;UQCRH;NDUFV1;NDUFV2;NDUFA8;UQCRC1;NDUFC1;NDUFB9;COX15;SDHA;NDUFA9;COX6C;NDUFB4;NDUFB1;NDUFA5;NDUFS2;NDUFAF1	SST
325	GO_Biological_Process_2023__Macromolecule Biosynthetic Process (GO:0009059)	-0.410047	-3.37642	0	0	0	136/171	43.74%	MRPL36;RPL7A;MRPL34;MRPL28;RPL19;MRPS17;RPS26;RPS27A;EIF5A;MRPL12;RPL18A;RPL13A;RPS15;RPS18;RPL10A;MRPS12;RPL10;RPL12;RPS10;RPS4X;RPS17;RPS16;RPS25;RPL36AL;EEF1B2;FAU;TUFM;MRPL51;RPL41;DHPS;MRPL55;RPL29;RPL21;RPL8;APOE;RPL3;RPS9;MRPL27;RPL35;MRPL10;TYMS;RPS21;B4GAT1;RPS2;RPL6;RPL36;RPLP0;RPL7;RPL13;RPL26;MRPL23;RPLP1;RPS28;RPS11;RPL24;RPL11;RPL32;GSPT2;RPS3A;RPL28;GAL3ST2;RPS7;RPL18;RPS27;RPL9;RP…	SST
326	WikiPathway_2023_Human__Electron Transport Chain OXPHOS System In Mitochondria WP111	-0.479506	-3.37526	0	0	0	72/88	40.50%	NDUFA13;NDUFB10;NDUFB8;NDUFA2;NDUFA7;COX4I1;ATP5F1D;ATP5MC1;COX8A;COX7C;NDUFA11;NDUFA6;COX7A1;NDUFS3;SLC25A5;NDUFS7;ATP5MF;COX6A1;NDUFC2;NDUFB7;COX5B;SDHD;NDUFA4;UQCR11;UQCRQ;ATP5ME;UQCR10;COX6B1;ATP5PO;SURF1;NDUFB2;ATP5PF;NDUFA3;ATP5MC3;COX7A2;NDUFB3;ATP5IF1;NDUFS8;UQCRB;NDUFA1;NDUFS5;ATP5F1B;ATP5PD;NDUFS6;NDUFAB1;UQCRFS1;COX5A;COX7B;NDUFB5;UQCRH;NDUFV1;NDUFV2;ATP5F1E;NDUFA8;UQCRC1;COX17;SLC25A4…	SST
327	GO_Biological_Process_2023__Mitochondrial ATP Synthesis Coupled Electron Transport (GO:0042775)	-0.517518	-3.35565	0	0	0	58/66	41.36%	UQCC3;NDUFB10;NDUFB8;NDUFA2;NDUFA7;COX4I1;COX8A;COX7C;NDUFA6;NDUFS3;CYC1;NDUFS7;COX6A1;NDUFC2;NDUFB7;COX5B;SDHD;NDUFA4;UQCR11;UQCRQ;UQCR10;COX6B1;NDUFB2;UQCRHL;NDUFA3;COX7A2;SDHAF2;NDUFB3;NDUFS8;UQCRB;CYCS;NDUFA1;NDUFS5;NDUFS6;NDUFAB1;UQCRFS1;COX5A;COX7B;NDUFB5;UQCRH;NDUFV1;NDUFV2;NDUFA8;UQCRC1;NDUFC1;NDUFB9;COX15;NDUFA12;COA6;SDHA;NDUFA9;COX6C;NDUFB4;NDUFB1;NDUFA5;NDUFS2;NDUFAF1;TAFAZZIN	SST
328	GO_Cellular_Component_2023__Cytosolic Large Ribosomal Subunit (GO:0022625)	-0.571603	-3.34824	0	0	0	43/48	34.53%	RPL7A;RPL19;RPL18A;RPL13A;RPL10A;RPL12;RPL36AL;RPL41;RPL29;RPL21;RPL8;RPL3;RPL35;RPL6;RPL36;RPLP0;RPL7;RPL13;RPL26;RPLP1;RPL24;RPL11;RPL32;RPL28;RPL18;RPL26L1;RPL9;UBA52;RPLP2;RPL27;RPL23A;RPL15;RPL27A;RPL35A;RPL14;RPL39;RPL38;RPL4;RPL5;RPL17;RPL34;RPL7L1;RPL30	SST
329	GO_Cellular_Component_2023__Large Ribosomal Subunit (GO:0015934)	-0.571603	-3.34824	0	0	0	43/48	34.53%	RPL7A;RPL19;RPL18A;RPL13A;RPL10A;RPL12;RPL36AL;RPL41;RPL29;RPL21;RPL8;RPL3;RPL35;RPL6;RPL36;RPLP0;RPL7;RPL13;RPL26;RPLP1;RPL24;RPL11;RPL32;RPL28;RPL18;RPL26L1;RPL9;UBA52;RPLP2;RPL27;RPL23A;RPL15;RPL27A;RPL35A;RPL14;RPL39;RPL38;RPL4;RPL5;RPL17;RPL34;RPL7L1;RPL30	SST
330	MSigDB_Hallmark_2020__Epithelial Mesenchymal Transition	0.339414	3.32587	0	0	0	80/172	17.06%	CCN1;COL1A2;POSTN;SERPINH1;FAP;SDC4;CXCL12;TNC;TNFAIP3;TGM2;CD44;NID2;TIMP1;FZD8;COL5A1;PDLIM4;INHBA;LOX;LOXL1;FBN2;COL11A1;NOTCH2;COL12A1;FBLN5;GEM;TGFBI;PDGFRB;ADAM12;CDH6;GJA1;ANPEP;LAMA3;BDNF;ABI3BP;IGFBP3;COL4A1;PMP22;ITGAV;COL16A1;ELN;COL4A2;ITGA2;BMP1;GADD45B;THBS1;LAMC2;ID2;IL15;LAMA2;SGCG;EDIL3;VIM;SLIT3;FAS;LOXL2;SERPINE2;COL7A1;FERMT2;SPP1;NNMT;EMP3;FBLN2;MATN2;TGFBR3;SDC1;WIPF1;OXTR;L…	SST
331	GO_Biological_Process_2023__Mitochondrial Respiratory Chain Complex Assembly (GO:0033108)	-0.459811	-3.26764	0	0	0	74/87	45.68%	UQCC3;COX14;NDUFA13;NDUFB10;NDUFB8;PET117;SCO2;NDUFAF3;NDUFA2;BCS1L;NDUFB11;COA3;NDUFA11;NDUFA6;NDUFS3;NDUFS7;NDUFC2;NDUFB7;SDHAF1;SURF1;NDUFB2;NDUFA3;TMEM126A;CHCHD4;PET100;NDUFAF8;COA8;SDHAF2;NDUFB3;NDUFS8;NDUFA1;NDUFS5;FOXRED1;NDUFAB1;UQCRFS1;COX16;DMAC2;NDUFB5;OMA1;COX20;UQCC2;NDUFA8;COX17;TMEM186;NDUFC1;CHCHD7;NDUFB9;FASTKD3;NDUFAF4;DMAC1;TIMM21;COA5;SMIM20;OXA1L;NDUFA9;TMEM223;NDUFB4;NDUFB1…	SST
332	GO_Biological_Process_2023__Collagen Fibril Organization (GO:0030199)	0.538605	3.24328	0	0	0	21/36	11.08%	COL1A2;SERPINH1;LOXL4;COL5A1;ADAMTS2;LOX;LOXL1;COL11A1;COL12A1;COL27A1;SERPINF2;PXDN;TLL1;CYP1B1;BMP1;ADAMTS3;TGFBR1;LOXL2;COL11A2;SCX;TGFB2	SST
333	GO_Cellular_Component_2023__Small Ribosomal Subunit (GO:0015935)	-0.577962	-3.2138	0	0	0	33/38	32.77%	RPS26;RPS27A;RPS15;RPS18;MRPS12;RPS10;RPS4X;RPS17;RPS16;RPS25;FAU;RPS9;RPS21;RPS2;RPS28;RPS11;RPS3A;RPS7;RPS27;UBA52;RPS13;RPS8;RPS14;RPS19;RPS4Y1;RPS23;RPS6;RPS5;RPSA;RPS15A;MRPS6;RACK1;RPS20	SST
334	GO_Biological_Process_2023__Proton Motive Force-Driven ATP Synthesis (GO:0015986)	-0.50409	-3.17695	0	0	0	50/59	40.50%	NDUFA13;NDUFB10;NDUFB8;NDUFA2;NDUFA7;ATP5F1D;ATP5MGL;NDUFB11;ATP5MC1;NDUFA11;NDUFA6;NDUFS3;NDUFS7;ATP5MF;NDUFC2;NDUFB7;SDHD;ATP5ME;ATP5MJ;ATP5PO;NDUFB2;ATP5PF;NDUFA3;ATP5MC3;NDUFB3;NDUFS8;NDUFA1;NDUFS5;ATP5F1B;ATP5PD;NDUFS6;NDUFAB1;NDUFB5;NDUFV1;NDUFV2;ATP5F1E;NDUFA8;NDUFC1;ATP5MK;NDUFB9;ATP5PB;NDUFA12;SDHA;ATP5MG;NDUFA9;NDUFB4;NDUFB1;ATP5MC2;NDUFA5;NDUFS2	SST
335	WikiPathway_2023_Human__Oxidative Phosphorylation WP623	-0.530772	-3.16955	0	0	0	45/51	40.50%	NDUFB10;NDUFB8;NDUFA4L2;NDUFA2;NDUFA7;ATP5F1D;ATP5MC1;NDUFA11;NDUFA6;NDUFS3;NDUFS7;ATP5MF;NDUFC2;NDUFB7;NDUFA4;ATP5ME;ATP5PO;NDUFB2;ATP5PF;NDUFA3;ATP5MC3;NDUFS8;NDUFS5;ATP5F1B;ATP5PD;NDUFS6;NDUFAB1;NDUFB5;NDUFV1;NDUFV2;ATP5F1E;NDUFA8;NDUFC1;NDUFB9;ATP6AP1;ATP6AP2;ATP5PB;ATP5F1A;ATP5MG;NDUFA9;NDUFB4;NDUFB1;ATP5MC2;NDUFA5;NDUFS2	SST
336	GO_Cellular_Component_2023__Ribosome (GO:0005840)	-0.508507	-3.15849	0	0	0	40/57	30.05%	RPL7A;RPL19;RPS26;RPL18A;RPL13A;RPS18;RPL10A;MRPS12;RPS10;RPS4X;RPS17;RPS25;RPL36AL;RPL41;RPL8;RPS9;RPS21;RPL6;RPL36;RPS28;RPS11;RPL24;RPL11;RPL32;RPS7;RPL18;RPS27;RPL9;RPL27;RPS13;MRPS7;RPL15;RPS19;BTF3;RPS23;RPS5;RRBP1;RPL39;RPL38;RPL17	SST
337	GO_Cellular_Component_2023__Cytosolic Small Ribosomal Subunit (GO:0022627)	-0.575575	-3.15464	0	0	0	32/37	32.77%	RPS26;RPS27A;RPS15;RPS18;MRPS12;RPS10;RPS4X;RPS17;RPS16;RPS25;FAU;RPS9;RPS21;RPS2;RPS28;RPS11;RPS3A;RPS7;RPS27;UBA52;RPS13;RPS8;RPS14;RPS19;RPS4Y1;RPS23;RPS6;RPS5;RPSA;RPS15A;RACK1;RPS20	SST
338	GO_Biological_Process_2023__Cellular Respiration (GO:0045333)	-0.449553	-3.15464	0	0	0	64/82	40.50%	NDUFA13;NDUFB10;BLOC1S1;NDUFB8;NDUFA2;NDUFA7;COX4I1;NDUFB11;COX8A;COX7C;NDUFA11;NDUFA6;NDUFS3;CYC1;ETFB;NDUFS7;NR4A3;COX6A1;NDUFC2;NDUFB7;COX5B;NDUFA4;MTLN;UQCR11;UQCRQ;UQCR10;COX6B1;SURF1;NDUFB2;NDUFA3;COX7A2;NDUFB3;CHCHD5;NDUFS8;UQCRB;CYCS;NDUFA1;NDUFS5;NDUFS6;NDUFAB1;UQCRFS1;COX5A;COX7B;NDUFB5;MDH2;UQCRH;NDUFV1;NDUFV2;NDUFA8;UQCRC1;NDUFC1;NDUFB9;SLC25A13;COX15;NDUFA12;SDHA;OXA1L;NDUFA9;COX6C;N…	SST
339	GO_Molecular_Function_2023__Oxidoreduction-Driven Active Transmembrane Transporter Activity (GO:0015453)	-0.5093	-3.10526	0	0	0	45/52	40.50%	NDUFB10;NDUFB8;NDUFA2;NDUFA7;COX4I1;COX8A;CYB561D2;COX7C;NDUFA6;COX7A1;NDUFS3;NDUFS7;NDUFC2;NDUFB7;COX5B;NDUFA4;CYB561A3;UQCR10;COX6B1;NDUFB2;UQCRHL;NDUFA3;NDUFB3;NDUFS8;UQCRB;NDUFA1;NDUFS5;NDUFS6;COX5A;COX7B;NDUFB5;UQCRH;NDUFV1;NDUFV2;NDUFA8;UQCRC1;NDUFC1;NDUFB9;CYB5A;NDUFA12;NDUFA9;NDUFB4;NDUFB1;NDUFA5;NDUFS2	SST
340	GO_Cellular_Component_2023__Mitochondrial Inner Membrane (GO:0005743)	-0.328883	-3.09798	0	0	0	240/345	45.41%	MRPL54;UQCC3;PLA2G4A;NDUFA13;NDUFB10;ENDOG;MRPL36;MRPL53;NDUFB8;SCO2;NDUFAF3;NDUFA2;NDUFA7;COX4I1;ATP5F1D;CCDC51;ATP5MGL;MRPL34;TIMM17B;GADD45GIP1;BCS1L;NDUFB11;MRPL28;ATP5MC1;COA3;COX8A;MRPS34;COX7C;NDUFA11;TIMM13;NDUFA6;MRPS17;MRPS28;NDUFS3;MRPL12;MGARP;SLC25A10;CYC1;SLC25A5;CHCHD1;MRPS12;PARL;TIMM10;AURKAIP1;MICOS13;ATP5MF;TMEM160;COX6A1;NDUFC2;MRPL51;SLC25A1;NDUFB7;COX5B;SHMT2;SDHD;STOML2;MRP…	SST
341	KEGG_2021_Human__Oxidative phosphorylation	-0.411304	-3.07977	0	0	0	82/111	40.50%	ATP12A;ATP6V0C;NDUFA13;NDUFB10;NDUFB8;NDUFA4L2;NDUFA2;NDUFA7;COX4I1;ATP5F1D;NDUFB11;ATP5MC1;COX8A;COX7C;NDUFA11;NDUFA6;COX7A1;NDUFS3;ATP6V1F;CYC1;NDUFS7;ATP5MF;COX6A1;NDUFC2;NDUFB7;COX5B;SDHD;NDUFA4;ATP6V1C2;UQCR11;UQCRQ;ATP5ME;UQCR10;COX6B1;ATP5PO;NDUFB2;UQCRHL;ATP5PF;ATP6V1G2;NDUFA3;ATP5MC3;ATP6V0B;COX7A2;NDUFB3;NDUFS8;UQCRB;NDUFA1;NDUFS5;ATP5F1B;ATP5PD;NDUFS6;NDUFAB1;UQCRFS1;COX5A;COX7B;NDUFB5…	SST
342	KEGG_2021_Human__ECM-receptor interaction	0.40243	3.06271	0	0	0	41/73	18.64%	COL1A2;ITGA8;SDC4;ITGA4;TNC;CD44;LAMC3;LAMB2;SV2C;ITGB4;LAMA4;LAMA3;ITGA1;VTN;COL4A1;TNN;ITGAV;COL9A3;COL4A2;ITGA2;ITGA11;THBS1;LAMC2;LAMA2;VWF;SV2B;ITGB8;SPP1;SDC1;LAMA1;HSPG2;ITGB5;ITGA10;TNXB;LAMB4;ITGA9;LAMA5;ITGA5;ITGA6;THBS4;GP6	SST
343	GO_Biological_Process_2023__Oxidative Phosphorylation (GO:0006119)	-0.485182	-3.06219	0	0	0	49/60	40.50%	NDUFA13;NDUFB10;NDUFB8;NDUFA2;NDUFA7;ATP5F1D;NDUFB11;NDUFA11;NDUFA6;NDUFS3;NDUFS7;ATP5MF;NDUFC2;NDUFB7;SDHD;ATP5ME;ATP5PO;NDUFB2;CHCHD10;ATP5PF;NDUFA3;NDUFB3;NDUFS8;UQCRB;NDUFA1;NDUFS5;ATP5F1B;ATP5PD;NDUFS6;NDUFAB1;SLC25A51;NDUFB5;UQCRH;NDUFV1;NDUFV2;ATP5F1E;NDUFA8;UQCRC1;NDUFC1;NDUFB9;ATP5PB;NDUFA12;SDHA;ATP5MG;NDUFA9;NDUFB4;NDUFB1;NDUFA5;NDUFS2	SST
344	GO_Biological_Process_2023__Proton Motive Force-Driven Mitochondrial ATP Synthesis (GO:0042776)	-0.505294	-3.05088	0	0	0	44/52	40.50%	NDUFA13;NDUFB10;NDUFB8;NDUFA2;NDUFA7;ATP5F1D;NDUFB11;NDUFA11;NDUFA6;NDUFS3;NDUFS7;ATP5MF;NDUFC2;NDUFB7;SDHD;ATP5ME;ATP5PO;NDUFB2;ATP5PF;NDUFA3;NDUFB3;NDUFS8;NDUFA1;NDUFS5;ATP5F1B;ATP5PD;NDUFS6;NDUFAB1;NDUFB5;NDUFV1;NDUFV2;ATP5F1E;NDUFA8;NDUFC1;NDUFB9;ATP5PB;NDUFA12;SDHA;ATP5MG;NDUFA9;NDUFB4;NDUFB1;NDUFA5;NDUFS2	SST
345	MSigDB_Hallmark_2020__Oxidative Phosphorylation	-0.355011	-3.04489	0	0	0	141/197	44.97%	ATP6V0C;NDUFB8;NDUFA2;NDUFA7;COX4I1;ATP5F1D;MRPL34;ATP5MC1;HSD17B10;COX8A;COX7C;TIMM13;NDUFA6;NDUFS3;ATP6V1F;CYC1;ETFB;SLC25A5;MRPS12;TOMM22;NDUFS7;TIMM10;BAX;GPX4;ATP5MF;COX6A1;NDUFC2;NDUFB7;COX5B;TIMM8B;SDHD;BDH2;NDUFA4;HTRA2;UQCR11;UQCRQ;PHB2;ATP5ME;IDH3B;ECH1;SLC25A11;UQCR10;COX6B1;ATP5PO;SURF1;NDUFB2;ACAA2;ATP5PF;NDUFA3;ATP5MC3;IDH3G;ATP6V0B;COX7A2;NDUFB3;LDHB;SLC25A20;LDHA;MRPL11;NDUFS8;UQC…	SST
346	GO_Biological_Process_2023__Extracellular Matrix Organization (GO:0030198)	0.318448	2.88102	0	0	0	53/135	12.56%	ADAMTS12;COL1A2;POSTN;KLK4;SERPINH1;ADAMTS14;COL13A1;LOXL4;NID2;SMOC2;COL5A1;ADAMTS2;LOX;LOXL1;SMOC1;COL11A1;HPSE2;COL24A1;COL12A1;NID1;COL27A1;TGFBI;ADAMTS5;SERPINF2;PXDN;ADAMTS17;TLL1;COL4A1;COL8A1;COL9A3;COL16A1;COL10A1;CYP1B1;ELN;THSD4;COL4A2;ADAMTS1;FLRT2;BMP1;MMP26;ADAMTS16;ADAMTS3;COL23A1;TGFBR1;LOXL2;COL7A1;COL11A2;SCX;ADAMTS19;TGFB2;MMP17;MATN2;COL22A1	SST
347	GO_Cellular_Component_2023__Mitochondrial Membrane (GO:0031966)	-0.284693	-2.85671	0	3.52271e-05	0.001	319/494	45.41%	HINT2;MRPL54;UQCC3;PLA2G4A;NDUFA13;NDUFB10;ABCB6;ENDOG;VRK2;MRPL36;MRPL53;NDUFB8;SCO2;NDUFAF3;NDUFA2;NDUFA7;COX4I1;ATP5F1D;CCDC51;KMO;ATP5MGL;MRPL34;TIMM17B;FZD9;GADD45GIP1;BCS1L;NDUFB11;MRPL28;ATP5MC1;COA3;COX8A;MRPS34;COX7C;NDUFA11;TIMM13;NDUFA6;MRPS17;GPER1;RAB32;IKBKE;RPS27A;MRPS28;IFI27;NDUFS3;MRPL12;MGARP;SLC25A10;CYC1;SLC25A5;CHCHD1;MTX1;MRPS12;TOMM22;HAX1;PARL;COASY;TIMM10;AURKAIP1;MICOS1…	SST
348	GO_Cellular_Component_2023__Collagen-Containing Extracellular Matrix (GO:0062023)	0.266792	2.82745	0	0.000241393	0.001	101/273	14.01%	AEBP1;COL1A2;POSTN;SERPINH1;ACAN;CXCL12;TNC;TGM2;COL13A1;LOXL4;NID2;ANGPT1;MMRN1;SMOC2;COL5A1;LOX;LOXL1;LAMB2;ANXA1;SMOC1;C1QA;FBN2;C1QC;WNT2;PODN;COL11A1;C1QB;COL24A1;COL12A1;FBLN5;MFGE8;EMILIN2;NID1;AGT;PLAT;COL27A1;GDF15;TGFBI;COL20A1;AZGP1;LAMA4;LAMA3;VWA2;ICAM1;PRELP;ANXA2;ABI3BP;SERPINF2;PXDN;F13A1;VTN;COL4A1;NRG1;COL8A1;TNN;COL9A3;COL16A1;COL10A1;ELN;THSD4;COL4A2;APOA1;FGF10;ADAMTS1;PCSK6;…	SST
349	GO_Cellular_Component_2023__Organelle Inner Membrane (GO:0019866)	-0.295429	-2.81432	0	3.38722e-05	0.001	246/369	45.41%	MRPL54;UQCC3;PLA2G4A;NDUFA13;NDUFB10;ENDOG;MRPL36;MRPL53;NDUFB8;FAM209A;SCO2;NDUFAF3;NDUFA2;NDUFA7;COX4I1;ATP5F1D;CCDC51;ATP5MGL;MRPL34;TIMM17B;GADD45GIP1;BCS1L;NDUFB11;MRPL28;ATP5MC1;COA3;COX8A;MRPS34;COX7C;NDUFA11;TIMM13;NDUFA6;MRPS17;MRPS28;IFI27;NDUFS3;MRPL12;MGARP;SLC25A10;CYC1;SLC25A5;CHCHD1;MRPS12;PARL;TIMM10;AURKAIP1;MICOS13;ATP5MF;TMEM160;COX6A1;NDUFC2;MRPL51;SLC25A1;NDUFB7;COX5B;SHMT2;S…	SST
350	WikiPathway_2023_Human__GPCRs Class A Rhodopsin Like WP455	-0.352913	-2.78944	0	6.52354e-05	0.002	65/135	16.30%	OPN1SW;OR2J2;MC4R;P2RY1;DRD3;OR14J1;PTGFR;HTR7;HTR1B;GPR171;GPR87;OR11A1;HCRTR2;P2RY6;NPY2R;P2RY13;OR5V1;TBXA2R;CX3CR1;GPR17;PTGIR;PTGER3;MCHR1;AVPR1A;GPR3;GPR21;NPY5R;ADRA2A;PTGER4;NPFFR2;CYSLTR1;HTR1D;GPR18;OR7A17;GPER1;ADORA2B;GPR37L1;TRHR;NPY1R;C3AR1;HTR1E;CNR2;HTR1A;OR2AG1;MC1R;RGL4;ACKR4;OPRM1;F2RL1;DRD1;FPR3;OR3A3;CHRM4;ADRA1B;NPFFR1;HTR2A;HTR2B;CCR10;SSTR1;OR7C1;GPR34;P2RY12;LTB4R;CCKBR;H…	SST
351	GO_Biological_Process_2023__NADH Dehydrogenase Complex Assembly (GO:0010257)	-0.451361	-2.77126	0	6.07364e-05	0.002	41/53	41.36%	NDUFA13;NDUFB10;NDUFB8;NDUFAF3;NDUFA2;BCS1L;NDUFB11;NDUFA11;NDUFA6;NDUFS3;NDUFS7;NDUFC2;NDUFB7;NDUFB2;NDUFA3;TMEM126A;NDUFAF8;NDUFB3;NDUFS8;NDUFA1;NDUFS5;FOXRED1;NDUFAB1;DMAC2;NDUFB5;NDUFA8;TMEM186;NDUFC1;NDUFB9;NDUFAF4;DMAC1;TIMM21;OXA1L;NDUFA9;NDUFB4;NDUFB1;ECSIT;NDUFA5;NDUFS2;NDUFAF1;TAFAZZIN	SST
352	GO_Biological_Process_2023__Mitochondrial Respiratory Chain Complex I Assembly (GO:0032981)	-0.451361	-2.77126	0	6.07364e-05	0.002	41/53	41.36%	NDUFA13;NDUFB10;NDUFB8;NDUFAF3;NDUFA2;BCS1L;NDUFB11;NDUFA11;NDUFA6;NDUFS3;NDUFS7;NDUFC2;NDUFB7;NDUFB2;NDUFA3;TMEM126A;NDUFAF8;NDUFB3;NDUFS8;NDUFA1;NDUFS5;FOXRED1;NDUFAB1;DMAC2;NDUFB5;NDUFA8;TMEM186;NDUFC1;NDUFB9;NDUFAF4;DMAC1;TIMM21;OXA1L;NDUFA9;NDUFB4;NDUFB1;ECSIT;NDUFA5;NDUFS2;NDUFAF1;TAFAZZIN	SST
353	WikiPathway_2023_Human__Endochondral Ossification WP474	0.411781	2.76725	0	0.000517271	0.003	28/52	20.26%	SERPINH1;ACAN;BMP6;PTH1R;PLAT;ENPP1;ADAMTS5;GLI3;BMP7;ALPL;SCIN;FGFR3;COL10A1;SOX9;ADAMTS1;FRZB;FGF18;SPP1;TGFB2;GHR;PTCH1;FGFR1;TIMP3;RUNX2;TGFB1;CHST11;DDR2;MEF2C	SST
354	WikiPathway_2023_Human__Endochondral Ossification With Skeletal Dysplasias WP4808	0.411781	2.76725	0	0.000517271	0.003	28/52	20.26%	SERPINH1;ACAN;BMP6;PTH1R;PLAT;ENPP1;ADAMTS5;GLI3;BMP7;ALPL;SCIN;FGFR3;COL10A1;SOX9;ADAMTS1;FRZB;FGF18;SPP1;TGFB2;GHR;PTCH1;FGFR1;TIMP3;RUNX2;TGFB1;CHST11;DDR2;MEF2C	SST
355	KEGG_2021_Human__Prion disease	-0.310714	-2.76641	0	8.80678e-05	0.003	128/235	33.12%	TUBB1;CREB3L4;NDUFA13;NDUFB10;GRIN2C;NDUFB8;CAV1;NDUFA4L2;TUBA3D;CYBA;CCL5;NDUFA2;NOTCH1;NDUFA7;COX4I1;ATP5F1D;DDIT3;CREB3L3;NDUFB11;ATP5MC1;COX8A;COX7C;NDUFA11;NDUFA6;COX7A1;KLC3;NDUFS3;TUBB3;CYC1;SLC25A5;CAV3;CREB5;NDUFS7;TUBA1A;BAX;PRKCD;COX6A1;NDUFC2;PSMC5;NDUFB7;COX5B;SDHD;NDUFA4;RYR3;HSPA1L;CACNA1S;UQCR11;PPIF;TUBB6;CSNK2A3;UQCRQ;BAD;UQCR10;COX6B1;ATP5PO;NDUFB2;UQCRHL;ITPR3;ATP5PF;ATF4;NDUF…	SST
356	KEGG_2021_Human__Parkinson disease	-0.313606	-2.74683	0	0.000113636	0.004	147/219	44.03%	TUBB1;TH;NDUFA13;CALML4;NDUFB10;NDUFB8;NDUFA4L2;TUBA3D;NDUFA2;NDUFA7;COX4I1;ATP5F1D;DDIT3;SLC18A2;NDUFB11;ATP5MC1;COX8A;COX7C;NDUFA11;TP53;NDUFA6;COX7A1;RPS27A;KLC3;NDUFS3;TUBB3;CYC1;SLC25A5;NDUFS7;TUBA1A;DRD1;BAX;COX6A1;NDUFC2;PSMC5;NDUFB7;COX5B;UBB;SDHD;NDUFA4;RYR3;HTRA2;UQCR11;PPIF;TUBB6;UQCRQ;DAXX;UQCR10;COX6B1;ATP5PO;NDUFB2;UQCRHL;ITPR3;ATP5PF;ATF4;NDUFA3;XBP1;TUBB2A;ATP5MC3;TUBA4A;PSMB6;GPR…	SST
357	GO_Molecular_Function_2023__NADH Dehydrogenase (Quinone) Activity (GO:0050136)	-0.51435	-2.74169	0	0.000110085	0.004	29/34	40.50%	NDUFB10;NDUFB8;NDUFA2;NDUFA7;NDUFA6;NDUFS3;NDUFS7;NDUFC2;NDUFB7;NDUFA4;NDUFB2;NDUFA3;NQO1;NDUFB3;NDUFS8;NDUFS5;NDUFS6;NDUFB5;NDUFV1;NDUFV2;NDUFA8;NDUFC1;NDUFB9;NDUFA12;NDUFA9;NDUFB4;NDUFB1;NDUFA5;NDUFS2	SST
358	GO_Biological_Process_2023__Mitochondrial Electron Transport, NADH To Ubiquinone (GO:0006120)	-0.512352	-2.71868	0	0.000106749	0.004	29/34	40.66%	NDUFB10;NDUFB8;NDUFA2;NDUFA7;NDUFA6;NDUFS3;NDUFS7;NDUFC2;NDUFB7;NDUFA4;NDUFB2;NDUFA3;NDUFB3;NDUFS8;NDUFS5;NDUFS6;NDUFAB1;NDUFB5;NDUFV1;NDUFV2;NDUFA8;NDUFC1;NDUFB9;NDUFA9;NDUFB4;NDUFB1;NDUFA5;NDUFS2;NDUFAF1	SST
359	GO_Biological_Process_2023__Aerobic Respiration (GO:0009060)	-0.43652	-2.71559	0	0.000103609	0.004	43/57	40.50%	NDUFA13;NDUFB10;BLOC1S1;NDUFB8;NDUFA2;NDUFA7;ATP5F1D;NDUFB11;NDUFA11;NDUFA6;NDUFS3;NDUFS7;NDUFC2;NDUFB7;SURF1;NDUFB2;CHCHD10;NDUFA3;NDUFB3;NDUFS8;UQCRB;NDUFA1;NDUFS5;NDUFS6;NDUFAB1;SLC25A51;NDUFB5;MDH2;UQCRH;NDUFV1;NDUFV2;NDUFA8;UQCRC1;NDUFC1;NDUFB9;NDUFA12;OXA1L;NDUFA9;NDUFB4;NDUFB1;MTFR1L;NDUFA5;NDUFS2	SST
360	GO_Biological_Process_2023__External Encapsulating Structure Organization (GO:0045229)	0.350536	2.70452	0	0.00150871	0.01	35/81	12.56%	ADAMTS12;COL1A2;POSTN;ADAMTS14;COL13A1;SMOC2;COL5A1;ADAMTS2;SMOC1;COL11A1;HPSE2;COL24A1;TGFBI;ADAMTS5;PXDN;ADAMTS17;COL4A1;COL8A1;COL9A3;COL16A1;COL10A1;THSD4;COL4A2;ADAMTS1;TGM1;MMP26;ADAMTS16;ADAMTS3;COL23A1;HRNR;COL7A1;ADAMTS19;MMP17;MATN2;COL22A1	SST
361	GO_Biological_Process_2023__Mitochondrial Translation (GO:0032543)	-0.370659	-2.69028	0	0.000100649	0.004	73/98	46.20%	MRPL54;MRPL36;MRPL53;NDUFA7;MRPL34;GADD45GIP1;MRPL28;MRPS34;MRPS17;MRPS28;MRPL12;CHCHD1;MRPS12;TUFM;MRPL51;MRPL55;MRPL27;MRPL10;MRPL17;MRPL23;MRPS24;MRPL40;MRPL57;MRPL21;MTG1;MRPL58;MRPL11;MRPL49;MRPS33;MRPL46;MRPS7;MRPL24;MRPL44;MRPL9;MRPL2;MRPS2;MRPL16;MRPL43;MRPS18B;MRPL18;MRPL41;MRPS18A;MRPS26;TSFM;MRPS6;MRPL4;MRPS15;MRPL52;MRPL35;MRPS22;MRPL14;MRPL20;MRPL47;MRPL22;MRPS10;MRPL37;MTRF1;MRPS21;…	SST
362	GO_Cellular_Component_2023__Mitochondrial Respiratory Chain Complex I (GO:0005747)	-0.479888	-2.68858	0	9.52084e-05	0.004	34/41	40.66%	NDUFA13;NDUFB10;NDUFB8;NDUFA2;NDUFA7;NDUFB11;NDUFA11;NDUFA6;NDUFS3;NDUFS7;NDUFC2;NDUFB7;NDUFA4;NDUFB2;NDUFA3;NDUFB3;NDUFS8;NDUFA1;NDUFS5;NDUFS6;NDUFAB1;NDUFB5;NDUFV1;NDUFV2;NDUFA8;NDUFC1;NDUFB9;NDUFA12;NDUFA9;NDUFB4;NDUFB1;NDUFA5;NDUFS2;NDUFAF1	SST
363	GO_Cellular_Component_2023__Respiratory Chain Complex I (GO:0045271)	-0.479888	-2.68858	0	9.52084e-05	0.004	34/41	40.66%	NDUFA13;NDUFB10;NDUFB8;NDUFA2;NDUFA7;NDUFB11;NDUFA11;NDUFA6;NDUFS3;NDUFS7;NDUFC2;NDUFB7;NDUFA4;NDUFB2;NDUFA3;NDUFB3;NDUFS8;NDUFA1;NDUFS5;NDUFS6;NDUFAB1;NDUFB5;NDUFV1;NDUFV2;NDUFA8;NDUFC1;NDUFB9;NDUFA12;NDUFA9;NDUFB4;NDUFB1;NDUFA5;NDUFS2;NDUFAF1	SST
364	GO_Molecular_Function_2023__NADH Dehydrogenase (Ubiquinone) Activity (GO:0008137)	-0.511584	-2.68689	0	9.27029e-05	0.004	28/33	40.50%	NDUFB10;NDUFB8;NDUFA2;NDUFA7;NDUFA6;NDUFS3;NDUFS7;NDUFC2;NDUFB7;NDUFA4;NDUFB2;NDUFA3;NDUFB3;NDUFS8;NDUFS5;NDUFS6;NDUFB5;NDUFV1;NDUFV2;NDUFA8;NDUFC1;NDUFB9;NDUFA12;NDUFA9;NDUFB4;NDUFB1;NDUFA5;NDUFS2	SST
365	KEGG_2021_Human__Neuroactive ligand-receptor interaction	-0.307634	-2.6792	0	0.000112907	0.005	90/218	16.30%	RXFP3;SST;MC4R;P2RY1;DRD3;NMB;CORT;VIPR2;PTGFR;PENK;TAC3;GRM2;NPY;TAC1;HTR7;HTR1B;CHRNA10;HCRTR2;POMC;P2RY6;KISS1R;NPY2R;P2RY13;GIPR;TBXA2R;P2RX6;S1PR3;GRIN2C;ADM;GABRR2;PTGIR;PTGER3;MCHR1;AVPR1A;NPB;CHRNB3;NPY5R;ADRA2A;PTGER4;NPFFR2;PLG;S1PR1;CHRNG;CYSLTR1;C3;HTR1D;CHRNA9;CRH;UTS2;ADORA2B;GABRG3;TRHR;NPY1R;C3AR1;HTR1E;GRM8;UCN;CNR2;HTR1A;CALCR;GNRHR;MC1R;P2RX5;GPR156;OPRM1;CHRNB1;F2RL1;TSHR;LPAR…	SST
366	GO_Biological_Process_2023__Extracellular Structure Organization (GO:0043062)	0.346823	2.67365	0	0.00227982	0.016	36/81	13.97%	ADAMTS12;COL1A2;POSTN;ADAMTS14;COL13A1;SMOC2;COL5A1;ADAMTS2;SMOC1;COL11A1;HPSE2;COL24A1;TGFBI;ADAMTS5;PXDN;ADAMTS17;COL4A1;COL8A1;COL9A3;COL16A1;COL10A1;THSD4;COL4A2;ADAMTS1;MMP26;ADAMTS16;ADAMTS3;COL23A1;TGFBR1;COL7A1;ADAMTS19;MMP17;MATN2;COL22A1;SLC39A8;TEX14	SST
367	GO_Biological_Process_2023__Mitochondrial Gene Expression (GO:0140053)	-0.359827	-2.63724	0	0.000110085	0.005	72/103	43.53%	MRPL54;MRPL36;MRPL53;NDUFA7;MRPL34;GADD45GIP1;TWNK;MRPL28;MRPS34;MRPS17;MRPS28;MRPL12;CHCHD1;MRPS12;MRPL51;MRPL55;MRPL27;MRPL10;MRPL17;MRPL23;MRPS24;TBRG4;MRPL40;MRPL57;MRPL21;MTG1;MRPL58;POLRMT;MRPL11;MRPL49;FASTK;MRPS33;MRPL46;MRPS7;MRPL24;MRPL44;MRPL9;MRPL2;MRPS2;MRPL16;MRPL43;MRPS18B;MRPL18;MRPL41;MRPS18A;MRPS26;MRPS6;MRPL4;MRPS15;MRPL52;MRPL35;MRPS22;MRPL14;FASTKD3;MRPL20;MRPL47;MRPL22;MRPS1…	SST
368	GO_Cellular_Component_2023__Microvillus (GO:0005902)	0.403752	2.63661	0	0.00265532	0.021	26/44	20.56%	SLC38A4;CD44;ANGPT1;PROM1;SYTL1;PDPN;FSCN3;ITGAV;EZR;MYO1B;CLIC4;VIL1;PROM2;MYO1E;RAPGEF3;TEK;MSN;MYO1D;TGFB1;PODXL;PDGFA;MYO1C;LRRK2;CUBN;SLC7A5;CDHR2	SST
369	WikiPathway_2023_Human__Mitochondrial Complex I Assembly Model OXPHOS System WP4324	-0.43465	-2.61932	0	0.00015036	0.007	37/50	40.66%	NDUFA13;NDUFB10;NDUFB8;NDUFAF3;NDUFA2;NDUFA7;NDUFB11;NDUFA6;NDUFS3;NDUFC2;NDUFB7;NDUFB2;NDUFA3;NDUFB3;NDUFA1;NDUFS5;FOXRED1;NDUFS6;NDUFAB1;DMAC2;TMEM70;NDUFB5;NDUFV1;NDUFV2;NDUFA8;TMEM186;NDUFC1;NDUFB9;NDUFA12;NDUFAF4;DMAC1;NDUFB4;NDUFB1;ECSIT;NDUFA5;NDUFS2;NDUFAF1	SST
370	GO_Biological_Process_2023__Cell-Matrix Adhesion (GO:0007160)	0.320272	2.6148	0	0.00307228	0.026	40/91	19.78%	ADAMTS12;TRIP6;ITGA8;SIGLEC1;ITGA4;CD44;COL13A1;NID2;ITGB2;ACTN3;PTPRK;FBLN5;CD96;EMP2;ITGB4;VWA2;ITGA1;VTN;TNN;ITGAV;ITGA2;ITGA11;CD34;PARVG;FERMT1;OTOA;ITGB8;FERMT2;ITGAL;CDH11;ITGB5;ITGA10;ITGA9;ITGA5;THSD1;ITGA6;ACTN2;ECM2;ADAM15;RCC2	SST
371	GO_Cellular_Component_2023__Polysomal Ribosome (GO:0042788)	-0.529549	-2.58236	0	0.000209685	0.01	19/27	28.46%	RPL7A;RPL19;RPS26;RPL18A;RPL10A;RPL36AL;RPL41;RPL8;RPS21;RPL6;RPL36;RPS28;RPL24;RPL11;RPL32;RPL18;RPS23;RPL39;RPL38	SST
372	MSigDB_Hallmark_2020__Myc Targets V1	-0.303702	-2.58017	0	0.000204809	0.01	165/195	57.74%	IMPDH2;CYC1;NME1;RPS10;EEF1B2;TUFM;RRP9;LSM7;EIF4A1;ODC1;TYMS;HSPE1;PHB2;NOP16;RPS2;PRDX4;RPL6;RPLP0;MCM7;MRPL23;MAD2L1;RANBP1;SNRPD2;PSMD8;NHP2;PSMA7;C1QBP;H2AZ1;LSM2;RPL18;RAN;CCT7;LDHA;PPIA;CCT5;PA2G4;NDUFAB1;COX5A;APEX1;AIMP2;MRPL9;HNRNPA1;TRIM28;RPS6;RPS5;SRM;RPL14;KPNA2;HSP90AB1;MRPS18B;PSMB3;PCNA;CDK4;SNRPB2;RACK1;ILF2;PCBP1;SRSF2;POLD2;ERH;POLE3;FBL;IFRD1;PSMD7;VBP1;RPL34;PRDX3;SET;SRSF7;…	SST
373	WikiPathway_2023_Human__Mitochondrial Complex IV Assembly WP4922	-0.499946	-2.57286	0	0.000200154	0.01	28/31	44.66%	COX14;TACO1;PET117;COX4I1;COA3;COX8A;COX7C;COX6A1;COX5B;NDUFA4;COX6B1;SURF1;PET100;COX7A2;HIGD1A;COX5A;COX16;COX7B;COX20;COX17;TMEM177;COX15;COA6;SMIM20;COX6C;PNKD;COX19;COX18	SST
374	KEGG_2021_Human__Coronavirus disease	-0.306058	-2.57001	0	0.000215277	0.011	98/176	30.05%	MASP1;RPL7A;C3;NRP1;RPL19;IKBKE;RPS26;C3AR1;RPS27A;RPL18A;RPL13A;RPS15;MYD88;RPS18;RPL10A;RPL10;RPL12;RPS10;RPS4X;RPS17;RPS16;RPS25;RPL36AL;FAU;RPL41;RPS12;NLRP3;SELP;RPL29;RPL21;RPL8;RPL3;RPS9;RPL35;RPS21;IRF3;RPS2;MASP2;RPL6;RPL36;RPLP0;RPL7;RPL13;IKBKG;ISG15;RPL26;RPLP1;RPS28;RPS11;RPL22L1;HBEGF;MAPK11;RPL24;PLCG2;RPL11;RPL32;FOS;RPS3A;RPL28;IRAK4;CFD;RPS7;RPL18;RPS27;RPL26L1;IRAK1;RPL9;UBA52;…	SST
375	GO_Molecular_Function_2023__Transmembrane Receptor Protein Tyrosine Kinase Activity (GO:0004714)	0.390005	2.52704	0	0.00623599	0.055	23/43	18.85%	ROS1;EGFR;ROR1;ERBB4;MERTK;MET;AXL;PDGFRB;FGFR4;ROR2;FGFR3;PDGFRA;EPHA3;FGFRL1;ERBB2;FLT1;NELL2;FGFR1;TEK;NTRK3;TYRO3;CRIM1;DDR2	SST
376	WikiPathway_2023_Human__Burn Wound Healing WP5055	0.365597	2.51852	0	0.00705611	0.069	23/53	12.89%	COL1A2;SERPINH1;HGF;CXCL12;TNC;TIMP1;TLR4;NOX4;CXCR4;INHBA;SCEL;PDGFRB;PECAM1;ICAM1;FGFR4;F13A1;FGFR3;ELN;SMAD3;IL15;TGFB2;TGFB3;FGFR1	SST
377	GO_Biological_Process_2023__Transmembrane Receptor Protein Serine/Threonine Kinase Signaling Pathway (GO:0007178)	0.293695	2.51387	0	0.00681073	0.072	43/109	19.68%	COL1A2;INHBB;TMEM100;GDF7;BMP3;HPGD;CLDN5;NRROS;SMAD6;INHBA;FOXH1;PTPRK;BMP6;ATOH8;GDF15;BMP7;WFIKKN1;APOA1;GCNT2;SMAD3;AMH;BMPR1B;TGFBR1;GDF9;BMP8A;FERMT2;HFE;SCX;LTBP2;TGFB2;TGFB3;BMP8B;ENG;TGFBR3;ITGB5;JUN;RUNX2;SMAD9;TGFB1;ACVR1;PXN;PPARG;SMAD7	SST
378	GO_Molecular_Function_2023__Active Monoatomic Ion Transmembrane Transporter Activity (GO:0022853)	-0.578972	-2.49655	0	0.000631791	0.032	16/20	26.95%	COX4I1;SLC18A2;COX8A;COX7C;COX7A1;COX5B;UQCR10;COX6B1;UQCRHL;SLC47A2;UQCRB;SLC47A1;COX5A;COX7B;UQCRH;UQCRC1	SST
379	GO_Biological_Process_2023__Regulation Of Synapse Assembly (GO:0051963)	0.363507	2.45163	0	0.0103799	0.114	29/48	28.38%	GPC4;TLR2;SYNDIG1;CUX2;GHRL;MDGA1;BDNF;IL1RAP;GPRASP3;SLIT1;PDLIM5;RAB17;EPHB1;WNT7A;NLGN1;MEF2C;GRID2;LRFN5;NLGN2;LRRTM3;SLITRK5;NLGN3;EPHB2;NRXN1;RAP2A;LRRC4B;ROBO2;DLG5;SLITRK3	SST
380	GO_Biological_Process_2023__Phagocytosis (GO:0006909)	0.357262	2.4379	0	0.0114662	0.129	24/57	14.01%	AIF1;MSR1;BIN2;TGM2;TLR4;TAFA4;TIMD4;MERTK;ANXA1;ITGB2;MET;SH3BP1;AXL;ANXA3;PECAM1;MYH9;ITGAV;RARA;SLC11A1;MEGF10;CD302;ADORA1;SRPX;ANXA11	SST
381	MSigDB_Hallmark_2020__Inflammatory Response	0.266904	2.42449	0	0.0121407	0.145	50/148	12.60%	TNFSF15;RGS1;MSR1;ROS1;TACR1;STAB1;TIMP1;TLR2;OPRK1;NMUR1;INHBA;MET;EDN1;NMI;KCNJ2;BST2;RNF144B;PIK3R5;CALCRL;LYN;AXL;IL15RA;FPR1;IL4R;CMKLR1;GPC3;ICAM1;CYBB;GPR132;PDPN;TLR1;PTAFR;SLC7A2;SELL;CDKN1A;F3;IL15;C5AR1;LAMP3;SLC4A4;NDP;HRH1;BEST1;ITGB8;TACR3;TNFRSF1B;EMP3;SLC28A2;PCDH7;SCARF1	SST
382	GO_Biological_Process_2023__Adenylate Cyclase-Activating G Protein-Coupled Receptor Signaling Pathway (GO:0007189)	-0.363816	-2.41538	0	0.00148029	0.076	29/70	12.49%	MC4R;DRD3;PTGFR;ADGRG6;GIPR;TBXA2R;ADM;PTGIR;PTGER3;GPR3;ADRA2A;PTGER4;GPHB5;RAMP2;ADGRE3;PTHLH;UTS2;GPER1;ADORA2B;ADCY7;ADM5;CALCR;MC1R;ADGRG5;GPR26;TSHR;DRD1;ADRA1B;ADGRE2	SST
383	WikiPathway_2023_Human__Extracellular Vesicle Mediated Signaling In Recipient Cells WP2870	0.446172	2.41083	0	0.012539	0.158	13/28	12.42%	HGF;EGFR;TGFA;MET;PROM1;PIK3R5;MFGE8;SMAD3;TGFBR1;ERBB2;TGFB2;TGFB3;TGFBR3	SST
384	GO_Biological_Process_2023__Gene Expression (GO:0010467)	-0.263714	-2.41046	0	0.00165127	0.084	174/279	45.20%	H3C1;CASP4;MRPL36;RPL7A;EXOSC4;MRPL34;MRPL28;RPL19;ABCC6;MRPS17;RPS26;RPS27A;MRPL12;RPL18A;RPL13A;ALYREF;RPS15;RPS18;RPL10A;MRPS12;RPL10;STUB1;RPL12;RPS10;RPS4X;RPS17;PRPH2;RPS16;RPS25;RPL36AL;FAU;MRPL51;RPL41;DHPS;NLRP3;MRPL55;EXOSC5;TSPAN33;RPL29;RPL21;NXT1;RPL8;THOC6;RPL3;RPS9;MRPL27;RPL35;MRPL10;THOC3;RPS21;LMF2;RPS2;RPL6;RPL36;CASP8;RPLP0;RPL7;RPL13;RPL26;MRPL23;RPLP1;DDX54;RPS28;RPS11;RPL24…	SST
385	GO_Biological_Process_2023__Skeletal System Development (GO:0001501)	0.283725	2.41002	0	0.0118791	0.158	40/112	13.59%	CHI3L1;COL1A2;TGM2;CD44;BMP3;COL13A1;TEAD4;BMP6;PTH1R;RFLNB;PKDCC;COL27A1;GHRL;GJA1;CMKLR1;PRELP;BMP7;NPR3;ALPL;TLL1;FGFR3;COL10A1;SOX9;AKAP13;BMP1;EVC;FRZB;TGFBR1;COL11A2;ITGB8;GLI2;SULF2;TGFB2;BMP8B;PHEX;PCSK5;CNMD;FGFR1;CDH11;ETS2	SST
386	GO_Biological_Process_2023__Regulation Of Activated T Cell Proliferation (GO:0046006)	-0.516424	-2.40991	0	0.00161757	0.084	13/23	15.00%	HHLA2;ICOSLG;LGALS9;IL18;IDO1;CRTAM;PDCD1LG2;CD274;IL12RB1;IGFBP2;TNFSF9;FADD;CD24	SST
387	GO_Biological_Process_2023__SMAD Protein Signal Transduction (GO:0060395)	0.397654	2.40949	0	0.0113455	0.158	19/39	16.47%	INHBB;GDF7;BMP3;SMAD6;INHBA;BMP6;ATOH8;GDF15;BMP7;SMAD3;GDF9;BMP8A;TGFB2;TGFB3;BMP8B;JUN;RUNX2;SMAD9;TGFB1	SST
388	KEGG_2021_Human__Protein digestion and absorption	0.321866	2.40617	0	0.0113225	0.165	29/76	10.99%	COL1A2;MME;COL13A1;ACE2;CPB1;COL5A1;SLC9A3;COL11A1;COL24A1;COL12A1;ATP1A4;COL27A1;COL20A1;COL4A1;COL8A1;KCNE3;COL9A3;COL16A1;COL10A1;SLC1A5;ELN;COL4A2;SLC7A7;FXYD2;COL23A1;COL7A1;COL11A2;KCNN4;ATP1A2	SST
389	KEGG_2021_Human__Cytokine-cytokine receptor interaction	0.273015	2.40194	0	0.0113564	0.173	46/125	12.61%	INHBB;TNFSF15;PRLR;CXCL12;TNFRSF10D;GDF7;TNFRSF10B;BMP3;CXCR4;INHBA;BMP6;IL6R;GDF15;IL15RA;TNFRSF13C;IL4R;IL17RC;ACKR3;IL1RAP;BMP7;THPO;CXCL13;LTBR;TNFSF18;IL23A;IL15;CD4;AMH;NGF;IL17RB;FAS;IL12RB2;BMPR1B;TGFBR1;TNFRSF19;GDF9;BMP8A;TNFRSF1A;TGFB2;GHR;TNFRSF1B;EDA;TGFB3;BMP8B;CNTFR;IL10RB	SST
390	WikiPathway_2023_Human__Hair Follicle Development Cytodifferentiation Part 3 Of 3 WP2840	0.335496	2.36875	0	0.0139588	0.215	24/59	14.40%	KLK4;EGFR;KLK6;FOXQ1;FOSB;PROM1;BMP6;NOTCH2;GSDMA;LEF1;KLK14;FZD1;SOSTDC1;LHX2;GJB6;SOX9;CD34;GLI2;IGFBP5;KITLG;DSC2;NFATC1;LRIG1;JUN	SST
391	GO_Biological_Process_2023__Positive Regulation Of Reproductive Process (GO:2000243)	0.484479	2.36767	0	0.0135281	0.217	11/21	13.73%	INHBB;TACR1;INHBA;PDE3A;PLA2G10;GLRA1;TACR3;CACNA1H;TAC4;ZP3;ASIC2	SST
392	GO_Molecular_Function_2023__Hormone Activity (GO:0005179)	-0.46064	-2.36448	0	0.00260681	0.125	19/32	17.54%	SST;NMB;CORT;PENK;SPX;NPY;POMC;NPPC;VGF;METRNL;PTHLH;CRH;UCN;PNOC;GNRH1;CCK;INSL6;VIP;METRN	SST
393	KEGG_2021_Human__Thermogenesis	-0.274288	-2.36408	0	0.00257296	0.126	108/204	36.07%	CREB3L4;HRAS;COX14;NDUFA13;NDUFB10;NDUFB8;NDUFA4L2;NDUFAF3;NDUFA2;NDUFA7;COX4I1;ATP5F1D;CREB3L3;NDUFB11;ATP5MC1;COA3;COX8A;COX7C;NDUFA11;NDUFA6;COX7A1;ADCY7;NDUFS3;CYC1;PRKAG1;DPF3;CREB5;PRDM16;NDUFS7;ATP5MF;COX6A1;NDUFC2;PRKG2;NDUFB7;COX5B;SDHD;NDUFA4;KLB;UQCR11;UQCRQ;ATP5ME;UQCR10;COX6B1;ATP5PO;NDUFB2;UQCRHL;ATP5PF;NDUFA3;ATP5MC3;MAPK11;CREB3;COX7A2;CNR1;NDUFAF8;AKT1S1;NDUFB3;MLST8;SLC25A20;NDU…	SST
394	GO_Cellular_Component_2023__9+2 Motile Cilium (GO:0097729)	0.344805	2.35507	0	0.0145319	0.237	28/50	25.18%	TTC29;DNAJB13;TCP11;TACR1;TEKT5;CFAP52;DNAH8;TEKT3;CFAP65;CFAP58;CFAP74;RSPH6A;RSPH9;ATP2B4;DNAH5;ODAD4;ENKUR;DNAH9;AK8;QRICH2;CFAP221;DNAH1;RPGR;CFAP70;SPEF2;WBP2NL;CCDC181;SAXO2	SST
395	GO_Molecular_Function_2023__PDZ Domain Binding (GO:0030165)	0.333396	2.35411	0	0.0140658	0.239	30/56	27.85%	TMEM88B;SNTG2;FZD8;SLC9A3;GNG5;FZD1;LLGL2;KIF14;SSTR2;SYNJ2;CCDC88C;ADRB1;TGFBR3;F11R;ATP2B4;PLEKHA2;PDZK1;ARHGAP29;FZD4;CRIM1;SLC22A4;NLGN1;DLG4;SRR;GRID2;CIT;SLC22A5;CADM1;GRIA1;CXXC4	SST
396	GO_Biological_Process_2023__Transforming Growth Factor Beta Receptor Signaling Pathway (GO:0007179)	0.322139	2.35167	0	0.0136789	0.241	30/64	23.81%	COL1A2;HPGD;CLDN5;NRROS;SMAD6;FOXH1;PTPRK;GDF15;WFIKKN1;APOA1;GCNT2;SMAD3;TGFBR1;GDF9;FERMT2;LTBP2;TGFB2;TGFB3;ENG;TGFBR3;ITGB5;JUN;SMAD9;TGFB1;PXN;SMAD7;ZMIZ1;GPI;SRC;SKI	SST
397	GO_Molecular_Function_2023__Monoatomic Cation Channel Activity (GO:0005261)	0.297297	2.3357	0	0.0156043	0.276	41/84	24.03%	TRPA1;MCOLN2;MCOLN3;TRPM8;CALHM1;TRPV5;ANO1;TRPV4;ANXA2;TRPM3;CALHM2;TRPC5;SLC24A4;KCNG1;TRPC3;ABCC9;KCNA1;PKD1L3;KCNN4;KCNK9;KCNK10;TRPV1;PKD2L2;RYR1;NOX5;CACNB2;TRPC4;PKD1L1;ANO6;CHRNA7;PANX1;KCNQ4;TPCN2;SLC24A3;KCNK3;TMEM38A;CACNA1E;RYR2;TMEM63C;TMEM63B;HCN1	SST
398	GO_Biological_Process_2023__Adenylate Cyclase-Modulating G Protein-Coupled Receptor Signaling Pathway (GO:0007188)	-0.309961	-2.33522	0	0.00343803	0.163	49/113	19.67%	MC4R;CORT;VIPR2;PTGFR;ADGRG6;HTR1B;GPR171;GIPR;TBXA2R;ADM;PTGIR;PTGER3;MCHR1;GPR3;ADRA2A;PTGER4;GPHB5;RAMP2;GNA15;HTR1D;ADGRE3;PTHLH;UTS2;GPER1;ADORA2B;GPR37L1;ADCY7;ADM5;NPY1R;HTR1E;GRM8;CALCR;MC1R;ADGRG5;GPR26;TSHR;DRD1;ADRA1B;ADGRE2;ADGRE5;P2RY12;GNA14;VIP;RAMP1;ADRA1D;LPAR1;OPRL1;GPR37;CNR1	SST
399	GO_Molecular_Function_2023__Copper Ion Binding (GO:0005507)	-0.457365	-2.32177	0	0.00397136	0.19	26/32	39.89%	ALB;HEPH;SCO2;TP53;CUTA;MOXD1;RNF7;S100A13;LACC1;SNCG;SOD1;AOC2;SNCA;LOXL3;MT3;SNCB;PARK7;COX17;DCT;CCS;GPC1;ATOX1;COA6;PRNP;CUTC;PAM	SST
400	GO_Cellular_Component_2023__Respiratory Chain Complex IV (GO:0045277)	-0.588313	-2.31506	0	0.00414245	0.201	12/15	25.03%	NDUFA4L2;COX4I1;COX8A;COX7C;COX6A1;COX5B;NDUFA4;COX6B1;COX7A2;UQCRFS1;COX5A;COX7B	SST
401	MSigDB_Hallmark_2020__DNA Repair	-0.291353	-2.31328	0	0.00421124	0.209	111/145	51.84%	FEN1;CCNO;APRT;SAC3D1;POLR3GL;POLR2I;TP53;POLD4;NT5C;IMPDH2;ALYREF;TARBP2;NME1;GPX4;POLR2G;VPS28;GUK1;AK1;POLR2J;POLR2K;TYMS;POLE4;PNP;EDF1;SURF1;CLP1;NME4;NME3;AAAS;MRPL40;EIF1B;CETN2;CMPK2;PDE4B;GMPR2;TAF10;ADA;MPG;TAF6;VPS37D;NUDT21;COX17;DDB2;BRF2;TAF1C;SNAPC5;ZNF707;BCAP31;ADRM1;TMED2;NELFB;NELFE;PCNA;CANT1;RPA3;GTF2F1;SSRP1;POLR2C;PRIM1;NELFCD;DAD1;POLR2E;POLL;ARL6IP1;GTF2H5;POLR1C;GTF2A2;T…	SST
402	KEGG_2021_Human__Non-alcoholic fatty liver disease	-0.294476	-2.31231	0	0.0042304	0.213	64/136	27.28%	CEBPA;NDUFA13;NDUFB10;NDUFB8;NDUFA4L2;NDUFA2;NDUFA7;COX4I1;DDIT3;NDUFB11;COX8A;COX7C;NDUFA11;NDUFA6;COX7A1;NDUFS3;CYC1;PRKAG1;NDUFS7;BAX;COX6A1;NDUFC2;NDUFB7;COX5B;SDHD;NDUFA4;PPARA;UQCR11;PKLR;UQCRQ;UQCR10;COX6B1;NDUFB2;UQCRHL;CASP8;ATF4;NDUFA3;XBP1;MAPK11;BCL2L11;FOS;COX7A2;NDUFB3;NDUFS8;MAPK12;UQCRB;CYCS;NDUFA1;NDUFS5;NDUFS6;NDUFAB1;MLX;UQCRFS1;COX5A;COX7B;RELA;NDUFB5;UQCRH;NDUFV1;NDUFV2;PIK3R…	SST
403	WikiPathway_2023_Human__Nonalcoholic Fatty Liver Disease WP4396	-0.294695	-2.30945	0	0.00426433	0.217	63/133	27.28%	CEBPA;NDUFA13;NDUFB10;NDUFB8;NDUFA4L2;NDUFA2;NDUFA7;COX4I1;DDIT3;NDUFB11;COX8A;COX7C;NDUFA11;NDUFA6;COX7A1;NDUFS3;NR1H4;CYC1;PRKAG1;NDUFS7;BAX;COX6A1;NDUFC2;NDUFB7;COX5B;SDHD;NDUFA4;PPARA;UQCR11;PKLR;UQCRQ;UQCR10;BAK1;COX6B1;NDUFB2;UQCRHL;CASP8;ATF4;NDUFA3;XBP1;BCL2L11;COX7A2;NDUFB3;NDUFS8;UQCRB;CYCS;NDUFA1;NDUFS5;NDUFS6;NDUFAB1;MLX;UQCRFS1;COX5A;COX7B;RELA;NDUFB5;UQCRH;NDUFV1;NDUFV2;PIK3R3;NDUFA…	SST
404	GO_Biological_Process_2023__Ribosome Biogenesis (GO:0042254)	-0.286618	-2.30908	0	0.004206	0.217	99/150	45.59%	MRPL36;EXOSC4;RPS15;MRPS12;NOC4L;RPS4X;RPS17;RPS19BP1;RPS16;RPS25;RRS1;RRP9;GRWD1;EXOSC5;BOP1;RPS9;PIH1D2;NOP16;RPL7;RPL26;DDX54;RPS28;RPS11;BYSL;RPL11;SNU13;EMG1;WDR18;RPS3A;RPS7;RPS27;RPL26L1;RPL27;PIH1D1;RPS13;TBL3;RPS8;RPS14;ZNF658;EBNA1BP2;WDR55;RPS19;POP4;DHX37;WDR46;RPS23;RPL35A;LYAR;RPS6;DDX49;RPS5;RPL14;NOP53;METTL17;ZNF622;UTP3;RSL24D1;PES1;NOB1;RPS15A;NIP7;NOL6;RPL5;DCAF13;GTF3A;SURF6;…	SST
405	GO_Molecular_Function_2023__Proton Transmembrane Transporter Activity (GO:0015078)	-0.427457	-2.30816	0	0.00416456	0.218	24/36	32.24%	MFSD3;COX4I1;SLC18A2;COX8A;COX7C;COX7A1;ATP6V1F;COX5B;UQCR10;COX6B1;UQCRHL;SLC47A2;SLC32A1;UQCRB;SLC47A1;COX5A;COX7B;CTNS;UQCRH;UQCRC1;SLC46A1;SLC25A13;COX15;CYB5A	SST
406	GO_Molecular_Function_2023__Cyclic Nucleotide Binding (GO:0030551)	0.477677	2.30644	0	0.0187288	0.32	15/20	30.05%	STING1;CNGA3;PDE11A;POPDC3;CNGB3;POPDC2;CNGA1;CNGB1;CNGA4;KCNH1;PDE2A;PDE4A;HCN1;RAPGEF4;PDE4D	SST
407	WikiPathway_2023_Human__GPCRs Class B Secretin Like WP334	0.478402	2.30635	0	0.0181045	0.32	11/21	10.02%	GLP2R;SCTR;PTH1R;CALCRL;CRHR2;ADGRL4;GHRHR;VIPR1;PTH2R;ADGRG2;CRHR1	SST
408	GO_Cellular_Component_2023__Mitochondrial Proton-Transporting ATP Synthase Complex (GO:0005753)	-0.567713	-2.30518	0.00169205	0.00415795	0.224	16/17	39.64%	ATP5F1D;ATP5MGL;ATP5MC1;ATP5MF;ATP5ME;ATP5MJ;ATP5PO;ATP5PF;ATP5MC3;ATP5F1B;ATP5PD;ATP5F1E;ATP5MK;ATP5PB;ATP5MG;ATP5MC2	SST
409	GO_Cellular_Component_2023__Proton-Transporting ATP Synthase Complex (GO:0045259)	-0.567713	-2.30518	0.00169205	0.00415795	0.224	16/17	39.64%	ATP5F1D;ATP5MGL;ATP5MC1;ATP5MF;ATP5ME;ATP5MJ;ATP5PO;ATP5PF;ATP5MC3;ATP5F1B;ATP5PD;ATP5F1E;ATP5MK;ATP5PB;ATP5MG;ATP5MC2	SST
410	WikiPathway_2023_Human__miRNA Targets In ECM And Membrane Receptors WP2911	0.498921	2.30449	0.00250627	0.0177151	0.322	12/19	16.89%	COL1A2;COL5A1;LAMB2;LAMA4;ITGA1;COL4A1;COL4A2;ITGA11;THBS1;ITGB5;TNXB;COL5A2	SST
411	GO_Biological_Process_2023__Positive Regulation Of Synapse Assembly (GO:0051965)	0.409389	2.29663	0	0.0182554	0.338	20/30	28.38%	SYNDIG1;CUX2;GHRL;BDNF;IL1RAP;GPRASP3;EPHB1;WNT7A;SEMA4A;NLGN1;VSTM5;GRID2;NLGN2;SLITRK5;NLGN3;EPHB2;NRXN1;LRRC4B;DLG5;SLITRK3	SST
412	GO_Biological_Process_2023__Peptidyl-Tyrosine Phosphorylation (GO:0018108)	0.3404	2.28755	0	0.0190554	0.358	20/52	13.79%	PRLR;EGFR;ERBB4;SYK;PKDCC;LYN;PDGFRB;FGFR4;FGFR3;PDGFRA;EPHA3;IL15;EPHA4;ERBB2;FLT1;PDGFB;FGFR1;JAK3;PTK2B;TEK	SST
413	WikiPathway_2023_Human__Focal Adhesion WP306	0.234195	2.27328	0	0.0208024	0.395	61/181	18.09%	COL1A2;ITGA8;HGF;TXK;EGFR;ITGA4;TNC;LAMC3;LAMB2;MET;MYL7;PDGFD;RAC2;PDGFRB;EMP2;ITGB4;LAMA4;LAMA3;ITGA1;VTN;COL4A1;TNN;ITGAV;PDGFRA;COL4A2;ITGA2;ITGA11;THBS1;LAMC2;LAMA2;VWF;PARVG;MYL5;ERBB2;FLT1;ITGB8;SPP1;PDGFB;LAMA1;ACTN1;VASP;PIK3R2;ITGB5;ITGA10;TNXB;ITGA9;JUN;MYLK4;LAMA5;MYLK3;ITGA5;PRKCA;ITGA6;FLNA;PDGFA;COL5A2;MYLK;THBS4;CCND3;PRKCG;PAK6	SST
414	GO_Biological_Process_2023__Peptidyl-Tyrosine Modification (GO:0018212)	0.346008	2.26675	0	0.0209667	0.412	18/45	13.79%	EGFR;ERBB4;SYK;PKDCC;LYN;PDGFRB;FGFR4;FGFR3;PDGFRA;EPHA3;EPHA4;ERBB2;FLT1;PDGFB;FGFR1;JAK3;PTK2B;TEK	SST
415	WikiPathway_2023_Human__Hematopoietic Stem Cell Gene Regulation By GABP Alpha Beta Complex WP3657	0.483484	2.25789	0.0025974	0.0216583	0.433	17/19	40.64%	DNMT3B;ETV6;FLT3;BCL2;MCL1;BCL2L1;GABPB1;GABPA;DNMT3A;SMARCA4;ZFX;SMAD4;ATM;EP300;CREBBP;PTEN;FOXO3	SST
416	KEGG_2021_Human__PI3K-Akt signaling pathway	0.209197	2.25478	0	0.0215297	0.439	91/276	18.57%	COL1A2;ITGA8;PRLR;HGF;EGFR;ITGA4;TNC;LPAR5;ANGPT1;LAMC3;TLR4;TGFA;TLR2;PIK3CG;ERBB4;FGF5;PKN3;LAMB2;MET;PDGFD;IL6R;PIK3R5;GNG5;SYK;PDGFRB;ITGB4;IL4R;LAMA4;LAMA3;BDNF;ITGA1;FGFR4;VTN;COL4A1;FGFR3;TNN;ITGAV;PDGFRA;COL9A3;PIK3AP1;COL4A2;FGF10;ITGA2;ITGA11;CDKN1A;THBS1;LAMC2;LAMA2;VWF;FGF18;GNG11;NGF;ERBB2;CHRM2;FLT1;ITGB8;SPP1;GHR;PDGFB;SGK3;FGFR1;CDK6;LAMA1;PIK3R2;ITGB5;JAK3;ITGA10;TNXB;LAMB4;KITLG…	SST
417	GO_Biological_Process_2023__Ribonucleoprotein Complex Biogenesis (GO:0022613)	-0.298412	-2.25266	0	0.00677554	0.34	78/116	45.20%	MRPL36;RPS15;MRPS12;RPS4X;RPS17;RPS19BP1;RPS16;RPS25;RRS1;RRP9;GRWD1;BOP1;RPS9;NOP16;RPL7;RPL26;RPS28;RPS11;BYSL;RPL11;SNU13;EMG1;RPS3A;RPS7;RPS27;RPL26L1;RPS13;TBL3;RPS8;RPS14;ZNF658;EBNA1BP2;RPS19;DHX37;WDR46;RPS23;RPL35A;RPS6;RPS5;RPL14;METTL17;ZNF622;UTP3;RPL38;RSL24D1;PES1;RPS15A;NIP7;NOL6;RPL5;GTF3A;SURF6;FBL;URB2;PNO1;NOC2L;RIOK2;RPS24;RRP36;SPPL2B;NOP56;NPM1;RIOK1;HEATR3;NGDN;RBIS;DNTTIP2…	SST
418	GO_Biological_Process_2023__Detection Of Chemical Stimulus Involved In Sensory Perception Of Taste (GO:0050912)	0.471487	2.25243	0.00507614	0.0214078	0.448	13/19	21.27%	TAS2R9;TAS2R46;GNAT2;TAS2R8;TAS2R43;PKD1L3;TAS2R13;TAS2R10;TAS2R19;TAS2R5;RTP5;TAS2R30;TAS2R14	SST
419	GO_Biological_Process_2023__Epithelial Cell Differentiation (GO:0030855)	-0.337047	-2.24733	0	0.00707338	0.356	35/72	22.91%	CRYGD;KDR;CCNO;OVOL3;DAB2;TAGLN2;RHCG;GRHL2;ASCL1;DNPH1;TST;E2F7;KRT17;MESP1;PLAAT3;KRT10;DEUP1;JAG1;PROX1;BDH2;TAGLN;LGALS3;FSTL1;EDF1;FGFR2;AKR1C2;VEGFA;OVOL2;E2F4;HSF4;PIH1D1;ALDOC;PCK2;PTER;GSTK1	SST
420	WikiPathway_2023_Human__Role Of Hypoxia Angiogenesis And FGF Pathway In OA Chondrocyte Hypertrophy WP5373	0.34506	2.24314	0	0.0223753	0.471	19/44	16.31%	ACAN;FOSB;RELB;FOSL2;FGFR4;FOSL1;FGFR3;COL10A1;SOX9;CEBPB;NGF;SPP1;CNMD;FGFR1;EPAS1;JUN;JUND;RUNX2;PRKCA	SST
421	WikiPathway_2023_Human__Cardiac Progenitor Differentiation WP2406	0.385069	2.24023	0	0.0223892	0.484	14/33	9.08%	TNNT2;CXCR4;INHBA;MESP2;PAX6;SOX1;ANPEP;LIN28B;ROR2;NRG1;PDGFRA;BMP1;POU5F1;NANOG	SST
422	WikiPathway_2023_Human__PI3K Akt Signaling Pathway WP4172	0.211394	2.23816	0	0.0220786	0.487	87/263	18.57%	COL1A2;ITGA8;PRLR;HGF;EGFR;ITGA4;TNC;LPAR5;ANGPT1;LAMC3;TLR4;TGFA;TLR2;PIK3CG;FGF5;PKN3;LAMB2;MET;PDGFD;IL6R;PIK3R5;GNG5;SYK;PDGFRB;ITGB4;IL4R;LAMA4;LAMA3;BDNF;ITGA1;FGFR4;VTN;COL4A1;FGFR3;TNN;ITGAV;PDGFRA;COL9A3;PIK3AP1;COL4A2;FGF10;ITGA2;ITGA11;CDKN1A;THBS1;LAMC2;LAMA2;VWF;FGF18;GNG11;NGF;CHRM2;FLT1;ITGB8;SPP1;GHR;PDGFB;SGK3;FGFR1;CDK6;LAMA1;PIK3R2;ITGB5;JAK3;ITGA10;TNXB;LAMB4;KITLG;TEK;ITGA9;L…	SST
423	WikiPathway_2023_Human__Hippo Merlin Signaling Dysregulation WP4541	0.268608	2.2336	0	0.0228461	0.505	40/104	18.94%	ITGA8;EGFR;ITGA4;CD44;ITGB2;MET;TEAD4;CDH12;CDH19;PDGFRB;ITGB4;YAP1;CDH6;LIN28B;ITGA1;FGFR4;FGFR3;ITGAV;PDGFRA;CDH22;ITGA2;ITGA11;AMOT;FLT1;ITGB8;ITGAL;FGFR1;CDH11;ITGB5;ITGA10;TEK;ITGA9;CDH7;PLCB4;ITGA5;ITGA6;CDH18;PAK6;WWTR1;STK3	SST
424	GO_Molecular_Function_2023__G Protein-Coupled Receptor Activity (GO:0004930)	-0.272486	-2.22819	0	0.00833892	0.411	59/155	16.30%	RXFP3;OPN1SW;P2RY1;DRD3;VIPR2;GPR149;QRFPR;GRM2;NPY;ADGRG6;GPR171;GPR87;P2RY6;KISS1R;P2RY13;GIPR;CX3CR1;S1PR3;GPR62;GPR17;MCHR1;NPFFR2;S1PR1;GPR151;TAS1R1;CYSLTR1;LGR5;GPR18;ADGRE3;GPER1;ADORA2B;GPR37L1;TRHR;PROKR2;C3AR1;HTR1E;GRM8;GPR143;CNR2;GPR183;GNRHR;MC1R;ADGRG5;GPR156;OPRM1;F2RL1;GPR26;TSHR;LPAR2;DRD1;ADGRE2;NPFFR1;S1PR2;ADGRE5;GPR34;P2RY12;OPN5;LTB4R;HCRTR1	SST
425	GO_Biological_Process_2023__Sensory Perception Of Bitter Taste (GO:0050913)	0.474722	2.22526	0.0025974	0.0236621	0.523	13/19	21.27%	TAS2R9;CALHM1;TAS2R46;GNAT2;TAS2R8;TAS2R43;TAS2R13;TAS2R10;TAS2R19;TAS2R5;RTP5;TAS2R30;TAS2R14	SST
426	GO_Molecular_Function_2023__G Protein-Coupled Peptide Receptor Activity (GO:0008528)	0.333943	2.21761	0.00287356	0.0245782	0.551	23/50	12.48%	EDNRA;GLP2R;OPRK1;NMUR1;SCTR;PTH1R;SORCS3;CRHR2;GALR1;FPR1;EDNRB;NPR3;GHRHR;SORCS1;MCHR2;GPR83;VIPR1;PTH2R;CRHR1;MAS1;PRLHR;OXTR;OPRD1	SST
427	GO_Biological_Process_2023__Ribosome Assembly (GO:0042255)	-0.380533	-2.21409	0	0.00930809	0.446	39/45	50.32%	EFNA1;RPS15;RPL10;RRS1;NOP2;PPAN;RPL6;RPLP0;RPS28;RPL11;C1QBP;ERAL1;RPS27;EIF6;MRPS7;RPS14;RPL23A;RPS19;DHX37;NOA1;RPS5;MRPS2;NOP53;RPSA;NGRN;RPL5;TRAF7;MRPL20;SBDS;MRPL22;NPM1;RRP7A;MRPS11;BRIX1;EIF2S1;RPS27L;RPF2;DDX3X;MTERF3	SST
428	KEGG_2021_Human__Diabetic cardiomyopathy	-0.268769	-2.21194	0	0.00944727	0.456	78/171	27.41%	TNNI3;NDUFA13;NDUFB10;TGFBR2;NDUFB8;NDUFA4L2;CYBA;NDUFA2;NDUFA7;COX4I1;ATP5F1D;NDUFB11;REN;ATP5MC1;COX8A;COX7C;NDUFA11;NDUFA6;COX7A1;NDUFS3;CYC1;SLC25A5;NDUFS7;ATP2A3;MMP9;PRKCD;PLN;PLCB2;COX6A1;NDUFC2;NDUFB7;COX5B;SDHD;GAPDH;NDUFA4;PPARA;ATP2A1;UQCR11;PPIF;UQCRQ;UQCR10;COX6B1;ATP5PO;NDUFB2;UQCRHL;ATP5PF;NDUFA3;ATP5MC3;MAPK11;COX7A2;NDUFB3;CTSD;NDUFS8;MAPK12;UQCRB;NDUFA1;CD36;CPT2;NDUFS5;ATP5F1B;…	SST
429	WikiPathway_2023_Human__Mitochondrial Complex III Assembly WP4921	-0.570057	-2.20507	0	0.0100424	0.478	11/15	26.95%	UQCC3;BCS1L;CYC1;UQCR11;UQCRQ;UQCR10;UQCRB;UQCRFS1;UQCRH;UQCC2;UQCRC1	SST
430	GO_Biological_Process_2023__Inflammatory Response (GO:0006954)	0.241266	2.19771	0	0.027787	0.607	45/135	14.92%	CHI3L1;AIF1;PTGDR;SIGLEC1;CD44;TLR6;PLA2G4B;TACR1;TLR4;TLR2;PIK3CG;NRROS;NOX4;CXCR4;ANXA1;ITGB2;GGT5;AGER;LYZ;CD96;RELB;FPR1;CMKLR1;CYBB;TMIGD3;CXCL13;TLR1;THBS1;CEBPB;HPR;CARD18;C5AR1;SLC11A1;ACKR1;TNFRSF1A;ADORA1;IL10RB;F11R;ITGAL;HSPG2;TAC4;NOD1;C5AR2;APOL2;GPR68	SST
431	GO_Molecular_Function_2023__RNA Endonuclease Activity, Producing 5'-Phosphomonoesters (GO:0016891)	-0.445731	-2.19715	0	0.0106588	0.504	20/27	38.63%	FEN1;POP5;ELAC1;EXO1;RPP21;POP7;NUDT16L1;RPP40;RPP25;POP4;APEX1;MRPL44;RNASEH1;DBR1;NUDT16;PLD6;ENDOV;ELAC2;RPP38;NUDT12	SST
432	GO_Biological_Process_2023__Cilium Movement (GO:0003341)	0.320337	2.1871	0	0.0289147	0.626	33/54	29.33%	TTC29;TEKT5;CLXN;TEKT1;TEKT3;TEKT2;DNAI1;ODAD3;CCDC63;DNAI3;SPAG6;RSPH6A;ODAD1;CFAP54;RSPH9;ROPN1L;CFAP53;CFAP100;DNAAF4;DNAH5;CCDC40;ODAD4;HYDIN;CFAP91;DNAH9;CFAP61;DNAH1;CFAP70;SPEF2;GAS8;DNAAF5;DNAI4;DNHD1	SST
433	GO_Biological_Process_2023__Cilium-Dependent Cell Motility (GO:0060285)	0.476332	2.17892	0.0049505	0.0301485	0.646	9/18	11.68%	TEKT5;DNAH8;TEKT1;TEKT3;TEKT2;DNAI3;DNAH3;CFAP54;RSPH9	SST
434	WikiPathway_2023_Human__Arrhythmogenic Right Ventricular Cardiomyopathy WP2118	0.304715	2.17344	0	0.0307273	0.657	37/68	27.79%	ITGA8;CACNG6;ITGA4;ACTN3;DSP;LEF1;ITGB4;GJA1;ITGA1;ITGAV;CACNG1;ITGA2;ITGA11;LAMA2;JUP;SGCG;PKP2;ITGB8;ACTN1;ITGB5;ITGA10;DSC2;ITGA9;ITGA5;ITGA6;ACTN2;CACNB2;LMNA;CACNG4;RYR2;CACNB1;SLC8A1;ACTN4;CACNB4;ITGA3;CDH2;CACNA1C	SST
435	GO_Biological_Process_2023__Positive Regulation Of Signal Transduction By P53 Class Mediator (GO:1901798)	-0.501679	-2.17316	0	0.0132229	0.588	16/19	40.96%	EIF5A;RPS15;HIC1;UBB;EEF1E1;CDK5RAP3;RPS7;MSX1;PLA2R1;RPL17;RPS20;HEXIM1;SPRED2;GET1;RPL37;SPRED1	SST
436	KEGG_2021_Human__Huntington disease	-0.236042	-2.17142	0	0.0132605	0.594	121/277	30.12%	POLR2J2;TUBB1;CREB3L4;NDUFA13;NDUFB10;NDUFB8;DNAH11;DCTN3;NDUFA4L2;TUBA3D;POLR2I;NDUFA2;NDUFA7;COX4I1;ATP5F1D;CREB3L3;NDUFB11;ATP5MC1;GPX2;COX8A;COX7C;NDUFA11;TP53;GPX3;NDUFA6;COX7A1;KLC3;NDUFS3;TUBB3;CYC1;SLC25A5;CREB5;NDUFS7;TUBA1A;BAX;PLCB2;COX6A1;POLR2G;NDUFC2;PSMC5;NDUFB7;COX5B;SDHD;ATG101;NDUFA4;POLR2J;AP2S1;POLR2K;UQCR11;PPIF;HIP1;TUBB6;UQCRQ;POLR2L;UQCR10;COX6B1;ATP5PO;NDUFB2;UQCRHL;CASP8…	SST
437	KEGG_2021_Human__Complement and coagulation cascades	0.3266	2.17092	0	0.0306668	0.662	24/48	18.65%	CR2;VSIG4;ITGB2;C1QA;C1QC;C1QB;PLAT;SERPINF2;TFPI;F13A1;VTN;C1R;F3;C5AR1;VWF;CR1L;F12;SERPIND1;PROS1;F5;PROCR;C2;C4BPA;SERPING1	SST
438	GO_Biological_Process_2023__Cellular Response To BMP Stimulus (GO:0071773)	0.32289	2.16808	0.00290698	0.0307776	0.671	21/52	16.47%	ADAMTS12;INHBB;TMEM100;GDF7;BMP3;SMAD6;INHBA;BMP6;BMP7;SOX9;BMPR1B;GDF9;HFE;SCX;TGFB2;TGFB3;ENG;TGFBR3;RUNX2;SMAD9;TGFB1	SST
439	GO_Biological_Process_2023__Positive Regulation Of Pathway-Restricted SMAD Protein Phosphorylation (GO:0010862)	0.369079	2.16559	0.00268097	0.0306001	0.676	16/36	13.35%	INHBB;GDF7;BMP3;INHBA;BMP6;GDF15;BMP7;TGFBR1;GDF9;BMP8A;HFE;TGFB2;TGFB3;BMP8B;ENG;TNXB	SST
440	MSigDB_Hallmark_2020__Cholesterol Homeostasis	-0.324804	-2.16548	0	0.0139916	0.624	50/70	41.68%	S100A11;AVPR1A;ANXA13;ALCAM;SEMA3B;CXCL16;JAG1;ATF5;EBP;PCYT2;CD9;LGALS3;ANXA5;ECH1;PMVK;PLAUR;FABP5;LDLR;ALDOC;HSD17B7;FBXO6;TMEM97;SCD;DHCR7;STARD4;ACTG1;NSDHL;SQLE;MVD;TRIB3;MVK;IDI1;ETHE1;FASN;ACAT2;TM7SF2;CYP51A1;FDPS;FDFT1;MAL2;HMGCS1;PNRC1;ERRFI1;GNAI1;FADS2;CLU;GUSB;LGMN;ABCA2;LSS	SST
441	GO_Biological_Process_2023__ATP Biosynthetic Process (GO:0006754)	-0.459337	-2.16511	0.00164745	0.0138951	0.624	21/24	44.34%	ATP5F1D;ATP5MGL;ATP5MC1;ATP5MF;ATP5ME;ATP5MJ;ATP5PO;ATP5PF;ATP5MC3;ALDOA;ATP5F1B;ATP5PD;ATP5F1E;ATP5MK;SLC25A13;ATP5PB;ATP5F1A;ATP5MG;ATP5MC2;NUDT2;VPS9D1	SST
442	WikiPathway_2023_Human__Focal Adhesion PI3K Akt mTOR Signaling Pathway WP3932	0.204312	2.15904	0	0.0315436	0.692	79/252	17.93%	COL1A2;ITGA8;PRLR;HGF;EGFR;ITGA4;TNC;LPAR5;ANGPT1;LAMC3;PIK3CG;COL5A1;LAMB2;ITGB2;MET;PDGFD;COL11A1;IL6R;PIK3R5;GNG5;PDGFRB;ITGB4;IL4R;LAMA4;LAMA3;FGFR4;VTN;COL4A1;FGFR3;TNN;ITGAV;PDGFRA;COL4A2;FGF10;ITGA2;ITGA11;CDKN1A;THBS1;LAMC2;LAMA2;VWF;FGF18;GNG11;NGF;COL11A2;CHRM2;FLT1;ITGB8;NOS1;SPP1;GHR;PDGFB;ITGAL;FGFR1;LAMA1;PIK3R2;ITGB5;JAK3;ITGA10;TNXB;EPAS1;KITLG;TEK;ITGA9;SLC2A1;LAMA5;FGF17;PPARGC1…	SST
443	GO_Molecular_Function_2023__Transforming Growth Factor Beta Binding (GO:0050431)	0.481065	2.15889	0	0.030994	0.692	11/17	17.12%	NRROS;WFIKKN1;ITGAV;THBS1;TGFBR1;LTBP2;VASN;TGFB3;ENG;TGFBR3;LTBP4	SST
444	GO_Biological_Process_2023__Ribosomal Small Subunit Biogenesis (GO:0042274)	-0.313177	-2.15866	0	0.0146458	0.651	57/81	46.16%	RPS15;MRPS12;RPS4X;RPS17;RPS19BP1;RPS16;RPS25;TSR3;RRP9;RPS9;RPS28;RPS11;SNU13;EMG1;RPS3A;ERAL1;RPS7;RPS27;RPS13;TBL3;MRPS7;RPS8;RPS14;RPS19;DHX37;WDR46;RPS23;RPS6;RPS5;METTL17;UTP3;NOB1;RPSA;RPS15A;NOL6;SURF6;FBL;PNO1;RIOK2;RPS24;RRP36;SPPL2B;NOP56;NPM1;RIOK1;NGDN;DNTTIP2;RRP7A;LTV1;UTP15;NOL7;MRPS11;WDR3;UTP11;MPHOSPH10;NOL11;FCF1	SST
445	GO_Biological_Process_2023__Regulation Of Neural Precursor Cell Proliferation (GO:2000177)	0.466346	2.15701	0	0.030867	0.695	12/18	23.48%	NES;TOX;INSM1;SHCBP1;ID2;TAFA1;DISP3;DLL4;TRIM71;LRRK2;KDM2B;SLC16A2	SST
446	WikiPathway_2023_Human__Enterocyte Cholesterol Metabolism WP5333	-0.416767	-2.15482	0.00164204	0.0150072	0.667	27/32	44.88%	ABCG8;MTTP;EBP;PMVK;ABCG5;LDLR;HSD17B7;CD36;DHCR7;NSDHL;SQLE;DHCR24;MVD;MVK;IDI1;DGAT1;ACAT2;MSMO1;TM7SF2;CYP51A1;FDPS;FDFT1;HMGCS1;SLC27A4;LSS;MGAT1;HMGCR	SST
447	GO_Cellular_Component_2023__Cell Projection Membrane (GO:0031253)	0.265928	2.14996	0	0.0321492	0.714	41/86	26.84%	SLC38A4;ACE2;SLC9A3;GPR161;SLC28A1;SYTL1;GPR157;DRD2;PDPN;CYBRD1;FSCN3;ARL13A;ITGAV;AQP8;EVC;SLC28A2;PTCH1;CNGB1;PDZK1;B4GALT1;CNGA4;ATP6V0A4;ANTXR1;PODXL;BBS5;PLB1;CUBN;SLC7A5;CDHR2;DMTN;SLC7A8;LIMA1;ADCY3;TCTN2;RAB35;PLEKHO1;SLC6A6;SLC22A5;SHANK2;ITGA3;PALM	SST
448	GO_Cellular_Component_2023__Basement Membrane (GO:0005604)	0.341229	2.14633	0	0.0323725	0.722	19/43	14.88%	TNC;NID2;SMOC2;LAMB2;SMOC1;NID1;LAMA4;LAMA3;VWA2;PXDN;COL4A1;COL4A2;LAMA2;COL23A1;LOXL2;USH2A;LAMA1;HSPG2;LAMA5	SST
449	GO_Biological_Process_2023__Protein Localization To Cell Junction (GO:1902414)	0.437884	2.14587	0.00787402	0.0319316	0.723	22/23	50.02%	DSP;CGNL1;TJP3;NPHS1;FERMT2;TJP2;HEG1;NECTIN1;NLGN1;DLG4;NLGN2;JAM3;JAK1;PAK2;TJP1;PCLO;STAU2;STAU1;KIF3A;BSN;ILF3;SHANK1	SST
450	WikiPathway_2023_Human__Cholesterol Metabolism With Bloch And Kandutsch Russell Pathways WP4718	-0.371961	-2.13968	0	0.0170851	0.716	38/45	49.92%	CH25H;SOAT2;EBP;PMVK;HSD17B7;ELOVL2;MYLIP;SCD;DHCR7;NSDHL;SQLE;ACOT2;DHCR24;MVD;NR1H2;MVK;IDI1;NR1H3;FASN;SREBF1;ACAT2;MSMO1;TM7SF2;CYP51A1;FDPS;FDFT1;HMGCS1;FADS2;ELOVL5;GGPS1;LSS;ABCG1;HMGCR;FADS1;CYP46A1;SC5D;ACSL1;SREBF2	SST
451	KEGG_2021_Human__Amoebiasis	0.277916	2.13767	0	0.0334829	0.747	30/69	21.77%	COL1A2;LAMC3;TLR4;TLR2;LAMB2;ITGB2;LAMA4;LAMA3;COL4A1;PLCB3;COL4A2;LAMC2;LAMA2;TGFB2;TGFB3;HSPB1;LAMA1;ACTN1;PIK3R2;LAMB4;LAMA5;GNAL;PLCB4;PRKCA;TGFB1;PRKCG;PRKCB;SERPINB9;GNA11;ADCY1	SST
452	GO_Cellular_Component_2023__Mitochondrial Envelope (GO:0005740)	-0.274497	-2.13569	0	0.017544	0.725	86/133	45.41%	NDUFA13;BLOC1S1;ABCB6;VRK2;TRIAP1;NDUFA2;FZD9;TIMM13;NDUFA6;GPER1;IKBKE;IFI27;NDUFS3;HAX1;TIMM10;SLC22A3;CHCHD2;NDUFB7;TIMM8B;SDHD;STOML2;PLEKHN1;ABCD1;PRELID1;HTRA2;IFI6;ARL2;IFI27L2;NME4;TIMM8A;CHCHD10;BOK;CHCHD4;SOD1;CHCHD5;SLC25A20;CYCS;NDUFA1;ATP5F1B;BNIP1;TMEM14B;ADAP2;NDUFAB1;TMEM70;COA4;OMA1;UQCC2;NDUFA8;COX17;SLC25A4;NAT8L;ACAD11;ARL2BP;TMEM14A;VDAC2;NGRN;TMEM14C;COA7;GATM;REXO2;NDUFAF4;…	SST
453	GO_Cellular_Component_2023__Mitochondrial Ribosome (GO:0005761)	-0.476956	-2.13313	0	0.0179109	0.735	19/22	42.62%	NDUFA7;MRPL34;MRPL28;MRPS12;MRPL51;MRPL40;MRPL57;MTG1;MRPL49;MRPL9;MRPL43;MRPL18;MRPL35;MRPS22;MRPL14;MRPL20;MRPL37;MRPS14;MTG2	SST
454	GO_Biological_Process_2023__BMP Signaling Pathway (GO:0030509)	0.327054	2.13144	0.00282486	0.034511	0.763	19/47	16.47%	INHBB;TMEM100;GDF7;BMP3;SMAD6;INHBA;BMP6;BMP7;BMPR1B;GDF9;HFE;SCX;TGFB2;TGFB3;ENG;TGFBR3;RUNX2;SMAD9;TGFB1	SST
455	GO_Biological_Process_2023__Energy Derivation By Oxidation Of Organic Compounds (GO:0015980)	-0.385935	-2.13059	0.00158479	0.0182345	0.742	24/38	31.32%	COX4I1;COX8A;COX7C;CYC1;NR4A3;COX6A1;COX5B;NDUFA4;MTLN;UQCR11;UQCRQ;UQCR10;COX6B1;COX7A2;CHCHD5;UQCRB;CYCS;COX5A;COX7B;UQCRH;MT3;UQCRC1;SLC25A13;COX15	SST
456	GO_Cellular_Component_2023__Golgi Lumen (GO:0005796)	0.306415	2.127	0.00286533	0.0348411	0.774	27/56	21.35%	GPC4;SDC4;WNT7B;GPC2;GPC3;PRELP;MUC13;RHBDF2;MUC4;PCSK6;NGF;GOLIM4;GPC5;PDGFB;SDC1;PCSK5;HSPG2;OMD;PROS1;WNT3;WNT7A;TGFB1;PDGFA;GPC6;MUC20;WNT5B;NCAN	SST
457	GO_Molecular_Function_2023__Receptor Ligand Activity (GO:0048018)	-0.255899	-2.12492	0	0.0190293	0.759	77/173	23.24%	SST;NMB;WNT16;WNT4;WNT9A;NRTN;DKK1;IL5;POMC;LEFTY1;VEGFC;GDF10;ANGPTL3;NPPC;IL11;IL18;VGF;GDF5;WNT11;SHH;IL33;NODAL;CD80;CCL5;METRNL;FGF20;CSF1;CLEC11A;BTC;PTHLH;FGF22;CRH;SEMA3B;WNT10A;GPNMB;GREM1;DPP4;PSPN;SEMA5A;HMGB2;FGF1;SEMA3C;MSTN;ARTN;GNRH1;ALKAL1;FGF8;CD70;WNT8A;ALKAL2;JAG1;MDK;CCK;VEGFB;BMP2;WNT5A;SEMA7A;GRN;INSL6;LGALS3;SFRP2;VIP;FGF2;METRN;VEGFA;EREG;HBEGF;CRLF1;COLEC10;NBL1;PGLYRP1;T…	SST
458	WikiPathway_2023_Human__RAS And Bradykinin Pathways In COVID 19 WP4969	0.505596	2.12453	0.0025974	0.0351009	0.781	8/15	12.00%	ACE2;AGT;ACE;CYP3A4;PRKG1;NOS1;VDR;F12	SST
459	GO_Biological_Process_2023__Regulation Of Kinase Activity (GO:0043549)	0.284091	2.12317	0	0.0348073	0.782	24/69	14.24%	ROS1;EGFR;ROR1;ERBB4;NLRC5;MERTK;MET;AXL;PDGFRB;EMP2;PLCE1;FGFR4;ROR2;FGFR3;PDGFRA;DRD4;CD4;ERBB2;CD74;FLT1;LDB2;FGFR1;TEK;NTRK3	SST
460	GO_Molecular_Function_2023__Transmembrane Receptor Protein Kinase Activity (GO:0019199)	0.383857	2.1216	0	0.0346955	0.785	16/29	21.19%	ROS1;EGFR;ROR1;ERBB4;MERTK;AXL;ROR2;PDGFRA;BMPR1B;ERBB2;FLT1;TEK;NTRK3;TYRO3;DDR2;FLT3	SST
461	GO_Molecular_Function_2023__Transforming Growth Factor Beta Receptor Binding (GO:0005160)	0.488187	2.11828	0	0.0350774	0.791	10/16	19.68%	SMAD6;SMAD3;TGFBR1;FERMT2;TGFB2;TGFB3;ENG;TGFBR3;TGFB1;SMAD7	SST
462	GO_Biological_Process_2023__Mitochondrial Cytochrome C Oxidase Assembly (GO:0033617)	-0.482694	-2.11779	0.00313972	0.0200795	0.781	18/20	45.41%	COX14;PET117;SCO2;COA3;SURF1;PET100;COA8;COX16;COX20;COX17;FASTKD3;TIMM21;COA5;SMIM20;TMEM223;COX19;COX18;STMP1	SST
463	GO_Biological_Process_2023__Positive Regulation Of Epithelial To Mesenchymal Transition (GO:0010718)	0.344671	2.11743	0.00255102	0.0347049	0.792	19/38	19.27%	AGT;LEF1;EMP2;PDPN;ZNF703;RGCC;GCNT2;SMAD3;TGFBR1;LOXL2;FERMT2;TGFB2;TGFB3;TNXB;TGFB1;BCL9L;AXIN2;WWTR1;EZH2	SST
464	KEGG_2021_Human__Cell adhesion molecules	0.244883	2.11693	0	0.0342339	0.793	57/113	27.69%	ITGA8;CLDN14;SDC4;CD86;SIGLEC1;ITGA4;HLA-DQB1;CLDN5;NCAM2;CD22;ITGB2;HLA-E;VSIR;PECAM1;SELPLG;ICAM1;CLDN2;LRRC4C;HLA-F;CD8B;CLDN11;ITGAV;SELL;CD34;CD4;CLDN15;HLA-B;ITGB8;CD58;CLDN10;SDC1;F11R;ITGAL;ITGA9;NECTIN1;CLDN4;IGSF11;ITGA6;NEGR1;CD226;PTPRM;NLGN1;LRRC4;CDH3;NECTIN2;PTPRF;NLGN2;NLGN3;CDH4;PVR;CNTNAP2;NRXN2;NRXN1;CADM1;LRRC4B;JAM3;CDH2	SST
465	GO_Biological_Process_2023__Macrophage Activation (GO:0042116)	0.407803	2.1131	0.00260417	0.034966	0.805	13/26	17.87%	AIF1;TLR4;ITGB2;C1QA;SYK;IFI35;TLR1;TMEM106A;C5AR1;SLC11A1;SBNO2;EHHADH;MYO1C	SST
466	KEGG_2021_Human__Focal adhesion	0.219176	2.11014	0	0.0350907	0.809	60/185	18.09%	COL1A2;ITGA8;HGF;EGFR;ITGA4;TNC;LAMC3;LAMB2;MET;MYL7;PDGFD;RAC2;PDGFRB;ITGB4;LAMA4;LAMA3;ITGA1;VTN;COL4A1;TNN;ITGAV;PDGFRA;COL9A3;COL4A2;ITGA2;ITGA11;THBS1;LAMC2;LAMA2;VWF;PARVG;MYL5;ERBB2;FLT1;ITGB8;SPP1;PDGFB;LAMA1;ACTN1;VASP;PIK3R2;ITGB5;ITGA10;TNXB;LAMB4;ITGA9;JUN;MYLK4;LAMA5;MYLK3;ITGA5;PRKCA;ITGA6;FLNA;PDGFA;MYLK;THBS4;CCND3;PRKCG;PAK6	SST
467	GO_Cellular_Component_2023__Membrane Raft (GO:0045121)	0.227898	2.10963	0	0.0346696	0.809	56/150	19.51%	MME;SERPINH1;EGFR;TLR6;ANGPT1;CHRNA3;ACE2;NTSR1;TLR2;ITGB2;CAVIN1;ATP1A4;LYN;EMP2;GJA1;SELPLG;LRP4;ANXA2;PDPN;RTN4RL2;KCNE3;TLR1;RIT2;ARID3C;EZR;CD4;FAS;TGFBR1;MAL;SKAP1;CAVIN2;NOS1;TNFRSF1A;TNFRSF1B;PROM2;ASAH2;CARD11;ATP2B4;AHNAK;RFTN1;LAT2;TEK;AKAP5;PLPP3;RAP2B;PSEN2;STOM;ARID3A;PPP2R1B;CLN6;MYO1C;PLSCR1;GP6;CHRNA7;CLN3;CD226	SST
468	GO_Biological_Process_2023__Detection Of Chemical Stimulus Involved In Sensory Perception Of Bitter Taste (GO:0001580)	0.45379	2.10915	0.00765306	0.0342951	0.811	12/18	21.27%	TAS2R9;TAS2R46;GNAT2;TAS2R8;TAS2R43;TAS2R13;TAS2R10;TAS2R19;TAS2R5;RTP5;TAS2R30;TAS2R14	SST
469	WikiPathway_2023_Human__Canonical And Non Canonical TGF B Signaling WP3874	0.467494	2.10545	0.00702576	0.034713	0.819	7/17	9.69%	LOXL4;LOX;LOXL1;BMP1;SMAD3;TGFBR1;LOXL2	SST
470	KEGG_2021_Human__Arrhythmogenic right ventricular cardiomyopathy	0.286244	2.10451	0.0030303	0.0344823	0.821	28/71	17.93%	ITGA8;CACNG6;ITGA4;ACTN3;DSP;LEF1;ITGB4;GJA1;ITGA1;ITGAV;CACNG1;ITGA2;ITGA11;LAMA2;JUP;SGCG;PKP2;ITGB8;LAMA1;ITGB5;ITGA10;DSC2;ITGA9;ITGA5;ITGA6;ACTN2;SLC8A2;CACNB2	SST
471	WikiPathway_2023_Human__Selenium Micronutrient Network WP15	-0.333416	-2.1037	0	0.0225062	0.817	35/58	33.84%	HBA1;ALB;PTGS1;SELENOM;PLG;KMO;GPX2;DIO1;PRDX2;GPX3;CAT;SERPINE1;PRDX5;SELENOW;ALOX5;GPX4;HBB;PRDX4;SELENOP;SEPHS2;MSRB1;SOD1;FLAD1;LDLR;SELENOS;RELA;PNPO;PRDX1;RFK;DIO2;SELENOK;SELENOH;TXN;PRDX3;CTH	SST
472	GO_Biological_Process_2023__Cellular Response To Transforming Growth Factor Beta Stimulus (GO:0071560)	0.265441	2.10125	0	0.0350185	0.834	38/86	24.09%	COL1A2;HPGD;CLDN5;NRROS;SMAD6;FOXH1;PTPRK;WNT2;GDF15;PDE3A;ZFP36L1;WFIKKN1;SOX9;APOA1;GCNT2;SMAD3;TGFBR1;GDF9;FERMT2;LTBP2;TGFB2;TGFB3;ENG;TGFBR3;ITGB5;JUN;WNT7A;SMAD9;TGFB1;PXN;SMAD7;MEF2C;PDE2A;ZMIZ1;GPI;SRC;SKI;SOX6	SST
473	GO_Biological_Process_2023__Regulation Of Platelet Aggregation (GO:0090330)	0.42153	2.10079	0.00246305	0.0346921	0.834	16/22	27.10%	MMRN1;EMILIN2;SYK;LYN;PDPN;PRKCQ;PRKG1;SERPINE2;F11R;MFSD2B;PRKCA;GP6;DMTN;IL6ST;JAK2;SH2B3	SST
474	GO_Cellular_Component_2023__Cell-Cell Junction (GO:0005911)	0.205316	2.0993	0	0.0346158	0.836	89/258	20.70%	KIRREL1;COL13A1;CLDN5;SHROOM4;PDLIM4;ANXA1;PTPRK;KIRREL3;CDH12;PGM5;VSIG10L2;DSP;SH3BP1;PDLIM1;CDH6;PECAM1;GJA1;TRPV4;CDC42EP1;VANGL2;CLDN2;ANXA2;HEPACAM;FGFR4;CLDN11;RASIP1;LLGL2;CDH22;GJB6;FLRT2;NPHS1;GJC2;GJC1;EZR;PDLIM5;JUP;CD53;PKP2;MARVELD2;FGFRL1;FERMT2;CLIC4;NIBAN2;PTK7;LDB3;TJP2;F11R;DCHS1;AHNAK;LIMD1;CDH11;ACTN1;B4GALT1;HEG1;MYO1E;DSC2;CDHR3;TEK;MSN;RND1;PLPP3;CNN3;RAP2B;CDH7;AJAP1;PDZD…	SST
475	GO_Biological_Process_2023__Negative Regulation Of Endothelial Cell Apoptotic Process (GO:2000352)	-0.504026	-2.09892	0.00338409	0.0231876	0.832	9/18	8.94%	NDNF;KDR;IL11;RAMP2;MAPK7;TNIP2;SERPINE1;CDH5;SEMA5A	SST
476	GO_Biological_Process_2023__Positive Regulation Of ERK1 And ERK2 Cascade (GO:0070374)	0.231956	2.08707	0	0.0371142	0.862	47/123	19.05%	HTR2C;CHI3L1;EGFR;ROR1;CD44;ANGPT1;ERBB4;AGER;PDGFD;NOTCH2;PDGFRB;ICAM1;ACKR3;SERPINF2;FGFR4;BMPER;THPO;ROR2;NRG1;FGFR3;PDGFRA;GCNT2;FGF10;ADCYAP1;CD4;AMH;C5AR1;PRXL2C;ARHGAP8;CD74;FERMT2;PDGFB;NECAB2;PTK2B;TEK;NTRK3;PRKD2;SCIMP;PTPN22;RASGRP1;PRKCA;TGFB1;PDGFA;FFAR4;SLC30A10;DDR2;CHRNA7	SST
477	KEGG_2021_Human__Alzheimer disease	-0.223428	-2.08375	0	0.0257094	0.854	138/326	30.12%	WNT16;WNT4;TUBB1;WNT9A;DKK1;IRS4;HRAS;NDUFA13;CALML4;NDUFB10;WNT11;GRIN2C;PSENEN;NDUFB8;NDUFA4L2;TUBA3D;NDUFA2;NDUFA7;COX4I1;ATP5F1D;CSF1;DDIT3;FZD9;NDUFB11;ATP5MC1;HSD17B10;COX8A;COX7C;NDUFA11;NDUFA6;COX7A1;WNT10A;FRAT1;KLC3;NDUFS3;TUBB3;CYC1;SLC25A5;NDUFS7;ATP2A3;TUBA1A;WNT8A;FRAT2;PLCB2;COX6A1;NDUFC2;PSMC5;NDUFB7;COX5B;LRP5;SDHD;ATG101;GAPDH;FADD;NDUFA4;WNT5A;ATP2A1;RYR3;APOE;CACNA1S;UQCR11;PP…	SST
478	GO_Biological_Process_2023__Regulation Of Pathway-Restricted SMAD Protein Phosphorylation (GO:0060393)	0.31921	2.07867	0.0027027	0.0386856	0.878	22/46	20.51%	INHBB;GDF7;BMP3;SMAD6;INHBA;BMP6;GDF15;BMP7;BMPER;TGFBR1;GDF9;BMP8A;HFE;TGFB2;TGFB3;BMP8B;ENG;TNXB;TGFB1;PPARG;SMAD7;RBPMS	SST
479	GO_Biological_Process_2023__Positive Regulation Of Osteoblast Differentiation (GO:0045669)	0.33244	2.07766	0.00253165	0.0384836	0.879	18/38	20.26%	HGF;FBN2;WNT7B;BMP6;IL6R;YAP1;BMP7;DNAI3;BMPR1B;FERMT2;CCNA2;PRKD1;RUNX2;SCUBE3;FFAR4;WWTR1;DDR2;MEF2C	SST
480	KEGG_2021_Human__Amyotrophic lateral sclerosis	-0.221139	-2.07375	0	0.0274583	0.877	175/323	42.40%	TUBB1;NDUFA13;NDUFB10;GRIN2C;NDUFB8;DNAH11;DCTN3;NDUFA4L2;TUBA3D;NDUFA2;NDUFA7;COX4I1;ATP5F1D;DDIT3;NDUFB11;ATP5MC1;GPX2;COX8A;COX7C;NDUFA11;TP53;GPX3;NDUFA6;COX7A1;CAT;KLC3;NDUFS3;TUBB3;CYC1;ALYREF;NDUFS7;TUBA1A;BAX;PFN4;COX6A1;NDUFC2;PSMC5;NDUFB7;COX5B;SDHD;ATG101;PFN1;NDUFA4;NXT1;NEFM;UQCR11;TUBB6;UQCRQ;DAXX;BAD;UQCR10;COX6B1;ATP5PO;NDUFB2;UQCRHL;CHCHD10;ITPR3;ATP5PF;ATF4;NDUFA3;XBP1;TUBB2A;AT…	SST
481	GO_Biological_Process_2023__Positive Regulation Of Mitochondrion Organization (GO:0010822)	-0.343987	-2.07116	0	0.0276222	0.879	33/54	37.15%	KDR;TNFSF10;TP53;GPER1;MGARP;MMP9;BAX;DCN;HRK;ZNF205;HTRA2;PPIF;BAD;AURKA;BAK1;CHCHD10;BOK;PLAUR;FIS1;BCL2L11;PGAM5;HIP1R;MOAP1;MUL1;MIEF1;PARK7;GSK3A;MIEF2;PLD6;MLLT11;BNIP3;PDCD5;BID	SST
482	GO_Biological_Process_2023__Regulation Of Mitochondrial Outer Membrane Permeabilization Involved In Apoptotic Signaling Pathway (GO:1901028)	-0.524673	-2.07085	0.00163666	0.0273727	0.88	13/16	32.15%	FZD9;SLC25A5;ZNF205;BAK1;CHCHD10;BOK;HIP1R;MUL1;GSK3A;SLC25A4;TMEM14A;SLC35F6;HSPA1A	SST
483	WikiPathway_2023_Human__Cholesterol Biosynthesis Pathway WP197	-0.525003	-2.07079	0.00162338	0.0270783	0.881	15/15	47.56%	PMVK;DHCR7;NSDHL;SQLE;MVD;MVK;IDI1;MSMO1;CYP51A1;FDPS;FDFT1;HMGCS1;LSS;HMGCR;SC5D	SST
484	KEGG_2021_Human__Calcium signaling pathway	0.211004	2.06966	0	0.0403188	0.893	82/198	23.34%	HTR2C;HTR4;HGF;MCOLN2;EDNRA;MCOLN3;EGFR;TACR1;NTSR1;CXCR4;SLC25A31;ERBB4;FGF5;MET;PDGFD;TRDN;ADRA1A;CD38;PDGFRB;ITPR2;EDNRB;PLCE1;FGFR4;FGFR3;PDGFRA;PTAFR;PLCB3;FGF10;CACNA1I;FGF18;NGF;CHRM5;HRH1;ERBB2;CHRM2;FLT1;NOS1;HTR6;TACR3;PDGFB;ADRB1;CACNA1H;OXTR;CAMK4;ATP2B4;FGFR1;PTK2B;PLCD4;PLCD3;NTRK3;MYLK4;MYLK3;FGF17;GNAL;RYR1;PLCB4;PHKG1;PRKCA;PDGFA;MYLK;SLC8A2;GRIN2D;PRKCG;PHKA1;CHRNA7;CAMK1D;PDE1A…	SST
485	GO_Biological_Process_2023__Ribosomal Large Subunit Biogenesis (GO:0042273)	-0.342611	-2.06895	0.00151286	0.027281	0.884	40/51	49.30%	RPL10;RRS1;NOP2;NOP16;PPAN;RPL6;RPLP0;RPL7;RPL26;RPL11;RPL26L1;EIF6;RPL23A;EBNA1BP2;RPL35A;RPL14;NOP53;ZNF622;RSL24D1;PES1;NIP7;RPL5;GTF3A;TRAF7;SURF6;MRPL20;NOC2L;NEDD4;MAK16;NPM1;HEATR3;PAK1IP1;SPATA5L1;CINP;MRTO4;BRIX1;NSA2;GTPBP4;TMA16;RPF2	SST
486	GO_Biological_Process_2023__Integrin-Mediated Signaling Pathway (GO:0007229)	0.268604	2.06783	0	0.0402674	0.895	28/75	16.70%	ITGA8;TXK;ITGA4;ITGB2;SYK;ITGB4;ITGA1;MYH9;ITGAV;COL16A1;FYB1;PRAM1;APOA1;ADAMTS1;ITGA2;ITGA11;ITGB8;FERMT2;ITGAL;ITGB5;ITGA10;PTK2B;PRKD1;ITGA9;PLPP3;LAMA5;ITGA5;ITGA6	SST
487	GO_Biological_Process_2023__ncRNA Processing (GO:0034470)	-0.282184	-2.06638	0	0.0274791	0.888	64/98	45.24%	RPP21;POP7;EXOSC4;INTS5;RPS15;NOC4L;RPS17;RPS16;RPS25;RRP9;TUT1;EXOSC5;PIH1D2;RPL7;RPL26;DDX54;RPS28;BYSL;RPL11;EMG1;WDR18;RPS7;RPS27;TSEN54;RPL27;PIH1D1;TSEN34;EBNA1BP2;WDR55;RPS19;POP4;RPL35A;LYAR;RPS6;DDX49;RPL14;NOP53;INTS13;PES1;NOB1;NOL6;RPL5;DCAF13;FBL;SBDS;RPS24;INTS11;RRP36;EXOSC2;SPPL2B;NOP56;NOLC1;INTS1;DKC1;INTS12;RRP7A;SSB;UTP15;KARS1;EXOSC7;MRTO4;INTS7;INTS2;ADAT1	SST
488	GO_Biological_Process_2023__Respiratory Chain Complex IV Assembly (GO:0008535)	-0.439718	-2.05998	0.00627943	0.0288079	0.897	20/24	45.41%	COX14;PET117;SCO2;COA3;SURF1;PET100;COA8;COX16;COX20;COX17;COX15;FASTKD3;TIMM21;COA6;COA5;SMIM20;TMEM223;COX19;COX18;STMP1	SST
489	GO_Molecular_Function_2023__Peptidase Inhibitor Activity (GO:0030414)	0.390948	2.05973	0.00746269	0.0419905	0.907	12/27	14.65%	SPINK2;TIMP1;GPC3;SERPINF2;TFPI;LPA;THBS1;ITIH2;ITIH4;A2ML1;SERPIND1;PROS1	SST
490	GO_Biological_Process_2023__Negative Regulation Of Endopeptidase Activity (GO:0010951)	0.329308	2.05851	0.00277778	0.0418611	0.908	14/36	13.39%	SERPINH1;SPINK2;TIMP1;TIMP4;SERPINA10;SERPINF2;VTN;NRG1;IFI16;SERPINI2;SERPINE2;SERPINF1;TIMP3;SERPIND1	SST
491	WikiPathway_2023_Human__Genes Controlling Nephrogenesis WP4823	0.35839	2.05806	0.00511509	0.0414731	0.909	12/30	11.64%	ITGA8;EMX2;CXCL12;KIRREL1;CXCR4;LAMB2;NOTCH2;PDGFRB;GLI3;NPHS1;PDGFB;ETV4	SST
492	GO_Biological_Process_2023__Endodermal Cell Differentiation (GO:0035987)	0.380122	2.05298	0	0.0424018	0.913	13/27	16.22%	ITGA4;INHBA;ITGB2;COL11A1;COL12A1;LAMA3;VTN;COL8A1;ITGAV;COL4A2;COL7A1;ITGB5;ITGA5	SST
493	WikiPathway_2023_Human__Nuclear Receptors In Lipid Metabolism And Toxicity WP299	0.413455	2.04927	0	0.0428686	0.914	13/22	19.88%	ABCB4;ABCC3;CYP3A4;NR1I3;RARA;ABCC2;VDR;RARG;RARB;CYP2E1;ABCA1;PPARG;PPARD	SST
494	GO_Biological_Process_2023__Response To Organic Cyclic Compound (GO:0014070)	0.336966	2.04653	0.00269542	0.0432122	0.915	16/40	14.03%	STING1;ABCB4;KYNU;ANXA1;DRD2;FGFR4;ALPL;CYP1B1;DRD4;GLDC;SOCS2;SPP1;IGFBP5;ESR1;ADORA1;TRPV1	SST
495	KEGG_2021_Human__TGF-beta signaling pathway	0.26554	2.04133	0	0.0442138	0.923	23/78	11.99%	INHBB;CDKN2B;GDF7;HAMP;SMAD6;INHBA;BMP6;ID3;BMP7;TGIF1;THSD4;SMAD3;THBS1;ID2;AMH;BMPR1B;TGFBR1;ID4;BMP8A;GREM2;TGFB2;TGFB3;BMP8B	SST
496	WikiPathway_2023_Human__Cholesterol Biosynthesis Pathway In Hepatocytes WP5329	-0.364805	-2.03622	0.00313972	0.034511	0.932	33/39	49.10%	CH25H;PLPP6;EBP;PMVK;HSD17B7;ELOVL2;MYLIP;SCD;NSDHL;ACOT2;DHCR24;MVD;NR1H2;MVK;IDI1;NR1H3;SREBF1;ACAT2;MSMO1;TM7SF2;CYP51A1;FDPS;FDFT1;HMGCS1;FADS2;ELOVL5;GGPS1;LSS;ABCG1;HMGCR;CYP46A1;SC5D;ACSL1	SST
497	GO_Biological_Process_2023__rRNA Metabolic Process (GO:0016072)	-0.293058	-2.03503	0	0.034423	0.932	54/85	41.96%	EXOSC4;RPS15;NOC4L;RPS17;RPS16;RPS25;RRP9;EXOSC5;PIH1D2;POLR1G;RPL7;RPL26;DDX54;RPS28;BYSL;RPL11;EMG1;WDR18;RPS7;RPS27;RPL27;PIH1D1;EBNA1BP2;WDR55;RPS19;POP4;RPL35A;TRIR;LYAR;RPS6;DDX49;RPL14;NOP53;SIRT7;PES1;NOB1;NOL6;RPL5;DCAF13;GTF3A;FBL;DEDD2;SBDS;RPS24;RRP36;EXOSC2;SPPL2B;NIFK;NOP56;NOLC1;DKC1;RRP7A;EXOSC6;UTP15	SST
498	KEGG_2021_Human__Hypertrophic cardiomyopathy	0.272561	2.03394	0	0.0460979	0.932	28/75	17.93%	ITGA8;TNNT2;CACNG6;ITGA4;EDN1;MYL3;AGT;ACE;ITGB4;ITGA1;ITGAV;CACNG1;ITGA2;ITGA11;LAMA2;SGCG;ITGB8;TGFB2;TGFB3;LAMA1;ITGB5;ITGA10;ITGA9;ITGA5;TGFB1;ITGA6;SLC8A2;CACNB2	SST
499	GO_Molecular_Function_2023__rRNA Binding (GO:0019843)	-0.34409	-2.03354	0	0.0344033	0.933	26/45	31.14%	TST;DDX28;RPL12;RRS1;RPS9;PPAN;RPLP0;RBM34;RPL11;EMG1;ERAL1;MRPL11;RPS13;MRPS7;RPS14;RPS5;MRPL16;NOP53;MRPL18;MRPS18A;NGRN;CIRBP;MRPS6;RPL5;RPL17;GTF3A	SST
500	GO_Molecular_Function_2023__Cytokine Receptor Activity (GO:0004896)	-0.341867	-2.03292	0	0.0342621	0.935	22/48	14.95%	IL31RA;IL2RB;IL5RA;CX3CR1;GPR17;IL13RA2;IL1RL2;IL17RE;IL12RB1;OSMR;CSF3R;IL13RA1;ACKR4;IL21R;IL11RA;GFRAL;IL10RA;IL1RAPL2;GFRA1;EPOR;IL1R1;EBI3	SST
501	WikiPathway_2023_Human__Allograft Rejection WP2328	0.308493	2.03099	0	0.0467462	0.934	16/46	9.93%	CASP7;CXCL12;CD86;HLA-DQB1;COL5A1;C1QA;C1QC;C1QB;HLA-E;HLA-F;GNLY;CXCL13;PDGFRA;VIM;FAS;HLA-B	SST
502	GO_Cellular_Component_2023__Cornified Envelope (GO:0001533)	0.471143	2.02934	0.00767263	0.0467766	0.935	9/15	13.66%	SCEL;DSP;TGM1;TCHH;JUP;HRNR;PKP2;FGFR1;DSC2	SST
503	GO_Molecular_Function_2023__Calcium Ion Transmembrane Transporter Activity (GO:0015085)	0.283331	2.02589	0	0.04739	0.939	27/64	20.82%	TRPA1;MCOLN2;MCOLN3;TRPM8;TRPV5;ITPR2;TRPV4;TRPM3;TRPC5;SLC24A4;ATP2C2;TRPC3;PKD1L3;UCP3;ATP2B4;TRPV1;PKD2L2;RYR1;SLC8A2;CACNB2;TRPC4;PKD1L1;SLC8B1;CHRNA7;PANX1;TPCN2;SLC24A3	SST
504	GO_Biological_Process_2023__Regulation Of B Cell Proliferation (GO:0030888)	0.357884	2.02458	0	0.047111	0.94	18/30	25.22%	MNDA;CD22;CD38;LYN;TNFRSF13C;NFATC2;NCKAP1L;IKZF3;AMH;BST1;CD74;MEF2C;BCL2;TNFSF13B;TIRAP;EPHB2;TNFRSF21;IRS2	SST
505	MSigDB_Hallmark_2020__Interferon Alpha Response	0.251871	2.02196	0	0.0473572	0.942	31/85	16.43%	IFITM2;IFIH1;DDX60;NMI;BST2;PARP9;PARP14;PSMB9;IL4R;GBP2;IFI44L;EPSTI1;IFI35;TXNIP;SELL;IL15;OAS1;LAMP3;IFITM3;CD74;PARP12;IRF9;IFIT3;MX1;DHX58;MOV10;ELF1;UBE2L6;IFIT2;MVB12A;PROCR	SST
506	MSigDB_Hallmark_2020__Estrogen Response Late	-0.247251	-2.02158	0	0.0374613	0.953	68/158	26.16%	MYB;FRK;TH;ZFP36;ISG20;KLK10;CYP26B1;ST6GALNAC2;PTGER3;CAV1;PTPN6;CCND1;IMPA2;CDH1;ASCL1;TST;SLC27A2;PLAC1;SEMA3B;GPER1;IGSF1;NPY1R;ACOX2;PLAAT3;CALCR;ETFB;GINS2;TPBG;UNC13B;NMU;CCNA1;MDK;DUSP2;CD9;SULT2B1;NXT1;HR;PCP4;PLXNB1;SGK1;PERP;HSPB8;PPIF;XRCC3;WFS1;CXCL14;BAG1;XBP1;OVOL2;DCXR;PDLIM3;RAB31;FOS;CA2;FABP5;NBL1;CKB;NAB2;AFF1;OPN3;LSR;GALE;BLVRB;BTG3;DHCR7;DNAJC12;OLFM1;DYNLT3	SST
507	GO_Biological_Process_2023__Negative Regulation Of Protein Polymerization (GO:0032272)	-0.421368	-2.02079	0.00337838	0.0373921	0.955	18/26	37.91%	CDH5;SLIT2;PRKCD;PFN1;SSH3;KANK3;STMN1;TWF2;KANK1;HIP1R;SNCA;TUBB4A;STMN2;CLIP3;PFN2;MYADM;TWF1;MAPRE1	SST
508	GO_Biological_Process_2023__Ventricular Cardiac Muscle Tissue Morphogenesis (GO:0055010)	0.396342	2.01715	0.0075188	0.0484327	0.948	13/24	19.68%	TNNT2;MYL3;DSP;NRG1;ZFPM2;TGFBR1;PKP2;TGFB2;ENG;TGFBR3;DLL4;TGFB1;SMAD7	SST
509	GO_Biological_Process_2023__Adherens Junction Organization (GO:0034332)	0.352646	2.01599	0.00515464	0.0482532	0.948	19/32	27.69%	CDH12;CDH6;CDH22;ZNF703;FERMT2;DCHS1;CDH11;CDHR3;CDH7;CDH18;SMAD7;CDH3;CDH26;CDH4;CDH8;CDH10;PIP5K1C;JAM3;CDH2	SST
510	GO_Biological_Process_2023__Response To Cytokine (GO:0034097)	0.236281	2.01209	0	0.0489324	0.952	48/107	25.93%	CHI3L1;MME;IFITM2;TIMP1;CXCR4;KYNU;ANXA1;FOXH1;BST2;IL6R;TIMP4;LEF1;RELB;IRAK3;XAF1;HCLS1;SELL;MX2;LDLRAP1;SLC11A1;LAMP3;SP100;IFITM3;NLRP12;CD74;ITIH4;TRIM56;ASAH2;MX1;JAK3;TIMP3;PRKCA;PLSCR1;IRAK2;SRF;PID1;IFNAR2;FLT3;PML;BCL2;MCL1;KHSRP;SRC;IL6ST;CALCOCO2;SLC22A5;JAK2;BCL2L1	SST
511	GO_Biological_Process_2023__Positive Regulation Of MAPK Cascade (GO:0043410)	0.193974	2.01119	0	0.0487514	0.952	66/225	15.28%	HTR2C;CHI3L1;CARTPT;EGFR;ROR1;CD44;ANGPT1;TLR4;EPGN;TGFA;PIK3CG;ERBB4;EDN1;AGER;PDGFD;NOTCH2;PIK3R5;TPD52L1;GDF15;GHRL;PDGFRB;ICAM1;ACKR3;PLCE1;SERPINF2;FGFR4;BMPER;THPO;ROR2;NRG1;FGFR3;PDGFRA;RIT2;ALOX12B;GCNT2;FGF10;TMEM106A;THBS1;ADCYAP1;DRD4;CD4;AMH;C5AR1;FGF18;PRXL2C;TGFBR1;ARHGAP8;PELI2;ERBB2;CD74;FLT1;FERMT2;TGFB2;GHR;GRM4;PDGFB;FGFR1;NECAB2;PTK2B;TEK;NTRK3;PRKD2;SCIMP;PTPN22;RASGRP1;BCAR3	SST
512	GO_Biological_Process_2023__Outer Dynein Arm Assembly (GO:0036158)	0.431935	2.00745	0.0025974	0.0494733	0.956	10/18	18.33%	CLXN;DNAH8;DNAI1;ODAD3;CCDC63;ODAD1;DNAAF8;DNAAF4;DNAH5;ODAD4	SST
513	WikiPathway_2023_Human__Translation Factors WP107	-0.343279	-2.00641	0	0.0419003	0.972	41/48	54.49%	EIF5A;EEF1B2;EIF4A1;EIF4EBP1;EIF3G;GSPT2;EIF6;EIF3I;EIF1AY;EIF1;EIF4A2;EEF2;EEF1A2;EIF2B4;EIF2B2;EEF1D;EEF1A1;CLUH;EIF3D;EIF4G1;EIF1AX;EIF2B5;EIF2S2;EIF3F;EIF5;EIF4H;EIF2S1;EIF4EBP2;EIF2S3;EIF3B;EIF2B1;EIF4B;ETF1;PAIP1;EIF2AK2;EIF4E;EIF2AK1;EIF3J;EIF3H;EIF3A;EIF3E	SST
514	GO_Biological_Process_2023__Positive Regulation Of MAP Kinase Activity (GO:0043406)	0.260276	2.00453	0	0.049705	0.96	34/76	23.00%	EGFR;TLR6;TLR4;EPGN;TGFA;PIK3CG;EDN1;PDGFD;PIK3R5;TPD52L1;PDGFRB;THBS1;DRD4;FGF18;ERBB2;FLT1;GHR;PDGFB;MAP3K5;FGFR1;NTRK3;RASGRP1;TGFB1;PDGFA;LRRK2;EZH2;MEF2C;TRAF2;TENM1;MAP3K10;FLT3;ERN1;DUSP19;DAB2IP	SST
515	GO_Biological_Process_2023__Positive Regulation Of Phospholipase C Activity (GO:0010863)	-0.392108	-1.99997	0.00164745	0.0439081	0.973	18/31	19.15%	HRAS;P2RY6;AVPR1A;ITK;KIT;GNA15;LPAR2;PLCB2;PHB1;HTR2A;HTR2B;SELE;PHB2;P2RY12;RASGRP4;FGF2;ADRA1D;LPAR1	SST
516	WikiPathway_2023_Human__Cholesterol Synthesis Disorders WP5193	-0.483099	-1.994	0.0017094	0.0456262	0.977	16/17	47.56%	EBP;PMVK;DHCR7;SQLE;DHCR24;MVD;MVK;IDI1;MSMO1;CYP51A1;FDPS;FDFT1;HMGCS1;LSS;HMGCR;SC5D	SST
517	GO_Biological_Process_2023__Regulation Of ERK1 And ERK2 Cascade (GO:0070372)	0.207252	1.99242	0	0.0530945	0.97	54/180	14.91%	HTR2C;CHI3L1;ROS1;EGFR;ROR1;CD44;ANGPT1;TLR4;ERBB4;AGER;PDGFD;CNKSR3;NOTCH2;SYK;PKHD1;LYN;PDGFRB;ICAM1;ACKR3;SERPINF2;FGFR4;BMPER;THPO;ROR2;NRG1;FGFR3;PDGFRA;GCNT2;FGF10;ADCYAP1;EZR;CD4;AMH;C5AR1;PRXL2C;EPHA4;ARHGAP8;ERBB2;CD74;FERMT2;PDGFB;TGFBR3;CCNA2;LMO3;NECAB2;TIMP3;PTK2B;TEK;NTRK3;EPHB1;PRKD2;SCIMP;PTPN22;RASGRP1	SST
518	GO_Biological_Process_2023__Positive Regulation Of Cell Junction Assembly (GO:1901890)	0.293613	1.99096	0.00810811	0.0530473	0.971	29/52	28.38%	CLDN5;ACE2;SYNDIG1;CUX2;AGT;GHRL;BDNF;IL1RAP;GPRASP3;NRG1;COL16A1;FERMT2;TEK;EPHB1;WNT7A;NLGN1;GRID2;NLGN2;SLITRK5;NLGN3;EPHB2;CNTNAP2;NRXN1;LRRC4B;NPHP4;LIMS1;NPHP1;DLG5;SLITRK3	SST
519	GO_Biological_Process_2023__Regulation Of Cytoplasmic Translation (GO:2000765)	0.403528	1.98919	0.00255754	0.0531768	0.972	22/22	59.71%	IGF2BP1;YBX3;RBM24;PARP16;UNK;FMR1;CPEB1;CPEB4;NMNAT2;HNRNPU;CPEB3;DHX36;HNRNPD;DHX9;CSDE1;PABPC1;PAIP1;CPEB2;YBX1;SYNCRIP;ZNF385A;PKM	SST
520	GO_Biological_Process_2023__Positive Regulation Of Tumor Necrosis Factor Superfamily Cytokine Production (GO:1903557)	0.281272	1.98676	0.00306748	0.0534314	0.973	20/60	11.74%	CD86;TLR4;IFIH1;TLR2;AGER;CLEC7A;SYK;HLA-E;LILRA2;OAS2;OAS3;TLR1;TMEM106A;THBS1;IL23A;AMH;OAS1;LY96;RIGI;HSPB1	SST
521	GO_Biological_Process_2023__Cell-Cell Adhesion Mediated By Cadherin (GO:0044331)	0.389283	1.98672	0	0.0529226	0.973	16/24	27.69%	CDH12;CDH6;CDH22;DCHS1;CDH11;CDHR3;CDH7;CDH18;CDH3;CDHR2;CDH26;CDH4;CDH8;CDH10;CTNND1;CDH2	SST
522	GO_Biological_Process_2023__Protein Targeting To Mitochondrion (GO:0006626)	-0.320895	-1.98105	0	0.049679	0.982	43/56	51.22%	NDUFA13;ROMO1;TIMM17B;TIMM13;MGARP;MTX1;TOMM22;TIMM10;TIMM8B;AIP;TIMM8A;CHCHD4;TSPO;FIS1;TOMM34;TOMM7;TOMM40;TOMM40L;BCAP31;TIMM44;TOMM5;DNAJC19;TIMM23B;HSP90AA1;TIMM22;TIMM21;TOMM20;TIMM10B;TIMM17A;GRPEL1;HSPD1;DNAJC15;TIMM50;MTCH1;AIFM1;PMPCA;SAMM50;TRMT10B;MFN2;HSPA4;FBXO7;TIMM9;MFF	SST
523	WikiPathway_2023_Human__TYROBP Causal Network In Microglia WP3945	0.294025	1.98064	0.00569801	0.0544387	0.976	19/49	11.38%	RGS1;BIN2;NRROS;ITGB2;C1QC;HCLS1;NCKAP1L;KCNE3;SLC1A5;TMEM106A;SLC7A7;RBM47;CD4;TGFBR1;ELF4;NCF2;SPP1;PPP1R18;TNFRSF1B	SST
524	GO_Biological_Process_2023__Activation Of Phospholipase C Activity (GO:0007202)	-0.442086	-1.97599	0.00509338	0.0511491	0.984	14/22	19.15%	P2RY6;AVPR1A;ITK;GNA15;LPAR2;PLCB2;PHB1;HTR2A;HTR2B;SELE;PHB2;P2RY12;RASGRP4;LPAR1	SST
525	WikiPathway_2023_Human__Type I Interferon Induction And Signaling During SARS CoV 2 Infection WP4868	0.382621	1.97419	0.00251889	0.0565131	0.98	10/25	11.78%	TLR6;TLR4;IFIH1;ACE2;TLR2;OAS2;OAS3;OAS1;RIGI;IRF9	SST
526	GO_Biological_Process_2023__Establishment Of Endothelial Barrier (GO:0061028)	0.375992	1.97392	0.00507614	0.0560345	0.98	10/25	14.82%	PECAM1;ICAM1;TJP3;EZR;MARVELD2;TJP2;F11R;RAPGEF3;MSN;RAP2B	SST
527	GO_Cellular_Component_2023__Mitochondrial Matrix (GO:0005759)	-0.210774	-1.9709	0	0.0527025	0.987	222/330	52.44%	ACSM4;PYCR1;NUDT1;HSD17B8;MPST;BLOC1S1;ACSS1;NDUFB8;ACSM6;ACSF2;SCO2;NDUFA7;TST;ATP5F1D;KRT17;MRPL34;GADD45GIP1;TWNK;MRPL28;HSD17B10;FDXR;CASQ1;ACADL;ISCA2;NDUFS3;PRDX5;ALKBH7;ETFB;ALDH1B1;MRPS12;NDUFS7;COASY;MRPL51;ACADS;SHMT2;PTCD1;GCDH;ALDH4A1;ACSM3;MTHFD2;LIPT1;TYMS;FDX2;HSPE1;IDH3B;ADHFE1;ARL2;ACAA2;PYCR2;MARS2;TBRG4;IDH3G;MRPL40;MRPL57;NUDT13;C1QBP;SMDT1;AMT;SUCLG2;ERAL1;MTG1;MRPL58;SOD1;QA…	SST
528	GO_Biological_Process_2023__rRNA Processing (GO:0006364)	-0.273284	-1.96924	0	0.0528578	0.987	64/99	45.65%	EXOSC4;RPS15;NOC4L;RPS17;RPS16;RPS25;TSR3;RRP9;EXOSC5;PIH1D2;NOP2;RPL7;RPL26;DDX54;RPS28;RPL11;SNU13;EMG1;NHP2;WDR18;RPS7;RPS27;EIF6;RPL27;PIH1D1;RPS14;EBNA1BP2;WDR55;RPS19;POP4;RPL35A;MRM1;LYAR;RPS6;DDX49;RPL14;NOP53;PES1;NOB1;NOL6;RPL5;DCAF13;FBL;SBDS;RIOK2;RPS24;NEDD4;RRP36;EXOSC2;MAK16;SPPL2B;NOP56;NOLC1;DKC1;RIOK1;RRP7A;TFB1M;UTP15;WDR3;EXOSC7;MRTO4;MPHOSPH10;NSA2;NOL11	SST
529	GO_Biological_Process_2023__Sensory Perception Of Smell (GO:0007608)	0.368376	1.96584	0.00520833	0.0590416	0.985	14/27	17.46%	OR12D1;OR2J3;OR2L8;SYT10;OR2M2;DRD2;NXNL2;SLC24A4;OR2M3;CNGB1;OR2L13;OR2L2;OR2L5;OR2L3	SST
530	GO_Cellular_Component_2023__Actin-Based Cell Projection (GO:0098858)	0.267024	1.96488	0.00289017	0.058856	0.985	28/69	17.90%	CD44;ANGPT1;PROM1;TRPV4;MYO3A;PDPN;FSCN3;IQGAP2;EZR;MYO1B;CLIC4;CD302;VIL1;PROM2;MYO1E;KITLG;RAPGEF3;TEK;MSN;SCIMP;MYO1D;TGFB1;PODXL;PDGFA;ACTN2;UNC5C;MYO1C;LRRK2	SST
531	GO_Biological_Process_2023__Sensory Perception Of Light Stimulus (GO:0050953)	-0.293797	-1.96437	0	0.0545089	0.993	24/71	12.46%	CRYGD;ZIC2;MYO7A;TH;USH1C;CABP4;RGS16;EFEMP1;GUCY2F;CRYBG3;TRPM1;SFRP5;WHRN;ROM1;GRM8;GPR143;POU6F2;PRPH2;DHRS3;RDH12;E2F1;RABGGTA;COL18A1;CRYBB2	SST
532	KEGG_2021_Human__Renin-angiotensin system	0.465035	1.96295	0.00987654	0.0589238	0.985	7/15	11.43%	MME;ACE2;AGT;ACE;ANPEP;ENPEP;MAS1	SST
533	KEGG_2021_Human__Primary immunodeficiency	-0.438498	-1.96133	0	0.0554827	0.995	14/22	24.12%	RFXANK;RAG2;CD40;ORAI1;PTPRC;BTK;RAG1;BLNK;TAP1;RFX5;IKBKG;CIITA;TAP2;ADA	SST
534	GO_Biological_Process_2023__Cell-Cell Junction Assembly (GO:0007043)	0.273976	1.96082	0	0.059109	0.985	30/61	27.69%	CLDN5;CDH12;CDH6;GJA1;TRPV4;GJB1;CLDN11;CDH22;ZNF703;GJB6;GJC1;JUP;PKP2;DCHS1;CDH11;CDHR3;CDH7;PRKCA;CDH18;SMAD7;CDH3;CDH26;CDH4;CDH8;CDH10;CTNND1;TLN1;PIP5K1C;JAM3;CDH2	SST
535	GO_Molecular_Function_2023__Cytokine Activity (GO:0005125)	0.257807	1.96032	0	0.0588636	0.986	29/70	17.38%	INHBB;CXCL12;GDF7;BMP3;TIMP1;INHBA;EDN1;WNT2;WNT7B;BMP6;WNT9B;GDF15;BMP7;CXCL13;NRG1;IL15;AMH;NDP;GDF9;BMP8A;TGFB2;TGFB3;BMP8B;KITLG;WNT3;WNT7A;TGFB1;WNT2B;IL16	SST
536	GO_Biological_Process_2023__Positive Regulation Of T Cell Proliferation (GO:0042102)	-0.342691	-1.95891	0.00303951	0.0562388	0.997	18/42	15.75%	HHLA2;ICOSLG;IL18;CD80;PTPRC;CCL5;PDCD1LG2;CD274;CD6;IL12RB1;IGFBP2;TNFSF9;CD70;FADD;EBI3;CD24;PNP;HLA-DPA1	SST
537	WikiPathway_2023_Human__Dopaminergic Neurogenesis WP2855	-0.475384	-1.95852	0.00341297	0.0558531	0.997	9/17	11.34%	TH;NKX2-2;DDC;SHH;ASCL1;SLC18A2;CDKN1C;NR4A2;FGF8	SST
538	GO_Biological_Process_2023__Extracellular Matrix Disassembly (GO:0022617)	-0.408117	-1.94926	0.008	0.0594947	0.998	13/26	15.65%	ADAMTS4;CAPG;PLG;KLK7;LCP1;ADAMTS15;NOXO1;HPN;ADAM8;MMP9;MMP15;WASHC1;MMP11	SST
539	GO_Biological_Process_2023__Positive Regulation Of Cell Differentiation (GO:0045597)	0.187618	1.94784	0	0.0633551	0.992	71/225	19.27%	HGF;MSR1;TMEM100;VWC2;LAMB2;FBN2;WNT7B;BMP6;IL6R;NID1;AGT;PKDCC;LEF1;YAP1;GJA1;NEUROD2;CMKLR1;RANBP3L;BMP7;PAX8;INSM1;SERPINF2;PDPN;ZFP36L1;PLA2G10;IGFBP3;ZNF703;SOX9;RGCC;GCNT2;DNAI3;SMAD3;CEBPB;MMD2;CD34;ID2;BOC;FRZB;LAMA2;NGF;BMPR1B;TGFBR1;NEUROD1;LOXL2;FERMT2;TGFB2;TGFB3;PPP1R13L;FGFR1;CCNA2;LAMA1;LMO3;TNXB;KITLG;PRKD1;PRKCH;RUNX2;SCUBE3;TGFB1;BCL9L;FFAR4;AXIN2;RBM24;RIN2;ACVR1;WWTR1;DDR2;SRF…	SST
540	GO_Biological_Process_2023__Positive Regulation Of Kinase Activity (GO:0033674)	0.24081	1.9472	0.00304878	0.0630771	0.992	33/91	18.85%	CARTPT;ROS1;EGFR;ROR1;ERBB4;MERTK;MET;AXL;PDGFRB;FGFR4;ROR2;FGFR3;PDGFRA;CDKN1A;MMD2;DRD4;CD4;ERBB2;CD74;FLT1;MAP3K5;FGFR1;CCNA2;PTK2B;TEK;NTRK3;CENPE;AXIN2;TYRO3;LRRK2;CAMKK1;ZNF16;DDR2	SST
541	GO_Biological_Process_2023__Triglyceride Homeostasis (GO:0070328)	-0.42122	-1.94488	0.00967742	0.0609445	1	12/23	18.98%	ANGPTL3;IL18;GPIHBP1;ANGPTL4;LCP1;LIPC;NR1H4;APOE;C1QTNF3;MTLN;XBP1;DGAT2	SST
542	MSigDB_Hallmark_2020__UV Response Dn	0.214636	1.94465	0	0.0634177	0.992	91/138	40.16%	CCN1;COL1A2;MET;COL11A1;NOTCH2;FBLN5;PDGFRB;GJA1;BDNF;ANXA2;TFPI;PMP22;BHLHE40;SMAD3;F3;NFIB;PDLIM5;RUNX1;SYNJ2;MT1E;ERBB2;IGFBP5;FHL2;TGFBR3;ATP2B4;INPP4B;PLPP3;PLCB4;PRKCA;COL5A2;NEK7;RXRA;PPARG;PTPRM;SMAD7;GRK5;VLDLR;RBPMS;SCHIP1;ZMIZ1;IRS1;MTA1;CACNA1A;MGMT;SIPA1L1;VAV2;PTPN21;PRKCE;ABCC1;LAMC1;KCNMA1;SLC7A1;CDON;SFMBT1;CELF2;MIOS;KALRN;ICA1;SYNE1;MAGI2;ACVR2A;IGF1R;AMPH;PEX14;PRKAR2B;TENT4A;…	SST
543	WikiPathway_2023_Human__Extrafollicular And Follicular B Cell Activation By SARS CoV 2 WP5218	-0.347786	-1.94439	0.00163132	0.0606467	1	21/40	20.25%	IRF8;ICOSLG;ITGAX;CD40;CD80;PTPRC;CR1;FOXO1;C3;CD82;GPR183;BLNK;ETS1;STAT5A;EBI3;TMSB10;PAX5;XBP1;ISG15;HSPA8;BCL6	SST
544	GO_Cellular_Component_2023__Sperm Flagellum (GO:0036126)	0.303623	1.94279	0.00859599	0.0636184	0.994	20/40	25.18%	TTC29;DNAJB13;TCP11;TACR1;TEKT5;DNAH8;TEKT3;CFAP65;CFAP58;CFAP74;RSPH6A;ATP2B4;QRICH2;DNAH1;RPGR;CFAP70;SPEF2;WBP2NL;CCDC181;SAXO2	SST
545	WikiPathway_2023_Human__Neovascularisation Processes WP4331	0.333226	1.94154	0.0025974	0.0636112	0.995	14/33	16.47%	CXCL12;ANGPT1;CXCR4;RELB;SMAD3;TGFBR1;TGFB2;PDGFB;TGFB3;KITLG;DLL4;SMAD9;NOTCH4;TGFB1	SST
546	GO_Cellular_Component_2023__Multivesicular Body Membrane (GO:0032585)	-0.456255	-1.93973	0.00513699	0.0622266	1	17/18	50.08%	PMEL;CHMP4A;CHMP2A;CD63;CHMP1A;CHMP6;CHMP1B;CHMP3;CHMP5;RAB27B;RAB27A;LAPTM4B;ATP13A2;CHMP2B;CHMP7;TMEM9;NSG2	SST
547	KEGG_2021_Human__Hematopoietic cell lineage	0.286096	1.93939	0.00906344	0.063888	0.995	18/51	10.06%	MME;CR2;ITGA4;CD44;HLA-DQB1;CD22;IL6R;CD38;IL4R;ANPEP;ITGA1;CD8B;THPO;ITGA2;CD5;CD34;CD4;CR1L	SST
548	GO_Biological_Process_2023__Establishment Of Protein Localization To Mitochondrion (GO:0072655)	-0.342861	-1.93886	0.00310559	0.0622686	1	29/42	41.35%	ROMO1;TIMM17B;TIMM13;MGARP;TOMM22;TIMM10;TIMM8B;AIP;CHCHD4;TSPO;FIS1;TOMM34;TOMM7;TOMM40;TOMM40L;BCAP31;TIMM44;TOMM5;DNAJC19;TIMM23B;AKT1;TIMM21;TOMM20;TIMM17A;GRPEL1;HSPD1;DNAJC15;PINK1;TIMM50	SST
549	WikiPathway_2023_Human__Ovarian Infertility WP34	0.351599	1.93263	0.00266667	0.0657494	0.996	11/28	15.62%	PRLR;MSH5;CYP19A1;DMC1;SMAD3;CEBPB;BMPR1B;GDF9;VDR;ZP3;RAD51	SST
550	GO_Biological_Process_2023__Cell-Cell Adhesion Via Plasma-Membrane Adhesion Molecules (GO:0098742)	0.216953	1.9297	0	0.0664828	0.996	58/144	21.55%	CLDN14;GPC4;CLDN5;FAT4;ITGB2;PTPRT;KIRREL3;CDH12;MYPN;PSG5;CDH6;PECAM1;PLXNB3;ICAM1;CLDN2;LRRC4C;CLDN11;CDH22;SELL;SDK1;PCDHB16;CLDN15;SDK2;PCDHA7;FGFRL1;PTK7;TGFB2;CLDN10;SCARF1;ITGAL;DCHS1;PCDHGC3;CDH11;HMCN2;UNC5D;CDHR3;CNTN6;CEACAM19;CDH7;PCDHB11;CNTN4;NECTIN1;CLDN4;IGSF11;CDH18;PLXNB2;NEXN;PTPRM;NLGN1;LRRC4;CDH3;NECTIN2;PTPRF;TENM1;PCDHB13;CDH26;GRID2;LRFN5	SST
551	GO_Biological_Process_2023__Positive Regulation Of Peptidyl-Tyrosine Phosphorylation (GO:0050731)	0.238055	1.92911	0	0.0662149	0.996	27/90	11.33%	HGF;CD44;ANGPT1;NOX4;ERBB4;BMP6;PARP9;IL6R;PARP14;AGT;ACE;LYN;PECAM1;VTN;HCLS1;FGFR3;TNFSF18;FGF10;IL23A;IL15;AMH;EPHA4;CASS4;CD74;TNFRSF1A;GHR;PDGFB	SST
552	GO_Biological_Process_2023__Positive Regulation Of Neuron Projection Development (GO:0010976)	0.244779	1.92805	0.00308642	0.0661182	0.996	34/85	23.00%	ZNF804A;ROR1;CUX2;TOX;LYN;GPC2;PLXNB3;BDNF;BMP7;GPRASP3;FZD1;ROR2;TNN;RIT2;EPHA3;PTK7;COBL;SCARF1;PTK2B;PRKD1;NTRK3;ITGA6;DDR2;PLXNB2;DBN1;CAMK1D;AVIL;NLGN1;VLDLR;P3H1;FUT9;STYXL1;TENM3;DAB2IP	SST
553	GO_Biological_Process_2023__Supramolecular Fiber Organization (GO:0097435)	0.192377	1.92802	0	0.0655947	0.996	57/226	13.49%	COL1A2;SERPINH1;ADAMTS14;LOXL4;SHROOM4;COL5A1;ADAMTS2;LOX;LOXL1;GFAP;COL11A1;TRDN;COL12A1;FBLN5;PGM5;LMOD3;DSP;SH3BP1;COL27A1;RAC2;NOSTRIN;MYO5B;EMP2;BFSP2;TRPV4;CGNL1;SERPINF2;PXDN;TLL1;HCLS1;KIF2C;CYP1B1;THSD4;BMP1;KIF14;TCHH;ADAMTS3;XIRP2;VIM;MYH11;TGFBR1;LOXL2;MYO1B;LMOD1;TMOD1;KLHL41;COL11A2;CCDC88C;SCX;LTBP2;TGFB2;MYO5C;CCDC88B;ACTN1;KIF24;TNXB;MYO1E	SST
554	GO_Biological_Process_2023__Negative Regulation Of Smoothened Signaling Pathway (GO:0045879)	0.380678	1.92695	0.00510204	0.0655431	0.996	11/24	18.06%	GPR161;ENPP1;KIF7;GPC3;GLI3;GLI2;PTCH1;RFX8;GLIS2;TULP3;KCTD21	SST
555	GO_Biological_Process_2023__Positive Regulation Of Defense Response To Virus By Host (GO:0002230)	0.394834	1.92583	0.00763359	0.0655785	0.996	9/21	14.81%	DTX3L;STING1;APOBEC3F;PARP9;IL23A;CGAS;RIGI;TRIM22;PTPN22	SST
556	GO_Biological_Process_2023__Regulation Of Angiogenesis (GO:0045765)	0.203551	1.92452	0	0.0656513	0.996	58/158	20.27%	CHI3L1;HK2;TNFAIP3;STAB1;CLDN5;PIK3CG;SMOC2;EMILIN2;FOXO4;GHRL;EMP2;ANXA3;BMPER;CXCL13;NRG1;CYP1B1;CD160;COL4A2;RGCC;ADAMTS1;SEMA3E;THBS1;CD34;VASH2;JUP;FGF18;RHOJ;RUNX1;SP100;SERPINF1;AMOT;ERBB2;FLT1;ITGB8;NIBAN2;TGFB2;HSPB1;ATP2B4;CNMD;HSPG2;RAPGEF3;TEK;PRKD1;PRKD2;CTSH;CEMIP2;PRKCA;ADGRB1;THBS4;BRCA1;ADGRA2;CHRNA7;PDCD6;PPARG;PTPRM;GLUL;VEGFD;PRKCB	SST
557	GO_Biological_Process_2023__Ribosomal Large Subunit Assembly (GO:0000027)	-0.435292	-1.9203	0.00506757	0.0704854	1	13/19	34.40%	DDX28;RPL10;RRS1;NOP2;PPAN;RPL6;RPLP0;RPL11;RPL23A;NOP53;RPL5;TRAF7;MRPL20	SST
558	GO_Biological_Process_2023__Inorganic Anion Transport (GO:0015698)	0.310205	1.91682	0.00854701	0.0685896	0.998	20/42	22.08%	NMUR1;CLCN1;SLC17A6;FXYD1;CLIC1;ENPP1;SLC26A1;SLC26A7;SLC17A7;SLC11A1;GLRA1;BEST1;CLIC4;ANO7;ENPP3;ANO6;SLC26A5;TTYH3;RACGAP1;SLC26A11	SST
559	KEGG_2021_Human__Pathways of neurodegeneration	-0.197171	-1.91165	0	0.0747108	1	168/421	29.86%	WNT16;WNT4;TUBB1;WNT9A;DKK1;HRAS;NDUFA13;CALML4;NDUFB10;WNT11;GRIN2C;NDUFB8;DNAH11;DCTN3;NDUFA4L2;TUBA3D;NDUFA2;NDUFA7;COX4I1;ATP5F1D;CSF1;DDIT3;FZD9;NDUFB11;ATP5MC1;HSD17B10;GPX2;COX8A;COX7C;NDUFA11;GPX3;NDUFA6;COX7A1;CAT;WNT10A;RPS27A;FRAT1;KLC3;NDUFS3;TUBB3;CYC1;SLC25A5;NDUFS7;ATP2A3;TUBA1A;BAX;WNT8A;FRAT2;PLCB2;COX6A1;NDUFC2;PSMC5;NDUFB7;COX5B;UBB;LRP5;SDHD;ATG101;FADD;NDUFA4;WNT5A;ATP2A1;RYR…	SST
560	GO_Biological_Process_2023__Negative Regulation Of Supramolecular Fiber Organization (GO:1902904)	-0.292257	-1.91032	0	0.0747963	1	38/68	39.16%	SPEF1;CDH5;CAV3;CIB1;SLIT2;PRKCD;PFN1;CORO1A;APOE;SSH3;MID1IP1;PLEKHH2;CHADL;KANK3;STMN1;TWF2;KANK1;PFDN6;HSPA8;HIP1R;LDLR;SNCA;TUBB4A;PFDN2;PFDN5;ARPIN;CRYAB;STMN2;CLIP3;PFN2;VBP1;MYADM;TWF1;APC2;KATNB1;ARHGEF2;MAPRE1;CLU	SST
561	MSigDB_Hallmark_2020__UV Response Up	-0.241308	-1.90793	0.001443	0.075632	1	96/145	44.54%	FEN1;HTR7;ONECUT1;SLC6A12;C4BPB;HYAL2;TST;SPR;GPX3;CDKN1C;ATP6V1F;SELENOW;IGFBP2;JUNB;GCH1;PRKCD;TAP1;CCK;BMP2;AP2S1;PPIF;GRINA;BAK1;BTG2;MRPL23;PDLIM3;ALDOA;TUBA4A;EPCAM;BCL2L11;FOS;CA2;SLC6A8;ASNS;UROD;MSX1;CDC34;NR4A1;PSMC3;CYB5R1;BTG3;DNAJA1;GGH;ENO2;OLFM1;CNP;SLC25A4;PTPRD;RET;PARP2;MAOA;RXRB;WIZ;CLCN2;KLHDC3;FURIN;NPTXR;FKBP4;ABCB1;ARRB2;POLE3;YKT6;DGAT1;IRF1;ACAA1;NXF1;RHOB;CLTB;SIGMAR1;AL…	SST
562	GO_Cellular_Component_2023__Organelle Envelope Lumen (GO:0031970)	-0.299358	-1.90528	0.00296296	0.0764534	1	35/62	36.57%	BLOC1S1;TRIAP1;TIMM13;ALOX5;HAX1;TIMM10;CHCHD2;NDUFB7;TIMM8B;STOML2;PRELID1;HTRA2;ARL2;NME4;TIMM8A;CHCHD10;TUBB2A;CHCHD4;SOD1;CHCHD5;CYCS;COA4;UQCC2;NDUFA8;COX17;ARL2BP;PLAAT1;COA7;GATM;REXO2;PRELID3B;COA6;SORL1;TIMM10B;CPOX	SST
563	GO_Biological_Process_2023__Axon Guidance (GO:0007411)	0.208775	1.89678	0	0.077723	1	48/139	20.10%	ANOS1;CXCL12;SEMA3D;PLEKHG4B;SEMA3F;MYPN;NOTCH2;SEMA5B;EFNB1;PLXNB3;BDNF;UNC5B;PLA2G10;SLIT1;PRKCQ;SEMA6D;EPHA3;SEMA3E;PLEKHG4;DRAXIN;PLXNA4;BOC;NFIB;SEMA3A;EPHA4;NTN1;LRTM2;GLI2;NIBAN2;NELL2;ARHGEF25;EPHA6;VASP;CNTN6;EPHB1;CNTN4;SEMA4A;UNC5A;UNC5C;EPHA10;PLXNB2;ARHGEF40;NEXN;PTPRM;PLXNA1;EPHA7;PTPRO;RPS6KA5	SST
564	GO_Biological_Process_2023__Mitotic Cytokinetic Process (GO:1902410)	-0.471525	-1.89632	0.00527241	0.081097	1	14/16	45.97%	KLHDC8B;CHMP4A;CHMP2A;VPS4A;CHMP1A;CNTROB;RHOA;CHMP6;CHMP1B;CHMP3;CHMP5;MITD1;CHMP2B;CHMP7	SST
565	KEGG_2021_Human__RNA polymerase	-0.364624	-1.89461	0.00488599	0.0814664	1	29/31	55.99%	POLR2J2;POLR3GL;POLR2I;POLR2G;POLR2J;POLR2K;POLR2L;POLR3K;POLR1E;POLR1H;POLR3D;POLR2C;POLR2E;POLR1C;POLR1F;POLR3C;POLR2F;POLR2D;POLR2H;POLR3G;POLR3E;POLR2B;POLR3F;POLR1B;POLR2A;POLR1D;POLR3B;POLR3A;POLR1A	SST
566	GO_Biological_Process_2023__Regulation Of Interleukin-4 Production (GO:0032673)	0.411095	1.89397	0	0.0784899	1	11/18	20.54%	CD86;SYK;HLA-E;LEF1;PRKCQ;CEBPB;RARA;ZP3;SLC7A5;TNFSF4;HAVCR2	SST
567	GO_Molecular_Function_2023__Serine-Type Endopeptidase Activity (GO:0004252)	-0.289878	-1.89094	0.00291971	0.083202	1	26/64	17.35%	CELA2A;PRTN3;PRSS53;RHBDF1;PRSS48;MASP1;PROC;GZMM;OVCH2;PRSS12;PLG;HPN;DPP4;PARL;ADAM8;MMP9;F10;CELA2B;PRSS36;PRSS3;TLL2;HTRA2;PCSK1;MMP11;APEH;MASP2	SST
568	WikiPathway_2023_Human__Osteoblast Differentiation And Related Diseases WP4787	0.229904	1.89061	0.00323625	0.0795031	1	40/103	21.18%	FZD8;PIK3CG;FGF5;PIK3C2G;WNT2;WNT7B;NOTCH2;PIK3R5;WNT9B;HEY2;GLI3;FGFR4;FZD1;PRKCQ;FGFR3;SOX9;FGF10;FGF18;BMPR1B;MAPK4;GLI2;PTCH1;FGFR1;PIK3R2;PRKD1;PRKCH;WNT3;RUNX2;DLL4;WNT7A;SMAD9;NOTCH4;PRKCA;WNT2B;PRKCG;FZD4;PPARG;PRKCB;WNT5B;MAPK13	SST
569	GO_Molecular_Function_2023__Double-Stranded RNA Binding (GO:0003725)	0.265483	1.88999	0.00611621	0.0792483	1	46/57	49.71%	IGF2BP1;IFIH1;DDX60;OAS2;OAS3;ADARB2;OAS1;VIM;RIGI;DDX60L;DHX58;RFTN1;ACTN1;MSN;DUS2;ZFR2;PRKRIP1;ELAVL1;ZNF346;DHX30;SUPV3L1;APTX;ADAR;AGO1;HNRNPU;RC3H1;ZFR;STAU2;AGO3;DHX36;MTDH;DICER1;MBNL1;RC3H2;DHX9;DHX15;LRRFIP1;ADARB1;AGO2;STRBP;AGO4;EIF2AK2;CLTC;PRKRA;TFRC;ILF3	SST
570	GO_Biological_Process_2023__Inorganic Cation Import Across Plasma Membrane (GO:0098659)	0.232948	1.88494	0	0.0805424	1	39/92	23.68%	SLC12A7;SCNN1B;SLC9A3;KCNJ2;TRPV5;SCN7A;SLC39A12;ATP1A4;NALF2;KCNJ1;TRPV4;SLC24A4;AQP8;CACNA1I;SLC9C1;KCNJ10;FXYD2;ABCC9;KCNK9;ATP1A2;SLC9C2;CACNA1H;ATP2B4;SLC39A8;TRPV1;KCNJ14;SCN11A;SLC9A5;SLC12A1;SLC8A2;KCNJ9;SLC12A8;CACNA1G;SLC9A1;KCNH2;CACNA1E;KCNJ3;CACNA1A;KCNJ6	SST
571	GO_Biological_Process_2023__Potassium Ion Transmembrane Transport (GO:0071805)	0.217114	1.88183	0	0.0809377	1	46/118	20.93%	KCNK18;SLC12A7;KCNS3;KCNS1;SLC9A3;KCNJ2;ATP1A4;KCNH8;LRRC38;KCNJ1;KCNG3;KCNE3;SLC24A4;SLC1A3;KCNG1;SLC9C1;KCNJ10;FXYD2;KCNT2;ABCC9;KCNA1;KCNN4;KCNK9;ATP1A2;SLC9C2;KCNH5;KCNK13;KCNN3;KCNK10;KCNJ14;KCNC3;KCNQ5;KCNN2;SLC9A5;SLC12A1;KCNH1;KCNN1;KCNIP2;KCNH3;KCNQ4;HCN3;KCNJ9;SLC12A8;SLC24A3;KCNK3;SLC9A1	SST
572	GO_Biological_Process_2023__Mammary Gland Development (GO:0030879)	0.430338	1.8797	0.00753769	0.0815627	1	9/16	16.23%	ERBB4;WNT2;WNT7B;NRG1;GLI2;TGFB3;OXTR;WNT3;NOTCH4	SST
573	GO_Molecular_Function_2023__Endopeptidase Inhibitor Activity (GO:0004866)	0.259565	1.87962	0	0.0809891	1	21/64	14.65%	SERPINH1;SPINK2;TIMP1;BST2;TIMP4;SERPINA10;ANXA2;SERPINF2;TFPI;LPA;NRG1;THBS1;NGF;SERPINI2;ITIH2;SERPINE2;SERPINF1;ITIH4;TIMP3;SERPIND1;PROS1	SST
574	KEGG_2021_Human__Proteasome	-0.325574	-1.879	0.0015748	0.0901275	1	38/43	57.74%	PSMB10;PSMB8;PSME2;PSMC5;PSME1;PSMB6;PSMD8;PSMA7;PSMC3;PSMB5;PSMB4;ADRM1;PSMD2;PSMB3;PSMD9;PSMD7;PSMC4;PSME3;PSMA4;PSMA6;POMP;PSMC1;PSMD4;PSME4;PSMD3;PSMD13;PSMA3;PSMD6;PSMA5;PSMC6;PSMA1;PSMB1;PSMC2;PSMB2;PSMD12;PSMD11;PSMB7;PSMD14	SST
575	GO_Molecular_Function_2023__Alcohol Dehydrogenase (NADP+) Activity (GO:0008106)	-0.479934	-1.87875	0.00674536	0.0895765	1	13/15	39.96%	AKR1D1;DHRS3;RDH12;RDH14;AKR1C2;AKR1C3;AKR1C1;DHRS4;AKR1B1;AKR7A2;DHRS7;RDH13;RDH11	SST
576	WikiPathway_2023_Human__TGF Beta Receptor Signaling WP560	0.285204	1.87729	0.00775194	0.0816829	1	16/44	16.47%	SMAD6;INHBA;FOXH1;LEF1;TGIF1;ZNF423;SMAD3;THBS1;TGFBR1;SPP1;ENG;TGFBR3;JUN;RUNX2;SMAD9;TGFB1	SST
577	GO_Molecular_Function_2023__Protein Tyrosine Kinase Activity (GO:0004713)	0.238687	1.87711	0.00284091	0.081177	1	25/82	14.24%	TXK;ROS1;EGFR;ROR1;ERBB4;MERTK;MET;SYK;PKDCC;LYN;AXL;PDGFRB;ROR2;FGFR3;PDGFRA;MELK;EPHA4;ERBB2;FLT1;YES1;FGFR1;JAK3;PTK2B;TEK;NTRK3	SST
578	KEGG_2021_Human__Alcoholism	-0.255514	-1.87603	0.00143266	0.0906812	1	51/117	29.17%	H3C1;H2AC8;NPY;TH;H2BC4;CREB3L4;H2AC15;HRAS;DDC;GNG3;H2BC11;CALML4;GNG12;GRIN2C;GNG8;H2BC15;SLC18A2;CREB3L3;CRH;ADORA2B;H2BC21;CREB5;DRD1;GNG10;H4C8;SLC29A2;ATF4;PPP1R1B;H2AC6;SHC4;H4C5;CREB3;H2AZ1;GNB2;CREB3L1;H2BC18;GNB4;SHC1;H2AJ;GNB3;GRIN3A;H3-3B;H4C3;CALM3;CALM2;HDAC9;PPP1CA;ARAF;MAPK3;MAOA;HDAC10	SST
579	MSigDB_Hallmark_2020__TNF-alpha Signaling via NF-kB	-0.229259	-1.87501	0	0.0907169	1	74/167	25.64%	HES1;PHLDA2;PLEK;EGR2;ZFP36;SPHK1;OLR1;ICOSLG;DUSP5;IL18;TRIB1;BCL3;EFNA1;CD80;CCND1;TNFAIP6;PTGER4;CCL5;PTX3;CSF1;TNIP2;TNFAIP2;TNFRSF9;G0S2;SERPINE1;GPR183;NR4A2;LAMB3;F2RL1;JUNB;NFKBIE;GCH1;NR4A3;TAP1;TNFSF9;JAG1;DUSP4;BMP2;DUSP2;SGK1;STAT5A;PMEPA1;FJX1;YRDC;SLC16A6;LITAF;BTG2;IER3;VEGFA;TUBB2A;TRAF1;HBEGF;PLAUR;BIRC3;FOS;KLF6;EHD1;BCL6;PDE4B;PER1;LDLR;SNN;RCAN1;IER2;DUSP1;GADD45A;NR4A1;EGR1;P…	SST
580	KEGG_2021_Human__Dilated cardiomyopathy	0.243106	1.87315	0.003003	0.0819377	1	44/80	32.36%	ITGA8;TNNT2;CACNG6;ITGA4;MYL3;AGT;ITGB4;ITGA1;ITGAV;CACNG1;ITGA2;ITGA11;LAMA2;SGCG;ITGB8;TGFB2;ADRB1;TGFB3;LAMA1;ITGB5;ITGA10;ITGA9;ITGA5;TGFB1;ITGA6;SLC8A2;CACNB2;ADCY1;ADCY8;LMNA;CACNG4;RYR2;ADCY3;CACNB1;SLC8A1;CACNB4;ITGA3;CACNA1C;DMD;CACNG3;ADCY9;CACNG7;CACNG2;SLC8A3	SST
581	GO_Biological_Process_2023__Secondary Alcohol Biosynthetic Process (GO:1902653)	-0.415885	-1.8726	0.00513699	0.0914778	1	18/22	44.88%	PLPP6;PMVK;HSD17B7;DHCR7;INSIG1;NSDHL;ACLY;DHCR24;MVD;MVK;MSMO1;TM7SF2;CYP51A1;FDFT1;HMGCS1;LSS;ARV1;HMGCR	SST
582	GO_Biological_Process_2023__Defense Response To Gram-positive Bacterium (GO:0050830)	-0.367438	-1.86808	0.00967742	0.0932686	1	14/31	14.32%	CASP4;GBP7;GBP6;DEFB135;H2BC11;ROMO1;IL18;RARRES2;H2BC21;HMGB2;MYD88;RNASE1;FAU;GBP4	SST
583	GO_Biological_Process_2023__Calcium-Mediated Signaling Using Intracellular Calcium Source (GO:0035584)	-0.453733	-1.86677	0.0066335	0.0933725	1	9/17	19.42%	PTGFR;KDR;PTPRC;AZU1;GPR143;STIMATE;SELP;FKBP1B;FIS1	SST
584	GO_Biological_Process_2023__G Protein-Coupled Receptor Signaling Pathway, Coupled To Cyclic Nucleotide Second Messenger (GO:0007187)	-0.336212	-1.86647	0.00642055	0.0928467	1	17/38	13.80%	NPY;HTR7;HTR1B;PTGIR;HTR1D;NPY1R;HTR1E;CNR2;HTR1A;MC1R;OPRM1;TSHR;DRD1;CHRM4;HTR2A;HTR2B;HRH4	SST
585	WikiPathway_2023_Human__GPCRs Other WP117	-0.290422	-1.86633	0.00293255	0.0922612	1	24/59	16.28%	RXFP3;DRD3;PTGFR;HTR7;P2RY13;GPR62;GPR17;S1PR1;GPR18;ADGRE3;OR7A17;PROKR2;GRM8;GPR143;GPR183;GNRHR;OR3A3;ADGRE2;HTR2A;OR2M4;HRH4;SMO;OR10A2;CCKBR	SST
586	GO_Cellular_Component_2023__Small-Subunit Processome (GO:0032040)	-0.282581	-1.86632	0.00469484	0.091577	1	46/70	46.16%	RPS27A;MRPS12;NOC4L;RPS4X;RPS17;RPS19BP1;RPS16;RRP9;RPS9;FBLL1;RPS28;RPS11;SNU13;EMG1;RPS3A;RPS7;RPS27;RPS13;TBL3;RPS8;RPS14;RPS19;DHX37;WDR46;RPS23;RPS6;RPS5;UTP3;RPS15A;NOL6;DCAF13;FBL;PNO1;RPS24;SPPL2B;NOP56;NGDN;PDCD11;DNTTIP2;RRP7A;UTP15;NOL7;WDR3;UTP11;MPHOSPH10;FCF1	SST
587	GO_Biological_Process_2023__Phosphatidylinositol-Mediated Signaling (GO:0048015)	0.270247	1.86214	0.00301205	0.0870872	1	20/57	17.39%	PIK3CG;EDN1;PIK3C2G;PIK3R5;PDGFRB;PLCE1;ZFP36L1;PDGFRA;PTAFR;CD160;PLCB3;EZR;ERBB2;FGFR1;PIK3R2;PLCH2;NYAP2;PLCB4;KCNH1;TYRO3	SST
588	GO_Biological_Process_2023__Enzyme-Linked Receptor Protein Signaling Pathway (GO:0007167)	0.222612	1.85987	0	0.0877145	1	38/100	21.19%	ROS1;EGFR;ROR1;ERBB4;MERTK;MET;PTPRT;SYK;EFS;LYN;AXL;PDGFRB;BDNF;FGFR4;GFRA2;CD8B;ROR2;FGFR3;PDGFRA;CD4;NGF;CASS4;ERBB2;FLT1;YES1;GUCY2C;FGFR1;JAK3;TEK;NTRK3;PTPRU;TYRO3;GP6;DDR2;DOK6;PTPRF;NPR2;FLT3	SST
589	GO_Biological_Process_2023__DNA Catabolic Process (GO:0006308)	-0.476198	-1.85656	0.00671141	0.0975684	1	8/16	15.63%	FOXL2;DNASE2B;ISG20;ENDOG;CECR2;DNASE1L2;DNASE2;MUS81	SST
590	GO_Biological_Process_2023__Phospholipase C-activating G Protein-Coupled Receptor Signaling Pathway (GO:0007200)	-0.294655	-1.8548	0.00742942	0.0980929	1	27/58	19.44%	P2RY1;DRD3;P2RY6;CX3CR1;GPR17;PTGER3;ADRA2A;GNA15;GPR18;TRHR;C3AR1;OPRM1;F2RL1;DRD1;FPR3;ADRA1B;HTR2A;HTR2B;P2RY12;GNA14;LTB4R;CCKBR;VIP;NMBR;ADRA1D;LPAR1;OPRL1	SST
591	GO_Biological_Process_2023__Mitochondrial Transport (GO:0006839)	-0.306376	-1.85468	0.00762195	0.0974463	1	32/52	40.47%	TIMM17B;BCS1L;TIMM13;MGARP;SLC25A5;TOMM22;TIMM10;TIMM8B;AIP;PPIF;BAD;BAK1;TSPO;FIS1;TOMM34;TOMM7;SLC25A20;TOMM40;SLC25A4;BCAP31;TIMM44;TOMM5;DNAJC19;SLC25A13;HSP90AA1;TOMM20;OXA1L;TIMM17A;BNIP3;SLC25A24;STARD3;PINK1	SST
592	WikiPathway_2023_Human__Peptide GPCRs WP24	-0.355663	-1.8511	0.00158228	0.0994318	1	19/35	19.44%	MC4R;NPY2R;CX3CR1;AVPR1A;NPY5R;TRHR;NPY1R;C3AR1;GNRHR;MC1R;OPRM1;TSHR;FPR3;CCR10;SSTR1;CCKBR;HCRTR1;NMBR;OPRL1	SST
593	GO_Biological_Process_2023__Vesicle Budding From Membrane (GO:0006900)	-0.360879	-1.85103	0.00818331	0.098746	1	28/30	58.71%	S100A10;RILP;TRAPPC1;CHMP4A;TRAPPC4;AP2M1;TRAPPC2L;TRAPPC5;TRAPPC2B;VPS4A;CHMP6;FNBP1L;CHMP5;TRAPPC3;SEC13;CHMP7;SNX3;TRAPPC2;TRAPPC9;TMED10;TRAPPC13;VAPB;TRAPPC10;WASL;TRAPPC6B;PICALM;VAPA;GOLPH3	SST
594	GO_Molecular_Function_2023__Ion Channel Inhibitor Activity (GO:0008200)	-0.350983	-1.85076	0.00983607	0.0982695	1	18/31	35.11%	TNNI3;PHPT1;PACSIN3;CAV3;KCNV1;KCNMB2;VAMP8;FKBP1B;CFTR;ITPR1;SLC30A1;CALM2;SCN1B;STX1A;RACK1;FKBP1A;CALM1;NEDD4	SST
595	GO_Biological_Process_2023__Myeloid Leukocyte Differentiation (GO:0002573)	-0.303029	-1.85071	0.00642055	0.0975638	1	22/51	21.59%	IL31RA;PRTN3;CEBPA;IGSF23;TYROBP;LGALS9;TGFBR2;IL33;KIT;CSF1;SLC4A2;HLA-DRB1;GPR183;TNFRSF11A;F2RL1;MMP9;BMP2;CSF1R;CASP8;VEGFA;EFNA2;OSCAR	SST
596	GO_Biological_Process_2023__Cell-Cell Junction Organization (GO:0045216)	0.264027	1.85062	0	0.0915888	1	32/60	28.04%	KIRREL1;CLDN5;CDH12;DSP;PKHD1;CDH6;TRPV4;TJP3;CDH22;SMAD3;GJC1;PKP2;MARVELD2;TGFB2;TGFB3;TJP2;DCHS1;CDH11;CDHR3;CDH7;TGFB1;CDH18;CDH3;CDH26;NLGN2;CDH4;CDH8;CDH10;CTNND1;TLN1;CDH2;LIMS1	SST
597	GO_Biological_Process_2023__Sterol Homeostasis (GO:0055092)	-0.299448	-1.84929	0.00313972	0.0978123	1	32/58	30.58%	LCAT;ANGPTL3;IL18;GPIHBP1;CAV1;ABCG8;LCP1;LIPC;MTTP;CAV3;SOAT2;LAMTOR1;LRP5;ABCD1;ACSM3;APOE;CD24;ABCG5;XBP1;DGAT2;EHD1;LDLR;EPHX2;TMEM97;AKR1C1;NR1D1;INSIG1;HDAC9;ABCG4;NPC2;FABP3;NR1H2	SST
598	GO_Biological_Process_2023__Negative Regulation Of Blood Vessel Morphogenesis (GO:2000181)	0.263754	1.84818	0.0084507	0.0922631	1	22/56	19.59%	STAB1;CLDN5;FOXO4;GHRL;NRG1;CD160;COL4A2;RGCC;SEMA3E;THBS1;SERPINF1;AMOT;NIBAN2;TGFB2;ATP2B4;CNMD;HSPG2;TEK;ADGRB1;THBS4;PPARG;PTPRM	SST
599	GO_Biological_Process_2023__Regulation Of Peptidyl-Tyrosine Phosphorylation (GO:0050730)	0.250242	1.84574	0.00877193	0.0928548	1	27/70	18.60%	HGF;EGFR;CD44;ANGPT1;ITGB2;BMP6;IL6R;AGT;PECAM1;VTN;HCLS1;NRG1;FGF10;IL23A;IL15;AMH;BST1;CD74;GHR;PDGFB;PTK2B;RAP2B;ITGA5;TGFB1;PDGFA;THBS4;ACVR1	SST
600	GO_Biological_Process_2023__Negative Regulation Of Blood Coagulation (GO:0030195)	0.408668	1.84353	0.00921659	0.0928237	1	9/17	12.00%	EDN1;PLAT;SERPINF2;TFPI;VTN;PDGFRA;SERPINE2;PDGFB;F12	SST
601	GO_Biological_Process_2023__Osteoclast Differentiation (GO:0030316)	-0.416381	-1.84314	0.00664452	0.101681	1	10/20	21.59%	IGSF23;TYROBP;CSF1;SLC4A2;GPR183;TNFRSF11A;BMP2;CSF1R;EFNA2;OSCAR	SST
602	WikiPathway_2023_Human__Immune Infiltration In Pancreatic Cancer WP5285	-0.445332	-1.83946	0.00337268	0.103508	1	10/17	17.81%	IL5;VEGFC;LGALS9;CCL5;CCL28;MMP9;LGALS1;VEGFB;LGALS3;VEGFA	SST
603	MSigDB_Hallmark_2020__IL-6/JAK/STAT3 Signaling	0.26159	1.83938	0.00280899	0.0945989	1	19/56	14.40%	ITGA4;CD44;TLR2;PIK3R5;CD38;IL15RA;IL4R;CXCL13;LTBR;PIM1;MAP3K8;IL17RB;FAS;TNFRSF1A;TNFRSF1B;IRF9;CNTFR;IL10RB;JUN	SST
604	GO_Biological_Process_2023__Regulation Of Interleukin-6 Production (GO:0032675)	0.233991	1.83828	0	0.0946436	1	22/79	10.34%	AIF1;POU2AF1;TNFAIP3;TLR6;TLR4;IFIH1;TLR2;AGER;CLEC7A;IL6R;SYK;GHRL;LILRA2;IRAK3;NCKAP1L;TLR1;TMEM106A;ELF4;HLA-B;NLRP12;RIGI;CD74	SST
605	WikiPathway_2023_Human__Hippo Signaling Regulation Pathways WP4540	0.235131	1.83605	0	0.0953266	1	42/89	27.69%	EGFR;MET;TEAD4;CDH12;CDH19;LEF1;PDGFRB;YAP1;CDH6;FGFR4;PRKCQ;FGFR3;PDGFRA;CDH22;PLCB3;SMAD3;FLT1;FGFR1;CDH11;TEK;PRKCH;CDH7;GNAL;PLCB4;PRKCA;CDH18;PRKCG;WWTR1;STK3;PRKCB;CDH3;FLT3;GNA11;CDH4;CDH8;TEAD1;CDH10;PRKAG2;NF2;PRKCE;INSR;CDH2	SST
606	GO_Biological_Process_2023__Antimicrobial Humoral Response (GO:0019730)	-0.365462	-1.8356	0.00934579	0.104305	1	17/30	21.53%	PRTN3;H2BC11;ROMO1;RARRES2;WFDC3;AZU1;H2BC21;PRSS3;FAU;GAPDH;FAM3A;CXCL14;WFDC2;HLA-A;PLA2G6;PGLYRP1;COLEC11	SST
607	GO_Biological_Process_2023__Visual Perception (GO:0007601)	-0.277919	-1.83206	0.003003	0.106398	1	23/71	12.46%	CRYGD;ZIC2;MYO7A;TH;CABP4;RGS16;EFEMP1;EYS;GUCY2F;CRYBG3;TRPM1;SFRP5;ROM1;GRM8;GPR143;POU6F2;PRPH2;DHRS3;RDH12;E2F1;RABGGTA;COL18A1;CRYBB2	SST
608	WikiPathway_2023_Human__Amplification And Expansion Of Oncogenic Pathways As Metastatic Traits WP3678	0.424702	1.8317	0.00688073	0.0960234	1	6/15	3.79%	POSTN;TNC;PIK3CG;CXCR4;WNT2;LEF1	SST
609	MSigDB_Hallmark_2020__Fatty Acid Metabolism	-0.231856	-1.831	0.0042796	0.106562	1	72/137	36.57%	GPD1;S100A10;ACSS1;LTC4S;HSD17B10;G0S2;ACADL;AQP7;ACADS;CA4;SDHD;LGALS1;GCDH;MIF;PPARA;ACSM3;ODC1;NTHL1;IDH3B;ECH1;PSME1;ACAA2;ALDOA;IDH3G;CA2;CBR3;H2AZ1;SUCLG2;PCBD1;ERP29;LDHA;UROD;NCAPH2;CRAT;YWHAH;HSD17B7;CD36;CPT2;ECI1;PDHB;APEX1;ENO2;GRHPR;MDH2;CRYZ;NSDHL;OSTC;GSTZ1;CBR1;RETSAT;ACOT2;MAOA;HCCS;TP53INP2;DHCR24;PRDX6;IDI1;HSP90AA1;D2HGDH;ACAA1;ECHS1;HMGCL;PDHA1;FASN;GABARAPL1;ACAT2;ACADVL;HSP…	SST
610	WikiPathway_2023_Human__T Cell Modulation In Pancreatic Cancer WP5078	-0.353797	-1.83033	0.00487805	0.106352	1	17/32	21.13%	VEGFC;LGALS9;CD40;IDO1;CD80;PDCD1LG2;TNFRSF9;CD274;TNFSF9;LGALS1;VEGFB;LGALS3;VEGFA;HLA-A;B2M;ARG1;NT5E	SST
611	GO_Molecular_Function_2023__Oxidoreductase Activity, Acting On The CH-OH Group Of Donors, NAD Or NADP As Acceptor (GO:0016616)	-0.276149	-1.82973	0.00592593	0.106026	1	36/74	29.68%	HSD17B8;SDR9C7;DHRS4L2;PHGDH;LDHC;SDR16C5;SPR;HSD17B10;AKR1D1;LDHD;IMPDH2;SDR42E2;DHRS3;RDH12;BDH2;DHDH;GFUS;DCXR;CBR3;LDHB;LDHA;HSD17B7;PRXL2B;MDH1B;DHRS11;GRHPR;AKR1C3;AKR1C1;MDH2;NSDHL;LDHAL6A;DHRS1;CBR1;DHRS4;KCNAB1;AKR1A1	SST
612	GO_Biological_Process_2023__Protein Stabilization (GO:0050821)	-0.216132	-1.82859	0.00141443	0.106219	1	124/185	52.63%	CHEK2;TYROBP;TMEM88;GPIHBP1;EFNA1;PIM2;SWSAP1;TNIP2;GLMP;SOX4;STUB1;RASSF2;PRKCD;GAPDH;PFN1;PHB1;GRN;PDCL3;HIP1;PIH1D2;PHB2;WFS1;MCM8;BAG1;TRIM39;PPIB;RPL11;COA8;PFDN6;HIP1R;TBL1X;RPS7;USP27X;CCT7;PIH1D1;MSX1;CALR;SAXO1;WDR81;CCT5;MUL1;BAG6;PDRG1;UXT;WNT10B;USP19;MT3;TELO2;PARK7;NOP53;HSP90AB1;HCFC1;PFDN2;PFDN5;WIZ;RPL5;RPL17;PEX19;CRYAB;HSP90AA1;PFN2;HSPA1A;SYVN1;DVL1;VBP1;IGF1;FLOT1;POLR2E;TAF9…	SST
613	KEGG_2021_Human__Malaria	0.313253	1.82823	0.00520833	0.0976028	1	15/35	12.65%	HGF;TLR4;TLR2;ITGB2;MET;GYPC;PECAM1;ICAM1;THBS1;CR1L;ACKR1;TGFB2;TGFB3;SDC1;ITGAL	SST
614	MSigDB_Hallmark_2020__KRAS Signaling Dn	-0.23135	-1.82388	0.00294551	0.109075	1	44/129	18.15%	WNT16;TNNI3;PTGFR;PNMT;IRS4;HTR1B;SMPX;IL5;TFCP2L1;TCF7L1;P2RX6;CD80;GPR3;BARD1;CHRNG;DCC;COPZ2;KCND1;KLK7;HTR1D;KCNMB1;FGF22;SLC30A3;CHST2;NR4A2;IGFBP2;CCDC106;ARHGDIG;EPHA5;SLC12A3;CCNA1;GPRC5C;RIBC2;MAGIX;NGB;SGK1;DLK2;KLHDC8A;KCNE2;PRODH;CLDN16;BTG2;GAMT;SELENOP	SST
615	GO_Biological_Process_2023__Liver Development (GO:0001889)	-0.375115	-1.82342	0.0066335	0.108691	1	14/26	23.26%	CEBPA;WNT4;NKX2-8;E2F7;GFER;PROX1;AURKA;DNAAF1;XBP1;CDK5RAP3;CCDC39;CITED2;PCK2;LSR	SST
616	GO_Biological_Process_2023__Regulation Of Release Of Cytochrome C From Mitochondria (GO:0090199)	-0.351575	-1.8178	0.00158983	0.111334	1	25/35	40.91%	TNFSF10;TRIAP1;TP53;GPER1;MMP9;BAX;HRK;PRELID1;PPIF;BAD;BAK1;PLAUR;BCL2L11;MOAP1;NOL3;PSMD10;FXN;IGF1;MLLT11;BNIP3;PDCD5;BID;CLU;PINK1;GHITM	SST
617	GO_Biological_Process_2023__Calcium Ion Transmembrane Import Into Cytosol (GO:0097553)	0.250187	1.81775	0.00615385	0.102736	1	30/70	23.34%	HTR2C;TRPV5;SCN7A;ITPR2;NALF2;TRPV4;PLCE1;DRD2;SLC24A4;PLCB3;CACNA1I;CACNA1H;ATP2B4;PLCH2;TRPV1;JPH2;SCN11A;RYR1;PLCB4;FLNA;SLC8A2;CHERP;GRIN2D;JPH1;CACNA1G;GRIN2A;CACNA1E;RYR2;CACNA1A;PLCG1	SST
618	KEGG_2021_Human__Leukocyte transendothelial migration	0.222048	1.81536	0.00343643	0.103057	1	30/95	16.36%	CLDN14;TXK;CXCL12;ITGA4;CLDN5;CXCR4;ITGB2;MYL7;RHOH;RAC2;PECAM1;ICAM1;CYBB;CLDN2;CLDN11;EZR;CLDN15;MYL5;NCF2;CLDN10;F11R;ITGAL;ACTN1;VASP;PIK3R2;PTK2B;RAPGEF3;MSN;PRKCA;CLDN4	SST
619	GO_Cellular_Component_2023__Supramolecular Fiber (GO:0099512)	0.3453	1.81429	0.00985222	0.103091	1	13/25	21.44%	FBN2;FBLN5;MYH9;ELN;THSD4;MYH11;MYH13;MYO18B;MYH15;MYH7B;LTBP4;CTPS1;ADAMTS10	SST
620	GO_Cellular_Component_2023__Adherens Junction (GO:0005912)	0.206858	1.81159	0	0.10428	1	59/138	26.33%	SHROOM4;PDLIM4;ANXA1;CDH12;PGM5;DSP;SH3BP1;PDLIM1;CDH6;TRPV4;CDC42EP1;ANXA2;LLGL2;CDH22;EZR;PDLIM5;JUP;PKP2;FERMT2;NIBAN2;LDB3;DCHS1;LIMD1;CDH11;MYO1E;CDHR3;MSN;RND1;PLPP3;CNN3;CDH7;AJAP1;LLGL1;WTIP;NECTIN1;CHAF1B;CDH18;MPP3;BAIAP2;CCDC85C;TNKS1BP1;PTPRM;SMAD7;DLG4;CDH3;NECTIN2;PARD3;CDH26;CDH4;CRB1;CDH8;PVR;FLOT2;CDH10;CTNND1;LRRC7;TLN1;NF2;SPTBN4	SST
621	GO_Biological_Process_2023__Lysosome Localization (GO:0032418)	-0.328729	-1.81003	0.00923077	0.115295	1	24/38	38.03%	BLOC1S1;KIT;TFEB;RAB34;LAMTOR1;NR4A3;BORCS6;MILR1;HPS6;VPS33B;S100A13;SNAPIN;BORCS8;RAB3A;PIP4P1;RNF167;VPS33A;BLOC1S2;KXD1;PIK3CD;BORCS7;DEF8;KLC2;CHGA	SST
622	GO_Biological_Process_2023__Defense Response To Symbiont (GO:0140546)	0.212728	1.80997	0	0.104631	1	30/107	13.99%	IFITM2;STING1;IGF2BP1;IFIH1;TLR2;OPRK1;APOBEC3F;NLRC5;DDX60;BST2;MLKL;APOBEC3H;GBP2;IFI44L;OAS2;OAS3;PLA2G10;IFI16;MX2;CGAS;OAS1;IFITM3;RIGI;DDX60L;TRIM56;TTC4;IFIT3;MX1;MOV10;SLFN11	SST
623	GO_Cellular_Component_2023__Mitochondrial Intermembrane Space (GO:0005758)	-0.294416	-1.80981	0.00302572	0.114707	1	43/56	52.60%	BLOC1S1;TRIAP1;TIMM13;HAX1;TIMM10;CHCHD2;NDUFB7;TIMM8B;STOML2;PRELID1;HTRA2;ARL2;NME4;TIMM8A;CHCHD10;CHCHD4;SOD1;CHCHD5;CYCS;COA4;UQCC2;NDUFA8;COX17;ARL2BP;COA7;GATM;REXO2;PRELID3B;COA6;TIMM10B;CPOX;PINK1;AIFM1;COX19;THOP1;SDHAF3;STMP1;NLN;CLPB;AK2;TIMM9;SIRT5;FBXL4	SST
624	GO_Biological_Process_2023__Ubiquitin-Dependent ERAD Pathway (GO:0030433)	-0.274013	-1.8088	0.00914634	0.114756	1	52/71	52.57%	RNF5;DERL3;STUB1;TMUB1;UBXN10;WFS1;TMEM129;SEC61B;SELENOS;CALR;DNAJB9;UBXN8;FBXO2;FBXO6;BAG6;TMUB2;HSPA5;USP19;RHBDD2;YOD1;ERLIN2;MAN1B1;DNAJB2;SYVN1;FOXRED2;ANKZF1;JKAMP;OS9;UBQLN2;TRIM25;AUP1;SGTA;UBE2J2;HERPUD1;FBXO44;HSP90B1;ERLEC1;UFD1;RNF103;UBE2J1;DERL1;VCP;DERL2;UBE2G2;DNAJC10;ERLIN1;CANX;FAM8A1;PSMC6;RNF121;TRIM13;STT3B	SST
625	GO_Biological_Process_2023__RNA Splicing, Via Transesterification Reactions With Bulged Adenosine As Nucleophile (GO:0000377)	-0.213617	-1.80746	0.00140449	0.115247	1	170/173	76.67%	RNF113A;GEMIN7;LSM7;SF3B5;U2AF1L4;SNU13;DDX41;SNRPD2;HSPA8;SF3B6;LSM2;LSM4;RBM42;CACTIN;ZMAT2;TFIP11;HNRNPA1;RBMX2;GPKOW;SRSF8;SNRPE;GEMIN6;SNRPB;XAB2;DDX39A;BUD31;ESS2;DHX16;SNRPB2;SYF2;SRSF2;SF3A2;DBR1;SF3B4;EIF4A3;WDR83;RBM4B;SRSF7;DHX38;PIN1;LSM3;RBM8A;SNRPD3;BUD13;HTATSF1;RBM22;SF3B2;PRPF31;SNRPG;BCAS2;FRG1;IK;LSM5;CWC25;SF3A1;CWC15;SRSF9;DDX23;RBM19;PPIL1;MAGOHB;SRSF3;PRPF4;MFAP1;SYNCRIP;U2…	SST
626	WikiPathway_2023_Human__17P13 3 YWHAE Copy Number Variation WP5376	-0.42391	-1.80677	0.00830565	0.11516	1	19/20	55.69%	TH;DDC;DISC1;DCTN3;CDK5;YWHAH;DCTN6;PPP2CA;YWHAB;DCTN1;DCTN2;YWHAG;YWHAQ;YWHAZ;YWHAE;DCTN5;NDEL1;DYNC1H1;DCTN4	SST
627	GO_Biological_Process_2023__Monocarboxylic Acid Transport (GO:0015718)	-0.288112	-1.80657	0.00311042	0.114636	1	31/61	27.85%	SLC5A12;SLC5A8;SLC6A12;CRABP1;SLC10A4;SLCO1C1;SLC16A5;FABP7;SLC10A1;SLC26A6;FABP6;SLC10A6;ABCC11;SLC51A;SLCO1A2;MFSD2A;SLC27A3;SLC16A6;SLC22A13;CEACAM1;SLC10A5;FABP5;CRABP2;ATP8B1;SLC6A8;ABCG2;SLC5A6;SLC16A13;AKR1C1;SLC16A4;SLC16A3	SST
628	KEGG_2021_Human__Arginine and proline metabolism	-0.318159	-1.80366	0.00643087	0.116375	1	35/45	48.24%	PYCR1;CARNS1;ALDH1B1;ALDH4A1;ODC1;DAO;PRODH;GAMT;PYCR2;PYCR3;ARG1;CKB;AGMAT;NOS2;P4HA3;SAT2;SRM;MAOA;ALDH7A1;CKMT2;GOT1;SAT1;GATM;ALDH2;CKMT1A;CKMT1B;ALDH9A1;CNDP2;LAP3;OAT;ARG2;AZIN2;GOT2;AMD1;ALDH18A1	SST
629	GO_Cellular_Component_2023__Precatalytic Spliceosome (GO:0071011)	-0.301845	-1.802	0.00762195	0.11626	1	41/51	54.43%	RNF113A;LSM7;SF3B5;SNU13;SNRPD2;SF3B6;LSM2;LSM4;ZMAT2;RBMX2;SNRPE;SNRPB;DHX16;SNRPB2;SF3A2;SF3B4;LSM3;SNRPD3;SF3B2;PRPF31;SNRPG;IK;LSM5;SF3A1;MAGOHB;PRPF4;MFAP1;SNRNP200;SNIP1;PRPF6;SNRPA1;SNRPD1;PRPF38A;LSM8;TXNL4A;SF3A3;WBP4;LSM6;PRPF38B;CWC22;SMU1	SST
630	GO_Biological_Process_2023__mRNA Processing (GO:0006397)	-0.20519	-1.80151	0.00138122	0.115945	1	200/205	76.67%	RNF113A;RAMAC;ALYREF;GEMIN7;LSM7;SF3B5;U2AF1L4;MBLAC1;TBRG4;SNU13;DDX41;SNRPD2;HSPA8;SF3B6;LSM2;LSM4;RBM42;CACTIN;ZMAT2;TFIP11;HNRNPA1;NUDT21;RBMX2;GPKOW;SRSF8;SNRPE;GEMIN6;SNRPB;XAB2;DDX39A;BUD31;ESS2;DHX16;SNRPB2;SYF2;SRSF2;SF3A2;DBR1;SF3B4;EIF4A3;WDR83;RBM4B;SRSF7;HEXIM1;DHX38;PIN1;LSM3;RBM8A;SNRPD3;BUD13;HTATSF1;RBM22;SF3B2;PRPF31;CMTR2;SNRPG;BCAS2;FRG1;IK;LSM5;CWC25;SF3A1;CWC15;SRSF9;DDX23;R…	SST
631	GO_Biological_Process_2023__Cholesterol Homeostasis (GO:0042632)	-0.291682	-1.79676	0.00468019	0.11778	1	31/57	30.58%	LCAT;ANGPTL3;IL18;GPIHBP1;CAV1;ABCG8;LCP1;LIPC;MTTP;CAV3;SOAT2;LAMTOR1;LRP5;ACSM3;APOE;CD24;ABCG5;XBP1;DGAT2;EHD1;LDLR;EPHX2;TMEM97;AKR1C1;NR1D1;INSIG1;HDAC9;ABCG4;NPC2;FABP3;NR1H2	SST
632	GO_Biological_Process_2023__Positive Regulation Of Angiogenesis (GO:0045766)	-0.251066	-1.79128	0.00733138	0.12114	1	34/94	18.09%	PSG1;KDR;PIK3R6;SPHK1;VEGFC;AQP1;TWIST1;ANGPTL3;RRAS;ITGAX;FUT1;CD40;NODAL;RAMP2;ANGPTL4;S100A1;HMGA2;SERPINE1;CDH5;SEMA5A;ECM1;FGF1;SASH1;MDK;ETS1;JMJD8;VEGFB;WNT5A;GRN;PDCL3;SFRP2;FGF2;VEGFA;XBP1	SST
633	GO_Biological_Process_2023__Circulatory System Development (GO:0072359)	0.213217	1.78993	0	0.110524	1	35/102	19.06%	PDLIM4;ERBB4;PDLIM1;GJA1;HEY2;PLCE1;SOX9;AKAP13;ZFPM2;CDKN1A;ID2;POPDC3;PDLIM5;POPDC2;TGFBR1;PKP2;NXN;SLC2A12;GLI2;TGFB2;PDGFB;EEF1AKMT4-ECE2;LDB3;PCSK5;HSPG2;HEG1;TEK;NTRK3;DNAAF4;NOTCH4;KDM6B;TGFB1;STK11;SRF;BCOR	SST
634	WikiPathway_2023_Human__Mesodermal Commitment Pathway WP2857	0.20325	1.78306	0.00327869	0.111866	1	50/119	28.39%	FZD8;SMAD6;INHBA;FOXH1;PAX6;TOX;LEF1;YAP1;ZFHX4;BMP7;CSRP2;BHLHE40;SMAD3;POU5F1;AMH;PBX3;HNF4A;NANOG;SLC2A12;HES7;FGFR1;CTBP2;WNT3;BCORL1;RARG;RARB;TRIM71;AXIN2;ARL4A;WDHD1;TRERF1;FZD4;DNMT3B;ACVR1;SRF;AHDC1;SCHIP1;EXT1;CRTC1;NCAPG2;ATP8B2;TEAD1;JAK2;ELK4;AXIN1;CEP250;SMAD1;PARP8;NFE2L2;ACVR2B	SST
635	GO_Biological_Process_2023__Positive Regulation Of Cytokine Production (GO:0001819)	-0.203319	-1.7803	0	0.127774	1	73/225	18.96%	SULF1;GARIN5A;SPHK1;HPSE;ZBTB7B;TYROBP;HHLA2;TWIST1;FCER1G;SIGLEC16;LGALS9;IL18;AGPAT2;TLR5;CD40;IL33;GBP5;NODAL;CD80;PTPRC;ADRA2A;PTGER4;CYBA;ITK;CRTAM;HYAL2;DDIT3;C3;LCP1;TRAF3IP3;IRF5;IKBKE;CD274;CD6;SERPINE1;BTN3A2;IL12RB1;C1QTNF4;NR1H4;CD14;MYD88;F2RL1;MDK;LTB;STOML2;GAPDH;NLRP3;IL1R1;FADD;HILPDA;PHB1;WNT5A;HTR2B;C1QTNF3;EBI3;LAMTOR5;PNP;HLA-DPA1;FZD5;IRF3;CSF1R;AFAP1L2;S100A13;LAPTM5;ATF4;H…	SST
636	WikiPathway_2023_Human__Pluripotent Stem Cell Differentiation Pathway WP2848	-0.343885	-1.77909	0.00978793	0.128101	1	17/32	21.13%	DKK1;LEFTY1;IL11;GDF5;SHH;NODAL;NOTCH1;KIT;CSF1;FGF1;FGF8;WNT5A;CSF1R;FGF2;VEGFA;ALK;NT5E	SST
637	GO_Biological_Process_2023__Bone Development (GO:0060348)	-0.353883	-1.77782	0.00645161	0.128354	1	15/32	18.05%	SULF1;CYP26B1;PTPRC;SFRP4;PTGER4;TP53;OGN;NOTUM;FGF8;ATG9B;LRP5;VKORC1;FGFR2;PPIB;RPL13	SST
638	GO_Molecular_Function_2023__Serine-Type Peptidase Activity (GO:0008236)	-0.261012	-1.7661	0.00737463	0.13603	1	28/74	17.35%	CELA2A;PRTN3;PRSS53;RHBDF1;PRSS48;MASP1;KLK10;PROC;GZMM;OVCH2;PRSS12;PLG;KLK7;HPN;DPP4;PARL;ADAM8;MMP9;F10;CELA2B;PRSS36;PRSS3;TLL2;HTRA2;PCSK1;MMP11;APEH;MASP2	SST
639	WikiPathway_2023_Human__Complement System In Neuronal Development And Plasticity WP5090	0.224396	1.76452	0.00872093	0.122932	1	30/84	18.65%	CASP7;CR2;MERTK;ITGB2;C1QA;ATP10A;C1QC;PLSCR4;CASP10;C1QB;MFGE8;AXL;VTN;LLGL2;C1R;ITGAV;C5AR1;FAS;TGFB2;TGFB3;C5AR2;PROS1;TGFB1;DIABLO;TYRO3;C2;DEDD;PLSCR1;C4BPA;SERPING1	SST
640	GO_Molecular_Function_2023__Growth Factor Activity (GO:0008083)	-0.301346	-1.76334	0.00761035	0.137965	1	25/48	24.83%	NRTN;DKK1;VEGFC;ANGPTL3;IL11;FGF20;CSF1;CLEC11A;FGF22;PSPN;FGF1;ARTN;FGF8;JAG1;MDK;VEGFB;GRN;FGF2;VEGFA;HBEGF;FGF7;IL7;PTN;OSGIN1;EGF	SST
641	GO_Biological_Process_2023__Positive Regulation Of Vasculature Development (GO:1904018)	-0.257769	-1.76151	0.00446429	0.138252	1	30/81	18.09%	PSG1;KDR;PIK3R6;SPHK1;VEGFC;AQP1;TWIST1;ANGPTL3;RRAS;ITGAX;CD40;NODAL;RAMP2;ANGPTL4;HMGA2;SERPINE1;CDH5;SEMA5A;ECM1;FGF1;SASH1;ETS1;VEGFB;WNT5A;GRN;PDCL3;SFRP2;FGF2;VEGFA;XBP1	SST
642	GO_Biological_Process_2023__Transmembrane Receptor Protein Tyrosine Kinase Signaling Pathway (GO:0007169)	0.172317	1.75948	0	0.125616	1	62/241	15.28%	PRLR;HGF;ROS1;EGFR;ROR1;ANGPT1;CHRNA3;ERBB4;FGF5;MERTK;PDK4;MET;PTPRT;PDGFD;SYK;EFS;FOXO4;PLAT;LYN;GDF15;AXL;PDGFRB;EFNB1;ARHGEF28;BDNF;FGFR4;GFRA2;CD8B;ROR2;NRG1;FGFR3;PDGFRA;KL;COL4A2;EPHA3;FLRT2;SHCBP1;CD4;FGF18;NGF;EPHA4;CASS4;ERBB2;FLT1;YES1;SOCS2;SULF2;GHR;PDGFB;GALNT3;EPHA6;FGFR1;PIK3R2;PTK2B;TEK;PRKD1;NGEF;NTRK3;EPHB1;PRKD2;FGF17;BCAR3	SST
643	WikiPathway_2023_Human__Spinal Cord Injury WP2431	0.221709	1.7574	0.00315457	0.126464	1	23/87	10.45%	AIF1;ACAN;ROS1;EGFR;TACR1;TLR4;NOX4;PTGS2;ANXA1;GFAP;C1QB;AQP4;GJA1;ICAM1;BDNF;COL4A1;SLIT1;SOX9;VIM;SLIT3;EPHA4;NTN1;NOS1	SST
644	KEGG_2021_Human__Regulation of actin cytoskeleton	0.177251	1.75106	0	0.128392	1	55/191	18.73%	ITGA8;CXCL12;EGFR;ITGA4;LPAR5;CXCR4;FGF5;ITGB2;MYL7;PDGFD;RAC2;PDGFRB;ITGB4;ITGA1;FGFR4;MYH9;SCIN;NCKAP1L;FGFR3;ITGAV;PDGFRA;IQGAP2;FGF10;ITGA2;ITGA11;EZR;FGF18;TMSB4Y;MYH11;CHRM5;MYL5;CHRM2;ITGB8;PDGFB;ITGAL;FGFR1;ACTN1;PIK3R2;ITGB5;ITGA10;MYH14;ITGA9;MSN;MYLK4;MYLK3;FGF17;ITGA5;ITGA6;PDGFA;ARHGEF6;MYLK;ARHGEF1;PAK6;BAIAP2;PXN	SST
645	MSigDB_Hallmark_2020__Hypoxia	0.182989	1.74734	0.00383142	0.130752	1	66/178	23.45%	CCN1;CHST3;HK2;GPC4;SDC4;EGFR;TNFAIP3;TGM2;COL5A1;CXCR4;LOX;B4GALNT2;CAVIN1;TGFBI;FOSL2;GPC3;ACKR3;ANXA2;CSRP2;TES;MYH9;SLC2A5;CA12;IGFBP3;KDELR3;GCNT2;MT2A;BHLHE40;AMPD3;CDKN1A;F3;ATF3;PIM1;CCN5;MT1E;TMEM45A;MAFF;PLIN2;PDGFB;TGFB3;CP;PLAC8;SRPX;JUN;SLC2A1;AK4;NFIL3;PPARGC1A;PHKG1;PRKCA;PPP1R15A;CASP6;VLDLR;PGM2;ATP7A;NCAN;PDK1;BCL2;JMJD6;GPI;PFKFB3;GYS1;LARGE1;AKAP12;PPFIA4;EXT1	SST
646	MSigDB_Hallmark_2020__Interferon Gamma Response	0.180979	1.73943	0.00359712	0.13235	1	43/167	12.75%	IFITM2;CASP7;CD86;TNFAIP3;APOL6;IFIH1;PTGS2;NLRC5;DDX60;NMI;BST2;CD38;PARP14;PSMB9;IL15RA;FPR1;IL4R;IFI44L;CMKLR1;ICAM1;OAS2;OAS3;XAF1;EPSTI1;IFI35;TXNIP;C1R;MT2A;MX2;CDKN1A;IL15;PIM1;FAS;IFITM3;HLA-B;CD74;PARP12;MARCHF1;IRF9;IFIT3;MX1;DHX58;P2RY14	SST
647	GO_Biological_Process_2023__Sensory Perception Of Sound (GO:0007605)	-0.257686	-1.73927	0.00793651	0.151495	1	38/71	32.97%	MYO7A;USH1C;POU3F4;SNAI2;WHRN;GRXCR1;KIT;TMC1;TIMM13;HPN;EYA1;KCNQ1;TMIE;LRP2;TIMM10;GRXCR2;TIMM8B;CDH23;WFS1;EPS8L2;KCNE1;CRYM;PCDH15;TBL1X;SOD1;COL4A3;ZNF354A;CHRNB2;LHFPL5;SLC26A4;CLIC5;TPRN;ALDH7A1;NDUFB9;DCDC2;PDZD7;SPNS2;WDR1	SST
648	GO_Biological_Process_2023__Positive Regulation Of Cell Motility (GO:2000147)	0.181657	1.73073	0	0.136423	1	57/179	18.60%	TRIP6;AIF1;HGF;CXCL12;EGFR;SEMA3D;CXCR4;SEMA3F;EDN1;PDGFD;CLEC7A;SEMA5B;CAVIN1;VSIR;LEF1;PDGFRB;PECAM1;PDPN;ROR2;PDGFRA;FAM83H;ZNF703;GCNT2;SEMA6D;SEMA3E;THBS1;FAM107A;LAMC2;TRADD;TGFBR1;EPHA4;CASS4;NTN1;FLT1;FERMT2;VIL1;PDGFB;ARHGEF39;CCNA2;PTK2B;TCAF2;NTRK3;CTSH;SUN2;PRKCA;CLDN4;TGFB1;PODXL;ITGA6;SEMA4A;PDGFA;CARMIL1;MYLK;CEMIP;MYO1C;FZD4;ACVR1	SST
649	GO_Molecular_Function_2023__Olfactory Receptor Activity (GO:0004984)	-0.349614	-1.72994	0.00961538	0.15781	1	15/29	19.53%	OR51D1;OR2J2;OR2AK2;OR14J1;OR13A1;OR5V1;OR7A17;OR2AG1;OR3A3;OR51M1;OR2M4;OR7C1;OR10A2;OR9Q1;OR2AG2	SST
650	GO_Biological_Process_2023__Response To Zinc Ion (GO:0010043)	0.371943	1.72849	0.00973236	0.136892	1	8/19	9.63%	MT1G;MT1X;MT1M;SLC30A8;GLRA2;MT2A;MT1E;GLRA1	SST
651	GO_Biological_Process_2023__Positive Regulation Of Response To External Stimulus (GO:0032103)	-0.231084	-1.72846	0.00753012	0.15865	1	35/107	15.51%	CASP4;CEBPA;TASL;SH2D1B;SIGLEC16;IL18;IL33;GBP5;PTGER4;CYBA;PLG;CCL5;HYAL2;RARRES2;LCP1;NLRC4;SERPINE1;SASH1;LY86;F2RL1;ADAM8;APOH;MMRN2;DDT;MDK;ETS1;LGALS1;NLRP3;FADD;WNT5A;RNF31;GRN;USF1;P2RY12;NLRP1	SST
652	GO_Cellular_Component_2023__Endoplasmic Reticulum Lumen (GO:0005788)	0.173974	1.72682	0.00793651	0.137541	1	64/222	16.89%	COL1A2;SERPINH1;TNC;MXRA8;COL13A1;TIMP1;COL5A1;PTGS2;LAMB2;WNT7B;PDGFD;COL11A1;TRDN;ARSJ;ADAMTSL1;COL24A1;COL12A1;MFGE8;COL27A1;COL20A1;GHRL;SERPINA10;ADAMTS5;GPC3;BDNF;TSPAN15;IGFBP3;COL4A1;COL8A1;COL9A3;COL16A1;COL10A1;COL4A2;APOA1;ARSI;F3;THBS1;IL23A;ERAP2;RDH5;SGCG;COL23A1;ITIH2;CHRDL1;COL7A1;COL11A2;SPP1;IGFBP5;PDGFB;CP;COL22A1;CCNA2;IGFBP7;SERPIND1;WNT3;F5;IGFBP4;WNT7A;GPX7;TSPAN14;PDGFA;CT…	SST
653	GO_Biological_Process_2023__Potassium Ion Transport (GO:0006813)	0.202974	1.72478	0.00301205	0.137735	1	41/108	20.93%	KCNK18;SLC12A7;KCNS3;KCNS1;SLC9A3;KCNJ2;ATP1A4;KCNH8;LRRC38;KCNG3;SLC24A4;SLC1A3;KCNG1;SLC9C1;KCNJ10;SLC17A7;ABCC9;KCNA1;KCNN4;KCNK9;ATP1A2;SLC9C2;KCNH5;KCNK13;KCNN3;KCNK10;KCNC3;KCNQ5;KCNN2;SLC9A5;KCNH1;KCNN1;KCNIP2;KCNH3;KCNAB3;KCNQ4;KCNMB4;HCN3;SLC24A3;KCNK3;SLC9A1	SST
654	GO_Biological_Process_2023__mRNA Splicing, Via Spliceosome (GO:0000398)	-0.197326	-1.72172	0.00559441	0.162648	1	197/203	76.67%	RNF113A;SCNM1;GEMIN7;LSM7;SF3B5;U2AF1L4;TSSC4;SNU13;DDX41;SNRPD2;HSPA8;PUF60;SF3B6;PQBP1;LSM2;LSM4;RBM42;CACTIN;WDR77;ZMAT2;TFIP11;HNRNPA1;RBMX2;GPKOW;SRSF8;SNRPE;GEMIN6;SNRPB;XAB2;DDX39A;BUD31;ESS2;DHX16;SNRPB2;SYF2;SRSF2;SF3A2;DBR1;SDE2;SF3B4;EIF4A3;WDR83;RBM4B;SRSF7;DHX38;PRMT5;PIN1;LSM3;RBM8A;SNRPD3;BUD13;HTATSF1;RBM22;SF3B2;PRPF31;SNRPG;BCAS2;FRG1;IK;LSM5;CWC25;SF3A1;CWC15;SRSF9;DDX23;RBM19;…	SST
655	GO_Biological_Process_2023__Regulation Of Interleukin-8 Production (GO:0032677)	0.248354	1.7066	0.00595238	0.143982	1	18/53	14.81%	CHI3L1;TLR6;TLR4;TLR2;ANXA1;CLEC7A;SYK;LILRA2;TLR1;SSC5D;RIGI;CD74;CD58;HSPA1B;NOD1;C5AR2;PRKD2;PTPN22	SST
656	KEGG_2021_Human__Human papillomavirus infection	0.156395	1.70571	0	0.144123	1	79/280	18.77%	COL1A2;ITGA8;EGFR;ITGA4;TNC;ATP6V0D2;TBPL2;LAMC3;FZD8;PTGS2;LAMB2;WNT2;WNT7B;NOTCH2;HLA-E;WNT9B;PDGFRB;ITGB4;HEY2;LAMA4;LAMA3;ITGA1;HLA-F;FZD1;VTN;LLGL2;COL4A1;TNN;ITGAV;COL9A3;COL4A2;ITGA2;ITGA11;MX2;CDKN1A;THBS1;LAMC2;LAMA2;TRADD;VWF;FAS;HLA-B;ITGB8;HES7;SPP1;TNFRSF1A;IRF9;MX1;CCNA2;CDK6;LAMA1;PIK3R2;ITGB5;ITGA10;TNXB;LAMB4;ITGA9;ATP6V0A4;WNT3;LAMA5;LLGL1;WNT7A;ITGA5;NOTCH4;RPS6KB2;CCNE2;CCNE1;…	SST
657	GO_Biological_Process_2023__Regulation Of Cell Adhesion (GO:0030155)	0.195034	1.7022	0.0031348	0.145956	1	35/120	16.69%	CXCL12;TNC;TGM2;ANGPT1;PIK3CG;CXCR4;LAMB2;NID1;RAC2;PKHD1;LYN;TGFBI;PLXNB3;ADGRG1;VTN;NRG1;TNN;TESC;ITGAV;TNFSF18;KIF14;PLXNA4;LAMA2;EPHA4;PKP2;ERBB2;FUT2;LAMA1;PTK2B;TNXB;PRKD2;RND1;PRKCA;ZFHX3;PODXL	SST
658	KEGG_2021_Human__MicroRNAs in cancer	0.184841	1.69936	0.00355872	0.147045	1	52/149	23.38%	EGFR;TNC;CD44;IGF2BP1;CDKN2A;CDC25C;PTGS2;SLC45A3;MET;ST14;NOTCH2;PDGFRB;FGFR3;TNN;PDGFRA;CYP1B1;ZFPM2;CDKN1A;THBS1;EZR;PIM1;VIM;ERBB2;BMF;TGFB2;PDGFB;CDK6;PIK3R2;TIMP3;TNXB;WNT3;ITGA5;NOTCH4;PRKCA;CCNE2;CCNE1;PDGFA;TRIM71;PRKCG;HDAC1;BRCA1;DNMT3B;BMI1;EZH2;RPS6KA5;PRKCB;BCL2;IRS1;MCL1;FOXP1;PLCG1;ZEB1	SST
659	GO_Biological_Process_2023__Regulation Of Osteoblast Differentiation (GO:0045667)	0.220116	1.6935	0.00903614	0.150593	1	28/74	20.26%	HGF;SMAD6;SMOC1;FBN2;WNT7B;BMP6;IL6R;YAP1;RANBP3L;BMP7;TNN;SOX9;DNAI3;BMPR1B;FERMT2;PTCH1;LIMD1;CCNA2;CDK6;PRKD1;RUNX2;SCUBE3;FFAR4;CRIM1;WWTR1;DDR2;PPARG;MEF2C	SST
660	GO_Biological_Process_2023__Neuron Projection Guidance (GO:0097485)	0.193615	1.6791	0.00967742	0.157524	1	38/116	20.10%	CXCL12;SEMA3D;PLEKHG4B;SEMA3F;MYPN;NOTCH2;SEMA5B;EFNB1;BDNF;PLA2G10;SLIT1;PRKCQ;SEMA6D;EPHA3;SEMA3E;PLEKHG4;DRAXIN;BOC;SEMA3A;EPHA4;LRTM2;GLI2;NIBAN2;NELL2;ARHGEF25;EPHA6;VASP;CNTN6;EPHB1;CNTN4;SEMA4A;UNC5C;EPHA10;ARHGEF40;NEXN;EPHA7;PTPRO;RPS6KA5	SST
661	KEGG_2021_Human__Pathways in cancer	0.146851	1.67906	0	0.156864	1	119/439	18.35%	CDKN2B;HGF;CASP7;EDNRA;CXCL12;EGFR;LPAR5;LAMC3;TGFA;FZD8;CXCR4;CDKN2A;PTGS2;FGF5;LAMB2;MET;EDN1;WNT2;WNT7B;GSTM5;IL6R;NOTCH2;GNG5;WNT9B;AGT;RAC2;LEF1;IL15RA;PDGFRB;IL4R;EDNRB;HEY2;LAMA4;LAMA3;KIF7;GLI3;PAX8;FGFR4;FZD1;BRCA2;COL4A1;MECOM;FGFR3;ITGAV;PDGFRA;PLCB3;COL4A2;FGF10;ITGA2;SMAD3;GADD45B;CDKN1A;IL23A;LAMC2;RARA;IL15;PIM1;LAMA2;JUP;FGF18;DAPK2;GNG11;RUNX1;FAS;IL12RB2;TGFBR1;MGST1;EGLN2;ERBB2…	SST
662	GO_Biological_Process_2023__Heart Development (GO:0007507)	0.191945	1.67418	0.00299401	0.158173	1	37/125	16.47%	SGCZ;PDLIM4;ERBB4;MESP2;MYL7;PDLIM1;GJA1;GPC3;BMP7;PLCE1;SOX9;AKAP13;ZFPM2;FLRT2;CDKN1A;ID2;POPDC3;PDLIM5;SGCG;POPDC2;TGFBR1;ALPK2;PKP2;CCM2L;GLI2;TGFB2;PDGFB;EEF1AKMT4-ECE2;LDB3;TGFBR3;PCSK5;HEG1;TEK;NTRK3;DNAAF4;KDM6B;TGFB1	SST
663	GO_Cellular_Component_2023__U2-type Spliceosomal Complex (GO:0005684)	-0.232256	-1.66353	0.00879765	0.206371	1	64/89	54.43%	RNF113B;RNF113A;LSM7;SF3B5;SNU13;SNRPD2;SF3B6;LSM2;LSM4;ZMAT2;TFIP11;RBMX2;SNRPE;SNRPB;XAB2;BUD31;DHX16;SNRPB2;SYF2;SF3A2;SF3B4;EIF4A3;LSM3;RBM8A;SNRPD3;BUD13;HTATSF1;RBM22;SF3B2;PRPF31;SNRPG;BCAS2;IK;LSM5;CWC25;SF3A1;CWC15;PPIL1;MAGOHB;PRPF4;MFAP1;U2AF2;SNRNP200;YJU2B;SNIP1;PRPF19;PRPF6;SNRPA1;CCDC12;SNRPD1;PRPF38A;LUC7L2;PLRG1;CASC3;LSM8;TXNL4A;SF3A3;SNRNP70;WBP4;LSM6;CWC22;SNW1;CDC5L;SMU1	SST
664	GO_Biological_Process_2023__Monoatomic Cation Transmembrane Transport (GO:0098655)	0.161819	1.64981	0.00704225	0.164038	1	78/240	21.01%	TRPA1;KCNK18;MCOLN2;MCOLN3;TRPM8;SLC12A7;KCNS3;CNGA3;SCNN1B;KCNS1;SLC9A3;KCNJ2;TRPV5;ATP1A4;KCNH8;SLC30A8;LRRC38;TRPV4;KCNG3;TRPM3;ASIC4;TRPC5;SLC24A4;SLC1A3;ITGAV;ATP2C2;CACNG1;KCNG1;TRPC3;SLC9C1;FXYD2;CNGB3;SLC11A1;SLC4A4;CNGA1;ABCC9;KCNA1;KCNN4;KCNK9;ATP1A2;UCP3;SLC9C2;KCNH5;KCNK13;CNGB1;ATP2B4;KCNN3;CNGA4;ASIC2;SLC39A8;KCNK10;TRPV1;ATP6V0A4;SCN4B;KCNC3;KCNQ5;KCNN2;SLC6A13;NOX5;SLC9A5;SLC12A1;…	SST
665	MSigDB_Hallmark_2020__KRAS Signaling Up	-0.199509	-1.64485	0.00554785	0.219859	1	55/166	20.01%	IRF8;USH1C;RGS16;FCER1G;TRIB1;SPON1;CD37;PSMB8;GUCY1A1;CBX8;IL33;IKZF1;IL1RL2;PRRX1;RELN;ANGPTL4;TRIB2;BTC;LCP1;NRP1;ALDH1A3;PDCD1LG2;G0S2;SEMA3B;GPNMB;C3AR1;NR1H4;ETV1;MAP4K1;F2RL1;ADAM8;MMP9;IL10RA;PRKG2;DUSP6;ETS1;BMP2;RBP4;PCP4;ETV5;HSD11B1;MMP11;LAPTM5;YRDC;TPH1;SCG5;EREG;MYCN;TRAF1;HBEGF;PLAUR;PCSK1N;BIRC3;CA2;ARG1	SST
666	GO_Biological_Process_2023__Chloride Transport (GO:0006821)	0.230956	1.63574	0.00862069	0.167258	1	24/65	20.49%	SLC12A7;NMUR1;CLCN1;FXYD1;CLIC1;SLC26A1;GABRG1;SLC1A3;GLRA2;SLC26A7;SLC17A7;ANO3;GLRA1;BEST1;CLIC4;ANO7;GABRA6;SLC12A1;ANO6;SLC26A5;TTYH3;SLC12A8;GABRA3;GABRB2	SST
667	GO_Biological_Process_2023__Positive Regulation Of Cell Migration (GO:0030335)	0.161335	1.63552	0.00346021	0.166798	1	67/229	18.85%	TRIP6;AIF1;HGF;CXCL12;EGFR;SEMA3D;CXCR4;DOCK5;SEMA3F;EDN1;PDGFD;CLEC7A;SEMA5B;VSIR;LEF1;PDGFRB;PECAM1;PDPN;VTN;ROR2;NCKAP1L;PDGFRA;TNFSF18;FAM83H;ZNF703;SOX9;GCNT2;FGF10;SEMA6D;SEMA3E;THBS1;FAM107A;LAMC2;TRADD;SEMA3A;TGFBR1;EPHA4;CASS4;FERMT1;RREB1;FLT1;FERMT2;TGFB2;VIL1;PDGFB;ARHGEF39;CCNA2;PTK2B;TCAF2;ZP3;NTRK3;CTSH;SUN2;PRKCA;CLDN4;TGFB1;PODXL;ITGA6;SEMA4A;PDGFA;CARMIL1;MYLK;CEMIP;MYO1C;FZD4;A…	SST
668	WikiPathway_2023_Human__Nuclear Receptors Meta Pathway WP2882	0.16092	1.63497	0.00787402	0.166112	1	68/228	18.96%	HGF;EGFR;TNFAIP3;TGFA;PTGS2;FKBP5;ABCB4;PDK4;AGER;GSTM5;MFGE8;ALOX5AP;SLC39A12;SRGN;PMP2;CES3;SLC5A11;ABCC3;CYP3A4;NR1I3;ACKR3;SLC2A5;NRG1;CYP1B1;APOA1;EPHA3;AKAP13;BHLHE40;GADD45B;POU5F1;MYOF;MGST1;SLCO2B1;CAVIN2;MAFF;SLC2A12;ABCC2;PLTP;SLC2A14;CPT1A;TGFB2;VDR;PDGFB;SLC2A9;ESR1;TGFBR3;GPR153;SLC39A8;GSTM2;GCC1;CES5A;JUN;SLC2A1;JUND;ABCC4;SLC6A13;PPARGC1A;STOM;BAAT;TGFB1;EHHADH;G6PD;CES2;SULT1A1;…	SST
669	MSigDB_Hallmark_2020__Apical Junction	0.173435	1.62907	0.00420168	0.167789	1	69/171	27.08%	CLDN14;CD86;EGFR;CLDN5;ACTN3;DSC3;SYK;RAC2;TGFBI;MAP3K20;ITGB4;CDH6;ADAMTS5;PECAM1;LAMA3;ICAM1;MYH9;CLDN11;COL16A1;FYB1;ITGA2;BMP1;LAMC2;CD34;LDLRAP1;AMH;CLDN15;JUP;VWF;CALB2;CDH11;ACTN1;B4GALT1;VASP;ITGA10;ITGA9;MSN;SORBS3;NECTIN1;CLDN4;ARHGEF6;ACTN2;NEGR1;BAIAP2;ADAM15;RHOF;NEXN;CDH3;NECTIN2;MAPK13;KCNH2;NLGN2;IRS1;NLGN3;CDH4;PLCG1;SRC;LIMA1;CDH8;RSU1;CTNND1;NRXN2;VAV2;PCDH1;SYMPK;NF2;ACTN4;ITG…	SST
670	GO_Biological_Process_2023__Regulation Of MAPK Cascade (GO:0043408)	-0.195759	-1.62582	0.00843882	0.238996	1	67/166	28.30%	KDR;EPHA8;HRAS;DUSP5;RRAS;IL11;WDR54;VRK2;CAV1;PTPN6;PTPRC;ADRA2A;KIT;SLA;REN;GPER1;GPR37L1;ART4;GREM1;HLA-DRB1;CAV3;MAP4K1;IGFBP6;LAMTOR1;ADRA1B;GFRAL;DUSP4;FAM83D;DUSP6;BMP2;DUSP2;CD24;JCAD;PHB2;SPRED3;CSF1R;LAPTM5;FGFR2;FGF2;DOK3;DUSP7;ADRA1D;PLCG2;CD81;LPAR1;CEACAM1;LBH;CAV2;GPR37;GSTP1;DOK4;SOD1;PEBP1;WWC1;DUSP1;PPIA;TRIM5;SHC1;EGF;MYDGF;AVPI1;SOX2;FN1;PSMD10;ZNF622;MAPK3;RET	SST
671	GO_Biological_Process_2023__Proteolysis (GO:0006508)	0.158963	1.62442	0.00403226	0.170969	1	53/238	12.82%	ADAMTS12;AEBP1;MME;KLK4;HGF;ADAMTS14;CASP7;ECE2;PGC;KEL;CPB1;CXCR4;ADAMTS2;GGT5;CEL;ST14;CAPN8;CAPN13;PLAT;SRGN;ACE;CTRC;ADAM12;ADAMTS5;ANPEP;ENPEP;BACE2;CAPN12;LPA;LVRN;KLK14;ADAMTS17;TLL1;NPEPL1;ADAMTS1;PCSK6;BMP1;MMP26;ADAMTS16;ERAP2;VASH2;ADAMTS3;TMPRSS7;ADGRV1;CNDP1;ADAMTS19;MMP17;PTCH1;EEF1AKMT4-ECE2;F12;PHEX;PCSK5;TMPRSS5	SST
672	KEGG_2021_Human__Proteoglycans in cancer	0.171119	1.62232	0	0.170539	1	57/180	21.18%	COL1A2;HGF;SDC4;EGFR;CD44;TLR4;FZD8;TLR2;ERBB4;MET;WNT2;WNT7B;HPSE2;WNT9B;ITPR2;GPC3;PLCE1;FZD1;VTN;HCLS1;ITGAV;ITGA2;CDKN1A;THBS1;EZR;NANOG;FAS;ERBB2;TGFB2;PTCH1;ESR1;SDC1;FGFR1;HSPG2;PIK3R2;ITGB5;TIMP3;MSN;WNT3;TFAP4;WNT7A;ITGA5;PRKCA;RPS6KB2;TGFB1;WNT2B;FLNA;ARHGEF1;PRKCG;FZD4;PXN;RRAS2;PRKCB;WNT5B;ELK1;SLC9A1;MAPK13	SST
673	GO_Biological_Process_2023__Regulation Of Cell Migration (GO:0030334)	0.143001	1.60088	0.00431034	0.180552	1	104/365	19.78%	TRIP6;AIF1;HGF;CXCL12;EGFR;TNC;CLDN5;SEMA3D;DOCK10;CXCR4;ERBB4;FGF5;ANXA1;SEMA3F;EDN1;PTPRT;PTPRK;PODN;BST2;PDGFD;CLEC7A;SEMA5B;EMILIN2;PRR5L;VSIR;ACE;LEF1;PDGFRB;PECAM1;PLXNB3;TMIGD3;DRD2;PDPN;ROR2;TP53INP1;TNN;PDGFRA;FAM83H;ZNF703;CYP1B1;GCNT2;SEMA6D;SEMA3E;DNAI3;KIF14;THBS1;FAM107A;LAMC2;PLXNA4;AMH;TRADD;FGF18;TMSB4Y;TGFBR1;EPHA4;CASS4;SERPINE2;AMOT;RIGI;CD74;FLT1;FERMT2;CLIC4;IGFBP5;VIL1;PDGF…	SST
674	GO_Biological_Process_2023__Proteasome-Mediated Ubiquitin-Dependent Protein Catabolic Process (GO:0043161)	-0.170018	-1.599	0.00795756	0.255603	1	283/305	74.24%	FBXL22;ECRG4;ASB2;SPSB4;FBXL7;RNF5;DDIT3;NHLRC1;PEX12;IFI27;SPSB3;DERL3;PEX10;STUB1;PSMC5;TMUB1;UBE2S;UBXN10;WFS1;ANAPC15;TMEM129;ZFAND2B;SPSB2;UBXN1;ANKRD9;PSMB6;FBXL15;PSMD8;PSMA7;SEC61B;KAT5;ANAPC11;RNF187;ANAPC2;TBL1X;FBXL6;KCTD17;SELENOS;KBTBD7;ANAPC13;CALR;CDC34;DNAJB9;UBXN8;FBXO2;CCNF;ZFAND2A;FBXO6;FEM1A;PSMC3;RNF126;BAG6;DMAC2;TMUB2;HSPA5;FBXW5;KCTD5;USP19;PSMB5;RHBDD2;GSK3A;CDC26;PSMB4;P…	SST
675	GO_Biological_Process_2023__Positive Regulation Of Cell Projection Organization (GO:0031346)	0.183437	1.5949	0.00617284	0.182377	1	39/112	23.00%	ZNF804A;ROR1;CUX2;CHODL;TOX;LYN;GPC2;PLXNB3;BDNF;FZD1;ROR2;TNN;RIT2;EPHA3;PLXNA4;PTK7;PROM2;SCARF1;CDKL3;PTK2B;PRKD1;NTRK3;CUL7;ITGA6;CARMIL1;FZD4;DDR2;PLXNB2;CAMK1D;AVIL;PLXNA1;NLGN1;DLG4;P3H1;FUT9;PLXNA2;STYXL1;TENM3;DAB2IP	SST
676	GO_Biological_Process_2023__Positive Regulation Of Transferase Activity (GO:0051347)	0.176179	1.56563	0.00671141	0.198193	1	36/120	19.05%	ROS1;EGFR;ROR1;ERBB4;MERTK;MET;AGT;AXL;PDGFRB;FGFR4;ROR2;GINS4;PRKCQ;FGFR3;PDGFRA;APOA1;DRD4;CD4;ERBB2;CD74;FLT1;DSCC1;FGFR1;TEK;NTRK3;RFC3;TGFB1;TYRO3;NEK7;BMI1;PKIB;RFC2;ZNF16;GINS1;DDR2;CHRNA7	SST
677	GO_Molecular_Function_2023__Metallopeptidase Activity (GO:0008237)	0.194336	1.56451	0.00632911	0.198801	1	25/98	12.76%	ADAMTS12;MME;ADAMTS14;ECE2;KEL;ACE2;CXCR4;ADAMTS2;ADAM12;ADAMTS5;ANPEP;ADAMTS17;TLL1;ADAMTS1;BMP1;ASTL;MMP26;ADAMTS16;ERAP2;ADAMTS3;ADAMTS19;DEPDC1B;MMP17;EEF1AKMT4-ECE2;PHEX	SST
678	GO_Cellular_Component_2023__Basolateral Plasma Membrane (GO:0016323)	0.171101	1.53958	0.00609756	0.21359	1	45/145	18.96%	EGFR;CD44;TGFA;ERBB4;CALHM1;SLC14A1;PTH1R;SLC16A12;ENPP1;AQP4;ABCC3;ANXA2;SLC26A1;PDPN;AQP8;SLC7A7;SLC26A7;EZR;C5AR1;SLC4A4;ALPK2;MARVELD2;ERBB2;BEST1;SLC16A8;PDGFB;B4GALT1;NOD1;AQP7B;TEK;VSIG1;SLC39A8;EPB41;RAB17;SLC2A1;PLPP3;MYO1D;ABCC4;AJAP1;SLC6A13;LRRK2;TRPC4;SLC19A1;SLC26A5;SLC7A5	SST
679	GO_Biological_Process_2023__Positive Regulation Of Cell Population Proliferation (GO:0008284)	-0.160627	-1.53617	0.00524934	0.297809	1	107/373	19.48%	IL31RA;HES1;CDCA7L;PTGFR;PRTN3;KDR;SPHK1;CTF1;HRAS;HPSE;VEGFC;AQP1;BAMBI;ROMO1;IL5RA;IL11;IL18;TGFBR2;ITGAX;S1PR3;SHH;SCN5A;PDGFC;NODAL;SINHCAF;AVPR1A;HES5;PTPN6;PTPRC;ADRA2A;CCL5;SFRP1;NOTCH1;FGF20;CR1;CSF1;SOX15;FZD9;CLEC11A;BTC;PTHLH;FGF22;GPER1;SOX8;HMGA2;MEIS1;GREM1;POU3F2;HTR1A;OSMR;DPP4;SOX4;SLC25A5;FGF1;FOXM1;CIB1;TNFRSF11A;NME1;TSHR;RPS4X;NR4A3;FGF8;E2F1;IL11RA;HCK;PROX1;MDK;LRP5;DHPS;EP…	SST
680	GO_Biological_Process_2023__Positive Regulation Of Protein Phosphorylation (GO:0001934)	0.137562	1.49363	0.0045045	0.239097	1	84/306	19.35%	CHI3L1;INHBB;HGF;CARTPT;EGFR;GDF7;CD44;BMP3;ANGPT1;INHBA;ERBB4;FGF5;NIBAN1;BMP6;AGER;PDGFD;IL6R;AGT;LYN;GDF15;PECAM1;BDNF;BMP7;VTN;FAM20A;THPO;HCLS1;SOX9;FGF10;CDKN1A;ADCYAP1;MMD2;IL15;CD4;AMH;FGF18;NGF;FAS;TGFBR1;GDF9;PELI2;BMP8A;ERBB2;CD74;NOS1;HFE;TGFB2;GHR;PDGFB;PROM2;TGFB3;BMP8B;ENG;FAXDC2;OPRD1;ATP2B4;MAP3K5;CCNA2;PTK2B;TNXB;TEK;PRKD1;NTRK3;PRKD2;RASGRP1;INCENP;FGF17;BCAR3;ITGA5;TGFB1;PDGFA…	SST
681	KEGG_2021_Human__Ribosome	-0.591383	-4.88559	0	0	0	103/129	26.11%	MRPL17;MRPL28;MRPL11;RPL8;MRPL12;MRPS17;MRPL21;RPS27;RPL3;RPL7A;RPLP0;RPS17;FAU;RPL7;MRPL23;RPS3A;RPL27;RPS10;MRPS12;RPL18A;MRPL34;MRPL36;RPS27A;MRPS7;RPL18;RPL9;RPS16;RPL38;RPL36;UBA52;RPL21;RPL19;RPL41;RPS13;RPL29;MRPS10;MRPS18A;RPS7;RPS18;RPL10A;RPL22L1;MRPS2;RPL36AL;RPL26L1;RPL13;RPL10;RPLP1;RPS2;MRPL4;RPL17;RPS9;RPLP2;RPS15;RPL23A;MRPL35;MRPL27;RPL15;RPS28;RPL13A;RPS23;RPS11;RPL39;RPS14;MRPL…	PVALBChC
682	GO_Biological_Process_2023__Cytoplasmic Translation (GO:0002181)	-0.605137	-4.5109	0	0	0	74/92	25.10%	RPL8;RPS27;RPL3;RPL7A;RPLP0;RPS17;FAU;RPL7;RPS3A;RPL27;RPS10;MRPS12;RPL18A;RPS27A;RPL18;RPL9;RPS16;RPL38;RPL36;UBA52;RPL21;RPL19;RPL41;RPS13;RPL29;RPS7;RPS18;RPL10A;RPL22L1;RPL36AL;RPL26L1;RPL13;RPL10;RPLP1;RPS2;RPL17;RPS9;RPLP2;RPS15;RPL23A;RPL15;RPS28;RACK1;RPL13A;RPS23;RPS11;DRG2;RPL39;RPS14;RPS5;RPS21;RPL24;RPL26;RPS4X;RPL28;RPS25;RPL35;RPL32;EIF4A1;RPL35A;RPL5;RPS15A;EIF3I;EIF4A2;RPSA;RPL30;…	PVALBChC
683	GO_Biological_Process_2023__Peptide Biosynthetic Process (GO:0043043)	-0.529399	-4.5024	0	0	0	113/143	32.30%	MRPL28;MRPL11;RPL8;MRPL12;MRPS17;DHPS;GSPT2;MRPL55;RPS27;RPL3;RPL7A;RPLP0;RPS17;FAU;RPL7;MRPL23;RPS3A;RPL27;RPS10;MRPS12;RPL18A;CARNS1;MRPL34;MRPL36;RPS27A;PCSK1;MRPS7;RPL18;RPL9;RPS16;RPL38;RPL36;RPL21;RPL19;RPL41;RPS13;RPL29;MRPS18A;MRPS18B;RPS7;RPS18;RPL10A;RPL36AL;EEF1A2;RPL13;RPL10;MRPL43;RPLP1;RPS2;RPL17;RPS9;RPLP2;MRPL51;RPS15;RPL23A;RPS6KB2;MRPL35;MRPL27;RPL15;RPS28;RPL13A;RPS23;RPS11;RPL…	PVALBChC
684	WikiPathway_2023_Human__Cytoplasmic Ribosomal Proteins WP477	-0.609679	-4.46311	0	0	0	71/87	26.11%	RPL8;RPS27;RPL3;RPL7A;RPLP0;RPS17;FAU;RPL7;RPS6KA1;RPS3A;RPL27;RPS10;RPL18A;RPS27A;RPL18;RPL9;RPS16;RPL38;RPL36;UBA52;RPL21;RPL19;RPL41;RPS13;RPL29;RPS7;RPS18;RPL10A;RPL13;RPL10;RPLP1;RPS2;RPL17;RPS9;RPLP2;RPS15;RPL23A;RPS6KB2;RPL15;RPS28;RPL13A;RPS23;RPS11;RPL39;RPS14;RPS5;RPS21;RPL24;RPL26;RPS12;RPL23;RPS4X;RPL28;RPS25;RPL35;RPL32;RPL35A;RPL5;RPS15A;RPSA;RPL30;RPL6;RPL12;RPS26;RPL14;RPL4;RPL31;…	PVALBChC
685	GO_Cellular_Component_2023__Cytosolic Large Ribosomal Subunit (GO:0022625)	-0.688553	-4.19043	0	0	0	43/47	25.10%	RPL8;RPL3;RPL7A;RPLP0;RPL7;RPL27;RPL18A;RPL18;RPL9;RPL38;RPL36;UBA52;RPL21;RPL19;RPL41;RPL29;RPL10A;RPL36AL;RPL26L1;RPL13;RPLP1;RPL17;RPLP2;RPL23A;RPL15;RPL13A;RPL39;RPL24;RPL26;RPL28;RPL35;RPL7L1;RPL32;RPL35A;RPL5;RPL30;RPL6;RPL12;RPL14;RPL4;RPL31;RPL27A;RPL11	PVALBChC
686	GO_Cellular_Component_2023__Large Ribosomal Subunit (GO:0015934)	-0.688553	-4.19043	0	0	0	43/47	25.10%	RPL8;RPL3;RPL7A;RPLP0;RPL7;RPL27;RPL18A;RPL18;RPL9;RPL38;RPL36;UBA52;RPL21;RPL19;RPL41;RPL29;RPL10A;RPL36AL;RPL26L1;RPL13;RPLP1;RPL17;RPLP2;RPL23A;RPL15;RPL13A;RPL39;RPL24;RPL26;RPL28;RPL35;RPL7L1;RPL32;RPL35A;RPL5;RPL30;RPL6;RPL12;RPL14;RPL4;RPL31;RPL27A;RPL11	PVALBChC
687	GO_Biological_Process_2023__Macromolecule Biosynthetic Process (GO:0009059)	-0.475705	-4.15981	0	0	0	122/168	32.30%	MRPL28;MRPL11;RPL8;MRPL12;MRPS17;DHPS;GSPT2;MRPL55;EIF5A;APOE;RPS27;RPL3;RPL7A;RPLP0;RPS17;FAU;RPL7;MRPL23;RPS3A;EEF1B2;RPL27;RPS10;MRPS12;RPL18A;MRPL34;MRPL36;RPS27A;TUFM;MRPS7;RPL18;RPL9;RPS16;RPL38;RPL36;ALAS1;RPL21;RPL19;RPL41;RPS13;RPL29;MRPS18A;MRPS18B;RPS7;RPS18;RPL10A;RPL36AL;EEF1A2;RPL13;RPL10;MRPL43;RPLP1;RPS2;RPL17;RPS9;RPLP2;MRPL51;RPS15;RPL23A;RPS6KB2;MRPL35;MRPL27;RPL15;RPS28;RPL13A…	PVALBChC
688	GO_Biological_Process_2023__Translation (GO:0006412)	-0.445852	-4.14938	0	0	0	150/221	32.30%	MRPL54;MRPL17;MRPS28;MRPL28;MRPL11;QARS1;MRPL40;AURKAIP1;RPL8;MRPL12;MRPS17;MRPS34;DHPS;GSPT2;MRPL55;EIF5A;GADD45GIP1;MRPL21;RPS27;RPL3;RPL7A;RPLP0;RPS17;FAU;RPL7;MRPL23;RPS3A;EEF1B2;RPL27;RPS10;MRPS12;RPL18A;MRPL34;MRPL36;RPS27A;TUFM;MRPS7;RPL18;RPL9;RPS16;RPL38;RPL36;UBA52;RPL21;RPL19;RPL41;MRPL58;RPS13;MRPL49;RPL29;MRPS10;MRPS18A;MRPS18B;RPS7;RPS18;RPL10A;RPL22L1;MRPS2;RPL36AL;EEF1A2;RPL26L1;R…	PVALBChC
689	WikiPathway_2023_Human__Electron Transport Chain OXPHOS System In Mitochondria WP111	-0.560722	-4.13188	0	0	0	64/87	25.40%	NDUFV2;NDUFB8;SLC25A5;NDUFC2;ATP5PO;SURF1;ATP5MF;COX7C;NDUFA2;ATP5MC1;UQCR10;COX6A1;NDUFA13;COX5B;NDUFS5;COX4I1;ATP5F1D;COX8A;NDUFB10;COX6B1;NDUFA4;ATP5PF;ATP5MC3;NDUFA6;NDUFS3;COX7A1;ATP5ME;NDUFS8;NDUFS7;UQCRFS1;UQCR11;NDUFA11;COX7B;NDUFB7;ATP5PD;NDUFA1;ATP5F1E;COX7A2;ATP5F1B;COX5A;SLC25A4;NDUFB5;NDUFB9;UQCRQ;NDUFAB1;COX6C;ATP5IF1;NDUFV1;NDUFC1;UQCRC1;NDUFA3;NDUFS6;NDUFB2;UCP3;UQCRB;NDUFA12;ATP5…	PVALBChC
690	GO_Biological_Process_2023__Cellular Respiration (GO:0045333)	-0.554667	-4.00669	0	0	0	58/81	25.40%	MTLN;NDUFV2;NDUFB8;NDUFC2;CYC1;SURF1;ETFB;COX7C;NDUFA2;NR4A3;UQCR10;COX6A1;NDUFA13;COX5B;NDUFS5;COX4I1;COX8A;NDUFB10;COX6B1;NDUFA4;NDUFA6;NDUFS3;NDUFS8;NDUFB11;NDUFS7;UQCRFS1;UQCR11;NDUFA11;COX7B;BLOC1S1;NDUFB7;NDUFA1;COX7A2;CYCS;COX5A;CHCHD5;OXA1L;MTFR1L;MDH2;NDUFB5;NDUFB9;UQCRQ;NDUFAB1;COX6C;NDUFV1;NDUFC1;UQCRC1;NDUFA3;NDUFS6;NDUFB2;UQCRB;NDUFA12;NDUFB4;SDHA;UQCRH;COX15;NDUFA8;NDUFS2	PVALBChC
691	GO_Biological_Process_2023__Aerobic Electron Transport Chain (GO:0019646)	-0.592885	-3.95779	0	0	0	49/63	25.40%	NDUFV2;NDUFB8;NDUFC2;CYC1;COX7C;NDUFA2;UQCR10;COX6A1;COX5B;NDUFS5;COX4I1;COX8A;NDUFB10;COX6B1;UQCC3;NDUFA4;NDUFA6;NDUFS3;NDUFS8;SLC25A51;NDUFS7;SDHAF2;UQCRFS1;UQCR11;COX7B;NDUFB7;NDUFA1;COX7A2;CYCS;COX5A;NDUFB5;NDUFB9;UQCRQ;NDUFAB1;COX6C;NDUFV1;NDUFC1;UQCRC1;NDUFA3;NDUFS6;NDUFB2;UQCRB;NDUFB4;SDHA;UQCRH;COX15;SDHD;NDUFA8;NDUFS2	PVALBChC
692	GO_Biological_Process_2023__Mitochondrial ATP Synthesis Coupled Electron Transport (GO:0042775)	-0.570401	-3.87901	0	0	0	49/65	25.40%	NDUFV2;NDUFB8;NDUFC2;CYC1;COX7C;NDUFA2;UQCR10;COX6A1;COX5B;NDUFS5;COX4I1;COX8A;NDUFB10;COX6B1;UQCC3;NDUFA4;NDUFA6;NDUFS3;NDUFS8;NDUFS7;SDHAF2;UQCRFS1;UQCR11;COX7B;NDUFB7;NDUFA1;COX7A2;CYCS;COX5A;NDUFB5;NDUFB9;UQCRQ;NDUFAB1;COX6C;NDUFV1;NDUFC1;UQCRC1;NDUFA3;NDUFS6;NDUFB2;UQCRB;NDUFA12;NDUFB4;SDHA;UQCRH;COX15;SDHD;NDUFA8;NDUFS2	PVALBChC
693	KEGG_2021_Human__Coronavirus disease	-0.442129	-3.79487	0	0	0	96/153	26.29%	RPL8;IKBKG;MASP2;FOS;RPS27;IRF9;RPL3;RPL7A;RPLP0;RPS17;FAU;RPL7;RPS3A;RPL27;MAPK12;C3;RPS10;RPL18A;RELA;RPS27A;RPL18;RPL9;RPS16;RPL38;SYK;RPL36;UBA52;RPL21;RPL19;RPL41;RPS13;RPL29;RPS7;RPS18;RPL10A;RPL22L1;RPL36AL;RPL26L1;RPL13;RPL10;RPLP1;RPS2;RPL17;RPS9;RPLP2;RPS15;NFKBIB;RPL23A;JUN;RPL15;RPS28;RPL13A;RPS23;RPS11;MX1;RPL39;RPS14;RPS5;PIK3R2;HBEGF;NFKBIA;RPS21;ISG15;RPL24;RPL26;RPS12;IRAK4;RPL23…	PVALBChC
694	GO_Cellular_Component_2023__Mitochondrial Inner Membrane (GO:0005743)	-0.371039	-3.76178	0	0	0	244/331	44.64%	TIMM10;MRPL54;MTLN;TIMM13;NDUFV2;NDUFB8;AIFM3;SLC25A5;MRPL17;NDUFC2;CYC1;MRPS28;MRPL28;ATP5PO;MRPL11;MICOS13;MRPL40;SLC25A1;COA3;AURKAIP1;MRPL12;MRPS17;ATP5MF;MRPS34;COX7C;NDUFA2;ATP5MC1;UQCR10;COX6A1;NDUFA13;MRPL55;COX5B;NDUFAF3;SLC25A11;GADD45GIP1;TIMM17B;NDUFS5;ENDOG;COX4I1;ATP5F1D;MRPL21;COX8A;NDUFB10;COX6B1;TMEM160;SHMT2;ATP5MK;MRPL23;UQCC3;BCS1L;NDUFA4;MRPS12;ATP5PF;ATP5MC3;PARL;MRPL34;NDUF…	PVALBChC
695	KEGG_2021_Human__Oxidative phosphorylation	-0.478032	-3.70157	0	0	0	67/105	25.40%	NDUFV2;NDUFB8;NDUFC2;CYC1;ATP5PO;ATP6V1F;ATP5MF;COX7C;NDUFA2;ATP5MC1;UQCR10;COX6A1;NDUFA13;COX5B;NDUFS5;COX4I1;ATP5F1D;COX8A;NDUFB10;COX6B1;ATP6V0B;NDUFA4;ATP5PF;ATP5MC3;NDUFA6;ATP6AP1;NDUFS3;COX7A1;ATP5ME;NDUFS8;NDUFB11;NDUFS7;ATP6V1G1;UQCRFS1;UQCR11;NDUFA11;COX7B;NDUFB7;ATP5PD;NDUFA1;ATP5F1E;COX7A2;ATP5F1B;COX5A;ATP6V1G2;NDUFB5;NDUFB9;UQCRQ;NDUFAB1;COX6C;NDUFV1;NDUFC1;UQCRC1;NDUFA3;NDUFS6;NDUFB…	PVALBChC
696	GO_Cellular_Component_2023__Organelle Inner Membrane (GO:0019866)	-0.358209	-3.65563	0	0	0	252/349	44.64%	TIMM10;MRPL54;MTLN;TIMM13;NDUFV2;NDUFB8;AIFM3;SLC25A5;MRPL17;NDUFC2;CYC1;MRPS28;MRPL28;ATP5PO;MRPL11;MICOS13;MRPL40;SLC25A1;COA3;AURKAIP1;MRPL12;MRPS17;ATP5MF;MRPS34;COX7C;NDUFA2;ATP5MC1;UQCR10;COX6A1;NDUFA13;MRPL55;COX5B;NDUFAF3;SLC25A11;GADD45GIP1;TIMM17B;NDUFS5;ENDOG;COX4I1;ATP5F1D;MRPL21;COX8A;NDUFB10;COX6B1;TMEM160;SHMT2;ATP5MK;MRPL23;UQCC3;BCS1L;NDUFA4;MRPS12;ATP5PF;ATP5MC3;PARL;MRPL34;NDUF…	PVALBChC
697	GO_Biological_Process_2023__Oxidative Phosphorylation (GO:0006119)	-0.560507	-3.64257	0	0	0	43/59	25.40%	NDUFV2;NDUFB8;NDUFC2;ATP5PO;ATP5MF;NDUFA2;NDUFA13;CHCHD10;NDUFS5;ATP5F1D;NDUFB10;ATP5PF;NDUFA6;NDUFS3;ATP5ME;NDUFS8;SLC25A51;NDUFB11;NDUFS7;NDUFA11;NDUFB7;ATP5PD;NDUFA1;ATP5F1E;ATP5F1B;NDUFB5;NDUFB9;NDUFAB1;NDUFV1;NDUFC1;UQCRC1;NDUFA3;NDUFS6;NDUFB2;UQCRB;NDUFA12;ATP5PB;NDUFB4;SDHA;UQCRH;SDHD;NDUFA8;NDUFS2	PVALBChC
698	GO_Molecular_Function_2023__Oxidoreduction-Driven Active Transmembrane Transporter Activity (GO:0015453)	-0.572735	-3.62082	0	0	0	39/51	25.40%	NDUFV2;NDUFB8;NDUFC2;COX7C;NDUFA2;UQCR10;COX5B;NDUFS5;COX4I1;COX8A;NDUFB10;COX6B1;NDUFA4;NDUFA6;NDUFS3;COX7A1;NDUFS8;NDUFS7;CYB561A3;CYB561D2;CYBRD1;COX7B;NDUFB7;NDUFA1;COX5A;NDUFB5;NDUFB9;NDUFV1;NDUFC1;UQCRC1;NDUFA3;NDUFS6;NDUFB2;UQCRB;NDUFA12;NDUFB4;UQCRH;NDUFA8;NDUFS2	PVALBChC
699	GO_Biological_Process_2023__Proton Motive Force-Driven ATP Synthesis (GO:0015986)	-0.56384	-3.61973	0	0	0	42/57	25.40%	NDUFV2;NDUFB8;NDUFC2;ATP5PO;ATP5MF;NDUFA2;ATP5MC1;NDUFA13;NDUFS5;ATP5F1D;NDUFB10;ATP5MK;ATP5PF;ATP5MC3;NDUFA6;NDUFS3;ATP5ME;NDUFS8;NDUFB11;NDUFS7;ATP5MJ;NDUFA11;NDUFB7;ATP5PD;NDUFA1;ATP5F1E;ATP5F1B;NDUFB5;NDUFB9;NDUFAB1;NDUFV1;NDUFC1;NDUFA3;NDUFS6;NDUFB2;NDUFA12;ATP5PB;NDUFB4;SDHA;SDHD;NDUFA8;NDUFS2	PVALBChC
700	KEGG_2021_Human__Parkinson disease	-0.393761	-3.61517	0	0	0	128/205	33.04%	NDUFV2;NDUFB8;SLC25A5;NDUFC2;CYC1;ATP5PO;COX7C;NDUFA2;ATP5MC1;UQCR10;COX6A1;PSMB4;NDUFA13;COX5B;NDUFS5;COX4I1;ATP5F1D;COX8A;NDUFB10;TUBA4A;COX6B1;PSMB6;TP53;DUSP1;NDUFA4;BAX;ATP5PF;ATP5MC3;TUBB2A;TUBA1B;NDUFA6;RPS27A;NDUFS3;COX7A1;TUBB4B;NDUFS8;UBA52;NDUFB11;MAOA;NDUFS7;GPR37;UQCRFS1;UQCR11;PSMC4;TUBB3;ADRM1;NDUFA11;CALM2;COX7B;NDUFB7;ATF4;ATP5PD;HTRA2;NDUFA1;HSPA5;TUBA1A;PSMB5;TXN2;PSMD8;ATP5F1E…	PVALBChC
701	MSigDB_Hallmark_2020__Oxidative Phosphorylation	-0.400786	-3.59944	0	0	0	125/192	34.97%	TIMM10;TIMM13;NDUFV2;NDUFB8;SLC25A5;NDUFC2;CYC1;ATP5PO;SURF1;MRPL11;ATP6V1F;GPX4;ATP5MF;ETFB;COX7C;NDUFA2;ATP5MC1;UQCR10;COX6A1;COX5B;SLC25A11;COX4I1;ATP5F1D;COX8A;ECH1;COX6B1;ATP6V0B;TOMM22;HSD17B10;NDUFA4;LDHA;MRPS12;BAX;ATP5PF;ATP5MC3;MRPL34;NDUFA6;ATP6AP1;NDUFS3;ATP5ME;NDUFS8;IDH3B;ALAS1;NDUFS7;ATP6V1G1;UQCRFS1;UQCR11;PDHB;COX7B;NDUFB7;ATP5PD;HTRA2;NDUFA1;LDHB;MRPL35;TIMM8B;ISCU;PHB2;ATP5F1E;…	PVALBChC
702	GO_Biological_Process_2023__Proton Motive Force-Driven Mitochondrial ATP Synthesis (GO:0042776)	-0.570891	-3.52574	0	0	0	38/51	25.40%	NDUFV2;NDUFB8;NDUFC2;ATP5PO;ATP5MF;NDUFA2;NDUFA13;NDUFS5;ATP5F1D;NDUFB10;ATP5PF;NDUFA6;NDUFS3;ATP5ME;NDUFS8;NDUFB11;NDUFS7;NDUFA11;NDUFB7;ATP5PD;NDUFA1;ATP5F1E;ATP5F1B;NDUFB5;NDUFB9;NDUFAB1;NDUFV1;NDUFC1;NDUFA3;NDUFS6;NDUFB2;NDUFA12;ATP5PB;NDUFB4;SDHA;SDHD;NDUFA8;NDUFS2	PVALBChC
703	GO_Cellular_Component_2023__Ribosome (GO:0005840)	-0.538213	-3.50022	0	0	0	40/57	25.10%	RPL8;RPS27;RPL7A;RPS17;RPL27;RPS10;MRPS12;RPL18A;MRPS7;RPL18;RPL9;RPL38;RPL36;RPL19;RPL41;BTF3;RPS13;RPS7;RPS18;RPL10A;RPL36AL;RPL17;RPS9;RPL15;RPS28;RPL13A;RPS23;RPS11;RPL39;RPS5;RPS21;RPL24;RPS4X;RPS25;RPL32;RPL30;RPL6;RPS26;RPL31;RPL11	PVALBChC
704	GO_Cellular_Component_2023__Small Ribosomal Subunit (GO:0015935)	-0.603467	-3.48489	0	0	0	34/38	32.30%	RPS27;RPS17;FAU;RPS3A;RPS10;MRPS12;RPS27A;RPS16;UBA52;RPS13;RPS7;RPS18;RPS2;RPS9;RPS15;RPS28;RACK1;RPS23;RPS11;RPS14;RPS5;RPS21;RPS4X;RPS25;RPS15A;RPSA;RPS26;RPS27L;RPS8;RPS4Y1;RPS19;RPS6;RPS24;MRPS6	PVALBChC
705	WikiPathway_2023_Human__Oxidative Phosphorylation WP623	-0.561147	-3.47701	0	0	0	37/50	25.40%	NDUFV2;NDUFB8;NDUFC2;ATP5PO;ATP5MF;NDUFA2;ATP5MC1;NDUFS5;ATP5F1D;NDUFB10;NDUFA4;ATP5PF;ATP5MC3;NDUFA6;ATP6AP1;NDUFS3;ATP5ME;NDUFS8;NDUFS7;NDUFA11;NDUFB7;ATP5PD;ATP5F1E;ATP5F1B;NDUFB5;NDUFB9;NDUFAB1;NDUFV1;NDUFC1;NDUFA3;NDUFS6;NDUFB2;ATP5PB;ATP6AP2;NDUFB4;NDUFA8;NDUFS2	PVALBChC
706	GO_Cellular_Component_2023__Cytosolic Small Ribosomal Subunit (GO:0022627)	-0.603965	-3.42385	0	0	0	33/37	32.07%	RPS27;RPS17;FAU;RPS3A;RPS10;MRPS12;RPS27A;RPS16;UBA52;RPS13;RPS7;RPS18;RPS2;RPS9;RPS15;RPS28;RACK1;RPS23;RPS11;RPS14;RPS5;RPS21;RPS4X;RPS25;RPS15A;RPSA;RPS26;RPS27L;RPS8;RPS4Y1;RPS19;RPS6;RPS24	PVALBChC
707	KEGG_2021_Human__Prion disease	-0.370557	-3.38875	0	0	0	126/211	33.04%	NDUFV2;NDUFB8;SLC25A5;NDUFC2;CYC1;ATP5PO;COX7C;NDUFA2;ATP5MC1;UQCR10;COX6A1;PSMB4;NDUFA13;COX5B;NDUFS5;COX4I1;ATP5F1D;COX8A;NDUFB10;TUBA4A;COX6B1;PSMB6;HSPA8;MAPK12;NDUFA4;BAX;ATP5PF;ATP5MC3;TUBB2A;TUBA1B;NDUFA6;NDUFS3;COX7A1;TUBB4B;NDUFS8;NDUFB11;NDUFS7;GRIN2A;UQCRFS1;PPP3R2;UQCR11;PSMC4;TUBB3;ADRM1;NDUFA11;COX7B;NDUFB7;ATF4;ATP5PD;HSPA2;NDUFA1;HSPA5;CSNK2B;TUBA1A;PSMB5;PSMD8;ATP5F1E;COX7A2;CYCS…	PVALBChC
708	GO_Biological_Process_2023__Aerobic Respiration (GO:0009060)	-0.52455	-3.36528	0	0	0	39/56	26.67%	NDUFV2;NDUFB8;NDUFC2;SURF1;NDUFA2;NDUFA13;CHCHD10;NDUFS5;ATP5F1D;NDUFB10;NDUFA6;NDUFS3;NDUFS8;SLC25A51;NDUFB11;NDUFS7;NDUFA11;BLOC1S1;NDUFB7;NDUFA1;OXA1L;MTFR1L;MDH2;NDUFB5;NDUFB9;NDUFAB1;NDUFV1;NDUFC1;UQCRC1;NDUFA3;NDUFS6;NDUFB2;UQCRB;NDUFA12;NDUFB4;UQCRH;NDUFA8;NDUFS2;SIRT3	PVALBChC
709	GO_Biological_Process_2023__Gene Expression (GO:0010467)	-0.337756	-3.30947	0	0	0	148/265	32.63%	MRPL28;MRPL11;RPL8;MRPL12;TESC;MRPS17;DHPS;LMF2;GSPT2;MRPL55;EXOSC5;RPS27;RPL3;RPL7A;RPLP0;RPS17;FAU;RPL7;MRPL23;RPS3A;RPL27;DDX54;RPS10;MRPS12;RPL18A;MRPL34;MRPL36;RPS27A;MRPS7;RPL18;RPL9;RPS16;RPL38;RPL36;RPL21;RPL19;RPL41;RPS13;DNAJB11;EIF4A3;RPL29;MRPS18A;MRPS18B;RPS7;RPS18;RPL10A;STUB1;RPL36AL;EEF1A2;CASP8;RPL13;RPL10;MRPL43;THOC3;RPLP1;RPS2;RBPMS;RPL17;RPS9;RPLP2;MRPL51;RPS15;RPL23A;RPS6KB2…	PVALBChC
710	GO_Cellular_Component_2023__Mitochondrial Membrane (GO:0031966)	-0.304296	-3.26217	0	0	0	306/462	44.42%	TIMM10;MRPL54;MTLN;TIMM13;NDUFV2;NDUFB8;AIFM3;SLC25A5;MRPL17;NDUFC2;CYC1;MRPS28;MRPL28;ATP5PO;MRPL11;MICOS13;MRPL40;SLC25A1;COA3;AURKAIP1;MRPL12;MRPS17;ATP5MF;MRPS34;COX7C;NDUFA2;ATP5MC1;UQCR10;COX6A1;NDUFA13;IFI27L2;MRPL55;COX5B;NDUFAF3;VRK2;SLC25A11;GADD45GIP1;TIMM17B;NDUFS5;ENDOG;COX4I1;ATP5F1D;MRPL21;COX8A;NDUFB10;COX6B1;TMEM160;SHMT2;ATP5MK;TOMM22;MRPL23;UQCC3;BCS1L;COASY;NDUFA4;MRPS12;BAX;A…	PVALBChC
711	MSigDB_Hallmark_2020__Myc Targets V1	-0.355603	-3.17515	0	0	0	142/191	45.30%	CYC1;NHP2;NOP16;HSPE1;POLE3;IMPDH2;RPLP0;AIMP2;MRPL23;EEF1B2;RPS10;LDHA;PRDX4;TUFM;RPL18;RANBP1;SNRPD2;LSM7;PPIA;MRPS18B;RAN;SF3A1;CCT7;PSMC4;PCNA;RPS2;RACK1;PHB2;PSMD8;RUVBL2;COX5A;LSM2;RPS5;MRPL9;H2AZ1;PSMA7;CCNA2;SNRPG;C1QBP;NDUFAB1;COPS5;SET;NME1;VBP1;RRP9;EIF4A1;KPNA2;PSMB3;CDK4;SRSF2;CCT3;HSP90AB1;CCT5;PA2G4;PCBP1;RPL6;NCBP2;HDGF;PGK1;RPL14;ILF2;KARS1;IFRD1;RRM1;ODC1;TRIM28;PRPF31;EIF2S2;SR…	PVALBChC
712	KEGG_2021_Human__Diabetic cardiomyopathy	-0.369591	-3.13001	0	0	0	83/153	28.24%	NDUFV2;NDUFB8;SLC25A5;NDUFC2;CYC1;ATP5PO;COX7C;NDUFA2;ATP5MC1;UQCR10;COX6A1;NDUFA13;COX5B;NDUFS5;COX4I1;ATP5F1D;COX8A;NDUFB10;COX6B1;PDK2;GAPDH;MAPK12;NDUFA4;ATP5PF;ATP5MC3;RELA;NDUFA6;NDUFS3;COX7A1;NDUFS8;TGFB1;NDUFB11;NDUFS7;UQCRFS1;UQCR11;PDHB;CPT2;ATP2A1;NDUFA11;COX7B;NDUFB7;ATP5PD;NDUFA1;ATP5F1E;COX7A2;ATP5F1B;COX5A;CTSD;SLC2A1;PIK3R2;SLC25A4;NDUFB5;NDUFB9;UQCRQ;NDUFAB1;PPIF;COX6C;NDUFV1;CD3…	PVALBChC
713	GO_Biological_Process_2023__Mitochondrial Respiratory Chain Complex Assembly (GO:0033108)	-0.430841	-3.12948	0	0	0	67/86	41.62%	NDUFB8;NDUFC2;SURF1;SDHAF1;DMAC2;COA3;NDUFA2;NDUFA13;NDUFAF3;COX14;NDUFS5;NDUFB10;UQCC3;BCS1L;NDUFA6;NDUFS3;NDUFS8;NDUFB11;NDUFS7;SCO2;SDHAF2;UQCRFS1;PET100;NDUFA11;NDUFB7;NDUFA1;COX16;OXA1L;NDUFB5;NDUFB9;COA8;NDUFAF4;NDUFAB1;NDUFC1;NDUFA3;NDUFB2;TMEM126A;NDUFAF8;FOXRED1;AIFM1;NDUFB4;CHCHD4;TMEM223;NDUFA8;DMAC1;NDUFS2;COX17;COX20;NDUFB3;SAMM50;COA5;TAFAZZIN;NDUFA9;SDHAF4;CHCHD7;TMEM126B;NDUFB1;UQ…	PVALBChC
714	GO_Molecular_Function_2023__Transmembrane Receptor Protein Kinase Activity (GO:0019199)	0.557121	3.06624	0	0	0	14/26	9.64%	TGFBR2;BMPR1B;EGFR;MUSK;FLT1;AXL;KIT;ROR1;DDR2;MERTK;ROR2;MST1R;ERBB2;PDGFRA	PVALBChC
715	KEGG_2021_Human__Non-alcoholic fatty liver disease	-0.375442	-3.05933	0	0	0	70/131	25.83%	NDUFV2;NDUFB8;NDUFC2;CYC1;COX7C;NDUFA2;UQCR10;COX6A1;NDUFA13;COX5B;FOS;NDUFS5;COX4I1;COX8A;NDUFB10;COX6B1;MAPK12;NDUFA4;BAX;RELA;NDUFA6;NDUFS3;COX7A1;NDUFS8;CEBPA;TGFB1;NDUFB11;NDUFS7;UQCRFS1;UQCR11;CASP8;NDUFA11;COX7B;NDUFB7;ATF4;NDUFA1;JUN;COX7A2;CYCS;COX5A;DDIT3;PIK3R2;NDUFB5;NDUFB9;UQCRQ;NDUFAB1;COX6C;NDUFV1;NDUFC1;UQCRC1;NDUFA3;NDUFS6;NDUFB2;MLX;UQCRB;NDUFA12;PRKAG1;GSK3A;NDUFB4;ITCH;SDHA;UQ…	PVALBChC
716	GO_Cellular_Component_2023__Polysomal Ribosome (GO:0042788)	-0.613137	-3.05287	0	0	0	21/27	25.10%	RPL8;RPL7A;RPL18A;RPL18;RPL38;RPL36;RPL19;RPL41;RPL10A;RPL36AL;RPS28;RPS23;RPL39;RPS21;RPL24;RPL32;RPL30;RPL6;RPS26;RPL31;RPL11	PVALBChC
717	WikiPathway_2023_Human__Nonalcoholic Fatty Liver Disease WP4396	-0.379617	-3.05195	0	0	0	69/127	25.83%	NDUFV2;NDUFB8;NDUFC2;CYC1;COX7C;NDUFA2;UQCR10;COX6A1;NDUFA13;COX5B;NDUFS5;COX4I1;COX8A;NDUFB10;COX6B1;NDUFA4;BAX;RELA;NDUFA6;NDUFS3;COX7A1;NDUFS8;CEBPA;TGFB1;NDUFB11;NDUFS7;UQCRFS1;UQCR11;CASP8;NDUFA11;COX7B;NDUFB7;ATF4;NDUFA1;JUN;COX7A2;CYCS;COX5A;DDIT3;PIK3R2;NDUFB5;NDUFB9;UQCRQ;NDUFAB1;COX6C;NDUFV1;BBC3;NDUFC1;UQCRC1;NDUFA3;NDUFS6;NDUFB2;MLX;UQCRB;NDUFA12;PRKAG1;GSK3A;NDUFB4;ITCH;SDHA;UQCRH;XB…	PVALBChC
718	GO_Cellular_Component_2023__Mitochondrial Respiratory Chain Complex I (GO:0005747)	-0.523465	-3.05017	0	0	0	28/40	25.40%	NDUFV2;NDUFB8;NDUFC2;NDUFA2;NDUFA13;NDUFS5;NDUFB10;NDUFA4;NDUFA6;NDUFS3;NDUFS8;NDUFB11;NDUFS7;NDUFA11;NDUFB7;NDUFA1;NDUFB5;NDUFB9;NDUFAB1;NDUFV1;NDUFC1;NDUFA3;NDUFS6;NDUFB2;NDUFA12;NDUFB4;NDUFA8;NDUFS2	PVALBChC
719	GO_Cellular_Component_2023__Respiratory Chain Complex I (GO:0045271)	-0.523465	-3.05017	0	0	0	28/40	25.40%	NDUFV2;NDUFB8;NDUFC2;NDUFA2;NDUFA13;NDUFS5;NDUFB10;NDUFA4;NDUFA6;NDUFS3;NDUFS8;NDUFB11;NDUFS7;NDUFA11;NDUFB7;NDUFA1;NDUFB5;NDUFB9;NDUFAB1;NDUFV1;NDUFC1;NDUFA3;NDUFS6;NDUFB2;NDUFA12;NDUFB4;NDUFA8;NDUFS2	PVALBChC
720	GO_Biological_Process_2023__Mitochondrial Translation (GO:0032543)	-0.396929	-3.01021	0	0	0	80/94	49.95%	MRPL54;MRPL17;MRPS28;MRPL28;MRPL11;MRPL40;MRPL12;MRPS17;MRPS34;MRPL55;GADD45GIP1;MRPL21;MRPL23;MRPS12;MRPL34;MRPL36;TUFM;MRPS7;MRPL58;MRPL49;MRPS10;MRPS18A;MRPS18B;MRPS2;MRPL43;MRPL4;MRPL51;MRPL57;MRPL35;MRPL27;MRPL2;MRPL9;MRPL24;MRPL52;MRPS11;MRPL47;MRPL10;CHCHD1;MRPS26;MRPL18;MRPL41;MRPS18C;MRPL16;MRPL20;MRPL14;MTIF2;MRPL44;MRPL46;MRPS21;MRPS14;GATC;MRPS33;MRPL50;MRPS6;MTG1;MRPS5;MRPS15;MTIF3;M…	PVALBChC
721	GO_Biological_Process_2023__Ribonucleoprotein Complex Biogenesis (GO:0022613)	-0.367911	-2.98985	0	0	0	76/114	36.40%	NOP16;RPS27;RPS17;NIP7;RPL7;RPS3A;SNU13;UTP3;MRPS12;GRWD1;MRPL36;RPS16;RPL38;RPS13;RPS7;RPL26L1;TBL3;RPS9;RPS15;RPS19BP1;RPS28;EMG1;RPS23;RPS11;RPS14;RPS5;WDR74;PES1;RPL26;NOC2L;RPS4X;BOP1;RPS25;RRP9;UTP15;ZNF622;IGF2BP3;RPL35A;RPL5;TMA16;RPS15A;RSL24D1;SPATA5L1;SURF6;METTL17;RPL14;CINP;WDR46;ZNF658;RIOK2;RRP7A;RPL11;MPHOSPH10;RPS8;NOL6;EBNA1BP2;NGDN;PNO1;NOP14;FCF1;RBIS;NOM1;GTPBP4;RPS19;RPS6;RP…	PVALBChC
722	GO_Molecular_Function_2023__NADH Dehydrogenase (Ubiquinone) Activity (GO:0008137)	-0.548285	-2.9612	0	0	0	23/32	25.40%	NDUFV2;NDUFB8;NDUFC2;NDUFA2;NDUFS5;NDUFB10;NDUFA4;NDUFA6;NDUFS3;NDUFS8;NDUFS7;NDUFB7;NDUFB5;NDUFB9;NDUFV1;NDUFC1;NDUFA3;NDUFS6;NDUFB2;NDUFA12;NDUFB4;NDUFA8;NDUFS2	PVALBChC
723	GO_Molecular_Function_2023__NADH Dehydrogenase (Quinone) Activity (GO:0050136)	-0.538125	-2.91146	0	0	0	24/33	26.95%	NDUFV2;NDUFB8;NDUFC2;NDUFA2;NDUFS5;NDUFB10;NDUFA4;NDUFA6;NDUFS3;NDUFS8;NDUFS7;NDUFB7;NDUFB5;NDUFB9;NDUFV1;NDUFC1;NDUFA3;NDUFS6;NDUFB2;NDUFA12;NDUFB4;NDUFA8;NDUFS2;NQO1	PVALBChC
724	KEGG_2021_Human__Huntington disease	-0.30155	-2.91073	0	0	0	141/257	34.47%	NDUFV2;NDUFB8;SLC25A5;NDUFC2;CYC1;ATP5PO;COX7C;NDUFA2;ATP5MC1;UQCR10;COX6A1;PSMB4;NDUFA13;COX5B;AP2M1;BDNF;NDUFS5;COX4I1;ATP5F1D;COX8A;NDUFB10;TUBA4A;COX6B1;PSMB6;TP53;NDUFA4;BAX;ATP5PF;ATP5MC3;TUBB2A;TUBA1B;NDUFA6;NDUFS3;COX7A1;POLR2J;TUBB4B;AP2S1;NDUFS8;NDUFB11;NDUFS7;ATG101;UQCRFS1;DCTN3;POLR2G;UQCR11;PSMC4;CASP8;TUBB3;ADRM1;NDUFA11;COX7B;NDUFB7;ATP5PD;NDUFA1;POLR2I;TUBA1A;PSMB5;PSMD8;ATP5F1E;…	PVALBChC
725	GO_Biological_Process_2023__Mitochondrial Electron Transport, NADH To Ubiquinone (GO:0006120)	-0.530573	-2.89699	0	0	0	23/33	25.40%	NDUFV2;NDUFB8;NDUFC2;NDUFA2;NDUFS5;NDUFB10;NDUFA4;NDUFA6;NDUFS3;NDUFS8;NDUFS7;NDUFB7;NDUFB5;NDUFB9;NDUFAB1;NDUFV1;NDUFC1;NDUFA3;NDUFS6;NDUFB2;NDUFB4;NDUFA8;NDUFS2	PVALBChC
726	GO_Biological_Process_2023__Ribosome Biogenesis (GO:0042254)	-0.33696	-2.89227	0	0	0	91/145	36.40%	NOP16;EXOSC5;RPS27;RPS17;NIP7;RPL7;DDX49;RPS3A;RPL27;DDX54;SNU13;UTP3;MRPS12;GRWD1;MRPL36;RPS16;POP4;RPS13;NOB1;RPS7;RPL26L1;TBL3;RPS9;RPS15;RPS19BP1;RPS28;EMG1;RPS23;RPS11;LYAR;RPS14;RPS5;WDR74;PES1;RPL26;NOC2L;RPS4X;BOP1;RPS25;RRP9;UTP15;ZNF622;IGF2BP3;RPL35A;RPL5;TMA16;RPS15A;RSL24D1;EXOSC3;PIH1D1;SPATA5L1;DCAF13;WDR55;SURF6;NOP53;METTL17;RPL14;CINP;WDR46;ZNF658;RIOK2;SBDS;RRP7A;RPL11;MPHOSPH1…	PVALBChC
727	GO_Biological_Process_2023__Mitochondrial Gene Expression (GO:0140053)	-0.378111	-2.89016	0	0	0	84/98	51.74%	MRPL54;MRPL17;MRPS28;MRPL28;MRPL11;MRPL40;MRPL12;MRPS17;MRPS34;MRPL55;GADD45GIP1;MRPL21;MRPL23;POLRMT;MRPS12;MRPL34;MRPL36;MRPS7;MRPL58;MRPL49;MRPS10;MRPS18A;MRPS18B;MRPS2;MRPL43;MRPL4;MRPL51;MRPL57;TBRG4;MRPL35;MRPL27;MRPL2;MRPL9;MRPL24;MRPL52;MRPS11;MRPL47;MRPL10;CHCHD1;MRPS26;MRPL18;MRPL41;MRPS18C;MRPL16;MRPL20;MRPL14;MRPL44;MRPL46;MRPS21;MRPS14;MTERF3;GATC;MRPS33;TFB2M;MRPL50;MRPS6;MTG1;MRPS5…	PVALBChC
728	KEGG_2021_Human__Alzheimer disease	-0.294341	-2.8838	0	0	0	148/286	33.31%	NDUFV2;NDUFB8;PSENEN;SLC25A5;NDUFC2;CYC1;ATP5PO;COX7C;NDUFA2;ATP5MC1;UQCR10;COX6A1;PSMB4;NDUFA13;COX5B;CDK5;FZD8;NDUFS5;COX4I1;ATP5F1D;APOE;DVL2;COX8A;NDUFB10;TUBA4A;ARAF;COX6B1;PSMB6;BACE2;GAPDH;HSD17B10;NDUFA4;ATP5PF;ATP5MC3;RELA;TUBB2A;TUBA1B;NDUFA6;NDUFS3;COX7A1;TUBB4B;NDUFS8;NDUFB11;DKK2;NDUFS7;GRIN2A;ATG101;UQCRFS1;PPP3R2;UQCR11;PSMC4;CASP8;TUBB3;ATP2A1;ADRM1;NDUFA11;CALM2;COX7B;NDUFB7;HRAS…	PVALBChC
729	WikiPathway_2023_Human__Mitochondrial Complex I Assembly Model OXPHOS System WP4324	-0.465434	-2.85848	0	0	0	30/49	25.40%	NDUFV2;NDUFB8;NDUFC2;DMAC2;NDUFA2;NDUFA13;NDUFAF3;NDUFS5;NDUFB10;NDUFA6;NDUFS3;NDUFB11;NDUFB7;NDUFA1;NDUFB5;NDUFB9;NDUFAF4;NDUFAB1;TMEM70;NDUFV1;NDUFC1;NDUFA3;NDUFS6;NDUFB2;NDUFA12;FOXRED1;NDUFB4;NDUFA8;DMAC1;NDUFS2	PVALBChC
730	GO_Biological_Process_2023__Ribosomal Small Subunit Biogenesis (GO:0042274)	-0.387854	-2.84828	0	0	0	55/80	36.40%	RPS27;RPS17;RPS3A;SNU13;UTP3;MRPS12;MRPS7;RPS16;RPS13;NOB1;RPS7;TBL3;TSR3;RPS9;RPS15;RPS19BP1;RPS28;EMG1;RPS23;RPS11;ERAL1;RPS14;RPS5;RPS4X;RPS25;RRP9;UTP15;IGF2BP3;RPS15A;MRPS11;RPSA;SURF6;METTL17;WDR46;RIOK2;RRP7A;MPHOSPH10;LSM6;RPS27L;RPS8;NOL6;NGDN;PNO1;NOP14;FCF1;NOM1;RPS19;RPS6;RPS24;DNTTIP2;RRP36;RIOK1;UTP6;EXOSC10;UTP11	PVALBChC
731	GO_Cellular_Component_2023__Mitochondrial Proton-Transporting ATP Synthase Complex (GO:0005753)	-0.694442	-2.84343	0	0	0	12/16	11.94%	ATP5PO;ATP5MF;ATP5MC1;ATP5F1D;ATP5MK;ATP5PF;ATP5MC3;ATP5ME;ATP5MJ;ATP5PD;ATP5F1E;ATP5F1B	PVALBChC
732	GO_Cellular_Component_2023__Proton-Transporting ATP Synthase Complex (GO:0045259)	-0.694442	-2.84343	0	0	0	12/16	11.94%	ATP5PO;ATP5MF;ATP5MC1;ATP5F1D;ATP5MK;ATP5PF;ATP5MC3;ATP5ME;ATP5MJ;ATP5PD;ATP5F1E;ATP5F1B	PVALBChC
733	GO_Biological_Process_2023__Energy Derivation By Oxidation Of Organic Compounds (GO:0015980)	-0.517652	-2.84135	0	0	0	24/36	24.18%	MTLN;CYC1;COX7C;NR4A3;UQCR10;COX6A1;COX5B;COX4I1;COX8A;COX6B1;NDUFA4;UQCR11;COX7B;COX7A2;CYCS;COX5A;CHCHD5;UQCRQ;COX6C;MT3;UQCRC1;UQCRB;UQCRH;COX15	PVALBChC
734	GO_Biological_Process_2023__Mitochondrial Respiratory Chain Complex I Assembly (GO:0032981)	-0.452791	-2.8165	0	0	0	32/53	25.40%	NDUFB8;NDUFC2;DMAC2;NDUFA2;NDUFA13;NDUFAF3;NDUFS5;NDUFB10;BCS1L;NDUFA6;NDUFS3;NDUFS8;NDUFB11;NDUFS7;NDUFA11;NDUFB7;NDUFA1;OXA1L;NDUFB5;NDUFB9;NDUFAF4;NDUFAB1;NDUFC1;NDUFA3;NDUFB2;TMEM126A;NDUFAF8;FOXRED1;NDUFB4;NDUFA8;DMAC1;NDUFS2	PVALBChC
735	GO_Biological_Process_2023__NADH Dehydrogenase Complex Assembly (GO:0010257)	-0.452791	-2.8165	0	0	0	32/53	25.40%	NDUFB8;NDUFC2;DMAC2;NDUFA2;NDUFA13;NDUFAF3;NDUFS5;NDUFB10;BCS1L;NDUFA6;NDUFS3;NDUFS8;NDUFB11;NDUFS7;NDUFA11;NDUFB7;NDUFA1;OXA1L;NDUFB5;NDUFB9;NDUFAF4;NDUFAB1;NDUFC1;NDUFA3;NDUFB2;TMEM126A;NDUFAF8;FOXRED1;NDUFB4;NDUFA8;DMAC1;NDUFS2	PVALBChC
736	KEGG_2021_Human__Amyotrophic lateral sclerosis	-0.282375	-2.76568	0	0	0	163/307	34.62%	NDUFV2;NDUFB8;NDUFC2;CYC1;ATP5PO;COX7C;NDUFA2;ATP5MC1;UQCR10;COX6A1;PSMB4;NDUFA13;COX5B;CHCHD10;NDUFS5;COX4I1;ATP5F1D;COX8A;NDUFB10;TUBA4A;PFN1;COX6B1;PSMB6;TP53;MAPK12;NDUFA4;BAX;ATP5PF;ATP5MC3;TUBB2A;TUBA1B;NDUFA6;NDUFS3;COX7A1;TUBB4B;NDUFS8;NDUFB11;NDUFS7;GRIN2A;ATG101;UQCRFS1;DCTN3;PPP3R2;UQCR11;PSMC4;TUBB3;ADRM1;NDUFA11;COX7B;GABARAP;NDUFB7;ATF4;ATP5PD;NDUFA1;HSPA5;CAT;TOMM40L;TUBA1A;PSMB5;P…	PVALBChC
737	KEGG_2021_Human__Thermogenesis	-0.306482	-2.72347	0	1.70982e-05	0.001	87/194	25.40%	NDUFV2;NDUFB8;NDUFC2;CYC1;ATP5PO;COA3;ATP5MF;COX7C;NDUFA2;ATP5MC1;UQCR10;COX6A1;NDUFA13;COX5B;NDUFAF3;COX14;NDUFS5;COX4I1;ATP5F1D;COX8A;NDUFB10;AKT1S1;COX6B1;RPS6KA1;MAPK12;NDUFA4;ATP5PF;ATP5MC3;NDUFA6;NDUFS3;COX7A1;ATP5ME;NDUFS8;NDUFB11;NDUFS7;UQCRFS1;UQCR11;CPT2;NDUFA11;COX7B;NDUFB7;HRAS;ATP5PD;NDUFA1;RPS6KB2;ATP5F1E;COX7A2;ATP5F1B;COX5A;ACTL6A;MLST8;CREB3;COX16;COA4;SLC25A20;NDUFB5;NDUFB9;NDUF…	PVALBChC
738	WikiPathway_2023_Human__Mitochondrial Complex IV Assembly WP4922	-0.525303	-2.70342	0	1.67982e-05	0.001	17/29	15.51%	SURF1;COA3;COX7C;COX6A1;COX5B;COX14;COX4I1;COX8A;COX6B1;NDUFA4;HIGD1A;PET100;COX7B;COX7A2;COX5A;COX16;COX6C	PVALBChC
739	KEGG_2021_Human__Pathways of neurodegeneration	-0.262296	-2.70048	0	1.65086e-05	0.001	187/377	33.65%	NDUFV2;NDUFB8;SLC25A5;NDUFC2;CYC1;ATP5PO;COX7C;NDUFA2;ATP5MC1;UQCR10;COX6A1;PSMB4;NDUFA13;COX5B;CDK5;BDNF;FZD8;NDUFS5;COX4I1;ATP5F1D;DVL2;COX8A;NDUFB10;TUBA4A;ARAF;COX6B1;PSMB6;MAPK12;HSD17B10;NDUFA4;BAX;ATP5PF;ATP5MC3;RELA;TUBB2A;TUBA1B;NDUFA6;RPS27A;NDUFS3;COX7A1;TUBB4B;NDUFS8;UBA52;NDUFB11;DKK2;NDUFS7;GRIN2A;ATG101;GPR37;UQCRFS1;DCTN3;PPP3R2;UQCR11;PSMC4;CASP8;TUBB3;ATP2A1;ADRM1;NDUFA11;CALM2;…	PVALBChC
740	GO_Biological_Process_2023__Cilium Movement (GO:0003341)	0.407309	2.68666	0	0.00863276	0.015	25/39	24.92%	SPAG17;RSPH6A;PIERCE2;CFAP53;TTC29;TEKT5;DNAH11;DNAAF4;ODAD4;CFAP61;HYDIN;TEKT3;CFAP91;CFAP70;TTLL3;CABYR;RSPH4A;CCDC40;CFAP54;DNAH5;CAMSAP3;DNAI1;NME5;GAS8;DNHD1	PVALBChC
741	GO_Molecular_Function_2023__RNA Endonuclease Activity, Producing 5'-Phosphomonoesters (GO:0016891)	-0.545634	-2.66041	0	8.11439e-05	0.005	20/25	32.40%	POP7;NUDT16;ELAC1;POP4;FEN1;RPP25;POP5;DBR1;PRORP;NUDT12;NUDT16L1;RPP40;RNASEH1;MRPL44;ELAC2;PLD6;APEX1;ENDOV;RPP14;RPP38	PVALBChC
742	GO_Biological_Process_2023__ncRNA Processing (GO:0034470)	-0.348911	-2.65702	0	9.57498e-05	0.006	54/92	32.13%	TSEN34;POP7;EXOSC5;RPS27;RPS17;RPL7;DDX49;RPL27;DDX54;INTS5;RPS16;POP4;NOB1;RPS7;RPS15;RPS28;EMG1;THG1L;LYAR;WDR74;PES1;RPL26;RPS25;RRP9;UTP15;IGF2BP3;RPL35A;RPL5;EXOSC3;PIH1D1;TSEN54;DCAF13;WDR55;NOP53;RPL14;KARS1;SBDS;RRP7A;RPL11;WDR18;INTS1;NOL6;EBNA1BP2;NOP14;INTS11;INTS13;ADAT1;NOLC1;RPS19;DKC1;INTS3;RPS6;RPS24;EXOSC2	PVALBChC
743	GO_Molecular_Function_2023__Transmembrane Receptor Protein Tyrosine Kinase Activity (GO:0004714)	0.422848	2.62188	0	0.0115103	0.027	17/36	13.51%	FGFR3;EFEMP1;EGFR;MUSK;FLT1;AXL;KIT;ROR1;FGFR2;DDR2;MERTK;ROR2;MST1R;ERBB2;PDGFRA;NELL2;CRIM1	PVALBChC
744	GO_Biological_Process_2023__rRNA Metabolic Process (GO:0016072)	-0.355465	-2.58281	0	0.000172664	0.01	53/80	37.64%	EXOSC5;RPS27;RPS17;RPL7;DDX49;RPL27;DDX54;RPS16;POP4;NOB1;POLR1G;RPS7;RPS15;RPS28;EMG1;TRIR;DEDD2;LYAR;WDR74;PES1;RPL26;RPS25;RRP9;UTP15;IGF2BP3;RPL35A;RPL5;EXOSC3;PIH1D1;DCAF13;WDR55;NOP53;RPL14;SIRT7;SBDS;RRP7A;RPL11;WDR18;NOL6;EBNA1BP2;NOP14;NOLC1;RPS19;DKC1;RPS6;RPS24;EXOSC2;NIFK;RRP36;EXOSC10;GTF3A;DDX27;SPPL2B	PVALBChC
745	GO_Biological_Process_2023__Ribosome Assembly (GO:0042255)	-0.445596	-2.55992	0	0.000216209	0.013	29/41	31.40%	RPS27;RPLP0;MRPS7;MRPS2;RPL10;EIF6;RPS15;RPL23A;RPS28;PPAN;ERAL1;RPS14;RPS5;TRAF7;C1QBP;RPL5;MRPS11;RPSA;RPL6;NOP53;MRPL20;NGRN;SBDS;RRP7A;RPL11;RPS27L;MTERF3;NOA1;RPS19	PVALBChC
746	GO_Biological_Process_2023__ATP Biosynthetic Process (GO:0006754)	-0.541194	-2.53128	0	0.000349563	0.02	13/23	11.94%	ATP5PO;ATP5MF;ATP5MC1;ATP5F1D;ATP5MK;ATP5PF;ATP5MC3;ATP5ME;TGFB1;ATP5MJ;ATP5PD;ATP5F1E;ATP5F1B	PVALBChC
747	GO_Biological_Process_2023__Calcium Ion Import Across Plasma Membrane (GO:0098703)	0.455933	2.52133	0	0.022661	0.069	23/26	41.00%	CACNA1I;SCN11A;CACNA1E;CACNA2D1;SCN5A;SLC24A1;TRPV1;SLC24A2;SLC8A2;SCN7A;SLC8A1;CACNA1G;CLU;SCN3A;CACNA1C;CACNA1B;CACNA1A;NALF1;SCN2A;SCN1A;SCN8A;CACNA1D;SLC8A3	PVALBChC
748	GO_Biological_Process_2023__Sensory Perception Of Light Stimulus (GO:0050953)	0.372216	2.49993	0	0.0224452	0.087	17/42	12.90%	EYA4;EFEMP1;WFS1;BEST1;WHRN;PDE6C;DHRS3;CRYZ;ADGRV1;KIFC3;SLC24A1;NXNL2;CRYBG3;GUCA1B;USH2A;PCDH15;POU6F2	PVALBChC
749	MSigDB_Hallmark_2020__DNA Repair	-0.304371	-2.4839	0	0.000598436	0.037	86/134	39.36%	GUK1;SURF1;MRPL40;APRT;GPX4;NT5C;IMPDH2;TP53;POLR2J;EIF1B;FEN1;GMPR2;SAC3D1;AAAS;POLR2G;PCNA;ADRM1;POLR3GL;POLR2I;EDF1;CETN2;VPS37D;NUDT21;BRF2;NME3;SSRP1;VPS28;AK1;MPG;NME1;GTF2A2;TMED2;RFC5;SNAPC5;POLR2H;NELFE;TAF13;TAF1C;CMPK2;ELL;ITPA;PRIM1;RAE1;NCBP2;DAD1;POLR2K;TAF12;RPA3;SUPT5H;POLR2E;PDE4B;TAF10;GTF2F1;ERCC2;MPC2;NELFCD;POLR2C;NELFB;ADA;COX17;ERCC5;RFC4;TAF6;BCAP31;ERCC4;ERCC1;TAF9;SF3A3;…	PVALBChC
750	MSigDB_Hallmark_2020__UV Response Up	-0.300024	-2.45596	0	0.000765998	0.048	88/124	44.82%	CA2;ATP6V1F;SELENOW;CCK;FOS;POLE3;TUBA4A;UROD;MRPL23;CDC34;NPTX2;JUNB;AP2S1;TAP1;ALAS1;MAOA;FEN1;H2AX;CHRNA5;ENO2;HSPA2;LYN;SLC25A4;NFKBIA;BTG2;CNP;CDO1;GRPEL1;PLCL1;PPIF;FURIN;SIGMAR1;CYB5R1;POLR2H;RPN1;FKBP4;PRKCD;RXRB;NR4A1;WIZ;KLHDC3;GRINA;GGH;PSMC3;YKT6;GCH1;PDAP1;CEBPG;CASP3;ACAA1;ABCB1;SLC6A8;DNAJA1;PPT1;TYRO3;RFC4;MAPK8IP2;CLTB;CLCN2;PPAT;RET;DLG4;DGAT1;ARRB2;RASGRP1;ALDOA;PARP2;LHX2;CHKA…	PVALBChC
751	KEGG_2021_Human__Neuroactive ligand-receptor interaction	0.254925	2.44912	0	0.0291355	0.138	37/120	11.15%	ADRA1A;EDNRB;ADORA1;GABRG1;GNRHR;C5AR1;GABRB1;CHRNE;HRH1;AGT;GRIK3;P2RY11;GABRA3;GRIN2C;MC1R;CRHR1;SSTR2;GRIK4;HTR7;PTAFR;GPR83;GRM7;NPW;PTH2R;OPRM1;HTR4;GABRA4;PYY;GRM4;LEPR;P2RX4;CCKBR;NMBR;TRPV1;P2RX6;HTR5A;ADRA1D	PVALBChC
752	GO_Cellular_Component_2023__Collagen-Containing Extracellular Matrix (GO:0062023)	0.236949	2.44465	0	0.0262066	0.144	67/175	18.40%	COL4A4;ABI3BP;EFEMP1;ADAMTS10;TNXB;VWF;ITIH2;ACAN;FBLN5;AGT;ANGPT1;LTBP1;CBLN4;OGN;COL19A1;SERPINF1;ANGPTL4;COL11A2;COL14A1;GREM1;IGFBP7;SPON1;LOXL2;LTBP4;LAMA1;HMCN2;FGFR2;NRG1;TGFB3;PXDN;VCAN;COL27A1;COL9A1;SERPINE2;ITIH5;EGFL7;ANGPTL2;COL23A1;COL4A3;COL6A1;COL6A6;CDH13;ZP3;COL7A1;PCOLCE;SERPING1;USH2A;LAMA4;A2M;ANXA4;COL5A2;TNR;THBS3;COL5A1;PCSK6;COL25A1;WNT5B;FN1;TIMP2;SMOC1;P3H2;ANXA11;BCAT2…	PVALBChC
753	GO_Biological_Process_2023__Positive Regulation Of Epithelial To Mesenchymal Transition (GO:0010718)	0.422	2.42838	0	0.0263029	0.162	14/29	15.62%	TGFBR2;NOTCH1;TNXB;RGCC;AGT;GLIPR2;SMAD3;LOXL2;TGFB3;WWTR1;BCL9L;EZH2;BMP2;TCF7L2	PVALBChC
754	GO_Biological_Process_2023__rRNA Processing (GO:0006364)	-0.317095	-2.42152	0	0.00107356	0.069	53/95	32.13%	NHP2;EXOSC5;RPS27;RPS17;RPL7;DDX49;RPL27;DDX54;SNU13;RPS16;POP4;NOB1;RPS7;EIF6;TSR3;RPS15;RPS28;MAK16;EMG1;LYAR;RPS14;WDR74;PES1;RPL26;RPS25;RRP9;UTP15;IGF2BP3;RPL35A;RPL5;EXOSC3;PIH1D1;DCAF13;WDR55;NOP53;RPL14;RIOK2;SBDS;RRP7A;RPL11;MPHOSPH10;WDR18;LSM6;NOL6;SART1;EBNA1BP2;NOP14;NOLC1;RPS19;DKC1;RPS6;RPS24;EXOSC2	PVALBChC
755	GO_Biological_Process_2023__Sensory Perception Of Sound (GO:0007605)	0.329542	2.41044	0	0.0268575	0.187	21/55	11.90%	TBL1X;SLC26A4;WFS1;CDC14A;WHRN;DCDC2;KIT;SNAI2;COL11A2;ROR1;CLIC5;ATP6V0A4;LRP2;GRM7;COL4A3;EYA1;ZNF354A;MYO3B;RIPOR2;USH2A;PCDH15	PVALBChC
756	GO_Biological_Process_2023__Sensory Perception Of Mechanical Stimulus (GO:0050954)	0.334158	2.39076	0	0.0289197	0.214	21/54	11.90%	TBL1X;SLC26A4;WFS1;CDC14A;WHRN;DCDC2;SNAI2;COL11A2;ROR1;CLIC5;ATP6V0A4;LRP2;GRM7;COL4A3;EYA1;ZNF354A;P2RX4;MYO3B;RIPOR2;USH2A;PCDH15	PVALBChC
757	GO_Biological_Process_2023__Ventricular Septum Morphogenesis (GO:0060412)	0.456739	2.38978	0	0.0263888	0.214	10/22	9.45%	TGFBR2;TGFBR3;HEY1;NOTCH1;SOX4;SLIT1;ROBO1;SOX11;SMAD7;ZFPM2	PVALBChC
758	GO_Biological_Process_2023__Negative Regulation Of Apoptotic Signaling Pathway (GO:2001234)	-0.336104	-2.38545	0	0.0019007	0.122	40/70	31.81%	SLC25A5;PRELID1;QARS1;NDUFA13;NR4A2;BDNF;NOL3;RELA;NDUFS3;GSTP1;TMBIM1;MPV17L;LGALS3;HSPA1A;PARK7;SLC25A4;MAZ;PPIF;FXN;NOC2L;AKR1B1;PIH1D1;MEN1;TMEM14A;BMP4;IGF1;GRINA;PSMD10;PINK1;PSME3;HERPUD1;SH3RF1;SLC35F6;BCL2;CX3CL1;GHITM;MAPK8IP2;SRC;AKT1;PELI3	PVALBChC
759	WikiPathway_2023_Human__Splicing Factor NOVA Regulated Synaptic Proteins WP4148	0.35862	2.38507	0	0.0253587	0.223	36/38	56.78%	CHL1;MAPK4;NCDN;KCNQ2;GRIK2;PLCB4;GRIN1;EPB41;CADM1;STX2;EPB41L1;GABRG2;ANK3;CDH2;PRKCZ;NEO1;KCNJ6;DAB1;CASK;EPB41L3;GABBR2;KCNMA1;CLASP1;GPHN;GRIN2B;ATP2B1;MAPK9;MAP4;CAMK2G;SNW1;CLSTN1;CADM3;EFNA5;TERF2IP;RAP1GAP;EPB41L2	PVALBChC
760	GO_Cellular_Component_2023__Small-Subunit Processome (GO:0032040)	-0.344061	-2.37807	0	0.00201356	0.13	44/68	37.64%	RPS27;RPS17;RPS3A;SNU13;UTP3;MRPS12;RPS27A;RPS16;RPS13;RPS7;TBL3;RPS9;RPS19BP1;RPS28;FBLL1;EMG1;RPS23;RPS11;RPS14;RPS5;RPS4X;RRP9;UTP15;IGF2BP3;RPS15A;DCAF13;WDR46;RRP7A;MPHOSPH10;RPS8;NOL6;NGDN;PNO1;NOP14;FCF1;UTP14A;RPS19;RPS6;RPS24;DNTTIP2;UTP6;EXOSC10;UTP11;SPPL2B	PVALBChC
761	MSigDB_Hallmark_2020__Myc Targets V2	-0.381805	-2.36215	0	0.00241456	0.153	33/47	37.03%	NOP16;EXOSC5;HSPE1;AIMP2;NIP7;DCTPP1;GRWD1;IMP4;SLC29A2;TBRG4;PPAN;WDR74;NDUFAF4;PES1;UNG;MYBBP1A;PPRC1;RRP9;CDK4;PA2G4;FARSA;MPHOSPH10;MCM4;GNL3;SORD;TFB2M;TMEM97;NOLC1;SRM;TCOF1;DDX18;CBX3;PUS1	PVALBChC
762	GO_Biological_Process_2023__Ribosomal Large Subunit Biogenesis (GO:0042273)	-0.378595	-2.35166	0	0.00283146	0.176	28/50	25.10%	NOP16;RPLP0;NIP7;RPL7;RPL26L1;RPL10;EIF6;RPL23A;MAK16;PPAN;WDR74;TRAF7;PES1;RPL26;NOC2L;ZNF622;RPL35A;RPL5;TMA16;RSL24D1;SPATA5L1;RPL6;SURF6;NOP53;RPL14;CINP;MRPL20;RPL11	PVALBChC
763	KEGG_2021_Human__Cytokine-cytokine receptor interaction	0.317738	2.34906	0	0.0320408	0.293	29/59	21.95%	TGFBR2;IL4R;BMPR1B;EDA;NGF;IL17RA;ACVR1C;INHBB;TGFB3;IL20RB;FAS;CXCL13;IL10RB;LEPR;TNFSF4;AMH;IL17RC;BMP2;TNFRSF19;CNTFR;IL17D;IL1RAP;IL16;IL34;GDF11;IL15RA;IFNAR2;ACVR2B;IFNAR1	PVALBChC
764	GO_Biological_Process_2023__Mitochondrion Organization (GO:0007005)	-0.274694	-2.32388	0	0.00387045	0.223	68/139	32.04%	TIMM10;TIMM13;RAB5IF;AIP;HIGD2A;CHCHD10;FMC1;TIMM17B;ATP5F1D;MYH7B;TOMM22;BCS1L;HSD17B10;BAX;COX7A1;HIGD1A;FIS1;HAX1;ATP2A1;MGARP;STOML2;TIMM8B;CHCHD2;PHB2;THG1L;COX7A2;TMEM11;PYROXD2;GBA1;OXA1L;TOMM7;MTFR1L;PARK7;SLC25A4;PHB1;TMEM70;RHOT2;TIMM17A;TOMM20;AIFM1;TIMM50;TOMM40;CHCHD4;ATAD3B;TOMM34;PINK1;ATP7A;MIEF1;CLUH;IFIT2;MUL1;WDR81;ATP23;RAB29;BCAP31;SAMM50;COX7A2L;PLD6;MIGA2;NOA1;MTX3;APEX1;PR…	PVALBChC
765	KEGG_2021_Human__ECM-receptor interaction	0.318309	2.31727	0	0.0360726	0.338	23/54	15.32%	COL4A4;ITGB8;ITGB4;TNXB;VWF;SDC4;SPP1;ITGA10;ITGA6;LAMB4;LAMA1;COL9A1;COL4A3;COL6A1;COL6A6;SV2C;ITGA7;LAMA4;TNR;THBS3;ITGA3;ITGA1;FN1	PVALBChC
766	GO_Cellular_Component_2023__Mitochondrial Intermembrane Space (GO:0005758)	-0.354321	-2.31586	0	0.00405607	0.237	30/55	27.86%	TIMM10;TIMM13;PRELID1;CHCHD10;ARL2;HAX1;BLOC1S1;NDUFB7;TIMM8A;HTRA2;STOML2;TIMM8B;CHCHD2;CYCS;COA4;CHCHD5;ARL2BP;SOD1;COA7;DIABLO;AIFM1;CHCHD4;CPOX;PINK1;REXO2;NDUFA8;COA6;TIMM10B;COX17;GATM	PVALBChC
767	GO_Biological_Process_2023__Visual Perception (GO:0007601)	0.347086	2.30698	0	0.0366892	0.359	18/41	18.33%	EYA4;EFEMP1;WFS1;BEST1;PDE6C;DHRS3;CRYZ;ADGRV1;KIFC3;SLC24A1;NXNL2;CRYBG3;EYS;GUCA1B;POU6F2;CEP250;CRYGS;BBS2	PVALBChC
768	GO_Molecular_Function_2023__Active Monoatomic Ion Transmembrane Transporter Activity (GO:0022853)	-0.53344	-2.30036	0	0.00477437	0.275	13/18	23.32%	COX7C;UQCR10;COX5B;COX4I1;COX8A;COX6B1;COX7A1;SLC47A1;COX7B;COX5A;UQCRC1;UQCRB;UQCRH	PVALBChC
769	WikiPathway_2023_Human__Proteasome Degradation WP183	-0.36738	-2.29514	0	0.00485219	0.282	43/53	47.87%	UCHL3;PSMB4;PSMB6;H2AX;PSMC4;PSME2;PSMB5;PSME1;PSMD8;PSMC5;HLA-C;UBC;H2AZ1;PSMA7;UBB;PSMB3;RPN1;HLA-A;PSMD2;PSMC3;PSMD10;PSME3;PSMD13;PSMD4;PSMA1;PSMA6;PSMA4;UCHL1;PSMA5;PSMD7;PSMD3;PSMC1;PSMB1;UBE2D1;UBA1;PSMB7;PSMA3;PSMC6;PSMC2;PSMB2;PSMD12;RPN2;PSMD6	PVALBChC
770	GO_Molecular_Function_2023__rRNA Binding (GO:0019843)	-0.391525	-2.28128	0	0.00547689	0.313	23/41	25.10%	MRPL11;RPLP0;MRPS7;RPS13;MRPS18A;RPL17;RPS9;EMG1;PPAN;ERAL1;RPS14;RPS5;RPL5;MRPS11;MRPL18;RPL12;MRPS18C;NOP53;CIRBP;MRPL16;NGRN;SBDS;RPL11	PVALBChC
771	GO_Molecular_Function_2023__Transmitter-Gated Monoatomic Ion Channel Activity (GO:0022824)	0.375694	2.28094	0	0.0414102	0.423	25/31	40.85%	GABRG1;GABRB1;CHRNE;GRIK3;GABRA3;GRIN2C;GRIK4;GABRA4;GRIK1;GABRA6;GABRA2;GRIK2;GRIN2D;GRIN3A;GRIK5;GABRG2;GRIA1;GRIA3;GRIA4;GABRB3;GRIA2;GABRB2;GRIN2B;GRID1;GABRG3	PVALBChC
772	GO_Molecular_Function_2023__Hormone Activity (GO:0005179)	-0.476079	-2.27172	0	0.00569459	0.327	12/23	12.02%	VGF;CRH;SST;POMC;UCN;CCK;VIP;NPPC;INSL6;GNRH1;METRN;CHGB	PVALBChC
773	GO_Molecular_Function_2023__Proton Transmembrane Transporter Activity (GO:0015078)	-0.415312	-2.26721	0	0.00591908	0.34	19/33	24.18%	ATP6V1F;COX7C;UQCR10;COX5B;COX4I1;COX8A;COX6B1;SLC46A1;MFSD3;COX7A1;SLC47A1;COX7B;COX5A;SLC32A1;UQCRC1;UCP3;UQCRB;UQCRH;COX15	PVALBChC
774	GO_Cellular_Component_2023__Mitochondrial Ribosome (GO:0005761)	-0.481694	-2.26169	0	0.00621146	0.36	18/21	41.93%	MRPL28;MRPL40;MRPS12;MRPL34;MRPL49;MRPL43;MRPL51;MRPL57;MRPL35;MRPL9;MRPL18;MRPL20;MRPL14;MRPS14;MTG1;MRPL37;MTG2;MRPL13	PVALBChC
775	WikiPathway_2023_Human__Translation Factors WP107	-0.371989	-2.26165	0	0.00615708	0.361	40/47	51.50%	GSPT2;EIF5A;EEF1B2;EIF3G;EIF1;EIF2B4;EEF1A2;EIF6;EIF4A1;EIF1AY;EIF3I;EIF4A2;EIF2B2;EIF2B5;EIF3C;EIF2S2;EEF2;CLUH;EIF3D;EIF4G1;EEF1A1;EIF2B1;EIF1AX;EIF2AK1;EIF4EBP2;EIF2S3;EIF3F;ETF1;EIF3B;EIF3J;EIF4H;EIF3H;PAIP1;EIF5;EIF4B;EIF4E;PABPC1;EIF3E;EIF3A;EIF2AK2	PVALBChC
776	GO_Biological_Process_2023__Ventricular Septum Development (GO:0003281)	0.412676	2.2601	0	0.0450681	0.476	10/25	9.45%	TGFBR2;TGFBR3;HEY1;NOTCH1;SOX4;SLIT1;ROBO1;SOX11;SMAD7;ZFPM2	PVALBChC
777	GO_Biological_Process_2023__Axoneme Assembly (GO:0035082)	0.399136	2.24735	0	0.0468207	0.502	14/28	16.05%	SPAG17;RSPH6A;PIERCE2;LRRC43;RSPH1;HYDIN;CFAP74;LRGUK;CFAP91;STK36;TTLL3;DNAAF10;RSPH4A;CCDC40	PVALBChC
778	GO_Molecular_Function_2023__Copper Ion Binding (GO:0005507)	-0.432366	-2.23512	0	0.00805495	0.457	21/29	34.09%	CUTA;TP53;SNCG;RNF7;LACC1;SCO2;S100A13;DCT;PARK7;SOD1;SNCA;MT3;AOC3;ATP7A;SNCB;COA6;COX17;CCS;CUTC;GPC1;ATOX1	PVALBChC
779	GO_Molecular_Function_2023__Ionotropic Glutamate Receptor Activity (GO:0004970)	0.514427	2.23225	0	0.049184	0.538	10/15	27.01%	GRIK3;GRIN2C;GRIK4;PTK2B;GRIK1;GRIK2;GRIN1;GRIN2D;GRIN3A;GRIK5	PVALBChC
780	GO_Molecular_Function_2023__Translation Initiation Factor Activity (GO:0003743)	-0.386274	-2.23103	0	0.00814464	0.465	32/40	46.52%	EIF3G;EIF1;EIF1B;EIF2B4;EIF6;EIF4E1B;COPS5;EIF4A1;EIF1AY;EIF3I;EIF4A2;EIF2B2;MTIF2;EIF2B5;EIF3C;EIF2S2;EIF3K;EIF3D;EIF4G1;EIF2B1;EIF1AX;MTIF3;EIF2S3;EIF3F;EIF4E2;EIF3B;EIF4G2;EIF3J;EIF3H;EIF5;EIF4E;EIF3M	PVALBChC
781	GO_Molecular_Function_2023__G Protein-Coupled Peptide Receptor Activity (GO:0008528)	0.446516	2.21902	0	0.0510412	0.569	11/20	13.74%	NPSR1;NPR3;EDNRB;MC1R;CRHR1;SORCS3;GPR83;PTH2R;CCKBR;NMBR;SORCS1	PVALBChC
782	WikiPathway_2023_Human__Mitochondrial Complex III Assembly WP4921	-0.557454	-2.21882	0.00165017	0.00885102	0.494	10/15	23.32%	CYC1;UQCR10;UQCC3;BCS1L;UQCRFS1;UQCR11;UQCRQ;UQCRC1;UQCRB;UQCRH	PVALBChC
783	GO_Biological_Process_2023__Protein Targeting To Mitochondrion (GO:0006626)	-0.341696	-2.2125	0	0.0093904	0.526	31/54	32.06%	TIMM10;TIMM13;AIP;NDUFA13;TIMM17B;TOMM22;ROMO1;FIS1;TIMM8A;MGARP;TOMM40L;TIMM8B;TOMM7;GRPEL1;PAM16;TIMM17A;TOMM20;AIFM1;TIMM50;TOMM40;CHCHD4;TOMM34;HSP90AA1;TIMM10B;MTCH1;TIMM22;BCAP31;SAMM50;DNAJC19;TIMM44;TRMT10B	PVALBChC
784	GO_Molecular_Function_2023__Protein Tyrosine Kinase Activity (GO:0004713)	0.273649	2.21214	0.00297619	0.0506661	0.58	43/68	36.59%	FGFR3;EGFR;MUSK;FLT1;TEC;AXL;HCK;KIT;ROR1;FGFR2;DDR2;PTK2B;MERTK;ROR2;MST1R;ERBB2;PDGFRA;TYK2;RPS6KA5;TEK;MATK;TTBK1;RIPK2;CLK1;CSK;HIPK2;DYRK2;INSR;TNK2;PEAK1;JAK1;ABL1;YES1;BCR;IGF1R;ERBB4;EPHA4;ALK;ABL2;RYK;JAK2;HIPK3;EPHA7	PVALBChC
785	KEGG_2021_Human__Ribosome biogenesis in eukaryotes	-0.320898	-2.20972	0	0.00958638	0.539	45/70	40.55%	NHP2;NOP10;POP7;RPP25L;SNU13;IMP4;POP4;RPP25;NOB1;RAN;POP5;GAR1;EIF6;TBL3;CSNK2B;FBLL1;EMG1;IMP3;REXO5;NXT1;UTP15;RPP40;RIOK2;REXO2;SBDS;RRP7A;MPHOSPH10;NOL6;AK6;FCF1;GNL3;GTPBP4;UTP14A;DKC1;RPP38;TCOF1;RIOK1;UTP6;GNL2;RPP30;LSG1;WDR3;POP1;EFL1;HEATR1	PVALBChC
786	GO_Biological_Process_2023__Regulation Of Muscle Cell Differentiation (GO:0051147)	0.492162	2.20914	0	0.0491478	0.585	8/16	10.14%	MEGF10;LAMA1;FGFR2;SRF;MAPK11;ID2;PTBP1;CDK9	PVALBChC
787	GO_Molecular_Function_2023__Neurotransmitter Receptor Activity Involved In Regulation Of Postsynaptic Membrane Potential (GO:0099529)	0.467211	2.19825	0	0.0506236	0.609	16/18	40.23%	CHRNE;GRIK3;GRIN2C;GRIK4;GRIK1;GABRA2;GRIK2;GRIN2D;GRIN3A;GRIK5;GRIA1;GRIA3;GRIA4;GRIA2;GRIN2B;GRID1	PVALBChC
788	KEGG_2021_Human__Protein export	-0.465075	-2.19716	0.00168067	0.0106789	0.574	21/23	48.28%	SRP14;HSPA5;SEC61G;OXA1L;SPCS1;SRPRB;SRPRA;SEC11C;SEC61B;SEC62;SRP9;SRP68;SEC61A1;SRP19;SEC61A2;SRP72;SPCS3;SRP54;SEC11A;SPCS2;SEC63	PVALBChC
789	GO_Cellular_Component_2023__Mitochondrial Matrix (GO:0005759)	-0.220767	-2.18685	0	0.0116236	0.599	204/310	49.50%	NDUFB8;MRPL28;MRPL11;QARS1;MRPL40;ETFB;PRDX5;ALKBH7;GADD45GIP1;ARL2;ATP5F1D;FDX2;HSPE1;ACSS1;SHMT2;PDK2;GLDC;COASY;HSD17B10;POLRMT;GLRX5;MRPS12;MRPL34;NDUFS3;NDUFS8;PTCD1;IDH3B;CCNB1;ALAS1;NDUFS7;MRPL58;SCO2;MRPL49;PDHB;MPST;MRPL43;CPS1;BLOC1S1;BOLA3;SUOX;MRPL51;MRPL57;TBRG4;MRPL35;MRM3;TRMT5;ISCU;TXN2;PRORP;ATP5F1E;ACADL;ATP5F1B;PYROXD2;NUDT13;ERAL1;ACOT2;OXA1L;ARL2BP;FDXR;MRPL9;MDH2;SOD1;IDH3G;…	PVALBChC
790	GO_Cellular_Component_2023__Mitochondrial Envelope (GO:0005740)	-0.26741	-2.18059	0	0.0122274	0.62	56/122	27.86%	TIMM10;TIMM13;PRELID1;NDUFA2;NDUFA13;IFI27L2;CHCHD10;VRK2;ARL2;NDUFA6;NDUFS3;HAX1;BLOC1S1;NDUFB7;TIMM8A;HTRA2;NDUFA1;STOML2;TIMM8B;CHCHD2;CYCS;ATP5F1B;IFI6;COA4;CHCHD5;SLC25A20;OXA1L;ARL2BP;SLC25A4;SOD1;NDUFAF4;NDUFAB1;TMEM70;NAT8L;BNIP1;COA7;FKBP8;TMEM14A;DIABLO;AIFM1;SLC25A37;TMEM14C;CHCHD4;CPOX;NGRN;VDAC2;PINK1;REXO2;SDHD;NDUFA8;COA6;VDAC1;TIMM10B;TMEM14B;COX17;GATM	PVALBChC
791	GO_Biological_Process_2023__Adherens Junction Organization (GO:0034332)	0.393518	2.17459	0	0.0570571	0.672	18/27	33.20%	CDH8;CDH1;CDHR3;CDH26;CDH13;SMAD7;CDH3;CDH10;JAM3;CDH4;CSK;PIP5K1C;FERMT2;TBCD;CDH9;CDH2;PAK2;TJP1	PVALBChC
792	GO_Biological_Process_2023__Negative Regulation Of Cell Death (GO:0060548)	-0.351891	-2.17195	0	0.013133	0.65	35/49	41.16%	IKBKG;CDK5;CCN3;TMEM109;CHMP4A;HTRA2;PSMC5;NUP62;GBA1;PARK7;CHMP3;CHMP2A;CHGA;SNCA;MT3;VPS4A;HSPA1B;TIGAR;CHMP7;CHMP1A;BECN1;PINK1;EIF4G1;AKT1;TXNDC12;CHMP5;CHMP2B;TRAF2;ATP13A2;PEPD;BNIP3;XPNPEP1;DPP9;VPS35;VPS4B	PVALBChC
793	WikiPathway_2023_Human__IL 24 Signaling Pathway WP5413	-0.254854	-2.17191	0	0.0129854	0.65	77/156	32.34%	VEGFC;IKBKG;ELOB;PTPRC;NDUFA13;EIF5A;HSPE1;S100A6;TP53;EEF1E1;DNPH1;BAX;RELA;MAP1LC3A;CDK5RAP3;TGFB1;CCNB1;ITGA2B;CD82;TMBIM4;H2AX;ABCG2;CASP8;PCNA;ATF4;HSPA5;JUN;SPRYD4;CYCS;HLA-C;CENPA;DDIT3;NAA10;PARK7;SOD1;NFKBIA;GADD45G;ILK;AK1;SIGMAR1;CD36;BBC3;EIF4A1;VEGFA;AIFM1;KEAP1;HSPB1;YKT6;BECN1;CASP2;GSS;MAP2K7;XBP1;CASP3;STAT1;ODC1;HSP90AA1;ABCB1;EIF2A;PPP1R15A;MAPK3;GADD45A;PIK3CD;CCS;MEIS1;BCL2;D…	PVALBChC
794	GO_Cellular_Component_2023__Postsynaptic Density Membrane (GO:0098839)	0.351749	2.16871	0.00273224	0.0574941	0.682	26/33	40.60%	GRIK3;GRIN2C;GRIK4;NETO1;GRM1;GRIK1;GRIK2;CACNG8;SYNDIG1;GRIN2D;CACNG4;GRIN3A;DLG1;GRIK5;CACNG3;GRIA1;PTPRS;DLG2;GRM5;CACNG2;GRIA3;GRIA4;GRIA2;GRIN2B;GRID1;PLPPR4	PVALBChC
795	GO_Biological_Process_2023__Positive Regulation Of Cell Differentiation (GO:0045597)	0.210323	2.16	0	0.0589352	0.703	48/183	13.28%	YAP1;TGFBR2;GJA1;BMPR1B;DPF3;ZFP36L1;TNXB;SOX4;RGCC;HGF;AGT;ADAM8;GLIPR2;TMEM100;LRP5;NGF;REST;RANBP3L;MMD2;PRKCH;GDPD5;SMAD3;LOXL2;LAMA1;SOX9;TGFB3;DDR2;PTN;SRF;MAPK11;SOX11;WWTR1;CEACAM1;ID2;TCF3;BOC;LMO3;CEBPB;FRZB;RIPOR2;TP63;LRP3;BCL9L;ECT2;TRIM32;SMARCE1;ADIRF;LCP1	PVALBChC
796	KEGG_2021_Human__Proteasome	-0.376774	-2.15939	0.00153374	0.0142029	0.682	34/40	50.42%	PSMB4;PSMB6;PSMC4;ADRM1;PSME2;PSMB5;PSME1;PSMD8;PSMC5;PSMA7;PSMB3;PSMD2;PSMC3;POMP;PSME3;PSMD13;PSMD4;PSMA1;PSMA6;PSMA4;PSMA5;PSMD7;PSMD3;PSMC1;PSMB1;PSMB7;PSMA3;PSMC6;PSMC2;PSMB2;PSMD12;PSMD6;PSME4;PSMD14	PVALBChC
797	GO_Cellular_Component_2023__Organelle Envelope Lumen (GO:0031970)	-0.322011	-2.15549	0	0.0147307	0.696	31/61	27.86%	TIMM10;TIMM13;PRELID1;CHCHD10;ARL2;TUBB2A;HAX1;BLOC1S1;NDUFB7;TIMM8A;HTRA2;STOML2;TIMM8B;CHCHD2;CYCS;COA4;CHCHD5;ARL2BP;SOD1;COA7;DIABLO;AIFM1;CHCHD4;CPOX;PINK1;REXO2;NDUFA8;COA6;TIMM10B;COX17;GATM	PVALBChC
798	GO_Biological_Process_2023__Protein Targeting To ER (GO:0045047)	-0.45446	-2.15335	0.00160772	0.0147371	0.699	21/22	48.28%	GET3;CHMP4A;SRP14;SEC61G;ZFAND2B;UBL4A;SGTA;SPCS1;ZFAND2A;SRPRB;SRPRA;SEC62;SRP9;SEC61A1;EDEM1;SRP72;SGTB;SPCS3;SRP54;SPCS2;SEC63	PVALBChC
799	GO_Cellular_Component_2023__9+2 Motile Cilium (GO:0097729)	0.323071	2.14454	0.00309598	0.0639463	0.74	25/43	27.35%	DNAH8;RSPH6A;TCTE1;TTC29;TEKT5;DNAH11;ODAD4;SAXO1;TEKT3;CFAP74;CFAP70;AK8;TTLL3;DNAH2;ENKUR;IQCG;SAXO2;DNAH5;CCDC181;QRICH2;FLACC1;GAS8;DNHD1;CFAP221;WBP2NL	PVALBChC
800	GO_Molecular_Function_2023__Chemoattractant Activity (GO:0042056)	-0.536658	-2.12382	0.00163666	0.0191397	0.792	12/15	28.50%	VEGFC;NTF3;FGF7;LGALS3;FGF2;VEGFA;MEN1;BMP4;HMGB2;COLEC10;VEGFB;CX3CL1	PVALBChC
801	WikiPathway_2023_Human__Extracellular Vesicle Mediated Signaling In Recipient Cells WP2870	0.402397	2.11351	0	0.0772323	0.814	9/23	8.84%	TGFBR2;TGFBR3;EGFR;HGF;TGFA;SMAD3;TGFB3;NRAS;ERBB2	PVALBChC
802	GO_Biological_Process_2023__Establishment Of Protein Localization To Mitochondrion (GO:0072655)	-0.362869	-2.11115	0.00314961	0.0209529	0.814	24/40	31.68%	TIMM10;TIMM13;AIP;TIMM17B;TOMM22;ROMO1;FIS1;MGARP;TOMM40L;TIMM8B;TOMM7;GRPEL1;PAM16;TIMM17A;TOMM20;TIMM50;TOMM40;CHCHD4;TOMM34;PINK1;BCAP31;AKT1;DNAJC19;TIMM44	PVALBChC
803	GO_Biological_Process_2023__Maturation Of SSU-rRNA (GO:0030490)	-0.375412	-2.10844	0	0.0211758	0.82	27/36	42.29%	SNU13;UTP3;RPS16;NOB1;TSR2;TSR3;RPS28;RPS14;IGF2BP3;MRPS11;DCAF13;WDR46;RIOK2;MPHOSPH10;LSM6;RPS8;NGDN;NOP14;RPS19;RRP36;TSR1;RIOK1;UTP6;SPPL2B;WDR3;HEATR1;NAT10	PVALBChC
804	GO_Molecular_Function_2023__Voltage-Gated Calcium Channel Activity (GO:0005245)	0.339228	2.10712	0.0056338	0.0780297	0.827	27/35	41.28%	CACNA1I;SCN11A;CACNA1E;OPRM1;CACNA2D1;SCN5A;TRPV1;CACNA2D3;SCN7A;CACNG8;CACNA1G;CACNG4;CACNA2D2;SCN3A;CACNB2;RYR1;CACNA1C;CACNA1B;CACNA1A;CACNG3;CACNG2;SCN2A;CACNB4;SCN1A;SCN8A;CACNA1D;PKD2	PVALBChC
805	GO_Cellular_Component_2023__Motile Cilium (GO:0031514)	0.282189	2.10501	0	0.0767596	0.831	27/56	24.64%	CFAP300;MNS1;DNAH11;ODAD4;CFAP61;SAXO1;RSPH1;CFAP91;ROPN1B;CFAP70;AK8;DNAH2;ENKUR;CABYR;RSPH4A;IQCG;BBS2;CEP20;DNAH5;IFT46;CAMSAP3;IFT52;GAS8;NPHP1;IQUB;BBS4;WDR19	PVALBChC
806	GO_Molecular_Function_2023__General Transcription Initiation Factor Binding (GO:0140296)	-0.419017	-2.10491	0	0.0214839	0.826	20/27	39.28%	DRAP1;TP53;BCL10;RELA;THAP7;JUN;RUVBL2;PSMC5;ZFP36L2;ESR1;GTF2A2;AKR1B1;TAF13;TAF12;GTF2F1;TBP;RUVBL1;GTF2B;DR1;TAF11	PVALBChC
807	GO_Biological_Process_2023__Gamma-Aminobutyric Acid Signaling Pathway (GO:0007214)	0.449254	2.10062	0	0.0760239	0.837	9/17	22.82%	GABRG1;GABRB1;GABRA3;GABRA4;GNAI2;GPR156;GABRA6;GABRA2;SHISA7	PVALBChC
808	GO_Biological_Process_2023__Collagen Fibril Organization (GO:0030199)	0.382834	2.09392	0.00243902	0.0770204	0.851	12/26	13.97%	COL11A2;COL14A1;GREM1;LOXL2;DDR2;PXDN;COL27A1;P3H4;ADAMTS2;BMP1;COL5A2;COL5A1	PVALBChC
809	MSigDB_Hallmark_2020__Fatty Acid Metabolism	-0.255788	-2.09062	0	0.0241645	0.866	86/125	47.90%	CA2;ACSS1;ECH1;UROD;HSD17B10;LDHA;MIF;IDH3B;LGALS1;MAOA;NTHL1;DHCR24;PDHB;CPT2;ENO2;PSME1;YWHAH;ERP29;ACADL;MDH1;ADSL;PCBD1;ACOT2;H2AZ1;CBR1;MDH2;IDH3G;UBE2L6;ACADS;CD36;GRHPR;CBR3;ECI1;GAD2;AOC3;GABARAPL1;GSTZ1;NCAPH2;CPOX;SDHA;CA4;HCCS;HMGCL;TP53INP2;ACAA1;ODC1;SDHD;ECI2;HSP90AA1;NSDHL;CRAT;ALAD;ALDH9A1;KMT5A;APEX1;ACADVL;ECHS1;RDH11;ALDOA;IDI1;ACAT2;AADAT;SERINC1;OSTC;GCDH;ACOT8;HSDL2;ADIPOR2;…	PVALBChC
810	GO_Biological_Process_2023__Regulation Of Telomerase RNA Localization To Cajal Body (GO:1904872)	-0.509002	-2.09054	0	0.023957	0.866	14/17	36.00%	NHP2;NOP10;CCT7;RUVBL2;CCT3;CCT5;CCT6A;RUVBL1;DKC1;SHQ1;TCP1;CCT4;CCT8;EXOSC10	PVALBChC
811	GO_Biological_Process_2023__Positive Regulation Of Peptidase Activity (GO:0010952)	-0.461192	-2.08793	0	0.0242663	0.872	15/21	30.76%	PSENEN;PRELID1;RCAN3;NDUFA13;MAPK12;CLDN4;PSME2;PSME1;CTSH;PINK1;PSME3;NCSTN;CTSL;DDRGK1;CTSS	PVALBChC
812	GO_Biological_Process_2023__Wnt Signaling Pathway (GO:0016055)	0.298689	2.08641	0.00278552	0.0784469	0.859	26/49	26.44%	PLCG2;GPC4;TCF7L1;LRP5;CD24;WLS;PORCN;FZD4;DVL1;WNT3;FRZB;BCL9;BCL9L;FZD6;RARG;WNT5B;WNT16;NXN;TCF7L2;WNT2B;KLHL12;TMEM67;LRRK2;FERMT2;SIAH1;DIXDC1	PVALBChC
813	GO_Cellular_Component_2023__Adherens Junction (GO:0005912)	0.224788	2.0863	0	0.0762031	0.86	29/117	10.71%	CDC42EP4;NDRG1;SHROOM4;NOTCH1;CNN3;SHROOM3;EZR;LDB3;CDH8;PKP2;PDLIM5;PARD3B;CDH1;PLPP3;ARVCF;MSN;MYO1E;CHAF1B;KIFC3;CRB1;CDHR3;CDH26;CEACAM1;CDH13;SMAD7;TNKS1BP1;WTIP;CDH3;CDH10	PVALBChC
814	GO_Biological_Process_2023__Glycolytic Process (GO:0006096)	-0.51525	-2.07812	0	0.026111	0.894	11/16	25.79%	TPI1;GAPDH;LDHA;ALDOC;ENO2;ENO1;PFKM;PGK1;PGAM1;PFKFB2;PKM	PVALBChC
815	KEGG_2021_Human__Glycine, serine and threonine metabolism	-0.419447	-2.06641	0	0.0283457	0.904	17/24	31.95%	SHMT2;GLDC;GCAT;ALAS1;MAOA;GAMT;GRHPR;PHGDH;CHDH;AOC3;PGAM1;PIPOX;SHMT1;GATM;GCSH;PSPH;SRR	PVALBChC
816	GO_Biological_Process_2023__Carbohydrate Biosynthetic Process (GO:0016051)	0.466483	2.06593	0	0.0854643	0.897	10/16	24.22%	ST6GALNAC6;ST6GALNAC5;FUT2;ST8SIA6;B3GALT4;B3GALT2;ST3GAL4;ST3GAL2;ST3GAL3;ST3GAL6	PVALBChC
817	GO_Biological_Process_2023__Eye Development (GO:0001654)	0.340709	2.06384	0.0025974	0.0843192	0.902	22/32	35.73%	EFEMP1;CHRDL1;BMPR1B;MEIS2;SH3PXD2B;PBX4;COL5A2;COL5A1;POLR2D;SOX2;SMOC1;PBX3;SMG9;PBX1;HIPK2;SHROOM2;SIPA1L3;CACNA1C;FBN1;SKI;ATF6;CEP290	PVALBChC
818	GO_Biological_Process_2023__Protein Insertion Into ER Membrane (GO:0045048)	-0.409549	-2.05954	0.00157729	0.029889	0.916	21/27	41.04%	RAB5IF;TMEM147;NOMO2;GET3;EMC6;EMC9;EMC10;UBL4A;SGTA;EMC4;MMGT1;TRAM1L1;EMC7;EMC3;GET1;CAMLG;SEC61A1;NOMO1;NCLN;NOMO3;TRAM1	PVALBChC
819	KEGG_2021_Human__B cell receptor signaling pathway	-0.325598	-2.05586	0.00158228	0.0303982	0.92	19/54	14.62%	IKBKG;INPPL1;NFKBIE;FOS;RASGRP3;VAV3;BLNK;BCL10;RELA;SYK;RAC3;PPP3R2;HRAS;NFKBIB;JUN;LYN;PIK3R2;NFKBIA;CD81	PVALBChC
820	GO_Biological_Process_2023__Calcium Ion Transmembrane Import Into Cytosol (GO:0097553)	0.270319	2.04709	0	0.0888549	0.918	29/58	27.78%	PLCG2;CACNA1I;GRIN2C;SCN11A;FLNA;CACNA1E;CACNA2D1;SCN5A;PLCE1;SLC24A1;PLCH2;TRPV1;CHERP;SLC24A2;SLC8A2;SCN7A;SLC8A1;PLCH1;CACNA1G;PLCB4;GRIN1;ITPR2;CLU;JPH4;GRIN2D;JPH3;SCN3A;RYR1;ITPR1	PVALBChC
821	GO_Molecular_Function_2023__mRNA 5'-UTR Binding (GO:0048027)	-0.451372	-2.04657	0	0.0324537	0.935	15/22	33.75%	SHMT2;RPS3A;RPL41;RPS13;RPS7;RPS14;RPL26;IGF2BP3;RPL5;MRPS11;LARP6;SHMT1;GNL3;NCL;RSL1D1	PVALBChC
822	GO_Biological_Process_2023__Cell Surface Receptor Signaling Pathway Involved In Cell-Cell Signaling (GO:1905114)	0.397667	2.03795	0	0.0911973	0.926	11/22	19.40%	PLCG2;GPC4;LRP5;CD24;WLS;PORCN;FZD4;BMP2;NXN;P2RX7;KLHL12	PVALBChC
823	GO_Biological_Process_2023__Aortic Valve Morphogenesis (GO:0003180)	0.418905	2.03473	0.008	0.0902662	0.932	7/19	5.79%	TGFBR2;HEY1;NOTCH1;SNAI2;SLIT1;ROBO1;SOX9	PVALBChC
824	GO_Biological_Process_2023__Cardiac Muscle Cell Differentiation (GO:0055007)	0.446205	2.03231	0.00514139	0.0893806	0.935	10/16	21.21%	GREM1;AKAP13;ALPK3;NRG1;KDM6B;MYH11;BMP2;CBY1;LRRC27;SLC8A1	PVALBChC
825	GO_Molecular_Function_2023__Receptor Ligand Activity (GO:0048018)	-0.257809	-2.02771	0.00136426	0.0375978	0.957	51/112	25.48%	VGF;CRH;SST;VEGFC;POMC;SEMA3E;SEMA3B;CCK;BDNF;VIP;DPP4;SFRP2;CLEC11A;TGFB1;PGLYRP1;NTF3;SEMA4C;NPPC;INSL6;TNFSF12;FGF7;LGALS3;SEMA3C;FGF1;GNRH1;METRN;CHGB;HSPA1A;IL7;SEMA7A;HBEGF;FGF2;PTHLH;VEGFA;JAG1;SEMA6D;MEN1;SEMA4G;BMP4;IGF1;CRLF1;IL18;HMGB2;CSPG5;DLL1;COLEC10;AIMP1;PDGFA;NBL1;NRG4;INHA	PVALBChC
826	WikiPathway_2023_Human__Hippo Merlin Signaling Dysregulation WP4541	0.2382	2.02514	0	0.0916203	0.944	26/82	16.32%	YAP1;ITGB8;ITGB4;FGFR3;EGFR;FLT1;ITGA10;CDH8;KIT;ITGA6;CDH1;FGFR2;NRAS;WWTR1;CDH13;PDGFRA;CDH3;CDH10;ITGA7;PAK6;CDH4;ITGA3;ITGA1;CTNNA1;TEK;ITGAE	PVALBChC
827	GO_Cellular_Component_2023__Catenin Complex (GO:0016342)	0.397665	2.02428	0.00806452	0.0898911	0.945	10/21	17.35%	CDH8;CDH1;CDHR3;CDH26;CDH13;CDH3;CDH10;CDH4;CTNNA1;CTNND1	PVALBChC
828	GO_Biological_Process_2023__Aortic Valve Development (GO:0003176)	0.405294	2.01966	0.00261097	0.0909873	0.952	7/20	5.79%	TGFBR2;HEY1;NOTCH1;SNAI2;SLIT1;ROBO1;SOX9	PVALBChC
829	GO_Cellular_Component_2023__Postsynaptic Specialization Membrane (GO:0099634)	0.318777	2.01848	0.00284091	0.0896128	0.954	28/37	40.60%	GRIK3;GRIN2C;GRIK4;NETO1;GRM1;GRIK1;NLGN1;GRIK2;CACNG8;SYNDIG1;GRIN2D;CACNG4;GRIN3A;DLG1;GRIK5;LRRTM2;CACNG3;GRIA1;PTPRS;DLG2;GRM5;CACNG2;GRIA3;GRIA4;GRIA2;GRIN2B;GRID1;PLPPR4	PVALBChC
830	GO_Biological_Process_2023__Regulation Of Osteoblast Differentiation (GO:0045667)	0.257779	2.01481	0	0.0897994	0.957	27/61	25.18%	YAP1;BMPR1B;NOTCH1;HGF;SNAI2;LRP5;REST;RANBP3L;GREM1;SOX9;FGFR2;DDR2;SOX11;WWTR1;SEMA4D;TP63;LRP3;CRIM1;LIMD1;SMOC1;CTNNBIP1;TRPM4;ACVR2B;SUFU;PPARG;FERMT2;SCUBE3	PVALBChC
831	GO_Biological_Process_2023__Tail-Anchored Membrane Protein Insertion Into ER Membrane (GO:0071816)	-0.496039	-2.01126	0.00315956	0.0422383	0.969	12/15	34.59%	GET3;EMC6;EMC9;EMC10;UBL4A;SGTA;EMC4;MMGT1;EMC7;EMC3;GET1;CAMLG	PVALBChC
832	WikiPathway_2023_Human__10Q22Q23 Copy Number Variation WP5402	0.298287	2.00858	0	0.0913557	0.961	32/44	41.21%	RSPH6A;LDB3;RSPH14;SHLD3;SIRT4;RSPH1;SHLD1;ACTN2;TSPAN14;SF3B4;ADIRF;RSPH4A;BMP2;CDHR1;MAD2L2;NME5;IQUB;PPARG;RSPH3;SHLD2;SMC1A;SH3GL3;ERBB4;NFKB1;STAG1;CCSER2;ZMYND11;NRG3;PDS5A;GRID1;BMPR1A;PDS5B	PVALBChC
833	GO_Biological_Process_2023__Defense Response To Gram-positive Bacterium (GO:0050830)	-0.50009	-2.00218	0.0033557	0.0451098	0.976	10/15	21.67%	FAU;ROMO1;PPP1R11;PGLYRP1;RPL39;CHGA;LYG2;IL18;HLA-A;HMGB2	PVALBChC
834	MSigDB_Hallmark_2020__mTORC1 Signaling	-0.223758	-2.00091	0	0.0452506	0.976	109/177	45.53%	TUBG1;TPI1;FKBP2;ATP5MC1;CORO1A;DHCR7;CD9;EBP;HSPE1;TUBA4A;CALR;SHMT2;EEF1E1;GAPDH;LDHA;SCD;ABCF2;DDIT4;PPIA;DHCR24;PSMC4;TM7SF2;HSPA5;NFKBIB;HMBS;PSMB5;CCNF;DDX39A;GLA;DDIT3;FDXR;SLC2A1;BTG2;CACYBP;UNG;COPS5;DHFR;MTHFD2;PHGDH;CYP51A1;RRP9;ENO1;RPN1;PRDX1;CCNG1;NUFIP1;ARPC5L;PGK1;TOMM40;MAP2K3;YKT6;CCT6A;PDAP1;SQLE;IFRD1;XBP1;PSME3;PIK3R3;PPP1R15A;BHLHE40;EIF2S2;STARD4;PSMD13;RIT1;PNO1;MCM4;PSMA4…	PVALBChC
835	WikiPathway_2023_Human__Metabolic Epileptic Disorders WP5355	-0.29787	-1.99994	0.00143678	0.0451957	0.976	37/66	34.81%	SLC25A5;TPI1;SLC25A1;SHMT2;GLDC;GAPDH;LDHA;ALDOC;ENO2;CPS1;SUOX;LDHB;GAMT;MDH1;SLC2A1;MDH2;CDO1;PHGDH;GLS2;SPCS1;ENO1;ASS1;PFKM;PGK1;PGAM1;AASS;MPC2;PKM;SHMT1;GATM;ASL;PSPH;GOT2;ECHS1;ALDOA;AADAT;MPC1	PVALBChC
836	GO_Biological_Process_2023__Ventricular Cardiac Muscle Tissue Morphogenesis (GO:0055010)	0.415276	1.98231	0.00992556	0.105729	0.976	8/19	9.45%	TGFBR3;NOTCH1;PKP2;LRP2;FGFR2;NRG1;SMAD7;ZFPM2	PVALBChC
837	GO_Biological_Process_2023__Calcium-Dependent Cell-Cell Adhesion Via Plasma Membrane Cell Adhesion Molecules (GO:0016339)	0.349014	1.97724	0.00824176	0.107205	0.979	12/28	13.59%	PCDHB6;CDH8;CDH1;PCDHB2;CDHR3;CDH26;CDH13;PCDHB4;CDH3;CDH10;CDH4;PCDHB16	PVALBChC
838	WikiPathway_2023_Human__GPCRs Class A Rhodopsin Like WP455	0.265242	1.96558	0.00993377	0.113391	0.982	21/59	12.43%	ADRA1A;EDNRB;ADORA1;OPN3;HRH1;P2RY11;GPR68;MC1R;SSTR2;GPR75;HTR7;PTAFR;GPR83;OPRM1;HTR4;CCKBR;GPR63;NMBR;HTR5A;ADRA1D;GPR35	PVALBChC
839	GO_Biological_Process_2023__Protein Insertion Into Mitochondrial Membrane (GO:0051204)	-0.399641	-1.96521	0.00668896	0.0593039	0.992	17/26	32.06%	TIMM10;TIMM13;NDUFA13;TOMM22;ROMO1;TIMM8A;TIMM8B;TOMM7;MOAP1;TOMM20;TOMM40;HSP90AA1;TIMM10B;MTCH1;TIMM22;SAMM50;TRMT10B	PVALBChC
840	GO_Molecular_Function_2023__Protein Kinase Inhibitor Activity (GO:0004860)	-0.363173	-1.96412	0.00473186	0.0592959	0.992	31/35	56.08%	QARS1;PPP1R1B;CIB1;SPRY4;RACK1;CAMK2N2;GSKIP;SNCA;DUSP19;SPRY2;HEXIM1;SPRED2;SH3BP5L;INKA2;YWHAB;CDKN1B;SMCR8;MAPK8IP1;CAMK2N1;SPRED1;GMFB;NCK1;MBIP;DUS2;NPM1;DNAJC3;SH3BP5;MACROH2A1;CEP43;IBTK;TAOK3	PVALBChC
841	KEGG_2021_Human__Phagosome	-0.262715	-1.9635	0	0.0590571	0.992	30/91	16.17%	ATP6V1F;TLR6;RILP;CORO1A;THBS2;ITGA2;TUBA4A;CALR;MRC1;ATP6V0B;C3;TUBB2A;TUBA1B;ATP6AP1;TUBB4B;TAP1;ATP6V1G1;ITGA5;TUBB3;ITGB5;TUBA1A;SEC61G;HLA-C;ATP6V1G2;TUBB4A;TUBB;MSR1;ACTG1;TUBB2B;CD36	PVALBChC
842	WikiPathway_2023_Human__Eukaryotic Transcription Initiation WP405	-0.340164	-1.94978	0.003125	0.0651268	0.995	29/41	42.04%	POLR2J;POLR1E;POLR2G;POLR2I;ILK;TAF5;GTF2A2;POLR2H;TAF13;POLR3K;POLR2K;TAF12;POLR2E;POLR3E;ERCC2;POLR2C;TAF7;GTF2H2C;GTF2H2;TAF6;TBP;TAF9;GTF2F2;POLR3H;GTF2B;POLR2A;GTF2H3;CDK7;GTF2H1	PVALBChC
843	GO_Biological_Process_2023__Chaperone-Mediated Protein Complex Assembly (GO:0051131)	-0.427714	-1.94502	0.00480769	0.0671508	0.995	17/20	45.30%	PFDN6;PSMG3;PTGES3L;BBS10;BBS12;HSPA1A;HSP90AB1;HOPX;HSP90AA1;CCT2;TMEM35A;MKKS;NDUFAF1;HSPD1;LONP1;HSPA4;PTGES3	PVALBChC
844	GO_Molecular_Function_2023__High Voltage-Gated Calcium Channel Activity (GO:0008331)	0.393076	1.94433	0.00771208	0.124552	0.989	15/18	40.24%	CACNA1I;SCN11A;CACNA1E;SCN5A;SCN7A;CACNA1G;SCN3A;CACNB2;CACNA1C;CACNA1B;SCN2A;CACNB4;SCN1A;SCN8A;CACNA1D	PVALBChC
845	KEGG_2021_Human__Fructose and mannose metabolism	-0.405532	-1.94232	0.00474684	0.0681072	0.995	16/24	32.46%	TPI1;GMPPB;GFUS;ALDOC;KHK;GMPPA;PMM1;AKR1B1;TIGAR;FPGT;PFKM;MPI;PFKFB2;PFKFB4;SORD;ALDOA	PVALBChC
846	GO_Biological_Process_2023__'De Novo' Post-Translational Protein Folding (GO:0051084)	-0.398067	-1.94132	0.00330033	0.0680236	0.995	24/27	51.13%	DNAJB5;HSPE1;HSPA8;SDF2;HSPA2;HSPA5;DNAJB4;HSPA1A;HSPA1B;CHCHD4;ENTPD5;CCT2;DNAJB1;HSPA9;ST13;DNAJB12;HSPA14;PTGES3;HSPA13;SELENOF;DNAJC18;GAK;DNAJC7;ERO1A	PVALBChC
847	GO_Biological_Process_2023__Organic Hydroxy Compound Transport (GO:0015850)	0.335157	1.93953	0.00573066	0.125582	0.99	12/29	14.05%	ABCC2;SLCO2B1;SLC5A11;SLC10A5;SLC22A3;ABCG5;SLC22A1;CEACAM1;SLC29A3;ABCG8;ABCC4;POLR2D	PVALBChC
848	GO_Biological_Process_2023__Hematopoietic Progenitor Cell Differentiation (GO:0002244)	-0.472695	-1.92907	0.00156495	0.0734982	0.998	11/16	30.47%	PTPRC;TP53;FLT3;FSTL3;TGFB1;LYN;BMP4;ARMC6;SBDS;SHH;MLF1	PVALBChC
849	WikiPathway_2023_Human__Glycolysis And Gluconeogenesis WP534	-0.381992	-1.92899	0.00323102	0.0728916	0.998	22/29	42.47%	TPI1;GAPDH;LDHA;ALDOC;ENO2;LDHB;MDH1;SLC2A1;MDH2;ENO1;PFKM;PGK1;PGAM1;MPC2;PKM;GOT2;ALDOA;MPC1;GOT1;PC;SLC2A3;PDHA1	PVALBChC
850	GO_Biological_Process_2023__Notch Signaling Pathway (GO:0007219)	0.329389	1.92855	0.00515464	0.13163	0.992	16/29	24.88%	ZNF423;HEY1;NOTCH1;MAML3;SNAI2;NLE1;DTX2;JAG2;BMP2;DTX4;APH1B;DTX1;CRTC1;SORBS2;NOTCH2;MAML1	PVALBChC
851	GO_Biological_Process_2023__Autophagy Of Mitochondrion (GO:0000422)	-0.326586	-1.92612	0	0.074025	0.998	32/45	45.80%	MAP1LC3A;FIS1;ATG9B;GABARAP;FUNDC2;PHB2;ATG2A;ATG9A;GABARAPL2;CISD2;GABARAPL1;BECN1;ARFIP2;PINK1;MAP1LC3B;ATG4D;WDR45;FUNDC1;ATG3;TAFAZZIN;WIPI2;SPATA33;WDR45B;USP30;WIPI1;BNIP3;ATG13;ATG14;FBXO7;RIMOC1;SQSTM1;ATG12	PVALBChC
852	GO_Biological_Process_2023__Regulation Of Sodium Ion Transport (GO:0002028)	0.347932	1.9228	0.00544959	0.134024	0.992	11/27	13.21%	NKAIN2;PKP2;NKAIN4;SNTA1;PER1;SCN5A;P2RX4;NEDD4;SCN3B;NOS1;NKAIN3	PVALBChC
853	GO_Biological_Process_2023__Circulatory System Development (GO:0072359)	0.226222	1.92085	0.00682594	0.133268	0.992	27/87	16.19%	TGFBR2;GJA1;HEY1;NOTCH1;SOX4;LDB3;PKP2;PDLIM5;SH3PXD2B;AKAP13;ALPK3;PCSK5;SOX9;DNAAF4;SRF;PLCE1;ID2;ADAP2;ZFPM2;KDM6B;DVL1;STK11;POLR2D;BMP2;NXN;FN1;TEK	PVALBChC
854	WikiPathway_2023_Human__Hippo Signaling Regulation Pathways WP4540	0.231489	1.91775	0.003125	0.13341	0.992	39/75	33.36%	YAP1;FGFR3;EGFR;FLT1;TCF7L1;CDH8;KIT;PRKCH;SMAD3;CDH1;FGFR2;WWTR1;CDH13;PDGFRA;CDH3;CDH10;GNAI2;CDH4;TCF7L2;TEK;PRKCQ;NF2;CDH20;PLCB4;PRKAB1;PRKAB2;GNA11;PRKCA;INSR;PRKAG2;PRKAR2B;PRKAR2A;PRKAR1B;MTOR;CDH9;CDH2;IGF1R;PRKCZ;PLCB1	PVALBChC
855	KEGG_2021_Human__Taste transduction	0.291356	1.91502	0.00854701	0.133473	0.994	17/39	21.83%	PKD1L3;GABRA3;TAS2R19;TAS2R20;TAS2R13;PDE1C;ASIC2;GABRA4;GRM4;TAS2R14;TAS2R30;PDE1B;GRM1;TAS2R4;GABRA6;GABRA2;PLCB4	PVALBChC
856	GO_Biological_Process_2023__Glial Cell Development (GO:0021782)	-0.463198	-1.91282	0	0.0812277	0.999	10/15	31.67%	MYRF;EIF2B4;PRDM8;NSUN5;EIF2B2;CSPG5;DLL1;EIF2B5;TPPP;EIF2B1	PVALBChC
857	GO_Biological_Process_2023__Negative Regulation Of Intrinsic Apoptotic Signaling Pathway (GO:2001243)	-0.30125	-1.90728	0.00736377	0.0839037	0.999	29/53	31.59%	NDUFA13;NOL3;SFRP2;NDUFS3;CDKN2D;PPIA;HTRA2;MAPK7;HSPA1A;CREB3;PARK7;PPIF;NOC2L;ENO1;HYOU1;SYVN1;HSPB1;TPT1;PINK1;XBP1;HERPUD1;CCAR2;CXCL12;SELENOS;DNAJA1;BCL2;SRC;AKT1;TXNDC12	PVALBChC
858	GO_Biological_Process_2023__Positive Regulation Of Epithelial Cell Proliferation (GO:0050679)	0.227818	1.89981	0.00299401	0.144672	0.995	27/78	16.19%	YAP1;STAT5A;RREB1;EGR3;EGFR;C5AR1;TGFA;SOX9;FGFR2;PTN;VASH2;VEGFD;EGFL7;SOX11;NRAS;SEMA5A;SCN5A;PDCD6;CDH13;ERBB2;ZNF304;CDH3;NELL2;GRN;BMP2;TCF7L2;TEK	PVALBChC
859	MSigDB_Hallmark_2020__Interferon Gamma Response	0.204891	1.89741	0.00361011	0.144473	0.995	43/115	21.77%	DDX60;IL4R;IFI44;MVP;TXNIP;XAF1;MT2A;EPSTI1;APOL6;PARP14;HLA-B;SP110;DHX58;CD274;ARL4A;PARP12;BANK1;IFITM3;VAMP8;IFIH1;FAS;CIITA;MARCHF1;SERPING1;HLA-DMA;C1S;EIF4E3;PSMA2;IRF1;TRIM25;LAP3;BPGM;ZNFX1;SLC25A28;RSAD2;WARS1;IL15RA;TRAFD1;IFNAR2;TRIM14;SSPN;STAT3;RIPK2	PVALBChC
860	WikiPathway_2023_Human__GPCRs Other WP117	0.316851	1.89734	0.00276243	0.142264	0.995	13/31	14.81%	GNRHR;P2RY11;ADGRD1;SSTR2;HTR7;GPR83;ADGRV1;CELSR3;CCKBR;ADRA1D;VN1R1;OR2M4;GRM1	PVALBChC
861	GO_Biological_Process_2023__Positive Regulation Of Signal Transduction By P53 Class Mediator (GO:1901798)	-0.448104	-1.8953	0.00676819	0.0908917	0.999	9/17	19.87%	EIF5A;EEF1E1;CDK5RAP3;RPS7;RPL17;RPS15;UBB;HEXIM1;SPRED2	PVALBChC
862	GO_Biological_Process_2023__Embryonic Organ Development (GO:0048568)	0.288595	1.89367	0.00285714	0.143241	0.995	18/39	23.24%	TGFBR2;HEY1;KIT;PBX4;PCSK5;ESRRB;FGFR2;COL27A1;GLI3;COBL;RNF112;POLR2D;UTP25;SH2B3;TFEB;PBX3;PBX1;ERCC3	PVALBChC
863	GO_Biological_Process_2023__Vasculogenesis (GO:0001570)	0.425842	1.88839	0.00492611	0.145798	0.995	6/15	7.42%	ITGB8;TGFBR2;TGFBR3;NOTCH1;CUL7;EGFL7	PVALBChC
864	KEGG_2021_Human__Spliceosome	-0.231543	-1.88394	0.00140449	0.0973714	0.999	81/127	46.79%	U2AF1L4;PUF60;HSPA8;SNU13;DHX16;SNRPD2;LSM7;PQBP1;EIF4A3;SF3A1;THOC3;HSPA2;SF3B5;LSM4;ISY1;XAB2;HSPA1A;LSM2;SNRPG;SF3B2;PHF5A;HSPA1B;SRSF2;PCBP1;SNRPB;NCBP2;SRSF9;DDX23;SRSF8;LSM3;RBMXL1;SF3B6;LSM6;SNRPC;RP9;PRPF31;U2AF2;SRSF3;SART1;SLU7;LSM5;SYF2;CDC40;MAGOH;RBM8A;BCAS2;PRPF19;SF3A3;BUD31;SRSF7;PRPF38A;SNRPA1;PRPF8;ZMAT2;SNRPB2;SNRNP27;SNRPE;DHX38;SRSF6;U2AF1;PRPF38B;CWC15;SRSF1;SRSF10;SRSF5;SNR…	PVALBChC
865	KEGG_2021_Human__Cardiac muscle contraction	-0.294033	-1.88301	0.00921659	0.0972511	0.999	23/56	23.32%	CYC1;COX7C;UQCR10;COX6A1;COX5B;COX4I1;COX8A;COX6B1;COX7A1;UQCRFS1;UQCR11;ATP2A1;COX7B;CACNB3;COX7A2;COX5A;UQCRQ;COX6C;UQCRC1;ATP1A3;UQCRB;CACNB1;UQCRH	PVALBChC
866	GO_Biological_Process_2023__Cell-Cell Junction Organization (GO:0045216)	0.285861	1.88216	0.00293255	0.148966	0.996	14/41	14.18%	CDH8;PKP2;OCLN;SMAD3;CDH1;ARVCF;TGFB3;CDHR3;CDH26;CDH13;CDH3;CDH10;CDH4;GJC1	PVALBChC
867	GO_Biological_Process_2023__Regulation Of Chondrocyte Differentiation (GO:0032330)	0.413188	1.88186	0.00987654	0.14679	0.996	6/17	5.79%	EFEMP1;BMPR1B;SNAI2;GREM1;LOXL2;SOX9	PVALBChC
868	WikiPathway_2023_Human__Peptide GPCRs WP24	0.393412	1.8801	0.00763359	0.146348	0.996	8/18	9.66%	EDNRB;GNRHR;C5AR1;MC1R;SSTR2;OPRM1;CCKBR;NMBR	PVALBChC
869	MSigDB_Hallmark_2020__UV Response Dn	0.193521	1.87897	0.00353357	0.145001	0.996	93/127	47.24%	TGFBR2;TGFBR3;EFEMP1;GJA1;PMP22;FBLN5;F3;KIT;SNAI2;LTBP1;PDLIM5;FHL2;SMAD3;PLPP3;MT1E;ERBB2;ZMIZ1;SMAD7;ANXA4;COL5A2;SCHIP1;RXRA;LDLR;PTPRM;INSIG1;MGMT;PLCB4;GRK5;SFMBT1;PPARG;NOTCH2;PRKCA;RUNX1;VAV2;SLC7A1;DLG1;CDON;PRKAR2B;MMP16;INPP4B;IRS1;ABCC1;BCKDHB;ACVR2A;CACNA1A;IGF1R;TJP1;NFKB1;PEX14;MAPK14;RASA2;ICA1;NFIB;ADD3;KALRN;PHF3;APBB2;ADGRL2;MAGI2;PTEN;CDK13;AKT3;ATXN1;CELF2;PRKCE;SIPA1L1;KCNMA…	PVALBChC
870	GO_Biological_Process_2023__Mitochondrial Transport (GO:0006839)	-0.301225	-1.87881	0.00461538	0.0993594	0.999	26/50	31.68%	TIMM10;TIMM13;SLC25A5;AIP;TIMM17B;TOMM22;BCS1L;FIS1;MGARP;TIMM8B;SLC25A20;OXA1L;TOMM7;SLC25A4;PPIF;TIMM17A;TOMM20;TOMM40;TOMM34;PINK1;HSP90AA1;BCL2;BCAP31;BAD;DNAJC19;TIMM44	PVALBChC
871	GO_Biological_Process_2023__Positive Regulation Of Phospholipase C Activity (GO:0010863)	-0.429684	-1.87805	0.00806452	0.099135	0.999	11/19	17.89%	LPAR1;HRAS;HTR2B;PHB2;EDNRA;ESR1;PHB1;FGFR1;FGF2;P2RY12;HTR2A	PVALBChC
872	WikiPathway_2023_Human__Spinal Cord Injury WP2431	0.231809	1.87747	0.00319489	0.144297	0.996	16/68	7.00%	GFAP;RGMA;GJA1;NOX4;AQP4;EGFR;ACAN;SLIT3;SEMA6A;SLIT1;E2F5;MBP;NTN1;SOX9;VCAN;PTPRZ1	PVALBChC
873	GO_Biological_Process_2023__Cytoplasmic Translational Initiation (GO:0002183)	-0.366729	-1.87741	0.00784929	0.098742	0.999	22/28	46.52%	EIF3G;EIF6;MIF4GD;EIF4A1;EIF3I;EIF4A2;NCBP2;EIF3C;EIF2S2;EIF3K;EIF3D;EIF4G1;SLBP;EIF2S3;EIF3F;EIF3B;EIF3J;NCBP1;EIF3H;MCTS1;EIF5;EIF3M	PVALBChC
874	GO_Biological_Process_2023__Proteasomal Protein Catabolic Process (GO:0010498)	-0.20417	-1.87387	0	0.0991047	0.999	151/202	58.64%	RCAN3;PSMB4;HECTD3;PSMB6;CDC34;RNF5;STUB1;PSMC4;TNFAIP1;PSMB5;PSMD8;ANKRD9;PSMC5;ZFAND2B;DDIT3;SPSB4;MTA1;PSMA7;RNF122;RAD23A;RNF126;ENC1;DCAF11;PEX10;KCTD17;APC2;KCTD5;RNF139;AXIN2;SPSB3;UBE2A;FBXO45;PSMB3;SHARPIN;KAT5;KBTBD7;ZFAND2A;KLHDC3;GSK3A;SYVN1;PSMD2;PSMC3;GID8;FBXW5;KCTD10;ITCH;RNF187;UBXN1;XBP1;UBXN6;TOPORS;UBE2W;RNF41;PSMD13;KCTD2;PSMD4;PSMA1;PSMA6;DERL1;KBTBD6;PSMA4;KCTD13;UCHL1;PRPF…	PVALBChC
875	GO_Biological_Process_2023__DNA Modification (GO:0006304)	-0.453846	-1.87171	0.00655738	0.0998699	0.999	13/15	43.28%	EXOSC5;PARP3;NTHL1;NEIL2;MUTYH;UNG;MPG;SMUG1;NEIL1;PARP2;MBD4;PARP1;TDG	PVALBChC
876	GO_Molecular_Function_2023__Ribosome Binding (GO:0043022)	-0.262674	-1.86782	0.00418994	0.101941	0.999	54/78	49.39%	TMEM147;ZNF598;NOMO2;EIF1;EIF1B;EIF6;RACK1;SEC61G;ERAL1;NAA10;OXA1L;C1QBP;UNG;NME1;PIM1;RPSA;SHFL;PYM1;DHX33;TMEM223;MTIF2;EIF3C;SBDS;IGHMBP2;EEF2;RBM3;PELO;SEC61B;MTRES1;SRP68;BAG6;MTIF3;SEC61A1;SERBP1;NOMO1;SRP19;YTHDF1;ETF1;NCLN;SEC61A2;NOMO3;FMR1;DNAJC2;USP16;GUF1;SRP72;MALSU1;NPM1;CCDC47;MRPS27;CPEB2;DDX3X;ERI1;YTHDF3	PVALBChC
877	GO_Cellular_Component_2023__Precatalytic Spliceosome (GO:0071011)	-0.29616	-1.86543	0.00931677	0.102788	0.999	36/51	44.95%	SNU13;DHX16;SNRPD2;LSM7;SF3A1;SF3B5;LSM4;LSM2;SNRPG;RNF113A;SF3B2;PHF5A;SNRPB;LSM3;SF3B6;LSM6;PRPF31;RBMX2;SART1;LSM5;SF3A3;PRPF38A;SNRPA1;IK;PRPF8;ZMAT2;SNRPB2;SNRPE;PRPF38B;WBP4;SNRNP200;SNRPD1;PRPF3;SMU1;CWC22;PRPF6	PVALBChC
878	GO_Biological_Process_2023__Anterograde Axonal Transport (GO:0008089)	-0.335609	-1.86522	0.00607903	0.102197	0.999	31/37	55.96%	BLOC1S1;MGARP;NEFL;SOD1;BLOC1S4;KIF4A;TRIM46;HSPB1;AP3M2;SNAPIN;BLOC1S6;BLOC1S2;KIF1C;APEX1;ARL8A;AP3S2;RAB27B;AP3D1;MAP1A;KIF3A;ARL8B;KIF5B;KIF1A;KIF3B;MAPK8IP3;AP3S1;KIF5A;RAB21;SPAST;TRAK2;DTNBP1	PVALBChC
879	GO_Biological_Process_2023__Enzyme-Linked Receptor Protein Signaling Pathway (GO:0007167)	0.227435	1.86438	0.00332226	0.153685	0.998	22/80	12.15%	FGFR3;GUCY2C;EGFR;MUSK;FLT1;AXL;HCK;NGF;ROR1;SHC4;FGFR2;DDR2;MERTK;PTN;ROR2;MST1R;ERBB2;PTPRU;PDGFRA;NEDD9;GUCA1B;NPR2	PVALBChC
880	KEGG_2021_Human__Fluid shear stress and atherosclerosis	-0.250756	-1.86429	0.0013986	0.1021	0.999	43/92	31.46%	IKBKG;FOS;TP53;DUSP1;MAPK12;RELA;ITGA2B;RAC3;GSTP1;NPPC;CALM2;MAPK7;JUN;TXN2;PIK3R2;ACTG1;SUMO2;VEGFA;ACTB;BMP4;HSP90AB1;GSTM4;ASS1;KEAP1;CALM3;PLAT;MAP2K7;PDGFA;SDC2;RAC1;HSP90AA1;PIK3R3;NQO1;SUMO3;CTSL;PIK3CD;GSTO1;BCL2;SRC;TXN;CALM1;GSTM3;AKT1	PVALBChC
881	GO_Biological_Process_2023__Negative Regulation Of Hydrolase Activity (GO:0051346)	-0.348759	-1.86106	0	0.103731	0.999	13/33	16.56%	FICD;ECM1;ARL2;PLIN5;SH3BP4;GCHFR;HRAS;MAPK7;EGLN1;CSTB;RASA4;ATP5IF1;TMED2	PVALBChC
882	GO_Biological_Process_2023__Positive Regulation Of Establishment Of Protein Localization (GO:1904951)	-0.451331	-1.86054	0.00664452	0.103361	0.999	12/16	34.87%	WRAP53;CCT7;PTP4A3;CCT3;CCT5;CCT6A;CHP1;DKC1;TCP1;CCT4;CCT8;CEP135	PVALBChC
883	GO_Biological_Process_2023__Protein Neddylation (GO:0045116)	-0.39967	-1.85855	0.0064	0.103348	0.999	19/21	53.00%	RNF7;NEDD8;UBE2F;COPS7A;COPS5;GPS1;COPS8;UBE2M;DCUN1D3;COPS6;DCUN1D5;RBX1;COPS4;COPS3;UBA3;COPS2;DCUN1D2;DCUN1D1;NAE1	PVALBChC
884	WikiPathway_2023_Human__NRP1 Triggered Signaling Pathways In Pancreatic Cancer WP5144	0.283355	1.85819	0.00867052	0.157039	0.998	10/40	6.18%	TGFBR2;TGFBR3;EGFR;SEMA3A;HGF;FLT1;CCNE1;SNAI2;SMAD3;TGFB3	PVALBChC
885	WikiPathway_2023_Human__Parkin Ubiquitin Proteasomal System Pathway WP2359	-0.283472	-1.85754	0.00900901	0.103267	0.999	46/61	50.42%	TUBA4A;HSPA8;TUBB2A;TUBA1B;TUBB4B;GPR37;STUB1;PSMC4;CASP8;TUBB3;HSPA2;HSPA5;TUBA1A;PSMD8;PSMC5;HSPA1A;TUBB4A;TUBB;UBE2L6;TUBB2B;SNCA;HSPA1B;PSMD2;PSMC3;PSMD10;PSMD13;PSMD4;PSMD7;PSMD3;UBE2J2;PSMC1;SIAH2;UBE2L3;UBA1;HSPA9;UBE2J1;PSMC6;HSPA14;PSMC2;HSPA4;PSMD12;UBE2G2;PSMD6;PSMD5;FBXW7;PSMD14	PVALBChC
886	GO_Biological_Process_2023__Heme Biosynthetic Process (GO:0006783)	-0.460729	-1.85589	0.00985222	0.103653	0.999	10/15	28.38%	UROD;ALAS1;SLC25A38;HMBS;FXN;ATP5IF1;PGRMC1;CPOX;COX15;ALAD	PVALBChC
887	GO_Biological_Process_2023__Oligosaccharide Metabolic Process (GO:0009311)	0.303051	1.85301	0.00533333	0.159645	0.998	16/32	24.22%	ST6GALNAC6;ST6GALNAC5;FUT2;CTBS;IDUA;ST8SIA6;ST6GALNAC3;B3GALT4;B3GALT2;NEU1;ST3GAL4;ST3GAL2;ST3GAL3;ST6GAL2;B3GALT1;ST3GAL6	PVALBChC
888	GO_Biological_Process_2023__Pyruvate Metabolic Process (GO:0006090)	-0.354278	-1.84781	0.00961538	0.109041	0.999	17/30	31.95%	TPI1;NR4A3;GAPDH;LDHA;ALDOC;PDHB;ENO2;LDHB;ENO1;PFKM;PGK1;PGAM1;PFKFB2;PKM;VDAC1;LDHAL6A;SRR	PVALBChC
889	GO_Biological_Process_2023__Regulation Of Kinase Activity (GO:0043549)	0.258391	1.84769	0.00887574	0.162793	0.998	20/55	17.58%	FGFR3;EGFR;MUSK;FLT1;AXL;ROR1;FGFR2;DDR2;MERTK;ROR2;MST1R;PLCE1;ERBB2;PDGFRA;LDB2;ECT2;ZNF16;IRS2;TEK;ANKRD54	PVALBChC
890	WikiPathway_2023_Human__Nephrotic Syndrome WP4758	0.294264	1.84284	0.00898204	0.164628	0.998	12/33	14.35%	COL4A4;ITGB4;TRPC6;MYO1E;CUBN;GPC5;COL4A3;PLCE1;ANLN;ARHGAP24;ALG1;ITGA3	PVALBChC
891	GO_Biological_Process_2023__Intracellular Protein Transmembrane Transport (GO:0065002)	-0.30542	-1.83984	0.00927357	0.113751	0.999	30/43	45.00%	TIMM17B;PEX16;ROMO1;HSPA5;TOMM40L;SEC61G;ZFAND2B;GRPEL1;PEX10;PAM16;TIMM17A;TOMM20;HYOU1;TIMM50;TOMM40;CHCHD4;PEX6;SEC61B;DNAJC19;TIMM44;SEC62;SEC61A1;PEX5;PEX2;SEC61A2;TIMM21;HSPD1;TOMM70;PEX13;SRP54	PVALBChC
892	GO_Biological_Process_2023__Epithelial Cell Differentiation (GO:0030855)	-0.293312	-1.83957	0.00734214	0.113227	0.999	26/55	24.54%	PROX1;KRT10;MESP1;DNPH1;SCRIB;AKR1C1;TAGLN2;ALDOC;PCNA;LGALS3;EDF1;TPP1;CBR1;TAGLN;BDH2;FSTL1;GSTK1;HSF4;VEGFA;JAG1;PIH1D1;PLAAT3;BMP4;PGK1;E2F4;UPK2	PVALBChC
893	KEGG_2021_Human__Retrograde endocannabinoid signaling	-0.231362	-1.83223	0	0.118619	0.999	34/116	18.28%	NDUFV2;NDUFB8;NDUFC2;NDUFA2;NDUFA13;NDUFS5;NDUFB10;KCNJ5;GNG3;MAPK12;NDUFA4;NDUFA6;NDUFS3;NDUFS8;NDUFB11;NDUFS7;NDUFA11;SLC17A7;NDUFB7;NDUFA1;GNB2;GABRD;GNB3;NDUFB5;NDUFB9;GABRA5;NDUFAB1;SLC32A1;NDUFV1;NDUFC1;NDUFA3;NDUFS6;FAAH;NDUFB2	PVALBChC
894	GO_Biological_Process_2023__Endothelial Cell Migration (GO:0043542)	-0.384705	-1.83199	0.00502513	0.117986	0.999	15/25	27.03%	DPP4;CCN3;CORO1B;TNFSF12;NELL1;PXN;FSTL1;PTP4A3;VEGFA;MEN1;NR4A1;TNFRSF25;STARD13;STAT1;LPXN	PVALBChC
895	GO_Cellular_Component_2023__Excitatory Synapse (GO:0060076)	0.358929	1.83007	0.00516796	0.175047	0.998	11/21	23.05%	NETO1;FGFR2;SHISA6;ITGA3;NLGN3;SHANK1;AKAP5;NLGN1;GRIN1;SHISA7;SYNDIG1	PVALBChC
896	WikiPathway_2023_Human__7Q11 23 Copy Number Variation Syndrome WP4932	-0.24734	-1.82295	0.00692521	0.124136	1	36/86	27.20%	ABHD11;ATP5PO;ATP5MC1;ATP5F1D;GAPDH;ATP5MC3;VAMP2;H2AX;FBLN2;PCNA;ATF4;HSPA2;CLDN4;DNAJC30;ATP5F1E;ATP5F1B;BCL7B;NUP62;VPS37D;MYO1C;UBE2L6;MYBBP1A;VPS28;RFC5;HMGA1;CFL1;LAT2;ATP5PB;HDAC6;BECN1;MVB12A;BUD23;EIF2A;MAPK3;VPS37C;UBIAD1	PVALBChC
897	GO_Biological_Process_2023__Regulation Of Translational Initiation (GO:0006446)	-0.28292	-1.82259	0.00594354	0.123581	1	44/55	54.70%	EIF1;EIF1B;POLR2G;RPS6KB2;MIF4GD;IMPACT;EIF4A2;NCBP2;HSPB1;EIF2B2;MTIF2;EIF2B5;EIF4G1;EIF4EBP2;YTHDF1;PPP1R15B;BZW1;EIF3B;EIF4G2;FMR1;EIF4H;NCBP1;EIF3H;NCK1;PAIP1;EIF5;DDX1;EIF4B;YTHDF2;NPM1;PAIP2;DDX3X;YTHDF3;RPS6KB1;BZW2;UHMK1;EIF3E;CDC123;CSDE1;DNAJC3;EIF2AK4;TPR;HABP4;EIF5B	PVALBChC
898	KEGG_2021_Human__TGF-beta signaling pathway	0.243773	1.82058	0.00917431	0.179996	0.998	16/61	10.68%	TGFBR2;RGMA;BMPR1B;ID4;LTBP1;ACVR1C;GREM1;E2F5;SMAD3;INHBB;TGFB3;GREM2;ID2;SMAD7;AMH;SP1	PVALBChC
899	GO_Biological_Process_2023__Mitochondrial Cytochrome C Oxidase Assembly (GO:0033617)	-0.420355	-1.81919	0.00969305	0.125709	1	15/19	41.62%	SURF1;COA3;COX14;SCO2;PET100;COX16;COA8;TMEM223;COX17;COX20;COA5;COX19;SCO1;TIMM21;COX18	PVALBChC
900	WikiPathway_2023_Human__Vitamin A And Carotenoid Metabolism WP716	0.358172	1.81541	0.0078534	0.178119	0.998	11/21	19.94%	ALDH1A1;DHRS3;BCO1;ABCG5;SULT1A1;RETSAT;ABCG8;RARG;RXRA;ALDH1A2;SCARB1	PVALBChC
901	WikiPathway_2023_Human__Adipogenesis WP236	0.212119	1.81306	0.00632911	0.178078	0.998	35/86	24.60%	FOXO1;STAT5A;AGT;KLF15;PLIN2;EPAS1;SMAD3;NR2F1;EBF1;ASIP;FAS;TRIB3;WWTR1;CEBPD;PCK2;DVL1;CEBPB;FRZB;SP1;PTGIS;BMP1;RXRA;WNT5B;BMP2;IRS2;CNTFR;AHR;LMNA;STAT3;PPARG;NCOR2;NRIP1;PPARD;NAMPT;STAT5B	PVALBChC
902	GO_Biological_Process_2023__RNA Splicing, Via Transesterification Reactions With Bulged Adenosine As Nucleophile (GO:0000377)	-0.204785	-1.80688	0.00544959	0.134074	1	112/173	49.81%	U2AF1L4;WDR83;GEMIN7;HSPA8;SNU13;RBM42;DHX16;SNRPD2;LSM7;EIF4A3;SF3A1;DBR1;DDX41;SF3B5;PIN1;LSM4;ISY1;DDX39A;XAB2;LSM2;SNRPG;RNF113A;SF3B2;PHF5A;SRSF2;GPKOW;ESS2;HTATSF1;SNRPB;NCBP2;SRSF9;DDX23;CACTIN;SRSF8;LSM3;SF3B6;LSM6;PRPF31;U2AF2;RBMX2;SRSF3;CWC25;SART1;TFIP11;METTL3;SLU7;SNRNP35;GPATCH1;LSM5;SYF2;FRG1;CDC40;MAGOH;RBM8A;BCAS2;PRPF19;SF3A3;BUD31;SRSF7;PRPF38A;SNRPA1;IK;PRPF8;ZMAT2;SNRPB2;SNR…	PVALBChC
903	KEGG_2021_Human__Base excision repair	-0.342218	-1.80642	0.00631912	0.133737	1	23/30	45.66%	PARP4;POLE;POLE3;PARP3;FEN1;NTHL1;NEIL2;PCNA;MUTYH;UNG;MPG;SMUG1;NEIL1;XRCC1;POLE2;APEX1;PARP2;POLD2;LIG3;MBD4;PARP1;TDG;POLB	PVALBChC
904	GO_Cellular_Component_2023__Cell-Cell Junction (GO:0005911)	0.16687	1.80445	0	0.184885	0.999	56/213	16.80%	CDC42EP4;NDRG1;GJA1;SHROOM4;HEPACAM;NOTCH1;CNN3;SHROOM3;EZR;PERP;LDB3;CDH8;PKP2;KIRREL3;PDLIM5;OCLN;PARD3B;FLNA;CDH1;PLPP3;ARVCF;MSN;MYO1E;DSC2;CHAF1B;GAB1;CRB1;CDHR3;RAP2B;CDH26;MICALL2;CEACAM1;CDH13;CLIC4;PTPRU;SMAD7;TNKS1BP1;WTIP;JAM2;CDH3;CDH10;BAIAP2L2;JAM3;AHNAK;PTK7;ECT2;CDH4;CCDC85A;GJC1;LIMD1;BAIAP2;CTNNA1;WDR1;TEK;TMEM47;FLOT2	PVALBChC
905	GO_Cellular_Component_2023__Voltage-Gated Calcium Channel Complex (GO:0005891)	0.293544	1.80308	0.00561798	0.184038	0.999	19/33	33.06%	CACHD1;CACNA1I;SCN11A;CACNA1E;CACNA2D1;SCN5A;CACNA2D3;CATSPERE;SCN7A;CACNG8;CACNA1G;PDE4D;CACNA2D2;SCN3A;CACNB2;CACNA1C;CACNA1B;CACNA1A;CACNG3	PVALBChC
906	GO_Biological_Process_2023__Cell-Cell Adhesion Mediated By Cadherin (GO:0044331)	0.358567	1.80297	0.00824176	0.181938	0.999	13/21	32.15%	CDH8;CDH1;CDHR3;CDH26;CDH13;CDH3;CDH10;CDH4;CTNND1;MMP24;PLEKHA7;CDH9;CDH2	PVALBChC
907	KEGG_2021_Human__RNA transport	-0.212921	-1.80262	0.00404313	0.135419	1	100/151	49.84%	POP7;RPP25L;GEMIN7;PABPC1L;EIF3G;ELAC1;EIF1;EIF1B;POP4;EIF2B4;RPP25;AAAS;EIF4A3;RAN;POP5;EEF1A2;THOC3;EIF4E1B;SAP18;PABPC1L2A;NUP62;NXT1;SUMO2;EIF4A1;EIF1AY;EIF3I;EIF4A2;RPP40;RAE1;NUP210L;NCBP2;PRMT5;PYM1;EIF2B2;DDX19B;DDX20;EIF2B5;EIF3C;ELAC2;TACC3;EIF2S2;SUMO3;GLE1;EIF3D;STRAP;SEH1L;NUP37;EIF4G1;MAGOH;THOC5;EEF1A1;EIF2B1;RPP14;RBM8A;RPP38;NDC1;EIF1AX;DDX19A;RPP30;FXR2;RANGAP1;EIF4EBP2;SUMO1;EI…	PVALBChC
908	GO_Biological_Process_2023__Monoatomic Ion Transport (GO:0006811)	0.233738	1.8006	0.00296736	0.182572	0.999	25/63	21.92%	SLC26A4;TRPC6;SLC1A3;PKD1L3;GABRB1;SLC25A18;SLC26A3;CTNS;SLC24A1;TRPM3;SLC26A11;SLC15A2;CNGB3;TMEM63C;SLC9A5;AQP11;CHRNA7;SLC24A2;SLC8A2;SLC1A1;PANX1;SLC8B1;LASP1;SLC8A1;GRIN1	PVALBChC
909	GO_Molecular_Function_2023__Single-Stranded DNA Helicase Activity (GO:0017116)	0.407728	1.79843	0.00744417	0.182761	0.999	9/15	22.92%	HELB;MCM6;RAD51;RFC2;DNA2;RFC3;POLQ;MCM9;HELQ	PVALBChC
910	GO_Cellular_Component_2023__Cilium (GO:0005929)	0.165398	1.78798	0	0.187787	1	85/190	31.61%	CFAP300;TMEM216;WHRN;BBS1;FHDC1;DCDC2;MNS1;TTC30A;GPR83;BBS5;DNAH11;CFAP61;PDGFRA;SAXO1;RSPH1;GLI3;EVC;NPHP3;KIF17;CFAP91;ROPN1B;CFAP70;KIF7;TTLL3;RILPL2;DNAH2;CABYR;IFT22;TTLL1;IFT140;RSPH4A;UNC119B;TULP3;CCDC40;IQCG;PDZD7;TTLL9;TOGARAM2;GPR19;TTLL4;BBS2;CEP20;DNAH5;IFT46;DNAI7;PKD1L1;FUZ;CAMSAP3;CYS1;TCTN2;SEPTIN9;TMEM67;DNAI1;TBC1D30;TTC26;IFT52;NME5;FAM161A;GAS8;NPHP1;IQUB;FLCN;BBS4;KIF27;WDR…	PVALBChC
911	KEGG_2021_Human__Salmonella infection	-0.196176	-1.78737	0.00128866	0.148406	1	95/197	38.94%	NLRC4;TLR6;IKBKG;RILP;LEF1;PTPRC;ARPC3;FOS;MYL5;TUBA4A;PFN1;LY96;GAPDH;ARPC4;BRK1;MAPK12;BAX;FHOD1;STX10;RELA;TUBB2A;TUBA1B;TUBB4B;ANXA2;ARPC1B;DCTN3;CASP8;TUBB3;AHNAK2;TCF7;VPS18;HRAS;TUBA1A;JUN;TXN2;MYL12A;CYCS;DYNLT3;NFKBIA;TUBB4A;TUBB;IRAK4;DCTN1;ACTG1;TUBB2B;NOD1;MYL12B;ACTB;KLC2;DYNLL1;HSP90AB1;KLC1;DCTN6;RAB5C;IL18;ARPC5L;MAP2K3;ARF6;MAP2K7;ACTR1A;RHOG;CASP3;RAC1;HSP90AA1;MAPK3;ARPC1A;PFN2…	PVALBChC
912	GO_Biological_Process_2023__Protein Stabilization (GO:0050821)	-0.202417	-1.78576	0.00134409	0.148294	1	102/172	45.75%	PFDN6;TESC;PFN1;UXT;CALR;GAPDH;PPIB;RPS7;STUB1;CCT7;RPL17;PIN1;PHB2;RUVBL2;HSPA1A;PFDN5;PARK7;COA8;BAG1;PHB1;CDC37;CRYAB;MT3;VBP1;PIM2;PDCL3;RPL5;HSPA1B;PFDN2;PRKCD;PIH1D1;PEX19;CCT3;IGF1;HSP90AB1;WIZ;CCT5;GLMP;TAF9B;SYVN1;HIP1;NOP53;HCFC1;CCT6A;POLR2E;ZBED3;TRIM39;PINK1;RPL11;HSP90AA1;PEX6;CHP1;PFN2;DNAAF2;MUL1;WDR81;RABL3;PFDN1;LAMP1;CCT2;GTPBP4;ZSWIM7;HIP1R;GET1;DVL3;RASSF2;RUVBL1;TAF9;GOLGA7;…	PVALBChC
913	GO_Biological_Process_2023__Regulation Of Response To External Stimulus (GO:0032101)	0.222523	1.78524	0.00928793	0.186683	1	22/68	16.62%	ALOX5;HCK;DHX58;CGAS;NRG1;NLRP2;P2RX4;TNFSF4;NLRP1;PDGFRA;FOXP1;PTPN22;TRIM5;GRN;DAGLB;SPATA2;SETD6;SBNO2;AKNA;ADGRA2;IRF1;ADAMTS12	PVALBChC
914	KEGG_2021_Human__Protein processing in endoplasmic reticulum	-0.206559	-1.78523	0.00671141	0.147919	1	112/158	54.89%	PREB;CALR;SSR4;HSPA8;BAX;RNF5;DNAJB11;STUB1;ATF4;HSPA2;HSPA5;MOGS;ERP29;SEC61G;HSPA1A;DDIT3;DDOST;FBXO6;UBQLN4;BAG1;RAD23A;MAN1B1;CRYAB;DERL2;SSR2;PDIA4;RPN1;HSPA1B;SSR3;FBXO2;HSP90AB1;DNAJA2;HYOU1;SYVN1;DAD1;SEC24C;P4HB;UBXN1;DNAJC5;MAP2K7;XBP1;TRAM1L1;UBXN6;HSP90AA1;YOD1;HERPUD1;PPP1R15A;SELENOS;DNAJA1;BCL2;PRKCSH;DERL1;BCAP31;PDIA6;SEC61B;CKAP4;OS9;SEC62;HSPBP1;PDIA3;UBQLN2;LMAN2;UBE2D4;ATF6B;…	PVALBChC
915	GO_Biological_Process_2023__Internal Peptidyl-Lysine Acetylation (GO:0018393)	-0.328348	-1.78198	0.00921659	0.149381	1	26/36	48.03%	RUVBL2;ACTL6A;TAF6L;KAT5;TAF12;MRGBP;TAF10;TADA3;VPS72;YEATS4;DMAP1;RUVBL1;TAF9;TAF5L;BAG6;ATAT1;ING3;MORF4L2;KAT2A;MEAF6;KAT2B;MORF4L1;BRD8;TADA2A;KAT14;PHF20L1	PVALBChC
916	GO_Biological_Process_2023__ERBB Signaling Pathway (GO:0038127)	0.27147	1.77779	0.00867052	0.186201	1	10/41	8.38%	EFEMP1;MVP;BTC;EGFR;TGFA;SOX9;NRG1;PTK2B;GAB1;PLCE1	PVALBChC
917	WikiPathway_2023_Human__Ciliopathies WP4803	0.177306	1.77735	0.00421941	0.184639	1	65/152	29.75%	ZNF423;TMEM216;BBS1;AK7;DCDC2;POC1A;CFAP53;BBS5;DNAH11;DNAAF4;DRC1;MKS1;ODAD4;CFAP418;RSPH1;GLI3;HYDIN;GLIS2;EVC;NPHP3;DNAH6;TRIM32;KIF7;DDX59;IFT140;RSPH4A;CCDC40;BBS2;PKD1L1;TCTN2;NME9;XPNPEP3;TMEM67;B9D1;SUFU;DNAI1;CEP78;KATNIP;IFT52;FAM161A;GAS8;EFHC1;DNAL1;NPHP1;FLCN;BBS4;TCTN1;POMGNT1;POC1B;KIAA0753;WDR19;TBC1D32;RSPH3;LCA5;KIZ;IQCB1;CC2D2A;IFT122;IFT172;TMEM138;IFT43;CEP104;TUB;TTC8;NEK9	PVALBChC
918	GO_Cellular_Component_2023__Actin-Based Cell Projection (GO:0098858)	0.256131	1.77575	0.00589971	0.184368	1	17/49	16.19%	EZR;ANGPT1;MSN;MYO1E;MYO10;ACTA2;CLIC4;MYO1D;RAPGEF3;TBC1D10A;ACTN2;JAM3;RIPOR2;SCIMP;LCP1;PPP1R9B;TEK	PVALBChC
919	GO_Cellular_Component_2023__Clathrin-Coated Endocytic Vesicle (GO:0045334)	0.248386	1.76959	0.00928793	0.189131	1	13/47	9.55%	BTC;EGFR;CLTCL1;F3;SYT9;TGFA;LRP2;MYO1E;VAMP8;SFTPD;CFTR;ROR2;FZD4	PVALBChC
920	GO_Biological_Process_2023__Epidermal Growth Factor Receptor Signaling Pathway (GO:0007173)	0.296019	1.76854	0.00555556	0.188467	1	9/33	8.84%	EFEMP1;BTC;EGFR;TGFA;SOX9;PTK2B;GAB1;PLCE1;ERBB2	PVALBChC
921	KEGG_2021_Human__AGE-RAGE signaling pathway in diabetic complications	0.216872	1.76831	0.00940439	0.186803	1	17/74	8.38%	COL4A4;FOXO1;TGFBR2;STAT5A;PLCG2;NOX4;AGT;F3;SMAD3;TGFB3;VEGFD;MAPK11;MAPK13;COL4A3;NRAS;PLCE1;PLCD4	PVALBChC
922	GO_Biological_Process_2023__Positive Regulation Of Monoatomic Ion Transport (GO:0043270)	0.322679	1.76601	0.00259067	0.18759	1	15/25	32.53%	TRPC6;WFS1;PKP2;CRACR2A;SCN5A;P2RX4;SCN3B;P2RX7;DLG1;CACNB2;STIM2;WNK3;FHL1;ANK3;CAMK2A	PVALBChC
923	GO_Biological_Process_2023__Regulation Of Protein Kinase B Signaling (GO:0051896)	-0.237551	-1.76394	0.0074184	0.161544	1	41/88	31.05%	PHLDA3;RCAN3;HPSE;CIB1;MYORG;TGFB1;CASS4;HAX1;RACK1;DDIT3;PARK7;HBEGF;C1QBP;PHB1;MAZ;FGFR1;FGF2;P2RY12;SPRY2;F7;IGF1;TSPYL5;HSP90AB1;IL18;AIM2;HIP1;NOP53;PPP2CA;PINK1;PDGFA;HSP90AA1;INPP5K;RNF41;PIK3CD;MUL1;MYDGF;CX3CL1;SRC;TXN;SORD;RET	PVALBChC
924	GO_Biological_Process_2023__Golgi Vesicle Transport (GO:0048193)	-0.198475	-1.74622	0.00135318	0.174916	1	137/177	59.73%	COPE;PREB;IER3IP1;TRAPPC2L;ARF5;ARF3;TRAPPC1;YIF1A;RAB6D;STX10;PEF1;USE1;TRAPPC2B;COPZ1;KDELR3;TRAPPC4;COG8;SCAMP3;BCAP29;RANGRF;TRAPPC6A;TRAPPC5;TEX261;TMED2;SNX12;BNIP1;TMEM115;RAB8A;AP4M1;GABARAPL2;TMED4;TMED9;HYOU1;SCAMP2;SEC24C;KDELR2;STEEP1;YKT6;TRAPPC3;RBSN;BICD2;COPG1;RP2;RAB29;KIF1C;RER1;BCAP31;ZW10;VTI1B;TMED5;KDELR1;TMED3;SURF4;NRBP1;TMED7;YIF1B;LMAN2;TRAPPC13;YIPF5;ATL3;STX5;ARF4;MPPE…	PVALBChC
925	GO_Biological_Process_2023__Endoplasmic Reticulum To Golgi Vesicle-Mediated Transport (GO:0006888)	-0.225291	-1.73518	0.00550964	0.179937	1	76/102	55.62%	COPE;PREB;IER3IP1;TRAPPC2L;TRAPPC1;YIF1A;PEF1;USE1;TRAPPC2B;KDELR3;TRAPPC4;BCAP29;RANGRF;TRAPPC6A;TRAPPC5;TEX261;TMED2;TMED4;TMED9;HYOU1;SEC24C;KDELR2;STEEP1;YKT6;TRAPPC3;COPG1;RAB29;BCAP31;ZW10;TMED5;KDELR1;TMED3;NRBP1;TMED7;YIF1B;LMAN2;TRAPPC13;YIPF5;ATL3;STX5;ARF4;MPPE1;COG3;SEC22B;GOLGA2;TMED10;CNIH4;COPB1;COPA;TBC1D20;LMAN1;GOPC;SEC13;SAR1A;MIA3;SAR1B;COPB2;YIPF4;SEC24A;TFG;MIA2;RAB1A;PGAP1;…	PVALBChC
926	GO_Molecular_Function_2023__DNA-binding Transcription Repressor Activity, RNA Polymerase II-specific (GO:0001227)	0.162687	1.70756	0	0.215774	1	72/170	29.54%	PRDM16;ETS2;FOXP4;HEY1;ATF3;MAFK;ZNF77;SNAI2;KLF8;HESX1;REST;GLIS3;ELK3;ZNF19;ZNF764;NR2F1;ZNF79;ZNF239;OVOL2;ZNF436;ZNF350;ZNF266;ZNF3;NFIL3;ZBTB46;TCF3;ZNF439;CEBPB;ZNF85;FOXP1;ZBTB32;ZNF550;PRDM1;ZNF599;ERF;ZNF587B;ZNF749;CC2D1A;ZNF404;ZFP69B;ZNF512B;ZNF674;ZBTB5;ZNF93;HSF1;SP2;ZNF785;ZNF559;MNT;ZNF124;ZBTB4;ZNF398;ZNF669;TCFL5;ZFP37;ZNF692;ZNF555;DEAF1;PPARD;POU6F1;NFATC3;ZNF891;ZNF589;YY1;ZN…	PVALBChC
927	WikiPathway_2023_Human__Ectoderm Differentiation WP2858	0.186814	1.70755	0	0.214	1	51/111	32.77%	TBL1X;ZFHX4;RGMA;EDA;TCF7L1;CDH8;ELOVL2;SOCS2;HESX1;FHL2;ARHGAP15;FGFR2;KIFC3;PTPRB;MKS1;ROR2;RHPN1;FZD4;TCF3;BOC;GLI3;LDB2;ABCC4;ARHGAP10;SGSM3;SCHIP1;SOX2;POU2F2;BAZ1A;PAN2;TOX3;NF2;NLGN1;RRBP1;BCOR;CTBP1;PPARD;ARX;PRKAG2;CDON;SERPINB6;PGM1;DMD;OGT;NUMA1;TRPM2;PI4KA;MECP2;WDR44;ZBTB16;TTC14	PVALBChC
928	GO_Biological_Process_2023__Cell Junction Assembly (GO:0034329)	0.210807	1.70533	0.00619195	0.214589	1	22/73	17.35%	PCDHB6;CDH8;PKP2;ITGA6;KIRREL3;DSCAM;CDH1;ARVCF;SLITRK1;PCDHB2;CDHR3;CDH26;CDH13;PCDHB4;CDH3;CDH10;CDH4;PCDHB16;GJC1;FN1;NLGN3;CTNND1	PVALBChC
929	KEGG_2021_Human__Kaposi sarcoma-associated herpesvirus infection	-0.207351	-1.69402	0.00962861	0.220405	1	56/127	33.18%	IKBKG;LEF1;FOS;IRF9;GNG3;TP53;PREX1;MAPK12;C3;BAX;RELA;RPS27A;SYK;UBA52;PPP3R2;CASP8;CALM2;TCF7;GABARAP;HRAS;GNB2;RCAN1;JUN;LYN;TICAM1;CYCS;HLA-C;UBC;PIK3R2;GNB3;NFKBIA;FGF2;IRF3;UBB;CDK4;VEGFA;GABARAPL2;HLA-A;GABARAPL1;BECN1;CALM3;MAP2K7;CASP3;STAT1;RAC1;PIK3R3;MAPK3;PIK3CD;SRC;CALM1;ATG3;ANGPT2;AKT1;PLCG1;PTGS2;STAT2	PVALBChC
930	GO_Cellular_Component_2023__Secretory Granule Lumen (GO:0034774)	-0.188804	-1.68745	0.00516129	0.227304	1	94/201	34.99%	VEGFC;APRT;HPSE;POMC;ECM1;NAPRT;SRGN;IMPDH2;TRAPPC1;HSPA8;C3;PRDX4;TUBB2A;PCSK1;TUBB4B;SPARC;TGFB1;ANXA2;PGLYRP1;SELENOP;DSN1;F5;PPIA;GSTP1;ALDOC;SRP14;SGCG;CAT;CSNK2B;PTGES2;CSTB;GLA;TMSB4X;CTSD;FUCA2;FERMT3;NPC2;ARSA;MAGED2;GM2A;TEX264;QPCT;VEGFA;PRKCD;FABP5;CTSH;IGF1;HSP90AB1;PA2G4;B2M;GGH;PSMD2;PSMC3;GTPBP2;FTL;ILF2;PGAM1;PDGFA;ACAA1;HSP90AA1;SERPINB1;PKM;NIT2;CTSZ;GUSB;EEF2;PSMD13;VEGFB;ALAD…	PVALBChC
931	GO_Biological_Process_2023__Negative Regulation Of Wnt Signaling Pathway (GO:0030178)	0.181591	1.68339	0.00740741	0.224108	1	32/98	19.87%	APCDD1;LRP4;IGFBP4;KREMEN1;SNAI2;GREM1;TMEM88B;SOX9;WWTR1;ZNRF3;PTPRU;GLI3;FRZB;NPHP3;BICC1;SHISA6;STK11;AMER1;FZD6;LIMD1;BMP2;NXN;TCF7L2;SOX2;ANKRD6;CTNNBIP1;MAD2L2;CTNND1;LMBR1L;CBY1;FUZ;CXXC4	PVALBChC
932	WikiPathway_2023_Human__Alzheimer 39 S Disease And miRNA Effects WP2059	-0.181776	-1.68135	0.0025974	0.229175	1	83/202	33.31%	PSENEN;SLC25A5;PSMB4;CDK5;FZD8;APOE;DVL2;TUBA4A;ARAF;PSMB6;GAPDH;HSD17B10;RELA;TUBB2A;TUBA1B;TUBB4B;DKK2;GRIN2A;ATG101;PPP3R2;PSMC4;CASP8;TUBB3;ATP2A1;ADRM1;CALM2;HRAS;ATF4;CSNK2B;TUBA1A;PSMB5;APH1A;PSMD8;CYCS;PSMC5;DDIT3;PIK3R2;ATG2A;SLC25A4;PSMA7;TUBB4A;TUBB;PPIF;PSEN2;APC2;TUBB2B;SFRP4;AXIN2;SNCA;RYR3;PSMB3;KLC2;KLC1;PSMD2;PSMC3;BECN1;CALM3;MAP2K7;VDAC2;XBP1;CASP3;PIK3R3;MAPK3;PSMD13;VDAC1;NCS…	PVALBChC
933	WikiPathway_2023_Human__Alzheimer 39 S Disease WP5124	-0.181776	-1.68135	0.0025974	0.229175	1	83/202	33.31%	PSENEN;SLC25A5;PSMB4;CDK5;FZD8;APOE;DVL2;TUBA4A;ARAF;PSMB6;GAPDH;HSD17B10;RELA;TUBB2A;TUBA1B;TUBB4B;DKK2;GRIN2A;ATG101;PPP3R2;PSMC4;CASP8;TUBB3;ATP2A1;ADRM1;CALM2;HRAS;ATF4;CSNK2B;TUBA1A;PSMB5;APH1A;PSMD8;CYCS;PSMC5;DDIT3;PIK3R2;ATG2A;SLC25A4;PSMA7;TUBB4A;TUBB;PPIF;PSEN2;APC2;TUBB2B;SFRP4;AXIN2;SNCA;RYR3;PSMB3;KLC2;KLC1;PSMD2;PSMC3;BECN1;CALM3;MAP2K7;VDAC2;XBP1;CASP3;PIK3R3;MAPK3;PSMD13;VDAC1;NCS…	PVALBChC
934	GO_Biological_Process_2023__Positive Regulation Of Cell Projection Organization (GO:0031346)	0.18311	1.67814	0.00749064	0.225371	1	20/99	9.89%	DPYSL3;MUSK;CUX2;ITGA6;CHODL;ROR1;ROBO1;CARMIL1;PLK5;SLITRK1;RIT2;DDR2;PTK2B;PTN;CUL7;ROR2;PLXNA3;FZD4;NEDD9;DVL1	PVALBChC
935	GO_Biological_Process_2023__Positive Regulation Of Intracellular Signal Transduction (GO:1902533)	-0.165598	-1.66879	0.00504414	0.241349	1	100/343	20.50%	SLC35B2;MAP4K1;TLR6;IKBKG;LAMTOR2;HPSE;POMC;PTPRC;SEMA3E;LPAR1;RRAGA;ECM1;SPHK1;ADRA1B;TP53;FLT3;GAPDH;GPR37L1;EPHA8;BCL10;BAX;MYORG;RELA;CDK5RAP3;LGALS1;TGFB1;FIS1;LAMTOR5;GPR37;C1QTNF4;CASS4;HAX1;JCAD;SHC1;IGFBP6;PPIA;CASP8;PLXNB1;RELN;RBPMS;HRAS;RPL17;ERBB3;RPS15;HTR2B;JMJD8;TMEM106A;S100A13;GPR61;RACK1;LYN;PHB2;TCIM;FGF1;TICAM1;MLST8;NUP62;DDIT3;TMEM9B;RFPL2;AVPI1;PDGFD;PARK7;MIB2;TRAF7;SOD1;…	PVALBChC
936	GO_Biological_Process_2023__Regulation Of Apoptotic Process (GO:0042981)	-0.156216	-1.66825	0.00236686	0.240993	1	193/495	31.94%	MIEN1;PRELID1;NLRC4;PHLDA3;LEF1;IER3IP1;HIGD2A;TFPT;PRDX5;CDK5;SMPD1;PRDX2;RTKN;CIB1;PNMA1;AKT1S1;VIP;SPHK1;ARAF;CALR;SCX;TP53;FLT3;EEF1E1;NOL3;RPS6KA1;RPS3A;BCL10;PRR7;BAX;BEX1;RELA;SFRP2;FBXO10;HIGD1A;LGALS1;STPG1;CITED2;TMBIM4;SCRIB;HAX1;HPN;SHC1;PPIA;GSTP1;DHCR24;PHLDA1;NTF3;CASP8;RPL10;GADD45B;ERBB3;ATF4;SAP18;HTRA2;HSPA5;HTR2B;CAT;PLK3;JUN;ARHGDIA;RACK1;PHB2;TCIM;PIDD1;RUVBL2;IFI6;ACTL6A;ST…	PVALBChC
937	KEGG_2021_Human__Hippo signaling pathway	0.174949	1.66123	0.00334448	0.234688	1	31/112	15.93%	YAP1;TGFBR2;BMPR1B;TCF7L1;SNAI2;SMAD3;CDH1;TPTEP2-CSNK1E;TGFB3;CRB1;WWTR1;ID2;SMAD7;FZD4;RASSF1;DVL1;WTIP;AMH;WNT3;DCHS2;CCND3;FZD6;FAT4;LIMD1;WNT5B;BMP2;WNT16;TCF7L2;SOX2;TP53BP2;CTNNA1	PVALBChC
938	GO_Biological_Process_2023__Negative Regulation Of Cell Differentiation (GO:0045596)	0.164181	1.63053	0.00387597	0.25419	1	42/146	17.70%	YAP1;FOXO1;EFEMP1;EGFR;HEY1;NOTCH1;SOX4;MEIS2;SNAI2;LRP5;PKP2;REST;RANBP3L;GREM1;SMAD3;ESRRB;SOX9;PTK2B;NR1H2;ADGRV1;TRIB3;OVOL2;WWTR1;ID2;SMAD7;PTBP1;SEMA4D;NPHP3;USH2A;LRP3;RUNX1T1;COL5A2;CRIM1;COL5A1;ENPP1;LIMD1;BMP2;SOX2;ADAMTS12;MAD2L2;BCL7C;METTL14	PVALBChC
939	KEGG_2021_Human__Herpes simplex virus 1 infection	0.128996	1.6206	0	0.254686	1	162/382	29.87%	ZNF285;ZNF700;SP100;ZNF98;HLA-B;ZNF77;ZNF221;ZNF670;ZNF761;ZNF713;ZNF607;CGAS;ZNF841;ZNF19;ZNF418;ZNF547;ZNF764;ZNF836;IFIH1;FAS;ZNF79;ZNF853;ZNF17;ZNF257;ZNF727;ZNF354A;ZNF436;ZNF350;ZSCAN32;ZNF3;ZNF157;BID;ZNF304;ZNF208;ZNF860;ZNF439;ZNF181;BAK1;ZNF701;IRAK1;ZNF454;ZNF85;ZNF610;ZNF534;ZNF662;ZNF550;ZNF74;ZNF182;ZNF101;ZNF225;ZNF200;ZNF599;HLA-DMA;TYK2;ZNF570;ZNF630;ZNF112;ZNF621;ZNF136;ZNF777;Z…	PVALBChC
940	GO_Biological_Process_2023__Negative Regulation Of Apoptotic Process (GO:0043066)	-0.15967	-1.57367	0.0075	0.32467	1	120/322	29.45%	MIEN1;PRELID1;QARS1;LEF1;SEMA3E;HIGD2A;PRDX5;NR4A2;PRDX2;BDNF;CIB1;APOE;VIP;SPHK1;ARAF;SCX;MAG;TP53;NOL3;RPS6KA1;RPS3A;RELA;HIGD1A;ITGA5;CITED2;TMBIM4;LAMTOR5;HAX1;HPN;SHC1;CDKN2D;GSTP1;DHCR24;NTF3;RPL10;TMBIM1;ERBB3;HSPA5;HTR2B;CAT;PLK3;ARHGDIA;PHB2;TCIM;PIDD1;IFI6;HSPA1A;MLST8;NUP62;IL7;ZNF830;PARK7;SOX8;SOD1;STIL;BAG1;PIM3;MAZ;PPIF;PSEN2;COPS5;SET;FXN;CRYAB;FSTL1;SNCA;MT3;PIM2;SPRY2;ATF5;BNIP1…	PVALBChC
941	GO_Cellular_Component_2023__Cell-Substrate Junction (GO:0030055)	-0.150675	-1.52911	0.00618047	0.362289	1	109/323	27.25%	ITGBL1;RPL8;PTPRC;ARPC3;CD9;AIF1L;ITGA2;ARL2;RPL3;PFN1;CALR;RPL7A;RPLP0;RPS17;DPP4;HSPA8;RPL7;RPS3A;RPL27;RPS10;TMEM98;RPL18;SPRY4;RPL9;CORO1B;RPS16;RPL38;RPL19;ITGA5;PPIB;RPS13;ARPC1B;CASS4;PPIA;RPS7;RPS18;RPL10A;ALKBH6;RPLP1;RPS2;ARMC5;MCAM;ITGB5;RPL17;RPS9;RPLP2;RPS15;HSPA5;GNB2;CAT;CSRP1;RND3;TSPAN4;RPL13A;RPS11;NELL1;HSPA1A;RPS14;FERMT3;RPS5;ARHGAP22;HMCN1;ADGRE5;PROCR;CD81;ILK;PXN;ACTG1;RPS…	PVALBChC
942	GO_Cellular_Component_2023__Focal Adhesion (GO:0005925)	-0.148079	-1.49984	0.00986436	0.390585	1	107/319	27.25%	ITGBL1;RPL8;PTPRC;ARPC3;CD9;AIF1L;ITGA2;ARL2;RPL3;PFN1;CALR;RPL7A;RPLP0;RPS17;DPP4;HSPA8;RPL7;RPS3A;RPL27;RPS10;TMEM98;RPL18;SPRY4;RPL9;CORO1B;RPS16;RPL38;RPL19;ITGA5;PPIB;RPS13;ARPC1B;CASS4;PPIA;RPS7;RPS18;RPL10A;ALKBH6;RPLP1;RPS2;ARMC5;MCAM;ITGB5;RPL17;RPS9;RPLP2;RPS15;HSPA5;GNB2;CAT;CSRP1;RND3;TSPAN4;RPL13A;RPS11;NELL1;HSPA1A;RPS14;RPS5;ARHGAP22;ADGRE5;PROCR;CD81;ILK;PXN;ACTG1;RPS4X;THY1;RPL5;…	PVALBChC
943	GO_Biological_Process_2023__Cytoplasmic Translation (GO:0002181)	-0.561427	-3.25783	0	0	0	30/33	36.43%	RPL8;RPL34;RPL13A;RPL13;RPL15;RPS27A;RPS3A;SARS1;RPL32;RPL28;EIF4A2;RPL5;RPL6;RPLP1;UBA52;RPSA;RPS14;RPS8;RPL31;RPS29;ETF1;RPS20;RPS9;RPL14;ZC3H15;RPS24;EIF3M;RPL41;RPL37;RPL37A	SSTHGF
944	KEGG_2021_Human__Ribosome	-0.529298	-3.17425	0	0	0	33/36	40.24%	RPL8;RPL34;RPL13A;RPL13;RPL15;RPS27A;RPL23;RPS27L;RPS3A;RPL32;RPL28;RPL5;RPL6;RPLP1;UBA52;RPSA;RPS14;RPS8;RPL31;RPS29;MRPL3;RPS20;MRPL33;RPS9;RPL14;RPS24;RPL41;MRPS9;RPL37;RPL37A;MRPL19;RPS3;RPS12	SSTHGF
945	GO_Biological_Process_2023__Peptide Biosynthetic Process (GO:0043043)	-0.495037	-3.11827	0	0	0	35/42	36.43%	RPL8;RPL34;RPL13A;RPL13;RPL15;RPS27A;HARS1;RPS3A;EEF1A2;SARS1;RPL32;RPL28;RPL5;MRRF;RPL6;RPLP1;RPSA;RPS14;RPS8;RPL31;RPS29;MRPL3;RPS20;RPS9;RPL14;DARS1;DMD;HBS1L;RPS24;GGT7;EEF1A1;RPL41;RPL37;AGO2;RPL37A	SSTHGF
946	GO_Biological_Process_2023__Modulation Of Chemical Synaptic Transmission (GO:0050804)	0.295611	3.07141	0	0	0	54/72	40.26%	NLGN4Y;CDH2;CLSTN2;DLGAP3;LRRK2;BCR;GRIK5;OPHN1;LRRC4C;GRID2;GRM1;PXK;DLGAP1;DLGAP2;GRIA1;GRIK3;SYN3;SLC8A3;GRIK2;GRIA4;GRIA3;GRID1;CACNA1A;MCTP1;NRG3;SYT1;CACNA1B;TMEM108;GRM5;BTBD9;TRIO;GRIA2;RIMS2;DGKI;RIMS1;MEF2C;PPP3CA;NLGN4X;APP;PLPPR4;NLGN1;GRM7;GSK3B;PTEN;FXR1;CLSTN1;LGI1;AKAP9;UNC13A;DGKZ;CASK;GRIK1;DLGAP4;CPLX1	SSTHGF
947	GO_Cellular_Component_2023__Postsynaptic Density (GO:0014069)	0.248737	3.04982	0	0.000524312	0.001	60/97	31.00%	SHANK3;CDH2;SHISA6;ADGRL1;IQSEC3;GRIK5;CRIPT;SHANK2;CACNG7;DTNBP1;CACNG3;GRID2;GRM1;SLC8A1;ADD2;GRIA1;KCND3;GRIK3;NOS1;SLC8A3;SPOCK1;GRIK2;CACNA1C;SRGAP3;FYN;MAGI2;GRIA4;ADCY8;GRIA3;GRID1;NTRK2;DLG2;NETO1;KCND2;ATP2B2;TMEM108;GRM5;DNM3;SHISA9;CTNND2;GRIN2B;KALRN;DLG1;GRIA2;RTN3;GPHN;LRRC7;DTNB;PLPPR4;INPP4A;ARHGAP32;NLGN1;PPP1R9A;RTN4;FXR1;RTN1;ARHGAP44;ADD3;SIPA1L1;SRCIN1	SSTHGF
948	MSigDB_Hallmark_2020__Myc Targets V1	-0.379479	-3.02442	0	0	0	61/81	41.78%	VDAC1;RPL34;CANX;PTGES3;SLC25A3;SSB;SRSF3;PSMB2;GOT2;HNRNPR;YWHAQ;COX5A;CBX3;VDAC3;DEK;RPL6;GLO1;HSP90AB1;CNBP;SRSF7;PPIA;PSMC6;AP3S1;PGK1;STARD7;PPM1G;SNRPA1;CCT3;PABPC1;ETF1;NPM1;TXNL4A;TARDBP;EIF4G2;TFDP1;UBA2;PSMA1;HNRNPD;DHX15;HSPD1;KPNB1;RPL14;RNPS1;G3BP1;IARS1;HPRT1;EIF3J;YWHAE;EIF1AX;EXOSC7;CCT4;FAM120A;XPOT;XPO1;TOMM70;HNRNPA3;TRA2B;RPS3;SRSF1;NAP1L1;EPRS1	SSTHGF
949	KEGG_2021_Human__Parkinson disease	-0.350246	-2.94716	0	0.000196286	0.001	55/94	30.22%	UQCRB;CAMK2B;PSMD13;VDAC1;UQCRH;COX7C;PSMD12;UBC;PSMB1;COX7A2;RPS27A;UBA1;TUBB;EIF2AK3;PSMB2;CALM2;ITPR2;PSMC2;PARK7;VDAC2;COX7A2L;COX5A;PRKACA;NDUFA12;COX4I1;CALM3;NDUFV1;CAMK2A;NDUFA5;VDAC3;KLC1;ATP5F1A;MAP3K5;NDUFS5;UBA52;TUBA1B;NDUFC1;PSMC6;UCHL1;PSMB7;CALM1;PSMD11;SEM1;ITPR1;UQCRC2;TUBA1A;NDUFS4;PSMA1;ATP5F1B;COX5B;SDHC;KIF5B;COX6B1;KIF5A;CAMK2G	SSTHGF
950	KEGG_2021_Human__Prion disease	-0.34223	-2.91571	0	0.000163572	0.001	61/96	37.15%	UQCRB;PSMD13;VDAC1;UQCRH;COX7C;PSMD12;CREB5;CSNK2A2;PSMB1;COX7A2;TUBB;EIF2AK3;PSMB2;ITPR2;PSMC2;HSPA8;VDAC2;PRNP;COX7A2L;COX5A;PRKACA;NDUFA12;COX4I1;NDUFV1;NDUFA5;VDAC3;KLC1;ATP5F1A;NDUFS5;GRIN3A;PIK3R1;MAPK1;TUBA1B;NDUFC1;LAMC1;PSMC6;GRIN2A;PPP3CB;SOD1;PSMB7;PSMD11;SEM1;ITPR1;UQCRC2;TUBA1A;NDUFS4;PSMA1;ATP5F1B;RYR1;COX5B;SDHC;KIF5B;COX6B1;KIF5A;NDUFV3;PPP3CC;CYCS;UQCRC1;MCU;GRIN1;ATP5MC2	SSTHGF
951	GO_Biological_Process_2023__Nervous System Development (GO:0007399)	0.19347	2.90782	0	0.00139817	0.004	117/162	46.94%	SHANK3;TRPC5;CDH2;SEMA6A;FLRT3;CDON;CDK5RAP2;SZT2;NRXN2;EPHB1;ROBO2;FGF13;ACVR1B;FGF2;CHRM3;OPHN1;BTBD1;SHANK2;SH3GL2;EVL;RPS6KA6;BRINP3;ZBTB16;WWP1;RBFOX1;ERBB4;MTR;SPOCK1;RBFOX3;SEMA5A;DSCAML1;NFASC;LSAMP;RYK;ADGRL3;ASIC2;SRRM4;ARNT2;NAV3;PLPPR1;MBD5;TENM1;GPM6A;ZEB2;DNM3;FGF14;FGF12;KALRN;MYT1L;NAV2;FBXL17;MDGA2;AHI1;WDPCP;ATXN1;DCLK1;SERPINI1;SPTBN1;PRKN;NRCAM;APC;RBFOX2;MEF2C;APP;SCN2A;ARHGA…	SSTHGF
952	GO_Biological_Process_2023__Synapse Organization (GO:0050808)	0.288389	2.87318	0	0.00157294	0.006	41/62	31.27%	SHANK3;CDH2;FLRT3;NEDD4;UNC13C;NRXN2;LRRK2;ARHGAP39;PDZRN3;PPFIA1;SHANK2;LRRC4C;PTPRF;LRRC4B;SLC8A3;SLC6A1;SNCA;RYK;ADGRL3;LRFN5;PPFIA2;GPM6A;GRM5;DNM3;CTNND2;ANK3;NRCAM;GPHN;CACNB4;APBB2;NLGN4X;APP;DSCAM;MAPT;NLGN1;PAK3;DNER;PTEN;CACNB2;FARP1;NRXN1	SSTHGF
953	WikiPathway_2023_Human__Cytoplasmic Ribosomal Proteins WP477	-0.484325	-2.84034	0	0.000140204	0.001	30/34	42.73%	RPL8;RPL34;RPL13A;RPL13;RPL15;RPS27A;RPL23;RPS3A;RPL32;RPL28;RPL5;RPL6;RPLP1;UBA52;RPSA;RPS14;RPS8;RPL31;RPS29;RPS20;RPS9;RPL14;RPS24;RPL41;RPL37;RPL37A;MRPL19;RPS3;RPS12;RPL11	SSTHGF
954	GO_Biological_Process_2023__Translation (GO:0006412)	-0.379467	-2.83073	0	0.000122679	0.001	51/69	39.17%	RPL8;RPL34;RPL13A;RPL13;RPL15;RPS27A;HARS1;RPS3A;EEF1A2;SARS1;RPL32;GARS1;RPL28;EEF2K;RPL5;MRRF;RPL6;RPLP1;UBA52;PTCD3;RPSA;WARS2;RPS14;RPS8;RPL31;RPS29;ETF1;MRPL3;RPS20;MARS1;MRPL33;RPS9;RPL14;DAP3;IARS1;ZC3H15;DARS1;HBS1L;RPS24;EEF1A1;RPL41;MRPS9;RARS2;RPL37;GFM2;AGO2;RPL37A;IARS2;FASTKD2;MRPL19;RPS3	SSTHGF
955	GO_Biological_Process_2023__Macromolecule Biosynthetic Process (GO:0009059)	-0.430047	-2.82922	0	0.000109048	0.001	36/48	36.43%	RPL8;RPL34;RPL13A;RPL13;RPL15;RPS27A;HARS1;RPS3A;EEF1A2;SARS1;RPL32;RPL28;EEF2K;RPL5;MRRF;RPL6;RPLP1;RPSA;RPS14;RPS8;RPL31;RPS29;MRPL3;RPS20;EIF4G2;RPS9;RPL14;DARS1;HBS1L;RPS24;EEF1A1;RPL41;B4GALT5;RPL37;AGO2;RPL37A	SSTHGF
956	MSigDB_Hallmark_2020__mTORC1 Signaling	-0.348996	-2.81118	0	9.81431e-05	0.001	51/78	35.78%	PSMD13;ATP6V1D;CANX;PSMD12;BCAT1;GAPDH;ME1;PSMC2;ENO1;TFRC;CCT6A;PPA1;ACTR3;GTF2H1;SSR1;NMT1;PITPNB;TXNRD1;ELOVL5;CYB5B;HSP90B1;STARD4;PPIA;TBK1;PSMC6;PGK1;IMMT;UCHL5;MTHFD2L;HMGCR;UFM1;NFYC;ETF1;SKAP2;P4HA1;POLR3G;ACTR2;HSPD1;SERP1;GBE1;USO1;PLOD2;RAB1A;HPRT1;GOT1;GSR;HSPA9;ATP2A2;SEC11A;SLC1A4;GMPS	SSTHGF
957	GO_Biological_Process_2023__Cell Junction Assembly (GO:0034329)	0.367372	2.77908	0	0.00356532	0.016	28/38	31.27%	SHANK3;CDH8;CDH2;FLRT3;CDH4;CDH13;NRXN2;OPHN1;SHANK2;VMP1;CDH18;TLN2;RYK;CDH9;MYO9A;ADGRL3;GPM6A;DNM3;CTNND2;NRCAM;TJP1;DSCAM;NLGN1;DNER;PTEN;PKP4;FARP1;NRXN1	SSTHGF
958	GO_Biological_Process_2023__Regulation Of Trans-Synaptic Signaling (GO:0099177)	0.430215	2.759	0	0.0029711	0.016	20/27	26.11%	NLGN4Y;BCR;GRIK5;LRRC4C;GRID2;PXK;GRIA1;GRIK3;GRIK2;GRIA4;GRIA3;GRID1;CACNA1A;NRG3;CACNA1B;BTBD9;GRIA2;PPP3CA;NLGN4X;NLGN1	SSTHGF
959	GO_Cellular_Component_2023__Asymmetric Synapse (GO:0032279)	0.246131	2.73633	0	0.00329568	0.021	50/81	31.00%	SHANK3;NLGN4Y;CDH2;SHISA6;ADGRL1;ARFGEF2;IQSEC3;CRIPT;SHANK2;DTNBP1;SLC8A1;ADD2;GRIA1;KCND3;NOS1;SLC8A3;SPOCK1;CACNA1C;SRGAP3;FYN;MAGI2;ADCY8;NTRK2;DLG2;NETO1;KCND2;TMEM108;DNM3;SHISA9;CTNND2;GRIN2B;KALRN;GRIA2;RTN3;GPHN;LRRC7;NLGN4X;DTNB;INPP4A;ARHGAP32;NLGN1;GRM7;PPP1R9A;RTN4;FXR1;RTN1;ARHGAP44;ADD3;SIPA1L1;SRCIN1	SSTHGF
960	MSigDB_Hallmark_2020__Oxidative Phosphorylation	-0.320174	-2.61493	0	0.00115987	0.012	58/84	42.37%	UQCRB;VDAC1;UQCRH;ATP6V1D;IDH3A;COX7C;ATP6V1F;SLC25A3;ATP6V1E1;SUPV3L1;COX7A2;FDX1;POLR2F;ATP6V1C1;GOT2;ETFA;VDAC2;DECR1;COX7A2L;COX5A;MTRR;COX11;COX4I1;NDUFV1;NDUFA5;VDAC3;DLD;ATP5F1A;NDUFC1;PDP1;IMMT;ATP6V0B;MPC1;ATP5MG;GLUD1;HADHA;UQCRC2;ETFDH;LRPPRC;NDUFS4;ATP5F1B;DLAT;COX5B;SDHC;COX6B1;HSPA9;NQO2;CYCS;UQCRC1;ACAT1;TOMM70;AIFM1;ATP5MC2;AFG3L2;COX10;ACO2;ACADM;TIMM9	SSTHGF
961	GO_Cellular_Component_2023__Ficolin-1-Rich Granule Lumen (GO:1904813)	-0.4001	-2.60646	0	0.001145	0.013	30/44	34.01%	PSMD13;PSMD12;PKM;PSMB1;SRP14;PAFAH1B2;PSMC2;HSPA8;VCP;HSP90AB1;PGAM1;MAPK1;PPIA;DDX3X;DBNL;PSMB7;ASAH1;YPEL5;PSMD11;CTSB;HSP90AA1;CAB39;KCMF1;ACTR2;KPNB1;FTH1;TIMP2;EEF1A1;VCL;CCT8	SSTHGF
962	GO_Cellular_Component_2023__Large Ribosomal Subunit (GO:0015934)	-0.588044	-2.59623	0	0.00112164	0.015	16/17	36.43%	RPL8;RPL34;RPL13A;RPL13;RPL15;RPL32;RPL28;RPL5;RPL6;RPLP1;UBA52;RPL31;RPL14;RPL41;RPL37;RPL37A	SSTHGF
963	GO_Cellular_Component_2023__Cytosolic Large Ribosomal Subunit (GO:0022625)	-0.588044	-2.59623	0	0.00112164	0.015	16/17	36.43%	RPL8;RPL34;RPL13A;RPL13;RPL15;RPL32;RPL28;RPL5;RPL6;RPLP1;UBA52;RPL31;RPL14;RPL41;RPL37;RPL37A	SSTHGF
964	GO_Biological_Process_2023__Synapse Assembly (GO:0007416)	0.368419	2.58495	0	0.0053742	0.036	24/33	31.27%	SHANK3;NLGN4Y;CDH2;FLRT3;NRXN2;FGF13;SHANK2;GRID2;SRGAP3;RYK;GABRA2;ADGRL3;GPM6A;DNM3;NRCAM;GABRB3;NLGN4X;DSCAM;NLGN1;GABRB2;DNER;PTEN;FARP1;NRXN1	SSTHGF
965	GO_Cellular_Component_2023__Ficolin-1-Rich Granule (GO:0101002)	-0.348039	-2.49341	0	0.00399115	0.052	36/60	32.13%	PSMD13;DYNLL1;PSMD12;PKM;PSMB1;LAMP2;SRP14;PAFAH1B2;PSMC2;HSPA8;VCP;DYNC1LI1;HSP90AB1;PGAM1;MAPK1;PPIA;DDX3X;CLU;ATP6AP2;DBNL;PSMB7;ASAH1;YPEL5;PSMD11;CTSB;HSP90AA1;CAB39;KCMF1;ACTR2;KPNB1;FTH1;COPB1;SERPINB6;TIMP2;EEF1A1;VCL	SSTHGF
966	MSigDB_Hallmark_2020__UV Response Up	-0.426037	-2.45736	0	0.00515251	0.075	18/34	16.69%	NUP58;ATP6V1F;CDC5L;OLFM1;TMBIM6;CCK;ATP6V1C1;HSPA13;SOD2;TFRC;STK25;PRKACA;CYB5B;CTSV;MAPK8IP2;DNAJA1;ENO2;IL6ST	SSTHGF
967	GO_Biological_Process_2023__Neuron Projection Development (GO:0031175)	0.203784	2.41595	0	0.0184092	0.137	56/95	32.60%	SHANK3;MAPK8IP3;FLRT3;NEDD4;ULK1;MARK2;LRRK2;EPHB1;CNTNAP2;BICDL1;OPHN1;SH3GL2;DNM2;MAP4K4;SHTN1;DTNBP1;DOCK10;RAPGEF2;TAOK3;ARHGAP35;RAB6A;RB1;SRGAP3;RYK;GPM6A;TMEM108;CTNND2;MAP2;MYO16;FRY;TRIO;DCLK1;SGK1;PTPRM;TNIK;APP;CAMSAP2;MAPT;NLGN1;GRM7;PPP1R9A;PAK3;CAMSAP1;HMGB1;GSK3B;PTEN;VPS13B;NCKAP1;NMNAT2;FRYL;TBC1D24;ATXN10;DOCK7;LGI1;VAPA;NYAP2	SSTHGF
968	GO_Biological_Process_2023__Cellular Respiration (GO:0045333)	-0.420647	-2.39296	0	0.00871742	0.127	23/32	34.41%	UQCRB;UQCRH;COX7C;COX7A2;SLC25A13;ETFA;COX5A;NDUFA12;COX4I1;NDUFV1;NDUFA5;NDUFS5;NDUFC1;LYRM7;UQCRC2;ETFDH;NDUFS4;COX5B;SDHC;COX6B1;NDUFV3;CYCS;UQCRC1	SSTHGF
969	WikiPathway_2023_Human__Electron Transport Chain OXPHOS System In Mitochondria WP111	-0.408193	-2.3895	0	0.00856026	0.133	25/34	37.15%	UQCRB;UQCRH;COX7C;COX7A2;COX7A2L;COX5A;COX11;NDUFA12;COX4I1;NDUFV1;NDUFA5;ATP5F1A;NDUFS5;NDUFC1;ATP5MG;UQCRC2;NDUFS4;ATP5F1B;COX5B;SDHC;COX6B1;NDUFV3;UQCRC1;SLC25A27;ATP5MC2	SSTHGF
970	GO_Biological_Process_2023__Protein Localization To Organelle (GO:0033365)	-0.324637	-2.38425	0	0.0090395	0.147	45/62	44.58%	XPA;ATP6V1D;SSB;MTCH2;GABARAPL2;ARL3;FKBP8;MARCHF5;YBX1;ARL6;RAB11A;CEP68;DDX3X;CNTLN;DNAJA1;COG3;IFT122;DDX1;BBS4;CSNK1D;PIKFYVE;GAK;COG7;TIA1;SNX10;TRAM1;MDM2;TMEM30A;OPTN;RIPOR1;YWHAE;TUB;BBS2;CCDC47;ZBTB7A;DCP1A;SORL1;DNAAF11;VPS35;CAMLG;WASHC2A;GBF1;RPL11;DHX9;PAQR3	SSTHGF
971	KEGG_2021_Human__Alzheimer disease	-0.245138	-2.34112	0.00115075	0.0125623	0.204	70/136	34.58%	UQCRB;CAPN2;PSMD13;VDAC1;UQCRH;COX7C;PSMD12;CSNK2A2;PSMB1;COX7A2;TUBB;EIF2AK3;PSMB2;GAPDH;CALM2;ITPR2;PSMC2;IRS2;VDAC2;CSNK1E;COX7A2L;COX5A;NDUFA12;COX4I1;CALM3;NDUFV1;NDUFA5;VDAC3;CSNK1A1;KLC1;ATP5F1A;WIPI2;MAP3K5;NDUFS5;PIK3R1;MAPK1;TUBA1B;NDUFC1;PSMC6;WNT16;GRIN2A;PPP3CB;PSMB7;CALM1;PSMD11;SEM1;ITPR1;LRP1;PIK3R4;UQCRC2;TUBA1A;IDE;PSEN1;NDUFS4;PSMA1;ATP5F1B;COX5B;SDHC;APBB1;KIF5B;COX6B1;KIF5A;N…	SSTHGF
972	KEGG_2021_Human__Oxidative phosphorylation	-0.346374	-2.33279	0	0.0135064	0.225	34/48	41.45%	UQCRB;UQCRH;ATP6V1D;COX7C;ATP6V1F;ATP6V1E1;COX7A2;ATP6V1C1;PPA1;COX7A2L;COX5A;COX11;NDUFA12;COX4I1;NDUFV1;NDUFA5;ATP5F1A;NDUFS5;NDUFC1;ATP6V1B2;ATP6V0B;ATP5MG;UQCRC2;NDUFS4;ATP5F1B;COX5B;SDHC;COX6B1;NDUFV3;UQCRC1;ATP5MC2;NDUFB9;COX10;ATP6V0D1	SSTHGF
973	GO_Biological_Process_2023__Response To Endoplasmic Reticulum Stress (GO:0034976)	-0.366071	-2.32866	0	0.0132493	0.232	21/41	20.82%	RNF185;EIF2AK3;UFL1;SEL1L;VCP;PDIA3;DNAJC10;DAB2IP;OS9;ERLEC1;NCK1;TMEM33;UBQLN1;MAP3K5;HSP90B1;PIK3R1;FLOT1;PDIA6;TMCO1;UFM1;ITPR1	SSTHGF
974	GO_Biological_Process_2023__Cell-Cell Adhesion Via Plasma-Membrane Adhesion Molecules (GO:0098742)	0.246159	2.31814	0	0.0307247	0.233	27/57	20.57%	CDH8;PTPRT;CDH2;FLRT3;CDH4;CDH13;ROBO2;ADGRL1;IGSF21;CRB1;LRRC4C;TENM4;GRID2;PTPRF;CDH18;CADM2;TENM3;IL1RAPL1;LRRC4B;ALCAM;DSCAML1;CDH9;TENM2;ADGRL3;LRFN5;UNC5D;TENM1	SSTHGF
975	KEGG_2021_Human__Coronavirus disease	-0.328474	-2.31662	0	0.0141241	0.248	30/56	26.93%	RPL8;RPL34;RPL13A;RPL13;RPL15;RPS27A;RPL23;RPS27L;RPS3A;STAT1;RPL32;RPL28;RPL5;IFNAR1;RPL6;PIK3R1;RPLP1;MAPK1;UBA52;TBK1;RPSA;IL6ST;RPS14;RPS8;RPL31;RPS29;RPS20;RPS9;RPL14;PRKCB	SSTHGF
976	KEGG_2021_Human__Cell adhesion molecules	0.332843	2.31049	0	0.0295521	0.245	21/33	26.11%	NLGN4Y;CDH2;CDH4;NRXN2;CNTNAP2;LRRC4C;NCAM2;PTPRF;LRRC4B;JAM3;ALCAM;NFASC;NEGR1;NRXN3;CNTN1;PTPRM;NRCAM;NLGN4X;CADM1;NCAM1;NLGN1	SSTHGF
977	GO_Cellular_Component_2023__Potassium Channel Complex (GO:0034705)	0.329933	2.309	0	0.0272642	0.246	18/30	22.00%	ABCC8;KCNQ3;CNTNAP2;GRIK5;KCNH1;KCND3;GRIK3;KCNB2;DPP10;GRIK2;KCNIP4;KCNB1;DPP6;KCNC2;KCND2;KCNQ5;KCNMA1;KCNJ3	SSTHGF
978	KEGG_2021_Human__Huntington disease	-0.25931	-2.30169	0	0.0157847	0.278	61/115	34.41%	UQCRB;PSMD13;VDAC1;RCOR1;UQCRH;COX7C;PSMD12;CREB5;TAF4;PSMB1;COX7A2;TUBB;PSMB2;POLR2F;DNAL1;PSMC2;MAP3K10;SOD2;VDAC2;COX7A2L;COX5A;NDUFA12;COX4I1;NDUFV1;NDUFA5;VDAC3;KLC1;ATP5F1A;WIPI2;MAP3K5;NDUFS5;TUBA1B;NDUFC1;PSMC6;SOD1;PSMB7;PSMD11;SEM1;ITPR1;PIK3R4;CLTCL1;UQCRC2;TUBA1A;CLTA;NDUFS4;IFT57;PSMA1;ATP5F1B;CLTC;COX5B;SDHC;KIF5B;COX6B1;KIF5A;ATG14;DCTN4;NDUFV3;CREBBP;AP2A1;CYCS;UQCRC1	SSTHGF
979	GO_Biological_Process_2023__Negative Regulation Of Intrinsic Apoptotic Signaling Pathway (GO:2001243)	-0.488985	-2.28529	0	0.0175872	0.315	11/19	15.80%	TMBIM6;PTPN1;ENO1;PARK7;SOD2;SIRT1;TPT1;PPIA;DDX3X;CLU;DNAJA1	SSTHGF
980	GO_Biological_Process_2023__Gene Expression (GO:0010467)	-0.260285	-2.28109	0	0.017628	0.324	94/108	63.88%	RPL8;ZNG1E;RPL34;RPL13A;RPL13;RPL15;SRSF3;RPS27A;HNRNPK;HARS1;RPS3A;EEF1A2;GLE1;SARS1;RPL32;RPL28;THOC7;EXOSC6;RPL5;MRRF;RPL6;RPLP1;NCBP3;KPNA4;RPSA;DHX8;TSPAN14;RPS14;RPS8;RPL31;RPS29;MRPL3;RPS20;FMR1;PABPN1;HNRNPD;NUP214;NUP88;HSPD1;RPS9;RPL14;AGFG1;DARS1;HBS1L;RPS24;EEF1A1;EXOSC7;RPL41;LMF1;XPO1;RPL37;FYTTD1;AGO2;RBM4;SMG7;RPL37A;EXOSC10;FASTKD2;SORL1;YTHDC1;RPS3;RPL11;NCBP1;HNRNPL;HNRNPH3;MCM…	SSTHGF
981	KEGG_2021_Human__Amyotrophic lateral sclerosis	-0.233903	-2.27109	0	0.0188289	0.349	117/144	62.20%	UQCRB;PSMD13;VDAC1;UQCRH;COX7C;PSMD12;NUP58;PSMB1;SRSF3;COX7A2;TUBB;EIF2AK3;PSMB2;DNAL1;GABARAPL2;PSMC2;ACTG1;GLE1;VCP;ACTB;NRG1;COX7A2L;COX5A;NUP54;NDUFA12;GABARAPL1;COX4I1;NDUFV1;NDUFA5;KLC1;UBQLN1;ATP5F1A;WIPI2;MAP3K5;NDUFS5;SRSF7;TUBA1B;NDUFC1;TBK1;PSMC6;GRIN2A;PPP3CB;SOD1;PSMB7;PSMD11;SEM1;PFN2;PIK3R4;UQCRC2;TUBA1A;TARDBP;NDUFS4;PSMA1;NUP214;ATP5F1B;NUP88;COX5B;OPTN;SDHC;RAB1A;KIF5B;COX6B1;K…	SSTHGF
982	GO_Molecular_Function_2023__Proton Transmembrane Transporter Activity (GO:0015078)	-0.529175	-2.25692	0.0015674	0.0202946	0.377	14/16	38.56%	UQCRB;UQCRH;COX7C;ATP6V1F;SLC11A2;SLC25A13;COX7A2L;COX5A;COX4I1;ATP6V1B2;COX5B;COX6B1;UQCRC1;SLC47A1	SSTHGF
983	MSigDB_Hallmark_2020__Allograft Rejection	-0.38723	-2.20923	0.00137552	0.0295445	0.497	21/32	33.84%	BCAT1;IFNGR2;GALNT1;STAT4;RPS3A;STAT1;CCND2;NCK1;UBE2N;NPM1;HIF1A;MRPL3;EIF3A;RPS9;PRKCB;APBB1;EIF3J;DARS1;THY1;GLMN;AARS1	SSTHGF
984	GO_Biological_Process_2023__Aerobic Electron Transport Chain (GO:0019646)	-0.421487	-2.19321	0.00139665	0.0329434	0.539	18/25	34.41%	UQCRB;UQCRH;COX7C;COX7A2;COX5A;COX4I1;NDUFV1;NDUFA5;NDUFS5;NDUFC1;UQCRC2;NDUFS4;COX5B;SDHC;COX6B1;NDUFV3;CYCS;UQCRC1	SSTHGF
985	GO_Cellular_Component_2023__Intracellular Organelle Lumen (GO:0070013)	-0.198676	-2.18787	0	0.0328938	0.544	130/223	44.44%	PSMD13;GLDC;IDH3A;CANX;PSMD12;PKM;COL19A1;PSMB1;DAG1;SUPV3L1;SRP14;PAFAH1B2;FDX1;TRNT1;GOT2;ETFA;PSMC2;HSPA8;SOD2;VCP;PDIA3;GOLIM4;DNAJC10;GARS1;PODXL2;TRMT61B;OS9;NARF;AP4E1;DECR1;DGLUCY;PPTC7;NAXE;ERLEC1;MRRF;DCN;DLD;HSP90AB1;PGAM1;ATP5F1A;PDE2A;HSP90B1;MAPK1;PPIA;BTD;PDP1;LAMC1;DDX3X;WARS2;SOD1;LYRM7;PCCB;DBNL;VCPIP1;PSMB7;ASAH1;MAIP1;PDK3;TSPAN14;YPEL5;MTHFD2L;PDIA6;PSMD11;HS3ST1;DNAJA3;GLUD1…	SSTHGF
986	GO_Biological_Process_2023__Neuron Development (GO:0048666)	0.203406	2.17699	0	0.0609815	0.487	45/75	33.48%	FLRT3;NEDD4;ULK1;ROBO2;UGDH;CNTNAP2;BICDL1;OPHN1;SH3GL2;TENM4;DTNBP1;TENM3;RAPGEF2;RAB6A;RB1;RYK;PBX1;NTRK2;TENM2;SRRM4;TENM1;GPM6A;TMEM108;MAP2;FRY;MYT1L;PTPRM;MEF2C;APP;ATP8A2;MAPT;NLGN1;PPP1R9A;CAMSAP1;HMGB1;GSK3B;VPS13B;FRYL;TBC1D24;ATXN10;DOCK7;LGI1;WNK1;VAPA;B4GALT6	SSTHGF
987	GO_Biological_Process_2023__Mitochondrial ATP Synthesis Coupled Electron Transport (GO:0042775)	-0.406998	-2.17629	0.00140252	0.0350248	0.572	19/27	34.41%	UQCRB;UQCRH;COX7C;COX7A2;COX5A;NDUFA12;COX4I1;NDUFV1;NDUFA5;NDUFS5;NDUFC1;UQCRC2;NDUFS4;COX5B;SDHC;COX6B1;NDUFV3;CYCS;UQCRC1	SSTHGF
988	KEGG_2021_Human__Pathways of neurodegeneration	-0.209844	-2.16681	0.00109649	0.036759	0.598	89/185	34.58%	UQCRB;CAPN2;CAMK2B;PSMD13;VDAC1;UQCRH;COX7C;PSMD12;UBC;CSNK2A2;PSMB1;COX7A2;RPS27A;UBA1;TUBB;EIF2AK3;PSMB2;CALM2;ITPR2;DNAL1;GABARAPL2;PSMC2;PARK7;MAP3K10;VDAC2;VCP;CSNK1E;PRNP;COX7A2L;COX5A;NDUFA12;GABARAPL1;COX4I1;CALM3;NDUFV1;CAMK2A;NDUFA5;VDAC3;CSNK1A1;KLC1;ATP5F1A;WIPI2;MAP3K5;NDUFS5;MAPK1;UBA52;TUBA1B;NDUFC1;TBK1;PSMC6;WNT16;UCHL1;GRIN2A;PPP3CB;SOD1;PSMB7;CALM1;PSMD11;SEM1;ITPR1;PIK3R4;UQCR…	SSTHGF
989	GO_Molecular_Function_2023__Core Promoter Sequence-Specific DNA Binding (GO:0001046)	-0.497207	-2.15993	0.00155039	0.0380449	0.619	13/16	35.55%	GTF2B;GTF2A1;TAF4;PARK7;STAT1;SNAPC3;SMARCB1;NPM1;TAF1B;TAF1;BAZ2A;SMARCA4;AGO2	SSTHGF
990	MSigDB_Hallmark_2020__Adipogenesis	-0.273845	-2.15814	0	0.0373224	0.623	53/73	50.27%	DHRS7;SNCG;IDH3A;UBC;RIOK3;PDCD4;MTCH2;MTARC2;ME1;DECR1;ATP1B3;GHITM;NKIRAS1;NDUFA5;NMT1;DLD;UBQLN1;EPHX2;PTCD3;REEP5;IMMT;SOD1;ELMOD3;HADH;ATL2;DLAT;GBE1;SDHC;BAZ2A;RNF11;MCCC1;UQCRC1;CMPK1;MGLL;AIFM1;GPD2;APLP2;DNAJC15;BCL2L13;PEX14;PFKFB3;ACO2;G3BP2;ACADM;ALDH2;MIGA2;PPARG;MGST3;BCL6;RMDN3;YWHAG;DBT;LIFR	SSTHGF
991	KEGG_2021_Human__Ferroptosis	-0.443047	-2.15194	0.00146199	0.0381668	0.641	13/20	27.73%	NCOA4;SLC11A2;FTL;TFRC;VDAC2;PRNP;PCBP2;VDAC3;ACSL6;MAP1LC3A;SAT1;FTH1;SLC39A14	SSTHGF
992	GO_Molecular_Function_2023__Oxidoreduction-Driven Active Transmembrane Transporter Activity (GO:0015453)	-0.430758	-2.14782	0.00283286	0.038488	0.652	16/22	34.41%	UQCRB;UQCRH;COX7C;COX7A2L;COX5A;NDUFA12;COX4I1;NDUFV1;NDUFA5;NDUFS5;NDUFC1;NDUFS4;COX5B;COX6B1;NDUFV3;UQCRC1	SSTHGF
993	WikiPathway_2023_Human__MAPK Signaling Pathway WP382	0.173822	2.12996	0	0.0743025	0.574	68/103	43.74%	FGF9;MAPK8IP3;PTPN5;CHUK;MAP2K1;LRRK2;MKNK1;MRAS;RASGRP1;TAB1;FGF13;NFATC3;MAPKAPK5;FGF2;CACNG7;MAP4K4;RAP1A;CACNG3;PTPRR;RASGRF2;STK4;RASA1;RAPGEF2;ECSIT;TAOK3;NLK;CACNA2D3;CACNA1C;CACNA1A;NTRK2;BRAF;SOS1;PRKCA;CACNA1B;MAPK10;MAP4K3;FGF14;FGF12;AKT3;PRKACB;CACNA1D;MEF2C;CACNB4;PPP3CA;MAPT;NF1;RASA2;MAP2K4;CACNB2;TAB2;MAX;TRAF6;MAP2K6;TAOK1;MAPK9;PLA2G4C;MAP3K7;MAP3K13;MAPK8;CACNA1E;ARRB1;PAK1;CA…	SSTHGF
994	GO_Biological_Process_2023__Learning (GO:0007612)	0.3375	2.12897	0	0.0701879	0.581	16/26	24.59%	SHANK3;NLGN4Y;LGMN;ATXN1L;CNTNAP2;FGF13;SHANK2;EIF2AK4;MAP1A;SLC8A3;SLC6A1;FYN;NTRK2;NRXN3;ATXN1;NLGN4X	SSTHGF
995	GO_Biological_Process_2023__Ubiquitin-Dependent ERAD Pathway (GO:0030433)	-0.393283	-2.12494	0.00140252	0.0453524	0.713	14/27	18.92%	RNF185;CANX;TRIM13;SEL1L;VCP;DNAJC10;OS9;ERLEC1;JKAMP;UBQLN1;HSP90B1;PSMC6;FBXO44;TMEM67	SSTHGF
996	GO_Cellular_Component_2023__Cytoplasmic Vesicle Lumen (GO:0060205)	-0.350519	-2.12108	0.0013587	0.0458756	0.726	19/38	21.98%	PSMD13;PSMD12;PKM;PSMB1;SRP14;PAFAH1B2;PSMC2;HSPA8;VCP;HSP90AB1;PGAM1;PPIA;DDX3X;DBNL;PSMB7;PSMD11;GDI2;HSP90AA1;CAB39	SSTHGF
997	GO_Biological_Process_2023__Pyruvate Metabolic Process (GO:0006090)	-0.503187	-2.11504	0.00156006	0.0469615	0.748	9/15	16.35%	VDAC1;PKM;GAPDH;ME1;ENO1;DLD;PGAM1;PGK1;ENO2	SSTHGF
998	GO_Biological_Process_2023__Proteolysis Involved In Protein Catabolic Process (GO:0051603)	-0.353473	-2.10836	0.00410397	0.0482577	0.761	19/34	28.09%	CAPN2;USP28;RPS27A;UBE2W;VCP;CTSV;UBA52;CUL4B;FBXO44;HM13;OTUD7B;CTSB;ZYG11B;DDI2;IDE;RSPRY1;ATXN3;MDM2;ZRANB1	SSTHGF
999	GO_Molecular_Function_2023__Guanyl-Nucleotide Exchange Factor Activity (GO:0005085)	0.181792	2.10172	0	0.0760908	0.628	69/86	57.96%	DENND3;DENND2A;VPS9D1;KNDC1;MCF2L;ARHGEF3;BCR;RASGRP1;ARFGEF2;ARHGEF4;PSD;SH3BP5;RAP1A;DOCK10;DENND4C;RASGRF2;RAPGEF2;RAPGEF1;TIAM2;TIAM1;DOCK9;RAPGEF4;SOS1;DENND1A;CCDC88A;SBF2;KALRN;DOCK3;TRIO;MYCBP2;HERC2;RAB3IP;MCF2L2;RALGPS1;DENND5A;RGL1;PLCE1;DIS3;ARHGEF7;ARHGEF12;ARFGEF1;FARP1;DOCK7;DENND5B;PLEKHG1;RAPGEF5;ITSN1;DENND4A;RAP1GDS1;RIC8B;SLC38A9;RAB3GAP1;DOCK11;DNMBP;ARHGEF11;EIF2B3;CYTH1;CYT…	SSTHGF
1000	KEGG_2021_Human__Vibrio cholerae infection	-0.404199	-2.10049	0.00578035	0.0501698	0.782	12/24	18.50%	ATP6V1D;ATP6V1F;ATP6V1E1;SEC61A2;ATP6V1C1;ACTG1;ACTB;PRKACA;ARF1;ATP6V1B2;ATP6V0B;SLC12A2	SSTHGF
1001	WikiPathway_2023_Human__Glycolysis And Gluconeogenesis WP534	-0.488279	-2.09099	0.00157233	0.0531799	0.819	12/16	30.91%	PKM;GAPDH;GOT2;ENO1;DLD;PGAM1;PGK1;ENO2;PFKP;MPC1;DLAT;GOT1	SSTHGF
1002	GO_Biological_Process_2023__Positive Regulation Of Microtubule Polymerization (GO:0031116)	0.423917	2.08529	0	0.0786468	0.662	15/16	50.36%	CDK5RAP2;MECP2;SLAIN2;TOGARAM1;NAV3;CLASP1;MAPT;CKAP5;CLIP1;SLAIN1;PAK1;PDE4DIP;NUMA1;RAC1;CDK5R1	SSTHGF
1003	WikiPathway_2023_Human__Proteasome Degradation WP183	-0.446723	-2.07703	0.00146628	0.0573245	0.843	11/19	18.71%	PSMD13;PSMD12;UBC;PSMB1;UBA1;PSMB2;PSMC2;PSMC6;UCHL1;PSMB7;PSMD11	SSTHGF
1004	GO_Cellular_Component_2023__Endoplasmic Reticulum Membrane (GO:0005789)	-0.184127	-2.07044	0.00215983	0.0586678	0.856	198/268	60.16%	DHRS7;SAMD8;SPCS3;RNF185;CANX;RAB18;VMA21;RPS27A;UBA1;EIF2AK3;TMBIM6;TMED10;TRIM13;PTPN1;EMC3;ITPR2;GALNT1;NCEH1;JPH3;UFL1;SEL1L;SPTLC2;TMX3;TMEM14A;DPM1;SRI;ARL6IP1;TMEM38A;PLD1;VCP;ACER3;OS9;SLC30A7;SPTLC1;SSR1;LMAN1;SAR1B;EXTL2;PITPNB;COPB2;SEC24C;TMEM33;MARCHF5;ELOVL5;SLC9A6;LCLAT1;HSP90B1;CDC42;GRIN3A;REEP3;MBOAT7;UBA52;CYP46A1;ALG5;DNAJA1;MIA2;SLC37A1;SLC37A3;GRIN2A;ATP6AP2;PCYT1A;SVIP;TMEM…	SSTHGF
1005	GO_Cellular_Component_2023__Voltage-Gated Potassium Channel Complex (GO:0008076)	0.332302	2.06498	0.00634921	0.0842977	0.714	15/24	22.00%	KCNQ3;CNTNAP2;KCNH1;KCND3;KCNB2;DPP10;KCNIP4;KCNB1;DPP6;HCN1;KCNC2;KCND2;KCNQ5;KCNMA1;KCNJ3	SSTHGF
1006	GO_Biological_Process_2023__Regulation Of Cytoplasmic Translation (GO:2000765)	-0.475665	-2.06352	0.00152439	0.060358	0.87	11/16	27.12%	PKM;YBX1;CPEB2;CPEB1;PARP16;PABPC1;FMR1;CSDE1;HNRNPD;DHX36;UNK	SSTHGF
1007	MSigDB_Hallmark_2020__Unfolded Protein Response	-0.341979	-2.05928	0.00269542	0.0607025	0.877	31/38	49.77%	SPCS3;EIF2AK3;KHSRP;SDAD1;SSR1;EIF4A2;HSP90B1;ALDH18A1;PDIA6;RPS14;NPM1;SERP1;CNOT6;IARS1;KIF5B;HSPA9;XPOT;SEC11A;SLC1A4;DCP2;DCP1A;EXOSC10;YWHAZ;DDX10;ERO1A;CNOT4;ATP6V0D1;ATF6;SEC31A;DNAJC3;EXOC2	SSTHGF
1008	WikiPathway_2023_Human__Translation Factors WP107	-0.43855	-2.04049	0.00148148	0.0677596	0.908	16/20	40.64%	EIF2AK3;EEF1A2;EIF5B;EEF2K;EIF4A2;PABPC1;ETF1;EIF3A;EIF3J;EIF1AX;EEF1A1;EIF2AK1;EIF3E;EIF4B;EIF5;EIF3H	SSTHGF
1009	GO_Biological_Process_2023__Negative Regulation Of Protein-Containing Complex Assembly (GO:0031333)	-0.392033	-2.02075	0.00286944	0.0772326	0.928	13/25	21.01%	TRAF3IP1;RPL13A;RIOK3;THRA;PARK7;HSPA8;PRKCZ;CSNK1A1;CDC42;DDX3X;CLU;SVIP;PPM1A	SSTHGF
1010	GO_Biological_Process_2023__Chemical Synaptic Transmission (GO:0007268)	0.142897	2.01874	0.00680272	0.105635	0.797	65/120	33.31%	SLC17A8;NLGN4Y;CDH8;HRH2;SHISA6;UNC13C;NRXN2;KCNQ3;GLRA2;GIPC1;CHRM3;GRIK5;LIN7A;GRID2;DLGAP1;DLGAP2;GRIA1;GRIK3;SYN3;SLC6A1;AMPH;GRIK2;SNCA;GRIA4;GABRA2;GABRB1;GRIA3;GABRG3;GRID1;CACNA1A;EXOC4;DLG2;SYT1;ASIC2;KCND2;CACNA1B;SYN2;ERC1;RPS6KA2;GRIN2B;PTPRN2;DLG1;KIF1B;DTNA;ERC2;GRIA2;GAD2;GABRB3;FCHSD2;CACNB4;NLGN4X;NLGN1;GRM7;GABRB2;PTEN;STXBP1;SNAP25;GABBR2;PAFAH1B1;CACNB2;NRXN1;BSN;AKAP9;APBA2;U…	SSTHGF
1011	GO_Cellular_Component_2023__Secretory Granule Lumen (GO:0034774)	-0.256831	-2.0177	0.00376412	0.077749	0.931	41/77	34.01%	PSMD13;NHLRC3;PSMD12;PKM;PSMB1;SRP14;PAFAH1B2;FTL;PSMC2;HSPA8;VCP;NRG1;TMSB4X;HSP90AB1;PGAM1;APOOL;MAPK1;PPIA;DDX3X;TADA2A;CLU;ACTN4;DBNL;IGF1;PSMB7;PSMD11;GDI2;HSP90AA1;QSOX1;CAB39;FAM3C;ACTR2;KPNB1;ROCK1;HEXB;TIMP2;PYGB;EEF1A1;VCL;FAF2;CCT8	SSTHGF
1012	GO_Cellular_Component_2023__Dendrite (GO:0030425)	0.140025	2.01312	0	0.104023	0.805	113/138	63.78%	MAPK8IP3;HRH2;TMEM266;MARK2;KNDC1;EPHA10;EPHA6;LRRK2;PRKAA1;EPHB1;CNTNAP2;FGF13;ABL1;BIN1;CHRM3;CRIPT;MAP1A;BRINP3;SLC8A1;GRIA1;SACS;IL1RAPL1;GRIK3;KCNB2;SLC6A6;SLC8A3;FYN;KCNB1;MAGI2;GABRA2;ADCY8;GABRG3;NTRK2;TENM2;HCN1;KCNC2;MAP2;TRIM9;ANK3;KIF1B;GRIA2;CPEB3;SLC4A10;GPHN;MARK1;NSG2;NLGN4X;DSCAM;MAPT;NLGN1;GRM7;PPP1R9A;NF1;SORBS2;DNER;GSK3B;KPNA1;RUFY3;FXR1;KIF3B;GIGYF2;STRN3;ARHGAP44;ATXN10;FAR…	SSTHGF
1013	KEGG_2021_Human__RNA transport	-0.267386	-2.0119	0.00246305	0.0798423	0.935	54/66	58.01%	SAP18;NUP58;TRNT1;SUMO1;EEF1A2;EIF5B;GLE1;THOC7;NUP54;EIF4A2;PABPC1;TARDBP;FMR1;EIF4G2;EIF3A;NUP214;NUP88;KPNB1;RNPS1;ACIN1;EIF3J;TGS1;UPF3A;CYFIP2;EIF1AX;EEF1A1;XPOT;XPO1;STRAP;EIF3E;UBE2I;SRRM1;PNN;EIF4B;NUP210;EIF5;EIF3H;XPO5;NCBP1;SENP2;CASC3;NUP160;POM121;NUP205;RANGAP1;THOC1;NUP98;NMD3;EIF2B3;CYFIP1;NUP153;CLNS1A;POM121C;THOC2	SSTHGF
1014	GO_Biological_Process_2023__Adenylate Cyclase-Activating G Protein-Coupled Receptor Signaling Pathway (GO:0007189)	0.417104	2.01136	0.009375	0.100169	0.809	12/15	35.17%	GNG2;ADGRL1;ADCY9;ADCY5;RAPGEF2;ADGRL2;ADCY8;ADGRL3;ADGRB3;GNAQ;GNB1;ADCY1	SSTHGF
1015	GO_Cellular_Component_2023__Mitochondrial Membrane (GO:0031966)	-0.190408	-2.00707	0.0043956	0.0809681	0.94	137/184	59.50%	UQCRB;VDAC1;PGRMC1;UQCRH;COX7C;MOAP1;TMEM14B;SLC25A3;SYNJ2BP;RPS27A;MTCH2;TMBIM6;SLC25A37;MTARC2;SLC25A13;ATAD1;TOMM20;TMEM65;TMEM14A;VDAC2;AGK;SLC25A21;COX7A2L;COX5A;COX11;NDUFA12;TIMMDC1;ATP5MJ;COX4I1;MRS2;GHITM;NDUFV1;NDUFA5;VDAC3;MARCHF5;ATP5F1A;CYB5B;PDE2A;NDUFS5;ALDH18A1;UBA52;NDUFC1;CLU;PTCD3;NIPSNAP2;IMMT;LYRM7;STARD7;MAIP1;MPC1;ATP5MG;QTRT1;HADHA;UQCRC2;RTN4IP1;MRPL3;APOO;ETFDH;PSEN1;SLC…	SSTHGF
1016	KEGG_2021_Human__Phagosome	-0.319786	-2.00682	0.00416089	0.0795515	0.94	19/40	22.44%	ATP6V1D;CANX;ATP6V1F;ATP6V1E1;RAB5B;SEC61A2;LAMP2;TUBB;ATP6V1C1;TFRC;ACTG1;ACTB;DYNC1LI1;TUBA1B;ATP6V1B2;ATP6V0B;TUBA1A;DYNC1I2;PIKFYVE	SSTHGF
1017	GO_Biological_Process_2023__Positive Regulation Of Proteasomal Protein Catabolic Process (GO:1901800)	-0.318098	-2.00613	0.00405954	0.0785145	0.941	22/42	27.67%	RNF14;RNF185;SUMO1;PSMC2;VCP;CSNK1E;DAB2IP;SIRT2;NUB1;CSNK1A1;CLU;PSMC6;RNF19A;ARIH2;ZYG11B;RNF217;CSNK1D;FMR1;ARIH1;ATXN3;TAF1;MDM2	SSTHGF
1018	GO_Cellular_Component_2023__Ribosome (GO:0005840)	-0.433724	-2.00125	0.00144928	0.0798706	0.948	16/19	43.95%	RPL8;RPL13A;RPL15;RPL32;NCK1;RPL6;RPL31;RPS29;RPS9;SERP1;RPL41;RPS3;NUFIP2;EIF3H;RPL11;DHX9	SSTHGF
1019	KEGG_2021_Human__Lysosome	-0.307009	-1.99598	0	0.081967	0.958	41/46	59.71%	SLC11A2;LAMP2;MFSD8;AP4E1;CTSV;LAPTM4B;PSAP;AP3S1;ATP6V0B;ASAH1;ABCB9;CTSB;GNPTG;CLTCL1;CLTA;ARSG;SORT1;AP3B2;CLTC;HEXB;AP1M1;SUMF1;GALC;IGF2R;MANBA;LIPA;AP3D1;ATP6V0D1;HGSNAT;SCARB2;ARSB;AP3B1;CLTB;ENTPD4;GLB1;SLC17A5;GNPTAB;ATP6V0A2;HEXA;AP1G1;GNS	SSTHGF
1020	GO_Cellular_Component_2023__Cell-Substrate Junction (GO:0030055)	-0.202372	-1.98719	0.00110988	0.0855911	0.965	77/157	34.98%	CAPN2;RPL8;RAB21;DYNLL1;RPL13A;ARHGAP24;DAG1;HNRNPK;CFL1;RPS3A;ADAM9;HSPA8;MARCKS;SVIL;ACTG1;YWHAQ;ACTB;PDIA3;RSU1;ACTR3;ARPC2;PCBP2;ARF1;RPL5;RPL6;SNTB2;IQGAP1;STX16;HSP90B1;CDC42;RPLP1;PARVB;MAPK1;PPIA;ANXA6;ARL14EP;ACTN4;FLOT1;EFNB2;ARHGAP22;FHL1;RPS14;RPS8;RPL31;CORO1C;PPP1CC;PABPC1;RPS29;GDI2;RRAS2;LRP1;NPM1;AKAP12;GNA13;RALA;ITGB1BP1;CTTN;ACTR2;RPS9;PIP5K1C;CLTC;HACD3;G3BP1;TPM4;DMD;YWHAE;T…	SSTHGF
1021	KEGG_2021_Human__Diabetic cardiomyopathy	-0.257347	-1.98539	0.00621118	0.085063	0.967	37/70	34.58%	UQCRB;CAMK2B;VDAC1;UQCRH;COX7C;COX7A2;GAPDH;PARP1;VDAC2;PRKCZ;COX7A2L;COX5A;NDUFA12;COX4I1;NDUFV1;CAMK2A;NDUFA5;VDAC3;ATP5F1A;NDUFS5;PIK3R1;NDUFC1;PDK3;PPP1CC;MPC1;UQCRC2;NDUFS4;ATP5F1B;PRKCB;COX5B;SDHC;COX6B1;CAMK2G;GSR;NDUFV3;UQCRC1;ATP2A2	SSTHGF
1022	GO_Biological_Process_2023__Regulation Of Synaptic Transmission, Glutamatergic (GO:0051966)	0.283228	1.98375	0.00790514	0.106777	0.851	29/33	56.05%	SHANK3;CDH2;LRRK2;OPHN1;CACNG7;CACNG3;GRM1;GRIK3;HCN1;SYT1;GRM5;GRIN2B;DGKI;MEF2C;PLPPR4;NLGN1;GRM7;FXR1;NRXN1;UNC13A;DGKZ;TSHZ3;GRIK1;CACNG2;GRIN2D;SLC38A2;CACNG4;HOMER1;CACNG8	SSTHGF
1023	KEGG_2021_Human__Proteasome	-0.477422	-1.98146	0.00453172	0.0860166	0.974	10/15	24.91%	PSMD13;PSMD12;PSMB1;PSMB2;PSMC2;PSMC6;PSMB7;PSMD11;SEM1;PSMA1	SSTHGF
1024	GO_Cellular_Component_2023__Focal Adhesion (GO:0005925)	-0.20235	-1.97724	0.00111607	0.0870039	0.976	76/155	34.98%	CAPN2;RPL8;RAB21;DYNLL1;RPL13A;ARHGAP24;DAG1;HNRNPK;CFL1;RPS3A;ADAM9;HSPA8;MARCKS;SVIL;ACTG1;YWHAQ;ACTB;PDIA3;RSU1;ACTR3;ARPC2;PCBP2;ARF1;RPL5;RPL6;SNTB2;IQGAP1;STX16;HSP90B1;CDC42;RPLP1;PARVB;MAPK1;PPIA;ANXA6;ARL14EP;ACTN4;FLOT1;EFNB2;ARHGAP22;FHL1;RPS14;RPS8;RPL31;CORO1C;PPP1CC;PABPC1;RPS29;GDI2;RRAS2;LRP1;NPM1;AKAP12;GNA13;RALA;ITGB1BP1;CTTN;ACTR2;RPS9;PIP5K1C;CLTC;HACD3;G3BP1;TPM4;YWHAE;THY1;…	SSTHGF
1025	MSigDB_Hallmark_2020__E2F Targets	-0.303831	-1.97639	0.00128535	0.0859798	0.976	37/44	56.62%	CSE1L;ATAD2;TUBB;RFC1;RAD21;TFRC;MLH1;CBX5;DEK;STMN1;ILF3;PAICS;BARD1;DNMT1;IPO7;CNOT9;NBN;HNRNPD;CDC25B;BRMS1L;SMC6;XPO1;PNN;TRA2B;SRSF1;NAP1L1;NASP;RAD51C;PSIP1;CTCF;ORC2;NUP205;CCP110;GSPT1;CIT;MSH2;NUP153	SSTHGF
1026	GO_Cellular_Component_2023__Organelle Inner Membrane (GO:0019866)	-0.212268	-1.97629	0.00461361	0.0846247	0.976	75/126	43.19%	UQCRB;UQCRH;COX7C;SLC25A3;ATP11B;SLC25A13;TMEM65;SIRT1;AGK;DPY19L3;SLC25A21;GARS1;TMX4;COX7A2L;COX5A;COX11;NDUFA12;DPY19L1;TIMMDC1;ATP5MJ;COX4I1;MRS2;CBX3;GHITM;NDUFV1;NDUFA5;ATP5F1A;PDE2A;NDUFS5;ALDH18A1;NDUFC1;CLU;PTCD3;IMMT;MAIP1;MPC1;ATP5MG;HADHA;UNC50;UQCRC2;MRPL3;APOO;ETFDH;PSEN1;NDUFS4;MRPL33;MTG2;ATP5F1B;HSPD1;DAP3;COX5B;SDHC;COX6B1;MRPS9;NDUFV3;CYCS;UQCRC1;SLC25A27;AIFM1;GPD2;TAMM41;NDUF…	SSTHGF
1027	GO_Biological_Process_2023__Protein Transport (GO:0015031)	-0.208839	-1.9669	0.0045403	0.0894348	0.979	102/132	60.66%	RAB21;ARL5B;CANX;RAB18;RAB5B;LAMP2;TMED10;SEC23IP;SEL1L;ARL4C;TFRC;SNX7;RAB14;YWHAH;VAMP2;ARF1;SAR1B;COPB2;TOM1;SNX1;RAB6B;STX16;ARL6;HSP90B1;CLU;MIA2;ARFGAP3;TMEM167A;SYNDIG1;GOLPH3L;LRP1;KIF3A;NPM1;SNX27;ARRDC3;OLFM2;VPS26A;RAB12;COG7;CTTN;SNX8;SLU7;PRKCB;USO1;STX17;CLTC;OPTN;ARL6IP5;SEPTIN9;EIF2D;NAPG;RAB1A;RUFY1;STX1B;KIF13A;HSPA9;ARFIP1;STX3;RAB31;RAB22A;AP2A1;BBS2;NSF;RAB5A;STXBP3;ARCN1;DNA…	SSTHGF
1028	GO_Cellular_Component_2023__Postsynaptic Density Membrane (GO:0098839)	0.298948	1.96472	0.00722022	0.113514	0.889	17/29	22.78%	GRIK5;CACNG7;CACNG3;GRID2;GRM1;GRIA1;GRIK3;GRIK2;GRIA4;GRIA3;GRID1;DLG2;NETO1;GRM5;GRIN2B;DLG1;GRIA2	SSTHGF
1029	KEGG_2021_Human__Protein processing in endoplasmic reticulum	-0.249045	-1.9643	0.00125156	0.0894942	0.979	52/76	49.56%	CAPN2;SKP1;RNF185;CANX;SEC61A2;EIF2AK3;SEL1L;HSPA8;SEC23B;VCP;PDIA3;DNAJC10;OS9;SSR1;LMAN1;SAR1B;ERLEC1;SEC24C;HSP90AB1;UBQLN1;MAP3K5;HSP90B1;DNAJA1;SVIP;AMFR;PDIA6;MAN1C1;HSP90AA1;UGGT2;ATXN3;HSPH1;TRAM1;UGGT1;EIF2AK1;SEC24B;SEC23A;UBE2G2;SEC62;DNAJC1;PLAA;NSFL1C;ERO1A;UBE2D2;ATF6;UBE2G1;NPLOC4;MBTPS1;SEC31A;UBE2D3;EIF2AK2;DNAJC3;STT3B	SSTHGF
1030	GO_Molecular_Function_2023__Transmitter-Gated Monoatomic Ion Channel Activity Involved In Regulation Of Postsynaptic Membrane Potential (GO:1904315)	0.397226	1.96387	0.00934579	0.105145	0.889	11/16	22.78%	GRIK5;GRID2;GRIA1;GRIK3;GRIK2;GRIA4;GABRA2;GRIA3;GRID1;GRIN2B;GRIA2	SSTHGF
1031	GO_Molecular_Function_2023__Neurotransmitter Receptor Activity Involved In Regulation Of Postsynaptic Membrane Potential (GO:0099529)	0.397226	1.96387	0.00934579	0.105145	0.889	11/16	22.78%	GRIK5;GRID2;GRIA1;GRIK3;GRIK2;GRIA4;GABRA2;GRIA3;GRID1;GRIN2B;GRIA2	SSTHGF
1032	WikiPathway_2023_Human__Ferroptosis WP4313	-0.364746	-1.96121	0.00712251	0.0902463	0.979	15/26	27.73%	NCOA4;SLC11A2;FTL;TFRC;VDAC2;PRNP;PCBP2;VDAC3;TXNRD1;HMGCR;ACSL6;MAP1LC3A;SAT1;FTH1;SLC39A14	SSTHGF
1033	GO_Cellular_Component_2023__Glutamatergic Synapse (GO:0098978)	0.229538	1.95551	0	0.106299	0.895	29/48	32.15%	NLGN4Y;SHISA6;DLGAP3;GRIPAP1;ARHGAP39;BCR;OPHN1;SH3GL2;LRRC4C;RAP1A;DLGAP1;DLGAP2;IL1RAPL1;LRRC4B;ADGRL3;NRG3;LRFN5;ATP2B2;PCLO;CADPS;TRIO;CTTNBP2;NLGN4X;NLGN1;GSK3B;LRRTM3;SRCIN1;BSN;AKAP9	SSTHGF
1034	GO_Biological_Process_2023__Cytoskeleton Organization (GO:0007010)	0.211267	1.95034	0.00444444	0.10651	0.9	43/53	55.92%	SEMA6A;PACSIN2;TPM1;BIN1;MAPKAP1;LRCH3;DIAPH1;ZNF135;ANK1;SH3KBP1;CAPZB;PHIP;PCLO;DST;WDPCP;DPYSL2;BRWD1;MARK1;TNIK;CAMSAP1;PLCE1;MICAL3;FMNL2;ARHGAP21;MAST4;ZMYM4;RICTOR;KLHL20;WASF3;LARP4;SIPA1L3;MAST1;MAST2;MICAL2;RANBP9;RAC1;MTOR;STRIP1;SH3D19;CDC42BPB;RANBP10;PALLD;PACSIN1	SSTHGF
1035	GO_Cellular_Component_2023__Voltage-Gated Calcium Channel Complex (GO:0005891)	0.31735	1.94904	0.00645161	0.103633	0.901	17/24	32.66%	SCN9A;CACNG7;CACNG3;CACNA2D3;CACNA1C;CACNA1A;PDE4B;CACNA1B;PDE4D;SCN1A;CACNA1D;CACNB4;SCN2A;CATSPER2;CACNB2;SCN8A;SCN3A	SSTHGF
1036	GO_Cellular_Component_2023__Neuron Projection (GO:0043005)	0.115425	1.94814	0	0.100598	0.903	130/264	31.69%	SHANK3;MAPK8IP3;CDH2;SEMA6A;HRH2;TMEM266;MARK2;KNDC1;EPHA10;CDH13;EPHA6;LRRK2;PRKAA1;EPHB1;GLRA2;ADGRL1;SPAST;CNTNAP2;ANKS1A;FGF13;SCN9A;ABL1;BIN1;CHRM3;CRIPT;SHANK2;SHTN1;TENM4;DTNBP1;MAP1A;BRINP3;SLC8A1;ANK1;SPTBN4;TENM3;GRIA1;SACS;IL1RAPL1;RAPGEF2;GRIK3;KCNB2;SLC6A6;SLC8A3;ALCAM;SLC6A1;ADGRL2;SNCA;FYN;KCNB1;DSCAML1;NFASC;MAGI2;GABRA2;ADCY8;GABRB1;RGS7;GABRG3;NTRK2;TENM2;HCN1;DLG2;ADGRL3;SYT1;K…	SSTHGF
1037	GO_Biological_Process_2023__Plasma Membrane Bounded Cell Projection Organization (GO:0120036)	0.19793	1.93855	0.00460829	0.102325	0.913	36/62	32.22%	FLRT3;NEDD4;ULK1;CNTNAP2;TPM1;BICDL1;OPHN1;SH3GL2;DTNBP1;RAPGEF2;RAB6A;RB1;RYK;TTC17;GPM6A;TMEM108;MAP2;FRY;WDPCP;PTPRM;APP;MAPT;NLGN1;PPP1R9A;CAMSAP1;HMGB1;GSK3B;VPS13B;FRYL;TBC1D24;ATXN10;KIFAP3;DOCK7;LGI1;ARMC2;VAPA	SSTHGF
1038	GO_Biological_Process_2023__Proton Transmembrane Transport (GO:1902600)	-0.42437	-1.93529	0.00931677	0.105409	0.991	11/18	25.69%	ATP6V1D;ATP6V1F;ATP6V1E1;ATP6V1C1;SLC9A8;ATP6V1B2;ATP6V0B;ATP6AP2;ATP1A1;SLC36A1;ATP5F1B	SSTHGF
1039	GO_Biological_Process_2023__Nitrogen Compound Transport (GO:0071705)	-0.290906	-1.93477	0.00810811	0.104162	0.991	39/47	56.24%	ATP11B;SLC43A2;RALBP1;SLC5A8;SNX7;NRG1;VAMP2;TOM1;HSP90B1;SLC7A8;SLC12A2;KIF3A;ARRDC3;SLC36A1;ABCC1;TMEM30A;ARL6IP5;SLC7A1;RUFY1;SLC1A4;ABCD4;HIKESHI;SLC3A2;FLVCR1;SNX4;SLC19A2;SLC38A1;SCARB2;CERT1;SLC38A2;SLC16A10;CHMP2B;RAB7A;SCAMP1;SLC23A2;SLC35F3;SCAMP5;SLC13A3;MIA3	SSTHGF
1040	GO_Biological_Process_2023__Calcium Ion Import Across Plasma Membrane (GO:0098703)	0.373895	1.93382	0.00940439	0.101717	0.918	13/17	32.66%	SCN9A;SLC8A1;SLC8A3;CACNA1C;CACNA1A;NALF1;CACNA1B;SCN1A;SLC24A2;CACNA1D;SCN2A;SCN8A;SCN3A	SSTHGF
1041	GO_Molecular_Function_2023__GTP Binding (GO:0005525)	-0.270631	-1.93349	0.00645995	0.103406	0.992	34/58	36.26%	RAB21;ARL5B;GTPBP10;RIT2;ARL4C;RAP1B;RAB14;DIRAS2;ARF1;ARL3;DYNC1LI1;RAP2A;ARL6;RAB11A;CDC42;TUBA1B;ANXA6;MFHAS1;RRAS2;GLUD1;RHOQ;ADSS2;TUBA1A;RALA;MTG2;ATL2;SRP54;TUBE1;LANCL2;EEF1A1;RAB31;RAB22A;ARL8B;RAB5A	SSTHGF
1042	GO_Biological_Process_2023__Intracellular Protein Transport (GO:0006886)	-0.19662	-1.93156	0.00111857	0.102966	0.992	94/155	46.00%	RAB21;ARL5B;CSE1L;E2F3;RAB18;RAB5B;LAMP2;TMED10;CLIP3;SEC23IP;ARL4C;RAB14;YWHAH;AP4E1;ARF1;PPP1R10;TSG101;LMAN1;SAR1B;COPB2;SNX1;RAB6B;STX16;ARL6;FUT10;KPNA4;SMURF1;IPO8;KPNA5;ARFGAP3;MAIP1;SYNDIG1;HPS4;STAM;IPO11;NPM1;SNX27;PKD1;VPS26A;IPO7;COG7;CTTN;SNX8;NUP214;NUP88;DESI1;SLU7;KPNB1;USO1;STX17;CLTC;SEPTIN9;EIF2D;NAPG;XPO6;RAB1A;STX1B;KIF13A;TNPO1;HSPA9;ARFIP1;STX3;RAB31;TECPR2;RAB22A;XPO1;AP2A…	SSTHGF
1043	KEGG_2021_Human__Serotonergic synapse	0.244271	1.92869	0	0.0985707	0.922	25/42	28.87%	GNAI1;GNG7;MAP2K1;GNG2;GNG4;ADCY5;PLCB1;KCNN2;CACNA1C;GABRB1;CACNA1A;BRAF;PRKCA;KCND2;CACNA1B;KCNJ3;PRKACB;CACNA1D;GABRB3;APP;TRPC1;GABRB2;GNAQ;KCNJ6;PLCB4	SSTHGF
1044	MSigDB_Hallmark_2020__Glycolysis	-0.261777	-1.91456	0.0025641	0.114026	0.996	40/60	45.05%	ARPP19;PKM;RPE;ME1;SLC25A13;GOT2;ENO1;IRS2;HS6ST2;UGP2;AK3;COPB2;DCN;DLD;PGAM1;STMN1;PPIA;PGK1;ENO2;SOD1;PFKP;PDK3;QSOX1;P4HA1;GLCE;PAXIP1;SDHC;PLOD2;PPFIA4;PYGB;GOT1;NDUFV3;PC;ERO1A;NASP;FUT8;AGL;ALDH7A1;HDLBP;HOMER1	SSTHGF
1045	GO_Biological_Process_2023__Oxidative Phosphorylation (GO:0006119)	-0.382762	-1.91263	0.00702247	0.113791	0.996	17/23	40.10%	UQCRB;UQCRH;NDUFA12;NDUFV1;NDUFA5;NDUFS5;NDUFC1;NIPSNAP2;ATP5MG;UQCRC2;NDUFS4;ATP5F1B;SDHC;NDUFV3;UQCRC1;TEFM;NDUFB9	SSTHGF
1046	GO_Biological_Process_2023__Actomyosin Structure Organization (GO:0031032)	0.287608	1.89484	0.003367	0.109284	0.947	25/28	58.91%	EPB41L4B;ACTN2;EPB41L2;TPM1;PHACTR1;EPB41L4A;EPB41L1;FRMD5;SORBS1;TJP1;CDC42BPA;FHOD3;ROCK2;ARRB1;CUL3;EPB41L5;TMOD2;FAM171A1;PDCD10;ITGB1;CDC42BPB;MYH10;FRMD3;EPB41L3;TMOD3	SSTHGF
1047	KEGG_2021_Human__MAPK signaling pathway	0.150246	1.88648	0	0.111706	0.953	72/113	43.74%	FGF9;MAPK8IP3;PTPN5;CHUK;MAP2K1;MKNK1;MRAS;RASGRP1;TAB1;NFATC3;MAPKAPK5;FGF2;MAP3K3;CACNG7;MAP4K4;RAP1A;CACNG3;RPS6KA6;PTPRR;RASGRF2;STK4;RASA1;RAPGEF2;ECSIT;TAOK3;ERBB4;NLK;CACNA2D3;CACNA1C;CACNA1A;NTRK2;BRAF;SOS1;PRKCA;CACNA1B;MAPK10;MAP4K3;RPS6KA2;AKT3;PRKACB;CACNA1D;MEF2C;CACNB4;PPP3CA;MAPT;NF1;RASA2;IGF1R;MAP2K4;CACNB2;TAB2;MAX;INSR;TRAF6;MAP2K6;TAOK1;MAPK9;PLA2G4C;MAP3K7;MAP3K13;MAPK8;CACNA…	SSTHGF
1048	GO_Biological_Process_2023__Generation Of Neurons (GO:0048699)	0.183141	1.8855	0	0.109433	0.953	47/66	47.07%	MARK2;MAP2K1;FGF13;OPHN1;CDK6;ASTN1;SDCCAG8;IL1RAPL1;RAPGEF2;FUT9;SH3RF1;SPOCK1;RYK;AUTS2;NTRK2;ADGRL3;ATP2B2;GPM6A;ASTN2;MYT1L;RTN3;NRCAM;MARK1;MEF2C;NLGN4X;DTNB;USP9X;MAPT;DNER;RTN4;NAV1;CEP85L;RTN1;PAFAH1B1;KIAA0319;NEO1;MAP1B;ACSL4;MYEF2;PTPRD;NOVA2;THOC2;LDB1;KIAA0319L;CIT;DCX;RAC1	SSTHGF
1049	KEGG_2021_Human__Morphine addiction	0.21302	1.88309	0.00429185	0.108218	0.953	45/50	65.66%	PDE1A;GNAI1;GNG7;GNG2;ADCY9;GNG4;ADCY5;GABRA2;ADCY8;GABRB1;GABRG3;CACNA1A;PRKCA;PDE4B;CACNA1B;PDE4D;KCNJ3;PRKACB;GABRB3;PDE8A;GABRB2;KCNJ6;GABBR2;PDE7A;PDE10A;GNB1;GRK4;ADCY1;GABRG2;PDE3B;ARRB1;GNAO1;GRK5;GABBR1;GNAS;GRK3;PDE4A;GNAI3;GABRA4;GABRA1;GABRA3;GNB5;GABRG1;ADCY3;GNB4	SSTHGF
1050	WikiPathway_2023_Human__PI3K AKT mTOR Signaling Pathway And Therapeutic Opportunities In Prostate Cancer WP3844	0.368897	1.87873	0.00882353	0.108238	0.959	15/17	49.64%	PDK1;ULK1;RPTOR;MAPKAP1;RB1CC1;GSK3B;PTEN;GRB10;RICTOR;FOXO3;RHEB;PIK3CB;MTOR;PIK3CA;KRAS	SSTHGF
1051	MSigDB_Hallmark_2020__Xenobiotic Metabolism	-0.295657	-1.87842	0.00527009	0.139151	0.997	27/40	42.96%	DHRS7;PGRMC1;ARPP19;PTGES3;BCAT1;GART;TMBIM6;ENTPD5;GABARAPL1;SAR1B;ABCD2;NMT1;SPINT2;ELOVL5;IGF1;ETFDH;CSAD;MPP2;HPRT1;CYFIP2;GSR;ATP2A2;PTS;RAP1GAP;PC;ACO2;ALDH2	SSTHGF
1052	WikiPathway_2023_Human__Metabolic Epileptic Disorders WP5355	-0.337078	-1.87786	0.00566572	0.137688	0.997	17/29	30.91%	GLDC;PKM;GAPDH;GOT2;ENO1;DLD;PGAM1;BTD;PGK1;ENO2;PFKP;HADH;MPC1;GLUD1;DLAT;ASS1;GOT1	SSTHGF
1053	GO_Biological_Process_2023__Regulation Of I-kappaB kinase/NF-kappaB Signaling (GO:0043122)	-0.261301	-1.87069	0.00750939	0.142604	0.999	28/58	28.47%	RIOK3;BIRC2;NDFIP2;GAPDH;PARP1;TRIM13;TFG;USP20;UFL1;STAT1;PRKD1;TFRC;SIRT1;DAB2IP;AKAP13;MIER1;TBK1;MID2;OTUD7B;PDPK1;DDX1;UBE2N;PPM1A;DHX15;DHX36;PRKCB;OPTN;RIPK1	SSTHGF
1054	GO_Cellular_Component_2023__Mitochondrial Inner Membrane (GO:0005743)	-0.204867	-1.86618	0.00806452	0.142823	0.999	67/114	43.19%	UQCRB;UQCRH;COX7C;SLC25A3;SLC25A13;TMEM65;AGK;SLC25A21;COX7A2L;COX5A;COX11;NDUFA12;TIMMDC1;ATP5MJ;COX4I1;MRS2;GHITM;NDUFV1;NDUFA5;ATP5F1A;PDE2A;NDUFS5;ALDH18A1;NDUFC1;CLU;PTCD3;IMMT;MAIP1;MPC1;ATP5MG;HADHA;UQCRC2;MRPL3;APOO;ETFDH;PSEN1;NDUFS4;MRPL33;MTG2;ATP5F1B;HSPD1;DAP3;COX5B;SDHC;COX6B1;MRPS9;NDUFV3;CYCS;UQCRC1;SLC25A27;AIFM1;GPD2;TAMM41;NDUFAF5;MCU;ATP5MC2;AFG3L2;MRPL19;CLPX;RPS3;NDUFB9;COX1…	SSTHGF
1055	GO_Biological_Process_2023__Regulation Of Notch Signaling Pathway (GO:0008593)	-0.353269	-1.86248	0.00825309	0.144208	0.999	22/27	49.62%	TM2D3;ZMIZ1;SYNJ2BP;DTX1;IL6ST;PRKCI;TSPAN14;TP63;ITGB1BP1;YTHDF2;WWP2;STAT3;ZBTB7A;NEURL1;SREBF2;EPN2;CCNC;PDCD10;BMP2K;FBXW7;CD46;POGLUT1	SSTHGF
1056	GO_Biological_Process_2023__Positive Regulation Of Protein Localization To Nucleus (GO:1900182)	-0.398261	-1.85164	0.0089955	0.1526	0.999	13/19	34.01%	EIF2AK3;PARK7;TFRC;CCT6A;KAT7;PIK3R1;PPP3CB;CCT3;PSEN1;EFCAB7;CREBBP;CCT4;CCT8	SSTHGF
1057	MSigDB_Hallmark_2020__UV Response Dn	0.167624	1.85087	0.00558659	0.120616	0.972	65/76	64.29%	MGMT;CDON;CAP2;SPOP;NR1D2;PRDM2;PRKAR2B;BCKDHB;AMPH;TOGARAM1;ADGRL2;FYN;MAGI2;CACNA1A;MMP16;PRKCA;PRKCE;KALRN;KCNMA1;AKT3;CELF2;ATXN1;DLG1;PTPRM;INPP4B;TJP1;APBB2;CDC42BPA;SYNE1;PHF3;PTEN;RASA2;NIPBL;ATRX;PLCB4;IGF1R;ADD3;SIPA1L1;SCN8A;ICA1;DLC1;CDK13;MAP1B;NR3C1;ACVR2A;BMPR1A;NRP1;GRK5;MAP2K5;NFKB1;ATP2C1;MRPS31;ARHGEF9;DYRK1A;PPARG;ATRN;MAPK14;ANXA4;RND3;PEX14;SCAF8;YTHDC1;WDR37;SFMBT1;MGLL	SSTHGF
1058	GO_Molecular_Function_2023__Ubiquitin-Like Protein Ligase Binding (GO:0044389)	-0.202055	-1.84299	0.00563063	0.157951	0.999	60/127	33.59%	OTUB1;MOAP1;RNF8;RPS27A;TMBIM6;SUMO1;GABARAPL2;STAT1;HSPA8;UBE2W;ACTG1;VCP;FANCL;PTPRN;PCBP2;PRKACA;GABARAPL1;CCDC50;TSG101;RPL5;HAPSTR1;JKAMP;HSP90AB1;SKI;DTX1;UBA52;TUBA1B;CUL4B;LAPTM4B;CLU;DNAJA1;UCHL1;TNK2;ITCH;HM13;MFHAS1;SMAD5;STAM;UBE2N;MAP1LC3A;ZNF746;HSP90AA1;HIF1A;SPOPL;RALA;LRPPRC;ARIH1;HSPD1;ATXN3;MDM2;RIPK1;APBB1;YWHAE;NAE1;SMC6;HSPA9;VCL;GLMN;PRKAR1A;FAF2	SSTHGF
1059	GO_Biological_Process_2023__Regulation Of Protein-Containing Complex Assembly (GO:0043254)	-0.276217	-1.84236	0.0091623	0.154891	0.999	18/46	18.06%	TRAF3IP1;RIOK3;SUMO1;PARK7;HSPA8;TFRC;VCP;DAB2IP;PRKCZ;NRG1;FARP2;SAR1B;VPS39;CDC42;DDX3X;CLU;SVIP;SEPTIN8	SSTHGF
1060	GO_Biological_Process_2023__Negative Regulation Of Binding (GO:0051100)	-0.346985	-1.83574	0.00849858	0.153627	0.999	19/27	40.12%	TLE5;TMBIM6;SUMO1;PARK7;CSNK1E;CTNNBIP1;LRPAP1;SYMPK;HABP4;KDM1A;PIN1;ITGB1BP1;WAPL;ROCK1;ILRUN;GOLGA2;BTAF1;SORL1;PEX14	SSTHGF
1061	GO_Molecular_Function_2023__Guanyl Ribonucleotide Binding (GO:0032561)	-0.237106	-1.83372	0.00997506	0.152198	0.999	38/69	36.26%	RAB21;ARL5B;GTPBP10;RIT2;RAB18;RAB5B;ARL4C;RAP1B;RAB14;DIRAS2;ARF1;ARL3;DYNC1LI1;RAP2A;PDE2A;ARL6;RAB11A;CDC42;TUBA1B;ANXA6;MFHAS1;RRAS2;GLUD1;RHOQ;ADSS2;TUBA1A;RAB12;RALA;MTG2;ATL2;SRP54;TUBE1;LANCL2;EEF1A1;RAB31;RAB22A;ARL8B;RAB5A	SSTHGF
1062	WikiPathway_2023_Human__Myometrial Relaxation And Contraction Pathways WP289	-0.239423	-1.83097	0.00735294	0.153416	0.999	19/67	11.36%	CAMK2B;GABPB1;RGS4;GUCY1A1;RGS17;PKIB;CALD1;CALM2;ITPR2;PRKD1;ACTG1;YWHAQ;RGS11;ACTB;YWHAH;PRKCZ;PRKACA;CALM3;CAMK2A	SSTHGF
1063	GO_Biological_Process_2023__Neurogenesis (GO:0022008)	0.345223	1.81823	0.00895522	0.140873	0.984	16/18	53.06%	CDK5RAP2;EPHB1;BTBD1;CDK6;ERBB4;SPOCK1;RYK;MAPT;KAT8;BTBD3;THOC2;TRAK2;CIT;FAT4;METTL14;TRAK1	SSTHGF
1064	GO_Biological_Process_2023__Neuron Differentiation (GO:0030182)	0.201936	1.8046	0	0.13692	0.986	33/47	44.75%	CTNNB1;MAP2K1;UGDH;OPHN1;TENM4;BRINP3;TENM3;IL1RAPL1;ERBB4;FUT9;SPOCK1;RYK;PBX1;NTRK2;TENM2;ATP2B2;TENM1;MYT1L;RTN3;MEF2C;NLGN4X;DTNB;ATP8A2;RTN4;RTN1;WNK1;ACSL4;MYEF2;PTPRD;NOVA2;THOC2;LRP6;LDB1	SSTHGF
1065	GO_Biological_Process_2023__Positive Regulation Of Synaptic Transmission (GO:0050806)	0.22454	1.78138	0.00735294	0.145416	0.99	22/37	31.31%	SHANK3;CLSTN2;LGMN;SHANK2;EIF2AK4;CACNG7;DTNBP1;CACNG3;SLC8A3;GRIK2;ADCY8;SYT1;GRIN2B;NALCN;RIMS2;SLC24A2;RIMS1;APP;NLGN1;CLSTN1;NRXN1;LGI1	SSTHGF
1066	GO_Biological_Process_2023__Response To Unfolded Protein (GO:0006986)	-0.381443	-1.76244	0.0091047	0.205642	1	12/19	32.17%	TMBIM6;PTPN1;HSPA8;DAB2IP;HSP90AB1;DNAJA1;HSP90AA1;HSPD1;HSPH1;TRAM1;OPTN;TM7SF3	SSTHGF
1067	WikiPathway_2023_Human__Cytoplasmic Ribosomal Proteins WP477	-0.58998	-3.77399	0	0	0	71/87	29.02%	RPS27A;RPS4X;RPS26;RPL3;RPS2;RPL18A;RPL8;FAU;RPL10A;RPS13;RPS21;RPS15;RPL7A;RPL26;RPL41;RPS16;RPS3A;RPL29;RPS5;RPS18;RPL13A;RPL27;RPL13;RPL35;RPS9;RPS12;RPS23;RPS17;RPL11;RPS7;RPS11;RPL15;RPL10;RPL12;RPLP0;RPL19;RPS10;RPL9;RPL35A;RPL7;RPL18;RPS28;RPL23;RPL32;RPLP1;RPL6;RPL36;RPL21;UBA52;RPL24;RPS27;RPS8;RPL14;RPL39;RPLP2;RPL23A;RPSA;RPS14;RPL28;RPS15A;RPL38;RPL34;RPS25;RPS6;RPL27A;RPL5;RPL4;RPL17…	PVALB
1068	GO_Biological_Process_2023__Cytoplasmic Translation (GO:0002181)	-0.585477	-3.75816	0	0	0	73/92	27.26%	RPS27A;RPS4X;RPS26;RPL3;RPS2;RPL18A;RPL36AL;RPL8;FAU;RPL10A;MRPS12;RPS13;RPS21;RPS15;RPL22L1;RPL7A;RPL26;RPL41;RPS16;RPS3A;RPL29;RPS5;RPS18;RPL13A;RPL27;RPL13;RPL35;RPS9;RPS23;RPS17;RPL11;RPS7;RPS11;RPL15;RPL10;RPL12;RPLP0;RPL19;RPS10;RPL9;RPL35A;RPL7;RPL18;RPS28;RPL32;RPLP1;RPL6;RPL36;RPL21;UBA52;RPL24;RPS27;RPS8;RPL14;RPL39;RPLP2;RPL23A;RPSA;RPS14;RPL28;RPS15A;RPL38;RPL34;RPS25;RPS6;EIF3I;EIF4A…	PVALB
1069	KEGG_2021_Human__Ribosome	-0.516754	-3.60325	0	0	0	107/130	37.04%	MRPL12;RPS27A;RPS4X;RPS26;RPL3;RPS2;RPL18A;MRPL36;RPL36AL;RPL36A-HNRNPH2;RPL8;MRPL24;FAU;RPL10A;MRPS12;RPS13;RPS21;RPS15;RPL22L1;RPL7A;RPL26;RPL41;RPS16;RPS3A;RPL29;MRPL28;RPS5;RPS18;RPL13A;RPL27;RPL13;MRPS7;RPL35;RPS9;MRPL17;RPS12;RPS23;RPS17;RPL11;RPS7;RPS11;RPL15;RPL10;RPL12;RPLP0;RPL19;RPS10;RPL9;RPL35A;RPL7;RPL18;MRPL27;MRPS17;RPS28;RPL23;RPL32;RPLP1;RPL6;RPL36;RPL21;UBA52;RPL24;RPS27;RPS8;R…	PVALB
1070	GO_Cellular_Component_2023__Large Ribosomal Subunit (GO:0015934)	-0.603136	-3.29766	0	0	0	40/48	27.06%	RPL3;RPL18A;RPL36AL;RPL8;RPL10A;RPL7A;RPL26;RPL41;RPL29;RPL13A;RPL27;RPL13;RPL35;RPL11;RPL15;RPL12;RPLP0;RPL19;RPL9;RPL35A;RPL7;RPL18;RPL32;RPLP1;RPL6;RPL36;RPL21;UBA52;RPL24;RPL14;RPL39;RPLP2;RPL23A;RPL28;RPL38;RPL34;RPL27A;RPL5;RPL4;RPL17	PVALB
1071	GO_Cellular_Component_2023__Cytosolic Large Ribosomal Subunit (GO:0022625)	-0.603136	-3.29766	0	0	0	40/48	27.06%	RPL3;RPL18A;RPL36AL;RPL8;RPL10A;RPL7A;RPL26;RPL41;RPL29;RPL13A;RPL27;RPL13;RPL35;RPL11;RPL15;RPL12;RPLP0;RPL19;RPL9;RPL35A;RPL7;RPL18;RPL32;RPLP1;RPL6;RPL36;RPL21;UBA52;RPL24;RPL14;RPL39;RPLP2;RPL23A;RPL28;RPL38;RPL34;RPL27A;RPL5;RPL4;RPL17	PVALB
1072	GO_Biological_Process_2023__Peptide Biosynthetic Process (GO:0043043)	-0.457436	-3.25822	0	0	0	108/145	37.04%	MRPL12;RPS27A;RPS4X;RPS26;RPL3;RPS2;RPL18A;MRPL36;RPL36AL;RPL8;MRPL24;CARNS1;FAU;RPL10A;MRPS12;RPS13;RPS21;RPS15;RPL7A;RPL26;RPL41;RPS16;RPS3A;RPL29;MRPL28;MRPL51;GGTA1;RPS5;RPS18;RPL13A;RPL27;RPL13;MRPS7;RPL35;RPS9;MRPL55;RPS23;RPS17;RPL11;RPS7;RPS11;RPL15;RPL10;RPL12;PCSK1;RPLP0;RPL19;RPS10;RPL9;RPL35A;RPL7;RPL18;MRPL27;MRPS17;GSPT2;RPS28;RPL32;RPLP1;RPL6;RPL36;EEF1A2;RPL21;MRPL43;RPL24;RPS27;R…	PVALB
1073	GO_Biological_Process_2023__Macromolecule Biosynthetic Process (GO:0009059)	-0.431091	-3.15461	0	0	0	119/172	35.88%	EIF5A;MRPL12;RPS27A;RPS4X;RPS26;RPL3;RPS2;RPL18A;MRPL36;TYMS;RPL36AL;GAL3ST4;RPL8;MRPL24;FAU;EEF1B2;RPL10A;MRPS12;RPS13;RPS21;RPS15;INHBA;RPL7A;RPL26;RPL41;RPS16;RPS3A;RPL29;TUFM;MRPL28;MRPL51;RPS5;RPS18;RPL13A;RPL27;RPL13;MRPS7;RPL35;RPS9;MRPL55;RPS23;RPS17;RPL11;RPS7;RPS11;RPL15;RPL10;RPL12;RPLP0;RPL19;RPS10;RPL9;RPL35A;RPL7;RPL18;MRPL27;COL5A1;MRPS17;GSPT2;RPS28;RPL32;RPLP1;RPL6;RPL36;EEF1A2;R…	PVALB
1074	GO_Cellular_Component_2023__Ribosome (GO:0005840)	-0.545868	-3.12319	0	0	0	37/57	22.28%	RPS4X;RPS26;RPL18A;RPL36AL;RPL8;RPL10A;MRPS12;RPS13;RPS21;RPL7A;RPL41;RPS5;RPS18;RPL13A;RPL27;MRPS7;RPS9;RPS23;RPS17;RPL11;RPS7;RPS11;RPL15;RPL19;RPS10;RPL9;RPL18;RPS28;BTF3;RPL32;RPL6;RPL36;RPL24;RPS27;RPL39;RPL38;RPS25	PVALB
1075	GO_Biological_Process_2023__Aerobic Electron Transport Chain (GO:0019646)	-0.527127	-3.10888	0	0	0	54/64	39.21%	COX8A;COX6A1;NDUFB10;NDUFB8;NDUFC2;COX7C;UQCC3;COX5B;COX4I1;UQCR10;UQCRQ;NDUFA2;NDUFB2;CYC1;NDUFB7;NDUFS7;UQCR11;COX6B1;NDUFA4;UQCRHL;NDUFB3;UQCRFS1;NDUFV1;NDUFS5;NDUFA1;NDUFB5;NDUFA7;NDUFA6;COX7A2;NDUFS3;NDUFAB1;NDUFA3;UQCRB;UQCRH;NDUFS8;NDUFS6;CYCS;NDUFV2;UQCRC1;NDUFB9;COX5A;NDUFS2;COX7B;SDHAF2;NDUFB4;SDHD;NDUFC1;NDUFA8;NDUFA5;SLC25A51;COX6C;NDUFA9;NDUFAF1;SDHA	PVALB
1076	GO_Biological_Process_2023__Translation (GO:0006412)	-0.407477	-3.10369	0	0	0	149/225	37.04%	GADD45GIP1;EIF5A;MRPL54;MRPS34;MRPL12;MRPL40;AURKAIP1;RPS27A;RPS4X;RPS26;CHCHD1;RPL3;RPS2;RPL18A;MRPL36;RPL36AL;RPL8;MRPL24;FAU;EEF1B2;RPL10A;MRPS12;RPS13;RPS21;RPS15;RPL22L1;RPL7A;RPL26;RPL41;MRPL53;RPS16;RPS3A;MRPL57;RPL29;TUFM;MRPL28;MRPL51;RPS5;RPS18;RPL13A;RPL27;RPL13;MRPS7;RPL35;RPS9;MRPL17;MRPL55;RPS23;RPS17;RPL11;RPS7;RPS11;RPL15;MRPS24;RPL10;RPL12;RPLP0;RPL19;RPS10;RPL9;RPL35A;RPL7;RPL18…	PVALB
1077	WikiPathway_2023_Human__Electron Transport Chain OXPHOS System In Mitochondria WP111	-0.484835	-3.10131	0	0	0	63/88	33.94%	COX8A;COX6A1;ATP5F1D;NDUFA13;NDUFB10;NDUFB8;NDUFC2;NDUFA11;ATP5MC1;COX7C;COX5B;SLC25A5;COX4I1;UQCR10;ATP5PF;UQCRQ;COX7A1;ATP5IF1;NDUFA2;ATP5PO;NDUFB2;ATP5MC3;NDUFB7;NDUFS7;UQCR11;COX6B1;NDUFA4;ATP5ME;SLC25A4;NDUFB3;UQCRFS1;NDUFV1;ATP5F1E;NDUFS5;NDUFA1;NDUFB5;SURF1;NDUFA7;ATP5PD;NDUFA6;COX7A2;NDUFS3;ATP5MF;NDUFAB1;NDUFA3;UQCRB;UQCRH;NDUFS8;NDUFS6;NDUFV2;UQCRC1;NDUFB9;COX5A;NDUFS2;COX7B;ATP5F1B;NDU…	PVALB
1078	GO_Cellular_Component_2023__Small Ribosomal Subunit (GO:0015935)	-0.601114	-3.06036	0	0	0	34/38	33.64%	RPS27A;RPS4X;RPS26;RPS2;FAU;MRPS12;RPS13;RPS21;RPS15;RPS16;RPS3A;RPS5;RPS18;RPS9;RPS23;RPS17;RPS7;RPS11;RPS10;RPS28;UBA52;RPS27;RPS8;RPSA;RPS14;RPS15A;RPS25;RPS6;RPS24;RPS4Y1;RPS19;RACK1;RPS20;MRPS6	PVALB
1079	GO_Cellular_Component_2023__Cytosolic Small Ribosomal Subunit (GO:0022627)	-0.607637	-3.0541	0	0	0	33/37	32.85%	RPS27A;RPS4X;RPS26;RPS2;FAU;MRPS12;RPS13;RPS21;RPS15;RPS16;RPS3A;RPS5;RPS18;RPS9;RPS23;RPS17;RPS7;RPS11;RPS10;RPS28;UBA52;RPS27;RPS8;RPSA;RPS14;RPS15A;RPS25;RPS6;RPS24;RPS4Y1;RPS19;RACK1;RPS20	PVALB
1080	GO_Biological_Process_2023__Mitochondrial ATP Synthesis Coupled Electron Transport (GO:0042775)	-0.510704	-3.04392	0	0	0	50/66	33.94%	COX8A;COX6A1;NDUFB10;NDUFB8;NDUFC2;COX7C;UQCC3;COX5B;COX4I1;UQCR10;UQCRQ;NDUFA2;NDUFB2;CYC1;NDUFB7;NDUFS7;UQCR11;COX6B1;NDUFA4;UQCRHL;NDUFB3;UQCRFS1;NDUFV1;NDUFS5;NDUFA1;NDUFB5;NDUFA7;NDUFA6;COX7A2;NDUFS3;NDUFAB1;NDUFA3;UQCRB;UQCRH;NDUFS8;NDUFS6;CYCS;NDUFV2;UQCRC1;NDUFB9;COX5A;NDUFS2;COX7B;SDHAF2;NDUFB4;SDHD;NDUFC1;NDUFA12;NDUFA8;NDUFA5	PVALB
1081	GO_Molecular_Function_2023__Oxidoreduction-Driven Active Transmembrane Transporter Activity (GO:0015453)	-0.537256	-2.99058	0	0	0	42/52	33.94%	COX8A;NDUFB10;NDUFB8;NDUFC2;COX7C;COX5B;COX4I1;UQCR10;COX7A1;NDUFA2;NDUFB2;NDUFB7;NDUFS7;COX6B1;NDUFA4;CYB561D2;UQCRHL;NDUFB3;NDUFV1;NDUFS5;NDUFA1;NDUFB5;NDUFA7;NDUFA6;NDUFS3;NDUFA3;UQCRB;UQCRH;NDUFS8;NDUFS6;NDUFV2;UQCRC1;NDUFB9;COX5A;NDUFS2;COX7B;NDUFB4;NDUFC1;NDUFA12;CYB561A3;NDUFA8;NDUFA5	PVALB
1082	KEGG_2021_Human__Oxidative phosphorylation	-0.428094	-2.88254	0	0	0	72/110	33.94%	COX8A;COX6A1;ATP5F1D;NDUFB11;NDUFA13;ATP6V1F;NDUFB10;NDUFB8;NDUFC2;NDUFA11;ATP5MC1;COX7C;COX5B;COX4I1;UQCR10;ATP5PF;UQCRQ;COX7A1;NDUFA2;ATP5PO;NDUFB2;CYC1;ATP6V0C;ATP5MC3;NDUFB7;NDUFS7;UQCR11;COX6B1;NDUFA4;ATP6V0B;ATP5ME;NDUFA4L2;UQCRHL;NDUFB3;ATP6V1C2;UQCRFS1;NDUFV1;ATP5F1E;NDUFS5;NDUFA1;NDUFB5;NDUFA7;ATP6AP1;ATP5PD;NDUFA6;COX7A2;NDUFS3;ATP6V1G2;ATP5MF;NDUFAB1;NDUFA3;UQCRB;UQCRH;NDUFS8;NDUFS6;ND…	PVALB
1083	WikiPathway_2023_Human__Oxidative Phosphorylation WP623	-0.516917	-2.87204	0	0	0	39/51	33.94%	ATP5F1D;NDUFB10;NDUFB8;NDUFC2;NDUFA11;ATP5MC1;ATP5PF;NDUFA2;ATP5PO;NDUFB2;ATP5MC3;NDUFB7;NDUFS7;NDUFA4;ATP5ME;NDUFA4L2;NDUFV1;ATP5F1E;NDUFS5;NDUFB5;NDUFA7;ATP6AP1;ATP5PD;NDUFA6;NDUFS3;ATP5MF;NDUFAB1;NDUFA3;NDUFS8;NDUFS6;NDUFV2;NDUFB9;NDUFS2;ATP5F1B;ATP6AP2;NDUFB4;NDUFC1;NDUFA8;NDUFA5	PVALB
1084	GO_Biological_Process_2023__Proton Motive Force-Driven Mitochondrial ATP Synthesis (GO:0042776)	-0.508156	-2.86584	0	0	0	39/52	33.94%	ATP5F1D;NDUFB11;NDUFA13;NDUFB10;NDUFB8;NDUFC2;NDUFA11;ATP5PF;NDUFA2;ATP5PO;NDUFB2;NDUFB7;NDUFS7;ATP5ME;NDUFB3;NDUFV1;ATP5F1E;NDUFS5;NDUFA1;NDUFB5;NDUFA7;ATP5PD;NDUFA6;NDUFS3;ATP5MF;NDUFAB1;NDUFA3;NDUFS8;NDUFS6;NDUFV2;NDUFB9;NDUFS2;ATP5F1B;NDUFB4;SDHD;NDUFC1;NDUFA12;NDUFA8;NDUFA5	PVALB
1085	GO_Biological_Process_2023__Oxidative Phosphorylation (GO:0006119)	-0.488708	-2.85228	0	0	0	44/60	35.32%	ATP5F1D;NDUFB11;NDUFA13;NDUFB10;NDUFB8;NDUFC2;NDUFA11;ATP5PF;NDUFA2;CHCHD10;ATP5PO;NDUFB2;NDUFB7;NDUFS7;ATP5ME;NDUFB3;NDUFV1;ATP5F1E;NDUFS5;NDUFA1;NDUFB5;NDUFA7;ATP5PD;NDUFA6;NDUFS3;ATP5MF;NDUFAB1;NDUFA3;UQCRB;UQCRH;NDUFS8;NDUFS6;NDUFV2;UQCRC1;NDUFB9;NDUFS2;ATP5F1B;NDUFB4;SDHD;NDUFC1;NDUFA12;NDUFA8;NDUFA5;SLC25A51	PVALB
1086	GO_Biological_Process_2023__Sensory Perception Of Bitter Taste (GO:0050913)	0.584938	2.84406	0	0.00189947	0.003	15/20	16.68%	GNAT3;TAS2R43;TAS2R3;TAS2R19;GNAT2;TAS2R8;RTP5;LPO;TAS2R46;TAS2R50;TAS2R13;TAS2R10;TAS2R30;TAS2R4;TAS2R14	PVALB
1087	GO_Biological_Process_2023__Detection Of Chemical Stimulus Involved In Sensory Perception Of Bitter Taste (GO:0001580)	0.584938	2.84406	0	0.00189947	0.003	15/20	16.68%	GNAT3;TAS2R43;TAS2R3;TAS2R19;GNAT2;TAS2R8;RTP5;LPO;TAS2R46;TAS2R50;TAS2R13;TAS2R10;TAS2R30;TAS2R4;TAS2R14	PVALB
1088	GO_Biological_Process_2023__Cellular Respiration (GO:0045333)	-0.452778	-2.82186	0	0	0	50/83	27.64%	COX8A;COX6A1;NDUFB11;NDUFA13;NDUFB10;NDUFB8;NDUFC2;NDUFA11;BLOC1S1;COX7C;COX5B;COX4I1;UQCR10;UQCRQ;NDUFA2;NDUFB2;CYC1;NDUFB7;NDUFS7;UQCR11;COX6B1;NDUFA4;ETFB;MTLN;NR4A3;NDUFB3;UQCRFS1;NDUFV1;NDUFS5;NDUFA1;NDUFB5;SURF1;NDUFA7;NDUFA6;COX7A2;NDUFS3;NDUFAB1;NDUFA3;UQCRB;UQCRH;NDUFS8;NDUFS6;CYCS;NDUFV2;CHCHD5;UQCRC1;NDUFB9;COX5A;NDUFS2;COX7B	PVALB
1089	GO_Biological_Process_2023__Proton Motive Force-Driven ATP Synthesis (GO:0015986)	-0.485275	-2.81506	0	0	0	43/59	33.94%	ATP5F1D;NDUFB11;NDUFA13;NDUFB10;NDUFB8;NDUFC2;NDUFA11;ATP5MC1;ATP5PF;NDUFA2;ATP5PO;NDUFB2;ATP5MC3;NDUFB7;NDUFS7;ATP5MJ;ATP5ME;NDUFB3;ATP5MK;NDUFV1;ATP5F1E;NDUFS5;NDUFA1;NDUFB5;NDUFA7;ATP5PD;NDUFA6;NDUFS3;ATP5MF;NDUFAB1;NDUFA3;NDUFS8;NDUFS6;NDUFV2;NDUFB9;NDUFS2;ATP5F1B;NDUFB4;SDHD;NDUFC1;NDUFA12;NDUFA8;NDUFA5	PVALB
1090	GO_Biological_Process_2023__Detection Of Chemical Stimulus Involved In Sensory Perception Of Taste (GO:0050912)	0.558615	2.79965	0	0.00295473	0.007	16/22	16.68%	GNAT3;TAS2R43;TAS2R3;TAS2R19;GNAT2;TAS2R8;RTP5;LPO;TAS2R46;TAS2R50;TAS2R13;TAS2R10;TAS2R30;PKD1L3;TAS2R4;TAS2R14	PVALB
1091	GO_Cellular_Component_2023__Polysomal Ribosome (GO:0042788)	-0.612803	-2.78631	0	0	0	19/27	21.57%	RPS26;RPL18A;RPL36AL;RPL8;RPL10A;RPS21;RPL7A;RPL41;RPS23;RPL11;RPL19;RPL18;RPS28;RPL32;RPL6;RPL36;RPL24;RPL39;RPL38	PVALB
1092	GO_Biological_Process_2023__Positive Regulation Of Interleukin-6 Production (GO:0032755)	0.392843	2.77555	0	0.00253262	0.008	25/51	17.18%	TLR4;CLEC7A;IL33;SYK;F2RL1;TLR2;TWIST1;F2R;SIGLEC16;POU2AF1;CYBA;LILRA2;TMEM106A;NLRP10;RIGI;IFIH1;NOS2;PLCG2;IL17RA;TLR6;TLR1;TNFSF4;IL16;POU2F2;MAPK13	PVALB
1093	GO_Molecular_Function_2023__NADH Dehydrogenase (Quinone) Activity (GO:0050136)	-0.542258	-2.65743	0	3.94325e-05	0.001	27/34	33.94%	NDUFB10;NDUFB8;NDUFC2;NDUFA2;NDUFB2;NDUFB7;NDUFS7;NDUFA4;NDUFB3;NDUFV1;NDUFS5;NDUFB5;NDUFA7;NDUFA6;NDUFS3;NDUFA3;NDUFS8;NDUFS6;NDUFV2;NDUFB9;NQO1;NDUFS2;NDUFB4;NDUFC1;NDUFA12;NDUFA8;NDUFA5	PVALB
1094	KEGG_2021_Human__Coronavirus disease	-0.359535	-2.64657	0	3.77895e-05	0.001	102/179	29.25%	C7;TLR7;RPS27A;RPS4X;RPS26;RPL3;RPS2;RPL18A;RPL36AL;MASP1;C1QB;RPL36A-HNRNPH2;RPL8;FAU;RPL10A;RPS13;RPS21;RPS15;RPL22L1;RPL7A;RPL26;RPL41;SELP;ACE2;RPS16;RPS3A;NRP1;RPL29;PRKCG;RPS5;RPS18;RPL13A;RPL27;RPL13;RPL35;RPS9;C3;RPS12;RPS23;RPS17;RPL11;RPS7;RPS11;RPL15;RPL10;RPL12;RPLP0;RPL19;RPS10;NLRP3;RPL9;RPL35A;RPL7;RPL18;ISG15;C6;RPS28;FOS;RPL23;RPL32;RPLP1;RPL6;RPL36;RPL21;UBA52;IKBKE;JUN;RPL24;RP…	PVALB
1095	GO_Molecular_Function_2023__NADH Dehydrogenase (Ubiquinone) Activity (GO:0008137)	-0.538633	-2.62229	0	3.62779e-05	0.001	26/33	33.94%	NDUFB10;NDUFB8;NDUFC2;NDUFA2;NDUFB2;NDUFB7;NDUFS7;NDUFA4;NDUFB3;NDUFV1;NDUFS5;NDUFB5;NDUFA7;NDUFA6;NDUFS3;NDUFA3;NDUFS8;NDUFS6;NDUFV2;NDUFB9;NDUFS2;NDUFB4;NDUFC1;NDUFA12;NDUFA8;NDUFA5	PVALB
1096	WikiPathway_2023_Human__Mitochondrial Complex I Assembly Model OXPHOS System WP4324	-0.470487	-2.58222	0	3.48826e-05	0.001	34/50	33.94%	NDUFB11;NDUFA13;NDUFB10;NDUFAF3;NDUFB8;NDUFC2;NDUFA2;NDUFB2;NDUFB7;NDUFB3;NDUFV1;NDUFS5;NDUFA1;NDUFB5;NDUFA7;NDUFA6;NDUFS3;TMEM70;NDUFAB1;NDUFA3;NDUFS6;DMAC1;NDUFV2;FOXRED1;DMAC2;NDUFB9;NDUFS2;TMEM186;NDUFAF4;NDUFB4;NDUFC1;NDUFA12;NDUFA8;NDUFA5	PVALB
1097	GO_Cellular_Component_2023__Mitochondrial Respiratory Chain Complex I (GO:0005747)	-0.496401	-2.57569	0	3.2391e-05	0.001	31/41	33.94%	NDUFB11;NDUFA13;NDUFB10;NDUFB8;NDUFC2;NDUFA11;NDUFA2;NDUFB2;NDUFB7;NDUFS7;NDUFA4;NDUFB3;NDUFV1;NDUFS5;NDUFA1;NDUFB5;NDUFA7;NDUFA6;NDUFS3;NDUFAB1;NDUFA3;NDUFS8;NDUFS6;NDUFV2;NDUFB9;NDUFS2;NDUFB4;NDUFC1;NDUFA12;NDUFA8;NDUFA5	PVALB
1098	GO_Cellular_Component_2023__Respiratory Chain Complex I (GO:0045271)	-0.496401	-2.57569	0	3.2391e-05	0.001	31/41	33.94%	NDUFB11;NDUFA13;NDUFB10;NDUFB8;NDUFC2;NDUFA11;NDUFA2;NDUFB2;NDUFB7;NDUFS7;NDUFA4;NDUFB3;NDUFV1;NDUFS5;NDUFA1;NDUFB5;NDUFA7;NDUFA6;NDUFS3;NDUFAB1;NDUFA3;NDUFS8;NDUFS6;NDUFV2;NDUFB9;NDUFS2;NDUFB4;NDUFC1;NDUFA12;NDUFA8;NDUFA5	PVALB
1099	GO_Biological_Process_2023__Mitochondrial Electron Transport, NADH To Ubiquinone (GO:0006120)	-0.518121	-2.55685	0	3.12741e-05	0.001	26/34	33.94%	NDUFB10;NDUFB8;NDUFC2;NDUFA2;NDUFB2;NDUFB7;NDUFS7;NDUFA4;NDUFB3;NDUFV1;NDUFS5;NDUFB5;NDUFA7;NDUFA6;NDUFS3;NDUFAB1;NDUFA3;NDUFS8;NDUFS6;NDUFV2;NDUFB9;NDUFS2;NDUFB4;NDUFC1;NDUFA8;NDUFA5	PVALB
1100	GO_Cellular_Component_2023__Mitochondrial Inner Membrane (GO:0005743)	-0.312089	-2.55332	0	3.02316e-05	0.001	235/346	47.80%	COX8A;GADD45GIP1;COX6A1;ATP5F1D;NDUFB11;NDUFA13;HCRT;MRPL54;SCO2;MRPS34;MRPL12;NDUFB10;MRPL40;COA3;AURKAIP1;NDUFAF3;NDUFB8;NDUFC2;NDUFA11;ATP5MC1;BOK;BCS1L;COX7C;UQCC3;COX5B;SLC25A5;CHCHD1;COX4I1;TMEM160;SHMT2;UQCR10;MRPL36;TYMS;MICOS13;MRPL24;ATP5PF;UQCRQ;LDHB;MRPS12;NDUFA2;PRODH;ATP5PO;NDUFB2;CYP1A1;CYC1;ATP5MC3;PLA2G4A;TIMM13;PHB2;MRPL53;NDUFB7;ENDOG;MRPL57;MRPL28;SMDT1;MRPL51;UQCR11;MPV17L2;A…	PVALB
1101	GO_Biological_Process_2023__Aerobic Respiration (GO:0009060)	-0.444535	-2.53421	0	2.92564e-05	0.001	39/58	35.32%	ATP5F1D;NDUFB11;NDUFA13;NDUFB10;NDUFB8;NDUFC2;NDUFA11;BLOC1S1;NDUFA2;CHCHD10;NDUFB2;NDUFB7;NDUFS7;NDUFB3;NDUFV1;NDUFS5;NDUFA1;NDUFB5;SURF1;NDUFA7;NDUFA6;NDUFS3;NDUFAB1;NDUFA3;UQCRB;UQCRH;NDUFS8;NDUFS6;NDUFV2;UQCRC1;NDUFB9;NDUFS2;NDUFB4;NDUFC1;NDUFA12;NDUFA8;NDUFA5;MDH2;SLC25A51	PVALB
1102	GO_Biological_Process_2023__Neuropeptide Signaling Pathway (GO:0007218)	-0.481934	-2.52576	0	8.50263e-05	0.003	21/42	10.90%	NPPA;SSTR1;NPY;NTSR1;MCHR1;PENK;NTSR2;NXPH3;OPRM1;OPRL1;NMUR2;GPR149;KISS1R;SSTR2;NMUR1;MCHR2;NPSR1;NMU;GPR37;HCRTR2;PNOC	PVALB
1103	GO_Biological_Process_2023__Mitochondrial Respiratory Chain Complex Assembly (GO:0033108)	-0.393864	-2.51474	0	8.24498e-05	0.003	67/87	47.63%	SDHAF1;COX14;NDUFB11;NDUFA13;SCO2;NDUFB10;COA3;NDUFAF3;NDUFB8;NDUFC2;NDUFA11;BCS1L;UQCC3;PET117;NDUFA2;PET100;NDUFB2;NDUFB7;NDUFS7;NDUFB3;UQCRFS1;NDUFS5;NDUFA1;NDUFB5;SURF1;NDUFA6;NDUFS3;COX16;NDUFAB1;TMEM126A;NDUFA3;NDUFS8;NDUFAF8;DMAC1;COA8;FOXRED1;DMAC2;CHCHD4;NDUFB9;NDUFS2;CHCHD7;TMEM186;SDHAF2;NDUFAF4;NDUFB4;COX17;NDUFC1;OMA1;NDUFA8;NDUFA5;TMEM223;SMIM20;SDHAF3;NDUFA9;NDUFAF1;COX20;NDUFB1;TM…	PVALB
1104	WikiPathway_2023_Human__GPCRs Class A Rhodopsin Like WP455	-0.363289	-2.50272	0	0.000133375	0.005	71/122	25.18%	NPFFR2;P2RY1;GPR17;CHRM2;OR1F1;HTR2C;P2RY13;SSTR1;CMKLR1;NTSR1;MCHR1;NTSR2;GPR171;OPRM1;OPRL1;MC5R;NMUR2;HTR1D;OPN1SW;CNR2;TRHR;DRD1;CHRM3;GPR18;SSTR2;NMUR1;ADRA1A;CX3CR1;OR3A2;PTGIR;DRD3;P2RY6;LPAR4;PTGER3;FPR2;GPR37;HCRTR2;FPR3;ADRA1B;HTR2A;GPR34;OR7C1;FPR1;P2RY14;TBXA2R;P2RY12;GPR3;GPR161;CNR1;PTAFR;CHRM1;ACKR2;GPR37L1;HRH2;GPR27;GALR1;EDNRB;MC1R;CHRM4;ACKR3;ACKR4;OR3A3;ADORA2B;NPY1R;HTR6;HTR2…	PVALB
1105	GO_Biological_Process_2023__Positive Regulation Of Tumor Necrosis Factor Production (GO:0032760)	0.349311	2.48079	0	0.0215273	0.078	21/55	11.76%	TLR4;CLEC7A;IL33;SYK;TLR2;TWIST1;OAS2;OAS1;CYBA;LILRA2;OAS3;TMEM106A;THBS1;RIGI;FZD5;AMH;IFIH1;LY96;FRMD8;PLCG2;TLR1	PVALB
1106	GO_Biological_Process_2023__Calcium Ion Transmembrane Import Into Cytosol (GO:0097553)	0.324333	2.4694	0	0.020261	0.085	38/71	22.86%	SLC24A4;SLC8A2;F2R;DRD2;CACNA1F;PLCE1;CACNA1E;SCN5A;SCN7A;TRPV4;NALF2;CACNA1S;JPH2;CACNA1I;PLCG2;FLNA;SLC24A1;RYR1;PLCH1;CHERP;GRIN2A;CACNA1G;TRPV1;JPH1;CACNA1A;PLCB4;PLCH2;SCN11A;RYR2;GRIN1;GRIN2D;SCN3A;ITPR1;CACNA1B;JPH4;JPH3;PLCG1;CACNA1C	PVALB
1107	KEGG_2021_Human__Parkinson disease	-0.323465	-2.46463	0	0.000362779	0.012	118/219	34.02%	COX8A;PSMB6;COX6A1;ATP5F1D;NDUFB11;NDUFA13;NDUFB10;PSMC5;SLC18A2;NDUFB8;NDUFC2;NDUFA11;TUBB1;ATP5MC1;RPS27A;COX7C;COX5B;SLC25A5;COX4I1;UQCR10;ATP5PF;UQCRQ;UBB;COX7A1;DRD1;NDUFA2;ATP5PO;NDUFB2;TUBA1A;CALML4;CYC1;ATP5MC3;TUBA3D;NDUFB7;TUBB2A;NDUFS7;UQCR11;SNCA;COX6B1;GPR37;NDUFA4;DUSP1;NDUFA4L2;SLC25A4;RYR3;UQCRHL;NDUFB3;PARK7;UQCRFS1;NDUFV1;TUBA4A;ATP5F1E;NDUFS5;NDUFA1;HSPA5;NDUFB5;BAX;DDIT3;PSMD8…	PVALB
1108	MSigDB_Hallmark_2020__Oxidative Phosphorylation	-0.327082	-2.46143	0	0.000377895	0.013	150/197	53.19%	COX8A;COX6A1;ATP5F1D;HSD17B10;CASP7;ATP6V1F;TIMM8B;GPX4;TOMM22;NDUFB8;NDUFC2;ATP5MC1;COX7C;COX5B;SLC25A5;COX4I1;UQCR10;ATP5PF;UQCRQ;LDHB;MRPS12;NDUFA2;ATP5PO;NDUFB2;CYC1;ATP6V0C;ATP5MC3;TIMM13;PHB2;NDUFB7;NDUFS7;UQCR11;COX6B1;TIMM10;NDUFA4;LDHA;ATP6V0B;ETFB;ATP5ME;SLC25A4;ECH1;IDH3B;NDUFB3;UQCRFS1;NDUFV1;ATP5F1E;NDUFA1;SLC25A11;NDUFB5;BAX;SURF1;NDUFA7;ATP6AP1;ATP5PD;NDUFA6;COX7A2;NDUFS3;HCCS;ATP5…	PVALB
1109	GO_Biological_Process_2023__Energy Derivation By Oxidation Of Organic Compounds (GO:0015980)	-0.47994	-2.4492	0	0.00046573	0.017	24/38	27.64%	COX8A;COX6A1;COX7C;COX5B;COX4I1;UQCR10;UQCRQ;CYC1;UQCR11;COX6B1;NDUFA4;MTLN;ADGRF5;NR4A3;MRAP2;MT3;COX7A2;UQCRB;UQCRH;CYCS;CHCHD5;UQCRC1;COX5A;COX7B	PVALB
1110	GO_Molecular_Function_2023__Bitter Taste Receptor Activity (GO:0033038)	0.571923	2.44264	0	0.0222509	0.111	11/15	16.68%	TAS2R43;TAS2R3;TAS2R19;TAS2R8;TAS2R46;TAS2R50;TAS2R13;TAS2R10;TAS2R30;TAS2R4;TAS2R14	PVALB
1111	GO_Biological_Process_2023__Mitochondrial Respiratory Chain Complex I Assembly (GO:0032981)	-0.433077	-2.44151	0	0.000465101	0.018	34/53	33.94%	NDUFB11;NDUFA13;NDUFB10;NDUFAF3;NDUFB8;NDUFC2;NDUFA11;BCS1L;NDUFA2;NDUFB2;NDUFB7;NDUFS7;NDUFB3;NDUFS5;NDUFA1;NDUFB5;NDUFA6;NDUFS3;NDUFAB1;TMEM126A;NDUFA3;NDUFS8;NDUFAF8;DMAC1;FOXRED1;DMAC2;NDUFB9;NDUFS2;TMEM186;NDUFAF4;NDUFB4;NDUFC1;NDUFA8;NDUFA5	PVALB
1112	GO_Biological_Process_2023__NADH Dehydrogenase Complex Assembly (GO:0010257)	-0.433077	-2.44151	0	0.000465101	0.018	34/53	33.94%	NDUFB11;NDUFA13;NDUFB10;NDUFAF3;NDUFB8;NDUFC2;NDUFA11;BCS1L;NDUFA2;NDUFB2;NDUFB7;NDUFS7;NDUFB3;NDUFS5;NDUFA1;NDUFB5;NDUFA6;NDUFS3;NDUFAB1;TMEM126A;NDUFA3;NDUFS8;NDUFAF8;DMAC1;FOXRED1;DMAC2;NDUFB9;NDUFS2;TMEM186;NDUFAF4;NDUFB4;NDUFC1;NDUFA8;NDUFA5	PVALB
1113	GO_Biological_Process_2023__Regulation Of Interleukin-6 Production (GO:0032675)	0.305134	2.44062	0	0.0197861	0.113	28/79	11.76%	TLR4;CLEC7A;ELF4;IL33;SYK;F2RL1;TLR2;TWIST1;F2R;C5AR2;SIGLEC16;POU2AF1;CYBA;LILRA2;TMEM106A;NLRP10;PTPN6;NCKAP1L;RIGI;IFIH1;GHRL;NOS2;NMBR;PLCG2;IL17RA;PTPN22;TLR6;TLR1	PVALB
1114	KEGG_2021_Human__Prion disease	-0.313398	-2.43311	0	0.000566842	0.023	108/236	26.61%	COX8A;PSMB6;CAV1;COX6A1;ATP5F1D;NDUFB11;NDUFA13;HSPA6;NDUFB10;PSMC5;C7;NDUFB8;NDUFC2;NDUFA11;TUBB1;ATP5MC1;HSPA8;COX7C;COX5B;SLC25A5;COX4I1;UQCR10;NOTCH1;C1QB;CREB3L3;ATP5PF;CREB3L4;UQCRQ;COX7A1;NDUFA2;ATP5PO;NDUFB2;GRIN2C;TUBA1A;CYC1;PRKCD;ATP5MC3;TUBA3D;CREB5;NDUFB7;TUBB2A;NDUFS7;UQCR11;COX6B1;CREB3;NDUFA4;HSPA1B;NDUFA4L2;SLC25A4;RYR3;CAV3;NCAM2;UQCRHL;NDUFB3;UQCRFS1;HSPA1L;NDUFV1;TUBA4A;ATP5F1…	PVALB
1115	KEGG_2021_Human__Neuroactive ligand-receptor interaction	-0.315516	-2.41615	0	0.000818465	0.034	108/219	24.57%	CORT;NPFFR2;P2RY1;SST;CHRM2;CALCR;HTR2C;P2RY13;GLP1R;CRH;HCRT;SSTR1;NPY;POMC;NTSR1;MCHR1;LPAR1;MLN;PENK;NTSR2;CHRNB1;OPRM1;S1PR2;OPRL1;MC5R;NMUR2;APLN;CALCRL;HTR1D;UTS2;P2RX5;GLRA3;CNR2;GRIK4;TRHR;TACR3;RXFP1;VIP;DRD1;CHRM3;GRIN2C;TSPO;KISS1R;SSTR2;NMB;NMUR1;MCHR2;VIPR1;ADRA1A;RXFP2;GRID2;PTGIR;CHRND;GABRG1;CHRNB3;GNRHR;TAC1;DRD3;P2RY6;CCK;LPAR4;PTGER3;FPR2;NMU;ADM;HCRTR2;S1PR5;FPR3;ADRA1B;HTR2A;…	PVALB
1116	GO_Biological_Process_2023__Regulation Of Tumor Necrosis Factor Production (GO:0032680)	0.284354	2.37763	0	0.0257483	0.16	29/88	11.76%	TLR4;CLEC7A;ELF4;IL33;SYK;TLR2;TWIST1;OAS2;C5AR2;OAS1;CYBA;LILRA2;OAS3;TMEM106A;PTPN6;THBS1;VSIR;RIGI;FZD5;AMH;IFIH1;LY96;GHRL;FRMD8;PLCG2;PTPN22;CACTIN;RARA;TLR1	PVALB
1117	GO_Biological_Process_2023__Regulation Of T Cell Mediated Cytotoxicity (GO:0001914)	-0.573652	-2.37645	0	0.00138202	0.059	14/20	20.46%	HLA-DRA;CD1D;HLA-C;PTPRC;IL12RB1;FADD;HLA-B;KLRC1;RAET1E;HLA-E;MICA;IL23A;HLA-A;HLA-DRB1	PVALB
1118	GO_Cellular_Component_2023__Voltage-Gated Calcium Channel Complex (GO:0005891)	0.368455	2.37552	0	0.0231735	0.16	23/40	24.32%	CACHD1;CACNA1F;CATSPERB;CACNG6;CACNA1E;SCN5A;SCN7A;CACNA2D4;CATSPERD;CACNA1S;CACNA1I;CATSPERG;CACNA1G;CACNA1A;CACNB2;CACNG3;SCN11A;SCN3A;CACNA1B;CACNA1C;CATSPERE;CACNA2D2;CACNG7	PVALB
1119	GO_Cellular_Component_2023__Organelle Inner Membrane (GO:0019866)	-0.285085	-2.3669	0	0.0015397	0.067	242/370	47.80%	COX8A;GADD45GIP1;COX6A1;ATP5F1D;NDUFB11;NDUFA13;HCRT;MRPL54;SCO2;MRPS34;MRPL12;NDUFB10;MRPL40;COA3;AURKAIP1;NDUFAF3;NDUFB8;NDUFC2;NDUFA11;ATP5MC1;BOK;BCS1L;COX7C;UQCC3;COX5B;SLC25A5;CHCHD1;COX4I1;TMEM160;SHMT2;UQCR10;MRPL36;TYMS;MICOS13;MRPL24;ATP5PF;UQCRQ;LDHB;MRPS12;NDUFA2;PRODH;ATP5PO;NDUFB2;CYP1A1;CYC1;PTGS2;ATP5MC3;PLA2G4A;TIMM13;PHB2;MRPL53;NDUFB7;ENDOG;MRPL57;MRPL28;SMDT1;MRPL51;UQCR11;MPV…	PVALB
1120	KEGG_2021_Human__Systemic lupus erythematosus	-0.421024	-2.36077	0	0.00160777	0.072	29/51	22.90%	HLA-DRA;C7;CD86;H2AC15;C1QB;H2BC18;H3C1;H4C3;H2BC4;H2AC20;HLA-DOB;HLA-DQB1;H2BC11;H2BC21;H4C5;C3;H2AC8;H2AZ1;H2AC6;C6;H2AX;H4C8;SNRPB;H2AJ;HLA-DRB1;H3-3B;H2BC15;CD80;HLA-DPB1	PVALB
1121	GO_Molecular_Function_2023__High Voltage-Gated Calcium Channel Activity (GO:0008331)	0.471698	2.35328	0.00316456	0.0256716	0.191	12/20	22.86%	CACNA1F;CACNA1E;SCN5A;SCN7A;CACNA1S;CACNA1I;CACNA1G;CACNB2;SCN11A;SCN3A;CACNA1B;CACNA1C	PVALB
1122	WikiPathway_2023_Human__Eicosanoid Synthesis WP167	-0.578747	-2.34202	0	0.0018542	0.083	13/19	17.85%	PLA2G5;PTGES;ALOX5AP;ALOX5;PTGS2;PLA2G4A;PTGDS;PRXL2B;ALOX12;TBXAS1;PTGS1;PTGIS;LTC4S	PVALB
1123	GO_Biological_Process_2023__Sensory Perception Of Smell (GO:0007608)	0.457525	2.3403	0	0.0257483	0.202	12/24	10.78%	SYT10;SLC24A4;OR2T8;DRD2;OR6A2;CNGB1;OR2AG2;OR9Q1;OR2M4;OR2M2;OR2M3;OR2L13	PVALB
1124	GO_Molecular_Function_2023__Voltage-Gated Calcium Channel Activity (GO:0005245)	0.360639	2.33755	0	0.0239625	0.204	23/41	24.32%	CACNA1F;CACNG6;CACNA1E;TMC1;SCN5A;SCN7A;CACNA2D4;CACNA1S;CACNA1I;ITGAV;RYR1;CACNA1G;TRPV1;CACNA1A;CACNB2;CACNG3;TPCN2;SCN11A;SCN3A;CACNA1B;CACNA1C;CACNA2D2;CACNG7	PVALB
1125	GO_Biological_Process_2023__Regulation Of Blood Coagulation (GO:0030193)	0.423084	2.3344	0	0.0231554	0.214	12/26	7.90%	F2RL1;SERPINE1;F2R;KNG1;HPSE;TFPI;CEL;EDN1;F2;EMILIN2;THBS1;NRG1	PVALB
1126	GO_Molecular_Function_2023__Neuropeptide Binding (GO:0042923)	-0.627257	-2.33229	0	0.00199134	0.091	10/15	10.12%	SSTR1;MCHR1;GPR171;OPRM1;OPRL1;NMUR2;GPR149;SSTR2;NMUR1;GPR37	PVALB
1127	GO_Molecular_Function_2023__Receptor Ligand Activity (GO:0048018)	-0.316518	-2.32083	0	0.0023735	0.109	92/177	27.09%	NPPA;SST;NTF3;ALKAL2;CRH;VGF;NDP;WNT7B;POMC;BMP6;SEMA3C;GDF9;SEMA3D;FGF5;CD86;GDF7;APLN;NODAL;MDK;WNT8A;SEMA5B;WNT8B;DPP4;VIP;GREM1;WNT16;EREG;INHBA;NMB;ANGPTL3;SEMA3B;SEMA6A;SEMA6D;CSF1;IL11;ALKAL1;CCK;SEMA5A;ARTN;BDNF;PTHLH;CD70;APOA1;PDGFB;TGFA;PSPN;INHBB;GPNMB;VEGFB;BMP8B;FGF10;LEFTY1;PGF;CLEC11A;PTN;EGF;NBL1;BMP7;TNFSF12;WNT10B;IL7;SEMA3E;PGLYRP1;BTC;MSTN;KITLG;JAG1;GDF10;FGF22;SFRP2;BMP8A;W…	PVALB
1128	GO_Biological_Process_2023__Positive Regulation Of Tumor Necrosis Factor Superfamily Cytokine Production (GO:1903557)	0.32145	2.31754	0	0.0246509	0.238	21/58	11.76%	TLR4;CLEC7A;IL33;SYK;TLR2;TWIST1;OAS2;OAS1;CYBA;LILRA2;OAS3;TMEM106A;THBS1;RIGI;FZD5;AMH;IFIH1;LY96;FRMD8;PLCG2;TLR1	PVALB
1129	GO_Cellular_Component_2023__Collagen-Containing Extracellular Matrix (GO:0062023)	-0.292704	-2.30828	0	0.00264526	0.122	142/273	28.90%	NPPA;COL6A5;FBN2;SERPINH1;TNC;FBLN1;COL9A2;VCAN;NDP;SMOC1;MATN4;TINAGL1;VWA1;ANXA2;MFGE8;SPON1;MXRA5;ELN;LOX;RARRES2;FGFBP3;AZGP1;COL21A1;MMRN1;MMP23B;MDK;WNT8A;COL4A5;FREM3;C1QB;NPNT;PCOLCE;FREM2;COL8A1;COL5A3;THBS2;COL16A1;LOXL4;GREM1;COL3A1;FGL2;THSD4;LOXL3;ADAMTS4;ANGPTL3;MGP;SFRP1;NID2;SEMA3B;HPX;COL11A1;CCDC80;SSC5D;LGALS1;VWA2;SERPINE2;EFEMP2;MST1;SPARC;APOA1;ADAMTS20;ADAMTS8;LTBP1;CD151;C…	PVALB
1130	WikiPathway_2023_Human__Nonalcoholic Fatty Liver Disease WP4396	-0.328503	-2.29862	0	0.00288742	0.133	81/132	39.98%	COX8A;COX6A1;NDUFB11;NDUFA13;CASP7;NDUFB10;CEBPA;NDUFB8;NDUFC2;NDUFA11;COX7C;COX5B;COX4I1;UQCR10;UQCRQ;COX7A1;NDUFA2;NDUFB2;CYC1;NDUFB7;NDUFS7;UQCR11;COX6B1;NDUFA4;NDUFA4L2;UQCRHL;NDUFB3;UQCRFS1;NDUFV1;NDUFS5;NDUFA1;NDUFB5;BAX;DDIT3;ATF4;NDUFA7;NDUFA6;COX7A2;NDUFS3;JUN;ERN1;NDUFAB1;NDUFA3;UQCRB;UQCRH;NDUFS8;CASP8;NDUFS6;CYCS;RELA;MLX;NDUFV2;UQCRC1;NDUFB9;COX5A;BBC3;NDUFS2;TGFB1;COX7B;XBP1;NDUFB4;…	PVALB
1131	KEGG_2021_Human__Huntington disease	-0.289083	-2.29254	0	0.00299293	0.139	118/280	26.61%	COX8A;PSMB6;COX6A1;ATP5F1D;NDUFB11;NDUFA13;GPX1;NDUFB10;PSMC5;NDUFB8;NDUFC2;NDUFA11;TUBB1;ATP5MC1;GPX3;POLR2J;COX7C;POLR2I;COX5B;POLR2K;SLC25A5;COX4I1;UQCR10;POLR2L;CREB3L3;ATP5PF;CREB3L4;UQCRQ;COX7A1;KCNJ10;NDUFA2;ATP5PO;NDUFB2;TUBA1A;TBPL2;SLC1A3;CYC1;ATP5MC3;TUBA3D;CREB5;NDUFB7;TUBB2A;GPX2;PLCB2;NDUFS7;UQCR11;BDNF;DNAI2;COX6B1;CREB3;NDUFA4;DCTN3;NDUFA4L2;DNAL4;SLC25A4;UQCRHL;NDUFB3;UQCRFS1;DNA…	PVALB
1132	GO_Molecular_Function_2023__Hormone Activity (GO:0005179)	-0.462019	-2.2838	0	0.00330769	0.158	24/37	23.96%	CORT;NPPA;SST;CRH;VGF;HCRT;NPY;POMC;PENK;APLN;VIP;INHBA;NMB;CCK;PTHLH;PNOC;INHBB;NPPC;UCN;CHGB;SPX;INSL6;GNRH1;METRNL	PVALB
1133	GO_Molecular_Function_2023__Neuropeptide Activity (GO:0160041)	-0.618333	-2.27631	0	0.00354223	0.172	10/15	10.90%	CORT;NPPA;CRH;HCRT;NPY;PENK;VIP;NMB;CCK;PNOC	PVALB
1134	GO_Molecular_Function_2023__Neuropeptide Hormone Activity (GO:0005184)	-0.618333	-2.27631	0	0.00354223	0.172	10/15	10.90%	CORT;NPPA;CRH;HCRT;NPY;PENK;VIP;NMB;CCK;PNOC	PVALB
1135	KEGG_2021_Human__Non-alcoholic fatty liver disease	-0.323469	-2.26501	0	0.00387972	0.192	82/136	39.98%	COX8A;COX6A1;NDUFB11;NDUFA13;CASP7;NDUFB10;CEBPA;NDUFB8;NDUFC2;NDUFA11;COX7C;COX5B;COX4I1;UQCR10;UQCRQ;COX7A1;NDUFA2;NDUFB2;CYC1;NDUFB7;NDUFS7;UQCR11;COX6B1;NDUFA4;NDUFA4L2;UQCRHL;NDUFB3;UQCRFS1;NDUFV1;NDUFS5;NDUFA1;NDUFB5;BAX;DDIT3;FOS;ATF4;NDUFA7;NDUFA6;COX7A2;NDUFS3;JUN;ERN1;NDUFAB1;NDUFA3;UQCRB;UQCRH;NDUFS8;CASP8;NDUFS6;MAPK11;CYCS;RELA;MLX;NDUFV2;UQCRC1;NDUFB9;COX5A;MAPK12;NDUFS2;TGFB1;COX7B…	PVALB
1136	GO_Biological_Process_2023__Response To Zinc Ion (GO:0010043)	0.475681	2.25962	0	0.0356942	0.341	10/19	12.94%	MT1M;MT1G;MT1E;MT1F;MT2A;MT1X;SLC30A8;HAAO;GLRA1;P2RX4	PVALB
1137	GO_Molecular_Function_2023__Neuropeptide Receptor Activity (GO:0008188)	-0.508102	-2.24634	0.00149477	0.00479858	0.233	14/25	10.21%	SSTR1;NTSR1;MCHR1;NTSR2;GPR171;OPRM1;NMUR2;TACR3;KISS1R;SSTR2;NMUR1;NPSR1;GPR37;HCRTR2	PVALB
1138	GO_Biological_Process_2023__Ribosome Assembly (GO:0042255)	-0.406612	-2.23618	0	0.0050206	0.246	31/46	34.97%	EFNA1;VCX;RPS15;MPV17L2;RPS5;EIF6;MRPS7;RPL11;C1QBP;RPL10;RPLP0;RRS1;RPS28;RPL6;RPS27;RPL23A;RPSA;MRPS2;RPS14;ERAL1;NOP53;RPL5;PPAN;MRPL20;NLE1;RPS19;DHX37;SBDS;RRP7A;NGRN;MRPS11	PVALB
1139	GO_Molecular_Function_2023__Protein Tyrosine Kinase Activity (GO:0004713)	0.273114	2.23009	0	0.043427	0.41	22/85	7.09%	ROS1;EGFR;SYK;PTK6;PDGFRB;FGFR3;WEE2;TXK;STYK1;LYN;MELK;AXL;ROR2;BTK;FRK;ERBB2;MST1R;EPHB4;TNK1;NTRK1;MERTK;ITK	PVALB
1140	GO_Cellular_Component_2023__Mitochondrial Membrane (GO:0031966)	-0.2609	-2.22144	0	0.00563262	0.275	310/498	47.80%	COX8A;GADD45GIP1;SLC22A3;COX6A1;ATP5F1D;NDUFB11;NDUFA13;HCRT;MRPL54;SCO2;MRPS34;MRPL12;NDUFB10;RAB32;MRPL40;VRK2;COA3;AURKAIP1;NDUFAF3;TOMM22;NDUFB8;NDUFC2;NDUFA11;ATP5MC1;GPAT2;BOK;HINT2;RPS27A;BCS1L;COX7C;UQCC3;COX5B;SLC25A5;CHCHD1;COX4I1;TMEM160;SHMT2;UQCR10;MRPL36;TYMS;MICOS13;MRPL24;IFI27L2;ALPL;ATP5PF;UQCRQ;HMOX1;UBB;LDHB;MRPS12;NDUFA2;PRODH;ATP5PO;NDUFB2;TSPO;CYP1A1;CYC1;ATP5MC3;PLA2G4A;TI…	PVALB
1141	KEGG_2021_Human__Leukocyte transendothelial migration	0.267837	2.21997	0	0.0453058	0.434	28/89	13.07%	CLDN34;ITGA4;CDH5;CYBB;SIPA1;ICAM1;MMP2;TXK;CYBA;ESAM;ITGB2;CLDN5;ITGAL;NCF2;RHOH;CLDN10;ITK;EZR;RAPGEF3;MYL5;MSN;PTK2B;PLCG2;PXN;PIK3R2;PIK3CD;CLDN16;OCLN	PVALB
1142	GO_Biological_Process_2023__Response To Type II Interferon (GO:0034341)	0.342686	2.20909	0	0.046387	0.465	15/43	7.68%	TLR4;KYNU;TLR2;GBP1;GBP6;BST2;AQP4;CD40;HLA-DPA1;SLC26A6;IFITM3;CD58;SP100;GBP2;GBP5	PVALB
1143	GO_Molecular_Function_2023__Amino Acid Binding (GO:0016597)	0.38133	2.20213	0.0034965	0.0464103	0.486	17/31	24.69%	GLUD2;GNMT;NOS3;DDAH2;GRIN3A;NOS1;GLRA1;NOS2;SHMT1;GLDC;CASTOR2;AARS2;GRIN1;GLRA2;ASS1;SESN3;SLC7A6	PVALB
[truncated: 1,155 more rows]
