# Supplementary material for: Single-Cell Multi-Modal Differential Analysis of the Human Neo-Cortex in HIV Infection Reveals Similarities with Hallmarks of Alzheimer’s Disease
Source: Research Square preprint supplement (doi:10.21203/rs.3.rs-7636879/v1), 2025-11-01
Supplement: Supplementary file 3 [file 3c2fa1190c933b38264d5fce.xlsx]

## Sheet: Sheet1
	Term	ES	NES	NOM p-val	FDR q-val	FWER p-val	Tag %	Gene %	Lead_genes	cell_type
0	WikiPathway_2023_Human__Cytoplasmic Ribosomal Proteins WP477	-0.520647	-3.4021	0	0	0	75/88	36.87%	RPS4Y1;RPL7A;FAU;RPS26;RPL41;RPL18A;RPL29;RPS2;RPL27;RPL8;RPS18;RPS14;RPS5;RPS15;RPL10A;RPL18;RPL19;RPLP1;RPL10;RPS28;RPS11;RPL24;RPL26;RPL7;RPS27A;UBA52;RPL23A;RPL15;RPS4X;RPL3;RPS7;RPS13;RPS16;RPL13A;RPL9;RPL23;RPS10;RPL11;RPS17;RPS23;RPS21;RPL13;RPS3A;RPL36;RPL28;RPSA;RPL30;RPL35A;RPL38;RPS9;RPL12;RPS12;RPS25;RPLP2;RPS8;RPS27;RPLP0;RPL34;RPS19;RPS15A;RPS6;RPL32;RPS3;RPL6;RPL39;RPL27A;RPL35;RPL…	Oligo
1	GO_Biological_Process_2023__Cytoplasmic Translation (GO:0002181)	-0.508077	-3.29774	0	0	0	76/92	37.39%	RPL7A;FAU;RPS26;RPL36AL;RPL41;RPL18A;MRPS12;RPL29;RPS2;RPL27;RPL8;RPS18;RPS14;RPS5;RPS15;RPL10A;RPL18;RPL19;RPLP1;RPL10;RPL22L1;RPS28;RPS11;RPL24;RPL26;RPL7;RPS27A;UBA52;RPL23A;RPL15;RPS4X;RPL3;RPS7;RPS13;RPS16;RPL13A;RPL9;RPS10;RPL11;RPS17;RPS23;RPS21;RPL13;RPS3A;RPL36;RPL26L1;RPL28;RPSA;RPL30;RPL35A;RPL38;RPS9;RPL12;RPS25;RPLP2;RPS8;RPS27;RPLP0;RPL34;RPS19;RPS15A;RPS6;RPL32;RPS3;RPL6;RPL39;RACK…	Oligo
2	KEGG_2021_Human__Ribosome	-0.455533	-3.26622	0	0	0	102/131	38.11%	RPS4Y1;RPL7A;MRPL12;FAU;MRPS6;RPS26;RPL36AL;RPL41;RPL18A;MRPL17;MRPL34;MRPS12;RPL29;MRPL28;RPS2;RPL27;RPL8;RPS18;RPS14;RPS5;MRPS2;RPS15;RPL10A;RPL18;RPL19;RPLP1;MRPL23;RPL10;RPL22L1;RPS28;RPS11;MRPS17;RPL24;RPL26;RPL7;RPS27A;UBA52;MRPL36;RPL23A;RPL15;RPS4X;RPL3;RPS7;RPS13;RPS16;RPL13A;RPL9;RPL23;RPS10;RPL11;RPS17;RPS23;RPS21;RPL13;RPS3A;MRPL21;RPL36;RPL26L1;RPL28;RPSA;MRPL14;RPL30;RPL35A;RPL38;RP…	Oligo
3	KEGG_2021_Human__Neuroactive ligand-receptor interaction	-0.392905	-3.16232	0	0	0	160/249	27.90%	CRH;SST;CCK;CORT;NPY;PENK;TAC1;VIP;POMC;ADCYAP1;GABRD;GRP;DRD5;CHRM4;RLN2;MCHR1;SSTR3;TACR2;TAC3;P2RX5;HTR5A;NPB;KISS1R;PRSS3;EDN3;DRD1;HTR1A;MCHR2;PDYN;PTH1R;CHRNG;CNR1;HTR1B;CHRNB2;NPY5R;GRM2;NMU;UCN;GAL;GABRG3;PTGER4;SSTR1;P2RX1;GNRHR;MTNR1A;HRH3;GRIN1;NPFF;F2R;CHRM1;GABRR1;HTR2A;GABRA1;TSHR;ADRA1B;CHRNA2;CALCR;NMB;CHRM2;GPR83;UTS2;MAS1;GIPR;F2;VIPR1;GABRA4;VIPR2;THRB;OPRD1;ADRA2A;MC4R;HRH2;CC…	Oligo
4	WikiPathway_2023_Human__Electron Transport Chain OXPHOS System In Mitochondria WP111	-0.474082	-3.0948	0	0	0	62/90	32.39%	COX7A1;UCP1;ATP5MC1;NDUFC2;NDUFA4;COX8A;SLC25A5;COX6A1;NDUFA11;ATP5MC3;NDUFB10;UQCR10;ATP5F1D;COX7A2;NDUFB8;NDUFA13;ATP5PO;COX5B;NDUFB2;SLC25A4;UQCR11;ATP5MF;COX4I1;COX7C;NDUFAB1;SDHD;COX6C;ATP5PF;NDUFB7;NDUFA7;NDUFB3;NDUFS5;NDUFA2;NDUFB5;ATP5ME;NDUFS7;COX6B1;UQCRQ;UQCRB;COX5A;ATP5IF1;UQCRH;UQCRFS1;NDUFS3;ATP5PD;NDUFS8;NDUFA1;COX7B;UCP2;NDUFA3;NDUFA6;NDUFS6;SURF1;NDUFB9;NDUFB1;NDUFA8;NDUFA12;ATP5…	Oligo
5	GO_Cellular_Component_2023__Small Ribosomal Subunit (GO:0015935)	-0.591573	-3.03914	0	0	0	34/38	33.70%	RPS4Y1;FAU;MRPS6;RPS26;MRPS12;RPS2;RPS18;RPS14;RPS5;RPS15;RPS28;RPS11;RPS27A;UBA52;RPS4X;RPS7;RPS13;RPS16;RPS10;RPS17;RPS23;RPS21;RPS3A;RPSA;RPS9;RPS25;RPS8;RPS27;RPS19;RPS15A;RPS6;RPS3;RACK1;RPS20	Oligo
6	GO_Cellular_Component_2023__Cytosolic Large Ribosomal Subunit (GO:0022625)	-0.53395	-3.03453	0	0	0	43/49	36.58%	RPL7A;RPL36AL;RPL41;RPL18A;RPL29;RPL27;RPL8;RPL10A;RPL18;RPL19;RPLP1;RPL24;RPL26;RPL7;UBA52;RPL23A;RPL15;RPL3;RPL13A;RPL9;RPL11;RPL13;RPL36;RPL26L1;RPL28;RPL39L;RPL30;RPL35A;RPL38;RPL12;RPLP2;RPLP0;RPL34;RPL32;RPL6;RPL39;RPL27A;RPL35;RPL21;RPL14;RPL5;RPL37A;RPL4	Oligo
7	GO_Cellular_Component_2023__Large Ribosomal Subunit (GO:0015934)	-0.53395	-3.03453	0	0	0	43/49	36.58%	RPL7A;RPL36AL;RPL41;RPL18A;RPL29;RPL27;RPL8;RPL10A;RPL18;RPL19;RPLP1;RPL24;RPL26;RPL7;UBA52;RPL23A;RPL15;RPL3;RPL13A;RPL9;RPL11;RPL13;RPL36;RPL26L1;RPL28;RPL39L;RPL30;RPL35A;RPL38;RPL12;RPLP2;RPLP0;RPL34;RPL32;RPL6;RPL39;RPL27A;RPL35;RPL21;RPL14;RPL5;RPL37A;RPL4	Oligo
8	GO_Cellular_Component_2023__Cytosolic Small Ribosomal Subunit (GO:0022627)	-0.589242	-2.99896	0	0	0	33/37	33.70%	RPS4Y1;FAU;RPS26;MRPS12;RPS2;RPS18;RPS14;RPS5;RPS15;RPS28;RPS11;RPS27A;UBA52;RPS4X;RPS7;RPS13;RPS16;RPS10;RPS17;RPS23;RPS21;RPS3A;RPSA;RPS9;RPS25;RPS8;RPS27;RPS19;RPS15A;RPS6;RPS3;RACK1;RPS20	Oligo
9	GO_Molecular_Function_2023__Cytokine Receptor Activity (GO:0004896)	0.434032	2.98522	0	0.00115233	0.001	34/60	15.91%	IL1RL1;CD44;IL2RA;CMKLR1;CCR4;EBI3;CD4;IL17RE;IL3RA;IL15RA;IL17RC;IL17RB;IL17RD;CCR3;IL10RA;CNTFR;CSF2RA;IL10RB;PRLR;IL6R;IL1R2;IL4R;GFRA1;IL2RB;FZD4;IL18R1;IL5RA;GPR17;IL11RA;GHR;IL13RA1;IL1R1;IL12RB2;MPL	Oligo
10	GO_Biological_Process_2023__Peptide Biosynthetic Process (GO:0043043)	-0.402408	-2.9636	0	0	0	105/148	38.54%	PCSK1;RPS4Y1;EEF1A2;RPL7A;MRPL12;FAU;MRPS6;RPS26;RPL36AL;RPL41;MRPL55;RPL18A;MRPL34;MRPS12;RPL29;MRPL28;RPS2;RPL27;MRPL51;RPL8;RPS18;RPS14;RPS5;DHPS;RPS15;RPL10A;RPL18;RPL19;RPLP1;MRPL23;RPL10;RPS28;RPS11;MRPS17;MRPL41;RPL24;RPL26;RPL7;RPS27A;MRPL36;RPL23A;RPL15;RPS4X;RPL3;RPS7;RPS13;RPS16;RPL13A;RPL9;RPS10;RPL11;RPS17;RPS23;GSPT2;RPS21;RPL13;RPS3A;RPL36;RPL28;RPSA;MRPL14;RPL30;RPL35A;RPL38;RPS9;…	Oligo
11	GO_Biological_Process_2023__Cellular Respiration (GO:0045333)	-0.460424	-2.95765	0	0	0	57/84	32.39%	COX4I2;NDUFC2;NDUFB11;NDUFA4;COX8A;COX6A1;NDUFA11;NDUFB10;UQCR10;COX7A2;CYC1;NDUFB8;NR4A3;NDUFA13;COX5B;NDUFB2;MTLN;UQCR11;COX4I1;COX7C;BLOC1S1;NDUFAB1;COX6C;NDUFB7;NDUFA7;NDUFB3;NDUFS5;NDUFA2;NDUFB5;NDUFS7;COX6B1;UQCRQ;UQCRB;COX5A;UQCRH;UQCRFS1;NDUFS3;NDUFS8;MDH2;NDUFA1;COX7B;ME3;PPARGC1A;NDUFA3;NDUFA6;NDUFS6;SURF1;CYCS;NDUFB9;NDUFB1;NDUFA8;NDUFA12;CHCHD5;NDUFB4;SLC25A13;ETFB;NDUFC1	Oligo
12	GO_Biological_Process_2023__Mitochondrial ATP Synthesis Coupled Electron Transport (GO:0042775)	-0.481918	-2.92927	0	0	0	46/67	30.25%	COX4I2;NDUFC2;NDUFA4;COX8A;COX6A1;NDUFB10;UQCR10;COX7A2;UQCC3;CYC1;NDUFB8;COX5B;NDUFB2;UQCR11;COX4I1;COX7C;NDUFAB1;SDHD;COX6C;NDUFB7;NDUFA7;NDUFB3;NDUFS5;NDUFA2;NDUFB5;NDUFS7;COX6B1;UQCRQ;UQCRB;COX5A;UQCRH;UQCRFS1;NDUFS3;NDUFS8;NDUFA1;COX7B;COA6;NDUFA3;NDUFA6;NDUFS6;CYCS;NDUFB9;NDUFB1;NDUFA8;NDUFA12;NDUFB4	Oligo
13	GO_Biological_Process_2023__Aerobic Electron Transport Chain (GO:0019646)	-0.475564	-2.89119	0	0	0	44/65	30.25%	COX4I2;NDUFC2;NDUFA4;COX8A;COX6A1;NDUFB10;UQCR10;COX7A2;UQCC3;CYC1;NDUFB8;COX5B;NDUFB2;UQCR11;COX4I1;COX7C;NDUFAB1;SDHD;COX6C;NDUFB7;NDUFA7;NDUFB3;NDUFS5;NDUFA2;NDUFB5;NDUFS7;COX6B1;UQCRQ;UQCRB;COX5A;UQCRH;UQCRFS1;NDUFS3;NDUFS8;NDUFA1;COX7B;NDUFA3;NDUFA6;NDUFS6;CYCS;NDUFB9;NDUFB1;NDUFA8;NDUFB4	Oligo
14	GO_Cellular_Component_2023__Respiratory Chain Complex IV (GO:0045277)	-0.743775	-2.88587	0	0	0	16/17	23.87%	COX8C;COX4I2;NDUFA4;COX8A;COX6A1;COX7A2;COX5B;COX4I1;COX7C;COX6C;NDUFA4L2;COX7B2;COX6B1;COX5A;UQCRFS1;COX7B	Oligo
15	GO_Biological_Process_2023__Chemical Synaptic Transmission (GO:0007268)	-0.354559	-2.87436	0	0	0	127/250	23.72%	CRH;SST;CORT;PNOC;PENK;SNCG;GABRD;DRD5;SLC17A6;SYT5;CHRM4;SLC18A2;GAD2;SLC6A2;CACNB3;CPLX1;HTR5A;SNCB;KCNQ2;HTR1A;SLC12A5;PDYN;SLC32A1;CHRNG;GAD1;CDK5;DOC2A;HTR1B;TSPOAP1;CHRNB2;NPY5R;GRM2;SYN1;KCNA1;GABRG3;CBLN1;PTCHD1;SLC1A6;NSG1;HRH3;GRIN1;NPFF;CHRM1;GABRR1;HTR2A;GABRA1;SLC17A7;CHRNA2;UNC13A;SYN2;CHRM2;UTS2;KCNK3;NRXN1;GABRA4;SLC12A7;LIN7B;HRH2;GABRP;GRIN2B;HTR7;NPTX1;GABRQ;HCRTR2;APOE;SYT1;GA…	Oligo
16	WikiPathway_2023_Human__Oxidative Phosphorylation WP623	-0.515097	-2.84857	0	0	0	45/51	42.92%	ATP5MC1;NDUFC2;NDUFA4;NDUFA11;ATP5MC3;NDUFB10;ATP5F1D;NDUFB8;ATP5PO;NDUFB2;ATP5MF;NDUFAB1;ATP5PF;NDUFB7;NDUFA4L2;NDUFA7;NDUFS5;NDUFA2;NDUFB5;ATP5ME;NDUFS7;NDUFS3;ATP5PD;NDUFS8;ATP6AP1;NDUFA3;ATP6AP2;NDUFA6;NDUFS6;NDUFB9;NDUFB1;NDUFA8;ATP5F1B;NDUFB4;ATP5F1E;ATP5MG;NDUFC1;NDUFV1;ATP5MC2;NDUFS2;NDUFV2;ATP5PB;ATP5F1A;NDUFB6;NDUFA5	Oligo
17	GO_Molecular_Function_2023__Oxidoreduction-Driven Active Transmembrane Transporter Activity (GO:0015453)	-0.499382	-2.83152	0	0	0	47/53	43.26%	COX7A1;COX4I2;NDUFC2;NDUFA4;COX8A;NDUFB10;UQCR10;NDUFB8;COX5B;NDUFB2;COX4I1;COX7C;NDUFB7;NDUFA7;NDUFB3;NDUFS5;CYB561D2;NDUFA2;NDUFB5;NDUFS7;COX6B1;UQCRB;COX5A;UQCRH;NDUFS3;NDUFS8;NDUFA1;COX7B;NDUFA3;NDUFA6;NDUFS6;NDUFB9;NDUFB1;NDUFA8;NDUFA12;NDUFB4;NDUFC1;UQCRC1;NDUFV1;CYBRD1;NDUFS2;NDUFV2;CYB561A3;CYB5A;NDUFB6;NDUFA5;COX7A2L	Oligo
18	KEGG_2021_Human__Prion disease	-0.351767	-2.8307	0	0	0	143/246	34.72%	COX8C;MAPK12;COX7A1;CAV1;EGR1;MAPK11;COX4I2;HSPA1B;ATP5MC1;C6;HSPA1A;NDUFC2;NDUFB11;NDUFA4;IL1B;TUBB2A;HSPA8;COX8A;TUBA4A;SLC25A5;COX6B2;COX6A1;NDUFA11;ATP5MC3;PSMB6;NDUFB10;UQCR10;ATP5F1D;GRIN1;COX7A2;CYC1;NDUFB8;CREB3L3;CAV3;TUBB2B;C1QC;C9;CACNA1S;NDUFA13;C1QA;TUBB4B;CREB3L1;ATP5PO;COX5B;NDUFB2;TUBA3D;GRIN2B;SLC25A4;TUBA1B;CACNA1F;UQCR11;GRIN3B;COX4I1;COX7C;CAV2;TUBB3;NDUFAB1;CSNK2A3;SDHD;COX6C…	Oligo
19	KEGG_2021_Human__Herpes simplex virus 1 infection	0.259816	2.81281	0	0.00345699	0.006	270/461	34.42%	MYD88;HLA-DOB;CCL2;TLR2;BCL2;LTA;ITGA5;IFNG;HLA-DQA1;TNFRSF1A;OAS3;TLR3;ZNF716;HLA-F;ZNF729;ZNF560;IFNA6;ZNF534;IFNA2;IL12A;ZNF229;CGAS;ITGB3;SOCS3;ZNF547;ZNF442;NFKBIA;TAP1;FAS;ZNF726;ZNF709;ZNF816;EIF4EBP1;ZNF404;HLA-E;TICAM1;C3;ZNF763;ZNF730;HLA-DMA;IRF9;BIRC3;PIK3CD;ZNF256;PILRB;ZNF114;ZNF705A;ZNF785;ZNF556;ZNF671;PILRA;ZFP57;ZNF773;ZNF418;ZNF334;TRAF5;ZNF440;ZNF443;ZNF433;ZNF888;FADD;ZNF441;…	Oligo
20	GO_Molecular_Function_2023__Voltage-Gated Potassium Channel Activity (GO:0005249)	-0.456534	-2.79468	0	0	0	49/70	28.24%	KCNF1;LRRC55;KCNV1;KCNQ2;KCNA6;KCNS1;KCNJ8;HCN3;KCNJ12;KCNS2;KCNJ11;KCNA1;KCNA4;KCNG2;KCNJ4;KCNH4;KCNK2;KCNA3;KCNC2;KCNJ6;HCN2;KCNQ4;KCNT1;KCNB2;KCNT2;KCNC1;KCNA2;KCNQ3;KCNA5;KCNJ3;KCNB1;KCND2;KCNE2;KCNJ16;KCNH3;KCNG3;KCNQ1;KCNJ13;KCNH6;KCNQ5;KCNH5;KCNC4;KCNJ5;LRRC38;KCNH7;KCNN2;KCNH2;KCNK1;KCNK6	Oligo
21	KEGG_2021_Human__Oxidative phosphorylation	-0.408481	-2.79186	0	0	0	69/115	30.69%	COX8C;COX7A1;ATP6V0C;COX4I2;ATP5MC1;NDUFC2;NDUFB11;NDUFA4;COX8A;COX6B2;COX6A1;TCIRG1;NDUFA11;ATP6V0B;ATP5MC3;NDUFB10;UQCR10;ATP5F1D;ATP6V1F;COX7A2;CYC1;NDUFB8;NDUFA13;ATP5PO;COX5B;NDUFB2;UQCR11;ATP5MF;COX4I1;COX7C;NDUFAB1;SDHD;COX6C;ATP5PF;NDUFB7;ATP6V0D2;ATP6V1G2;NDUFA4L2;NDUFA7;COX7B2;NDUFB3;NDUFS5;NDUFA2;NDUFB5;ATP5ME;NDUFS7;COX6B1;NDUFC2-KCTD14;UQCRQ;UQCRB;COX5A;UQCRH;UQCRFS1;NDUFS3;ATP5PD;ND…	Oligo
22	GO_Biological_Process_2023__Anterograde Trans-Synaptic Signaling (GO:0098916)	-0.3642	-2.78728	0	0	0	99/184	25.71%	CRH;SST;CORT;PNOC;PENK;SNCG;GABRD;DRD5;SYT5;CHRM4;SLC18A2;GAD2;SLC6A2;CACNB3;CPLX1;HTR5A;SNCB;KCNQ2;HTR1A;SLC12A5;PDYN;CHRNG;GAD1;CDK5;DOC2A;HTR1B;CHRNB2;NPY5R;GRM2;SYN1;KCNA1;CBLN1;PTCHD1;SLC1A6;HRH3;GRIN1;NPFF;CHRM1;GABRR1;HTR2A;CHRNA2;SYN2;CHRM2;UTS2;KCNK3;NRXN1;SLC12A7;HRH2;GABRP;GRIN2B;HTR7;NPTX1;GABRQ;HCRTR2;SYT1;GRIK1;SYT10;SNAP25;GLRA3;RIT2;HTR3C;CHRM3;HTR2B;GABBR2;GABRB2;HCRTR1;CACNB1;CH…	Oligo
23	KEGG_2021_Human__Retrograde endocannabinoid signaling	-0.391426	-2.77924	0	0	0	98/138	39.53%	GNG3;GABRD;MAPK12;SLC17A6;MAPK11;PTGS2;PLCB2;GNG13;NDUFC2;NDUFB11;NDUFA4;SLC32A1;CNR1;GNG10;NDUFA11;GABRG3;NDUFB10;PRKCG;GABRR1;GABRA1;SLC17A7;NDUFB8;GABRA4;CACNA1S;NDUFA13;ADCY7;NDUFB2;KCNJ6;GABRP;GABRQ;GNG2;CACNA1F;ADCY1;GABRA3;GABRG2;NDUFAB1;GNG4;NDUFB7;SLC17A8;PLCB4;GABRB2;NDUFA4L2;GABRG1;GRM5;GNG11;GNGT1;GABRA2;GABRA5;NDUFA7;KCNJ3;NDUFB3;NDUFS5;NDUFA2;NDUFB5;PLCB1;NDUFS7;GRIA1;NDUFC2-KCTD14;…	Oligo
24	GO_Cellular_Component_2023__Mitochondrial Respiratory Chain Complex IV (GO:0005751)	-0.740843	-2.76887	0	0	0	14/15	23.87%	COX4I2;NDUFA4;COX8A;COX6A1;COX7A2;COX5B;COX4I1;COX7C;COX6C;NDUFA4L2;COX6B1;COX5A;UQCRFS1;COX7B	Oligo
25	KEGG_2021_Human__Nicotine addiction	-0.524118	-2.7652	0	0	0	28/39	22.88%	GABRD;SLC17A6;SLC32A1;CHRNB2;GABRG3;GRIN1;GABRR1;GABRA1;SLC17A7;GABRA4;GABRP;GRIN2B;GABRQ;GABRA3;GRIN3B;GABRG2;SLC17A8;GABRB2;GABRG1;CHRNA4;GABRA2;GABRA5;GRIN3A;GRIN2C;GRIA1;GRIN2A;GABRR2;GABRB3	Oligo
26	GO_Molecular_Function_2023__Neuropeptide Activity (GO:0160041)	-0.69451	-2.76053	0	0	0	13/18	7.15%	CRH;CCK;CORT;PNOC;NPY;PENK;VIP;GRP;NPPA;UCN;GAL;NPFF;NMB	Oligo
27	GO_Molecular_Function_2023__Neuropeptide Hormone Activity (GO:0005184)	-0.69451	-2.76053	0	0	0	13/18	7.15%	CRH;CCK;CORT;PNOC;NPY;PENK;VIP;GRP;NPPA;UCN;GAL;NPFF;NMB	Oligo
28	GO_Biological_Process_2023__Proton Motive Force-Driven Mitochondrial ATP Synthesis (GO:0042776)	-0.486568	-2.73353	0	3.43484e-05	0.001	37/52	32.39%	NDUFC2;NDUFB11;NDUFA11;NDUFB10;ATP5F1D;NDUFB8;NDUFA13;ATP5PO;NDUFB2;ATP5MF;NDUFAB1;SDHD;ATP5PF;NDUFB7;NDUFA7;NDUFB3;NDUFS5;NDUFA2;NDUFB5;ATP5ME;NDUFS7;NDUFS3;ATP5PD;NDUFS8;NDUFA1;NDUFA3;NDUFA6;NDUFS6;NDUFB9;NDUFB1;NDUFA8;NDUFA12;ATP5F1B;NDUFB4;ATP5F1E;ATP5MG;NDUFC1	Oligo
29	GO_Biological_Process_2023__Proton Motive Force-Driven ATP Synthesis (GO:0015986)	-0.468637	-2.72847	0	6.62433e-05	0.002	49/59	43.06%	ATP5MC1;NDUFC2;NDUFB11;NDUFA11;ATP5MC3;NDUFB10;ATP5F1D;NDUFB8;NDUFA13;ATP5PO;NDUFB2;ATP5MF;NDUFAB1;ATP5MJ;SDHD;ATP5PF;NDUFB7;NDUFA7;NDUFB3;NDUFS5;NDUFA2;NDUFB5;ATP5ME;NDUFS7;NDUFS3;ATP5PD;NDUFS8;NDUFA1;NDUFA3;ATP5MK;NDUFA6;NDUFS6;NDUFB9;NDUFB1;NDUFA8;NDUFA12;ATP5F1B;NDUFB4;ATP5F1E;ATP5MG;NDUFC1;NDUFV1;ATP5MC2;NDUFS2;NDUFV2;ATP5PB;NDUFB6;NDUFA5;VPS9D1	Oligo
30	GO_Biological_Process_2023__Oxidative Phosphorylation (GO:0006119)	-0.464675	-2.69479	0	9.59385e-05	0.003	42/60	34.72%	NDUFC2;NDUFB11;NDUFA11;NDUFB10;ATP5F1D;NDUFB8;CHCHD10;NDUFA13;ATP5PO;NDUFB2;ATP5MF;NDUFAB1;SDHD;ATP5PF;NDUFB7;NDUFA7;NDUFB3;NDUFS5;NDUFA2;NDUFB5;ATP5ME;NDUFS7;UQCRB;UQCRH;NDUFS3;ATP5PD;NDUFS8;NDUFA1;NDUFA3;NDUFA6;NDUFS6;NDUFB9;NDUFB1;NDUFA8;NDUFA12;ATP5F1B;NDUFB4;ATP5F1E;ATP5MG;NDUFC1;UQCRC1;NDUFV1	Oligo
31	GO_Biological_Process_2023__Intermediate Filament Organization (GO:0045109)	-0.651532	-2.68633	0	9.27406e-05	0.003	13/20	8.95%	KRT17;KRT83;KRT5;KRT20;BFSP2;KRT15;DSP;KRT81;BBLN;KRT86;INA;NEFL;KRT10	Oligo
32	GO_Cellular_Component_2023__Dendrite Membrane (GO:0032590)	-0.569401	-2.6824	0	8.97489e-05	0.003	21/28	22.02%	THY1;SHISA8;GABRG3;LAMP5;GABRA1;ATP2B2;GABRA4;KCNC2;GABRA3;KCNC1;GABRG2;FOXM1;GABRG1;GABRA2;GABRA5;KCNB1;GRIA1;SHISA9;GPER1;DAGLA;KCNC4	Oligo
33	GO_Cellular_Component_2023__Ribosome (GO:0005840)	-0.458328	-2.66976	0	8.69443e-05	0.003	40/59	31.90%	RPL7A;RPS26;RPL36AL;RPL41;RPL18A;MRPS12;RPL27;RPL8;RPS18;RPS5;RPL10A;RPL18;RPL19;RPS28;RPS11;RPL24;RPL15;RPS4X;RPS7;RPS13;RPL13A;RPL9;RPS10;RPL11;RPS17;RPS23;BTF3;RPS21;RPL36;RPL30;RPL38;RPS9;RPS25;MRPS7;RPS27;RPS19;RPL32;RPS3;RPL6;RPL39	Oligo
34	GO_Biological_Process_2023__Response To Copper Ion (GO:0046688)	0.612952	2.65815	0	0.00768219	0.018	10/17	7.25%	MT1A;MT1X;AQP1;MT2A;MT1H;MT1M;MT3;MT1G;MT1E;MT1F	Oligo
35	GO_Biological_Process_2023__Regulation Of Sodium Ion Transmembrane Transporter Activity (GO:2000649)	-0.534615	-2.65407	0	8.43096e-05	0.003	23/34	26.99%	FXYD2;FXYD6;SCN3B;FXYD4;FXYD3;CAV3;YWHAH;NEDD4L;PTPN3;SCN4B;FXYD1;SCN2B;WNK2;FXYD7;RANGRF;NETO1;FGF13;FGF12;HECW1;SCN1B;GLRX;UTRN;FGF14	Oligo
36	GO_Biological_Process_2023__Macromolecule Biosynthetic Process (GO:0009059)	-0.347706	-2.65317	0	8.18299e-05	0.003	113/178	36.66%	ALAS2;RPS4Y1;EEF1A2;RPL7A;EEF1G;MRPL12;APOE;FAU;MRPS6;RPS26;RPL36AL;COL5A1;RPL41;MRPL55;B4GAT1;RPL18A;MRPL34;MRPS12;RPL29;EIF5A;MRPL28;RPS2;RPL27;MRPL51;RPL8;RPS18;RPS14;RPS5;DHPS;RPS15;RPL10A;RPL18;RPL19;RPLP1;MRPL23;RPL10;RPS28;RPS11;MRPS17;MRPL41;RPL24;RPL26;RPL7;RPS27A;MRPL36;RPL23A;RPL15;RPS4X;RPL3;RPS7;RPS13;RPS16;RPL13A;RPL9;RPS10;RPL11;RPS17;RPS23;GSPT2;RPS21;RPL13;RPS3A;RPL36;RPL28;RPSA;…	Oligo
37	GO_Biological_Process_2023__Neuropeptide Signaling Pathway (GO:0007218)	-0.466154	-2.64458	0	7.94919e-05	0.003	36/52	26.43%	PNOC;NPY;PENK;NXPH4;GRP;MCHR1;SSTR3;NXPH2;KISS1R;NXPH3;NPPA;MCHR2;PDYN;NMU;GAL;SSTR1;SORL1;GPR83;OPRD1;HCRTR2;GALR1;GPR149;CYSLTR2;SSTR2;HCRTR1;NTSR1;GLRB;SORCS2;OPRL1;NPSR1;CPE;GLRA2;GLRA1;OPRM1;SORCS1;SORCS3	Oligo
38	GO_Biological_Process_2023__Neurotransmitter Secretion (GO:0007269)	-0.491485	-2.62403	0	7.72838e-05	0.003	27/42	21.56%	CPLX1;RAB3A;SLC32A1;CDK5;DOC2A;SYN1;HRH3;DOC2B;UNC13A;SYN2;NRXN1;LIN7B;OTOF;STX1A;SYT1;PCLO;SYT10;SNAP25;RPH3A;CPLX2;CPLX4;GRM4;SNAPIN;RIMS2;SNPH;PPFIA3;NRXN2	Oligo
39	KEGG_2021_Human__Parkinson disease	-0.33123	-2.62086	0	7.51951e-05	0.003	124/223	34.72%	COX8C;COX7A1;SLC18A2;COX4I2;ATP5MC1;NDUFC2;DRD1;NDUFB11;SEPTIN5;NDUFA4;TUBB2A;UBB;COX8A;TUBA4A;SLC25A5;COX6B2;COX6A1;CALM3;NDUFA11;ATP5MC3;PSMB6;NDUFB10;UQCR10;ATP5F1D;COX7A2;CYC1;NDUFB8;TUBB2B;NDUFA13;TUBB4B;ATP5PO;COX5B;NDUFB2;TUBA3D;MAOA;SLC25A4;TUBA1B;UQCR11;UCHL1;COX4I1;COX7C;TUBB3;NDUFAB1;SDHD;COX6C;ATP5PF;NDUFB7;CAMK2B;DUSP1;TXN;NDUFA4L2;CALML4;NDUFA7;BAX;COX7B2;CAMK2A;LRRK2;MAOB;NDUFB3;ND…	Oligo
40	KEGG_2021_Human__Primary immunodeficiency	0.49675	2.61989	0	0.00749014	0.024	16/25	17.45%	CD4;AIRE;TNFRSF13B;ZAP70;JAK3;LCK;PTPRC;CD40;TAP1;CIITA;CD8A;BTK;ADA;RAG1;RFX5;TAP2	Oligo
41	KEGG_2021_Human__Cytokine-cytokine receptor interaction	0.291169	2.61178	0	0.00599211	0.024	75/175	16.02%	NGFR;IL1RL1;CCL2;LTA;IL26;TGFB3;IL2RA;TNFRSF12A;CCR4;AMH;EBI3;INHA;IL13;IFNG;BMP6;CD4;IL17RE;TNFRSF1A;INHBA;IL3RA;IL15RA;TNFRSF13B;IL34;IL17RC;INHBC;IL17RB;TGFBR2;IFNA6;CTF1;CCR3;IL10RA;TNFRSF11B;GDF15;TNFRSF19;BMP8A;CNTFR;IFNA2;IL15;IL12A;CD40;CSF2RA;IL10RB;PRLR;IL6R;IL1R2;CCL24;FAS;IL4R;IL2RB;MSTN;CSF1;LTBR;CSF1R;TNFSF18;BMPR1B;IL18R1;IL5RA;TNFRSF25;IL11RA;IL20RA;IL16;IL19;GHR;BMP2;IL13RA1;TGFB…	Oligo
42	WikiPathway_2023_Human__Complement System WP2806	0.350838	2.60399	0	0.00518548	0.025	38/78	17.10%	VSIG4;F11;TLR2;F13A1;CR2;SELPLG;CD93;CLEC4M;ADM;SFTPA2;ALB;CPN1;ICAM1;CR1;SELL;PTX3;CFI;LAMC1;CD40;CFHR2;ITGB3;THBS1;FCGR3A;LAMA5;C5AR2;APOA1;PROS1;C3;SELP;SELE;FCER2;LRP2;FPR1;PLAUR;ITGA2B;C2;WAS;CD55	Oligo
43	GO_Biological_Process_2023__Translation (GO:0006412)	-0.326767	-2.60096	0	7.32162e-05	0.003	166/229	49.01%	RPS4Y1;EEF1A2;MRPL54;GADD45GIP1;RPL7A;MRPS28;MRPL40;EEF1G;MRPL12;AURKAIP1;FAU;MRPS6;RPS26;RPL36AL;RPL41;MRPL55;RPL18A;MRPL17;MRPL34;NDUFA7;MRPS12;APEH;MRPS34;RPL29;EIF5A;MRPL28;RPS2;RPL27;MRPL51;RPL8;RPS18;RPS14;MRPL53;RPS5;DHPS;MRPS2;RPS15;RPL10A;RPL18;RPL19;RPLP1;MRPL23;RPL10;RPL22L1;MRPS26;RPS28;RPS11;MRPS17;MRPL41;RPL24;RPL26;CHCHD1;RPL7;RPS27A;UBA52;MRPL36;RPL23A;RPL15;RPS4X;RPL3;RPS7;RPS13;…	Oligo
44	GO_Biological_Process_2023__Regulation Of Catecholamine Secretion (GO:0050433)	-0.566216	-2.59399	0	7.13389e-05	0.003	17/26	19.83%	SYT6;SYT5;FFAR3;CHRNB2;SYT13;HRH3;SYT4;STX1A;SYT1;SYT10;KCNA2;FGF20;SYT7;CHRNA4;SYT17;KCNB1;SYT3	Oligo
45	GO_Biological_Process_2023__Inflammatory Response (GO:0006954)	0.292142	2.59113	0	0.00510317	0.027	62/165	13.64%	AGTR1;PROK2;PLA2G4B;IL1RL1;TMIGD3;CCL2;TLR2;HPR;ADORA3;CD44;IL2RA;CMKLR1;AOC3;TLR4;PTGIR;IL13;IFNG;ADM;NOX1;HP;TNFRSF1A;CHI3L1;TLR3;ITGB2;BDKRB2;SCUBE1;PIK3CG;CCR3;TLR10;GGT5;LGALS9;TLR6;IFNA2;CD40;SIGLEC1;LTB4R2;SPAM1;TBXA2R;THBS1;IL10RB;CD96;TLR1;CCL24;CARD18;CIITA;AGER;C5AR2;TAC4;CSF1R;LOXL3;SELE;ADCY8;LYZ;CYBA;ITGAL;PIK3CD;CYBB;NFKB2;LTB4R;TNFAIP6;SLC11A1;BMP2	Oligo
46	WikiPathway_2023_Human__Mitochondrial Complex IV Assembly WP4922	-0.532246	-2.57439	0	0.000139111	0.005	22/31	28.44%	NDUFA4;COX8A;COA3;COX6A1;PET100;COX7A2;COX14;COX5B;PET117;COX4I1;COX7C;COX6C;COX6B1;TACO1;COX5A;COX7B;COA6;COX16;PNKD;TMEM177;SURF1;HIGD1A	Oligo
47	GO_Molecular_Function_2023__Hormone Activity (GO:0005179)	-0.477348	-2.57145	0	0.000135718	0.005	21/43	7.53%	CRH;SST;CCK;CORT;PNOC;VGF;NPY;PENK;VIP;POMC;GRP;CHGB;EDN3;PTHLH;NPPA;IGF1;UCN;GAL;NPFF;NMB;INHBB	Oligo
48	GO_Cellular_Component_2023__Respiratory Chain Complex I (GO:0045271)	-0.484955	-2.56276	0	0.000129405	0.005	35/41	42.92%	NDUFC2;NDUFB11;NDUFA4;NDUFA11;NDUFB10;NDUFB8;NDUFA13;NDUFB2;NDUFAB1;NDUFB7;NDUFA7;NDUFB3;NDUFS5;NDUFA2;NDUFB5;NDUFS7;NDUFC2-KCTD14;NDUFS3;NDUFS8;NDUFA1;NDUFA3;NDUFA6;NDUFS6;NDUFB9;NDUFB1;NDUFA8;NDUFA12;NDUFB4;NDUFC1;NDUFV1;NDUFS2;NDUFV2;NDUFAF1;NDUFB6;NDUFA5	Oligo
49	GO_Cellular_Component_2023__Mitochondrial Respiratory Chain Complex I (GO:0005747)	-0.484955	-2.56276	0	0.000129405	0.005	35/41	42.92%	NDUFC2;NDUFB11;NDUFA4;NDUFA11;NDUFB10;NDUFB8;NDUFA13;NDUFB2;NDUFAB1;NDUFB7;NDUFA7;NDUFB3;NDUFS5;NDUFA2;NDUFB5;NDUFS7;NDUFC2-KCTD14;NDUFS3;NDUFS8;NDUFA1;NDUFA3;NDUFA6;NDUFS6;NDUFB9;NDUFB1;NDUFA8;NDUFA12;NDUFB4;NDUFC1;NDUFV1;NDUFS2;NDUFV2;NDUFAF1;NDUFB6;NDUFA5	Oligo
50	GO_Biological_Process_2023__Regulation Of Tumor Necrosis Factor Production (GO:0032680)	0.315947	2.53364	0	0.00792226	0.047	47/104	20.14%	ZFP36;TLR2;LILRA2;AMH;TLR4;HSPB1;ZC3H12A;IFNG;SPN;LTF;CLEC4A;OAS3;ELF4;TLR3;GHRL;PLCG2;LILRB1;CD33;LGALS9;PTPRC;CLEC7A;TNFAIP3;LY96;THBS1;FCGR3A;BPI;IRAK3;VSIR;TLR1;RARA;AGER;HLA-E;C5AR2;CYBA;NLRC3;MC1R;CD84;GAS6;PTPN22;FADD;EHHADH;IFIH1;PTPRJ;CLU;FRMD8;TIRAP;RIGI	Oligo
51	KEGG_2021_Human__Malaria	0.427897	2.51516	0	0.00781023	0.053	21/40	11.68%	MYD88;CCL2;TLR2;TGFB3;TLR4;THBS4;IFNG;ICAM1;ITGB2;HGF;GYPB;CR1;LRP1;IL12A;CD40;CR1L;THBS1;HBA1;SELP;SELE;ITGAL	Oligo
52	GO_Biological_Process_2023__Potassium Ion Transport (GO:0006813)	-0.359742	-2.50396	0	0.000274006	0.011	63/112	26.27%	KCNF1;LRRC55;KCNV1;KCNQ2;KCNA6;KCNS1;KCNJ8;HCN3;KCNJ12;KCNS2;KCNJ11;ABCC8;KCNA1;KCNA4;KCNG2;KCNJ4;KCNK16;KCND1;SLC17A7;KCNH4;KCNMB2;KCNK2;KCNK3;KCNA3;SLC12A7;KCNC2;SLC9A7;KCNJ6;HCN2;KCNK7;KCNQ4;KCNB2;KCNC1;KCNA2;SLC9A2;KCNQ3;KCNA5;HCN1;KCNJ3;PKD2L1;KCNB1;ABCC9;KCND2;KCNE2;KCNJ16;KCNH3;KCNG3;KCNQ1;KCNK9;KCNJ13;KCNH6;KCNQ5;KCNH5;SLC24A3;KCNC4;KCNJ5;KCNMB1;LRRC38;KCNAB3;CCDC51;KCNH7;KCNN2;KCNH2	Oligo
53	KEGG_2021_Human__Amphetamine addiction	-0.419458	-2.50125	0	0.000267917	0.011	39/61	35.17%	SLC18A2;DRD1;PDYN;DDC;CALM3;PRKCG;GRIN1;ARC;FOSB;CREB3L3;FOS;CREB3L1;GRIN2B;MAOA;CAMK4;STX1A;GRIN3B;PPP1R1B;CAMK2B;CALML4;CAMK2A;MAOB;GRIN3A;GRIN2C;GRIA1;GRIN2A;CREB3;ATF4;PPP3R1;GRIN2D;GRIA3;CACNA1D;CREB3L4;CACNA1C;PRKCA;CALM2;CALM1;ATF6B;GRIA4	Oligo
54	GO_Biological_Process_2023__Regulation Of Sodium Ion Transmembrane Transport (GO:1902305)	-0.552633	-2.49715	0	0.000262093	0.011	18/26	24.02%	FXYD2;FXYD6;SCN3B;FXYD4;FXYD3;CAV3;YWHAH;NEDD4L;PTPN3;SCN4B;FXYD1;SCN2B;FXYD7;RANGRF;FGF12;SCN1B;SCN5A;UTRN	Oligo
55	GO_Biological_Process_2023__Cellular Response To Hormone Stimulus (GO:0032870)	-0.382984	-2.49334	0	0.000256516	0.011	43/81	25.11%	OCSTAMP;CACNA1H;AKR1C1;UCP1;CAV1;HSPA1B;ATP1A3;HSPA1A;RAMP2;HSPA8;GPR150;MGARP;GNRHR;MEF2C;ADTRP;GATA1;GPR22;NR4A3;THRB;RAMP3;AKR1C3;GAS2L1;HCRTR2;QRFPR;FFAR4;SOCS2;CTSH;HCRTR1;SLC5A5;ROBO2;NPFFR2;SRC;LMO2;GPER1;SLIT1;CRHBP;SFRP1;GCK;AKR1C2;OXTR;RAMP1;CTSS;NSMF	Oligo
56	GO_Biological_Process_2023__Cellular Response To Organic Substance (GO:0071310)	-0.409711	-2.47932	0	0.000289814	0.013	39/64	28.92%	CACNA1H;UCP1;STING1;CYP1B1;IL1B;RAMP2;TREM2;HCLS1;GPR150;GNRHR;CXCR4;GPR22;IGFBP5;RAMP3;HCRTR2;QRFPR;FFAR4;SOCS2;HCRTR1;CCR7;CCL5;ASAH2;ROBO2;NPFFR2;NLRP12;SYK;DPYSL3;LEF1;SLC1A1;SLIT1;OXTR;PID1;RAMP1;HAX1;TGFB1;NR1H4;IL18;FLT3;PARK7	Oligo
57	GO_Molecular_Function_2023__Potassium Channel Activity (GO:0005267)	-0.407594	-2.47445	0	0.0002839	0.013	46/70	28.24%	KCNF1;LRRC55;KCNV1;KCNQ2;KCNA6;HCN3;KCNS2;KCNJ11;KCNA1;KCNA4;KCNG2;KCNK16;KCNH4;KCNMB2;KCNK2;KCNK3;KCNC2;HCN2;KCNK7;KCNQ4;KCNT1;GRIK1;KCNT2;KCNC1;KCNA2;KCNQ3;TMEM38A;HCN1;PKD2L1;ABCC9;KCND2;KCNH3;GRIK5;KCNQ1;KCNK9;KCNQ5;KCNH5;KCNC4;KCNMB1;LRRC38;CCDC51;KCNN2;KCNU1;KCNH2;KCNK1;KCNK6	Oligo
58	GO_Biological_Process_2023__Energy Derivation By Oxidation Of Organic Compounds (GO:0015980)	-0.477005	-2.47052	0	0.00029677	0.014	28/40	30.78%	COX4I2;NDUFA4;COX8A;COX6A1;UQCR10;COX7A2;CYC1;NR4A3;COX5B;MTLN;MRAP2;UQCR11;COX4I1;COX7C;COX6C;COX6B1;UQCRQ;UQCRB;ADGRF5;COX5A;UQCRH;PID1;COX7B;PPARGC1A;CYCS;CHCHD5;LEPR;SLC25A13	Oligo
59	KEGG_2021_Human__Serotonergic synapse	-0.364756	-2.46782	0	0.000309135	0.015	50/100	23.03%	GNG3;SLC18A2;ALOX12;HTR5A;PTGS2;CYP2C8;PLCB2;GNG13;CYP4X1;HTR1A;DDC;GNG10;HTR1B;PRKCG;HTR2A;CACNA1S;KCNJ6;MAOA;HTR7;GNG2;CACNA1F;HTR3C;HTR2B;GNG4;DUSP1;PLCB4;GABRB2;GNG11;CYP2D6;GNGT1;TPH2;ALOX5;PTGS1;HTR1F;KCNJ3;MAOB;KCND2;PLCB1;HTR1D;GNB2;SLC6A4;HTR4;JMJD7-PLA2G4B;PLA2G4A;ALOX12B;HTR3E;PLA2G4E;KCNJ5;GABRB3;HRAS	Oligo
60	MSigDB_Hallmark_2020__Oxidative Phosphorylation	-0.317592	-2.46542	0	0.000321025	0.016	138/199	48.71%	ATP6V0C;ATP5MC1;NDUFC2;NDUFA4;COX8A;SLC25A5;HSD17B10;COX6A1;TCIRG1;ATP6V0B;ATP5MC3;UQCR10;ATP5F1D;BCKDHA;ATP6V1F;COX7A2;CYC1;NDUFB8;TIMM10;ATP5PO;COX5B;NDUFB2;TOMM22;SLC25A4;GPX4;UQCR11;ATP5MF;COX4I1;COX7C;TIMM13;NDUFAB1;SDHD;COX6C;ATP5PF;NDUFB7;MRPL34;NDUFA7;MRPS12;LDHB;BAX;MAOB;SLC25A11;NDUFB3;NDUFA2;NDUFB5;ATP5ME;NDUFS7;COX6B1;UQCRQ;UQCRB;IDH3B;COX5A;ECH1;UQCRH;UQCRFS1;NDUFS3;ATP5PD;PHB2;HTRA2…	Oligo
61	GO_Molecular_Function_2023__Olfactory Receptor Activity (GO:0004984)	0.402885	2.45671	0	0.0120995	0.09	21/39	14.21%	OR7C1;OR7A5;OR6J1;OR7D4;OR52A1;OR10H1;OR2M3;OR7D2;OR2K2;OR1A1;OR1L8;OR2M2;OR2L2;OR2B8P;OR1I1;OR2M4;OR2AK2;OR2F1;OR7A17;OR51M1;OR1B1	Oligo
62	KEGG_2021_Human__Diabetic cardiomyopathy	-0.326708	-2.45162	0	0.000367463	0.019	121/178	43.56%	COX8C;MMP2;MAPK12;COX7A1;TNNI3;MAPK11;COX4I2;ATP5MC1;PLCB2;NDUFC2;NDUFB11;NDUFA4;COX8A;SLC25A5;COL3A1;COX6B2;COL1A2;COX6A1;ACE;NDUFA11;ATP5MC3;NDUFB10;UQCR10;PRKCG;ATP5F1D;COX7A2;CYC1;NDUFB8;NDUFA13;ATP5PO;COX5B;NDUFB2;SLC25A4;PLN;UQCR11;COX4I1;COX7C;NDUFAB1;SDHD;COX6C;ATP5PF;NDUFB7;CAMK2B;PLCB4;RAC2;NDUFA4L2;ATP2A3;TBC1D4;NDUFA7;COX7B2;PIK3R3;CAMK2A;NDUFB3;NDUFS5;NDUFA2;GAPDH;NDUFB5;PLCB1;NDUFS7…	Oligo
63	GO_Biological_Process_2023__Signal Release From Synapse (GO:0099643)	-0.47953	-2.44769	0	0.000360658	0.019	31/37	39.23%	CPLX1;RAB3A;SLC32A1;CDK5;SYN1;HRH3;UNC13A;SYN2;NRXN1;LIN7B;OTOF;STX1A;SYT1;PCLO;SYT10;SNAP25;CPLX2;CPLX4;GRM4;SNAPIN;SNPH;PPFIA3;NRXN2;RIMS1;VAMP2;PTPRN2;PDZD11;STXBP1;DVL1;DNAJC5;PIP5K1C	Oligo
64	GO_Biological_Process_2023__Regulation Of Postsynaptic Membrane Potential (GO:0060078)	-0.494243	-2.44622	0	0.000370962	0.02	23/34	23.96%	NPAS4;GABRG3;GRIN1;NPFF;GABRA1;MEF2C;GABRA4;INSYN2A;GRIN2B;GABRA3;GABRG2;FOXM1;GRID2;INSYN1;GABRG1;CHRNA4;GABRA2;GABRA5;LRRK2;GRIN2C;GRIN2A;GLRA1;MAPK8IP2	Oligo
65	GO_Molecular_Function_2023__Transforming Growth Factor Beta Binding (GO:0050431)	0.53101	2.44399	0	0.0123613	0.102	11/19	10.76%	TGFB3;LTBP2;LTBP1;TGFBR2;LRRC32;LTBP4;WFIKKN1;TGFBR3;THBS1;TSKU;CD109	Oligo
66	KEGG_2021_Human__Cardiac muscle contraction	-0.38509	-2.44288	0	0.000380899	0.021	40/76	21.64%	COX8C;COX7A1;FXYD2;TNNI3;COX4I2;CACNB3;ATP1A3;TNNT2;MYH6;COX8A;TPM2;COX6B2;COX6A1;UQCR10;COX7A2;ACTC1;CYC1;CACNA1S;CACNG8;COX5B;SLC9A7;CACNA1F;UQCR11;CACNG2;SLC8A3;COX4I1;COX7C;CACNG3;COX6C;CACNB1;ATP2A3;CACNA2D2;SLC8A1;COX7B2;COX6B1;UQCRQ;UQCRB;COX5A;UQCRH;UQCRFS1	Oligo
67	WikiPathway_2023_Human__Inflammatory Response Pathway WP453	0.473344	2.44079	0	0.0120995	0.109	14/24	12.50%	IL2RA;IFNG;LAMC2;TNFRSF1A;ZAP70;LCK;LAMC1;CD40;THBS1;IL4R;IL2RB;LAMA5;IL5RA;LAMB2	Oligo
68	GO_Biological_Process_2023__Mitochondrial Electron Transport, NADH To Ubiquinone (GO:0006120)	-0.49257	-2.44077	0	0.000374216	0.021	29/34	42.92%	NDUFC2;NDUFA4;NDUFB10;NDUFB8;NDUFB2;NDUFAB1;NDUFB7;NDUFA7;NDUFB3;NDUFS5;NDUFA2;NDUFB5;NDUFS7;NDUFS3;NDUFS8;NDUFA3;NDUFA6;NDUFS6;NDUFB9;NDUFB1;NDUFA8;NDUFB4;NDUFC1;NDUFV1;NDUFS2;NDUFV2;NDUFAF1;NDUFB6;NDUFA5	Oligo
69	KEGG_2021_Human__Coronavirus disease	-0.316482	-2.43223	0	0.000431723	0.024	115/195	33.70%	MAPK12;MAPK11;STING1;C6;IL1B;MASP1;ISG15;ACE;RPS4Y1;NLRP3;PRKCG;FOS;MAS1;F2;ACE2;C1QC;C9;C1QA;RPL7A;MASP2;C3AR1;FCGR2A;FAU;RPS26;RPL36AL;RPL41;IFNA13;RPL18A;C7;CFD;RPL29;PIK3R3;RPS2;RPL27;RPL8;RPS18;RPS14;SYK;C8G;OAS2;RPS5;RPS15;RPL10A;RPL18;RPL19;RPLP1;RPL10;MAPK13;RPL22L1;IKBKE;RPS28;MX2;CFB;RPS11;RPL24;RPL26;RPL7;RPS27A;UBA52;NRP1;RPL23A;TMPRSS2;RPL15;RPS4X;RPL3;C1R;RPS7;RPS13;RPS16;OAS1;RPL13…	Oligo
70	KEGG_2021_Human__Hematopoietic cell lineage	0.347805	2.42816	0	0.0123211	0.12	31/64	15.47%	HLA-DOB;CR2;CD44;IL2RA;ANPEP;FCGR1A;ITGA5;HLA-DQA1;CD4;GP1BA;IL3RA;ITGAM;CR1;CD33;CR1L;CSF2RA;ITGB3;IL6R;IL1R2;IL4R;CD8A;CSF1;CSF1R;IL5RA;HLA-DMA;FCER2;IL11RA;CD38;MME;ITGA2B;IL1R1	Oligo
71	GO_Biological_Process_2023__Regulation Of Regulated Secretory Pathway (GO:1903305)	-0.480534	-2.42706	0	0.000455844	0.026	26/34	36.45%	SYT6;SYT5;SEPTIN5;RAB3A;SYN1;SYT13;DOC2B;SYT4;SYT1;RAB15;SYT10;RPH3A;SYT7;SYT17;LRRK2;SNAPIN;RIMS4;SYT3;RIMS2;RIMS3;SYT2;RIMS1;RAB3D;SYT15;VPS18;RAB27A	Oligo
72	GO_Biological_Process_2023__Synaptic Vesicle Exocytosis (GO:0016079)	-0.465956	-2.42068	0	0.000463703	0.027	26/39	28.19%	SYT5;CPLX1;RAB3A;CDK5;DOC2B;UNC13A;SYT4;OTOF;STX1A;SYT1;PCLO;SYT10;SNAP25;CPLX2;SYT7;CPLX4;SNAPIN;RIMS4;RIMS2;SNPH;RIMS3;UNC13C;SYT2;RIMS1;VAMP2;STX1B	Oligo
73	GO_Biological_Process_2023__G Protein-Coupled Receptor Signaling Pathway, Coupled To Cyclic Nucleotide Second Messenger (GO:0007187)	-0.463586	-2.41475	0	0.000501711	0.03	27/41	21.23%	NPY;CHRM4;HTR5A;DRD1;HTR1A;PTH1R;CNR1;HTR1B;MTNR1A;HRH3;CHRM1;HTR2A;TSHR;CHRM2;VIPR1;OPRD1;HRH2;HTR7;CHRM3;HTR2B;ANXA1;NPY1R;HTR1F;HTR1D;CALCRL;XCR1;HTR4	Oligo
74	WikiPathway_2023_Human__GABA Receptor Signaling WP4159	-0.501226	-2.41355	0	0.000493619	0.03	18/31	16.89%	GABRD;GAD2;SLC32A1;GAD1;GABRG3;GABRA1;GABRA4;GABRP;GABRQ;GABRA3;GABRG2;GABBR2;GABRB2;AP2S1;GABRG1;GABRA2;GABRA5;SLC6A11	Oligo
75	GO_Molecular_Function_2023__NADH Dehydrogenase (Ubiquinone) Activity (GO:0008137)	-0.490103	-2.40914	0	0.000529946	0.033	28/33	42.92%	NDUFC2;NDUFA4;NDUFB10;NDUFB8;NDUFB2;NDUFB7;NDUFA7;NDUFB3;NDUFS5;NDUFA2;NDUFB5;NDUFS7;NDUFS3;NDUFS8;NDUFA3;NDUFA6;NDUFS6;NDUFB9;NDUFB1;NDUFA8;NDUFA12;NDUFB4;NDUFC1;NDUFV1;NDUFS2;NDUFV2;NDUFB6;NDUFA5	Oligo
76	GO_Molecular_Function_2023__Quaternary Ammonium Group Transmembrane Transporter Activity (GO:0015651)	0.565614	2.40473	0	0.013828	0.141	10/15	16.68%	SLC22A3;SLC22A16;SLC22A1;SLC6A20;SLC22A5;SLC22A2;SLC44A5;SLC25A20;SLC44A2;SLC22A4	Oligo
77	KEGG_2021_Human__Huntington disease	-0.289855	-2.39667	0	0.000652082	0.042	141/283	33.94%	COX8C;COX7A1;UCP1;COX4I2;GPX3;ATP5MC1;PLCB2;NDUFC2;NDUFB11;NDUFA4;TUBB2A;COX8A;TUBA4A;SLC25A5;BDNF;COX6B2;COX6A1;NDUFA11;ATP5MC3;POLR2L;PSMB6;NDUFB10;BBC3;UQCR10;ATP5F1D;GRIN1;COX7A2;CYC1;NDUFB8;CREB3L3;TUBB2B;NDUFA13;DNAH5;TUBB4B;CREB3L1;ATP5PO;COX5B;POLR2J2;NDUFB2;TUBA3D;GRIN2B;SLC25A4;DCTN3;TUBA1B;STX1A;UQCR11;COX4I1;COX7C;TUBB3;HAP1;TBPL2;POLR2I;NDUFAB1;SDHD;COX6C;ATP5PF;NDUFB7;PLCB4;POLR2K;N…	Oligo
78	GO_Molecular_Function_2023__GABA Receptor Activity (GO:0016917)	-0.572874	-2.39521	0	0.000670586	0.044	16/20	22.88%	GABRD;GABRG3;GABRR1;GABRA1;GABRA4;GABRP;GABRQ;GABRA3;GABRG2;GABBR2;GABRB2;GABRG1;GABRA2;GABRA5;GABRR2;GABRB3	Oligo
79	GO_Biological_Process_2023__Negative Regulation Of Tumor Necrosis Factor Superfamily Cytokine Production (GO:1903556)	0.388897	2.38867	0	0.0148266	0.16	19/40	15.39%	TLR4;ZC3H12A;LTF;CLEC4A;ELF4;GHRL;LILRB1;CD33;LGALS9;TNFAIP3;BPI;IRAK3;VSIR;RARA;C5AR2;NLRC3;MC1R;GAS6;PTPN22	Oligo
80	WikiPathway_2023_Human__Mitochondrial Complex I Assembly Model OXPHOS System WP4324	-0.425759	-2.38256	0	0.000772838	0.051	37/50	42.92%	NDUFC2;NDUFB11;NDUFB10;NDUFB8;NDUFAF3;NDUFA13;NDUFB2;NDUFAB1;NDUFB7;NDUFA7;NDUFB3;NDUFS5;NDUFA2;NDUFB5;NDUFS3;NDUFA1;DMAC1;NDUFA3;TMEM70;NDUFA6;NDUFS6;NDUFB9;NDUFB1;NDUFA8;NDUFA12;NDUFB4;NDUFC1;NDUFV1;TMEM186;ECSIT;DMAC2;NDUFS2;NDUFV2;NDUFAF4;NDUFAF1;NDUFB6;NDUFA5	Oligo
81	GO_Biological_Process_2023__Potassium Ion Transmembrane Transport (GO:0071805)	-0.337212	-2.3758	0	0.000816671	0.054	67/121	28.24%	KCNF1;FXYD2;LRRC55;KCNV1;ATP1A3;KCNQ2;KCNA6;KCNS1;KCNJ8;SLC12A5;HCN3;KCNJ12;KCNS2;KCNJ11;ABCC8;KCNA1;KCNA4;KCNG2;KCNJ4;KCNK16;KCND1;KCNH4;KCNK2;KCNK3;KCNA3;SLC12A7;KCNC2;SLC9A7;KCNJ6;HCN2;KCNK7;KCNQ4;KCNB2;KCNT2;KCNC1;KCNA2;SLC9A2;KCNQ3;KCNA5;SLC12A1;HCN1;KCNJ3;PKD2L1;KCNB1;ABCC9;KCND2;KCNE2;KCNJ16;KCNH3;KCNG3;KCNQ1;KCNK9;KCNJ13;KCNH6;KCNQ5;KCNH5;SLC24A3;KCNC4;KCNJ5;LRRC38;CCDC51;KCNH7;KCNN2;KCNH…	Oligo
82	WikiPathway_2023_Human__Familial Hyperlipidemia Type 4 WP5111	0.519813	2.37338	0	0.0156285	0.178	11/18	15.73%	CETP;LPL;GPIHBP1;LRP1;GCKR;LCAT;FAS;PLTP;APOA1;LIPC;MTTP	Oligo
83	GO_Biological_Process_2023__Regulation Of Calcium Ion-Dependent Exocytosis (GO:0017158)	-0.511116	-2.37275	0	0.000859214	0.057	16/27	19.83%	SYT6;SYT5;DOC2A;CBARP;SYT13;DOC2B;SYT4;BAIAP3;STX1A;SYT1;SYT10;RPH3A;SYT7;SYT17;KCNB1;SYT3	Oligo
84	GO_Biological_Process_2023__Aerobic Respiration (GO:0009060)	-0.40655	-2.35862	0	0.00110213	0.074	37/58	34.72%	NDUFC2;NDUFB11;NDUFA11;NDUFB10;ATP5F1D;NDUFB8;CHCHD10;NDUFA13;NDUFB2;BLOC1S1;NDUFAB1;NDUFB7;NDUFA7;NDUFB3;NDUFS5;NDUFA2;NDUFB5;NDUFS7;UQCRB;UQCRH;NDUFS3;NDUFS8;MDH2;NDUFA1;ME3;NDUFA3;NDUFA6;NDUFS6;SURF1;NDUFB9;NDUFB1;NDUFA8;NDUFA12;NDUFB4;NDUFC1;UQCRC1;NDUFV1	Oligo
85	GO_Molecular_Function_2023__Voltage-Gated Monoatomic Cation Channel Activity (GO:0022843)	-0.382333	-2.35828	0	0.00108639	0.074	47/70	32.33%	KCNF1;LRRC55;KCNV1;CACNB3;KCNQ2;KCNA6;HCN3;KCNS2;KCNJ11;KCNA1;KCNA4;KCNG2;KCNH4;CACNA1S;CACNG8;KCNC2;HCN2;CACNA1F;KCNQ4;KCNC1;CACNG2;KCNA2;CACNG3;CACNB1;CACNA2D2;KCNQ3;HCN1;KCND2;CACNA1I;KCNH3;KCNQ1;NCS1;KCNQ5;KCNH5;KCNC4;LRRC38;OPRM1;KCNH2;KCNK1;CACNB4;TMC1;ITGAV;CACNA1D;CACNA1A;CACNB2;CACNA1C;HVCN1	Oligo
86	GO_Biological_Process_2023__Negative Regulation Of Tumor Necrosis Factor Production (GO:0032720)	0.39084	2.35094	0	0.0174883	0.208	18/38	15.39%	TLR4;ZC3H12A;CLEC4A;ELF4;GHRL;LILRB1;CD33;LGALS9;TNFAIP3;BPI;IRAK3;VSIR;RARA;C5AR2;NLRC3;MC1R;GAS6;PTPN22	Oligo
87	GO_Molecular_Function_2023__Receptor Ligand Activity (GO:0048018)	-0.299241	-2.34461	0	0.00134539	0.09	105/206	26.63%	CRH;SST;CCK;WNT7A;VGF;VIP;SEMA3G;NBL1;POMC;WNT10B;CHGB;CD70;S100A4;PDGFB;WNT16;HSPA1A;VEGFC;EDN3;WNT5A;PTHLH;CD86;BMP3;BMP5;GDF10;NPPA;IL1B;BTC;IGF1;VEGFA;BDNF;SEMA5A;SFRP2;WNT2;WNT4;DKK1;CNTF;NMB;DAND5;FGF10;INHBB;F2;ALKAL2;WNT9A;TNFSF11;NGF;ALKAL1;CX3CL1;FGF18;FGF5;LEFTY1;FAM3B;DPP4;FGF9;KITLG;GRN;BMP4;NPPC;GDF7;CRLF1;FGF7;FGF17;FGF20;EREG;WNT9B;NRTN;CXCL13;ERFE;KNG1;NODAL;CCL5;CCL26;GPNMB;IL33…	Oligo
88	KEGG_2021_Human__Non-alcoholic fatty liver disease	-0.323547	-2.33212	0	0.00145551	0.098	72/141	30.94%	COX8C;MAPK12;COX7A1;MAPK11;COX4I2;NDUFC2;CEBPA;NDUFB11;NDUFA4;IL1B;COX8A;COX6B2;COX6A1;BID;NDUFA11;NDUFB10;UQCR10;COX7A2;CYC1;NDUFB8;FOS;NDUFA13;COX5B;NDUFB2;UQCR11;COX4I1;COX7C;PKLR;NDUFAB1;SDHD;COX6C;NDUFB7;NDUFA4L2;NDUFA7;BAX;COX7B2;PIK3R3;NDUFB3;NDUFS5;NDUFA2;NDUFB5;NDUFS7;COX6B1;NDUFC2-KCTD14;UQCRQ;UQCRB;MAPK13;COX5A;UQCRH;UQCRFS1;NDUFS3;NDUFS8;IRS1;NDUFA1;COX7B;ATF4;PIK3R2;NDUFA3;TGFB1;CASP…	Oligo
89	GO_Cellular_Component_2023__Potassium Channel Complex (GO:0034705)	-0.371388	-2.32775	0	0.00149909	0.102	44/75	24.57%	KCNF1;LRRC55;KCNV1;KCNQ2;KCNA6;KCNS1;KCNJ8;KCNS2;KCNJ11;ABCC8;KCNA1;KCNA4;KCNG2;KCNJ4;KCND1;KCNH4;KCNMB2;KCNA3;KCNC2;KCNJ6;HCN2;KCNQ4;KCNB2;GRIK1;KCNC1;KCNA2;KCNQ3;KCNA5;KCNJ3;KCNB1;ABCC9;KCND2;KCNE2;KCNJ16;GRIK5;KCNG3;KCNQ1;KCNQ5;KCNC4;KCNJ5;KCNMB1;LRRC38;KCNAB3;CCDC51	Oligo
90	GO_Cellular_Component_2023__Polysomal Ribosome (GO:0042788)	-0.492685	-2.32309	0	0.0015415	0.106	20/28	31.90%	RPL7A;RPS26;RPL36AL;RPL41;RPL18A;RPL8;RPL10A;RPL18;RPL19;RPS28;RPL24;RPL11;RPS23;RPS21;RPL36;RPL30;RPL38;RPL32;RPL6;RPL39	Oligo
91	GO_Biological_Process_2023__Monoatomic Cation Transmembrane Transport (GO:0098655)	-0.284537	-2.32268	0	0.00154568	0.108	135/255	32.44%	SLC30A3;KCNF1;FXYD2;LRRC55;ATP6V0C;UCP1;TRPM1;KCNV1;SLC39A4;SLC6A2;TRPC5;SLC36A2;ATP1A3;KCNQ2;KCNA6;KCNS1;KCNJ8;HCN3;SCN3B;SLC36A3;KCNS2;TCIRG1;KCNJ11;ABCC8;ATP6V0B;KCNA1;KCNA4;KCNG2;SLC40A1;SLC30A8;SLC24A5;GRIN1;ATP6V1F;KCNK16;KCND1;KCNH4;SLC30A2;SLC6A17;KCNK2;KCNK3;KCNA3;SCN2A;CACNA1S;SLC12A7;CACNA1G;ATP5PO;KCNC2;SLC9A7;HCN2;SLC29A4;GRIN2B;KCNK7;ASIC4;KCNQ4;KCNB2;KCNC1;ATP5MF;SLC8A3;SCN4B;TRPV2…	Oligo
92	WikiPathway_2023_Human__GPCRs Class A Rhodopsin Like WP455	-0.312068	-2.31764	0	0.00168397	0.119	81/159	22.00%	GPR3;DRD5;CHRM4;MCHR1;OR3A3;GPR6;SSTR3;HTR5A;DRD1;HTR1A;FFAR3;CNR1;HTR1B;NPY5R;PTGER4;SSTR1;ACKR3;MTNR1A;HRH3;F2R;CHRM1;CXCR4;HTR2A;ADRA1B;GPR85;CHRM2;GPR83;RGL4;GPR22;MAS1;GPR18;CX3CR1;OR3A2;OPRD1;ADRA2A;MC4R;HRH2;CCKBR;FSHR;C3AR1;GPR34;HTR7;GPR68;HCRTR2;CXCR2;GPR27;P2RY14;GALR1;ADRA1D;ADRA1A;CHRM3;ADRB2;CYSLTR2;OR1F1;HTR2B;SSTR2;P2RY13;HCRTR1;CCR7;NPY1R;NTSR1;GPR65;GPR12;HTR1F;OPN4;NPFFR2;GPR75…	Oligo
93	MSigDB_Hallmark_2020__IL-6/JAK/STAT3 Signaling	0.328926	2.31287	0	0.0215101	0.262	31/69	18.28%	MYD88;TLR2;MAP3K8;CD44;IL2RA;TNFRSF12A;PDGFC;EBI3;TNFRSF1A;IL3RA;IL15RA;IL17RB;CNTFR;CSF2RA;ITGB3;SOCS3;IL10RB;IL1R2;FAS;IL4R;CSF1;LTBR;IL18R1;IRF9;CD38;IL13RA1;IL1R1;STAT2;BAK1;TYK2;JUN	Oligo
94	GO_Biological_Process_2023__Positive Regulation Of Cartilage Development (GO:0061036)	0.546056	2.31054	0	0.0209239	0.27	12/15	25.25%	ZBTB16;MDK;SOX9;BMPR1B;SOX5;PKDCC;BMP2;GDF5;LOXL2;SOX6;BMP1;BMPR2	Oligo
95	GO_Molecular_Function_2023__Transmitter-Gated Monoatomic Ion Channel Activity (GO:0022824)	-0.45676	-2.30901	0.0014881	0.00180663	0.13	26/37	27.65%	GABRG3;GABRA1;GABRA4;GRIN2B;GABRA3;GRIN3B;GRIK1;GABRG2;GLRA3;HTR3C;GRID2;GABRB2;GABRG1;GABRA2;GABRA5;GRIN3A;GRIN2C;GRIA1;GRIK5;GRIN2A;GLRA2;HTR3E;GABRB3;CHRNB1;GRIN2D;GRIA3	Oligo
96	WikiPathway_2023_Human__Monoamine GPCRs WP58	-0.486561	-2.30235	0	0.00193804	0.14	22/31	22.00%	DRD5;CHRM4;HTR5A;DRD1;HTR1A;HTR1B;CHRM1;HTR2A;ADRA1B;CHRM2;ADRA2A;HRH2;HTR7;ADRA1D;ADRA1A;CHRM3;ADRB2;HTR2B;HTR1F;HTR1D;HTR4;HRH1	Oligo
97	GO_Molecular_Function_2023__Phosphatidylcholine Transporter Activity (GO:0008525)	0.518372	2.29819	0	0.021779	0.295	12/17	23.01%	ATP10A;ABCA7;PCTP;ABCB4;PLTP;PITPNM2;PITPNC1;ABCB1;ATP8B2;MTTP;ABCG1;ABCA3	Oligo
98	GO_Cellular_Component_2023__Dendrite (GO:0030425)	-0.279394	-2.28972	0	0.00218351	0.158	112/263	27.05%	PNOC;ZWINT;PENK;CHRM4;SLC18A2;EPHB3;CALB1;HTR5A;CALB2;THY1;VSTM5;HTR1A;ARHGEF15;PDYN;HCN3;HSPA8;SLC32A1;NSG2;RGS14;CDK5;HTR1B;CPNE6;KCNA1;GABRG3;EPHB6;GCHFR;PRKCG;LAMP5;NSG1;RAB17;HRH3;GRIN1;NPFF;CHRM1;RGS8;HTR2A;GABRA1;CHRM2;KNDC1;PRSS12;GABRA4;HRH2;BRINP3;KCNC2;ZNF385A;EPHB2;HCN2;HTR7;AKAP5;ELAVL4;APOE;GABRA3;KCNB2;ZNF804A;KCNC1;GABRG2;SLC8A3;TUBB3;FOXM1;CHRM3;PLK2;KCNA2;SMO;DBN1;HTR2B;ATCAY;EP…	Oligo
99	GO_Molecular_Function_2023__NADH Dehydrogenase (Quinone) Activity (GO:0050136)	-0.462361	-2.28366	0	0.00233011	0.169	28/34	42.92%	NDUFC2;NDUFA4;NDUFB10;NDUFB8;NDUFB2;NDUFB7;NDUFA7;NDUFB3;NDUFS5;NDUFA2;NDUFB5;NDUFS7;NDUFS3;NDUFS8;NDUFA3;NDUFA6;NDUFS6;NDUFB9;NDUFB1;NDUFA8;NDUFA12;NDUFB4;NDUFC1;NDUFV1;NDUFS2;NDUFV2;NDUFB6;NDUFA5	Oligo
100	GO_Biological_Process_2023__Calcium-Ion Regulated Exocytosis (GO:0017156)	-0.506379	-2.28228	0	0.00233569	0.17	17/24	28.10%	SYT6;SYT5;RAB3A;SYT13;DOC2B;SYT4;SYT1;SYT10;SYT7;SYT17;RIMS4;SYT3;RIMS2;RIMS3;SYT2;RIMS1;VAMP2	Oligo
101	WikiPathway_2023_Human__Nonalcoholic Fatty Liver Disease WP4396	-0.317095	-2.27909	0	0.00247685	0.18	72/140	31.22%	COX8C;COX7A1;COX4I2;NDUFC2;CEBPA;NDUFB11;NDUFA4;IL1B;COX8A;COX6B2;COX6A1;BID;NDUFA11;NDUFB10;BBC3;UQCR10;VCAM1;COX7A2;CYC1;NDUFB8;NDUFA13;COX5B;NDUFB2;UQCR11;COX4I1;COX7C;PKLR;NDUFAB1;SDHD;COX6C;NDUFB7;NDUFA4L2;NDUFA7;BAX;COX7B2;PIK3R3;NDUFB3;NDUFS5;NDUFA2;NDUFB5;NDUFS7;COX6B1;NDUFC2-KCTD14;UQCRQ;UQCRB;COX5A;UQCRH;UQCRFS1;NDUFS3;NDUFS8;IRS1;NDUFA1;COX7B;ATF4;PIK3R2;NDUFA3;TGFB1;CASP8;NR1H4;NDUFA6…	Oligo
102	GO_Molecular_Function_2023__GABA-A Receptor Activity (GO:0004890)	-0.583761	-2.27724	0	0.00243996	0.181	14/17	22.88%	GABRD;GABRG3;GABRR1;GABRA4;GABRP;GABRQ;GABRA3;GABRG2;GABRB2;GABRG1;GABRA2;GABRA5;GABRR2;GABRB3	Oligo
103	GO_Cellular_Component_2023__GABA-A Receptor Complex (GO:1902711)	-0.583761	-2.27724	0	0.00243996	0.181	14/17	22.88%	GABRD;GABRG3;GABRR1;GABRA4;GABRP;GABRQ;GABRA3;GABRG2;GABRB2;GABRG1;GABRA2;GABRA5;GABRR2;GABRB3	Oligo
104	GO_Biological_Process_2023__Heart Contraction (GO:0060047)	-0.450344	-2.2766	0	0.00243308	0.182	22/34	26.27%	TNNI3;SGCZ;TCAP;TNNT2;MYH6;SCN3B;CSRP3;ACTC1;SCN4B;SGCG;SLC8A1;MYBPC3;SCN2B;RANGRF;KCNQ1;TTN;SOD1;SCN1B;SCN5A;SGCD;TRDN;KCNH2	Oligo
105	GO_Biological_Process_2023__Adenylate Cyclase-Modulating G Protein-Coupled Receptor Signaling Pathway (GO:0007188)	-0.322132	-2.27653	0	0.00240478	0.182	65/128	24.69%	CORT;GPR3;VIP;GNAT3;ADCYAP1;DRD5;GPR26;MCHR1;PTHLH;DRD1;FFAR3;RAMP2;PTH1R;CNR1;HTR1B;PTGER4;MTNR1A;TSHR;ADRA1B;ADM5;CALCR;CHRM2;UTS2;GNA15;GIPR;VIPR1;VIPR2;ADGRG5;ADCY7;ADRA2A;MC4R;RAMP3;AKAP5;ADGRD2;ADCY1;ADRA1D;ADRB2;GABBR2;ADGRG7;ADGRE1;NPY1R;GPR65;CRHR2;ADGRB1;SCTR;HTR1F;ADGRL2;PTGFR;TCP11;ADORA2B;PTGER1;ADGRE3;HTR1D;GNAT2;GPER1;ADGRF5;RIMS2;OPRL1;CALCRL;ADCY2;AKAP12;GRM8;PTGER3;RAMP1;ADGRG4	Oligo
106	GO_Cellular_Component_2023__Synaptic Vesicle Membrane (GO:0030672)	-0.394597	-2.27029	0	0.002601	0.198	34/51	34.43%	SLC17A6;SYT5;SLC18A2;SLC32A1;DOC2A;SYN1;RAB3B;SYNGR3;SLC17A7;UNC13A;SYT4;SYN2;OTOF;ICA1;SYT1;RPH3A;SLC17A8;SV2C;SYNPR;GABRA2;SYPL2;RAB26;MCTP2;UNC13C;SYT2;SV2B;SYNGR2;VAMP2;SYP;SYPL1;SEMA4C;PTPRN2;SV2A;MCTP1	Oligo
107	GO_Cellular_Component_2023__Voltage-Gated Potassium Channel Complex (GO:0008076)	-0.37461	-2.26861	0	0.00265575	0.203	40/68	23.95%	KCNF1;LRRC55;KCNV1;KCNQ2;KCNA6;KCNS1;KCNJ8;HCN3;KCNS2;KCNA1;KCNA4;KCNG2;KCNJ4;KCND1;KCNH4;KCNMB2;KCNA3;KCNC2;KCNJ6;HCN2;KCNQ4;KCNB2;KCNC1;KCNA2;KCNQ3;KCNA5;HCN1;KCNJ3;KCNB1;KCND2;KCNE2;KCNJ16;KCNG3;KCNQ1;KCNQ5;KCNC4;KCNJ5;KCNMB1;LRRC38;KCNAB3	Oligo
108	GO_Biological_Process_2023__Pyruvate Metabolic Process (GO:0006090)	-0.414904	-2.26821	0.00147493	0.00266759	0.206	37/46	43.92%	KRT17;LDHC;LDHAL6B;HKDC1;ENO4;NR4A3;PKLR;PFKM;LDHB;GAPDHS;ENO3;GAPDH;SDS;TPI1;ALDOC;HK1;PCK2;GCK;LDHAL6A;HOGA1;ME3;LDHA;PGAM2;UCP2;ENO2;ALDOB;PGAM1;PGK1;GPI;ENO1;VDAC1;PFKL;PKM;PFKFB2;PDHB;PDHA1;SRR	Oligo
109	MSigDB_Hallmark_2020__Pancreas Beta Cells	-0.472662	-2.26317	0	0.00282344	0.22	17/30	19.11%	SST;PCSK1;ABCC8;SYT13;CHGA;DPP4;DCX;PKLR;HNF1A;PAK3;SPCS1;INSM1;VDR;LMO2;MAFB;PCSK2;SRP14	Oligo
110	GO_Molecular_Function_2023__Inward Rectifier Potassium Channel Activity (GO:0005242)	-0.515285	-2.26212	0	0.00281279	0.221	18/23	30.81%	KCNJ8;KCNJ12;KCNJ11;KCNJ4;KCNJ6;KCNJ3;ABCC9;KCNE2;KCNJ16;KCNJ13;KCNH6;KCNJ5;KCNH7;KCNN2;KCNH2;KCNK1;KCNK6;KCNN3	Oligo
111	GO_Biological_Process_2023__Regulation Of Interleukin-12 Production (GO:0032655)	0.384189	2.25708	0	0.0290826	0.384	15/37	9.45%	TLR2;CMKLR1;TLR4;IFNG;TLR3;PLCG2;JAK3;LILRB1;LGALS9;CD40;CLEC7A;THBS1;IRAK3;LAPTM5;MDK	Oligo
112	GO_Biological_Process_2023__Xenobiotic Transport (GO:0042908)	0.489538	2.25409	0	0.0285987	0.391	12/19	17.18%	SLC22A3;SLC22A1;GJA1;SLC22A2;ABCG2;ABCC3;SLC47A1;ABCB1;ABCC2;ABCC11;SLC22A4;SLC15A2	Oligo
113	WikiPathway_2023_Human__GPCRs Other WP117	-0.371342	-2.25167	0	0.00310479	0.241	39/67	23.96%	GPR88;GPR162;OR3A3;ACKR1;MCHR2;GPR183;CNR1;GNRHR;F2R;HTR2A;GPR61;CHRM2;GPR83;GPR18;CCKBR;FSHR;HTR7;PROKR2;CXCR2;ADRA1D;CHRM3;SMO;ADRB2;OR1F1;SSTR2;P2RY13;NTSR1;LGR6;HTR1F;ADGRL2;PTGFR;ADGRE3;GPR132;ADGRF5;RXFP1;GRM8;GRM1;CELSR1;GPR62	Oligo
114	GO_Biological_Process_2023__Regulation Of Dendrite Extension (GO:1903859)	-0.565464	-2.24873	0	0.00315119	0.244	12/17	26.46%	CPNE6;OSTN;UNC13A;SYT4;NEDD4L;SYT1;SYT17;SYT3;RIMS2;CPNE9;SYT2;RIMS1	Oligo
115	GO_Molecular_Function_2023__Ligand-Gated Monoatomic Anion Channel Activity (GO:0099095)	-0.574936	-2.24865	0	0.00311766	0.244	14/17	23.28%	GABRG3;GABRA1;GABRA4;GABRA3;GABRG2;GLRA3;GABRB2;GABRG1;GABRA2;GABRA5;GLRB;GLRA2;GABRB3;GLRA1	Oligo
116	MSigDB_Hallmark_2020__Myc Targets V1	-0.290368	-2.24587	0	0.00315318	0.249	165/199	58.41%	MYC;CYC1;H2AZ1;HSPE1;CDC45;NHP2;NDUFAB1;PPIA;NME1;RPS2;POLE3;RAN;RPS5;RPL18;C1QBP;MAD2L1;SNRPD2;MRPL23;COX5A;PHB2;HSP90AB1;RPS10;LDHA;PCNA;PSMB3;PSMD8;CDC20;RANBP1;LSM7;LSM2;EEF1B2;RPLP0;RPL34;TUFM;SRM;RPS6;CCT7;PSMA4;RPS3;TRIM28;RPL6;PSMA7;PSMA1;PCBP1;RACK1;NOP16;IMPDH2;MRPL9;PGK1;PRDX4;KPNA2;CCT5;SRSF2;RPL14;APEX1;PRPF31;PRPS2;SNRPA;TYMS;MCM7;CCNA2;RRP9;POLD2;SET;MCM6;RUVBL2;CDK4;VDAC1;MCM4;ERH…	Oligo
117	GO_Biological_Process_2023__Synaptic Vesicle Cycle (GO:0099504)	-0.441898	-2.24335	0	0.00323626	0.257	18/36	18.38%	WNT7A;SLC17A6;SLC18A2;CPLX1;RAB3A;SLC32A1;CDK5;SLC17A7;OTOF;STX1A;PCLO;SYT10;SNAP25;CPLX2;SLC17A8;SYT7;CPLX4;SNAPIN	Oligo
118	MSigDB_Hallmark_2020__Inflammatory Response	0.24362	2.24044	0	0.0305117	0.423	66/174	18.00%	RGS1;PROK2;CCL2;TLR2;CDKN1A;LTA;NMUR1;BDKRB1;CMKLR1;ITGA5;PTGIR;PCDH7;EBI3;ROS1;ADM;APLNR;HAS2;F3;INHBA;GP1BA;ICAM1;TLR3;IL15RA;SELL;EMP3;OPRK1;IL10RA;LCK;EDN1;IL15;RNF144B;CD40;ITGB3;SERPINE1;RTP4;NFKBIA;TLR1;CCL24;LCP2;IL4R;SLC28A2;KLF6;STAB1;IL2RB;CSF1;TIMP1;AXL;IL18R1;SLC4A4;SELE;SLC7A2;ABCA1;CYBB;TNFAIP6;NMI;FPR1;PLAUR;IL1R1;IRAK2;ITGB8;MSR1;MET;CD55;ICOSLG;BTG2;P2RX4	Oligo
119	GO_Molecular_Function_2023__Serine-Type Endopeptidase Activity (GO:0004252)	-0.350481	-2.2178	0	0.00404425	0.308	47/79	28.66%	PRTN3;MMP2;PCSK1;PRSS3;MASP1;CNTN1;MMP19;CEL;C1RL;OVCH2;CTRB2;F2;PRSS12;CTRL;MASP2;DPP4;KLK14;CTSV;PROC;PCSK4;PRSS36;CTSH;F10;GZMA;CFD;APEH;MMP14;TLL1;F12;PLG;PCSK2;SEC11C;RHBDL1;CFB;KLK5;KLK6;F7;TMPRSS2;HTRA2;ADAM8;C1R;PRSS48;CTSS;LPA;CELA2B;PRSS53;PARL	Oligo
120	GO_Cellular_Component_2023__Exocytic Vesicle Membrane (GO:0099501)	-0.387962	-2.21617	0	0.00410708	0.314	33/50	34.43%	SLC17A6;SYT5;SLC18A2;SLC32A1;SYN1;RAB3B;SYNGR3;SLC17A7;UNC13A;SYT4;SYN2;OTOF;ICA1;SYT1;RPH3A;SLC17A8;SV2C;SYNPR;GABRA2;SYPL2;RAB26;MCTP2;UNC13C;SYT2;SV2B;SYNGR2;VAMP2;SYP;SYPL1;SEMA4C;PTPRN2;SV2A;MCTP1	Oligo
121	GO_Biological_Process_2023__Inorganic Cation Transmembrane Transport (GO:0098662)	-0.271322	-2.21036	0	0.00428106	0.327	132/255	32.44%	SLC30A3;KCNF1;CACNA1H;FXYD2;LRRC55;ATP6V0C;UCP1;TRPM1;KCNV1;SLC39A4;SLC6A2;TRPC5;SLC36A2;ATP1A3;KCNQ2;KCNA6;KCNS1;KCNJ8;RHAG;HCN3;SCN3B;SLC36A3;KCNS2;TCIRG1;KCNJ11;ABCC8;ATP6V0B;KCNA1;KCNA4;KCNG2;SLC40A1;SLC30A8;SLC24A5;ATP6V1F;KCNK16;KCND1;KCNH4;SLC30A2;SLC6A17;KCNK2;KCNK3;KCNA3;SCN2A;CACNA1S;SLC12A7;CACNA1G;ATP5PO;KCNC2;SLC9A7;HCN2;KCNK7;ASIC4;KCNQ4;KCNB2;KCNC1;ATP5MF;SLC8A3;SCN4B;TRPV2;HTR3C;S…	Oligo
122	GO_Biological_Process_2023__Axon Guidance (GO:0007411)	-0.303837	-2.20995	0	0.00427534	0.33	65/145	24.28%	SEMA3G;ARHGEF25;LRTM2;EPHB3;CXCL12;EFNA4;WNT5A;CNTN1;VEGFA;BDNF;EFNB1;SEMA5A;GAP43;EPHB6;RAC3;IGSF9;EFNB3;PLXNA2;RET;NRXN1;LGI1;EMB;EPHB2;DPYSL5;EFNA3;LRTM1;NOTCH3;UNC5A;TUBB3;SMO;DCC;PLXNA4;TNR;PLXND1;EPHA4;CNTN4;LGR6;NRCAM;PTPRO;L1CAM;PLEKHG4;NTN1;PLEKHG4B;NELL1;SHH;ROBO2;RNF165;NIBAN2;NELL2;SEMA3F;EPHA6;SLIT1;ANOS1;PLXNB2;EPHA7;EFNA5;EPHA5;PLXNA3;CNTN5;SEMA6C;SCN1B;LYPLA2;EFNA2;SEMA3A;DSCAM	Oligo
123	GO_Biological_Process_2023__Regulation Of Peptidase Activity (GO:0052547)	-0.516553	-2.20661	0	0.00442584	0.34	17/21	37.80%	MAPK12;CAV1;CST3;NDUFA13;CTSV;CTSH;CSTB;PSMB8;ECM1;CTSS;CTSL;CTSK;PINK1;FURIN;ATP13A2;SVBP;CTSB	Oligo
124	KEGG_2021_Human__Cocaine addiction	-0.407248	-2.20582	0	0.00444609	0.344	29/45	35.54%	SLC18A2;DRD1;PDYN;DDC;CDK5;BDNF;GRM2;GRIN1;FOSB;CREB3L3;CREB3L1;GRIN2B;MAOA;GRIN3B;PPP1R1B;RGS9;MAOB;GRIN3A;GRIN2C;GRIN2A;CREB3;ATF4;GRIN2D;RELA;CREB3L4;DLG4;CDK5R1;ATF6B;GPSM1	Oligo
125	MSigDB_Hallmark_2020__Interferon Gamma Response	0.241159	2.2043	0	0.0373067	0.499	64/182	17.28%	SAMHD1;RSAD2;MYD88;CCL2;CDKN1A;IDO1;IFI44;DDX60;CMKLR1;FCGR1A;IFI44L;HLA-DQA1;MT2A;IRF4;OAS3;ICAM1;IL15RA;SAMD9L;IL10RA;PLSCR1;EPSTI1;IFITM3;IL15;CASP4;CD40;BANK1;DHX58;PARP14;TNFAIP3;RTP4;SOCS3;NFKBIA;IFITM2;TAP1;FAS;LCP2;CIITA;IL4R;CASP7;IL2RB;APOL6;TXNIP;SELP;HLA-DMA;IRF9;MVP;TRIM25;HELZ2;NLRC5;TRIM14;TNFAIP6;XAF1;CD38;MTHFD2;NMI;FPR1;ARL4A;HERC6;MX1;OGFR;NOD1;ISG20;RNF31;STAT2	Oligo
126	WikiPathway_2023_Human__Dravet Syndrome WP5200	-0.480496	-2.20388	0	0.00451097	0.353	19/27	36.26%	MAPK11;SCN3B;PRR5;SCN2A;SCN1A;SCN3A;SCN4B;KCNA2;SCN2B;HCN1;CAMK2A;FGF13;PCDH19;SCN1B;MLST8;PRKCA;STXBP1;CALM1;SCN8A	Oligo
127	KEGG_2021_Human__Alzheimer disease	-0.261972	-2.20373	0	0.00447652	0.354	164/334	34.72%	WNT7A;COX8C;WNT10B;COX7A1;COX4I2;WNT16;PTGS2;ATP5MC1;PLCB2;NDUFC2;WNT5A;NDUFB11;NDUFA4;IL1B;TUBB2A;FZD9;COX8A;TUBA4A;SLC25A5;CDK5;COX6B2;HSD17B10;COX6A1;BID;CALM3;NDUFA11;IRS4;ATP5MC3;WNT2;WNT4;DKK1;PSMB6;NDUFB10;UQCR10;ATP5F1D;GRIN1;CHRM1;PSENEN;COX7A2;CYC1;NDUFB8;GPR83;TUBB2B;WNT9A;CACNA1S;NDUFA13;TUBB4B;ATP5PO;COX5B;NDUFB2;TUBA3D;GRIN2B;NOS2;FRAT2;SLC25A4;TUBA1B;APOE;CACNA1F;UQCR11;COX4I1;COX7…	Oligo
128	GO_Molecular_Function_2023__Serotonin Receptor Activity (GO:0099589)	-0.4986	-2.20301	0	0.00445155	0.356	16/23	22.68%	CHRM4;HTR5A;HTR1A;HTR1B;HRH3;HTR2A;CHRM2;HRH2;HTR7;HTR3C;CHRM3;HTR2B;HTR1F;HTR1D;HTR4;HTR3E	Oligo
129	WikiPathway_2023_Human__Cardiac Progenitor Differentiation WP2406	-0.417131	-2.20091	0.00141443	0.00454954	0.367	20/41	16.07%	MESP1;KIT;PDGFRA;NOG;TNNI3;MESP2;SOX1;LIN28A;THY1;TNNT2;MYH6;IGF1;DKK1;CXCR4;MEF2C;ACTC1;GATA4;BMP4;NODAL;KDR	Oligo
130	GO_Biological_Process_2023__Mitochondrial Respiratory Chain Complex I Assembly (GO:0032981)	-0.388133	-2.19535	0	0.0047916	0.393	37/53	42.92%	NDUFC2;NDUFB11;NDUFA11;NDUFB10;NDUFB8;NDUFAF3;NDUFA13;NDUFB2;NDUFAB1;NDUFB7;NDUFB3;NDUFS5;NDUFA2;NDUFB5;NDUFS7;NDUFS3;NDUFS8;NDUFA1;DMAC1;NDUFA3;NDUFA6;BCS1L;NDUFB9;NDUFAF8;NDUFB1;NDUFA8;NDUFB4;NDUFC1;TMEM126A;TMEM186;ECSIT;DMAC2;NDUFS2;NDUFAF4;NDUFAF1;NDUFB6;NDUFA5	Oligo
131	GO_Biological_Process_2023__NADH Dehydrogenase Complex Assembly (GO:0010257)	-0.388133	-2.19535	0	0.0047916	0.393	37/53	42.92%	NDUFC2;NDUFB11;NDUFA11;NDUFB10;NDUFB8;NDUFAF3;NDUFA13;NDUFB2;NDUFAB1;NDUFB7;NDUFB3;NDUFS5;NDUFA2;NDUFB5;NDUFS7;NDUFS3;NDUFS8;NDUFA1;DMAC1;NDUFA3;NDUFA6;BCS1L;NDUFB9;NDUFAF8;NDUFB1;NDUFA8;NDUFB4;NDUFC1;TMEM126A;TMEM186;ECSIT;DMAC2;NDUFS2;NDUFAF4;NDUFAF1;NDUFB6;NDUFA5	Oligo
132	WikiPathway_2023_Human__Platelet Mediated Interactions With Vascular And Circulating Cells WP4462	0.543444	2.19503	0	0.0385339	0.519	10/15	13.89%	CCL2;TLR2;TGFB3;SELPLG;TLR4;ICAM1;CD40;SELP;SELE;TGFB2	Oligo
133	GO_Biological_Process_2023__Neurotransmitter Transport (GO:0006836)	-0.396745	-2.19495	0	0.00475615	0.394	26/47	21.62%	SLC17A6;SLC18A2;SLC6A2;SLC32A1;SYN1;SLC1A6;HRH3;SLC17A7;UNC13A;SYN2;NRXN1;LIN7B;SLC29A4;SLC29A2;SYT1;SNAP25;SLC17A8;GABRA2;GRM4;SNAPIN;SLC6A4;SNPH;SLC1A1;PPFIA3;NRXN2;SLC6A16	Oligo
134	WikiPathway_2023_Human__Burn Wound Healing WP5055	0.319018	2.1912	0	0.0382928	0.532	23/58	12.29%	MYD88;CCL2;BCL2;F13A1;TGFB3;TNC;TLR4;FGFR3;KLF4;TAGLN;PDGFRB;INHBA;ICAM1;HGF;FGFR4;IFNA2;IL15;S100A11;EGF;SERPINH1;TIMP1;FGFR1;MMP28	Oligo
135	GO_Molecular_Function_2023__Calcium-Dependent Phospholipid Binding (GO:0005544)	-0.409308	-2.18586	0	0.0052019	0.417	28/42	34.43%	SYT6;SYT5;CPNE6;SYT13;DOC2B;SYT4;SYT1;PCLO;SYT10;RPH3A;ANXA6;CPNE5;CPNE7;SYT7;SYT17;ANXA13;SYT3;CPNE9;MCTP2;PLA2G4A;PLA2G4E;CPNE8;SYT2;PLA2G4C;CPNE4;ESYT3;SYT15;MCTP1	Oligo
136	KEGG_2021_Human__Calcium signaling pathway	-0.277809	-2.1858	0	0.00516339	0.417	96/211	24.14%	DRD5;PDGFRA;CACNA1H;TACR2;PDGFB;P2RX5;HTR5A;CAMK1;ITPKA;PLCB2;VEGFC;DRD1;SLC25A5;VEGFA;SPHK1;CASQ1;CALM3;P2RX1;PRKCG;GRIN1;F2R;CHRM1;CXCR4;HTR2A;ADRA1B;FGF10;NTRK1;CHRM2;ATP2B2;RET;GNA15;CACNA1S;NGF;FGF18;ADCY7;CACNA1G;HRH2;FGF5;CCKBR;TACR1;CAMK4;NOS2;HTR7;SLC25A4;CAMK1G;PLN;FGF9;CACNA1F;ADCY1;SLC8A3;ORAI2;FGF7;ADRA1D;FLT1;ADRA1A;CHRM3;FGF17;FGF20;ADRB2;CYSLTR2;HTR2B;CAMK2B;PLCB4;ATP2A3;NTSR1;GRM…	Oligo
137	GO_Biological_Process_2023__Positive Regulation Of Tumor Necrosis Factor Superfamily Cytokine Production (GO:1903557)	0.31036	2.17826	0	0.0405449	0.561	36/66	25.89%	TLR2;LILRA2;AMH;TLR4;HSPB1;IFNG;SPN;OAS3;TLR3;PLCG2;LGALS9;PTPRC;CLEC7A;LY96;THBS1;FCGR3A;TLR1;AGER;HLA-E;CYBA;CD84;FADD;EHHADH;IFIH1;PTPRJ;CLU;FRMD8;TIRAP;RIGI;LCP1;FZD5;STAT3;MAVS;BCL10;HAVCR2;RIPK1	Oligo
138	MSigDB_Hallmark_2020__KRAS Signaling Up	-0.28993	-2.17578	0	0.00581285	0.461	88/175	30.39%	WNT7A;PCP4;RBP4;USH1C;G0S2;CIDEA;ETV5;SCG3;ANXA10;PTGS2;TMEM176A;TNNT2;ETV1;IL1B;BTC;TMEM158;IKZF1;ACE;PCSK1N;HKDC1;CCND2;ID2;GYPC;TSPAN1;CXCR4;NAP1L2;GADD45G;TSPAN7;IGFBP3;NGF;TSPAN13;EPHB2;ANGPTL4;RGS16;C3AR1;ST6GAL1;FGF9;CFH;GABRA3;TNFRSF1B;SNAP25;DUSP6;EREG;IL7R;IL1RL2;HSD11B1;GNG11;CD37;GPNMB;IL33;PRDM1;ITGBL1;SPARCL1;GUCY1A1;MAFB;TRIB2;PSMB8;PDCD1LG2;SPP1;ENG;PRKG2;CFB;ADGRA2;CPE;TRIB1;GALN…	Oligo
139	GO_Biological_Process_2023__Negative Regulation Of Neuron Differentiation (GO:0045665)	-0.510002	-2.17221	0	0.00593376	0.469	13/21	24.95%	DISP3;HEY1;HES5;DLX2;TUNAR;SOX3;DLX1;HES1;CNTN4;CALR;DTX1;B2M;BMP7	Oligo
140	GO_Biological_Process_2023__Regulated Exocytosis (GO:0045055)	-0.390404	-2.17096	0	0.00596306	0.476	35/49	39.26%	SYT6;CPLX1;RAB3A;CDK5;SYT13;SYNGR3;OTOF;STX1A;PCLO;SYT10;SNAP25;CPLX2;STEAP2;CPLX4;SYT17;PLEK;SNAPIN;SYT3;RAB26;RIMS2;CRHBP;RIMS3;LYN;RIMS1;SYNGR2;VAMP2;RAB11FIP5;SYT15;RAB11B;STXBP1;TMEM79;SYNGR1;DNAJC5;PIP5K1C;SDF4	Oligo
141	WikiPathway_2023_Human__Peptide GPCRs WP24	-0.388946	-2.16964	0	0.00600798	0.483	31/47	28.13%	SSTR3;TACR2;ACKR1;NPY5R;SSTR1;GNRHR;CXCR6;CXCR4;TSHR;CX3CR1;OPRD1;MC4R;CCKBR;FSHR;TACR1;C3AR1;CXCR2;GALR1;SSTR2;HCRTR1;CCR7;NPY1R;NTSR1;EDNRB;OPRL1;OXTR;TACR3;OPRM1;C5AR1;FPR3;CCR9	Oligo
142	GO_Biological_Process_2023__Positive Regulation Of Tumor Necrosis Factor Production (GO:0032760)	0.310736	2.16799	0	0.0425127	0.592	32/63	23.61%	TLR2;LILRA2;AMH;TLR4;HSPB1;IFNG;SPN;OAS3;TLR3;PLCG2;LGALS9;PTPRC;CLEC7A;LY96;THBS1;FCGR3A;TLR1;HLA-E;CYBA;CD84;FADD;EHHADH;IFIH1;PTPRJ;CLU;FRMD8;TIRAP;RIGI;LCP1;FZD5;STAT3;MAVS	Oligo
143	GO_Biological_Process_2023__Regulation Of Monoatomic Ion Transmembrane Transporter Activity (GO:0032412)	-0.351243	-2.16454	0.00138122	0.00627598	0.505	40/67	32.88%	CRH;FXYD2;FXYD6;HCN3;SCN3B;FXYD4;FXYD3;SHISA8;MEF2C;CAV3;CACNG8;YWHAH;NEDD4L;HCN2;PTPN3;CACNG2;SCN4B;CHRM3;CACNG3;FXYD1;SCN2B;HCN1;FXYD7;RANGRF;SHISA9;CRHBP;PHB2;CAPN1;FGF12;SCN1B;MAPK8IP2;UTRN;DAPK1;OPRM1;PPIF;RELN;CACNA1D;PRRT1;FHL1;DLG4	Oligo
144	WikiPathway_2023_Human__Type II Interferon Signaling WP619	0.373352	2.15735	0.0027933	0.0450203	0.626	13/31	12.73%	IFNG;IRF4;ICAM1;H4C14;IFNA2;SOCS3;IFI6;TAP1;CIITA;IRF9;GBP1;CYBB;SPI1	Oligo
145	GO_Biological_Process_2023__Vesicle-Mediated Transport In Synapse (GO:0099003)	-0.555823	-2.15617	0.00324675	0.00679305	0.532	13/17	28.10%	CPLX1;RAB3A;CDK5;OTOF;STX1A;PCLO;SYT10;SNAP25;CPLX2;CPLX4;SNAPIN;RIMS1;VAMP2	Oligo
146	WikiPathway_2023_Human__Glycolysis And Gluconeogenesis WP534	-0.410293	-2.15501	0	0.00686123	0.54	31/41	39.47%	LDHC;LDHAL6B;FBP2;PFKP;FBP1;PKLR;PFKM;LDHB;ENO3;GAPDH;SLC2A5;TPI1;ALDOC;HK1;GCK;MDH2;LDHA;GOT1;PGAM2;ENO2;MDH1;ALDOA;ALDOB;SLC2A3;PGAM1;PGK1;GPI;ENO1;MPC2;PFKL;PKM	Oligo
147	GO_Biological_Process_2023__Regulation Of Heterotypic Cell-Cell Adhesion (GO:0034114)	0.480054	2.15161	0.00255102	0.0451329	0.637	8/16	10.64%	CD44;KLF4;LCK;SKAP1;MAPK7;AGER;APOA1;GCNT2	Oligo
148	GO_Biological_Process_2023__Positive Regulation Of Dendrite Extension (GO:1903861)	-0.55131	-2.14809	0	0.00729455	0.568	11/16	26.46%	CPNE6;UNC13A;SYT4;NEDD4L;SYT1;SYT17;SYT3;RIMS2;CPNE9;SYT2;RIMS1	Oligo
149	GO_Biological_Process_2023__Regulation Of Macrophage Derived Foam Cell Differentiation (GO:0010743)	0.435153	2.14628	0	0.0448293	0.646	14/23	22.15%	AGTR1;CETP;PLA2G10;ITGB3;NFKBIA;PPARG;CSF1;PRKCH;AGT;MSR1;PPARA;ABCG1;LCP1;NR1H3	Oligo
150	KEGG_2021_Human__GABAergic synapse	-0.333304	-2.14306	0	0.00764337	0.581	41/86	22.88%	GNG3;GABRD;GAD2;GNG13;SLC12A5;SLC32A1;GAD1;GNG10;GLS2;GABRG3;PRKCG;GABRR1;GABRA1;GABRA4;CACNA1S;ADCY7;KCNJ6;GABRP;GABRQ;GNG2;CACNA1F;ADCY1;GABRA3;GABRG2;HAP1;GNG4;GABBR2;GABRB2;GABRG1;GNG11;GNGT1;GABRA2;GABRA5;GABARAPL2;SLC6A11;SRC;GNB2;ADCY2;GABRR2;GLUL;GABRB3	Oligo
151	GO_Biological_Process_2023__Regulation Of Monoatomic Ion Transmembrane Transport (GO:0034765)	-0.486255	-2.14122	0.00310078	0.00773349	0.591	15/25	22.78%	KCNJ8;KCNJ12;KCNJ11;KCNJ4;GRIN1;KCNJ6;NEDD4L;GRIN2B;KCNJ3;KCNJ16;GRIN2C;SCN10A;KCNJ13;GRIN2A;KCNJ5	Oligo
152	GO_Biological_Process_2023__Positive Regulation Of Nitrogen Compound Metabolic Process (GO:0051173)	0.39461	2.13963	0.00301205	0.0451929	0.667	13/30	13.01%	AGTR1;UHRF1;KLF4;IFNG;INHBA;PLA2G10;SLCO1C1;NFKBIA;PAX8;EGF;MAPK7;CSF1;WFS1	Oligo
153	MSigDB_Hallmark_2020__Interferon Alpha Response	0.281458	2.13678	0	0.0449758	0.673	38/92	18.47%	RSAD2;IFI44;DDX60;IFI44L;UBA7;PARP9;SAMD9L;TENT5A;SELL;PLSCR1;EPSTI1;IFITM3;IL15;DHX58;PARP14;RTP4;IFITM2;TAP1;GMPR;IL4R;TXNIP;CSF1;IRF9;TRIM25;HELZ2;TRIM14;NMI;TRIM5;HERC6;MX1;OGFR;ISG20;RNF31;STAT2;TMEM140;MOV10;PARP12;IFIH1	Oligo
154	KEGG_2021_Human__Pathways of neurodegeneration	-0.243564	-2.12684	0	0.00904601	0.647	203/432	34.72%	WNT7A;COX8C;WNT10B;MAPK12;COX7A1;MAPK11;COX4I2;WNT16;PTGS2;NEFH;GPX3;ATP5MC1;PLCB2;NDUFC2;WNT5A;NDUFB11;SEPTIN5;NDUFA4;IL1B;PDYN;TUBB2A;FZD9;UBB;COX8A;TUBA4A;SLC25A5;CDK5;BDNF;COX6B2;HSD17B10;COX6A1;BID;CALM3;NDUFA11;ATP5MC3;WNT2;WNT4;DKK1;PSMB6;NDUFB10;UQCR10;PRKCG;ATP5F1D;GRIN1;CHRM1;COX7A2;NEFM;CYC1;NDUFB8;NEFL;TUBB2B;WNT9A;CACNA1S;NDUFA13;DNAH5;TUBB4B;ATP5PO;COX5B;NDUFB2;TUBA3D;GRIN2B;NOS2;FR…	Oligo
155	GO_Biological_Process_2023__Regulation Of Chondrocyte Differentiation (GO:0032330)	0.439029	2.12204	0.00268097	0.0490757	0.714	12/21	17.75%	ZBTB16;EFEMP1;SCIN;ADAMTS12;MDK;SOX9;BMPR1B;SOX5;PKDCC;GDF5;LOXL2;SOX6	Oligo
156	GO_Biological_Process_2023__Regulation Of T Cell Proliferation (GO:0042129)	-0.367708	-2.12013	0	0.00954549	0.672	31/52	28.87%	CD70;VTCN1;CD86;IL1B;TNFRSF21;IL23R;TNFSF8;PLA2G5;IL23A;VCAM1;PNP;CD274;NCKAP1L;FOXP3;TNFRSF1B;CEBPB;SFTPD;HLA-DPA1;ANXA1;CCL5;GPNMB;CCDC88B;HLA-DRB1;CD276;PDCD1LG2;ZP3;CD80;ARG1;TNFSF9;NCK2;MYDGF	Oligo
157	GO_Biological_Process_2023__Positive Regulation Of T Cell Proliferation (GO:0042102)	-0.386313	-2.11896	0.00148148	0.00963305	0.676	27/46	28.30%	PYCARD;CD70;CD86;IL1B;IGF1;IL23R;IL23A;VCAM1;IGFBP2;PNP;CD274;NCKAP1L;HLA-DPA1;ANXA1;CCL5;CCDC88B;AIF1;CD276;SYK;PDCD1LG2;IL12RB1;ZP3;CD80;TNFSF9;NCK2;IL18;CD24	Oligo
158	GO_Cellular_Component_2023__Mitochondrial Inner Membrane (GO:0005743)	-0.250316	-2.11894	0	0.00955599	0.676	197/352	42.36%	UCP1;SCO2;CKMT1A;ATP5MC1;NDUFC2;ALAS2;NDUFB11;NDUFA4;COX8A;SLC25A5;COA3;COX6A1;SDSL;NDUFA11;MGARP;MRPL54;ATP5MC3;NDUFB10;UQCR10;GADD45GIP1;ATP5F1D;UQCC3;CYC1;NDUFB8;AIFM3;SLC30A2;NDUFAF3;TIMM10;MICOS13;NDUFA13;TMEM160;ATP5PO;COX5B;NDUFB2;MRPS28;MRPL40;SLC25A4;MRPL12;AURKAIP1;MTLN;UQCR11;MRPS6;ATP5MF;COX4I1;COX7C;TIMM13;SHMT2;SLC25A22;NDUFAB1;ATP5MJ;SDHD;MRPL55;COX6C;ATP5PF;NDUFB7;MPV17L2;MRPL17;S…	Oligo
159	GO_Molecular_Function_2023__G Protein-Coupled Serotonin Receptor Activity (GO:0004993)	-0.51406	-2.11795	0	0.00947853	0.679	14/20	21.23%	CHRM4;HTR5A;HTR1A;HTR1B;HRH3;HTR2A;CHRM2;HRH2;HTR7;CHRM3;HTR2B;HTR1F;HTR1D;HTR4	Oligo
160	GO_Molecular_Function_2023__G Protein-Coupled Amine Receptor Activity (GO:0008227)	-0.51406	-2.11795	0	0.00947853	0.679	14/20	21.23%	CHRM4;HTR5A;HTR1A;HTR1B;HRH3;HTR2A;CHRM2;HRH2;HTR7;CHRM3;HTR2B;HTR1F;HTR1D;HTR4	Oligo
161	WikiPathway_2023_Human__Kynurenine Pathway And Links To Cell Senescence WP5044	0.444471	2.11483	0	0.050472	0.734	9/21	9.02%	CDKN1A;IDO1;TLR4;IFNG;NOS1;KYNU;IDO2;TDO2;IL1R2	Oligo
162	KEGG_2021_Human__Olfactory transduction	0.281188	2.1145	0	0.0491981	0.736	32/80	15.62%	OR4F6;OR7C1;OR7A5;OR6J1;OR9A4;OR7D4;OR4F15;OR52A1;OR10H1;GRK3;OR2M3;OR7D2;SLC24A4;OR11A1;OR2K2;OR1A1;OR11G2;OR1L8;OR2M2;OR2L2;OR1I1;PDE2A;OR2M4;SLC8A2;OR2AK2;OR2F1;OR7A17;OR51M1;OR1B1;PRKG1;ARRB1;ANO2	Oligo
163	GO_Molecular_Function_2023__Voltage-Gated Monoatomic Ion Channel Activity (GO:0005244)	-0.475631	-2.11318	0	0.00993339	0.698	13/23	20.06%	CACNA1H;KCNJ8;KCNJ11;GRIN1;KCNA3;SCN1A;GRIN2B;GRIN3B;HCN1;GRIN3A;KCND2;GRIN2C;GRIN2A	Oligo
164	GO_Molecular_Function_2023__G Protein-Coupled Receptor Activity (GO:0004930)	-0.276121	-2.11054	0	0.0101152	0.706	78/179	20.58%	NPY;GPR88;DRD5;GPR26;MCHR1;GPR6;SSTR3;KISS1R;DRD1;FFAR3;MCHR2;PTH1R;GPR183;CNR1;RORB;GPR150;GRM2;GNRHR;MTNR1A;RGR;F2R;CXCR6;CXCR4;TSHR;GPR61;GPR85;GPR83;ADGRA1;GPR22;MAS1;GIPR;VIPR1;GPR18;CX3CR1;VIPR2;ADGRG5;OPRD1;C3AR1;GPR34;ADGRD2;PROKR2;CXCR2;GPR27;P2RY14;GALR1;QRFPR;FFAR4;GPR149;CYSLTR2;GABBR2;PGR;ADGRG7;ADGRE1;P2RY13;HCRTR1;CCR7;NTSR1;GRM5;GPR65;LGR6;CRHR2;GRM4;ADGRB1;SCTR;OPN4;NPFFR2;GPR75;…	Oligo
165	GO_Biological_Process_2023__Aorta Morphogenesis (GO:0035909)	0.487075	2.10808	0.00255754	0.0499862	0.752	7/15	8.54%	ADAMTS9;PDGFRB;TBX2;DLL4;TGFBR2;LRP1;JAG1	Oligo
166	KEGG_2021_Human__JAK-STAT signaling pathway	0.25717	2.10308	0	0.0507025	0.763	39/114	17.28%	BCL2;CDKN1A;IL2RA;IL13;PDGFRB;IFNG;IL3RA;IL15RA;EGFR;GFAP;IFNA6;CTF1;JAK3;IL10RA;CNTFR;IFNA2;IL15;IL12A;CSF2RA;SOCS3;IL10RB;PRLR;IL6R;IL4R;EGF;IL2RB;IL5RA;IRF9;IL11RA;IL20RA;PIK3CD;STAT5A;IL19;GHR;IL13RA1;IL12RB2;MPL;AOX1;STAT2	Oligo
167	WikiPathway_2023_Human__Selective Expression Of Chemokine Receptors During T Cell Polarization WP4494	0.476397	2.10204	0.00268817	0.0496683	0.767	10/17	15.82%	TGFB3;CCR4;IFNG;CD4;CCR3;IL12A;IL4R;IL18R1;TGFB2;IL12RB2	Oligo
168	GO_Biological_Process_2023__Mitochondrial Respiratory Chain Complex Assembly (GO:0033108)	-0.324247	-2.0965	0	0.0114642	0.746	54/87	42.92%	SCO2;NDUFC2;NDUFB11;COA3;NDUFA11;NDUFB10;PET100;UQCC3;NDUFB8;NDUFAF3;COX14;NDUFA13;SDHAF1;NDUFB2;PET117;NDUFAB1;NDUFB7;NDUFB3;NDUFS5;NDUFA2;NDUFB5;NDUFS7;UQCRFS1;NDUFS3;NDUFS8;NDUFA1;DMAC1;COX16;NDUFA3;NDUFA6;SURF1;BCS1L;NDUFB9;NDUFAF8;NDUFB1;NDUFA8;NDUFB4;TMEM223;NDUFC1;TMEM126A;COA8;TMEM186;ECSIT;DMAC2;COX17;CHCHD4;NDUFS2;NDUFAF4;UQCC2;SDHAF2;NDUFAF1;STMP1;NDUFB6;NDUFA5	Oligo
169	GO_Biological_Process_2023__Glycolytic Process (GO:0006096)	-0.446762	-2.0891	0.00622084	0.0122403	0.77	23/27	41.01%	HKDC1;ENO4;PKLR;PFKM;GAPDHS;ENO3;GAPDH;TPI1;ALDOC;HK1;GCK;LDHA;PGAM2;UCP2;ENO2;ALDOB;PGAM1;PGK1;GPI;ENO1;PFKL;PKM;PFKFB2	Oligo
170	GO_Biological_Process_2023__ATP Biosynthetic Process (GO:0006754)	-0.477022	-2.08559	0.00301659	0.0126254	0.78	21/24	43.06%	ATP5MC1;ATP5MC3;ATP5F1D;ATP5PO;ATP5MF;ATP5MJ;ATP5PF;ATP5ME;ATP5PD;TGFB1;ATP5MK;ALDOA;ATP5F1B;ATP5F1E;SLC25A13;PRKAG2;ATP5MG;ATP5MC2;ATP5PB;ATP5F1A;VPS9D1	Oligo
171	KEGG_2021_Human__Aminoacyl-tRNA biosynthesis	0.338808	2.085	0	0.0549085	0.813	44/44	66.21%	VARS2;SARS2;AARS2;MTFMT;TARS2;MARS1;EARS2;YARS1;DARS2;KARS1;SEPSECS;CARS1;DARS1;QRSL1;RARS1;IARS1;WARS2;CARS2;FARSB;HARS1;LARS2;NARS2;PSTK;TARS3;YARS2;RARS2;LARS1;IARS2;EPRS1;GARS1;SARS1;FARS2;TARS1;GATB;AARS1;WARS1;GATC;HARS2;NARS1;MARS2;QARS1;VARS1;FARSA;PARS2	Oligo
172	GO_Biological_Process_2023__Receptor Signaling Pathway Via STAT (GO:0097696)	0.405338	2.0827	0.00568182	0.0543843	0.816	20/24	39.30%	IFNG;JAK3;CSF2RA;MYO1C;STAT5A;GHR;STAT2;TYK2;PKD1;IFNAR2;STAT3;JAK1;STAT5B;STAT1;SOCS6;STAMBP;IFNAR1;PIAS1;JAK2;PKD2	Oligo
173	GO_Biological_Process_2023__Excitatory Postsynaptic Potential (GO:0060079)	-0.533469	-2.08209	0.00155039	0.0128303	0.788	13/17	31.17%	NPAS4;GRIN1;NPFF;MEF2C;GRIN2B;FOXM1;GRID2;LRRK2;GRIN2C;GRIN2A;MAPK8IP2;GRIN2D;ARRB2	Oligo
174	GO_Molecular_Function_2023__Serine-Type Peptidase Activity (GO:0008236)	-0.316473	-2.08089	0	0.0128591	0.792	51/91	28.66%	PRTN3;PRSS16;MMP2;PCSK1;PRSS3;MASP1;CNTN1;MMP19;CEL;C1RL;KLK7;OVCH2;CTRB2;F2;PRSS12;CTRL;MASP2;DPP4;KLK14;KLK10;CTSV;PROC;PCSK4;PRSS36;CTSH;ST14;F10;GZMA;CFD;APEH;MMP14;TLL1;F12;PLG;PCSK2;SEC11C;RHBDL1;CFB;KLK5;KLK6;F7;TMPRSS2;HTRA2;ADAM8;C1R;PRSS48;CTSS;LPA;CELA2B;PRSS53;PARL	Oligo
175	GO_Biological_Process_2023__Cellular Response To Cadmium Ion (GO:0071276)	0.428663	2.07904	0.00284091	0.0544887	0.824	9/21	13.54%	MT1A;MT1X;MT1H;EGFR;MT1G;MT1E;MT1F;NCF1;SLC11A1	Oligo
176	GO_Molecular_Function_2023__Transmitter-Gated Monoatomic Ion Channel Activity Involved In Regulation Of Postsynaptic Membrane Potential (GO:1904315)	-0.436354	-2.07811	0	0.013073	0.804	20/30	27.65%	CHRNG;CHRNB2;CHRNA2;GRIN2B;GRIN3B;GRIK1;GRID2;CHRNA4;GABRA2;GRIN3A;GRIN2C;GRIA1;GRIK5;GRIN2A;CHRNA10;CHRNB3;CHRNA5;CHRNB1;GRIN2D;GRIA3	Oligo
177	GO_Biological_Process_2023__Carbohydrate Catabolic Process (GO:0016052)	-0.402389	-2.07761	0.00152905	0.0130178	0.805	29/37	41.01%	GBA3;HKDC1;ENO4;PKLR;PFKM;NEU4;GAPDHS;ENO3;GAPDH;TPI1;ALDOC;NEU1;HK1;GCK;LDHA;PGAM2;UCP2;ENO2;ALDOB;NAGA;PGAM1;PGK1;GPI;ENO1;MAN2C1;PFKL;PKM;MANBA;PFKFB2	Oligo
178	GO_Biological_Process_2023__Toll-Like Receptor Signaling Pathway (GO:0002224)	0.384361	2.07752	0	0.0538915	0.829	11/28	10.27%	TLR2;TLR4;TLR3;PLCG2;TLR10;TLR6;LY96;IRAK3;TLR1;TICAM1;BTK	Oligo
179	GO_Biological_Process_2023__Chemical Synaptic Transmission, Postsynaptic (GO:0099565)	-0.471522	-2.07707	0	0.0129634	0.806	16/24	27.38%	NPAS4;GRIN1;NPFF;MEF2C;INSYN2A;GRIN2B;FOXM1;GRID2;INSYN1;CHRNA4;LRRK2;GRIN2C;GRIN2A;GLRA1;MAPK8IP2;GRIN2D	Oligo
180	GO_Biological_Process_2023__Negative Regulation Of Interleukin-6 Production (GO:0032715)	0.405468	2.07519	0.00286533	0.0535571	0.836	14/25	18.46%	TLR4;ZC3H12A;ELF4;GHRL;TNFAIP3;BPI;IRAK3;C5AR2;NLRC3;CD84;NMBR;GAS6;PTPN22;C1QTNF3	Oligo
181	WikiPathway_2023_Human__Pluripotent Stem Cell Differentiation Pathway WP2848	-0.405731	-2.06796	0	0.0140119	0.828	19/37	17.40%	KIT;NOG;PDGFB;WNT5A;IGF1;VEGFA;WNT2;DKK1;CNTF;NT5E;FGF10;TNFSF11;LEFTY1;KITLG;BMP4;NODAL;FLT3LG;SHH;WNT7B	Oligo
182	KEGG_2021_Human__Amyotrophic lateral sclerosis	-0.244441	-2.06487	0	0.0142647	0.836	148/329	34.72%	COX8C;MAPK12;COX7A1;MAPK11;COX4I2;NEFH;GPX3;ATP5MC1;NDUFC2;NDUFB11;NDUFA4;TUBB2A;COX8A;TUBA4A;COX6B2;COX6A1;BID;NDUFA11;ATP5MC3;PSMB6;NDUFB10;UQCR10;ATP5F1D;GRIN1;COX7A2;NEFM;CYC1;NDUFB8;CHCHD10;NEFL;TUBB2B;NDUFA13;DNAH5;TUBB4B;ATP5PO;COX5B;NDUFB2;ANXA11;TUBA3D;GRIN2B;NXF3;NOS2;DCTN3;TUBA1B;UQCR11;TNFRSF1B;COX4I1;COX7C;TUBB3;HAP1;NDUFAB1;SDHD;COX6C;ATP5PF;NDUFB7;ALYREF;NDUFA4L2;DNAL4;GPX2;NDUFA7;…	Oligo
183	GO_Biological_Process_2023__Regulation Of Dopamine Secretion (GO:0014059)	-0.486764	-2.06417	0	0.0143019	0.84	12/21	19.83%	SYT6;SYT5;CHRNB2;SYT13;SYT4;SYT1;SYT10;KCNA2;FGF20;SYT7;SYT17;SYT3	Oligo
184	WikiPathway_2023_Human__Heart Development WP1591	-0.429675	-2.06409	0	0.0142202	0.84	13/31	11.92%	HEY1;VEGFC;NFATC4;VEGFA;BHLHE40;NFATC1;MEF2C;FGF10;FOXC2;SMYD1;FOXC1;GATA4;BMP4	Oligo
185	KEGG_2021_Human__Thermogenesis	-0.266107	-2.06157	0	0.0145185	0.846	97/211	32.39%	COX8C;MAPK12;COX7A1;UCP1;MAPK11;COX4I2;ATP5MC1;NDUFC2;NDUFB11;NPPA;NDUFA4;COX8A;CNR1;COA3;COX6B2;COX6A1;NDUFA11;ATP5MC3;NDUFB10;UQCR10;ACTL6B;ATP5F1D;COX7A2;CYC1;NDUFB8;CREB3L3;NDUFAF3;COX14;NDUFA13;ADCY7;CREB3L1;ATP5PO;COX5B;NDUFB2;UQCR11;ADCY1;ATP5MF;COX4I1;COX7C;NDUFAB1;SDHD;COX6C;ATP5PF;NDUFB7;NDUFA4L2;PRDM16;ACSL5;ZNF516;NDUFA7;COX7B2;NDUFB3;NDUFS5;NDUFA2;NDUFB5;ATP5ME;NDUFS7;COX6B1;NDUFC2-K…	Oligo
186	GO_Biological_Process_2023__Neuron Projection Guidance (GO:0097485)	-0.294245	-2.06063	0	0.0144948	0.847	53/121	24.28%	SEMA3G;ARHGEF25;LRTM2;EPHB3;CXCL12;EFNA4;WNT5A;CNTN1;BDNF;EFNB1;SEMA5A;EPHB6;IGSF9;EFNB3;RET;NRXN1;LGI1;EMB;EPHB2;DPYSL5;EFNA3;LRTM1;NOTCH3;TUBB3;DCC;TNR;EPHA4;CNTN4;LGR6;NRCAM;PTPRO;L1CAM;PLEKHG4;PLEKHG4B;NELL1;SHH;ROBO2;NIBAN2;NELL2;SEMA3F;EPHA6;SLIT1;EPHA7;EFNA5;EPHA5;PLXNA3;CNTN5;SEMA6C;SCN1B;LYPLA2;EFNA2;SEMA3A;DSCAM	Oligo
187	GO_Biological_Process_2023__Organic Cation Transport (GO:0015695)	0.3854	2.05956	0.00311526	0.0584359	0.859	16/28	23.57%	SLC22A3;SLC6A12;SLC22A16;SLC22A1;SLC22A5;SLC22A2;SLC44A5;SLC47A1;SLC44A2;SLC47A2;PDZK1;SLC18B1;SLC22A4;SLC29A3;SLC19A2;SLC25A42	Oligo
188	GO_Molecular_Function_2023__Ligand-Gated Monoatomic Ion Channel Activity (GO:0015276)	-0.493143	-2.05714	0.00161551	0.0148127	0.86	15/20	27.65%	CHRNB2;GRIN1;GRIN2B;GRIN3B;CHRNA4;GABRA2;GABRA5;ZACN;GRIA1;GRIK5;CNGB1;GLRA1;CHRNA5;CHRNB1;GRIA3	Oligo
189	GO_Biological_Process_2023__Regulation Of Membrane Depolarization (GO:0003254)	-0.495416	-2.05672	0	0.0147553	0.86	15/19	32.51%	HCN3;SCN3B;CAV3;NEDD4L;HCN2;PTPN3;SCN2B;HCN1;LRRK2;RANGRF;SCN10A;SCN1B;SCN5A;SMAD7;FHL1	Oligo
190	GO_Biological_Process_2023__Positive Regulation Of Developmental Growth (GO:0048639)	-0.374328	-2.05507	0.00294118	0.0148703	0.864	23/43	27.87%	BDNF;CPNE6;UNC13A;SYT4;NGF;NEDD4L;ISLR2;SYT1;TWF2;CPNE5;L1CAM;NTN1;SYT17;PLCB1;PPIB;SYT3;RIMS2;CPNE9;ZP3;SYT2;LIMK1;RIMS1;AGRN	Oligo
191	GO_Biological_Process_2023__Muscle Cell Development (GO:0055001)	-0.446162	-2.05426	0	0.0149079	0.867	15/28	21.98%	ACTN2;SGCZ;TCAP;ALPK2;MYH6;RAMP2;IGF1;VEGFA;CAV3;ASB2;HES1;SLC8A1;TTN;ENG;EFEMP2	Oligo
192	GO_Molecular_Function_2023__Sodium Channel Regulator Activity (GO:0017080)	-0.427143	-2.04944	0	0.0155152	0.88	18/31	23.51%	FXYD2;FXYD6;SCN3B;FXYD4;FXYD3;CAV3;YWHAH;NEDD4L;PTPN3;SCN4B;RSC1A1;FXYD1;SCN2B;FXYD7;RANGRF;FGF13;FGF12;SCN1B	Oligo
193	GO_Biological_Process_2023__Positive Regulation Of G Protein-Coupled Receptor Signaling Pathway (GO:0045745)	-0.519216	-2.0488	0.00156006	0.0154796	0.881	15/17	37.61%	GRP;CHGA;F2;KLK14;MRAP2;NECAB2;GPER1;PDE6G;KLK5;KLK6;PHB1;PRMT5;PRKCA;LRPAP1;GSK3A	Oligo
194	GO_Biological_Process_2023__Calcium-Dependent Cell-Cell Adhesion Via Plasma Membrane Cell Adhesion Molecules (GO:0016339)	0.356993	2.04063	0.00287356	0.0662589	0.888	22/36	23.64%	CDH13;SELL;CDH3;CDH23;CDH5;PCDHGB4;SELP;CDH17;CDHR3;PCDHB6;PCDHB5;PCDHGC3;PCDHB9;NLGN1;PCDHB2;PCDHB10;PCDHB13;CDH11;PCDHB3;CDH26;PCDHB14;PCDHB16	Oligo
195	GO_Molecular_Function_2023__Transmembrane Receptor Protein Tyrosine Kinase Activity (GO:0004714)	0.314931	2.03959	0	0.065364	0.892	21/47	16.62%	ROR1;FGFR3;ROS1;EPHA3;PDGFRB;EPHA2;EFEMP1;EGFR;FGFR4;FGFRL1;EPHB4;CSF1R;AXL;MERTK;FGFR1;NTRK2;ROR2;LTK;MST1R;ERBB2;MET	Oligo
196	MSigDB_Hallmark_2020__Allograft Rejection	0.238067	2.03938	0	0.0640263	0.892	53/149	17.50%	HLA-DOB;CCL2;TLR2;IL2RA;IL13;IFNG;HLA-DQA1;CD4;IRF4;INHBA;BCAT1;CDKN2A;ICAM1;ELF4;TLR3;EGFR;ITGB2;RPL3L;ZAP70;LCK;TLR6;ITK;PTPRC;IL15;IL12A;CD40;CD96;TLR1;TAP1;FAS;LCP2;IL4R;STAB1;CD8A;IL2RB;HLA-E;CSF1;SRGN;TIMP1;HLA-DMA;ITGAL;KLRD1;SPI1;IL16;TGFB2;FYB1;FLNA;ETS1;C2;WAS;CD247;TAP2;ICOSLG	Oligo
197	GO_Biological_Process_2023__Positive Regulation Of Transcription By RNA Polymerase III (GO:0045945)	0.487109	2.03921	0	0.0627667	0.892	15/15	51.33%	MYBBP1A;DDX21;ZNF143;BAZ1B;ICE1;ZC3H8;CHD8;RPTOR;MTOR;ICE2;DEK;SMARCA5;SF3B1;ELL;ERCC6	Oligo
198	GO_Biological_Process_2023__Striated Muscle Contraction (GO:0006941)	-0.363407	-2.03872	0	0.0166995	0.903	27/48	26.48%	SMPX;TNNI3;TCAP;TNNT2;MYH6;SCN3B;CSRP3;MYH8;STAC;RCSD1;KLHL41;SCN4B;STAC2;SLC8A1;MYBPC3;SCN2B;KCNQ1;TTN;JSRP1;LMOD3;STAC3;SCN1B;DTNA;SCN5A;PGAM2;KCNH2;TNNT1	Oligo
199	GO_Biological_Process_2023__Positive Regulation Of T Cell Migration (GO:2000406)	-0.508411	-2.03289	0.00163934	0.0175777	0.913	9/18	18.26%	PYCARD;TMEM102;CXCL12;WNT5A;TNFRSF14;DOCK8;CXCL13;CCL5;AIF1	Oligo
200	WikiPathway_2023_Human__Pancreatic Cancer Subtypes WP5390	-0.477148	-2.03075	0.00313972	0.0178892	0.917	11/20	12.20%	LY6D;KRT17;ANXA10;KRT20;KRT15;S100A2;FAM83A;TSPAN8;TNS4;DHRS9;CTSV	Oligo
201	GO_Biological_Process_2023__Negative Regulation Of Peptide Hormone Secretion (GO:0090278)	-0.51889	-2.02936	0.00158479	0.0179723	0.921	11/17	23.16%	CRH;KCNJ11;CHGA;INHBB;CCN3;FFAR4;KCNB1;CRHBP;SIRT4;SFRP1;IRS1	Oligo
202	WikiPathway_2023_Human__Prostaglandin And Leukotriene Metabolism In Senescence WP5122	-0.423683	-2.02813	0.00472441	0.0180603	0.923	16/28	24.01%	ALOX12;MAPK11;PTGS2;PTGER4;IGFBP5;ALOX5AP;PTGDS;PRXL2B;ALOX5;PTGS1;PLCB1;PTGER1;PLA2G4A;HRAS;PTGIS;PTGER3	Oligo
203	GO_Biological_Process_2023__Development Of Primary Male Sexual Characteristics (GO:0046546)	-0.414479	-2.02235	0.0015456	0.0189131	0.929	19/33	23.04%	KIT;SIX4;WNT5A;BIK;SOX15;WNT4;ADAM29;GATA1;ADAM2;FSHR;AKR1C3;FGF9;KITLG;GATA4;MEA1;DNAAF11;LHFPL2;ADAM21;ADAM20	Oligo
204	GO_Biological_Process_2023__Nucleocytoplasmic Transport (GO:0006913)	0.308321	2.01314	0.00338983	0.0730116	0.931	46/48	60.50%	CDAN1;GLE1;MALT1;NUP43;NUP188;HTATIP2;NUP107;SEC13;NUP88;NUP35;NUP85;ATXN1;NEMF;NUP205;NUP54;NUP98;NUP160;NDC1;NUP58;NUP155;NUP214;NUP133;XPO1;AHCTF1;BACH2;NUP153;TPR;RSRC1;POM121;RANBP2;NUP50;NUP93;NUP42;LSG1;NPM1;NUP37;RAE1;ANP32A;SEH1L;UBE2I;NUP62;NUP210;HNRNPA1;CDKN1B;RBM15B;RANGAP1	Oligo
205	GO_Biological_Process_2023__Response To Cadmium Ion (GO:0046686)	0.433056	2.00987	0.00289017	0.0731164	0.937	7/19	7.25%	MT1A;MT1X;MT1H;EGFR;MT1G;MT1E;MT1F	Oligo
206	GO_Biological_Process_2023__Positive Regulation Of Lymphocyte Proliferation (GO:0050671)	-0.347392	-2.00853	0.00145138	0.0213006	0.951	26/54	21.04%	CD70;CD86;IL1B;GPR183;IL23R;CHRNB2;IL23A;VCAM1;MEF2C;TNFRSF4;SASH3;FGF10;PNP;EPHB2;CD274;NCKAP1L;HLA-DPA1;CD74;ANXA1;CCL5;CCDC88B;CD81;IL7;CD276;PDCD1LG2;ZP3	Oligo
207	GO_Cellular_Component_2023__Organelle Inner Membrane (GO:0019866)	-0.233897	-2.00832	0	0.0212004	0.951	204/376	42.36%	UCP1;SCO2;CKMT1A;PTGS2;ATP5MC1;NDUFC2;ALAS2;NDUFB11;NDUFA4;COX8A;SLC25A5;COA3;COX6A1;SDSL;NDUFA11;MGARP;MRPL54;ATP5MC3;NDUFB10;UQCR10;GADD45GIP1;ATP5F1D;UQCC3;CYC1;NDUFB8;AIFM3;SLC30A2;NDUFAF3;TIMM10;MICOS13;IFI27;NDUFA13;TMEM160;ATP5PO;COX5B;NDUFB2;MRPS28;DPY19L2;MRPL40;SLC25A4;MRPL12;AURKAIP1;MTLN;UQCR11;MRPS6;ATP5MF;COX4I1;COX7C;TIMM13;SHMT2;SLC25A22;NDUFAB1;ATP5MJ;SDHD;MRPL55;COX6C;ATP5PF;NDU…	Oligo
208	GO_Cellular_Component_2023__Collagen-Containing Extracellular Matrix (GO:0062023)	-0.239547	-2.00644	0	0.0213949	0.954	143/310	26.70%	PRTN3;TINAG;LGALS1;COL18A1;MMP2;CBLN4;ANGPTL6;MGP;S100A4;HRNR;PDGFB;FIBCD1;PODN;THBS2;CXCL12;WNT5A;GDF10;NPPA;COL6A6;LUM;CNTN1;FREM3;VTN;PRG4;COL3A1;ITIH1;COL1A2;SULF1;RARRES2;CD151;SFRP2;CTHRC1;COL20A1;CBLN1;FGL1;WNT2;FCN1;ANGPTL1;ANGPTL7;COL10A1;EGFL7;FGF10;AHSG;TINAGL1;SERPINF1;CSPG4;COL8A1;COL6A2;F2;C1QC;C1QA;FMOD;MUC17;ITIH4;MMRN2;OGN;LOXL4;S100A10;ASPN;ANXA11;ANGPTL4;S100A6;TGFBI;ITIH2;FGL2…	Oligo
209	GO_Biological_Process_2023__Fat-Soluble Vitamin Metabolic Process (GO:0006775)	0.434054	2.00612	0.00550964	0.0734831	0.94	9/20	14.64%	CYP27B1;NPC1L1;CYP11A1;LRAT;CYP4F12;RLBP1;LRP2;ALDH1A2;NQO1	Oligo
210	WikiPathway_2023_Human__Hair Follicle Development Cytodifferentiation Part 3 Of 3 WP2840	-0.334103	-2.00547	0.00135685	0.0215111	0.955	31/66	22.57%	EGR2;S100A4;SPINK6;WNT5A;KRT15;IGF1;NFATC1;DKK1;KLK7;FOSB;FOS;IGFBP5;LHX2;FOXQ1;TP63;KLK14;KITLG;BMP4;WIF1;FZD1;ADAMTS20;GPRC5D;SPINK5;CCN2;LEF1;DKK3;KLK5;BCL11B;CD34;KLK6;SFRP1	Oligo
211	GO_Biological_Process_2023__Cellular Response To Calcium Ion (GO:0071277)	-0.323176	-2.00395	0	0.0216549	0.955	30/66	24.89%	SYT6;SYT5;ITPKA;WNT5A;RASGRP2;NEUROD2;CPNE6;CHP2;SYT13;MEF2C;SYT4;GUCA1A;DPEP1;AKR1C3;ALOX5AP;SYT1;ADCY1;SYT10;CPNE5;CPNE7;SYT7;DMTN;RASA4;SYT17;SYT3;CPNE9;CRHBP;SCN5A;CPNE8;SYT2	Oligo
212	GO_Cellular_Component_2023__Dense Core Granule (GO:0031045)	-0.525918	-2.00351	0.00168634	0.0215895	0.957	11/15	27.99%	NPY;SYT5;SLC6A2;PDYN;SYT4;CHGA;BAIAP3;SYT1;CRHBP;SYT2;MYRIP	Oligo
213	WikiPathway_2023_Human__Sudden Infant Death Syndrome SIDS Susceptibility Pathways WP706	-0.281375	-2.0011	0	0.0218856	0.96	50/134	20.28%	SST;TAC1;ADCYAP1;ASCL1;EGR1;ATP1A3;HES5;KCNJ8;HTR1A;IL1B;SCN3B;VEGFA;DDC;BDNF;DLX2;CHRNB2;BHLHE40;SSTR1;GRIN1;HTR2A;GABRA1;MEF2C;CAV3;CHRM2;RET;VIPR1;VIPR2;THRB;NGF;MYB;YWHAH;TACR1;MAOA;SLC25A4;SNAP25;CEBPB;SCN4B;FOXM1;HES1;SSTR2;MAZ;CHRNA4;TPH2;PAH;GAPDH;KCNQ1;MAP2;PPARGC1B;PRKAR1B;SLC6A4	Oligo
214	GO_Biological_Process_2023__Vascular Transport (GO:0010232)	0.262772	2.00029	0	0.0749449	0.948	32/79	17.96%	SLC38A1;SLC1A5;ATP1A4;SLC22A3;SLCO1C1;ABCC4;LRP1;SLCO2B1;SLC22A1;SLC6A20;SLC22A5;SLC8A2;ATP1A2;SLC28A2;SLC38A5;SLC22A2;SLC29A1;AGER;SLC4A4;SLC7A2;ABCG2;LRP2;ABCC3;ABCB1;SLC6A6;ATP1B2;ABCC2;SLC7A8;SLC15A2;MFSD2A;LRP3;SLC6A9	Oligo
215	GO_Biological_Process_2023__Gonad Development (GO:0008406)	-0.393629	-1.99993	0.00152672	0.0219164	0.962	16/37	11.90%	KIT;SIX4;WNT5A;BIK;SOX15;WNT4;BASP1;ADAM29;GATA1;ADAM2;FSHR;AKR1C3;FGF9;KITLG;NR2F2;GATA4	Oligo
216	KEGG_2021_Human__cAMP signaling pathway	-0.263107	-1.99212	0	0.0233322	0.968	69/185	21.65%	SST;NPY;VIP;POMC;ADCYAP1;DRD5;FXYD2;TNNI3;ATP1A3;EDN3;DRD1;HTR1A;NPPA;RRAS2;BDNF;HTR1B;CALM3;NFATC1;SSTR1;RAC3;GRIN1;F2R;CHRM1;TSHR;VAV1;CREB3L3;CHRM2;FOS;ATP2B2;GIPR;CACNA1S;VIPR2;ADCY7;CREB3L1;FSHR;HCN2;GRIN2B;CAMK4;PLN;CACNA1F;ADCY1;GRIN3B;PPP1R1B;MYL9;ADRB2;PDE4A;SSTR2;RRAS;GABBR2;CAMK2B;PDE3A;RAC2;NPY1R;ATP2A3;CALML4;FXYD1;HTR1F;CNGB3;PIK3R3;CAMK2A;GRIN3A;GRIN2C;HTR1D;GRIA1;CNGB1;GRIN2A;HTR4…	Oligo
217	KEGG_2021_Human__Glutamatergic synapse	-0.293164	-1.99124	0	0.0233931	0.969	69/108	40.68%	GNG3;SLC17A6;PLCB2;GNG13;GNG10;GRM2;GLS2;SLC1A6;PRKCG;GRIN1;SLC17A7;ADCY7;GRIN2B;GNG2;ADCY1;GRIN3B;GRIK1;GNG4;SLC17A8;PLCB4;GRM5;GNG11;GNGT1;GRM4;KCNJ3;GRIN3A;PLCB1;GRIN2C;GRIA1;GRIK5;DLGAP1;GNB2;GRIN2A;SLC1A1;ADCY2;JMJD7-PLA2G4B;PLA2G4A;GLUL;PLA2G4E;GRM6;GRM8;GRM1;HOMER3;SLC38A3;SLC1A2;PPP3R1;GRIN2D;GRIA3;PLA2G4C;ITPR1;CACNA1D;CACNA1A;GRK2;CACNA1C;GNG7;PRKCA;DLG4;GNB5;GRIA4;MAPK3;SLC38A2;GNB4;PL…	Oligo
218	WikiPathway_2023_Human__Serotonin And Anxiety WP3947	-0.507108	-1.99047	0.00164745	0.0234366	0.969	10/17	17.98%	CRH;POMC;HTR1A;HTR2A;GABRA1;ARC;FOS;ADRA1A;CAMK2B;PLEK	Oligo
219	KEGG_2021_Human__Cell adhesion molecules	0.245602	1.98887	0	0.079468	0.958	40/121	13.08%	CD99;CLDN14;HLA-DOB;SELPLG;CLDN16;HLA-DQA1;CD4;SPN;ICAM1;MPZ;ITGAM;ITGB2;HLA-F;SELL;CD6;PTPRC;CDH3;CD40;SIGLEC1;SDC4;CLDN9;PTPRM;CLDN18;CLDN2;CLDN1;VSIR;CDH5;CD8A;MPZL1;HLA-E;CD58;SELP;SELE;NLGN4Y;HLA-DMA;ITGAL;VCAN;LRRC4;ITGA9;CNTNAP2	Oligo
220	GO_Biological_Process_2023__RNA Polyadenylation (GO:0043631)	0.38191	1.98838	0.00931677	0.0783793	0.959	24/25	55.19%	PAPOLB;TUT1;CPSF1;SYMPK;CSTF3;PABPC1;CPSF3;MTPAP;PCF11;CPSF2;WDR33;ZCCHC7;TENT2;SCAF8;PAPOLG;PNPT1;CDC73;PEX2;TENT4B;GRSF1;PAPOLA;APP;LEO1;SSU72	Oligo
221	KEGG_2021_Human__Taste transduction	-0.325401	-1.98564	0.00291545	0.0242458	0.972	33/65	23.78%	GNAT3;TAS2R40;PLCB2;GNG13;HTR1A;HTR1B;GABRA1;TAS2R10;SCN2A;GABRA4;SCN3A;GABRA3;HTR3C;CHRM3;GABBR2;PLCB4;TAS2R39;GABRA2;GABRA5;GRM4;ENTPD2;HTR1F;PKD2L1;PLCB1;TAS2R43;PDE1A;PDE1B;HTR1D;TAS1R1;TAS2R5;TAS2R50;HTR3E;GRM1	Oligo
222	KEGG_2021_Human__Synaptic vesicle cycle	-0.324634	-1.98562	0.00142653	0.0241015	0.972	35/70	30.48%	SLC17A6;ATP6V0C;SLC18A2;SLC6A2;CPLX1;RAB3A;SLC32A1;TCIRG1;ATP6V0B;SLC1A6;ATP6V1F;SLC17A7;UNC13A;DNM1;STX1A;SYT1;SNAP25;CPLX2;ATP6V0D2;SLC17A8;ATP6V1G2;AP2S1;CPLX4;SLC6A7;SLC6A11;SLC6A4;SLC1A1;UNC13C;SLC1A2;RIMS1;SLC6A13;VAMP2;STX1B;AP2M1;CACNA1A	Oligo
223	KEGG_2021_Human__ECM-receptor interaction	0.267415	1.98379	0	0.0793667	0.961	29/75	15.80%	ITGB4;FREM2;CD44;TNN;TNXB;TNC;ITGA5;THBS4;LAMC2;GP1BA;ITGA11;ITGA10;LAMC1;SDC4;ITGB3;COL6A1;THBS1;VWF;LAMA5;COL4A1;GP6;LAMA3;ITGA9;LAMB2;HMMR;COL4A6;ITGA2B;COL6A3;ITGB8	Oligo
224	GO_Molecular_Function_2023__Ion Channel Inhibitor Activity (GO:0008200)	-0.399802	-1.98259	0	0.0247436	0.975	20/33	34.81%	FKBP1B;TNNI3;KCNV1;PHPT1;SCN3B;CAV3;KCNMB2;NEDD4L;STX1A;RSC1A1;SCN1B;WNK4;ITPR1;RACK1;SLC30A1;FKBP1A;CALM2;PACSIN3;CALM1;CFTR	Oligo
225	GO_Biological_Process_2023__Regulation Of Endothelial Cell Apoptotic Process (GO:2000351)	0.3477	1.9825	0.00315457	0.0788234	0.962	12/32	9.74%	CCL2;ANGPT1;IL13;CD160;ICAM1;GATA2;CD40;TNFAIP3;SERPINE1;THBS1;CDH5;MAPK7	Oligo
226	GO_Biological_Process_2023__Nuclear Transport (GO:0051169)	0.328	1.98128	0	0.0779809	0.962	36/37	60.50%	GLE1;NUP43;NUP188;NUP107;SEC13;NUP88;NUP35;NUP85;NUP205;NUP54;NUP98;NUP160;NDC1;NUP58;NUP155;NUP214;NUP133;XPO1;AHCTF1;NUP153;TPR;RSRC1;POM121;RANBP2;NUP50;NUP93;NUP42;NPM1;NUP37;RAE1;ANP32A;SEH1L;NUP62;NUP210;RBM15B;RANGAP1	Oligo
227	GO_Biological_Process_2023__Glutamate Receptor Signaling Pathway (GO:0007215)	-0.39633	-1.98078	0.0060698	0.02504	0.978	20/35	27.65%	TRPM1;GRM2;GRIN1;GRIN2B;GRIN3B;GRIK1;GRID2;GRM5;GRM4;KCNB1;GRIN3A;PLCB1;GRIN2C;GRIN2A;GRM6;GRM8;GRM1;HOMER3;GRIN2D;GRIA3	Oligo
228	GO_Biological_Process_2023__Receptor Signaling Pathway Via JAK-STAT (GO:0007259)	0.368111	1.97944	0.00290698	0.0777139	0.965	18/27	34.42%	IFNG;JAK3;IL15;CSF2RA;MYO1C;STAT5A;GHR;STAT2;TYK2;PKD1;IFNAR2;STAT3;JAK1;STAT5B;STAT1;SOCS6;STAMBP;IFNAR1	Oligo
229	GO_Biological_Process_2023__Toll-Like Receptor 4 Signaling Pathway (GO:0034142)	0.45538	1.97858	0.00759494	0.0769372	0.965	8/16	13.07%	MYD88;TLR4;TRIL;LGALS9;TICAM2;LY96;MYO1C;PIK3AP1	Oligo
230	GO_Biological_Process_2023__Actin Filament Bundle Assembly (GO:0051017)	-0.409948	-1.97788	0.00733138	0.0255931	0.979	22/32	35.64%	USH1C;PDXP;ESPNL;RHOD;LIMD2;MYO1B;ESPN;DMTN;BAIAP2;BAIAP2L1;AIF1;DPYSL3;ADD2;EZR;PAWR;HSP90B1;SHROOM2;PLS1;NEDD9;MICAL1;FSCN1;CORO1B	Oligo
231	GO_Cellular_Component_2023__Mitochondrial Proton-Transporting ATP Synthase Complex (GO:0005753)	-0.500968	-1.97725	0.00312012	0.0254152	0.979	15/17	40.93%	ATP5MC1;ATP5MC3;ATP5F1D;ATP5PO;ATP5MF;ATP5MJ;ATP5PF;ATP5ME;ATP5PD;ATP5MK;ATP5F1B;ATP5F1E;ATP5MG;ATP5MC2;ATP5PB	Oligo
232	GO_Cellular_Component_2023__Proton-Transporting ATP Synthase Complex (GO:0045259)	-0.500968	-1.97725	0.00312012	0.0254152	0.979	15/17	40.93%	ATP5MC1;ATP5MC3;ATP5F1D;ATP5PO;ATP5MF;ATP5MJ;ATP5PF;ATP5ME;ATP5PD;ATP5MK;ATP5F1B;ATP5F1E;ATP5MG;ATP5MC2;ATP5PB	Oligo
233	KEGG_2021_Human__GnRH secretion	-0.334799	-1.97615	0.00146413	0.0254983	0.98	39/60	40.47%	CACNA1H;TRPC5;PLCB2;KISS1R;HCN3;KCNJ11;PRKCG;CACNA1S;CACNA1G;KCNJ6;HCN2;CACNA1F;GABBR2;PLCB4;HCN1;PIK3R3;KCNJ3;CACNA1I;PLCB1;GPER1;TRPC4;SPP1;KCNJ5;HRAS;KCNN2;PIK3R2;ITPR1;CACNA1D;KCNN3;ARRB2;CACNA1C;PRKCA;GNRH1;MAP2K2;MAPK3;GABBR1;KCNJ9;AKT1;KRAS	Oligo
234	GO_Biological_Process_2023__Endothelial Cell Migration (GO:0043542)	-0.392988	-1.97255	0.00154799	0.0260204	0.985	18/35	21.23%	SOX18;PRSS3;CYP1B1;VEGFA;EGR3;S100A2;CEL;PTP4A3;CCN3;FSTL1;ID1;DPP4;PLXND1;RAB13;NELL1;TNFSF12;NR4A1;ADGRA2	Oligo
235	GO_Biological_Process_2023__Adenylate Cyclase-Activating G Protein-Coupled Receptor Signaling Pathway (GO:0007189)	-0.308859	-1.97252	0.00277778	0.0258778	0.985	40/84	21.34%	GPR3;VIP;ADCYAP1;DRD5;GPR26;PTHLH;DRD1;RAMP2;PTH1R;PTGER4;TSHR;ADRA1B;ADM5;CALCR;UTS2;GIPR;ADGRG5;ADCY7;ADRA2A;MC4R;RAMP3;ADGRD2;GNG2;ADCY1;ADRA1D;ADRB2;ADGRG7;ADGRE1;GPR65;ADGRB1;ADGRL2;PTGFR;TCP11;ADORA2B;PTGER1;ADGRE3;GPER1;ADGRF5;CALCRL;ADCY2	Oligo
236	GO_Biological_Process_2023__Chaperone-Mediated Protein Complex Assembly (GO:0051131)	-0.463982	-1.96379	0.00465116	0.0278117	0.989	18/21	44.51%	HSPA1A;HOPX;TMEM35A;THEG;PTGES3L;PFDN6;BBS12;HSP90AB1;PSMG3;BBS10;NDUFAF1;PTGES3;CCT2;PSMG1;LONP1;MKKS;HSPD1;HSP90AA1	Oligo
237	GO_Cellular_Component_2023__Synaptic Membrane (GO:0097060)	-0.401013	-1.96303	0.0015015	0.0278534	0.989	16/31	20.06%	SLITRK3;SHISA8;GRIN1;LRRTM1;ATP2B2;GRIN2B;SYDE2;FLRT3;ITGA3;TMEM240;RIMS4;GRIA1;SHISA9;GPER1;DAGLA;GRIN2A	Oligo
238	GO_Biological_Process_2023__Regulation Of Cytosolic Calcium Ion Concentration (GO:0051480)	-0.378378	-1.96225	0.00304414	0.027874	0.989	21/37	27.15%	FKBP1B;CAV1;TRPC5;CALB1;CALB2;WNT5A;FZD9;TMEM178A;TUNAR;CAV3;ATP2B2;F2;HCRTR2;PLN;CAV2;HCRTR1;GPER1;TRPC4;SLC35G1;TRPM2;TRPC3	Oligo
239	GO_Cellular_Component_2023__Lysosomal Lumen (GO:0043202)	-0.306363	-1.96153	0	0.0279046	0.989	54/80	41.91%	CBLIF;LUM;HSPA8;CEL;APOB;CSPG4;NCAN;FMOD;OGN;CTSV;CD74;BGN;NEU4;CSPG5;GPC4;GPC6;OMD;NEU1;CTSA;DCN;CTSF;SDC3;CTSS;GPC2;PRELP;CTSD;AGRN;ARSA;CHID1;SDC2;CTSL;IDUA;NPC2;CTSK;GLA;PPT2;TCN2;GALNS;NAGLU;SMPD1;GPC3;GBA1;ATP13A2;GM2A;HSPG2;CTSB;IDS;FUCA1;MANBA;PSAP;MAN2B2;LGMN;PPT1;TPP1	Oligo
240	GO_Molecular_Function_2023__aminoacyl-tRNA Ligase Activity (GO:0004812)	0.338663	1.96148	0.00655738	0.0849134	0.976	37/37	66.21%	SARS2;AARS2;TARS2;MARS1;EARS2;YARS1;DARS2;KARS1;CARS1;DARS1;RARS1;IARS1;WARS2;CARS2;FARSB;HARS1;LARS2;NARS2;TARS3;YARS2;RARS2;LARS1;IARS2;EPRS1;GARS1;SARS1;FARS2;TARS1;WARS1;HARS2;NARS1;LRRC47;MARS2;QARS1;VARS1;FARSA;PARS2	Oligo
241	GO_Biological_Process_2023__Negative Regulation Of Type II Interferon Production (GO:0032689)	0.394041	1.95894	0.00287356	0.0848635	0.976	10/23	9.91%	TLR4;INHA;ZC3H12A;INHBA;CR1;LILRB1;LGALS9;VSIR;LAPTM5;RARA	Oligo
242	GO_Biological_Process_2023__Regulation Of Monoatomic Ion Transport (GO:0043269)	-0.442111	-1.95848	0.00149477	0.0285088	0.991	14/24	22.78%	KCNJ8;HTR1A;KCNJ12;KCNJ11;KCNJ4;CHRM1;KCNJ6;NEDD4L;KCNJ3;CLDN10;KCNJ16;SCN10A;KCNJ13;KCNJ5	Oligo
243	WikiPathway_2023_Human__Synaptic Vesicle Pathway WP2267	-0.3493	-1.95835	0.00302572	0.0283776	0.991	26/48	30.65%	SLC17A6;SLC18A2;CPLX1;RAB3A;SLC32A1;SYN1;SLC17A7;UNC13A;SYN2;SLC25A4;DNM1;STX1A;SYT1;SNAP25;CPLX2;SLC17A8;AP2S1;SLC6A4;UNC13C;RIMS1;VAMP2;STX1B;PARK7;AP2M1;CACNA1A;SYP	Oligo
244	GO_Cellular_Component_2023__Intermediate Filament (GO:0005882)	-0.375912	-1.95824	0.0015674	0.0282783	0.991	14/39	8.95%	KRT17;KRT83;KRT5;KRT20;BFSP2;DSP;KRT81;KRT86;EVPL;INA;NEFM;NEFL;RTN2;KRT10	Oligo
245	GO_Biological_Process_2023__G Protein-Coupled Acetylcholine Receptor Signaling Pathway (GO:0007213)	-0.493335	-1.95708	0.00322581	0.0283968	0.995	13/17	34.16%	CHRM4;HRH3;CHRM1;RGS8;CHRM2;GNA15;CHRM3;PLCB1;RGS10;OPRM1;HRH4;GRK2;CDK5R1	Oligo
246	GO_Biological_Process_2023__Positive Regulation Of Calcium Ion Transmembrane Transport (GO:1904427)	-0.404359	-1.9555	0.00154799	0.0286694	0.995	18/31	30.67%	CAV1;P2RX5;THY1;DRD1;CASQ1;GRIN1;F2R;CALCR;F2;CX3CL1;RAMP3;GPER1;NPSR1;GRM6;PPP3R1;TRPC3;CEMIP;CACNB2	Oligo
247	GO_Biological_Process_2023__Monoatomic Anion Transmembrane Transport (GO:0098656)	-0.341359	-1.95405	0	0.0288593	0.995	29/53	28.18%	SLC12A5;GABRG3;APOL1;GABRA1;SLC5A1;GABRA4;SLC12A7;GABRA3;GABRG2;GLRA3;GABRB2;GABRG1;SLC5A5;ANO3;GABRA2;GABRA5;GLRB;SLC12A1;LRRC8E;ANO5;SLC1A1;GLRA2;GABRB3;SLC4A1;GLRA1;SLC5A6;ANO6;SLC12A8;ANO8	Oligo
248	GO_Biological_Process_2023__tRNA Aminoacylation For Protein Translation (GO:0006418)	0.338622	1.95328	0.00628931	0.0869368	0.978	35/35	66.21%	SARS2;AARS2;TARS2;MARS1;EARS2;YARS1;DARS2;KARS1;CARS1;DARS1;RARS1;IARS1;WARS2;CARS2;FARSB;HARS1;LARS2;NARS2;TARS3;RARS2;LARS1;IARS2;EPRS1;GARS1;SARS1;FARS2;TARS1;WARS1;HARS2;NARS1;MARS2;QARS1;VARS1;FARSA;PARS2	Oligo
249	GO_Biological_Process_2023__Positive Regulation Of Phagocytosis (GO:0050766)	0.311419	1.95274	0	0.0858125	0.978	20/45	16.08%	CCL2;FCER1G;IFNG;IL15RA;PLCG2;COLEC11;GATA2;PTPRC;IL15;RAB31;CLEC7A;IL2RB;COLEC10;APOA1;C3;MERTK;CYBA;SLC11A1;GAS6;C2	Oligo
250	GO_Biological_Process_2023__Organic Anion Transport (GO:0015711)	-0.306369	-1.9524	0.00276625	0.0290571	0.996	48/78	37.91%	CA4;SLCO1B1;SLCO6A1;SLCO4C1;SLC4A3;RHAG;SLC2A10;SLC22A7;SLC22A13;SLCO2A1;SLC22A6;SLC22A10;SLC25A4;SLC2A14;SLC22A25;SLC25A41;SLC22A24;SLC52A1;SLC22A9;SLC44A4;MGST1;LRRC8E;SLC35B2;SLC17A9;ABCC6;CPTP;SLC4A1;SLC4A10;SLC52A2;SLC26A5;SLC4A9;SLC26A6;MFSD10;SLC35A1;SLC2A3;SLC39A8;CYB5R1;SLC35A2;SLC2A6;SLC4A2;CYB5R2;SLC25A25;CFTR;SLC4A8;SLC25A19;SLC19A1;SLC25A23;CYB5RL	Oligo
251	GO_Biological_Process_2023__Modulation Of Excitatory Postsynaptic Potential (GO:0098815)	-0.406095	-1.94406	0.00152905	0.0310089	0.997	23/31	39.66%	WNT7A;CBLN1;GRIN1;NRXN1;TMEM108;GRIN2B;SLC8A3;LRRK2;GRIN2C;NETO1;RIMS2;GRIN2A;CUX2;RIMS1;GRIN2D;STX1B;RELN;NLGN4X;TMEM25;DLG4;CHRNA7;PRKCZ;SHANK3	Oligo
252	GO_Molecular_Function_2023__High Voltage-Gated Calcium Channel Activity (GO:0008331)	-0.443927	-1.94345	0.00156006	0.0310362	0.997	18/22	37.90%	CACNA1H;CACNB3;SCN2A;CACNA1S;CACNA1G;SCN1A;SCN3A;CACNA1F;CACNB1;CACNA1I;SCN10A;SCN5A;CACNB4;CACNA1D;CACNB2;CACNA1C;SCN8A;SCN11A	Oligo
253	GO_Molecular_Function_2023__Chloride Channel Activity (GO:0005254)	-0.334407	-1.94205	0.00149254	0.0312194	0.997	32/58	28.71%	SLC17A6;FXYD3;GABRG3;APOL1;GABRA1;SLC17A7;GABRA4;GABRA3;KCNT2;GABRG2;GLRA3;SLC17A8;GABRB2;GABRG1;ANO3;GABRA2;GABRA5;FXYD1;GLRB;CLIC1;OCA2;ANO5;GLRA2;GABRB3;GLRA1;CLCA1;CLCN7;CLDN4;TTYH3;ANO6;ANO8;SLC26A8	Oligo
254	GO_Biological_Process_2023__Mitochondrial Translation (GO:0032543)	-0.292362	-1.94068	0	0.0313813	0.997	71/98	52.78%	MRPL54;GADD45GIP1;MRPS28;MRPL40;MRPL12;MRPS6;MRPL55;MRPL17;MRPL34;NDUFA7;MRPS12;MRPS34;MRPL28;MRPL51;MRPL53;MRPS2;MRPL23;MRPS26;MRPS17;MRPL41;CHCHD1;MRPL36;MRPL21;MRPL14;MRPL49;MRPS7;MRPL57;TUFM;MTG1;MRPL38;MRPL24;MRPL27;MRPL2;MRPS15;MRPL4;MRPL18;MRPL9;MRPL11;MRPL58;MRPL52;MRPL43;MRPS33;MRPS18A;MRPS21;MRPS18B;TSFM;MRPL20;MRPL46;MRPL13;MRPS23;MRPL10;MRPL50;MRPL47;GATC;MRPS16;MRPS18C;DAP3;MRPL35;MR…	Oligo
255	GO_Molecular_Function_2023__Ligand-Gated Monoatomic Cation Channel Activity (GO:0099094)	-0.32654	-1.93999	0.00434153	0.0314304	0.997	34/60	28.24%	P2RX5;KCNJ8;KCNJ12;CHRNG;CHRNB2;KCNJ4;P2RX1;CHRNA2;KCNJ6;ASIC4;GRIK1;HTR3C;TRPM4;CHRNA4;KCNJ3;KCNE2;KCNJ16;GRIK5;KCNJ13;KCNH6;CHRNA10;CHRNB3;HTR3E;KCNJ5;CCDC51;KCNH7;CHRNA5;ASIC2;KCNN2;KCNH2;SHROOM2;CHRNB1;KCNK1;KCNK6	Oligo
256	GO_Biological_Process_2023__Regulation Of Nervous System Development (GO:0051960)	-0.36111	-1.93693	0	0.0320892	0.997	20/42	23.62%	ASCL1;HEY1;HES5;GBX1;IL1B;BHLHE40;HEYL;HES7;CX3CR1;CX3CL1;S100A10;TNFRSF1B;HES1;TYMP;WNT3;TENM4;PTPRZ1;LEF1;HES6;NKX6-2	Oligo
257	KEGG_2021_Human__Leishmaniasis	0.284696	1.93656	0.00337838	0.0929371	0.985	22/62	14.10%	MYD88;HLA-DOB;TLR2;TGFB3;FCGR1A;TLR4;IFNG;HLA-DQA1;ITGAM;ITGB2;CR1;IL12A;CR1L;FCGR3A;NFKBIA;C3;HLA-DMA;CYBA;CYBB;NCF1;TGFB2;NCF2	Oligo
258	GO_Biological_Process_2023__Lipopolysaccharide-Mediated Signaling Pathway (GO:0031663)	0.429876	1.93346	0.00271003	0.0935623	0.986	10/18	17.96%	CCL2;TLR4;PLCG2;CD6;TICAM2;BPI;TICAM1;HCK;PTPN22;EHHADH	Oligo
259	GO_Biological_Process_2023__Positive Regulation Of Cytokine-Mediated Signaling Pathway (GO:0001961)	0.31829	1.93233	0	0.0928981	0.986	17/38	16.97%	AGPAT2;PARP9;EDN1;CASP4;PARP14;TXK;TICAM2;LAPTM5;CSF1;IGF2BP1;AXL;NLRC5;USP27X;RBM47;GAS6;FADD;TRIM56	Oligo
260	GO_Molecular_Function_2023__Voltage-Gated Sodium Channel Activity (GO:0005248)	-0.473311	-1.93184	0.00158228	0.0333292	0.997	11/18	23.99%	HCN3;SCN3B;SCN2A;HCN2;SCN1A;SCN3A;SCN4B;SCN2B;SCN10A;SCN1B;SCN5A	Oligo
261	GO_Biological_Process_2023__Sensory Perception Of Light Stimulus (GO:0050953)	-0.30479	-1.93007	0.001443	0.0336862	0.997	43/79	32.85%	TYR;CRYGD;USH1C;COL18A1;SFRP5;CRYBB2;TRPM1;CRYBB1;CRYGB;LUM;PAX2;CHRNB2;RS1;GUCA1C;GUCA1A;DHRS3;CRYBA1;RGS16;PRR4;CACNA1F;ARR3;UNC119;GPR179;POU6F2;GNAT2;CNGB1;NXNL2;PCDH15;GRM8;SLC4A10;PRPH2;CABP4;PDE6C;CRYZ;RABGGTA;ROM1;RDH12;IMPG2;USH2A;COL11A1;KIFC3;EYA4;EML2	Oligo
262	GO_Biological_Process_2023__Oligosaccharide Biosynthetic Process (GO:0009312)	0.402744	1.92822	0.00263852	0.0942405	0.988	12/20	22.90%	FUT3;ST3GAL6;ST6GALNAC1;ST6GALNAC6;ST6GALNAC5;B4GALNT2;FUT6;B4GALT1;FUT9;FUT4;B3GALT4;ST3GAL2	Oligo
263	GO_Biological_Process_2023__Positive Regulation Of Peptidase Activity (GO:0010952)	-0.44659	-1.92733	0.00622084	0.0343093	0.998	15/22	33.11%	MAPK12;PRELID1;PSENEN;NDUFA13;GRN;CTSV;CTSH;PSME1;DDRGK1;CTSS;CLDN4;PSME2;CTSL;CTSK;PINK1	Oligo
264	KEGG_2021_Human__Glycolysis / Gluconeogenesis	-0.33097	-1.92664	0.00432277	0.0343281	0.998	42/57	44.37%	LDHC;LDHAL6B;HKDC1;ENO4;ADH6;FBP2;PFKP;FBP1;PKLR;PFKM;ALDH1B1;LDHB;GAPDHS;ENO3;GAPDH;TPI1;ALDOC;HK1;PCK2;GCK;LDHAL6A;LDHA;PGAM2;ENO2;ADH4;ALDOA;ALDOB;GALM;PGAM1;PGK1;PGM2;GPI;ENO1;PFKL;PKM;G6PC3;PDHB;ALDH9A1;PDHA1;MINPP1;ACSS1;ADH5	Oligo
265	GO_Biological_Process_2023__Metal Ion Transport (GO:0030001)	-0.254891	-1.92467	0	0.034759	0.998	71/151	28.24%	KCNF1;CAV1;SLN;KCNV1;TRPC5;CACNB3;KCNA6;KCNS1;KCNJ8;RAMP2;KCNJ12;SCN3B;SLC5A8;KCNS2;CHRNB2;KCNA1;KCNA4;KCNG2;KCNJ4;KCNK16;SLC5A1;SLC17A7;KCNH4;KCNMB2;ATP2B2;KCNK3;KCNA3;SCN2A;CACNA1S;CACNG8;KCNJ6;SCN1A;RAMP3;TUSC3;SCN3A;KCNK7;KCNQ4;KCNB2;KCNC1;SCN4B;KCNA2;CACNG3;ATP2A3;SLC5A5;CHRNA4;CCL5;KCNA5;KCNJ3;CAMK2A;GRIN3A;KCNJ16;KCNH3;KCNK9;KCNJ13;TRPC4;CALCRL;FGF13;KCNC4;SLC5A2;KCNJ5;KCNMB1;KCNAB3;SCN5A;…	Oligo
266	GO_Biological_Process_2023__Regulation Of Monocyte Chemotaxis (GO:0090025)	-0.488477	-1.9243	0.00791139	0.0346682	0.998	12/17	28.16%	NBL1;CXCL12;SLAMF8;CCN3;DUSP1;CXCL17;CCL5;PLA2G7;GREM1;LYN;CREB3;ANO6	Oligo
267	GO_Biological_Process_2023__Membrane Depolarization During Cardiac Muscle Cell Action Potential (GO:0086012)	-0.487638	-1.92153	0.00802568	0.0353017	0.998	12/16	31.94%	SCN3B;CACNA1G;HCN2;SCN4B;TRPM4;SLC8A1;SCN2B;SCN1B;SCN5A;CACNA1D;CACNB2;CACNA1C	Oligo
268	GO_Biological_Process_2023__Positive Regulation Of Pathway-Restricted SMAD Protein Phosphorylation (GO:0010862)	0.312023	1.92106	0.00314465	0.0976846	0.993	18/42	16.02%	TGFB3;TNXB;TTK;INHA;BMP6;INHBA;INHBC;TGFBR2;GDF15;BMP8A;MSTN;PPARG;RBPMS;BMP2;TGFB2;GDF9;BMP8B;GDF5	Oligo
269	GO_Biological_Process_2023__Regulation Of Voltage-Gated Calcium Channel Activity (GO:1901385)	-0.431925	-1.91855	0.00317965	0.035975	0.998	18/24	40.54%	CACNB3;NPPA;CBARP;STAC;AKAP5;STAC2;CACNB1;STAC3;CABP4;PPP3R1;CACNB4;CACNA1A;CACNB2;GPR35;GNB5;SRI;NOS1AP;PPP3CA	Oligo
270	GO_Biological_Process_2023__Blood Circulation (GO:0008015)	-0.360634	-1.91731	0.00291545	0.0361413	0.998	21/39	26.43%	TNNI3;SGCZ;CXCL12;EDN3;ACTC1;ACE2;OLR1;C3AR1;HTR7;PLN;ELN;SERPING1;ACVRL1;SGCG;F5;GUCY1A1;RANGRF;SOD1;SGCD;TRDN;LPA	Oligo
271	WikiPathway_2023_Human__Nuclear Receptors In Lipid Metabolism And Toxicity WP299	0.374759	1.91485	0.00613497	0.099571	0.995	14/24	22.15%	CYP27B1;ABCB11;RARG;ABCB4;RARA;PPARG;ABCA1;ABCC3;ABCB1;ABCC2;CYP2E1;PPARA;ABCG1;NR1H3	Oligo
272	GO_Biological_Process_2023__Macrophage Activation (GO:0042116)	0.34977	1.91475	0.00321543	0.0982841	0.995	15/32	19.23%	CD93;TLR4;IL13;IFNG;PLCG2;ITGAM;ITGB2;FCGR3A;TLR1;MYO1C;FCER2;SLC11A1;DYSF;EHHADH;CLU	Oligo
273	GO_Biological_Process_2023__Acetylcholine Receptor Signaling Pathway (GO:0095500)	-0.484012	-1.91444	0.00478469	0.0367993	1	10/17	20.23%	CHRM4;LY6H;CHRNB2;CHRM1;RGS8;CHRM2;CHRM3;PLCB1;RGS10;LYPD1	Oligo
274	MSigDB_Hallmark_2020__Spermatogenesis	-0.277758	-1.91301	0.0013624	0.0369689	1	50/114	29.09%	CCNA1;TEKT2;POMC;ADCYAP1;CHRM4;TNNI3;CNIH2;SCG3;HTR5A;NEFH;LDHC;GAD1;IL13RA2;ACE;NPY5R;PCSK1N;NEK2;DDX25;ADAD1;MTNR1A;ACRV1;ADAM2;DMRT1;GSG1;CAMK4;THEG;ART3;SYCP1;CDK1;SHE;PCSK4;DCC;CCNB2;GAPDHS;TCP11;CDKN3;SLC2A5;ZPBP;BUB1;GRM8;KIF2C;CLGN;NAA11;OAZ3;RPL39L;GSTM3;ZC2HC1C;ACRBP;NCAPH;MEP1B	Oligo
275	GO_Biological_Process_2023__Enzyme-Linked Receptor Protein Signaling Pathway (GO:0007167)	0.233648	1.9096	0	0.100158	0.996	38/111	16.62%	ROR1;CASS4;FGFR3;ROS1;PDGFRB;EPHA2;BLK;CD4;GUCY2C;EGFR;SH2D6;FGFR4;BDKRB2;NTF3;LRP1;ZAP70;JAK3;LCK;GUCY2F;LCP2;CD8A;MPZL1;CSF1;CSF1R;GP6;AXL;MERTK;FGFR1;NTRK2;ROR2;HCK;PILRB;LTK;MST1R;GUCA1B;SHC2;ERBB2;MET	Oligo
276	GO_Biological_Process_2023__Positive Regulation Of Peptidyl-Tyrosine Phosphorylation (GO:0050731)	0.237113	1.90559	0	0.101467	0.997	30/103	10.35%	CLEC6A;CD44;CASS4;FCGR1A;ANGPT1;AMH;ITGA5;FGFR3;THBS4;IFNG;BMP6;TNFRSF1A;PLCG2;HGF;PARP9;IL34;NTF3;CTF1;IFNA2;PTPRC;IL15;IL12A;DOK7;CD40;BANK1;PARP14;ITGB3;IL6R;CSF1R;TNFSF18	Oligo
277	GO_Biological_Process_2023__Regulation Of Cation Channel Activity (GO:2001257)	-0.344538	-1.90511	0.0030349	0.0393718	1	29/47	34.13%	FKBP1B;CACNB3;KCNS1;HCN3;KCNS2;JPH4;STAC;JPH1;HCN2;CACNB1;HCN1;KCNE2;NETO1;JSRP1;FGF13;JPH3;FGF12;CTSS;CABP4;FGF14;VAMP2;CACNB4;CACNA1A;CACNB2;PDE4D;EDNRA;FKBP1A;CALM2;CALM1	Oligo
278	GO_Biological_Process_2023__Antimicrobial Humoral Immune Response Mediated By Antimicrobial Peptide (GO:0061844)	-0.454804	-1.90475	0.00320513	0.0393067	1	15/20	31.90%	CXCL14;GNLY;F2;H2BC8;FAU;H2BC12;CXCL13;PGLYRP1;GAPDH;ROMO1;NRG1;RPL30;LEAP2;RPS19;RPL39	Oligo
279	WikiPathway_2023_Human__Regulatory Circuits Of The STAT3 Signaling Pathway WP4538	0.260814	1.90457	0.00387597	0.100714	0.997	25/70	18.44%	AGTR1;IL2RA;PDGFRB;IL3RA;IL15RA;EGFR;CTF1;JAK3;IL10RA;CNTFR;PTPRC;CSF2RA;SOCS3;IL10RB;IL6R;MAPK7;IL2RB;IL5RA;IL11RA;IL20RA;GHR;IL12RB2;MPL;TYK2;SETD7	Oligo
280	WikiPathway_2023_Human__Striated Muscle Contraction Pathway WP383	-0.407774	-1.90374	0.00151286	0.0393632	1	18/30	27.09%	ACTN2;TNNI3;ACTA1;TCAP;TNNT2;MYH6;TPM2;MYH8;ACTC1;MYL9;ACTA2;MYBPC2;MYBPC3;MYBPC1;TTN;VIM;TNNT1;ACTG1	Oligo
281	GO_Biological_Process_2023__Transport Across Blood-Brain Barrier (GO:0150104)	0.251016	1.90278	0	0.100738	0.997	32/81	17.96%	SLC38A1;SLC1A5;ATP1A4;SLC22A3;SLCO1C1;ABCC4;LRP1;SLCO2B1;SLC22A1;SLC6A20;SLC22A5;SLC8A2;ATP1A2;SLC28A2;SLC38A5;SLC22A2;SLC29A1;AGER;SLC4A4;SLC7A2;ABCG2;LRP2;ABCC3;ABCB1;SLC6A6;ATP1B2;ABCC2;SLC7A8;SLC15A2;MFSD2A;LRP3;SLC6A9	Oligo
282	KEGG_2021_Human__Cholinergic synapse	-0.280607	-1.90079	0.00273224	0.0402619	1	42/106	21.34%	GNG3;CHRM4;PLCB2;KCNQ2;GNG13;KCNJ12;GNG10;CHRNB2;KCNJ4;PRKCG;CHRM1;PIK3R5;CREB3L3;CHRM2;FOS;CACNA1S;ADCY7;CREB3L1;KCNJ6;CAMK4;PIK3R6;GNG2;CACNA1F;KCNQ4;ADCY1;CHRM3;GNG4;CAMK2B;PLCB4;CHRNA4;GNG11;KCNQ3;GNGT1;PIK3R3;KCNJ3;CAMK2A;ACHE;PLCB1;KCNQ1;GNB2;KCNQ5;ADCY2	Oligo
283	WikiPathway_2023_Human__Zinc Homeostasis WP3529	0.334322	1.8993	0.00589971	0.101659	0.997	11/33	10.00%	MT1A;MT1X;SLC39A5;MT2A;MT1H;MT1M;MT3;MT1G;MT1E;MT1F;SLC39A12	Oligo
284	GO_Biological_Process_2023__Positive Regulation Of Interleukin-12 Production (GO:0032735)	0.366626	1.89888	0.00588235	0.100637	0.997	11/25	12.99%	TLR2;TLR4;IFNG;TLR3;PLCG2;LGALS9;CD40;CLEC7A;LAPTM5;MDK;IL16	Oligo
285	GO_Biological_Process_2023__Mitochondrial Gene Expression (GO:0140053)	-0.281826	-1.89836	0	0.0408059	1	74/103	52.87%	MRPL54;GADD45GIP1;MRPS28;MRPL40;MRPL12;MRPS6;MRPL55;MRPL17;MRPL34;NDUFA7;MRPS12;MRPS34;MRPL28;MRPL51;MRPL53;MRPS2;MRPL23;MRPS26;MRPS17;MRPL41;CHCHD1;MRPL36;TWNK;MRPL21;MRPL14;MRPL49;MRPS7;MRPL57;MTG1;MRPL38;MRPL24;MRPL27;MRPL2;MRPS15;FASTK;MRPL4;MRPL18;MRPL9;MRPL11;MRPL58;MRPL52;MRPL43;TBRG4;MRPS33;MRPS18A;MRPS21;MRPS18B;MRPL20;MRPL46;MRPL13;POLRMT;MRPS23;MRPL10;MRPL50;TFB2M;MRPL47;GATC;MRPS16;MR…	Oligo
286	GO_Biological_Process_2023__Cellular Response To Steroid Hormone Stimulus (GO:0071383)	-0.439118	-1.89655	0.0048	0.0412254	1	12/22	24.95%	HSPA1B;ATP1A3;HSPA1A;HSPA8;MGARP;ADTRP;AKR1C3;BMP4;SRC;GPER1;TRERF1;BMP7	Oligo
287	GO_Biological_Process_2023__Regulation Of Mononuclear Cell Migration (GO:0071675)	0.407818	1.89591	0.0078534	0.101245	0.998	9/20	10.29%	CMKLR1;SLIT2;IL34;THBS1;MDK;LGALS3;MSTN;CSF1;CSF1R	Oligo
288	GO_Biological_Process_2023__Cardiac Muscle Cell Differentiation (GO:0055007)	-0.446684	-1.89333	0.00608828	0.042186	1	13/21	24.39%	MESP1;TCAP;ALPK2;MYH6;VEGFA;MEF2C;ASB2;SLC8A1;TTN;MYOCD;GREM1;NRG1;AKAP13	Oligo
289	WikiPathway_2023_Human__Prostaglandin And Leukotriene Metabolism In Senescence WP5321	-0.383516	-1.89158	0.0078125	0.0425863	1	17/31	24.01%	ALOX12;MAPK11;PTGS2;PTGER4;IGFBP5;DPEP2;ALOX5AP;PTGDS;PRXL2B;ALOX5;PTGS1;PLCB1;PTGER1;PLA2G4A;HRAS;PTGIS;PTGER3	Oligo
290	GO_Biological_Process_2023__Regulation Of Interleukin-6 Production (GO:0032675)	0.245385	1.89013	0.00398406	0.103854	0.998	43/91	24.52%	MYD88;TLR2;LILRA2;TLR4;ZC3H12A;IFNG;NLRP10;ELF4;TLR3;GHRL;PLCG2;LGALS9;TLR6;CLEC7A;TNFAIP3;BPI;IRAK3;IL6R;TLR1;AGER;C5AR2;CYBA;NLRC3;CD84;NMBR;IL16;ARRB1;GAS6;PTPN22;POU2F2;EHHADH;TNFSF4;C1QTNF3;IFIH1;TIRAP;RIGI;IL17D;LCP1;IL17RA;STAT3;MAVS;CD200;BCL10	Oligo
291	WikiPathway_2023_Human__Complement And Coagulation Cascades WP558	-0.338972	-1.88736	0.00293255	0.0437753	1	27/51	22.90%	C6;MASP1;F2R;F2;C1QC;C9;C1QA;MASP2;SERPIND1;C3AR1;KLKB1;CFH;PROC;SERPING1;KNG1;F10;C7;CFD;F12;F5;PLG;SERPINC1;C8G;CPB2;CFB;F7;C1R	Oligo
292	GO_Biological_Process_2023__Sensory Perception Of Smell (GO:0007608)	0.323761	1.88677	0	0.104834	0.998	13/34	9.38%	OR7A5;DRD2;OR52A1;OR10H1;OR2M3;SLC24A4;OR2K2;OR2M2;OR2L2;OR2B8P;OR2M4;OR2AK2;OR2F1	Oligo
293	GO_Biological_Process_2023__Positive Regulation Of Release Of Cytochrome C From Mitochondria (GO:0090200)	-0.435114	-1.88545	0.00469484	0.0440281	1	12/23	19.71%	PYCARD;PMAIP1;TNFSF10;BIK;BID;BBC3;HRK;MLLT11;BMF;BAX;MOAP1;GPER1	Oligo
294	GO_Biological_Process_2023__Axonogenesis (GO:0007409)	-0.248884	-1.88532	0.00127389	0.04388	1	69/181	24.28%	CCK;WNT7A;SEMA3G;ARHGEF25;LRTM2;EPHB3;ISL2;NEFH;CXCL12;EFNA4;WNT5A;RAB3A;CNTN1;CDK5;BDNF;PAX2;EFNB1;SEMA5A;SLITRK3;EPHB6;IGSF9;EFNB3;RET;NRXN1;LGI1;EMB;EPHB2;S100A6;DPYSL5;EFNA3;LRTM1;NOTCH3;SSNA1;TUBB3;PAK3;DCC;SLITRK4;TNR;EPHA4;CNTN4;LGR6;NRCAM;PTPRO;L1CAM;NTNG1;PLEKHG4;BAIAP2;PLEKHG4B;NELL1;SHH;ROBO2;NIBAN2;NELL2;SEMA3F;EPHA6;SLIT1;ANOS1;EPHA7;HSP90AB1;EFNA5;EPHA5;PLXNA3;CNTN5;SEMA6C;SCN1B;LYP…	Oligo
295	KEGG_2021_Human__Axon guidance	-0.249801	-1.88456	0	0.0440154	1	75/178	27.83%	SEMA3G;PARD6A;TRPC5;EPHB3;CXCL12;EFNA4;WNT5A;NFATC4;CDK5;EFNB1;PAK6;SEMA5A;EPHB6;WNT4;RAC3;ABLIM3;EFNB3;CXCR4;PLXNA2;PAK5;RHOD;EPHB2;FES;DPYSL5;EFNA3;GDF7;MYL9;UNC5A;SMO;RGMA;PAK3;DCC;RRAS;CAMK2B;PLXNA4;RND1;RAC2;EPHA4;L1CAM;NGEF;NTNG1;NTN1;PIK3R3;CAMK2A;SHH;ROBO2;SRC;UNC5D;SEMA3F;TRPC4;EPHA6;ABLIM1;SLIT1;PLXNB2;MYL12A;NRP1;EPHA7;EFNA5;EPHA5;HRAS;PLXNA3;SEMA6C;CFL1;EFNA2;SEMA3A;BMP7;LIMK2;LIMK1;P…	Oligo
296	GO_Biological_Process_2023__B Cell Receptor Signaling Pathway (GO:0050853)	0.35092	1.88343	0	0.105649	0.998	13/27	16.05%	BCL2;BLK;PLCG2;LIME1;LCK;ITK;PTPRC;MNDA;BTK;VAV3;PIK3CD;CD38;NFATC2	Oligo
297	GO_Biological_Process_2023__Outer Dynein Arm Assembly (GO:0036158)	-0.445029	-1.88284	0.00481541	0.0444644	1	15/21	32.20%	ZMYND10;LRRC61;DNAAF4;CLXN;DNAH5;CCDC63;DNAAF6;DNAAF11;DNAAF1;ODAD2;ODAD3;DNAH17;DNAH8;DNAAF8;ODAD4	Oligo
298	GO_Biological_Process_2023__Synaptic Transmission, Glutamatergic (GO:0035249)	-0.406215	-1.8814	0.00607903	0.0448712	1	16/27	27.65%	SLC17A6;SLC17A7;UNC13A;GRIN2B;GRIN3B;GRIK1;GRID2;SLC17A8;GRIN3A;GRIN2C;GRIA1;GRIK5;GRIN2A;UNC13C;GRIN2D;GRIA3	Oligo
299	GO_Biological_Process_2023__Male Gonad Development (GO:0008584)	-0.385282	-1.87713	0.00311526	0.0462059	1	18/33	23.04%	KIT;SIX4;WNT5A;BIK;SOX15;WNT4;ADAM29;GATA1;ADAM2;FSHR;AKR1C3;FGF9;KITLG;GATA4;MEA1;DNAAF11;ADAM21;ADAM20	Oligo
300	GO_Biological_Process_2023__Positive Regulation Of Synaptic Transmission (GO:0050806)	-0.310969	-1.87591	0.00145138	0.0464332	1	45/71	39.92%	NFATC4;DRD1;RGS14;NMU;CLSTN3;GRIN1;NRXN1;CACNG8;LGI1;BAIAP3;EPHB2;GRIN2B;AKAP5;SYT1;CACNG2;SLC8A3;ADRA1D;FOXM1;PLK2;CACNG3;CRHR2;ZDHHC12;GRIN2C;RIMS4;GPER1;RIMS2;GRIN2A;TSHZ3;RIMS3;CLSTN2;RIMS1;GRIN2D;VAMP2;STX1B;STX4;RELN;DLG4;APEX1;CHRNA7;SHISA7;CACNG7;PRKCZ;SLC24A1;SHANK3;FLOT1	Oligo
301	GO_Molecular_Function_2023__Active Monoatomic Ion Transmembrane Transporter Activity (GO:0022853)	-0.446741	-1.87534	0.00624025	0.0464538	1	13/21	23.87%	COX7A1;SLC18A2;COX4I2;COX8A;UQCR10;COX5B;COX4I1;COX7C;COX6B1;UQCRB;COX5A;UQCRH;COX7B	Oligo
302	GO_Biological_Process_2023__Negative Regulation Of Viral Genome Replication (GO:0045071)	0.303903	1.87534	0	0.109541	0.998	21/44	24.78%	RSAD2;LTF;BTBD17;OAS3;APOBEC3G;APOBEC3H;PLSCR1;IFITM3;IFITM2;HMGA2;APOBEC3A;ZC3HAV1;FAM111A;MX1;ISG20;IFIH1;IFI16;INPP5K;MAVS;IFIT5;MPHOSPH8	Oligo
303	GO_Molecular_Function_2023__Cytokine Activity (GO:0005125)	-0.284371	-1.87514	0.00135135	0.0463287	1	38/89	18.47%	WNT7A;WNT10B;CD70;ENC1;WNT16;CXCL12;WNT5A;BMP3;BMP5;GDF10;IL1B;VEGFA;WNT2;WNT4;CNTF;INHBB;ALKAL2;WNT9A;TNFSF11;ALKAL1;CX3CL1;LEFTY1;FAM3B;KITLG;BMP4;GDF7;CRLF1;WNT9B;CXCL13;NODAL;CCL5;CCL26;IL33;WNT7B;WNT3;IL7;IL22;INHBE	Oligo
304	GO_Biological_Process_2023__Regulation Of miRNA-mediated Gene Silencing (GO:0060964)	0.433705	1.87083	0.0080429	0.111323	0.998	5/15	10.44%	ZFP36;TRIM71;POU5F1;PPARG;LIMD1	Oligo
305	GO_Biological_Process_2023__Antimicrobial Humoral Response (GO:0019730)	-0.369505	-1.87068	0.00900901	0.0478318	1	24/36	31.90%	PRTN3;CXCL14;PRSS3;GNLY;RARRES2;F2;JCHAIN;H2BC8;FAU;AZU1;H2BC12;CXCL13;PGLYRP1;GAPDH;WFDC10B;ROMO1;NRG1;HLA-A;WFDC3;RPL30;LEAP2;RPS19;WFDC2;RPL39	Oligo
306	GO_Biological_Process_2023__Axon Development (GO:0061564)	-0.287059	-1.87066	0	0.0476316	1	29/87	16.68%	CCK;WNT7A;NEUROD6;ATOH7;EPHB3;ISL2;NEFH;RAB3A;CDK5;PAX2;NEUROD2;SEMA5A;RTN4RL2;SLITRK3;MGARP;GAP43;EPHB2;S100A6;SSNA1;RTN4RL1;PAK3;DCC;SLITRK4;CNTN4;CRTAC1;NRCAM;L1CAM;NTNG1;BAIAP2	Oligo
307	GO_Biological_Process_2023__Positive Regulation Of Mitochondrion Organization (GO:0010822)	-0.32589	-1.868	0.00423729	0.0484262	1	29/56	33.11%	PYCARD;PMAIP1;TNFSF10;TREM2;BIK;BID;MGARP;BBC3;HRK;CHCHD10;MLLT11;BMF;KDR;BAX;MOAP1;GPER1;FIS1;HTRA2;DCN;PPARGC1A;PPIF;PARK7;BNIP3;BAD;CAMKK2;PLD6;AURKA;ZNF205;PINK1	Oligo
308	MSigDB_Hallmark_2020__UV Response Up	-0.254733	-1.86776	0	0.0482905	1	99/151	45.31%	CCK;OLFM1;GPX3;AQP3;TUBA4A;BID;GAL;ATP6V1F;FOSB;SPR;FOS;RET;GGH;IGFBP2;FGF18;LHX2;MAOA;HTR7;SLC25A4;CTSV;HMOX1;C4BPB;GCH1;UROD;AP2S1;GRINA;MMP14;POLE3;APOM;JUNB;NR4A1;NTRK3;MRPL23;HYAL2;CDKN1C;FEN1;PRKCD;RRAD;DGAT1;SIGMAR1;MAPK8IP2;TACR3;H2AX;LYN;SELENOW;RASGRP1;CHRNA5;ENO2;KCNH2;PSMC3;NPTXR;PPIF;ALAS1;ALDOA;CCNE1;CA2;ASNS;CYB5R1;ARRB2;CDO1;RHOB;FKBP4;BTG1;POLR2H;RXRB;KLHDC3;DLG4;ACAA1;WIZ;DNAJA1…	Oligo
309	GO_Biological_Process_2023__Positive Regulation Of Small GTPase Mediated Signal Transduction (GO:0051057)	-0.481582	-1.86651	0.00780031	0.0485627	1	12/17	29.36%	RASGRF1;MMD2;IGF1;FGF10;NTRK1;NGF;RASGEF1A;RASGRP4;SRC;RASGRP1;RELN;ITGAV	Oligo
310	GO_Molecular_Function_2023__Delayed Rectifier Potassium Channel Activity (GO:0005251)	-0.425076	-1.86552	0.00765697	0.0487961	1	15/24	22.02%	KCNA6;KCNS1;KCNA4;KCNG2;KCNA3;KCNC2;KCNB2;KCNC1;KCNA2;KCNA5;KCNB1;KCNE2;KCNG3;KCNQ1;KCNC4	Oligo
311	GO_Biological_Process_2023__Cell Chemotaxis (GO:0060326)	-0.363646	-1.86541	0.00150376	0.0486243	1	19/38	22.01%	KIT;ARHGEF16;PDGFRA;ENC1;PDGFB;CXCL12;VEGFA;EGR3;SEMA5A;CCN3;CX3CL1;BIN2;AZU1;RAB13;PARVA;NELL1;NR4A1;LEF1;PRKCD	Oligo
312	WikiPathway_2023_Human__Hematopoietic Stem Cell Differentiation WP2849	-0.346919	-1.86486	0.00292826	0.0486627	1	24/43	26.28%	LYL1;IL1B;IKZF1;CXCR4;FOSB;VAV1;FOS;GATA1;THRB;MYB;TRIM29;NCKAP1L;KITLG;CBFA2T3;FLI1;LMO2;TRAF3IP3;LEF1;CD34;HES6;RUNX1;PIM1;KCNH2;TPO	Oligo
313	GO_Biological_Process_2023__Actin Filament Bundle Organization (GO:0061572)	-0.381395	-1.86482	0.00735294	0.0484729	1	21/32	35.64%	USH1C;ESPNL;RHOD;RFLNB;LIMD2;MYO1B;ESPN;DMTN;BAIAP2;BAIAP2L1;AIF1;DPYSL3;ADD2;EZR;PAWR;SHROOM2;PLS1;NEDD9;MICAL1;FSCN1;CORO1B	Oligo
314	GO_Molecular_Function_2023__Cysteine-Type Endopeptidase Activator Activity Involved In Apoptotic Process (GO:0008656)	-0.47316	-1.86481	0.00792393	0.0482689	1	12/17	32.29%	PYCARD;CTSV;CTSH;ATP2A3;BEX3;NLRP12;CTSS;NLRP1;BAD;CTSL;RACK1;CTSK	Oligo
315	GO_Molecular_Function_2023__Single-Stranded RNA Binding (GO:0003727)	0.306701	1.86225	0.00560224	0.116833	0.998	38/41	58.53%	DDX60;DDX60L;DHX58;ADARB2;SOX9;DDX11;L1TD1;RBM11;IFIH1;RBM7;RIGI;IFIT5;LACTB2;PUS1;EXOSC10;FMR1;AGO4;AGO2;CNBP;HNRNPU;ZFR;FXR1;AQR;DHX9;HNRNPC;AGO3;HNRNPF;ILF3;AGO1;DDX3X;IGHMBP2;U2AF2;STRBP;ENDOV;HNRNPA1;PTBP1;LONP1;JMJD6	Oligo
316	GO_Biological_Process_2023__Embryonic Digestive Tract Development (GO:0048566)	0.448754	1.86102	0.00498753	0.116305	0.998	9/16	16.98%	SOX11;GLI3;STRA6;GLI2;FOXF1;RBPMS2;PKDCC;TGFB2;PCSK5	Oligo
317	GO_Biological_Process_2023__Cellular Response To Xenobiotic Stimulus (GO:0071466)	-0.421366	-1.85631	0.00777605	0.0514631	1	14/23	28.29%	IL1B;HTR1B;MYC;MEF2C;VAV1;DPEP1;FBP1;KCNE2;KCNQ1;CRHBP;PPM1E;PPM1F;KCNH2;VAV2	Oligo
318	GO_Biological_Process_2023__Regulation Of Transport (GO:0051049)	-0.351936	-1.85556	0.00291971	0.051544	1	29/40	47.27%	TMEM102;DISP3;PTPRN;CDK5;SLC30A8;FES;ICA1;RAB25;RSC1A1;NELL1;LRRK2;REEP6;CLDN10;ACTG1;VAMP2;LEPR;PTPRN2;YRDC;PINK1;DNAJA1;USP6;ARL6IP5;PLD2;POFUT2;MUL1;SURF4;REEP5;SNCA;RAB11A	Oligo
319	GO_Biological_Process_2023__Cardiac Muscle Tissue Development (GO:0048738)	-0.35359	-1.85525	0.00294551	0.0514514	1	21/41	25.75%	MESP1;MSC;SGCZ;HEY1;TCAP;BMP5;NPPA;CSRP3;ASB2;GATA4;SGCG;TTN;MYOCD;GREM1;NRG1;PRMT1;SCN5A;AKAP13;ZFPM1;BMP7;SGCD	Oligo
320	KEGG_2021_Human__African trypanosomiasis	0.337093	1.85429	0.00869565	0.119683	0.998	12/29	11.03%	MYD88;HPR;IDO1;IFNG;ICAM1;PLCB3;IDO2;IL12A;FAS;HBA1;APOA1;SELE	Oligo
321	GO_Biological_Process_2023__Positive Regulation Of Cell Adhesion (GO:0045785)	-0.299231	-1.85427	0.00138504	0.0517195	1	38/75	29.36%	RELL2;TMEM102;PDGFB;CXCL12;VEGFA;SFRP2;CITED2;RAC3;TNFRSF18;NDNF;RET;FOXC2;RHOD;NCKAP1L;AZU1;LAMA2;CHRD;NPNT;CIB1;CCR7;NODAL;EPHA4;CCL5;NID1;LAMA1;SYK;ARL2;C1QBP;ADAM8;ECM2;CCDC80;EPB41L4B;DUSP26;PPM1F;VIT;LAMB1;STX4;ITGAV	Oligo
322	GO_Biological_Process_2023__T Cell Differentiation (GO:0030217)	0.298237	1.85324	0.00320513	0.119161	0.998	17/41	16.82%	GLI3;FCER1G;RHOH;CD4;DLL4;MR1;ZAP70;ZFP36L1;LCK;PTPRC;LFNG;CD8A;PIK3CD;SPI1;PTPN22;FADD;RAG1	Oligo
323	GO_Biological_Process_2023__Gamma-Aminobutyric Acid Signaling Pathway (GO:0007214)	-0.455181	-1.85271	0.00501672	0.0521568	1	11/19	15.92%	GABRG3;GABRR1;GABRA1;GABRA4;GABRA3;GABRG2;GABBR2;GABRB2;GABRG1;GABRA2;GABRA5	Oligo
324	GO_Biological_Process_2023__Chloride Transmembrane Transport (GO:1902476)	-0.336624	-1.8524	0.0042796	0.0520667	1	26/47	28.18%	SLC12A5;GABRG3;APOL1;GABRA1;SLC5A1;GABRA4;SLC12A7;GABRA3;GABRG2;GLRA3;GABRB2;GABRG1;ANO3;GABRA2;GABRA5;GLRB;SLC12A1;ANO5;SLC1A1;GLRA2;GABRB3;SLC4A1;GLRA1;ANO6;SLC12A8;ANO8	Oligo
325	GO_Molecular_Function_2023__Chloride Transmembrane Transporter Activity (GO:0015108)	-0.320717	-1.85067	0.00721501	0.0525414	1	27/51	28.71%	SLC17A6;SLC12A5;FXYD3;APOL1;SLC17A7;GABRG2;GLRA3;SLC17A8;GABRB2;ANO3;FXYD1;CLIC1;ANO5;SLC1A1;SLC26A3;GLRA2;SLC4A1;GLRA1;CLCA1;SLC26A5;CLCN7;CLDN4;SLC26A6;TTYH3;ANO6;ANO8;SLC26A8	Oligo
326	GO_Biological_Process_2023__Prostaglandin Metabolic Process (GO:0006693)	-0.396527	-1.85027	0.00802568	0.0524696	1	15/27	23.49%	HPGD;AKR1C1;GSTA1;PTGS2;AKR1C3;HPGDS;PTGDS;CD74;GSTP1;PRXL2B;CYP2S1;PTGS1;PLA2G4A;AKR1C2;PTGIS	Oligo
327	GO_Biological_Process_2023__Regulation Of T Cell Migration (GO:2000404)	-0.460742	-1.8502	0.00642055	0.052272	1	10/18	18.26%	PYCARD;TMEM102;CXCL12;TNFRSF14;CD200R1;DOCK8;CCL5;RIPOR2;LRCH1;AIF1	Oligo
328	WikiPathway_2023_Human__Extrafollicular And Follicular B Cell Activation By SARS CoV 2 WP5218	0.29085	1.8496	0	0.120321	0.998	21/47	18.55%	CR2;TBX21;MFGE8;TLR4;EBI3;IFNG;IRF4;ITGB2;CR1;SELL;PTPRC;IL12A;CD40;MAF;C3;BCL6;STAT5A;BTLA;ETS1;ICOSLG;BCR	Oligo
329	WikiPathway_2023_Human__Wnt Signaling WP428	-0.273617	-1.84897	0.0013459	0.052511	1	43/102	27.04%	WNT7A;SFRP5;WNT10B;WNT16;NOTUM;PLCB2;WNT5A;NFATC4;FZD9;SFRP2;CCND2;NFATC1;WNT2;WNT4;DKK1;FOSL1;PRKCG;MYC;SERPINF1;NKD2;PRICKLE1;FRAT2;CCND1;WIF1;FZD1;CSNK2A3;CAMK2B;PLCB4;CAMK2A;WNT7B;WNT3;PLCB1;DKK2;GPC4;FZD6;LEF1;SFRP1;TCF7;LRP5;CSNK2B;SFRP4;TCF7L1;PPP3R1	Oligo
330	GO_Biological_Process_2023__Regulation Of Calcium Ion Transmembrane Transporter Activity (GO:1901019)	-0.403971	-1.84673	0.00316957	0.053265	1	18/27	34.13%	FKBP1B;SLN;CACNB3;JPH4;CAV3;JPH1;PLN;CACNB1;JSRP1;JPH3;CABP4;CACNB4;CACNA1A;CACNB2;PDE4D;FKBP1A;CALM2;CALM1	Oligo
331	GO_Biological_Process_2023__Negative Regulation Of Cytokine Production (GO:0001818)	0.207354	1.84588	0	0.120589	0.998	46/153	15.39%	ZFP36;VSIG4;TBX21;CMKLR1;TLR4;KLF4;INHA;ZC3H12A;IFNG;CLEC4A;INHBA;ELF4;GHRL;CR1;JAK3;LILRB1;CD33;LGALS9;TLR6;IFNA2;PTPRC;IL12A;DHX58;TNFAIP3;THBS1;BPI;IRAK3;VSIR;LAPTM5;BTN2A2;RARA;AGER;C5AR2;SRGN;APOA1;AXL;GBP1;SSC5D;NLRC3;CD84;XAF1;NMBR;SLC11A1;ARRB1;GAS6;PTPN22	Oligo
332	GO_Cellular_Component_2023__Ionotropic Glutamate Receptor Complex (GO:0008328)	-0.372606	-1.84155	0.00455927	0.0551203	1	19/33	27.65%	VWC2;SHISA8;GRIN1;CACNG8;GRIN2B;OLFM2;GRIN3B;GRIK1;GRID2;CACNG3;GRIN3A;GRIN2C;GRIA1;GRIK5;SHISA9;GRIN2A;VWC2L;GRIN2D;GRIA3	Oligo
333	GO_Biological_Process_2023__Detection Of Chemical Stimulus Involved In Sensory Perception Of Smell (GO:0050911)	0.381883	1.84141	0.00892857	0.122385	0.998	10/21	9.38%	OR10H1;OR2M3;SLC24A4;OR2K2;OR2M2;OR2L2;OR2B8P;OR2M4;OR2AK2;OR2F1	Oligo
334	GO_Biological_Process_2023__Positive Regulation Of Reproductive Process (GO:2000243)	-0.41511	-1.84104	0.00911854	0.0551487	1	15/25	25.50%	VIP;CACNA1H;TACR2;VEGFA;INHBB;CCDC87;TACR1;PDE3A;PLCB1;LHFPL2;C1QBP;ZP3;GLRA1;TACR3;ASIC2	Oligo
335	GO_Biological_Process_2023__Chloride Transport (GO:0006821)	-0.295094	-1.83718	0.00561798	0.0567213	1	37/72	28.71%	SLC12A5;SLC5A8;FXYD3;GABRG3;APOL1;GABRA1;SLC5A1;SLC17A7;GABRA4;SLC12A7;GABRA3;GABRG2;GLRA3;GABRB2;GABRG1;ANO3;GABRA2;GABRA5;FXYD1;GLRB;SLC12A1;CLIC1;ANO5;SLC1A1;GLRA2;GABRB3;SLC4A1;GLRA1;SLC4A10;SLC26A5;CLCN7;SLC26A6;TTYH3;ANO6;SLC12A8;ANO8;SLC26A8	Oligo
336	WikiPathway_2023_Human__Vitamin D Receptor Pathway WP2877	0.213687	1.83165	0	0.128689	1	46/132	17.48%	CYP27B1;IL1RL1;CDKN1A;BDKRB1;PTH;KLF4;SOSTDC1;HLA-DQA1;BMP6;NOX1;IRF4;CDKN2A;ADAMTS5;ITGAM;CDKN2B;TRPV6;IGSF9B;TNFRSF11B;COLEC11;LGALS9;IL12A;CD40;TNFAIP3;EPHB4;CLDN2;FGF23;CDK2;SULT2A1;DACT2;CBS;BCL6;SALL4;SULT1C2;NINJ1;ID4;TIMP3;ABCB1;CREG2;TGFB2;TRPV5;BTLA;NFATC2;CRACR2A;TPM1;SEMA3B;ADGRE5	Oligo
337	GO_Biological_Process_2023__Histone H4 Acetylation (GO:0043967)	0.300652	1.83135	0	0.127541	1	37/38	64.74%	ING4;JADE2;MORF4L2;KANSL2;KANSL1;JADE1;TRRAP;MBTD1;KANSL3;KAT7;EPC1;MSL2;PHF20;OGT;EP400;MSL1;EPC2;MEAF6;BRD8;MORF4L1;YEATS4;RUVBL1;ACTL6A;ING3;MSL3;VPS72;ING5;DMAP1;NAA40;KAT8;MCRS1;WDR5;MRGBP;KAT5;HCFC1;RUVBL2;JADE3	Oligo
338	KEGG_2021_Human__Dopaminergic synapse	-0.258919	-1.83058	0	0.0589475	1	66/122	40.62%	GNG3;DRD5;MAPK12;SLC18A2;MAPK11;CALY;PLCB2;GNG13;DRD1;DDC;GNG10;CALM3;PRKCG;CREB3L3;FOS;CREB3L1;KCNJ6;SCN1A;GRIN2B;MAOA;GNG2;PPP1R1B;GNG4;CAMK2B;PLCB4;GNG11;GNGT1;CALML4;LRTOMT;KCNJ3;CAMK2A;MAOB;PLCB1;GRIA1;GNB2;GRIN2A;MAPK13;KCNJ5;CREB3;ATF4;GRIA3;KIF5A;ITPR1;CACNA1D;CREB3L4;CACNA1A;ARRB2;CACNA1C;GNG7;PRKCA;CALM2;PPP2R2C;GNB5;CALM1;ATF6B;GNAL;GRIA4;GNB4;GSK3A;PPP2R5D;PPP1CA;KCNJ9;PPP2CA;AKT1;PPP…	Oligo
339	GO_Biological_Process_2023__Nuclear-Transcribed mRNA Catabolic Process, Deadenylation-Dependent Decay (GO:0000288)	0.308624	1.82659	0.00304878	0.129013	1	36/37	64.14%	ZFP36;SAMD4A;PATL2;SAMD4B;EXOSC3;EXOSC2;EXOSC9;DCP1B;CNOT10;CNOT2;CNOT9;DIS3;CNOT6L;PARN;CNOT11;TUT7;TUT4;RC3H2;DCP1A;CNOT4;RC3H1;DCP2;PATL1;CNOT6;CNOT8;CNOT7;EXOSC8;EXOSC7;PDE12;CNOT3;LSM1;NT5C3B;DCPS;PNLDC1;PAN2;TNKS1BP1	Oligo
340	GO_Biological_Process_2023__Visual Perception (GO:0007601)	-0.285772	-1.82444	0.00286123	0.0616099	1	42/79	32.85%	TYR;CRYGD;COL18A1;SFRP5;CRYBB2;TRPM1;CRYBB1;CRYGB;LUM;PAX2;CHRNB2;RS1;GUCA1C;GUCA1A;DHRS3;CRYBA1;RGS16;PRR4;CACNA1F;ARR3;UNC119;GPR179;REEP6;POU6F2;GNAT2;CNGB1;NXNL2;GRM6;GRM8;SLC4A10;PRPH2;CABP4;PDE6C;CRYZ;RABGGTA;ROM1;RDH12;IMPG2;COL11A1;KIFC3;EYA4;EML2	Oligo
341	KEGG_2021_Human__Alcoholism	-0.253091	-1.82379	0.00131406	0.061689	1	67/129	37.60%	CRH;NPY;GNG3;SLC18A2;GNG13;H3C6;DRD1;PDYN;H2AC7;H2BC7;DDC;GNG10;BDNF;CAMKK1;CALM3;H2BC15;GRIN1;FOSB;H4C3;CREB3L3;H2AZ1;CREB3L1;SLC29A2;GRIN2B;MAOA;CAMK4;H2BC8;GNG2;GRIN3B;PPP1R1B;H3C12;H2BC12;HDAC10;GNG4;H3-3B;GNG11;GNGT1;CALML4;MAOB;GRIN3A;ADORA2B;GRIN2C;GNB2;GRIN2A;H2AC8;HRAS;H2AJ;H2AX;CREB3;H2AC20;ATF4;GRIN2D;H4C5;CAMKK2;CREB3L4;GNG7;CALM2;HDAC9;GNB5;CALM1;ATF6B;ARAF;SHC1;HDAC5;MAPK3;SHC3;GNB4	Oligo
342	KEGG_2021_Human__Th1 and Th2 cell differentiation	0.248043	1.82304	0.0035461	0.130522	1	27/76	18.28%	HLA-DOB;TBX21;IL2RA;IL13;IFNG;HLA-DQA1;CD4;DLL4;ZAP70;JAK3;LCK;IL12A;NOTCH2;NFKBIA;JAG1;MAML2;MAF;IL4R;IL2RB;HLA-DMA;LAT;STAT5A;IL12RB2;NFATC2;CD247;TYK2;JUN	Oligo
343	WikiPathway_2023_Human__Prostaglandin Synthesis And Regulation WP98	-0.337352	-1.82145	0.00607903	0.0625889	1	23/42	24.42%	HPGD;AKR1C1;PTGS2;PTGER4;S100A10;S100A6;AKR1C3;HPGDS;PTGDS;PTGFRN;ANXA6;ANXA1;HSD11B1;PTGS1;PTGFR;EDNRB;PTGER1;PPARGC1B;PLA2G4A;AKR1C2;PTGIS;PTGER3;PPARGC1A	Oligo
344	WikiPathway_2023_Human__5Q35 Copy Number Variation WP5380	-0.269248	-1.82121	0.00135135	0.0624562	1	41/102	27.13%	USH1C;COX7A1;EIF4E1B;SNCB;PDLIM7;PRELID1;COX8A;RGS14;TPM2;COX6A1;DOK3;GRIN1;CXCR4;MYC;MYO7B;HIGD2A;COX5B;INPP5D;GRIN2B;COX4I1;COX7C;TRIAP1;UNC5A;DBN1;COX6C;GPRIN1;NTN1;F12;SRC;COX6B1;CDHR5;COX5A;RNF44;PRR7;DDX41;COX7B;H2AX;PNPLA2;MXD3;RAB24;BABAM1	Oligo
345	GO_Biological_Process_2023__Phagocytosis (GO:0006909)	0.26472	1.81855	0	0.132824	1	22/61	16.62%	MYD88;SRPX;CD93;TLR4;HAVCR1;ITGAM;ITGB2;TGM2;LRP1;ARHGAP25;TICAM2;ITGB3;RARA;AXL;MERTK;ANXA3;TIMD4;SLC11A1;MST1R;GAS6;MSR1;MET	Oligo
346	KEGG_2021_Human__Osteoclast differentiation	0.222532	1.81851	0	0.131517	1	36/110	18.28%	LILRA2;LILRA6;FCGR1A;IFNG;NOX1;TNFRSF1A;PLCG2;FOSL2;TGFBR2;LILRB1;TNFRSF11B;LCK;ITGB3;FCGR3A;SOCS3;NFKBIA;LCP2;PPARG;CSF1;BTK;CSF1R;OSCAR;IRF9;CYBA;PIK3CD;NFKB2;SPI1;NCF1;LILRB3;TGFB2;NCF2;IL1R1;NFATC2;STAT2;TYK2;JUN	Oligo
347	WikiPathway_2023_Human__Complement Activation WP545	-0.466607	-1.81487	0.00616333	0.0651104	1	11/17	22.90%	C6;MASP1;C1QC;C9;C1QA;MASP2;C7;CFD;C8G;CFB;C1R	Oligo
348	GO_Biological_Process_2023__Detection Of Chemical Stimulus Involved In Sensory Perception Of Taste (GO:0050912)	-0.40526	-1.8146	0.00963082	0.0647387	1	14/25	22.71%	GNAT3;RTP1;TAS2R40;RTP5;PIP;TAS2R10;CA6;TAS2R39;PKD2L1;TAS2R43;GNAT2;TAS2R5;TAS2R50;LPO	Oligo
349	MSigDB_Hallmark_2020__Myogenesis	-0.236264	-1.81422	0	0.0646606	1	74/175	26.79%	PVALB;ACTN2;FKBP1B;STC2;MAPK12;COX7A1;CACNA1H;SLN;EPHB3;ACTA1;GPX3;PDLIM7;TCAP;TNNT2;CHRNG;CSRP3;IGF1;COL3A1;SPHK1;TPM2;MYBPH;CASQ1;MYH8;BHLHE40;GADD45B;MEF2C;ACTC1;PTP4A3;CAV3;FABP3;COL6A2;VIPR1;IGFBP3;SPEG;HSPB8;MYH1;CRYAB;LAMA2;OCEL1;MYL6B;CAMK2B;PFKM;SGCG;ANKRD2;COL4A2;PPFIA4;PYGM;FXYD1;MYBPC3;CFD;GABARAPL2;REEP1;ACHE;ENO3;AEBP1;ABLIM1;PLXNB2;SH3BGR;CKB;PTGIS;TPD52L1;DTNA;CKMT2;ATP6AP1;PGAM2;…	Oligo
350	GO_Cellular_Component_2023__Golgi Lumen (GO:0005796)	-0.293262	-1.809	0.00564175	0.0670051	1	39/73	29.33%	WNT7A;PDGFB;MUC12;WNT5A;LUM;HS3ST1;MUC6;MUCL1;MUC16;BGLAP;WNT4;CSPG4;NCAN;F2;NGF;FMOD;MUC17;OGN;MUC5B;PROC;F10;MMP14;BGN;CSPG5;WNT7B;WNT3;MMP16;GPC4;GPC6;OMD;F7;DCN;SDC3;GPC2;PRELP;TGFB1;AGRN;SDC2;PODXL2	Oligo
351	GO_Biological_Process_2023__Inorganic Anion Transmembrane Transport (GO:0098661)	-0.303583	-1.80679	0.00274348	0.06796	1	32/62	28.18%	SLC12A5;SLC5A8;GABRG3;APOL1;GABRA1;SLC5A1;GABRA4;SLC12A7;GABRA3;GABRG2;GLRA3;GABRB2;SLC37A4;GABRG1;SLC5A5;ANO3;GABRA2;GABRA5;GLRB;SLC12A1;SLC25A11;ANO5;SLC37A2;SLC1A1;GLRA2;GABRB3;SLC4A1;GLRA1;SLC5A6;ANO6;SLC12A8;ANO8	Oligo
352	KEGG_2021_Human__Neutrophil extracellular trap formation	0.211809	1.80559	0	0.139694	1	39/126	15.59%	TLR2;SELPLG;FCGR1A;TLR4;GP1BA;PLCG2;ITGAM;ITGB2;H2AC11;CR1;PLCB3;H2AC15;H4C14;H2BC11;CASP4;CLEC7A;CR1L;ITGB3;FCGR3A;H2AC21;H4C4;VWF;AGER;C3;SELP;H4C8;CYBA;ITGAL;PIK3CD;CYBB;NCF1;NCF2;MACROH2A2;FPR1;H2BC21;ITGA2B;H2BC18;H2BC6;SLC25A31	Oligo
353	GO_Biological_Process_2023__Positive Regulation Of Cell-Matrix Adhesion (GO:0001954)	-0.353156	-1.80527	0.00434783	0.0685183	1	20/37	29.49%	ENC1;THY1;VEGFA;CX3CL1;S100A10;FUT1;RRAS;CIB1;CCR7;KDR;NELL1;GFUS;NRG1;EFEMP2;SFRP1;UTRN;PPM1F;TEK;EMP2;CD36	Oligo
354	GO_Biological_Process_2023__Substantia Nigra Development (GO:0021762)	-0.356357	-1.80324	0.00301659	0.0690742	1	25/38	43.64%	INA;CALM3;DYNLL1;BASP1;SYNGR3;S100A1;YWHAH;FGF9;ATP5PF;SYPL2;MAOB;COX6B1;NDUFS3;HSPA5;CHKB;CALM2;PLP1;RHOA;NDRG2;CALM1;GNB4;G6PD;ATP5PB;CNP;PADI2	Oligo
355	GO_Cellular_Component_2023__Organelle Envelope Lumen (GO:0031970)	-0.304042	-1.80202	0.00588235	0.0694434	1	39/64	42.00%	PRELID1;TUBB2A;SORL1;CHCHD10;TIMM10;CMC4;CHCHD2;TRIAP1;BLOC1S1;TIMM13;NDUFB7;STOML2;ALOX5;NME4;ALPL;PRELID2;ARL2;SOD1;HTRA2;COA6;HAX1;TIMM8B;CYCS;PLAAT1;NDUFA8;TIMM8A;CHCHD5;COA7;PINK1;TIMM29;COX17;CHCHD4;ARL2BP;REXO2;DIABLO;THOP1;UQCC2;STMP1;TIMM10B	Oligo
356	GO_Biological_Process_2023__Gene Expression (GO:0010467)	-0.219115	-1.80174	0	0.0693184	1	178/284	51.30%	TESC;HHEX;EXOSC4;RPS4Y1;EEF1A2;NLRP3;SORL1;DDX25;ADAD1;TSPAN33;RPL7A;NXF3;MRPL12;ELAVL4;FAU;MRPS6;RPS26;RPL36AL;RPL41;MRPL55;ALYREF;EXOSC5;RPL18A;MRPL34;GZMA;MRPS12;RPL29;MRPL28;RPS2;CELF2;RPL27;MRPL51;RPL8;RPS18;RPS14;RPS5;DHPS;RPS15;STUB1;RPL10A;RPL18;RPL19;RPLP1;MRPL23;RPL10;ABCC6;RPS28;RPS11;MRPS17;MRPL41;RPL24;RPL26;RPL7;RPS27A;NXT1;MRPL36;RPL23A;RPL15;THOC6;RPS4X;RPL3;RPS7;RPS13;ANGPT2;RPS1…	Oligo
357	GO_Biological_Process_2023__Heart Morphogenesis (GO:0003007)	-0.329278	-1.79835	0.00570613	0.0708232	1	20/48	20.81%	MESP1;NOG;OLFM1;MESP2;HEY1;TCAP;ALPK2;VEGFA;HEYL;DYNLL1;TBX3;LEFTY1;FLRT2;HES1;HTR2B;ACVRL1;MYBPC3;CCM2L;TTN;ENG	Oligo
358	WikiPathway_2023_Human__Mitochondrial Complex III Assembly WP4921	-0.490445	-1.79766	0.00816993	0.0709258	1	11/15	40.23%	UQCR10;UQCC3;CYC1;UQCR11;UQCRQ;UQCRB;UQCRH;UQCRFS1;BCS1L;UQCRC1;UQCC2	Oligo
359	WikiPathway_2023_Human__Calcium Regulation In Cardiac Cells WP536	-0.247039	-1.79348	0.00126904	0.0725498	1	56/141	23.18%	GNG3;RGS4;FXYD2;CHRM4;GJD2;CACNB3;CAMK1;GNG13;RGS14;CASQ1;CALM3;PRKCG;CHRM1;ADRA1B;RGS19;CHRM2;ATP2B2;CACNA1S;ADCY7;YWHAH;RGS16;RGS7;CAMK4;PLN;GNG2;ADCY1;ANXA6;SLC8A3;ADRA1D;ADRA1A;GJC1;CHRM3;RGS18;ADRB2;GNG4;CAMK2B;RGS9;CACNB1;ATP2A3;GNG11;GNGT1;SLC8A1;KCNJ3;CAMK2A;KCNB1;RGS10;GJB1;CALR;GNB2;PRKAR1B;ADCY2;RGS2;ORAI1;PRKCD;KCNJ5;RGS6	Oligo
360	GO_Biological_Process_2023__Nuclear-Transcribed mRNA Catabolic Process (GO:0000956)	0.237125	1.79311	0	0.140371	1	77/83	64.14%	ZFP36;ZC3H12A;ZFP36L1;SAMD4A;PATL2;ZC3H12D;TUT1;SAMD4B;DDX5;SMG5;EXOSC9;EXOSC10;CTIF;ERI1;MTPAP;DCP1B;CNOT10;CNOT2;CNOT9;XRN1;CNOT6L;UPF2;PARN;EIF3E;CNOT11;TUT7;TUT4;RC3H2;DCP1A;TENT2;CNOT4;NBAS;RC3H1;CSDE1;THRAP3;CNOT1;DCP2;PATL1;SMG1;HBS1L;DIS3L2;GSPT1;SMG6;ATM;CNOT6;CNOT8;XRN2;TENT4B;NCBP1;CNOT7;SMG7;NBDY;RNPS1;MAGOH;UPF3A;EXOSC8;EXOSC7;PDE12;MAGOHB;UPF1;UPF3B;CNOT3;PYM1;SMG9;LSM1;RBM8A;PNRC2;…	Oligo
361	KEGG_2021_Human__Bile secretion	0.257005	1.79267	0.00735294	0.139432	1	27/65	18.81%	AQP1;AQP8;UGT1A1;ATP1A4;ABCB11;ABCC4;SLC9A3;SLC22A1;UGT2B4;UGT2B17;ABCB4;SULT2A1;ATP1A2;AQP4;ADCY4;SLC4A4;ADCY8;ABCG2;ABCC3;ABCB1;BAAT;ATP1B2;ABCC2;SLC4A5;ADCY3;ATP1B3;ADCY9	Oligo
362	GO_Biological_Process_2023__Regulation Of Interleukin-8 Production (GO:0032677)	0.259546	1.78994	0.00321543	0.139629	1	28/63	21.18%	MYD88;TLR2;LILRA2;TLR4;KLF4;NLRP10;CHI3L1;TLR3;CD33;LGALS9;TLR6;PTPRC;CLEC7A;SERPINE1;BPI;TLR1;C5AR2;CD58;SSC5D;ARRB1;PRKD2;PTPN22;FADD;NOD1;EHHADH;TIRAP;RIGI;IL17D	Oligo
363	GO_Biological_Process_2023__Negative Regulation Of Protein Serine/Threonine Kinase Activity (GO:0071901)	-0.279249	-1.78982	0.00286123	0.0743084	1	33/78	25.97%	CD300A;PYCARD;SPRY4;HHEX;CEBPA;IL1B;RGS14;SORL1;CAV3;CBLC;RASIP1;APOE;NR2F2;BMP4;UCHL1;SLC8A3;GSTP1;DUSP1;SLC8A1;GADD45A;LAX1;TESK1;PRKAR1B;HYAL2;MYOCD;RGS2;PRKCD;SPRY2;LRP5;MEN1;LYN;BMP7;HEXIM2	Oligo
364	GO_Biological_Process_2023__Peptidyl-Tyrosine Phosphorylation (GO:0018108)	0.269485	1.78945	0.00668896	0.138773	1	19/60	13.09%	FGFR3;EPHA3;PDGFRB;BLK;EFEMP1;EGFR;ABI3;FGFR4;ZAP70;JAK3;LCK;IL15;PRLR;BTK;CSF1R;FGFR1;HCK;LTK;PKDCC	Oligo
365	GO_Biological_Process_2023__Positive Regulation Of Lipid Kinase Activity (GO:0090218)	-0.388009	-1.78913	0.0091047	0.0744133	1	17/27	31.70%	KIT;PDGFRA;PDGFB;EEF1A2;NOD2;F2;FGR;TNFAIP8L3;FLT1;CCR7;CD81;IRS1;TEK;TGFB1;FLT3;PRKD1;DGKZ	Oligo
366	GO_Biological_Process_2023__Cellular Response To Salt (GO:1902075)	-0.264365	-1.78431	0.00410959	0.0767411	1	53/99	37.88%	SYT6;CACNA1H;SYT5;PDXP;EGR1;PDGFB;ITPKA;WNT5A;RASGRP2;NEUROD2;CPNE6;CHP2;SYT13;MEF2C;SYT4;GUCA1A;ADCY7;DPEP1;AKR1C3;ALOX5AP;SYT1;ADCY1;SYT10;CPNE5;CPNE7;SLC13A5;SYT7;DMTN;RASA4;SYT17;SYT3;CPNE9;MAPK13;CRHBP;CIB2;SCN5A;CPNE8;SYT2;HSP90B1;PPP1R9B;PPIF;CPNE4;CDH1;CACNA1A;DLG4;SYT15;P2RY1;SMPD1;DAXX;GPLD1;ECT2;MCOLN1;KCNH1	Oligo
367	GO_Biological_Process_2023__Sensory Perception Of Mechanical Stimulus (GO:0050954)	0.24502	1.78407	0.00347222	0.139692	1	31/77	18.32%	ROR1;MYO1A;MYO7A;SLC52A3;ATP6V0A4;GRXCR1;DCDC2;GRXCR2;GSDME;CDH23;TFAP2A;CLRN2;GRAP;BIRC5;MYO3A;CLIC5;EPS8L2;LRP2;MYO3B;EYA1;LHFPL4;WFS1;KCNE1;SLC26A4;MARVELD2;SPTBN4;USP53;PIEZO2;P2RX4;CDC14A;GRM7	Oligo
368	WikiPathway_2023_Human__ncRNAs Involved In Wnt Signaling In Hepatocellular Carcinoma WP4336	-0.286455	-1.78264	0.00409836	0.0774097	1	32/74	26.03%	WNT7A;SFRP5;WNT10B;WNT16;NOTUM;WNT5A;FZD9;SFRP2;CCND2;WNT2;WNT4;DKK1;FOSL1;MYC;SERPINF1;NKD2;FRAT2;CCND1;WIF1;FZD1;CSNK2A3;WNT7B;WNT3;DKK2;FZD6;LEF1;SFRP1;TCF7;LRP5;CSNK2B;SFRP4;TCF7L1	Oligo
369	GO_Cellular_Component_2023__Postsynaptic Density (GO:0014069)	-0.241361	-1.78092	0	0.0778485	1	84/148	42.14%	SH2D5;IQSEC3;RGS14;CDK5;SHISA8;GAP43;GRIN1;KCND1;ADGRA1;ATP2B2;TMEM108;CACNG8;INSYN2A;GRIN2B;FABP5;AKAP5;GRIN3B;GRIK1;CACNG2;SLC8A3;FOXM1;GRID2;CACNG3;INSYN1;GRM5;SLC8A1;ADGRB1;GRIN3A;KCND2;RPL8;RPS18;RPS14;GRIN2C;GRIA1;GRIK5;NETO1;SHISA9;GPER1;DAGLA;GRIN2A;NETO2;RNF112;RPL7;ADD2;SAMD14;RPS13;SIGMAR1;GRM1;MAPK8IP2;HOMER3;NSMF;PPP1R9B;ARHGAP44;RPL30;GRIN2D;RPL38;GRIA3;RPL12;RPS25;RPS27;RPLP0;RPS19…	Oligo
370	GO_Cellular_Component_2023__Axon (GO:0030424)	-0.230682	-1.78012	0.00250627	0.0777891	1	69/197	24.28%	CCK;ATOH7;SYT5;SLC18A2;OLFM1;CALB1;NEFH;ATP1A3;VSTM5;RAB3A;HCN3;CNTN1;CDK5;CPNE6;RTN4RL2;GRM2;KCNA4;CNTF;IGSF9;NEFM;LRRTM1;CALCR;SYT4;NTRK1;NEFL;RET;PRSS12;KCNA3;SCN2A;TMEM108;KCNC2;EMB;EPHB2;HCN2;ELAVL4;SYT1;PCLO;KCNC1;SLC8A3;SSNA1;TUBB3;KCNA2;SYT7;CIB1;ATCAY;EPHA4;CNTN4;NRCAM;PTPRO;SLC8A1;L1CAM;HCN1;NELL1;LRRK2;KCNB1;ALDH1A1;SCN10A;NELL2;GPER1;NTRK3;SLC1A1;UNC80;FGF13;KCNC4;EPHA5;CNTN5;VIM;SEMA…	Oligo
371	GO_Biological_Process_2023__Arachidonic Acid Metabolic Process (GO:0019369)	-0.34942	-1.77939	0.0060698	0.0779352	1	26/36	41.31%	ALOX12;PTGS2;CYP2C8;CYP1B1;CYP2A6;AWAT1;AKR1C3;PTGDS;GPX4;CYP4Z1;CYP2S1;PTGS1;DAGLA;PLA2G4A;ALOX12B;PTGIS;PLA2G4C;CBR1;PTGES2;CYP2D7;FAAH2;DAGLB;FAAH;MGLL;PTGES3;EPHX1	Oligo
372	GO_Biological_Process_2023__Release Of Sequestered Calcium Ion Into Cytosol (GO:0051209)	0.319515	1.77491	0.00859599	0.142608	1	16/33	19.23%	DRD2;GP1BA;PLCG2;PLCB3;ITPR2;LCK;PTPRC;FGF2;RYR1;HTR2C;FLNA;PLCD1;RYR2;SLC8B1;PLCE1;CLU	Oligo
373	GO_Biological_Process_2023__Regulation Of Inflammatory Response (GO:0050727)	0.189544	1.77224	0	0.143455	1	64/193	19.35%	AGTR1;MYD88;TLR2;GGT1;GPR4;TNC;TLR4;CCN4;KLF4;IL13;IFNG;NLRP10;TNFRSF1A;ELF4;TLR3;GHRL;GPSM3;SMPDL3B;PTGES;IL10RA;NLRP5;METRNL;IL15;PDE2A;CASP4;ADAMTS12;TNFAIP3;SERPINE1;NLRP14;NLRP4;NFKBIA;CDH5;MDK;MAPK7;AGER;MYO1C;PPARG;IGF2BP1;APOA1;AIM2;BCL6;SELE;BIRC3;MMP26;NINJ1;NLRC3;HCK;ENPP3;TNFAIP6;IL16;PIK3AP1;FBXL2;AGT;IL1R1;ETS1;AKNA;AOAH;NFKBIZ;TNFSF4;NAIP;C1QTNF3;SEMA7A;MVK;MFHAS1	Oligo
374	GO_Biological_Process_2023__Regulation Of MAP Kinase Activity (GO:0043405)	-0.256101	-1.77166	0.00534045	0.0820031	1	49/105	28.58%	CD300A;KIT;SPRY4;PDGFB;EDN3;IL1B;RGS14;VEGFA;SORL1;NOD2;DIRAS1;MEF2C;PIK3R5;CAV3;TNFSF11;FGF18;ADRA2A;CBLC;PIK3R6;APOE;BMP4;UCHL1;FLT1;HTR2B;GSTP1;DUSP1;LAX1;LRRK2;TRIB2;DIRAS2;NTRK3;HYAL2;TRIB1;RGS2;PRKCD;SPRY2;PPEF2;TENM1;HRAS;TPD52L1;ERP29;LYN;BMP7;RASGRP1;TGFB1;EPGN;FLT3;CD24;IRAK1	Oligo
375	GO_Biological_Process_2023__Negative Regulation Of Supramolecular Fiber Organization (GO:1902904)	-0.284466	-1.7702	0.00282087	0.082585	1	40/70	41.22%	KANK4;SPEF1;CORO1A;HSPA8;STMN2;TREM2;CAV3;EMILIN1;APOE;CRYAB;TRIM54;TWF2;CIB1;PFDN6;CHADL;PFN1;MAP2;FGF13;PFN2;PRKCD;STMN1;SSH3;TPX2;MID1IP1;PFDN2;TUBB4A;LDLR;EML2;MYADM;KATNB1;CKAP2;MAPRE1;HIP1R;NAV3;SHANK3;CLIP3;APC2;VBP1;PFDN4;PFDN5	Oligo
376	GO_Molecular_Function_2023__Potassium Ion Transmembrane Transporter Activity (GO:0015079)	-0.375638	-1.76889	0.00473186	0.0830191	1	17/29	28.16%	KCNF1;SLC12A5;KCNA1;KCNK16;KCNK3;SLC12A7;KCNK7;KCNQ4;KCNA2;TMEM38A;HCN1;ABCC9;KCNK9;KCNC4;KCNU1;KCNK1;SLC12A8	Oligo
377	GO_Molecular_Function_2023__Sodium Channel Activity (GO:0005272)	-0.356093	-1.76845	0.00911854	0.0830044	1	19/33	27.95%	HCN3;SCN2A;HCN2;SCN1A;SCN3A;ASIC4;GRIK1;SCN4B;TRPM4;ASIC3;HCN1;PKD2L1;SCN10A;GRIK5;SCN1B;SCN5A;ASIC2;SHROOM2;KCNK1	Oligo
378	GO_Biological_Process_2023__Positive Regulation Of Neuron Differentiation (GO:0045666)	-0.337039	-1.76841	0.00738552	0.0827369	1	16/39	17.65%	PCP4;NBL1;ASCL1;MMD2;VWC2;NEUROD2;DLX2;HEYL;MEF2C;DLX1;NGF;BRINP3;FGF20;HOXD3;NRCAM;ZEB1	Oligo
379	KEGG_2021_Human__Morphine addiction	-0.272568	-1.76804	0.00277008	0.0826619	1	37/87	22.88%	GNG3;GABRD;GNG13;DRD1;SLC32A1;GNG10;GABRG3;PRKCG;GABRR1;GABRA1;GABRA4;ADCY7;KCNJ6;GABRP;GABRQ;GNG2;ADCY1;GABRA3;GABRG2;PDE4A;GNG4;GABBR2;PDE3A;GABRB2;GABRG1;GNG11;GNGT1;GABRA2;GABRA5;KCNJ3;PDE1A;PDE1B;GNB2;ADCY2;GABRR2;KCNJ5;GABRB3	Oligo
380	GO_Biological_Process_2023__Regulation Of Neuron Differentiation (GO:0045664)	-0.280146	-1.76757	0.00422535	0.0823722	1	28/73	21.31%	PCP4;NBL1;ASCL1;DISP3;HEY1;HES5;MMD2;VWC2;BDNF;NEUROD2;ID2;HEYL;DKK1;TUNAR;MEF2C;SOX3;NGF;BRINP3;YWHAH;HES1;HOXD3;CNTN4;NRCAM;LRRK2;ZEB1;CALR;DTX1;NREP	Oligo
381	GO_Biological_Process_2023__Defense Response To Symbiont (GO:0140546)	0.217904	1.76522	0	0.143645	1	38/118	17.43%	SAMHD1;RSAD2;MYD88;TLR2;BCL2;DDX60;IFI44L;OAS3;APOBEC3G;PLA2G10;APOBEC3H;TLR3;DDIT4;LILRB1;OPRK1;PLSCR1;DDX60L;IFITM3;IFNA2;PTPRC;CD40;CGAS;RTP4;IFI6;IFITM2;APOBEC3A;IGF2BP1;AIM2;NLRC5;USP27X;TBKBP1;TRIM5;MX1;FADD;TRIM56;ISG20;STAT2;MOV10	Oligo
382	GO_Biological_Process_2023__Positive Regulation Of Neuron Projection Development (GO:0010976)	-0.272086	-1.7643	0.00268097	0.0835999	1	40/89	29.11%	CAMK1;WNT5A;BMP5;STMN2;BDNF;PACSIN1;NDNF;NTRK1;RET;TUBB2B;ALKAL2;PLPPR5;ALKAL1;CX3CL1;FES;APOE;ZNF804A;TOX;FZD1;RIT2;TWF2;DBN1;CAMK2B;TENM3;CAMK1D;SCARF1;NDRG4;DPYSL3;NTRK3;MUSK;PLXNB2;CUX2;SCN1B;LYN;BMP7;GPC2;PTK6;PLK5;LRP8;RELN	Oligo
383	GO_Biological_Process_2023__Positive Regulation Of Epithelial Cell Proliferation (GO:0050679)	-0.261802	-1.75855	0.00270636	0.0862645	1	55/106	32.67%	WNT7A;VIP;PDGFB;PTPRN;VEGFC;WNT5A;BMP5;CNTN1;IGF1;VEGFA;EGR3;PAX2;SEMA5A;NOD2;MYC;EGFL7;FGF10;NME2;NR4A3;RREB1;FGF9;GRN;BMP4;FGF7;HTR2B;NODAL;NME1;CCL26;KDR;NELL1;TNFSF12;NELL2;NR4A1;ANG;ZNF703;ECM1;PKHD1;SFRP1;HRAS;EMC10;SCN5A;VASH2;MEN1;TEK;EPGN;C5AR1;TGM1;LAMB1;MYDGF;BAD;PRKD1;VEGFB;PDCL3;PRKCA;ZNF580	Oligo
384	GO_Biological_Process_2023__Response To Ethanol (GO:0045471)	-0.449754	-1.75766	0.00944882	0.0862862	1	11/16	25.47%	CHRNB2;GRIN1;ADH6;GRIN2B;GRIN3A;GRIN2A;SOD1;CRHBP;GLRA2;GLRA1;OPRM1	Oligo
385	GO_Biological_Process_2023__Cellular Response To Low-Density Lipoprotein Particle Stimulus (GO:0071404)	0.374302	1.75668	0.00522193	0.147444	1	8/20	10.22%	MYD88;FCER1G;TLR4;CDH13;ITGB2;TLR6;PPARG;TICAM1	Oligo
386	GO_Molecular_Function_2023__Fibroblast Growth Factor Receptor Binding (GO:0005104)	-0.468701	-1.75578	0.00823723	0.0872508	1	9/16	16.16%	FGF10;FGF18;FGF5;FGF9;FGF7;FGF17;FGF20;KL;FGF22	Oligo
387	GO_Biological_Process_2023__Endoderm Formation (GO:0001706)	-0.378335	-1.75207	0.00969305	0.0888307	1	18/28	29.36%	MMP2;VTN;DUSP2;COL8A1;DUSP4;DUSP5;COL12A1;LAMB3;DUSP1;NODAL;COL4A2;MMP15;MMP14;ITGA4;LAMB1;COL7A1;ITGB5;ITGAV	Oligo
388	GO_Biological_Process_2023__Adenylate Cyclase-Inhibiting G Protein-Coupled Receptor Signaling Pathway (GO:0007193)	-0.321185	-1.7517	0.00881057	0.0887546	1	23/47	23.10%	CORT;CHRM4;MCHR1;HTR5A;HTR1A;FFAR3;HTR1B;MTNR1A;HRH3;CHRM1;CHRM2;ADCY7;ADRA2A;AKAP5;CHRM3;GABBR2;NPY1R;GRM4;HTR1F;HTR1D;OPRL1;AKAP12;GRM8	Oligo
389	GO_Biological_Process_2023__Cellular Response To Oxygen-Containing Compound (GO:1901701)	-0.205628	-1.75004	0	0.0894289	1	131/342	28.15%	CRYGD;PYCARD;WNT10B;DRD5;CD14;PDGFRA;CARD16;SYT6;CACNA1H;SYT5;UCP1;PDXP;EGR1;PDGFB;TESC;ITPKA;NLRP7;WNT5A;CD86;DRD1;FFAR3;IL1B;HCN3;RASGRP2;RORB;PAX2;NEUROD2;CPNE6;CHP2;PRDX5;NLRP3;WNT2;SSTR1;NOD2;SYT13;MEF2C;TSHR;SYT4;TNIP3;FOS;RET;GUCA1A;H2AZ1;NR4A3;IGFBP5;WNT9A;CX3CR1;NDUFA13;ADCY7;BRINP3;KCNC2;DPEP1;HCN2;RAMP3;AKR1C3;FES;CD274;ALOX5AP;GNG2;SYT1;ADCY1;TNFRSF1B;SYT10;GBP3;TWF2;CPNE5;CPNE7;SSTR2…	Oligo
390	GO_Biological_Process_2023__Vesicle Coating (GO:0006901)	-0.373368	-1.74258	0.00944882	0.0938291	1	28/28	62.73%	TRAPPC1;TRAPPC2L;TRAPPC2B;TRAPPC4;TRAPPC5;PREB;TRAPPC6A;TMED2;PEF1;AP3S2;PDCD6;AP3D1;TRAPPC3;AP3M2;CSNK1D;TRAPPC2;TMED10;AP3S1;TRAPPC9;KLHL12;TRAPPC10;PPP6C;TRAPPC13;TRAPPC12;CUL3;TRAPPC8;TRAPPC6B;TRAPPC11	Oligo
391	GO_Biological_Process_2023__Positive Regulation Of Pattern Recognition Receptor Signaling Pathway (GO:0062208)	0.295738	1.7396	0.00923077	0.158175	1	16/35	23.30%	RSAD2;TLR2;DDX60;LTF;TLR3;DHX58;TICAM2;TLR1;CYBA;NINJ1;PTPN22;EHHADH;MFHAS1;TIRAP;NR1H3;TRIM3	Oligo
392	GO_Molecular_Function_2023__Growth Factor Activity (GO:0008083)	-0.306513	-1.73379	0.0058651	0.0986262	1	28/53	26.63%	PDGFB;VEGFC;VEGFA;BDNF;DKK1;CNTF;FGF10;F2;NGF;FGF18;FGF5;FGF9;GRN;FGF7;FGF17;FGF20;NRTN;FGF22;CSPG5;JAG2;IL7;CLEC11A;NRG3;NRG1;PSPN;ARTN;TGFB1;EPGN	Oligo
393	GO_Biological_Process_2023__Natural Killer Cell Activation (GO:0030101)	0.346139	1.73115	0.00292398	0.16158	1	10/23	15.01%	ULBP2;ULBP3;ELF4;IFNA6;IFNA2;PTPRC;FCGR3A;IL2RB;PIK3CD;NFIL3	Oligo
394	GO_Biological_Process_2023__Regulation Of Neuron Death (GO:1901214)	-0.301488	-1.73061	0.0070922	0.100172	1	32/57	36.54%	SNCG;EGR1;TYROBP;SNCB;WNT5A;UBB;CDK5;SORL1;DKK1;MEF2C;CHGA;C1QA;GRIN2B;TNFRSF1B;CD200R1;GRID2;DHCR24;GPNMB;GRM4;LRRK2;HTRA2;SIGMAR1;NSMF;PARK7;TRAF2;DAXX;RAB29;GBA1;ATP13A2;AKT1S1;IKBKG;CHRNA7	Oligo
395	KEGG_2021_Human__Systemic lupus erythematosus	-0.28145	-1.72682	0.00410397	0.101361	1	33/69	25.37%	C6;HLA-DQB1;H3C6;CD86;H2AC7;H2BC7;H2BC15;HLA-DPB1;H4C3;HLA-DRA;ACTN1;H2AZ1;C1QC;C9;C1QA;TRIM21;GRIN2B;FCGR2A;H2BC8;HLA-DPA1;H3C12;H2BC12;H3-3B;C7;HLA-DRB1;C8G;GRIN2A;H2AC8;C1R;H2AJ;H2AX;CD80;H2AC20	Oligo
396	GO_Cellular_Component_2023__Postsynaptic Specialization Membrane (GO:0099634)	-0.333099	-1.72569	0.00916031	0.101797	1	20/38	27.65%	SLITRK3;LRRTM1;CACNG8;GRIN2B;GRIN3B;GRIK1;CACNG2;GRID2;CACNG3;GRM5;GRIN3A;GRIN2C;GRIA1;GRIK5;NETO1;DAGLA;GRIN2A;GRM1;GRIN2D;GRIA3	Oligo
397	WikiPathway_2023_Human__Metabolic Epileptic Disorders WP5355	-0.262198	-1.72424	0.00554785	0.102149	1	50/86	39.47%	LDHC;SLC25A5;LDHAL6B;GLS2;FBP2;PFKP;FBP1;SHMT2;PKLR;ASS1;PFKM;SPCS1;LDHB;ENO3;GAPDH;SLC2A5;TPI1;ALDOC;GAMT;HK1;GCK;MDH2;CPS1;LDHA;SLC25A1;GLDC;GOT1;PGAM2;SLC25A15;ENO2;ARG1;MDH1;ALDOA;ALDOB;SLC2A3;MOCS3;PGAM1;CDO1;PHGDH;SUOX;AMT;PGK1;ECHS1;GPI;ETHE1;ENO1;MPC2;PSPH;PFKL;PKM	Oligo
398	WikiPathway_2023_Human__Th17 Cell Differentiation Pathway WP5130	0.248149	1.7214	0.00980392	0.166223	1	21/60	18.28%	TBX21;IL2RA;IFNG;CD4;IRF4;ZAP70;LCK;SOCS3;PER1;NFKBIA;IL6R;IL4R;RARA;HLA-DMA;LAT;STAT5A;RORC;NFIL3;CD247;TYK2;JUN	Oligo
399	GO_Biological_Process_2023__Skeletal System Development (GO:0001501)	-0.241231	-1.71475	0.00650195	0.105837	1	54/126	26.21%	COL18A1;NOG;DLL3;DLX5;NOTUM;HES5;WNT5A;PTHLH;BMP3;BMP5;GDF10;PTH1R;IGF1;EXTL1;COL1A2;SULF1;PTGER4;BGLAP;COL10A1;AHSG;DLX6;CLEC3A;TBX3;RFLNB;LECT2;OGN;EVC;ETS2;MEPE;CHRD;VKORC1;HOXD3;OPTC;MMP14;TLL1;ALPL;MMP16;KIAA1217;PPIB;COL13A1;COL19A1;PHEX;PRDX1;HYAL2;FRZB;DDRGK1;ARSL;AKAP13;XYLT1;COL11A2;BMP7;SULF2;RPL13;PRELP	Oligo
400	KEGG_2021_Human__Toxoplasmosis	0.215701	1.71303	0	0.169416	1	28/99	15.07%	HSPA6;MYD88;HLA-DOB;TLR2;BCL2;TGFB3;TLR4;IFNG;HLA-DQA1;LAMC2;TNFRSF1A;PIK3CG;IL10RA;LAMC1;IL12A;CD40;LY96;IL10RB;NFKBIA;CIITA;LAMA5;LAMA3;HLA-DMA;BIRC3;LAMB2;TGFB2;HSPA1L;MAP2K3	Oligo
401	GO_Biological_Process_2023__Ribosome Assembly (GO:0042255)	-0.319554	-1.71294	0.0089955	0.106621	1	28/45	39.68%	MPV17L2;RPS14;RPS5;MRPS2;RPS15;C1QBP;RPL10;RPS28;RPL23A;TRAF7;RPL11;RRS1;RPSA;NGRN;EIF6;MRPS7;RPS27;RPLP0;RPS19;RPL6;SBDS;RPL5;RRP7A;PPAN;NOP53;EFNA1;MRPL20;ERAL1	Oligo
402	WikiPathway_2023_Human__Complement System In Neuronal Development And Plasticity WP5090	0.221268	1.70787	0.00398406	0.169735	1	36/95	19.92%	PARD3;C1QB;CR2;TGFB3;ATP8B3;MFGE8;IFNG;CASP10;ITGAM;ITGB2;CR1;ATP10A;CFI;PLSCR1;COLEC11;PLSCR4;ITGB3;FAS;CASP7;COLEC10;C5AR2;LLGL2;PROS1;AXL;C3;MERTK;PARD6G;TGFB2;ATP8B2;GAS6;C2;CD55;BAK1;CLU;MARK1;CSMD1	Oligo
403	GO_Biological_Process_2023__Positive Regulation Of MAPK Cascade (GO:0043410)	-0.212889	-1.70138	0.00362319	0.114085	1	118/242	34.22%	KIT;PYCARD;ADCYAP1;PDGFRA;CARTPT;PDGFB;EDN3;IL1B;GPR183;TREM2;IGF1;VEGFA;IGFBP6;PLA2G5;DOK4;NOD2;ACKR3;DOK3;DIRAS1;GFRAL;F2R;HTR2A;MEF2C;ADRA1B;CALCR;PIK3R5;FGF10;NTRK1;RET;ALKAL2;TNFSF11;ALKAL1;CX3CL1;FGF18;ADRA2A;FSHR;DDT;RAMP3;PIK3R6;APOE;TNFAIP8L3;GATA4;BMP4;ADRA1D;CAV2;RIT2;FLT1;CD74;FFAR4;ADRB2;HTR2B;NPNT;PPIA;CIB1;CXCL17;CCR7;NODAL;INAVA;CCL5;CCL26;GPNMB;KDR;GRM4;SLC30A10;NELL1;LRRK2;CD81;…	Oligo
404	GO_Biological_Process_2023__Monoatomic Cation Homeostasis (GO:0055080)	0.234042	1.70033	0.00673401	0.172516	1	22/71	15.13%	CYP27B1;CLDN16;HAMP;SLC39A5;CYP4F12;BMP6;CIB3;SLC24A4;JPH2;MT3;TRPV6;SLC12A3;SCNN1B;SCNN1A;SCNN1G;SLC39A12;ITPR3;WFS1;SLC11A1;HJV;TRPV5;LETM2	Oligo
405	WikiPathway_2023_Human__Oxysterols Derived From Cholesterol WP4545	0.277345	1.69779	0.00911854	0.17264	1	17/41	16.68%	CH25H;HSD11B2;AKR1D1;ACOT12;ACOT1;SULT2A1;ACOT6;LBP;AMACR;RORC;DHCR7;ACOT11;CYP7B1;BAAT;CYP39A1;ACOT2;ESR2	Oligo
406	GO_Biological_Process_2023__Neuron Development (GO:0048666)	-0.23267	-1.6929	0.00132802	0.118355	1	55/144	26.93%	RASGRF1;NPY;ADCYAP1;GPRIN2;ASCL1;ISL2;WNT5A;ETV1;STMN2;CDK5;MEF2C;TMEM108;LGI1;PRDM12;SH3GL2;APOE;GPM6A;MYT1L;UNC5A;BLOC1S1;GPRIN1;FLRT3;NRTN;GPRIN3;ATCAY;CNTN4;RAB13;L1CAM;INSM1;RP1;SLC44A4;ROBO2;TENM3;SNAPIN;TENM4;MAP2;SRRM4;ATP8A2;PBX4;SAMD14;PQBP1;EPHA5;RUNX1;PRMT1;TENM1;MANF;STMN1;RAB6B;BLOC1S3;LYN;B4GALT6;STMN3;TENM2;PPP1R9B;LGI4	Oligo
407	GO_Biological_Process_2023__Cytokine-Mediated Signaling Pathway (GO:0019221)	0.186258	1.68828	0.0049505	0.176893	1	49/169	15.82%	MYD88;IL1RL1;CCL2;LILRA2;DUOX2;IL2RA;FCER1G;EBI3;CD4;TNFRSF1A;IL3RA;IL15RA;PLVAP;MT3;IL34;IL17RC;IFNA6;JAK3;LILRB1;CNTFR;IFNA2;IL15;IL12A;CSF2RA;YAP1;IRAK3;NFKBIA;PRLR;IL6R;CCL24;IL4R;IL2RB;CSF1R;TNFSF18;AIM2;IL18R1;IL5RA;BIRC3;IL11RA;STAT5A;HCK;SPI1;GHR;IL13RA1;TRAF5;MX1;IL1R1;IRAK2;IL12RB2	Oligo
408	GO_Biological_Process_2023__Positive Regulation Of ERK1 And ERK2 Cascade (GO:0070374)	-0.23533	-1.68576	0.00382166	0.122468	1	53/133	23.03%	PYCARD;ADCYAP1;PDGFRA;PDGFB;GPR183;TREM2;IGF1;PLA2G5;NOD2;ACKR3;F2R;HTR2A;CALCR;FGF10;NTRK1;ALKAL2;TNFSF11;ALKAL1;CX3CL1;FSHR;DDT;RAMP3;APOE;TNFAIP8L3;GATA4;ADRA1D;CD74;FFAR4;HTR2B;TNFRSF11A;NPNT;CIB1;CXCL17;CCR7;NODAL;CCL5;CCL26;GPNMB;KDR;SLC30A10;NELL1;HLA-DRB1;CCN2;P2RY6;NECAB2;NDRG4;GPER1;NTRK3;MUSK;NRG1;PHB2;SPRY2;HRAS	Oligo
409	GO_Molecular_Function_2023__GTPase Activity (GO:0003924)	-0.209118	-1.68439	0.0011976	0.122973	1	146/251	47.27%	GNAT3;GNG3;RGS4;AGAP2;RASL10A;ARHGDIB;RND3;SEPTIN5;RAB3A;RRAS2;RHEBL1;RGS14;GNG10;GBP7;RAB3B;EEF1A2;RAC3;RAB17;DIRAS1;RGS8;RAB3C;RGS19;GNA15;RHOD;RHOBTB2;ERAS;RAB19;RGS16;RGS7;RAB38;RAB40AL;DNM1;TUBA1B;RAB27B;RASD2;RAB25;GBP3;RIT2;RGS18;GCH1;RRAS;RND1;RAC2;RGS9;SEPTIN3;SEPTIN6;GNG11;GBP6;GNGT1;GIMAP7;RAB13;LRRK2;RAN;RGS10;GNAT2;ARL2;GNB2;RAB26;DIRAS2;RHOJ;MX2;RGS2;RNF112;RAB37;RERG;NUGGC;RHOT2;HR…	Oligo
410	KEGG_2021_Human__Breast cancer	-0.232108	-1.67854	0.00932091	0.126802	1	41/134	17.59%	WNT7A;KIT;WNT10B;DLL3;WNT16;HEY1;HES5;WNT5A;FZD9;IGF1;GADD45B;WNT2;WNT4;HEYL;MYC;GADD45G;FGF10;FOS;WNT9A;TNFSF11;FGF18;FGF5;FRAT2;CCND1;FGF9;NOTCH3;FGF7;FZD1;HES1;FGF17;FGF20;WNT9B;PGR;E2F3;FGF22;GADD45A;BAX;PIK3R3;JAG2;WNT7B;WNT3	Oligo
411	GO_Molecular_Function_2023__Calcium Ion Binding (GO:0005509)	-0.203463	-1.6781	0.00119474	0.1268	1	129/271	34.43%	PCP4;PLA2G2C;SYT6;SYT5;ANXA10;PITPNM1;CALB1;SNCB;TESC;CALB2;PRSS3;MASP1;CDH4;RASGRP2;ITIH1;CPNE6;S100A2;CASQ1;PLA2G5;CHP2;GUCA1C;CALM3;VSNL1;HPCAL4;SYT13;GRIN1;PON1;EFHD2;PADI4;CDH22;SYT4;CLXN;RET;GUCA1A;DNASE1L2;NRXN1;CDH7;BAIAP3;ASPN;ANXA11;S100A6;NAALADL1;OTOF;HPGDS;SYT1;PCLO;SYT10;RPH3A;ANXA6;CDH9;MYL9;DSC1;NDUFAB1;PCDHA7;TRPM4;CDH6;SYT7;ANXA1;CIB1;S100Z;SMOC2;PAM;CALML4;SLC8A1;ASAH2;SYT17;SH…	Oligo
412	GO_Biological_Process_2023__Negative Regulation Of MAPK Cascade (GO:0043409)	-0.248989	-1.67689	0.00939597	0.127081	1	40/97	26.01%	CD300A;SPRY4;CAV1;IL1B;RGS14;DUSP2;SORL1;MYC;CAV3;CBLC;STYXL2;EPHB2;DUSP4;EMILIN1;DUSP5;APOE;BMP4;UCHL1;FOXM1;DUSP6;GSTP1;DUSP1;PPIA;EPHA4;LMO3;LAX1;WNK2;GPER1;SPRED2;HYAL2;RGS2;PRKCD;SPRY2;PPEF2;EZR;PTPRR;LYN;BMP7;DUSP26;PIK3R2	Oligo
413	GO_Biological_Process_2023__Regulation Of Neuron Apoptotic Process (GO:0043523)	-0.257904	-1.67444	0.00825309	0.128483	1	38/93	25.99%	SIX4;NUPR1;AGAP2;VSTM2L;EGR1;TOX3;NFATC4;FZD9;UBB;TREM2;CDK5;BDNF;DKK1;CNTF;PRKCG;F2R;MEF2C;NDNF;NTRK1;NGF;FOXQ1;APOE;GRN;CRLF1;GRID2;FGF20;GRM4;FOXB1;BAX;KCNB1;PTPRZ1;IL27RA;SOD1;EPHA7;SIGMAR1;PPARGC1A;NSMF;ATF4	Oligo
414	WikiPathway_2023_Human__PI3K Akt Signaling Pathway WP4172	0.167807	1.67439	0	0.187264	1	73/286	15.28%	ITGB4;PDGFD;NGFR;G6PC2;TLR2;BCL2;CDKN1A;LPAR3;GNG12;IL2RA;TNN;PDGFC;ANGPT1;TNXB;TNC;ITGA5;TLR4;FGFR3;THBS4;PDGFRB;EPHA2;LAMC2;ITGA11;ITGA10;IL3RA;LPAR4;EGFR;GNB3;HGF;FGFR4;PGF;NTF3;IFNA6;DDIT4;PIK3CG;JAK3;IFNA2;LAMC1;FGF6;LPAR5;ITGB3;COL6A1;THBS1;FGF23;PRLR;IL6R;CDK2;VWF;IL4R;EGF;IL2RB;LAMA5;EIF4EBP1;CSF1;CSF1R;COL4A1;LAMA3;FGFR1;NTRK2;PIK3CD;LPAR2;ITGA9;LAMB2;SGK1;PIK3AP1;GHR;FGF2;COL4A6;GYS1;IT…	Oligo
415	GO_Biological_Process_2023__Positive Regulation Of Response To External Stimulus (GO:0032103)	0.199933	1.67285	0	0.187738	1	43/124	18.35%	AGTR1;TLR2;EMILIN2;GPR4;TLR4;CCN4;PDGFRB;IFNG;NLRP10;BMP6;SH2D1B;SERPINF2;TNFRSF1A;TLR3;GPSM3;PLSCR1;IL15;PDE2A;CASP4;LY96;SERPINE1;THBS1;NFKBIA;MDK;MYO1C;IGF2BP1;APOH;AIM2;CYBA;NINJ1;IL16;PLAT;AGT;ETS1;FADD;P2RY12;USF1;TRIM56;RNF31;STX3;NFKBIZ;TNFSF4;NAIP	Oligo
416	GO_Molecular_Function_2023__Ribonucleoside Triphosphate Phosphatase Activity (GO:0017111)	-0.205898	-1.67011	0.00117786	0.130503	1	147/256	47.27%	GNAT3;GNG3;RGS4;AGAP2;RASL10A;ARHGDIB;RND3;SEPTIN5;RAB3A;RRAS2;RHEBL1;RGS14;GNG10;GBP7;RAB3B;EEF1A2;RAC3;RAB17;DIRAS1;RGS8;RAB3C;RGS19;GNA15;RHOD;RHOBTB2;ERAS;RAB19;RGS16;RGS7;RAB38;RAB40AL;DNM1;TUBA1B;RAB27B;RASD2;RAB25;GBP3;RIT2;RGS18;GCH1;RRAS;RND1;RAC2;RGS9;SEPTIN3;SEPTIN6;GNG11;GBP6;GNGT1;GIMAP7;RAB13;LRRK2;RAN;RGS10;GNAT2;ARL2;GNB2;RAB26;DIRAS2;RHOJ;MX2;RGS2;RNF112;RAB37;RERG;NUGGC;RHOT2;HR…	Oligo
417	GO_Molecular_Function_2023__G Protein-Coupled Receptor Binding (GO:0001664)	-0.238397	-1.66841	0.0095498	0.131309	1	40/111	20.84%	CORT;WNT7A;PNOC;PENK;GNAT3;POMC;WNT10B;RTP1;WNT16;NPB;HSPA1B;HSPA1A;RTP5;CXCL12;WNT5A;NPPA;PDYN;HSPA8;WNT2;WNT4;FCN1;NPFF;GNA15;CCDC88C;WNT9A;FZD1;WNT9B;CCL5;TUB;ARR3;WNT7B;WNT3;REEP1;BBS1;GNAT2;STUB1;C1QBP;DMBT1;NPW;REEP2	Oligo
418	GO_Biological_Process_2023__Peptidyl-Tyrosine Modification (GO:0018212)	0.259067	1.66391	0.00621118	0.188051	1	16/51	13.09%	FGFR3;EPHA3;PDGFRB;BLK;EFEMP1;EGFR;ABI3;FGFR4;ZAP70;JAK3;LCK;BTK;CSF1R;FGFR1;HCK;PKDCC	Oligo
419	GO_Cellular_Component_2023__Mitochondrial Envelope (GO:0005740)	-0.232352	-1.66341	0.00545703	0.133785	1	76/137	42.52%	CIDEA;PRELID1;FZD9;CHCHD10;TIMM10;IFI27;NDUFA13;CMC4;SLC25A4;CHCHD2;IFI27L2;TRIAP1;BLOC1S1;TIMM13;NDUFAB1;SDHD;NDUFB7;ATCAY;STOML2;LRRK2;MAOB;NME4;ALPL;NDUFA2;PRELID2;ARL2;GPER1;IKBKE;SOD1;NDUFS3;HTRA2;NAT8L;NDUFA1;TMEM14C;COA6;TMEM14A;IRGM;HAX1;ABCB6;ABCD1;NGRN;TMEM70;NDUFA6;TIMM8B;CYCS;PLA2G4C;NDUFA8;TIMM8A;BNIP3;ATP5F1B;CHCHD5;TMEM14B;COA7;ACAD11;PINK1;VDAC2;ADAP2;VPS13A;TIMM29;BOK;COX17;VDAC1…	Oligo
420	GO_Biological_Process_2023__Cellular Response To Lipid (GO:0071396)	-0.216303	-1.66083	0.00512821	0.13574	1	73/179	28.25%	PYCARD;WNT10B;CD14;CARD16;UCP1;TESC;HSPA1B;ATP1A3;NLRP7;HSPA1A;WNT5A;CD86;FFAR3;IL1B;HSPA8;TREM2;RORB;PAX2;MGARP;NLRP3;WNT2;SSTR1;NOD2;MEF2C;ADTRP;TNIP3;RET;H2AZ1;WNT9A;CX3CR1;NDUFA13;BRINP3;RAMP3;AKR1C3;FES;CD274;ADCY1;TNFRSF1B;GBP3;TWF2;SSTR2;GSTP1;WNT9B;CXCL13;SLC5A5;NR1D1;WNT7B;WNT3;MGST1;SYK;STRA8;PDCD1LG2;GPER1;SPP1;ZNF703;ADCY2;CRHBP;HTRA2;SFRP1;NUGGC;IRS1;PID1;VIM;LYN;CD80;PPM1E;IRGM;GBP2…	Oligo
421	GO_Biological_Process_2023__Extracellular Structure Organization (GO:0043062)	0.209117	1.65816	0.00819672	0.190938	1	35/92	19.41%	MATN4;ADAMTS9;MATN3;MMP11;ADAMTS5;MANSC4;COL5A3;SMOC1;SPINT1;MMP17;ADAMTS12;COL22A1;PXDN;ADAMTS10;COL17A1;COL14A1;ADAMTS3;ADAMTS18;COL15A1;COL4A1;ADAMTS6;ADAMTS17;MMP26;MMP28;THSD4;ADAMTS8;COL4A6;COL23A1;MATN2;COL5A2;ADAMTS14;TEX14;COL28A1;COL16A1;ADAMTS4	Oligo
422	GO_Biological_Process_2023__Regulation Of MAPK Cascade (GO:0043408)	-0.218868	-1.65245	0.00749064	0.141059	1	95/176	39.48%	KIT;CARTPT;CAV1;PDGFB;IL1B;IGF1;PAK6;IGFBP6;DOK4;LBH;DUSP2;DOK3;GFRAL;F2R;ADRA1B;FGF10;CAV3;RET;CX3CL1;ADRA2A;STYXL2;DUSP4;DUSP5;BMP4;ADRA1D;CAV2;RIT2;FLT1;CD74;DUSP6;ADRB2;PAK3;GSTP1;RRAS;DUSP1;PPIA;FAM83D;INAVA;KDR;GRM4;GRAP2;CD81;HLA-DRB1;JCAD;SYK;GPER1;SPRED2;SOD1;WDR54;PKHD1;ALOX12B;GREM1;PHB2;ART4;TRAF7;PTPN6;EPHA7;PPEF2;HRAS;DOK5;LYN;DUSP26;RASGRP1;DOK6;PIK3R2;TEK;ATP6AP2;LAMTOR1;FLT3;MAP4…	Oligo
423	GO_Cellular_Component_2023__Vacuolar Lumen (GO:0005775)	-0.227447	-1.64582	0.00653595	0.143242	1	83/137	44.51%	PRTN3;PYCARD;HRNR;TUBB2A;CBLIF;LUM;HSPA8;CEL;APOB;CSPG4;NCAN;GGH;FMOD;TUBB4B;OGN;DPP7;FABP5;GRN;CTSV;AZU1;CD74;TRAPPC1;BGN;NEU4;CSPG5;GPC4;GPC6;OMD;FTL;FRK;NEU1;PRKCD;CTSA;DCN;CTSC;CTSF;SDC3;CTSS;GPC2;ARG1;PRELP;CTSD;AGRN;ARSA;CHID1;SDC2;CTSL;PTGES2;IDUA;NPC2;CTSK;GLA;STK11IP;TOLLIP;RNASET2;PPT2;TCN2;GALNS;NAGLU;SMPD1;GPC3;GBA1;ATP13A2;GM2A;HSPG2;FUCA2;IDS;FUCA1;PRDX6;MANBA;PSAP;MAN2B2;LGMN;PPT1;…	Oligo
424	KEGG_2021_Human__Tuberculosis	0.189405	1.64074	0.00980392	0.19959	1	33/144	11.44%	CYP27B1;MYD88;HLA-DOB;TLR2;BCL2;TGFB3;FCER1G;FCGR1A;TLR4;IFNG;HLA-DQA1;CLEC4M;TNFRSF1A;CASP10;ITGAM;ITGB2;MRC1;CR1;IFNA6;IL10RA;ATP6V0A4;TLR6;IFNA2;IL12A;CLEC7A;CR1L;FCGR3A;IL10RB;TLR1;CIITA;C3;HLA-DMA;LBP	Oligo
425	GO_Biological_Process_2023__Canonical Wnt Signaling Pathway (GO:0060070)	-0.276799	-1.62963	0.00824176	0.155483	1	26/58	26.03%	WNT7A;SFRP5;WNT10B;CAV1;WNT16;WNT5A;FZD9;SFRP2;WNT2;WNT4;WNT9A;FRAT2;FZD1;WNT9B;NID1;LRRK2;WNT7B;WNT3;FZD6;LEF1;FRZB;SFRP1;TCF7;LRP5;SFRP4;TCF7L1	Oligo
426	GO_Biological_Process_2023__Modulation Of Chemical Synaptic Transmission (GO:0050804)	-0.227965	-1.62186	0.008	0.16171	1	53/119	29.36%	NPAS4;CPLX1;IL1B;CDK5;CHRNB2;GRM2;SYN1;NMU;CLSTN3;BEGAIN;MEF2C;UNC13A;CX3CR1;TMEM108;LGI1;BAIAP3;OTOF;NPTX1;SYT1;GRIN3B;GRIK1;CPLX2;SLC8A3;GRID2;GRM5;CPLX4;GRM4;CAMK2A;LRRK2;GRIN3A;RIMS4;GRIA1;GRIK5;DLGAP1;IQSEC2;RIMS2;NRG3;MCTP2;RIMS3;GRM6;GRM8;GRM1;MAPK8IP2;CLSTN2;DLGAP2;TPRG1L;RIMS1;NPTXR;GRIA3;LRP8;CNTNAP4;RELN;NLGN4X	Oligo
427	GO_Biological_Process_2023__Regulation Of ERK1 And ERK2 Cascade (GO:0070372)	-0.210273	-1.60995	0.00246609	0.169379	1	77/193	26.34%	PYCARD;ADCYAP1;PDGFRA;PDGFB;IL1B;GPR183;TREM2;IGF1;RGS14;PLA2G5;NOD2;ACKR3;F2R;HTR2A;CALCR;FGF10;NTRK1;ALKAL2;ALKAL1;CX3CL1;FSHR;DDT;EPHB2;RAMP3;DUSP4;EMILIN1;APOE;TNFAIP8L3;GATA4;ADRA1D;CD74;FFAR4;DUSP6;HTR2B;GSTP1;RRAS;NPNT;FAM83D;CIB1;CXCL17;CCR7;NODAL;EPHA4;CCL5;CCL26;LMO3;GPNMB;KDR;WNK2;SLC30A10;NELL1;HLA-DRB1;CCN2;SYK;P2RY6;NECAB2;NDRG4;GPER1;NTRK3;SPRED2;MUSK;PKHD1;NRG1;PHB2;SPRY2;TRAF7;PT…	Oligo
428	GO_Cellular_Component_2023__Basolateral Plasma Membrane (GO:0016323)	0.182892	1.60817	0.00456621	0.214988	1	50/155	18.35%	SLC14A1;AQP7B;AQP1;CD44;SLC38A1;MYO1A;SLC39A5;AQP8;CEACAM5;SLC22A3;ABCB11;GPIHBP1;EGFR;SLCO1C1;ABCC4;RHCG;SLC26A1;LRP1;LIN7A;SLC22A1;HEPH;ANXA2;CLDN1;VSIG1;SLC26A7;SLC22A2;SLC29A1;AQP4;SLC7A7;SLC4A4;ADCY8;ENPP1;EPCAM;ABCC3;SLC16A10;CDH17;SLC47A1;SLC6A6;EPB41;B4GALT1;SLC43A2;MARVELD2;SLC7A8;MTTP;ERBB2;NOD1;SLC16A8;ATP1B3;SLC6A9;NAIP	Oligo
429	GO_Biological_Process_2023__Ribosome Biogenesis (GO:0042254)	-0.219943	-1.60514	0.00866337	0.173257	1	103/150	54.57%	EXOSC4;RPS19BP1;EXOSC5;MRPS12;RPL27;RPS14;RPS5;RPS15;RPS28;RPS11;RPL26;RPL7;MRPL36;GLUL;RPS4X;RPS7;RPS13;RPS16;RPL11;BOP1;RPS17;BYSL;RPS23;WDR46;RPS3A;RPL26L1;RRS1;PIH1D1;TBL3;RPL35A;RPS9;PIH1D2;NOC4L;RPS25;RPS8;GRWD1;NOL6;RPS27;RPS19;EMG1;RPS15A;RPS6;SNU13;RSL24D1;WDR18;NOP16;RPL14;SBDS;WDR74;RPL5;RRP7A;RRP9;NOP53;MRTO4;NOLC1;RPS24;NOC2L;EBNA1BP2;WDR3;NIP7;POP4;UTP11;DDX54;WDR12;UTP3;DDX49;PWP2;…	Oligo
430	GO_Biological_Process_2023__mRNA Processing (GO:0006397)	-0.204374	-1.60285	0.00735294	0.173606	1	200/207	75.33%	RBMXL2;HSPA8;MBLAC1;SF3B5;ALYREF;RAMAC;SRRM4;SNRPN;SNRPD2;SF3B6;GEMIN7;U2AF1L4;DDX41;RNF113A;PPARGC1A;LSM7;LSM2;BUD31;RBM42;PIN1;SNRPB;WDR83;SNU13;LSM4;GPKOW;SRSF12;SNRPE;HEXIM1;NUDT21;LSM3;EIF4A3;SRSF2;PRPF31;GEMIN6;LSM5;SNRPA;TBRG4;PPIL1;DDX39A;SNRNP70;ZMAT2;XAB2;SRSF9;PRPF19;SRRM2;HTATSF1;IK;PHF5A;SF3B4;CWC15;DHX38;SNRPB2;SNRNP27;SYF2;NCBP2;CACTIN;PRKACA;HNRNPA1;PRPF4;SRSF8;U2AF2;RBM8A;SNIP1;S…	Oligo
431	KEGG_2021_Human__PI3K-Akt signaling pathway	0.156408	1.60229	0	0.215931	1	73/299	15.28%	ITGB4;PDGFD;NGFR;G6PC2;TLR2;BCL2;CDKN1A;LPAR3;GNG12;IL2RA;TNN;PDGFC;ANGPT1;TNXB;TNC;ITGA5;TLR4;FGFR3;THBS4;PDGFRB;EPHA2;LAMC2;ITGA11;ITGA10;IL3RA;LPAR4;EGFR;GNB3;HGF;FGFR4;PGF;NTF3;IFNA6;DDIT4;PIK3CG;JAK3;IFNA2;LAMC1;FGF6;LPAR5;ITGB3;COL6A1;THBS1;FGF23;PRLR;IL6R;CDK2;VWF;IL4R;EGF;IL2RB;LAMA5;EIF4EBP1;CSF1;CSF1R;COL4A1;LAMA3;FGFR1;NTRK2;PIK3CD;LPAR2;ITGA9;LAMB2;SGK1;PIK3AP1;GHR;FGF2;COL4A6;GYS1;IT…	Oligo
432	GO_Cellular_Component_2023__Membrane Raft (GO:0045121)	0.180407	1.60172	0.00436681	0.215605	1	41/153	14.29%	TLR2;SELPLG;ANGPT1;CD4;ATP1A4;TNFRSF1A;KCNE3;NOS1;FYB2;EGFR;PLCG2;ITGAM;ITGB2;TEX101;CR1;TGFBR2;ZAP70;PLSCR1;CAVIN2;LRP4;LCK;TLR6;PTPRC;SKAP1;ANXA2;GJA1;TLR1;FAS;LCP2;CD8A;SERPINH1;MYO1C;BTK;GP6;SELE;ADCY8;ABCG2;RAP2B;STIM1;AHNAK;MME	Oligo
433	GO_Biological_Process_2023__Positive Regulation Of Defense Response (GO:0031349)	0.203483	1.58652	0	0.224668	1	39/99	22.16%	AGTR1;TLR2;EMILIN2;GPR4;TLR4;CCN4;IFNG;NLRP10;SH2D1B;TNFRSF1A;TLR3;GPSM3;PLSCR1;IL15;PDE2A;CASP4;SERPINE1;NFKBIA;MDK;MYO1C;IGF2BP1;AIM2;CYBA;NINJ1;IL16;GRPR;AGT;ETS1;FADD;TRIM56;RNF31;NFKBIZ;TNFSF4;NAIP;TIRAP;LRSAM1;LCP1;IL17RA;POLR3G	Oligo
434	GO_Biological_Process_2023__Neuron Projection Development (GO:0031175)	-0.207194	-1.58483	0.00879397	0.182989	1	79/178	35.92%	WNT7A;RASGRF1;NPY;NEUROD6;USH1C;NBL1;ATOH7;GPRIN2;EPHB3;NEFH;UBB;STMN2;CDK5;BDNF;NEUROD2;MGARP;PACSIN1;TUNAR;TMEM108;NGF;LGI1;EPHB2;PRDM12;SH3GL2;APOE;NCKAP1L;GPM6A;UNC5A;BLOC1S1;NYAP1;PAK3;GPRIN1;FLRT3;NRTN;GPRIN3;ATCAY;EPHA4;CNTN4;RAB13;L1CAM;LRRK2;NYAP2;SNAPIN;MAP2;NMNAT2;SAMD14;DCLK1;PQBP1;PRMT1;PLXNA3;MANF;STMN1;RAB6B;VASH2;BLOC1S3;LYN;BMP7;STMN3;PPP1R9B;BICDL1;LAMB1;OLIG1;MYO16;EPHB1;CNTNAP…	Oligo
435	GO_Cellular_Component_2023__Cell-Cell Junction (GO:0005911)	0.156544	1.56545	0	0.237277	1	84/272	21.07%	PARD3;CDSN;ITGA5;KIRREL1;DSG3;CNN2;EPHA2;DSG2;CDH13;AJUBA;PDLIM3;KIAA1210;CTNNA2;FGFR4;PKP2;PDLIM1;MPP3;LIMS2;FGFRL1;LIN7A;STARD10;CDH3;TRPV4;PTPRM;ANXA2;ITGB3;GJA1;GRHL2;CLDN2;COL17A1;S100A11;JAG1;CLDN1;MICALL2;CDH5;CD53;LIMD1;PCDHGB4;TMEM47;LLGL2;GJB6;CHAF1B;TNFRSF25;FAT2;ADGRL3;DSC2;CDH17;RAP2B;PERP;CDHR3;PARD6G;AHNAK;SHROOM3;HEG1;DNMBP;B4GALT1;PTK7;SAPCD2;FLRT1;MARVELD2;SPTBN4;ARVCF;FLNA;NECT…	Oligo
436	WikiPathway_2023_Human__Measles Virus Infection WP4630	0.192464	1.56429	0.00735294	0.236799	1	40/111	24.22%	HSPA6;MYD88;TLR2;BCL2;IL2RA;TLR4;CLEC4M;OAS3;IFNA6;TP73;JAK3;IFNA2;IL12A;TNFAIP3;NFKBIA;FAS;CDK2;IL2RB;IRF9;PIK3CD;NFKB2;STAT5A;HSPA1L;MX1;FADD;RAB9B;STAT2;BAK1;TYK2;JUN;MSN;IFIH1;CCND3;RIGI;TP53;IFNAR2;STAT3;MAVS;TRADD;NFKBIB	Oligo
437	MSigDB_Hallmark_2020__Epithelial Mesenchymal Transition	-0.203685	-1.52863	0.00630517	0.217788	1	77/187	25.81%	LGALS1;SCG2;MMP2;RGS4;MGP;THBS2;CXCL12;VEGFC;THY1;WNT5A;PTHLH;LUM;VEGFA;COL3A1;BDNF;TPM2;COL1A2;CAP2;CTHRC1;ID2;GADD45B;DKK1;VCAM1;BASP1;DAB2;NT5E;COL6A2;FOXC2;FSTL1;IGFBP3;IGFBP2;FMOD;TFPI2;IGFBP4;TGFBI;IL32;COL12A1;MFAP5;ELN;CRLF1;PDLIM4;MYL9;ACTA2;LAMA2;COL5A1;CDH6;SGCG;POSTN;COL4A2;SAT1;COL8A2;GADD45A;LAMA1;MMP14;BGN;CCN2;PPIB;DPYSL3;SPP1;CAPG;ECM1;PFN2;GREM1;EFEMP2;FAP;SFRP1;OXTR;ECM2;DCN;SE…	Oligo
438	GO_Biological_Process_2023__Cellular Response To Cytokine Stimulus (GO:0071345)	0.161408	1.52243	0.00628931	0.260653	1	51/226	12.39%	ZFP36;CCL2;TLR2;LILRA2;ST3GAL6;MT1X;DUOX2;SELPLG;PYHIN1;TLR4;EBI3;ZC3H12A;MT2A;CD4;HAS2;TNFRSF1A;IL3RA;CHI3L1;IFNA6;JAK3;LILRB1;YBX3;ZFP36L1;LGALS9;IFNA2;PDE2A;CD40;ADAMTS12;SPAM1;GSDME;CSF2RA;MNDA;IRAK3;NFKBIA;IFITM2;PRLR;IL6R;CCL24;IL4R;IL2RB;SOX9;AQP4;CSF1R;CD58;AXL;AIM2;IL5RA;GBP1;IL11RA;STAT5A;HCK	Oligo
439	GO_Biological_Process_2023__Negative Regulation Of Apoptotic Process (GO:0043066)	-0.174549	-1.51122	0.00778643	0.232448	1	129/413	24.44%	VIP;CARD16;SIX4;NUPR1;ALOX12;AGAP2;ASCL1;CAV1;VSTM2L;CIDEA;TOX3;SCX;HSPA1B;HSPA1A;VTCN1;WNT5A;NFATC4;PRELID1;CD27;FZD9;TREM2;HCLS1;IGF1;VEGFA;SPHK1;EGR3;BDNF;PAX2;TMIGD1;PRDX5;CCND2;CITED2;DKK1;CNTF;PRKCG;PLK3;F2R;DAB2;MYC;MEF2C;NDNF;NTRK1;GATA1;TBX3;NME2;PRR5;PTMS;CX3CR1;FSTL1;HIGD2A;NGF;CX3CL1;CDKN2D;FOXQ1;DPEP1;ANGPTL4;PRDX2;PDPN;APOE;CDK1;NCKAP1L;GRN;CRYAB;POU3F4;GATA4;BMP4;CRLF1;PROC;AZU1;TR…	Oligo
440	GO_Biological_Process_2023__Nervous System Development (GO:0007399)	-0.173327	-1.5056	0.00564972	0.234632	1	204/401	42.49%	MESP1;NBL1;NRGN;CHAC1;ECRG4;PPP1R17;LY6H;EGR2;NOG;OLFM1;ASCL1;TRPC5;ENC1;DLX5;P2RX5;EMX1;HES5;KCNQ2;CRMP1;DRD1;FZD9;TAGLN3;VEGFA;CDK5;BDNF;NEUROD2;DOC2A;SEMA5A;CBLN1;WNT2;HPCAL4;ACTL6B;EFNB3;GFRAL;CHRM1;CXCR4;MEF2C;SDCBP2;DLX6;CHRM2;SOX3;NRXN1;CHST8;SCN2A;LGI1;GFRA2;FABP7;BRINP3;ROGDI;SOX4;FGF5;SERF1A;EPHB2;VAX1;NRSN1;PRDM12;RBFOX1;NPTX1;DPYSL5;SH3GL2;GPM6A;MYT1L;EMX2;GRIK1;DCX;ST8SIA4;CHRM3;HES1…	Oligo
441	GO_Biological_Process_2023__Positive Regulation Of Macromolecule Metabolic Process (GO:0010604)	0.148161	1.49136	0	0.277292	1	77/307	15.88%	AGTR1;CYP27B1;MYD88;TLR2;SOX11;UHRF1;ACTG2;DTX3L;ANGPT1;AMH;TNC;TLR4;KLF4;ZC3H12A;IL13;IFNG;BMP6;INHBA;TCF23;PLA2G10;TLR3;PLCG2;CTCFL;FGFR4;MT3;FOXD1;DLL4;SEC16B;ADAM19;PSG1;LILRB1;RHOXF1;PLSCR1;LGALS9;GATA2;TLR6;FGF6;CDH3;PDE2A;WNT3A;FER1L6;CLEC7A;ANXA2;GJA1;YAP1;NFKBIA;VSIR;FGF23;LAPTM5;TFAP2A;CDH5;HMGA2;EGF;MAPK7;SOX9;SLC22A2;PPARG;CSF1;TICAM1;BMPR1B;NTRK2;PIK3CD;DNMT3B;WFS1;SLC11A1;BMP2;FGF2;…	Oligo
442	MSigDB_Hallmark_2020__Interferon Gamma Response	0.484047	5.23722	0	0	0	137/177	32.48%	SOCS3;IL15;HELZ2;PIM1;IFI44L;CFB;RTP4;NLRC5;PLSCR1;OASL;GPR18;LAP3;IL6;IL4R;IFI44;ISG20;IFI35;IFITM2;USP18;STAT4;IFITM3;C1R;CDKN1A;APOL6;ZBP1;GBP4;EPSTI1;IFI27;MX2;FCGR1A;IFIT3;HIF1A;TRIM21;MX1;OAS3;ISG15;LY6E;DHX58;IFI30;IRF7;PTGS2;BST2;TAP1;RSAD2;TRIM25;MT2A;OAS2;TNFAIP3;CMPK2;FPR1;PSMB9;IFIT1;LGALS3BP;PARP14;IFIT2;NAMPT;PARP12;TRIM14;HLA-DQA1;PSMB8;MYD88;MTHFD2;PTPN2;RNF31;TOR1B;PFKP;VAMP8;PTP…	Micro
443	MSigDB_Hallmark_2020__Interferon Alpha Response	0.540591	4.85191	0	0	0	69/93	25.33%	IL15;HELZ2;GBP2;IFI44L;RTP4;PLSCR1;GMPR;OASL;LAP3;IL4R;IFI44;ISG20;IFI35;IFITM2;USP18;IFITM3;GBP4;EPSTI1;IFI27;IFIT3;TRIM21;MX1;PARP9;ISG15;LY6E;DHX58;SELL;IFI30;IRF7;BST2;TAP1;RSAD2;TRIM25;CMPK2;PSMB9;LGALS3BP;PARP14;IFIT2;TMEM140;PARP12;TRIM14;PSMB8;RNF31;MVB12A;SP110;UBE2L6;PSME2;TENT5A;HLA-C;WARS1;UBA7;HERC6;IRF1;DDX60;MOV10;TXNIP;C1S;CASP1;SAMD9L;OGFR;B2M;NMI;SAMD9;EIF2AK2;SLC25A28;IFIH1;STA…	Micro
444	GO_Biological_Process_2023__Chemical Synaptic Transmission (GO:0007268)	-0.396039	-3.82197	0	0	0	129/207	29.53%	CRH;SST;PNOC;SLC32A1;GABRA6;GRIN2C;MYCBPAP;CDK5;HTR1A;PCDHB10;CHRNB2;HTR3B;CHRNA4;CORT;CHRM2;GRM2;SYT10;NPTX2;SCN2B;KCNK3;SLC6A9;DLG3;GABRD;PCDHB14;SYT5;GAD2;SLC1A6;GABRA4;PCDHB9;CPLX1;UNC13A;HRH3;SNPH;GABRA5;HTR5A;SLC17A6;RIMBP2;HTR2C;TSPOAP1;GABBR1;GLRA3;GRIN2B;GRIN1;GRIN3A;NRXN2;PDZD11;SYN2;SNCB;RIT2;SNAP25;BSN;SLC12A5;UNC13C;GLRA2;CHRM1;KCNQ2;HTR2B;GABRG3;HTR1F;HTR2A;SYN1;GAD1;GABRG1;GLRB;GRI…	Micro
445	KEGG_2021_Human__Ribosome	-0.436927	-3.76851	0	0	0	107/129	41.28%	MRPL9;MRPL12;MRPL28;MRPL23;MRPL34;MRPL17;UBA52;RPS15;MRPL27;MRPS15;RPL26;RPL18A;MRPL10;RPS5;MRPL36;MRPL24;RPS27A;RPL19;MRPL11;RPS4Y1;MRPS12;RPL36AL;RPL39;FAU;RPL22L1;MRPS7;MRPS6;RPS4X;RPL13A;RPL41;MRPL4;RPS26;RPL22;RPL10A;RPL32;RPS10;RPS23;RPL15;RPLP2;RPL27A;RPS11;RPL38;RPL29;RPL8;RPS20;RPS3A;RPS18;RPS10-NUDT3;RPL7;RPL11;RPL7A;RPS27;RPL24;MRPS18A;MRPL2;RPL14;RPS21;MRPL14;MRPL30;RPS16;RPS14;RPL35;…	Micro
446	GO_Cellular_Component_2023__Neuron Projection (GO:0043005)	-0.327401	-3.75132	0	0	0	260/462	32.14%	PNOC;SLC32A1;ADGRB1;CALCR;GABRA6;CDK5;ZWINT;CDK5R2;CALB1;HTR1A;CHRNB2;SLC30A3;HTR3B;KCNA4;RAC3;OPRD1;CHRNA4;CHRM2;GRM2;AMIGO1;KNDC1;DCX;PCSK1;CDH13;DLG3;PLPPR1;BOC;NEFH;SRCIN1;TDO2;CPNE6;IGSF9B;GABRD;SHANK1;SYT5;RGS7BP;HCN2;GABRA4;CCK;UNC13A;CALB2;GCHFR;SSTR1;CDK5R1;HRH3;BRINP2;GABRA5;SAMD14;PLK2;KCNB1;HTR5A;KCNA3;SLC17A6;HTR2C;PRKAA2;ADCYAP1;RTN4R;SLC8A2;CPT1C;CD200;RAB39B;ATP1A3;PTK7;CAMK2A;SLC…	Micro
447	KEGG_2021_Human__Neuroactive ligand-receptor interaction	-0.410062	-3.71519	0	0	0	101/160	25.39%	CRH;NPFFR2;SST;CALCR;GABRA6;GRIN2C;HTR1A;CHRNB2;PRSS3;NMU;OPRD1;CHRNA4;TAC1;CORT;GALR1;CHRM2;GRM2;NPB;CNR1;CCKBR;F2R;GABRD;NPW;ADRA1B;TAC3;PTH1R;GABRA4;CCK;GPR83;NPY;SSTR1;P2RY13;HRH3;GABRA5;NMBR;MCHR2;P2RX5;HTR5A;HTR2C;EDNRA;ADRA2A;ADCYAP1;GNRH1;ADRA1A;GABBR1;VIP;GLRA3;GRIN2B;GRIN1;GRIN3A;CYSLTR1;ADORA1;P2RY1;MAS1;VIPR1;GLRA2;DRD1;GHR;CHRM1;SSTR2;HTR2B;GABRG3;HTR1F;HTR2A;GABRG1;GLRB;GRIK4;GABRB1…	Micro
448	WikiPathway_2023_Human__Electron Transport Chain OXPHOS System In Mitochondria WP111	-0.480695	-3.64774	0	0	0	77/88	43.29%	NDUFA7;COX7A1;NDUFA4;NDUFC2;SLC25A4;NDUFB10;COX8A;NDUFV2;COX5B;NDUFA13;ATP5IF1;UQCR11;COX6A1;ATP5MF;NDUFB3;ATP5MC3;SURF1;NDUFAB1;ATP5MC1;COX5A;ATP5PF;UQCRB;COX6B1;ATP5PO;NDUFS8;SLC25A14;UQCRFS1;COX7A2;NDUFA6;UQCRC1;ATP5F1D;COX4I1;NDUFA11;ATP5ME;SLC25A5;NDUFB7;UQCR10;NDUFB5;UQCRQ;NDUFB8;COX7C;NDUFB2;SDHD;NDUFS3;NDUFA2;ATP5F1B;UQCRH;ATP5F1E;NDUFA8;NDUFA3;NDUFA12;NDUFA9;COX6C;NDUFB4;UCP2;NDUFS5;ATP5…	Micro
449	GO_Biological_Process_2023__Anterograde Trans-Synaptic Signaling (GO:0098916)	-0.394674	-3.47731	0	0	0	82/146	24.11%	CRH;SST;PNOC;MYCBPAP;CDK5;HTR1A;PCDHB10;CHRNB2;HTR3B;CHRNA4;CORT;CHRM2;GRM2;SYT10;NPTX2;SCN2B;KCNK3;DLG3;GABRD;PCDHB14;SYT5;GAD2;SLC1A6;PCDHB9;CPLX1;HRH3;HTR5A;HTR2C;GLRA3;GRIN2B;GRIN1;NRXN2;SYN2;SNCB;RIT2;SNAP25;BSN;SLC12A5;UNC13C;GLRA2;CHRM1;KCNQ2;HTR2B;HTR1F;HTR2A;SYN1;GAD1;GLRB;GRIK4;PCDHB4;GABRB1;KIF5A;NPTX1;AMPH;GABBR2;GRIA1;GPR176;KCNN1;CHRM3;GABARAP;GRIN2A;MPZ;GRM3;SNCG;KCNA1;SYT1;GABRB2;…	Micro
450	KEGG_2021_Human__Systemic lupus erythematosus	0.436987	3.47043	0	0	0	48/70	27.39%	H2BC14;H3C10;H2AC21;H2AC16;H2AC12;H2BC9;FCGR3A;H2AC11;FCGR2A;H2BC15;H2BC12;H2BC11;H2BC4;HLA-DQB1;CD80;IL10;H2BC8;H2AC15;C1R;H2BC7;H2BC5;FCGR1A;TRIM21;H2BC21;SNRPD3;H2BC18;H2BC6;H2AC6;H4C8;HLA-DQA1;HLA-DOA;MACROH2A2;HLA-DRB5;C1QA;CD40;C1QB;C2;HLA-DMA;C5;H2AJ;C1S;C1QC;HLA-DPB1;HLA-DMB;HLA-DRB1;ACTN4;MACROH2A1;HLA-DPA1	Micro
451	KEGG_2021_Human__Nicotine addiction	-0.615586	-3.40385	0	0	0	27/32	24.81%	SLC32A1;GABRA6;GRIN2C;CHRNB2;CHRNA4;GABRD;GABRA4;GABRA5;SLC17A6;GRIN2B;GRIN1;GRIN3A;GABRG3;GABRG1;GABRB1;GABRA1;GABRA3;GABRA2;GRIA1;GRIN2A;GABRG2;SLC17A7;GABRB2;GRIA2;GABRB3;GRIA3;GRIA4	Micro
452	GO_Biological_Process_2023__Peptide Biosynthetic Process (GO:0043043)	-0.379605	-3.38932	0	0	0	112/145	42.53%	PCSK1;GSPT2;IGF2BP3;MRPL9;MRPL12;EEF1A2;MRPL28;MRPL55;CARNS1;GGT5;MRPL23;MRPL34;MRPS33;RPS15;MRPL27;MRPL43;MRPS15;RPL26;RPL18A;MRPL10;MRPL51;DHPS;RPS5;MRPL36;MRPL24;RPS27A;RPL19;MRPL11;RPS6KB2;RPS4Y1;MRPS12;RPL36AL;RPL39;FAU;MRPS7;MRPS6;RPS4X;RPL13A;RPL41;RPS26;GGTA1;RPL22;RPL10A;RPL32;RPS10;RPS23;RPL15;RPLP2;RPL27A;RPS11;RPL38;RPL29;RPL8;MRPL41;RPS20;RPS3A;RPS18;RPL7;RPL11;RPL7A;RPS27;RPL24;MRPS…	Micro
453	MSigDB_Hallmark_2020__Inflammatory Response	0.330453	3.35534	0	0	0	77/152	23.73%	IL15;TLR2;NOD2;ADGRE1;OSM;CLEC5A;IL1R1;RTP4;RGS16;OPRK1;FZD5;IL18R1;SGMS2;SERPINE1;MYC;SLC31A2;IL6;PTGIR;AQP9;IL4R;RGS1;MEP1A;IL10;TIMP1;PDPN;CDKN1A;SLC7A2;CALCRL;HBEGF;RNF144B;GPC3;HIF1A;KCNJ2;LY6E;ITGB3;PVR;SELL;IRF7;BST2;PTGER4;TACR1;NDP;FPR1;SLC7A1;OSMR;NAMPT;PLAUR;F3;CD82;SLC4A4;EMP3;SLC1A2;SLC31A1;SLC11A2;MSR1;C5AR1;ACVR1B;GCH1;MMP14;CD40;LCP2;ICAM1;BEST1;IRF1;ITGB8;STAB1;CD14;ICOSLG;EBI3;C…	Micro
454	GO_Biological_Process_2023__Defense Response To Symbiont (GO:0140546)	0.351963	3.34389	0	0	0	62/118	24.98%	TLR2;RNASE2;IFNLR1;GBP2;IFI44L;SLFN13;RTP4;AIM2;NLRC5;OPRK1;PLSCR1;OASL;DDIT4;FADD;IL6;ISG20;IFITM2;IFITM3;IFI27;MX2;IFIT3;MX1;OAS3;ISG15;GBP5;IRF7;APOBEC3F;BST2;TBKBP1;RIPK3;RSAD2;IFI6;OAS2;APOBEC3C;PYCARD;TLR8;IFIT1;IFIT2;MYD88;MICA;IKBKE;PDE12;CD40;APOBEC3G;IFIT5;IFNAR2;RNASE1;IRF1;DDX60;MOV10;RIGI;MLKL;DDX60L;LILRB1;SHFL;CASP1;STAT1;EIF2AK2;IFIH1;STAT2;TLR3;BCL2L1	Micro
455	GO_Biological_Process_2023__Mitochondrial ATP Synthesis Coupled Electron Transport (GO:0042775)	-0.480764	-3.34336	0	0	0	55/66	39.48%	NDUFA7;NDUFA4;UQCRHL;NDUFC2;NDUFB10;COX8A;NDUFV2;COX5B;COA6;UQCR11;COX6A1;NDUFB3;CYCS;NDUFAB1;COX5A;UQCRB;COX6B1;NDUFS8;CYC1;SDHAF2;UQCRFS1;COX7A2;NDUFA6;UQCRC1;COX4I1;NDUFB7;UQCR10;NDUFB5;UQCRQ;NDUFB8;COX7C;NDUFB2;SDHD;NDUFS3;NDUFA2;UQCRH;NDUFA8;NDUFAF1;NDUFA3;NDUFA12;NDUFA9;COX6C;NDUFB4;NDUFS5;COX7B;NDUFS6;NDUFS7;NDUFA1;NDUFS2;NDUFB1;NDUFC1;SDHA;NDUFA5;NDUFB6;NDUFB9	Micro
456	WikiPathway_2023_Human__Cytoplasmic Ribosomal Proteins WP477	-0.441945	-3.34124	0	0	0	72/87	40.84%	UBA52;RPS15;RPL26;RPL18A;RPS5;RPS27A;RPL19;RPS6KB2;RPS4Y1;RPS6KA6;RPL39;FAU;RPS4X;RPL13A;RPL41;RPS26;RPL22;RPL10A;RPL32;RPS10;RPS23;RPL15;RPLP2;RPL27A;RPS11;RPL38;RPL29;RPL8;RPS20;RPS3A;RPS18;RPL7;RPL11;RPL7A;RPS27;RPL24;RPL14;RPS21;RPS16;RPS14;RPL35;RPL27;RPS6;RPLP1;RPL23;RPS25;RPL3;RPS7;RPS12;RPL23A;RPS15A;RPS8;RPS13;RPL6;RPS2;RPL13;RPL28;RPL36;RPL10;RPLP0;RPL9;RPS24;RPL4;RPL34;RPS3;RPL21;RPS28…	Micro
457	GO_Biological_Process_2023__Cellular Respiration (GO:0045333)	-0.443903	-3.31104	0	0	0	66/82	41.01%	NDUFA7;NR4A3;BLOC1S1;NDUFA4;NDUFC2;NDUFB11;NDUFB10;COX8A;NDUFV2;COX5B;NDUFA13;UQCR11;COX6A1;NDUFB3;CYCS;SURF1;NDUFAB1;COX5A;MDH2;UQCRB;COX6B1;NDUFS8;CYC1;SLC25A14;ETFB;UQCRFS1;COX7A2;NDUFA6;UQCRC1;COX4I1;NDUFA11;NDUFB7;UQCR10;NDUFB5;UQCRQ;CHCHD5;NDUFB8;COX7C;NDUFB2;NDUFS3;NDUFA2;UQCRH;NDUFA8;NDUFA3;NDUFA12;NDUFA9;COX6C;NDUFB4;NDUFS5;COX7B;NDUFS6;NDUFS7;NDUFA1;NDUFS2;NDUFB1;NDUFC1;SDHA;MTLN;ME3;SD…	Micro
458	GO_Biological_Process_2023__Aerobic Electron Transport Chain (GO:0019646)	-0.472825	-3.28678	0	0	0	53/64	39.48%	NDUFA7;NDUFA4;UQCRHL;NDUFC2;NDUFB10;COX8A;NDUFV2;COX5B;UQCR11;COX6A1;NDUFB3;CYCS;NDUFAB1;COX5A;UQCRB;COX6B1;NDUFS8;CYC1;SDHAF2;UQCRFS1;COX7A2;NDUFA6;UQCRC1;COX4I1;NDUFB7;UQCR10;NDUFB5;UQCRQ;NDUFB8;COX7C;NDUFB2;SDHD;NDUFS3;NDUFA2;UQCRH;NDUFA8;NDUFAF1;NDUFA3;NDUFA9;COX6C;NDUFB4;NDUFS5;COX7B;NDUFS6;NDUFS7;NDUFA1;NDUFS2;NDUFB1;NDUFC1;SDHA;NDUFA5;NDUFB6;NDUFB9	Micro
459	GO_Molecular_Function_2023__Ligand-Gated Monoatomic Anion Channel Activity (GO:0099095)	-0.78589	-3.26818	0	0	0	15/15	21.50%	GABRA6;GABRA4;GABRA5;GLRA3;GLRA2;GABRG3;GABRG1;GLRB;GABRB1;GABRA1;GABRA3;GABRA2;GABRG2;GABRB2;GABRB3	Micro
460	GO_Biological_Process_2023__Defense Response To Virus (GO:0051607)	0.318511	3.25098	0	0	0	76/154	24.98%	TLR2;RNASE2;IFNLR1;GBP2;IFI44L;SLFN13;RTP4;AIM2;TRIM6;NLRC5;OPRK1;PLSCR1;OASL;DDIT4;FADD;IL6;ISG20;IFITM2;ZDHHC11;USP18;IFITM3;IFI27;MX2;IFIT3;TRIM21;MX1;OAS3;ISG15;GBP5;DHX58;IRF7;APOBEC3F;BST2;TBKBP1;RIPK3;USP44;RSAD2;TRIM25;IFI6;OAS2;APOBEC3C;PYCARD;TLR8;TRIM32;IFIT1;IFIT2;MYD88;MICA;IKBKE;PDE12;TRIM11;CD40;PHB2;APOBEC3G;IFIT5;IFNAR2;TRIM35;RNASE1;IRF1;DDX60;MOV10;RIGI;MLKL;DDX60L;LILRB1;SHFL;…	Micro
461	GO_Biological_Process_2023__Cytoplasmic Translation (GO:0002181)	-0.411639	-3.24759	0	0	0	73/92	40.84%	UBA52;RPS15;RPL26;RPL18A;RPS5;RPS27A;RPL19;MRPS12;RPL36AL;RPL39;FAU;RPL22L1;RPS4X;RPL13A;RPL41;RPS26;RPL22;RPL10A;RPL32;RPS10;RPS23;RPL15;RPLP2;RPL27A;RPS11;RPL38;RPL29;RPL8;RPS20;RPS3A;RPS18;RPL7;RPL11;RPL7A;RPS27;RPL24;RPL14;RPS21;RPS16;RPS14;RPL35;RPL27;RPS6;RPLP1;RPS25;RPL3;RPS7;RPL23A;RPS15A;RPS8;RPS13;EIF3I;RPL6;RPS2;RPL13;RPL28;RPL36;RPL10;RPLP0;DRG2;RPL9;RPS24;RPL4;RPL34;RWDD1;RPS3;RPL21;…	Micro
462	KEGG_2021_Human__Staphylococcus aureus infection	0.491977	3.22872	0	0	0	31/42	27.39%	FCGR2B;CFB;FPR3;FCGR3A;FCGR2A;FPR2;FCAR;HLA-DQB1;IL10;C1R;FCGR1A;FCGR2C;FPR1;CFD;HLA-DQA1;HLA-DOA;HLA-DRB5;C5AR1;C1QA;ITGAL;C1QB;ICAM1;C2;HLA-DMA;C5;C1S;C1QC;HLA-DPB1;HLA-DMB;HLA-DRB1;HLA-DPA1	Micro
463	GO_Molecular_Function_2023__Oxidoreduction-Driven Active Transmembrane Transporter Activity (GO:0015453)	-0.496457	-3.19437	0	0	0	46/52	42.18%	NDUFA7;COX7A1;NDUFA4;UQCRHL;NDUFC2;NDUFB10;COX8A;NDUFV2;COX5B;NDUFB3;COX5A;UQCRB;COX6B1;NDUFS8;NDUFA6;UQCRC1;COX4I1;NDUFB7;UQCR10;NDUFB5;NDUFB8;COX7C;NDUFB2;NDUFS3;NDUFA2;UQCRH;NDUFA8;NDUFA3;NDUFA12;NDUFA9;NDUFB4;NDUFS5;COX7B;NDUFS6;NDUFS7;NDUFA1;NDUFS2;NDUFB1;NDUFC1;CYB5A;CYB561A3;NDUFA5;NDUFB6;NDUFB9;NDUFV1;COX7A2L	Micro
464	KEGG_2021_Human__Oxidative phosphorylation	-0.396614	-3.19369	0	0	0	81/105	43.29%	NDUFA7;NDUFA4L2;ATP6V1G2;COX7A1;NDUFA4;ATP6V1F;UQCRHL;NDUFC2;NDUFB11;NDUFB10;COX8A;NDUFV2;COX5B;NDUFA13;UQCR11;COX6A1;ATP5MF;NDUFB3;ATP5MC3;NDUFAB1;ATP5MC1;COX5A;ATP5PF;UQCRB;COX6B1;ATP5PO;ATP6V0E2;NDUFS8;ATP6V1E2;CYC1;UQCRFS1;COX7A2;NDUFA6;UQCRC1;ATP5F1D;COX4I1;NDUFA11;ATP5ME;NDUFB7;UQCR10;NDUFB5;UQCRQ;NDUFB8;COX7C;NDUFB2;SDHD;NDUFS3;NDUFA2;ATP5F1B;UQCRH;ATP5F1E;NDUFA8;NDUFA3;NDUFA12;NDUFA9;COX6…	Micro
465	GO_Biological_Process_2023__Proton Motive Force-Driven ATP Synthesis (GO:0015986)	-0.471921	-3.18635	0	0	0	50/58	43.29%	NDUFA7;NDUFC2;NDUFB11;NDUFB10;NDUFV2;NDUFA13;ATP5MF;NDUFB3;ATP5MC3;NDUFAB1;ATP5MC1;ATP5PF;ATP5PO;ATP5MJ;NDUFS8;NDUFA6;ATP5F1D;NDUFA11;ATP5ME;NDUFB7;NDUFB5;NDUFB8;NDUFB2;ATP5MK;SDHD;NDUFS3;NDUFA2;ATP5F1B;ATP5F1E;NDUFA8;NDUFA3;NDUFA12;NDUFA9;NDUFB4;NDUFS5;ATP5PD;NDUFS6;NDUFS7;NDUFA1;NDUFS2;NDUFB1;NDUFC1;ATP5MG;SDHA;NDUFA5;NDUFB6;NDUFB9;NDUFV1;ATP5PB;ATP5MC2	Micro
466	GO_Cellular_Component_2023__Dendrite (GO:0030425)	-0.315137	-3.17527	0	0	0	131/240	32.14%	PNOC;SLC32A1;ADGRB1;GABRA6;CDK5;ZWINT;CALB1;HTR1A;CHRNA4;CHRM2;AMIGO1;KNDC1;SRCIN1;CPNE6;SHANK1;HCN2;GABRA4;CALB2;GCHFR;CDK5R1;HRH3;BRINP2;GABRA5;SAMD14;PLK2;KCNB1;HTR5A;HTR2C;PRKAA2;SLC8A2;CPT1C;AKAP5;SLC8A3;LAMP5;GRIN1;EPHA10;ADORA1;THY1;KCNA2;P2RY1;ATCAY;EPHA4;PPP1R9A;HSPA8;BSN;DBN1;CHRM1;HTR2B;GABRG3;HTR1F;HTR2A;MAPT;RGS14;GABRG1;PRKCG;EPHA5;DNER;KIF1A;NCDN;NSG1;ARHGAP44;SEPTIN4;GABRA1;GABRA3…	Micro
467	GO_Molecular_Function_2023__Transmitter-Gated Monoatomic Ion Channel Activity (GO:0022824)	-0.560997	-3.15346	0	0	0	26/33	24.81%	GABRA6;GRIN2C;HTR3B;GABRA4;GABRA5;GLRA3;GRIN2B;GRIN3A;GLRA2;GABRG3;GABRG1;GRIK4;GABRB1;GABRA1;GABRA3;GABRA2;GRIA1;GRIK5;GRIN2A;GABRG2;GABRB2;GRIA2;GABRB3;GRIA3;GRID1;GRIA4	Micro
468	GO_Biological_Process_2023__Proton Motive Force-Driven Mitochondrial ATP Synthesis (GO:0042776)	-0.485488	-3.13478	0	0	0	44/52	41.01%	NDUFA7;NDUFC2;NDUFB11;NDUFB10;NDUFV2;NDUFA13;ATP5MF;NDUFB3;NDUFAB1;ATP5PF;ATP5PO;NDUFS8;NDUFA6;ATP5F1D;NDUFA11;ATP5ME;NDUFB7;NDUFB5;NDUFB8;NDUFB2;SDHD;NDUFS3;NDUFA2;ATP5F1B;ATP5F1E;NDUFA8;NDUFA3;NDUFA12;NDUFA9;NDUFB4;NDUFS5;ATP5PD;NDUFS6;NDUFS7;NDUFA1;NDUFS2;NDUFB1;NDUFC1;ATP5MG;SDHA;NDUFA5;NDUFB6;NDUFB9;NDUFV1	Micro
469	GO_Biological_Process_2023__Axonogenesis (GO:0007409)	-0.35049	-3.13355	0	0	0	96/163	31.41%	BDNF;CDK5;EFNB3;EFNA4;BOC;NEFH;SEMA3E;CCK;EFNA3;LGI1;NOTCH3;TNR;CDK5R1;BRSK2;DPYSL5;KIF5C;NTNG1;SLIT2;SLITRK1;L1CAM;ROBO4;EPHA10;PAK3;TRIM46;EPHA4;SEMA5A;SEMA3C;NELL1;KIAA1755;PLPPR4;SLITRK2;RAB3A;EPHA5;LLGL1;BRSK1;B4GALT6;KIF5A;SSNA1;ENAH;EFNB2;SLITRK4;EPHB3;LRTM1;SEMA3B;ANK3;SLITRK3;MAP1A;CNTN2;SEMA3D;CXCL12;EPHA3;MAP1B;ROBO2;CNTN6;FEZ1;CNTN4;GLI2;RELN;KALRN;CYFIP2;NLGN3;EFNA5;NTNG2;PARD6B;NIBA…	Micro
470	WikiPathway_2023_Human__GABA Receptor Signaling WP4159	-0.595263	-3.12124	0	0	0	21/28	24.20%	SLC32A1;GABRA6;GABRD;GAD2;SLC6A11;GABRA4;GABRA5;GABBR1;GABRG3;GAD1;GABRG1;GABRB1;GABRA1;GABBR2;AP2S1;GABRA3;GABRA2;GABRG2;GABRB2;GABRB3;AP2M1	Micro
471	WikiPathway_2023_Human__Oxidative Phosphorylation WP623	-0.485316	-3.11457	0	0	0	45/51	43.29%	NDUFA7;NDUFA4L2;NDUFA4;NDUFC2;NDUFB10;NDUFV2;ATP5MF;ATP5MC3;NDUFAB1;ATP5MC1;ATP5PF;ATP5PO;NDUFS8;NDUFA6;ATP5F1D;NDUFA11;ATP5ME;NDUFB7;NDUFB5;NDUFB8;NDUFB2;NDUFS3;NDUFA2;ATP5F1B;ATP5F1E;NDUFA8;NDUFA3;NDUFA9;NDUFB4;NDUFS5;ATP5PD;NDUFS6;NDUFS7;NDUFS2;NDUFB1;NDUFC1;ATP5MG;ATP6AP2;NDUFA5;NDUFB6;NDUFB9;NDUFV1;ATP5PB;ATP5F1A;ATP5MC2	Micro
472	GO_Biological_Process_2023__Macromolecule Biosynthetic Process (GO:0009059)	-0.336859	-3.11367	0	0	0	125/169	43.65%	GSPT2;INHBA;IGF2BP3;MRPL9;MRPL12;EEF1A2;MRPL28;MRPL55;B4GAT1;MRPL23;MRPL34;MRPS33;TUFM;FUT9;TSFM;RPS15;MRPL27;MRPL43;MRPS15;RPL26;RPL18A;MRPL10;GAL3ST4;EIF5A2;MRPL51;DHPS;RPS5;MRPL36;MRPL24;ST3GAL4;POLD1;RPS27A;RPL19;MRPL11;RPS6KB2;RPS4Y1;COL5A1;MRPS12;RPL36AL;RPL39;FAU;MRPS7;MRPS6;RPS4X;RPL13A;POLD2;RPL41;RPS26;EEF1B2;RPL22;RPL10A;RPL32;RPS10;RPS23;RPL15;RPLP2;RPL27A;RPS11;RPL38;RPL29;RPL8;MRPL4…	Micro
473	GO_Cellular_Component_2023__Large Ribosomal Subunit (GO:0015934)	-0.494618	-3.08788	0	0	0	43/48	40.84%	RPL39L;UBA52;RPL26;RPL18A;RPL19;RPL36AL;RPL39;RPL13A;RPL41;RPL22;RPL10A;RPL32;RPL15;RPLP2;RPL27A;RPL38;RPL29;RPL8;RPL7;RPL11;RPL7A;RPL24;RPL14;RPL35;RPL27;RPLP1;RPL3;RPL23A;RPL6;RPL13;RPL28;RPL36;RPLP0;RPL9;RPL4;RPL34;RPL21;RPL7L1;RPL37A;RPL18;RPL37;RPL35A;RPL30	Micro
474	GO_Cellular_Component_2023__Cytosolic Large Ribosomal Subunit (GO:0022625)	-0.494618	-3.08788	0	0	0	43/48	40.84%	RPL39L;UBA52;RPL26;RPL18A;RPL19;RPL36AL;RPL39;RPL13A;RPL41;RPL22;RPL10A;RPL32;RPL15;RPLP2;RPL27A;RPL38;RPL29;RPL8;RPL7;RPL11;RPL7A;RPL24;RPL14;RPL35;RPL27;RPLP1;RPL3;RPL23A;RPL6;RPL13;RPL28;RPL36;RPLP0;RPL9;RPL4;RPL34;RPL21;RPL7L1;RPL37A;RPL18;RPL37;RPL35A;RPL30	Micro
475	GO_Cellular_Component_2023__Mitochondrial Respiratory Chain Complex I (GO:0005747)	-0.529441	-3.07141	0	0	0	35/39	41.01%	NDUFA7;NDUFA4;NDUFC2;NDUFB11;NDUFB10;NDUFV2;NDUFA13;NDUFB3;NDUFAB1;NDUFS8;NDUFA6;NDUFA11;NDUFB7;NDUFB5;NDUFB8;NDUFB2;NDUFS3;NDUFA2;NDUFA8;NDUFAF1;NDUFA3;NDUFA12;NDUFA9;NDUFB4;NDUFS5;NDUFS6;NDUFS7;NDUFA1;NDUFS2;NDUFB1;NDUFC1;NDUFA5;NDUFB6;NDUFB9;NDUFV1	Micro
476	GO_Cellular_Component_2023__Respiratory Chain Complex I (GO:0045271)	-0.529441	-3.07141	0	0	0	35/39	41.01%	NDUFA7;NDUFA4;NDUFC2;NDUFB11;NDUFB10;NDUFV2;NDUFA13;NDUFB3;NDUFAB1;NDUFS8;NDUFA6;NDUFA11;NDUFB7;NDUFB5;NDUFB8;NDUFB2;NDUFS3;NDUFA2;NDUFA8;NDUFAF1;NDUFA3;NDUFA12;NDUFA9;NDUFB4;NDUFS5;NDUFS6;NDUFS7;NDUFA1;NDUFS2;NDUFB1;NDUFC1;NDUFA5;NDUFB6;NDUFB9;NDUFV1	Micro
477	GO_Biological_Process_2023__Defense Response To Bacterium (GO:0042742)	0.337689	3.0209	0	0	0	51/95	25.60%	FGR;SLAMF8;SLC11A1;TLR2;RNASE2;NOD2;S100A8;S100A9;GBP2;SERPINE1;H2BC12;IL6;FPR2;H2BC11;GBP1;GNLY;H2BC8;GBP4;LYG1;OAS3;ISG15;IRGM;H2BC21;OAS2;PYCARD;COLEC12;TNFRSF14;F3;CEBPB;MYD88;MR1;MICA;RNF31;GBP3;GSDMD;PLA2G6;FCER1G;HMGB2;NLRC4;RNASE1;STAB1;SPN;SHC1;CASP1;CASP4;HLA-A;EHHADH;TREM2;TLR3;TIRAP;RPS19	Micro
478	GO_Biological_Process_2023__Axon Development (GO:0061564)	-0.405715	-3.01514	0	0	0	50/81	29.95%	CDK5;AMIGO1;NEFH;CCK;NREP;CDK5R1;BRSK2;NEUROD1;OLIG2;NTNG1;SLITRK1;L1CAM;RTN4RL2;PAK3;TRIM46;SEMA5A;OLIG1;MAPT;PLPPR4;SLITRK2;NEUROD2;RAB3A;LLGL1;BHLHE22;GAP43;BRSK1;NEUROD6;SSNA1;SLITRK4;EPHB3;ANK3;SLITRK3;MAP1A;CRTAC1;MAP1B;NMNAT2;CNTN4;PLP1;NTNG2;PARD6B;GRM7;S100A6;APLP1;SLITRK5;DCC;NRCAM;FGFR2;ATL1;APBB1;S100B	Micro
479	GO_Biological_Process_2023__Nervous System Development (GO:0007399)	-0.274322	-2.97989	0	0	0	172/351	30.06%	ADGRB1;BDNF;CDK5;FGF17;FGF5;PCDHB10;PCDH1;MESP1;EFNB3;CSPG5;GFRA1;CHRM2;DCX;PLPPR1;BOC;MET;SMPD1;EMX1;NAV2;LY6H;PCDHB14;INHBA;DPF1;PCDHB9;NRGN;SOX8;RITA1;EMX2;DPYSL4;LGI1;TRPC5;BRINP2;ASCL1;NEUROD1;DPYSL5;ACTL6B;IGF2BP3;P2RX5;FABP7;MAL;SDK2;ADGRA2;SLITRK1;FGF2;MAMDC2;MDK;IL1RAPL2;IGSF8;FUZ;MYT1L;L1CAM;CHST8;STIL;NRXN2;ADORA1;SHANK3;FLRT3;NPAS2;EGR2;CELSR1;SEMA5A;SPOCK2;ERBB3;POU3F2;SHANK2;PAFAH1B…	Micro
480	GO_Biological_Process_2023__Oxidative Phosphorylation (GO:0006119)	-0.443621	-2.97359	0	0	0	47/60	39.48%	NDUFA7;NDUFC2;NDUFB11;NDUFB10;NDUFV2;NDUFA13;ATP5MF;NDUFB3;NDUFAB1;ATP5PF;UQCRB;ATP5PO;NDUFS8;NDUFA6;UQCRC1;ATP5F1D;CHCHD10;NDUFA11;ATP5ME;NDUFB7;NDUFB5;NDUFB8;NDUFB2;SDHD;NDUFS3;NDUFA2;ATP5F1B;UQCRH;ATP5F1E;NDUFA8;NDUFA3;NDUFA12;NDUFA9;NDUFB4;NDUFS5;ATP5PD;NDUFS6;NDUFS7;NDUFA1;NDUFS2;NDUFB1;NDUFC1;ATP5MG;SDHA;NDUFA5;NDUFB6;NDUFB9	Micro
481	GO_Biological_Process_2023__Regulation Of Postsynaptic Membrane Potential (GO:0060078)	-0.58522	-2.95771	0	0	0	18/26	20.71%	GABRA6;GRIN2C;INSYN1;CHRNA4;MAPK8IP2;GABRA4;GABRA5;GRIN2B;GRIN1;GABRG3;GABRG1;GABRA1;GABRA3;GABRA2;GRIN2A;GABRG2;GSK3A;NLGN3	Micro
482	GO_Biological_Process_2023__Modulation Of Chemical Synaptic Transmission (GO:0050804)	-0.355016	-2.91734	0	0	0	64/113	29.53%	CDK5;CHRNB2;NMU;TNF;IL1B;GRM2;NPTX2;MCTP2;SLC6A9;RIMS4;BAIAP3;MAPK8IP2;CPLX1;UNC13A;LGI1;CNTNAP4;BEGAIN;FER1L5;CACNG5;SLC8A2;CAMK2A;SLC8A3;CX3CR1;GRIN3A;SNCAIP;NPTXR;DLGAP3;RIMS3;DYSF;SLC38A1;SYN1;PLPPR4;GRIK4;CLSTN2;NPTX1;CDH2;GRIA1;GRIK5;GRM3;TPRG1L;SYT1;CLSTN3;CPLX2;RELN;GRIA2;NLGN3;NLGN4X;GRM8;RIMS2;RIMS1;GRIA3;GRM7;GRID1;DLGAP1;GRM1;DGKI;GRIA4;NRG3;TMEM108;GRM5;CLN3;CHRNA7;GRID2;NLGN4Y	Micro
483	GO_Biological_Process_2023__Synapse Organization (GO:0050808)	-0.352018	-2.91587	0	0	0	71/115	32.45%	BDNF;CDK5;PCDHB10;F2R;PCDHB14;SEMA3E;PCDHB9;UNC13A;LRRC4B;NTNG1;SLC8A2;TNC;SDK2;SLITRK1;RAB39B;PTK7;SLC8A3;CX3CR1;L1CAM;NRXN2;SHANK3;PAK3;FLRT3;LRFN4;SNCB;SPOCK2;UNC13C;CX3CL1;SHANK2;DRD1;MAPT;SLITRK2;DNER;PCDHB4;CDH2;LRFN5;KY;PPFIA4;PPFIBP1;ANK3;SLITRK3;CBLN2;CNTN2;SNCG;PPFIA3;GPM6A;PTPRS;NLGN3;ADGRL3;NLGN4X;PCDHB5;PTPRF;CACNB2;PIN1;PDZRN3;NRXN1;PPFIA2;MUSK;CTNND2;APBB2;CHCHD10;GRM5;NRCAM;CACNB1…	Micro
484	GO_Biological_Process_2023__Mitochondrial Electron Transport, NADH To Ubiquinone (GO:0006120)	-0.51931	-2.86595	0	0	0	30/34	41.01%	NDUFA7;NDUFA4;NDUFC2;NDUFB10;NDUFV2;NDUFB3;NDUFAB1;NDUFS8;NDUFA6;NDUFB7;NDUFB5;NDUFB8;NDUFB2;NDUFS3;NDUFA2;NDUFA8;NDUFAF1;NDUFA3;NDUFA9;NDUFB4;NDUFS5;NDUFS6;NDUFS7;NDUFS2;NDUFB1;NDUFC1;NDUFA5;NDUFB6;NDUFB9;NDUFV1	Micro
485	GO_Molecular_Function_2023__NADH Dehydrogenase (Quinone) Activity (GO:0050136)	-0.519348	-2.8485	0	0	0	30/34	41.01%	NDUFA7;NDUFA4;NDUFC2;NDUFB10;NDUFV2;NQO1;NDUFB3;NDUFS8;NDUFA6;NDUFB7;NDUFB5;NDUFB8;NDUFB2;NDUFS3;NDUFA2;NDUFA8;NDUFA3;NDUFA12;NDUFA9;NDUFB4;NDUFS5;NDUFS6;NDUFS7;NDUFS2;NDUFB1;NDUFC1;NDUFA5;NDUFB6;NDUFB9;NDUFV1	Micro
486	GO_Biological_Process_2023__Negative Regulation Of Viral Process (GO:0048525)	0.405507	2.83111	0	0.00107137	0.007	28/49	24.21%	TRIM6;PLSCR1;OASL;ISG20;IFITM2;IFITM3;TRIM21;MX1;OAS3;ISG15;APOBEC3F;BST2;ZFP36;RSAD2;OAS2;APOBEC3C;TRIM32;IFIT1;TRIM14;TRIM11;APOBEC3G;IFIT5;ZC3HAV1;SHFL;STAT1;EIF2AK2;TRIM62;IFIH1	Micro
487	GO_Biological_Process_2023__Translation (GO:0006412)	-0.286978	-2.82166	0	2.05368e-05	0.001	156/223	45.36%	GSPT2;NDUFA7;MRPL54;IGF2BP3;MRPL9;MRPL12;MARS2;MRPL40;EEF1A2;MRPL28;MRPL55;AURKAIP1;GADD45GIP1;MRPL23;MRPL34;MRPS33;TUFM;TSFM;MRPL17;UBA52;APEH;RPS15;MRPL27;MRPL43;MRPS15;RPL26;RPL18A;MRPL10;CHCHD1;EIF5A2;MRPL51;DHPS;RPS5;MRPL36;MRPL24;RPS27A;RPL19;MRPL11;RPS6KB2;MRPS28;RPS4Y1;MRPS12;RPL36AL;RPL39;FAU;RPL22L1;MRPS7;MRPS6;RPS4X;RPL13A;RPL41;MRPL4;RPS26;EEF1B2;RPL22;RPL10A;RPL32;RPS10;RPS23;RPL15;R…	Micro
488	GO_Molecular_Function_2023__NADH Dehydrogenase (Ubiquinone) Activity (GO:0008137)	-0.516725	-2.81712	0	1.99964e-05	0.001	29/33	41.01%	NDUFA7;NDUFA4;NDUFC2;NDUFB10;NDUFV2;NDUFB3;NDUFS8;NDUFA6;NDUFB7;NDUFB5;NDUFB8;NDUFB2;NDUFS3;NDUFA2;NDUFA8;NDUFA3;NDUFA12;NDUFA9;NDUFB4;NDUFS5;NDUFS6;NDUFS7;NDUFS2;NDUFB1;NDUFC1;NDUFA5;NDUFB6;NDUFB9;NDUFV1	Micro
489	GO_Biological_Process_2023__Gamma-Aminobutyric Acid Signaling Pathway (GO:0007214)	-0.651356	-2.80983	0	1.94837e-05	0.001	14/17	21.50%	GABRA6;SHISA7;GABRA4;GABRA5;GABRG3;GABRG1;GABRB1;GABRA1;GABBR2;GABRA3;GABRA2;GABRG2;GABRB2;GABRB3	Micro
490	KEGG_2021_Human__Allograft rejection	0.541484	2.80897	0	0.000964237	0.007	19/22	29.14%	HLA-DQB1;CD80;IL10;HLA-DQA1;HLA-DOA;HLA-DRB5;HLA-F;CD40;HLA-B;HLA-C;HLA-DMA;FAS;HLA-A;HLA-DPB1;HLA-DMB;HLA-DRB1;HLA-DPA1;CD86;HLA-E	Micro
491	KEGG_2021_Human__Neutrophil extracellular trap formation	0.290225	2.80735	0	0.00087658	0.007	53/126	21.68%	TLR2;H2BC14;H3C10;H2AC21;MAPK11;H2AC16;H2AC12;FPR3;H2BC9;FCGR3A;H2AC11;FCGR2A;H2BC15;H2BC12;FPR2;AQP9;H2BC11;H2BC4;PIK3R2;CR1;H2BC8;H2AC15;H2BC7;CR1L;H2BC5;FCGR1A;PIK3R3;ITGB3;H2BC21;MAPK13;H2BC18;SIGLEC9;FPR1;TLR8;H2BC6;H2AC6;H4C8;PPIF;HDAC4;MACROH2A2;RAC2;C5AR1;GSDMD;HDAC11;ITGAL;NCF4;C5;H2AJ;AKT1;CASP1;CASP4;HDAC6;HDAC7	Micro
492	GO_Biological_Process_2023__G Protein-Coupled Receptor Signaling Pathway, Coupled To Cyclic Nucleotide Second Messenger (GO:0007187)	-0.508031	-2.80143	0	1.89966e-05	0.001	21/32	18.67%	HTR1A;CCL2;OPRD1;CHRM2;CNR1;PTH1R;NPY;HRH3;ANXA1;HTR5A;HTR2C;VIPR1;DRD1;CHRM1;HTR2B;HTR1F;HTR2A;CHRM3;TSHR;NPY1R;HTR4	Micro
493	GO_Cellular_Component_2023__Postsynaptic Density (GO:0014069)	-0.312459	-2.78653	0	3.70665e-05	0.002	83/144	32.84%	ADGRB1;GRIN2C;CDK5;INSYN1;ADGRA1;DLG3;SRCIN1;SHANK1;SHISA7;CACNG8;MAPK8IP2;CACNG2;CDK5R1;RNF112;SH2D5;SAMD14;CACNG7;CACNG5;SLC8A2;AKAP5;SLC8A3;GRIN2B;GRIN1;GRIN3A;SHANK3;P2RY1;CACNG3;NETO1;PPP1R9A;SHANK2;LZTS3;RGS14;PLPPR4;GRIK4;GAP43;ARHGAP44;ADD2;SHISA6;CDH2;ATP2B2;SCRIB;GRIA1;SIGMAR1;GRIK5;GRIN2A;SHISA9;KCND2;DNAJC6;GRIA2;PTPRS;KALRN;SPOCK1;GRIA3;LRRC7;GRID1;FABP5;CTNND2;GRM1;HIP1R;GRIA4;HOMER…	Micro
494	KEGG_2021_Human__Epstein-Barr virus infection	0.266539	2.77562	0	0.000803531	0.007	86/171	29.92%	TLR2;JAK3;GADD45B;MAPK11;CCNA1;FADD;MYC;IL6;CD44;E2F1;PIK3R2;HLA-DQB1;RUNX3;CDKN1A;PIK3R3;OAS3;ISG15;CD247;MAPK13;IRF7;SAP30;TAP1;TRADD;CDK2;OAS2;TNFAIP3;ENTPD3;MAP2K3;NFKB2;HLA-DQA1;BAK1;MYD88;HLA-DOA;NFKBIB;HLA-DRB5;HLA-F;IKBKE;IRAK1;IKBKG;NFKBIE;CD58;CCND3;CD40;HLA-B;MAPK10;TAP2;RELB;ITGAL;CCND1;IFNAR2;HLA-C;ICAM1;HLA-DMA;BAX;VIM;AKT1;FAS;HLA-A;NFKBIA;STAT1;PSMD14;RBPJ;B2M;TYK2;EIF2AK2;HDAC1;S…	Micro
495	GO_Biological_Process_2023__Positive Regulation Of Synaptic Transmission (GO:0050806)	-0.390375	-2.77077	0	3.6184e-05	0.002	36/68	21.80%	GRIN2C;CCL2;NMU;TNF;STX1B;RIMS4;BAIAP3;SHISA7;ZDHHC12;CACNG8;CACNG2;LGI1;CACNG7;PLK2;CACNG5;SLC8A2;AKAP5;SLC8A3;GRIN2B;GRIN1;SHANK3;CACNG3;RIMS3;SHANK2;DRD1;RGS14;CLSTN2;GRIN2A;SLC24A2;SYT1;CLSTN3;VAMP2;RELN;NLGN3;RIMS2;RIMS1	Micro
496	KEGG_2021_Human__Parkinson disease	-0.285877	-2.76856	0	3.53425e-05	0.002	141/211	44.47%	NDUFA7;NDUFA4L2;KIF5C;TUBA4A;CAMK2A;SNCAIP;CAMK2B;MAOB;TUBB2A;TUBB4A;PSMA8;COX7A1;NDUFA4;KLC2;DRD1;MAPT;UQCRHL;NDUFC2;SLC18A1;UBB;SLC25A4;PSMC3;NDUFB11;NDUFB10;KIF5A;COX8A;UCHL1;CALM3;NDUFV2;COX5B;NDUFA13;UBA52;CALM1;UQCR11;COX6A1;NDUFB3;PSMD8;CYCS;ATP5MC3;RPS27A;NDUFAB1;DDIT3;ATP5MC1;COX5A;TUBB2B;PSMA2;ATP5PF;PSMB5;UQCRB;COX6B1;TXN;ATP5PO;TUBA1A;NDUFS8;CYC1;PSMB6;GNAL;UQCRFS1;COX7A2;CALM2;MAOA;T…	Micro
497	KEGG_2021_Human__Complement and coagulation cascades	0.415211	2.76484	0	0.000953641	0.009	25/42	22.13%	F13A1;THBD;CFB;SERPINE1;VSIG4;TFPI;CR1;C1R;SERPINA1;CR1L;CFD;PLAUR;F3;C5AR1;C1QA;SERPINF2;SERPING1;C1QB;C2;PROS1;C5;CD55;C1S;C1QC;F8	Micro
498	GO_Molecular_Function_2023__Hydrolase Activity, Hydrolyzing O-glycosyl Compounds (GO:0004553)	0.522883	2.76147	0	0.000885524	0.009	18/24	26.09%	CHI3L1;CHIT1;CHI3L2;ACER3;HPSE2;OVGP1;GBA1;HPSE;IDUA;GLA;ACER2;GALC;MOGS;ADPRS;NEU3;HEXD;GUSB;GBA2	Micro
499	KEGG_2021_Human__Autoimmune thyroid disease	0.517773	2.75694	0	0.000918321	0.01	20/24	29.14%	HLA-DQB1;CD80;IL10;TG;HLA-DQA1;HLA-DOA;HLA-DRB5;HLA-F;CD40;HLA-B;HLA-C;HLA-DMA;FAS;HLA-A;HLA-DPB1;HLA-DMB;HLA-DRB1;HLA-DPA1;CD86;HLA-E	Micro
500	GO_Biological_Process_2023__Cellular Response To Type I Interferon (GO:0071357)	0.523565	2.74452	0	0.000860926	0.01	19/22	35.79%	IFITM2;IFITM3;IFI27;TBKBP1;OAS2;IFIT1;MYD88;HDAC4;IKBKE;IRAK1;IFNAR2;STAT1;TYK2;STAT2;SP100;TRAF3;MAVS;IFNAR1;TANK	Micro
501	GO_Biological_Process_2023__Aerobic Respiration (GO:0009060)	-0.417023	-2.74206	0	3.45392e-05	0.002	44/57	41.01%	NDUFA7;BLOC1S1;NDUFC2;NDUFB11;NDUFB10;NDUFV2;NDUFA13;NDUFB3;SURF1;NDUFAB1;MDH2;UQCRB;NDUFS8;SLC25A14;NDUFA6;UQCRC1;ATP5F1D;CHCHD10;NDUFA11;NDUFB7;NDUFB5;NDUFB8;NDUFB2;NDUFS3;NDUFA2;UQCRH;NDUFA8;NDUFA3;NDUFA12;NDUFA9;NDUFB4;NDUFS5;NDUFS6;NDUFS7;NDUFA1;NDUFS2;NDUFB1;NDUFC1;ME3;MTFR1L;NDUFA5;NDUFB6;NDUFB9;NDUFV1	Micro
502	GO_Cellular_Component_2023__Axon (GO:0030424)	-0.289983	-2.73711	0	5.06576e-05	0.003	97/183	32.06%	CALCR;CDK5;ATP2B3;CALB1;KCNA4;GRM2;BOC;NEFH;SRCIN1;CPNE6;SYT5;HCN2;CCK;CDK5R1;KCNB1;KCNA3;PRKAA2;SLC8A2;CPT1C;CD200;ATP1A3;PTK7;SLC8A3;NEFM;L1CAM;ROBO4;NFIB;RTN4RL2;SYT7;KCNA2;LRRTM1;ATCAY;EPHA4;BSN;MAPT;NELL1;RAB3A;EPHA5;ALDH1A1;LLGL1;KIF1A;NCDN;CLDN11;SCN2A;SSNA1;SEPTIN4;HCN1;OLFM1;SYT4;MAP1A;GRM3;CNTN2;NEFL;SYT1;TNFRSF25;ADAM22;KCNC2;LRP2;MAP1B;CNTN6;GSK3A;FEZ1;CNTN4;UNC80;PTPRS;ADGRL3;BAG2;SC…	Micro
503	GO_Molecular_Function_2023__GABA Receptor Activity (GO:0016917)	-0.654742	-2.73388	0	4.95563e-05	0.003	14/16	21.50%	GABRA6;GABRD;GABRA4;GABRA5;GABRG3;GABRG1;GABRB1;GABRA1;GABBR2;GABRA3;GABRA2;GABRG2;GABRB2;GABRB3	Micro
504	GO_Cellular_Component_2023__Exocytic Vesicle Membrane (GO:0099501)	-0.430335	-2.73203	0	4.85019e-05	0.003	27/48	20.39%	SLC32A1;SV2C;MCTP2;RAB3B;SYT5;SYNGR3;UNC13A;RAB26;FER1L5;SLC17A6;SV2A;SYN2;DYSF;UNC13C;SYN1;RPH3A;SLC18A1;GABRA2;SYT4;SV2B;SYNPR;SYP;SYT1;SLC17A7;VAMP2;CLTB;PTPRS	Micro
505	GO_Biological_Process_2023__Neurotransmitter Secretion (GO:0007269)	-0.459138	-2.72392	0	9.49829e-05	0.005	29/41	28.66%	SLC32A1;CDK5;SYT10;DOC2B;CPLX1;UNC13A;HRH3;SNPH;STX1A;NRXN2;PDZD11;SYN2;SNAP25;SYN1;RAB3A;RPH3A;LIN7B;PPFIA3;SYT1;VAMP2;CPLX2;RIMS2;STXBP1;RIMS1;NRXN1;LIN7A;RPH3AL;PTPRN2;DOC2A	Micro
506	WikiPathway_2023_Human__Complement System WP2806	0.379485	2.72107	0	0.000891312	0.011	28/52	22.18%	TLR2;F13A1;CFB;CD93;FCGR3A;VSIG4;THBS1;ITGA2;CR1;SPP1;ITGB3;SELL;FPR1;CFD;LAMC1;PLAUR;C5AR1;FKBP2;SERPING1;CD40;ICAM1;C2;C5AR2;PROS1;C5;CD55;C1S;WAS	Micro
507	GO_Biological_Process_2023__Interferon-Mediated Signaling Pathway (GO:0140888)	0.484589	2.71683	0	0.000841795	0.011	25/28	41.34%	IFNLR1;IFITM2;IFITM3;IFI27;TBKBP1;OAS2;IL10RB;MYD88;HDAC4;IKBKE;IRAK1;IFNAR2;IRF1;STAT1;TYK2;STAT2;SP100;TRAF3;MAVS;IFNAR1;TANK;IFNGR2;HCK;TBK1;JAK2	Micro
508	GO_Biological_Process_2023__Neuron Projection Guidance (GO:0097485)	-0.333046	-2.69564	0	0.000108552	0.006	62/107	31.02%	BDNF;EFNB3;EFNA4;BOC;SEMA3E;EFNA3;LGI1;NOTCH3;TNR;CDK5R1;DPYSL5;KIF5C;SLIT2;L1CAM;ROBO4;EPHA10;EPHA4;SEMA5A;SEMA3C;NELL1;KIAA1755;EPHA5;KIF5A;ENAH;EFNB2;EPHB3;LRTM1;SEMA3B;CNTN2;SEMA3D;CXCL12;EPHA3;ROBO2;CNTN6;FEZ1;CNTN4;GLI2;RELN;KALRN;CYFIP2;EFNA5;NIBAN2;EPHB6;SEMA4F;NRXN1;DAG1;CNTN1;DCC;ROBO3;EPHA7;FYN;NELL2;NRCAM;UNC5C;NFASC;CNTN5;NEXN;SEMA6C;SEMA7A;NRXN3;RPS6KA5;SLIT1	Micro
509	GO_Molecular_Function_2023__Hormone Activity (GO:0005179)	-0.548155	-2.68841	0	0.000106381	0.006	14/23	10.94%	CRH;SST;PNOC;PTHLH;VGF;CORT;INHBA;CCK;NPY;NPPA;IGF1;GNRH1;VIP;CHGB	Micro
510	GO_Cellular_Component_2023__Dendrite Membrane (GO:0032590)	-0.530296	-2.68527	0	0.000104295	0.006	18/26	18.25%	GABRA6;SHISA7;GABRA4;GABRA5;KCNB1;LAMP5;THY1;GABRG3;GABRG1;SHISA6;GABRA1;GABRA3;GABRA2;ATP2B2;GRIA1;GABRG2;SHISA9;KCNC2	Micro
511	GO_Biological_Process_2023__Regulation Of Synaptic Transmission, Glutamatergic (GO:0051966)	-0.411039	-2.6686	0	0.000116902	0.006	30/50	24.42%	GRIN2C;CDK5;CCL2;TNF;GRM2;CACNG8;MAPK8IP2;UNC13A;CACNG2;CACNG7;CACNG5;GRIN2B;GRIN1;SHANK3;CACNG3;DRD1;PLPPR4;HCN1;CDH2;GRIN2A;GRM3;TPRG1L;SYT1;RELN;NLGN3;GRM8;GRM7;NRXN1;GRM1;DGKI	Micro
512	GO_Biological_Process_2023__Type I Interferon-Mediated Signaling Pathway (GO:0060337)	0.516936	2.66822	0	0.00188498	0.024	18/21	35.79%	IFITM2;IFITM3;IFI27;TBKBP1;OAS2;MYD88;HDAC4;IKBKE;IRAK1;IFNAR2;STAT1;TYK2;STAT2;SP100;TRAF3;MAVS;IFNAR1;TANK	Micro
513	GO_Cellular_Component_2023__Synaptic Vesicle Membrane (GO:0030672)	-0.418385	-2.66747	0	0.000114696	0.006	27/49	20.39%	SLC32A1;SV2C;MCTP2;RAB3B;SYT5;SYNGR3;UNC13A;RAB26;FER1L5;SLC17A6;SV2A;SYN2;DYSF;UNC13C;SYN1;RPH3A;SLC18A1;GABRA2;SYT4;SV2B;SYNPR;SYP;SYT1;SLC17A7;VAMP2;CLTB;PTPRS	Micro
514	MSigDB_Hallmark_2020__TNF-alpha Signaling via NF-kB	0.252804	2.66601	0	0.00179073	0.024	69/173	19.39%	SOCS3;TLR2;BCL2A1;MAP3K8;BCL3;GADD45B;BCL6;FOSL2;SLC2A3;SDC4;DUSP5;SERPINE1;MYC;GEM;IL6;CD44;SLC2A6;GFPT2;VEGFA;PLPP3;YRDC;EHD1;CD80;CDKN1A;KLF4;HBEGF;EFNA1;CEBPD;FOS;ATF3;FOSL1;SPSB1;PER1;PTGS2;TGIF1;TAP1;DUSP4;PTGER4;SLC16A6;SERPINB8;NFIL3;ZFP36;DUSP1;TNFAIP3;BHLHE40;TRAF1;IFIT2;NAMPT;IER5;PLAUR;F3;CEBPB;MAP2K3;NFKB2;ID2;MAFF;GCH1;LITAF;B4GALT5;NFKBIE;STAT5A;RELB;CCND1;MCL1;ICAM1;TNFAIP2;DRAM1;…	Micro
515	GO_Cellular_Component_2023__Postsynaptic Specialization Membrane (GO:0099634)	-0.454934	-2.66233	0	0.000112572	0.006	26/37	29.43%	GRIN2C;DLG3;CACNG8;CACNG2;CACNG7;CACNG5;GRIN2B;GRIN3A;CACNG3;NETO1;LRRTM1;PLPPR4;GRIK4;LRRTM2;GRIA1;GRIK5;GRIN2A;SLITRK3;GRIA2;PTPRS;GRIA3;GRID1;GRM1;GRIA4;GRM5;GRID2	Micro
516	WikiPathway_2023_Human__Vitamin D Receptor Pathway WP2877	0.293566	2.63023	0	0.0022958	0.032	49/106	22.33%	VDR;TNFRSF11B;S100A8;SULT1C2;TREM1;S100A9;THBD;BMP6;BCL6;GXYLT2;MYC;CEACAM1;TNFSF4;CASP5;IGFBP5;HILPDA;TIMP3;SPP1;SOSTDC1;CDKN1A;KLF4;TGFB2;MX2;KLK6;CYP2S1;ADGRE5;HIF1A;DND1;PTGER4;CDK2;TNFAIP3;CDKN2B;HLA-DQA1;G6PD;ABCB1;DUSP10;CD40;LRRC8A;ABCD1;ID4;CCND1;LRRC25;CRACR2A;PPARD;CD14;PRKCQ;CLPTM1L;LGALS9;STS	Micro
517	WikiPathway_2023_Human__Complement And Coagulation Cascades WP558	0.427677	2.61926	0	0.00231667	0.033	21/34	22.13%	THBD;CFB;SERPINE1;TFPI;CR1;C1R;SERPINA1;CFD;PLAUR;F3;C5AR1;C1QA;SERPINF2;SERPING1;C1QB;C2;PROS1;CD55;C1S;C1QC;F8	Micro
518	GO_Biological_Process_2023__Modulation Of Excitatory Postsynaptic Potential (GO:0098815)	-0.493347	-2.60778	0	0.000234867	0.012	21/29	28.75%	GRIN2C;STX1B;SHANK1;SLC8A2;SLC8A3;GRIN2B;GRIN1;SHANK3;NETO1;TMEM25;CUX2;GRIN2A;RELN;NLGN3;NLGN4X;RIMS2;RIMS1;NRXN1;TMEM108;PRKCZ;CHRNA7	Micro
519	GO_Cellular_Component_2023__Potassium Channel Complex (GO:0034705)	-0.370912	-2.60511	0	0.000257811	0.014	33/65	19.09%	KCNS2;KCNA4;KCNAB1;KCNIP3;KCNG1;KCNJ4;HCN2;KCNV1;KCNJ6;KCNS3;KCNB1;KCNA3;KCNA7;KCNK1;ABCC9;KCNF1;KCNA2;KCNQ2;KCNH1;KCNJ3;GRIK4;DPP6;KCNMB2;ABCC8;KCNJ16;KCNG3;KCNB2;KCNN1;GRIK5;CCDC51;KCNA1;KCNC2;KCND2	Micro
520	GO_Biological_Process_2023__Regulation Of Calcium Ion-Dependent Exocytosis (GO:0017158)	-0.5143	-2.60431	0	0.000253288	0.014	19/25	31.38%	CBARP;SYT10;SYT5;BAIAP3;DOC2B;KCNB1;STX1A;SYT7;SYT13;RPH3A;SYT3;SCAMP5;SYT4;SYT1;STXBP1;SYT9;RPH3AL;DOC2A;SYT11	Micro
521	MSigDB_Hallmark_2020__Oxidative Phosphorylation	-0.27329	-2.60258	0	0.000248921	0.014	129/197	43.78%	NDUFA7;MAOB;HSD17B10;NDUFA4;ATP6V1F;NDUFC2;SLC25A4;COX8A;TOMM22;MRPL34;NDUFV2;COX5B;TIMM50;TIMM10;ECH1;SLC25A11;IDH3G;BDH2;MRPS15;UQCR11;COX6A1;ATP5MF;NDUFB3;PHYH;CYCS;ATP5MC3;SURF1;MRPL11;NDUFAB1;GPX4;ATP5MC1;COX5A;ATP5PF;LDHB;MDH2;UQCRB;COX6B1;ATP5PO;MRPS12;NDUFS8;CYC1;ETFB;UQCRFS1;COX7A2;NDUFA6;TIMM8B;UQCRC1;ATP5F1D;IDH3B;COX4I1;ATP5ME;SLC25A5;NDUFB7;MDH1;OAT;UQCR10;NDUFB5;UQCRQ;NDUFB8;TIMM13;…	Micro
522	GO_Cellular_Component_2023__Small Ribosomal Subunit (GO:0015935)	-0.440113	-2.59542	0	0.00027046	0.016	30/38	37.56%	UBA52;RPS15;RPS5;RPS27A;RPS4Y1;MRPS12;FAU;MRPS6;RPS4X;RPS26;RPS10;RPS23;RPS11;RPS20;RPS3A;RPS18;RPS27;RPS21;RPS16;RPS14;RPS6;RPS25;RPS7;RPS15A;RPS8;RPS13;RPS2;RPS24;RPS3;RPS28	Micro
523	WikiPathway_2023_Human__Monoamine GPCRs WP58	-0.55298	-2.58736	0	0.000291281	0.018	16/22	19.75%	HTR1A;CHRM2;ADRA1B;HTR5A;HTR2C;ADRA2A;ADRA1A;DRD1;CHRM1;HTR2B;HTR1F;HTR2A;HRH1;CHRM3;HTR4;ADRB1	Micro
524	GO_Cellular_Component_2023__Mitochondrial Inner Membrane (GO:0005743)	-0.239618	-2.58257	0	0.000286506	0.018	209/335	43.84%	NDUFA7;SHMT2;COX16;GCAT;ACAD11;SLC25A22;BOK;MRPL54;CKMT1A;MRPL9;SLC25A1;PDE2A;SLC25A18;TMEM160;MRPL12;SLC9B2;MRPL40;MRPL28;STOML2;NDUFA4;MRPL55;CYP2E1;AURKAIP1;NDUFC2;SLC25A4;GADD45GIP1;NDUFB11;NDUFB10;MRPL23;COX8A;COA3;MICOS13;MRPL34;NDUFV2;MRPS33;COX5B;MRPL17;TIMM50;NDUFA13;TIMM10;CCDC51;SMDT1;HIGD1A;MRPL27;SLC25A11;ENDOG;MRPL43;MRPS15;UQCR11;COX6A1;MRPL10;CKMT2;ATP5MF;CHCHD1;NDUFB3;SLC25A32;MR…	Micro
525	WikiPathway_2023_Human__NO cGMP PKG Mediated Neuroprotection WP4008	-0.44235	-2.58045	0	0.000294141	0.019	20/37	18.84%	GRIN2C;TNF;IL1B;ACTN2;PRKG2;GUCY1A1;NPPA;CNGA1;CAMK2A;PDE2A;GRIN2B;PDE3A;GRIN1;GUCY1A2;CAMK2B;GUCY1B1;GRIN2A;CALM1;NEFL;CYCS	Micro
526	GO_Molecular_Function_2023__Voltage-Gated Potassium Channel Activity (GO:0005249)	-0.371167	-2.57832	0	0.000301533	0.02	33/60	21.54%	KCNS2;KCNJ12;KCNA4;KCNK2;KCNG1;KCNJ4;HCN2;KCNV1;KCNT1;KCNJ6;KCNS3;KCNJ9;KCNB1;KCNA3;KCNA7;KCNH3;KCNK1;KCNF1;KCNA2;KCNQ2;KCNH1;KCNJ3;KCNJ16;KCNH5;KCNG3;KCNB2;KCNN1;KCNA1;KCNC2;KCNH7;KCND2;KCNT2;KCNH8	Micro
527	GO_Biological_Process_2023__Axon Guidance (GO:0007411)	-0.302736	-2.57551	0	0.000320567	0.022	71/129	31.02%	BDNF;RAC3;EFNB3;UNC5A;EFNA4;RNF165;BOC;SEMA3E;EFNA3;LGI1;NOTCH3;TNR;CDK5R1;DPYSL5;KIF5C;SLIT2;L1CAM;ROBO4;EPHA10;NFIB;EPHA4;SEMA5A;CHN1;SEMA3C;NELL1;KIAA1755;EPHA5;GAP43;KIF5A;ENAH;EFNB2;SMO;EPHB3;LRTM1;SEMA3B;NTN1;CNTN2;SEMA3D;CXCL12;EPHA3;ROBO2;CNTN6;FEZ1;CNTN4;GLI2;RELN;KALRN;CYFIP2;EFNA5;NCAM1;NIBAN2;EPHB6;SEMA4F;NRXN1;DAG1;CNTN1;DCC;ROBO3;EPHA7;FYN;NELL2;NRCAM;UNC5C;NFASC;CNTN5;NEXN;SEMA6C;S…	Micro
528	GO_Cellular_Component_2023__Synaptic Membrane (GO:0097060)	-0.487359	-2.56041	0	0.000350706	0.025	17/29	17.14%	RIMS4;SHISA7;TMEM240;PDE2A;GRIN2B;GRIN1;ITGA3;FLRT3;LRRTM1;SYDE2;SHISA6;ATP2B2;LRRTM2;GRIA1;GRIN2A;SLITRK3;SHISA9	Micro
529	KEGG_2021_Human__Huntington disease	-0.248854	-2.54341	0	0.000425984	0.031	169/262	45.35%	CREB3L1;BDNF;NDUFA7;NDUFA4L2;KIF5C;TUBA4A;DNAH5;GRIN2B;GRIN1;STX1A;ATG101;TUBB2A;TUBB4A;PSMA8;COX7A1;NDUFA4;KLC2;UQCRHL;NDUFC2;SLC25A4;PSMC3;NDUFB11;NDUFB10;KIF5A;COX8A;AP2S1;NDUFV2;GRIA1;COX5B;PLCB1;NDUFA13;DNAH12;DNAH6;POLR2L;UQCR11;COX6A1;POLR2D;PLCB4;POLR2I;NDUFB3;PSMD8;GPX1;DCTN3;CYCS;ATP5MC3;NDUFAB1;CLTB;ATP5MC1;GRIA2;COX5A;TUBB2B;PSMA2;ATP5PF;POLR2J;PSMB5;UQCRB;COX6B1;ATP5PO;TUBA1A;NDUFS8;…	Micro
530	GO_Cellular_Component_2023__Asymmetric Synapse (GO:0032279)	-0.291	-2.53368	0	0.000499015	0.038	70/127	32.84%	ADGRB1;CDK5;INSYN1;ADGRA1;SRCIN1;SHANK1;SHISA7;CACNG8;MAPK8IP2;CDK5R1;RNF112;SH2D5;SAMD14;CACNG5;SLC8A2;AKAP5;SLC8A3;GRIN2B;GRIN1;SHANK3;P2RY1;NETO1;PPP1R9A;SHANK2;LZTS3;RGS14;GAP43;ARHGAP44;ADD2;SHISA6;CDH2;SCRIB;GRIA1;SIGMAR1;GRIN2A;SHISA9;KCND2;DNAJC6;GRIA2;KALRN;NLGN3;NLGN4X;SPOCK1;LRRC7;GRM7;FABP5;CTNND2;HIP1R;HOMER3;FYN;TMEM108;RPL38;RPL8;ADGRL1;DLG5;MAGI2;RPS18;RPL7;NLGN4Y;RPS27;RPL14;RPS1…	Micro
531	GO_Cellular_Component_2023__Cytosolic Small Ribosomal Subunit (GO:0022627)	-0.434671	-2.53299	0	0.000491676	0.038	29/37	37.56%	UBA52;RPS15;RPS5;RPS27A;RPS4Y1;MRPS12;FAU;RPS4X;RPS26;RPS10;RPS23;RPS11;RPS20;RPS3A;RPS18;RPS27;RPS21;RPS16;RPS14;RPS6;RPS25;RPS7;RPS15A;RPS8;RPS13;RPS2;RPS24;RPS3;RPS28	Micro
532	GO_Biological_Process_2023__Signal Release From Synapse (GO:0099643)	-0.442386	-2.52604	0	0.000506576	0.04	23/36	24.29%	SLC32A1;CDK5;SYT10;CPLX1;UNC13A;HRH3;SNPH;STX1A;NRXN2;PDZD11;SYN2;SNAP25;SYN1;RAB3A;LIN7B;PPFIA3;SYT1;VAMP2;CPLX2;STXBP1;RIMS1;NRXN1;LIN7A	Micro
533	KEGG_2021_Human__Intestinal immune network for IgA production	0.442588	2.5218	0	0.00509069	0.076	21/29	28.48%	IL15;CXCR4;ITGA4;IL6;HLA-DQB1;CD80;IL10;TNFSF13B;HLA-DQA1;HLA-DOA;HLA-DRB5;CD40;HLA-DMA;ICOSLG;IL15RA;HLA-DPB1;HLA-DMB;HLA-DRB1;LTBR;HLA-DPA1;CD86	Micro
534	GO_Biological_Process_2023__Immune Response-Activating Cell Surface Receptor Signaling Pathway (GO:0002429)	0.547921	2.51235	0	0.00545253	0.084	14/17	30.75%	FPR3;FPR2;CR1;SH2B2;MICB;FPR1;GPLD1;C5AR1;FCER1G;C5AR2;SLA2;SPG21;CMKLR1;C3AR1	Micro
535	GO_Molecular_Function_2023__miRNA Binding (GO:0035198)	0.462458	2.50825	0	0.00539973	0.087	23/25	43.97%	MATR3;SOX2;DND1;ZC3H10;DDX21;PNPT1;RBM10;ZNF346;YBX1;HNRNPA1;AGO4;ZC3H7B;AGO2;ELAVL1;RBM4;TUT7;ZC3H7A;TUT4;AGO3;PUM1;PUM2;HNRNPA2B1;RC3H1	Micro
536	WikiPathway_2023_Human__Immune Response To Tuberculosis WP4197	0.503762	2.50536	0	0.00535099	0.09	13/20	24.69%	IFI35;IFIT3;MX1;TAP1;IFIT1;PSMB8;PTPN2;IFNAR2;IRF1;STAT1;TYK2;STAT2;IRF9	Micro
537	GO_Cellular_Component_2023__Postsynaptic Density Membrane (GO:0098839)	-0.449331	-2.49391	0	0.000727298	0.057	23/33	29.43%	GRIN2C;DLG3;CACNG8;CACNG2;CACNG7;CACNG5;GRIN2B;GRIN3A;CACNG3;NETO1;PLPPR4;GRIK4;GRIA1;GRIK5;GRIN2A;GRIA2;PTPRS;GRIA3;GRID1;GRM1;GRIA4;GRM5;GRID2	Micro
538	WikiPathway_2023_Human__GPCRs Class A Rhodopsin Like WP455	-0.318788	-2.4911	0	0.000738459	0.059	46/97	18.73%	NPFFR2;HTR1A;OPRD1;GPR12;GALR1;CHRM2;GPR52;CNR1;CCKBR;F2R;ADRA1B;GPR83;SSTR1;P2RY13;HRH3;NMBR;HTR5A;HTR2C;EDNRA;ADRA2A;ADRA1A;CX3CR1;CYSLTR1;ADORA1;P2RY1;MAS1;GPR27;CCR5;DRD1;GPR63;CHRM1;SSTR2;HTR2B;HTR1F;HTR2A;GPR22;CCRL2;HRH1;ACKR2;GPR75;CHRM3;GPR19;F2RL1;NPY1R;HTR4;FSHR	Micro
539	GO_Biological_Process_2023__Amino Acid Import Across Plasma Membrane (GO:0089718)	0.499601	2.48944	0	0.00561196	0.099	12/20	14.83%	SLC47A1;SLC38A5;SLC6A13;SLC22A4;SLC7A5;SLC7A2;SLC1A3;SLC1A1;SLC36A1;SLC7A1;SLC1A2;SLC1A5	Micro
540	KEGG_2021_Human__Graft-versus-host disease	0.45735	2.4892	0	0.00541154	0.099	19/24	29.14%	IL6;HLA-DQB1;CD80;KLRD1;HLA-DQA1;HLA-DOA;HLA-DRB5;HLA-F;HLA-B;HLA-C;HLA-DMA;FAS;HLA-A;HLA-DPB1;HLA-DMB;HLA-DRB1;HLA-DPA1;CD86;HLA-E	Micro
541	WikiPathway_2023_Human__Type II Interferon Signaling WP619	0.442467	2.48385	0.00246914	0.00560493	0.105	23/27	41.34%	SOCS3;GBP1;ISG15;TAP1;IFI6;PSMB9;IFIT2;HLA-B;ICAM1;IRF1;STAT1;EIF2AK2;CYBB;STAT2;IRF9;IRF8;CIITA;PRKCD;PTPN11;SPI1;IFNGR2;IRF2;JAK2	Micro
542	GO_Biological_Process_2023__Response To Molecule Of Bacterial Origin (GO:0002237)	0.344363	2.48162	0	0.00555584	0.108	27/51	27.10%	SLC11A1;S100A8;FCGR2B;S100A9;TRIM6;NOS1;FZD5;IL6;PTPN22;IL10;CPS1;CD24;TNFAIP3;NOCT;GCH1;IRAK1;HMGB2;SRR;CD14;LIAS;LGALS9;FOXP1;TRIB1;EHHADH;IRF5;TIRAP;MAPKAPK3	Micro
543	GO_Molecular_Function_2023__Potassium Channel Activity (GO:0005267)	-0.36403	-2.46839	0	0.00101315	0.081	30/56	22.86%	KCNS2;KCNA4;KCNK3;KCNK2;KCNG1;KCNK12;HCN2;KCNV1;KCNT1;KCNS3;KCNH3;KCNK1;ABCC9;TMEM38A;KCNF1;KCNA2;KCNQ2;GRIK4;KCNMB2;KCNH5;HCN1;KCNN1;GRIK5;CCDC51;KCNA1;KCNC2;KCND2;KCNT2;KCNH8;KCNN4	Micro
544	GO_Biological_Process_2023__Positive Regulation Of Innate Immune Response (GO:0045089)	0.383309	2.46791	0	0.00626532	0.122	26/37	36.07%	CD1D;TRIM6;NLRC5;PLSCR1;FADD;FPR2;IFI35;WNT5A;GBP5;TLR8;IKBKE;POLR3G;POLR3B;EHHADH;TRIM62;TIRAP;RPS19;TASL;HLA-E;TRIM56;RNF185;RBM47;MAVS;POLR3C;SPI1;SLC15A4	Micro
545	GO_Cellular_Component_2023__Excitatory Synapse (GO:0060076)	-0.517059	-2.46775	0	0.000999272	0.081	19/22	36.20%	ATP2B3;SHANK1;SHISA7;SLC17A6;AKAP5;GRIN1;ITGA3;NETO1;BSN;SHISA6;SLC17A7;GRIA2;NLGN3;NLGN4X;FGFR2;NLGN4Y;SYT11;DLG4;NLGN1	Micro
546	GO_Cellular_Component_2023__Voltage-Gated Potassium Channel Complex (GO:0008076)	-0.358235	-2.46673	0	0.000996037	0.082	29/58	19.09%	KCNS2;KCNA4;KCNAB1;KCNIP3;KCNG1;KCNJ4;HCN2;KCNV1;KCNJ6;KCNS3;KCNB1;KCNA3;KCNA7;KCNK1;KCNF1;KCNA2;KCNQ2;KCNH1;KCNJ3;DPP6;KCNMB2;KCNJ16;KCNG3;HCN1;KCNB2;KCNN1;KCNA1;KCNC2;KCND2	Micro
547	GO_Biological_Process_2023__Defense Response To Gram-positive Bacterium (GO:0050830)	0.397111	2.46611	0	0.00611258	0.123	20/34	22.81%	FGR;TLR2;RNASE2;GBP2;H2BC12;IL6;H2BC11;H2BC8;GBP4;LYG1;H2BC21;TNFRSF14;MYD88;MR1;GSDMD;HMGB2;RNASE1;CASP4;HLA-A;EHHADH	Micro
548	GO_Biological_Process_2023__Regulation Of T Cell Mediated Cytotoxicity (GO:0001914)	0.490328	2.45295	0	0.0066787	0.138	15/21	29.14%	CD1D;FADD;CEACAM1;KLRD1;MICB;RIPK3;HFE;MICA;HLA-F;HLA-B;HLA-C;LILRB1;HLA-A;HLA-DRB1;HLA-E	Micro
549	GO_Biological_Process_2023__Regulation Of Viral Genome Replication (GO:0045069)	0.330687	2.45081	0	0.0065633	0.14	35/54	36.91%	TRIM6;PLSCR1;OASL;ISG20;IFITM2;IFITM3;MX1;OAS3;ISG15;APOBEC3F;BST2;RSAD2;OAS2;APOBEC3C;TARBP2;IFIT1;PDE12;PPIE;APOBEC3G;IFIT5;RAD23A;ZC3HAV1;SHFL;EIF2AK2;TMEM39A;IFIH1;PROX1;ZNFX1;PPARA;MAVS;DDB1;ILF3;VAPB;SRPK1;LARP1	Micro
550	GO_Biological_Process_2023__Regulation Of B Cell Activation (GO:0050864)	0.503506	2.44424	0	0.00684805	0.149	10/19	13.05%	SLAMF8;NOD2;FCGR2B;IL6;TNFSF4;IL4I1;IL10;IKZF3;TNFAIP3;THEMIS2	Micro
551	GO_Biological_Process_2023__Synaptic Vesicle Exocytosis (GO:0016079)	-0.427403	-2.44169	0	0.00138802	0.114	22/38	21.80%	CDK5;SYT10;STX1B;RIMS4;SYT5;DOC2B;CPLX1;UNC13A;SNPH;PRRT2;STX1A;SYT7;RIMS3;SNAP25;UNC13C;RAB3A;SYT4;SYT1;VAMP2;CPLX2;RIMS2;RIMS1	Micro
552	GO_Biological_Process_2023__Cellular Response To Ketone (GO:1901655)	0.401867	2.4307	0	0.00746136	0.161	16/33	16.36%	TNFSF4;SCNN1D;AKR1C3;SPP1;ADCY3;ADCY8;PTGER4;TRERF1;ADCY2;ADCY6;ADCY5;SPHK2;CFTR;PCK2;ADAM15;MAP4K1	Micro
553	GO_Biological_Process_2023__Negative Regulation Of Viral Genome Replication (GO:0045071)	0.368363	2.42191	0.00246914	0.0081532	0.177	24/41	29.83%	TRIM6;PLSCR1;OASL;ISG20;IFITM2;IFITM3;MX1;OAS3;ISG15;APOBEC3F;BST2;RSAD2;OAS2;APOBEC3C;IFIT1;APOBEC3G;IFIT5;ZC3HAV1;SHFL;EIF2AK2;IFIH1;PROX1;ZNFX1;MORC2	Micro
554	GO_Cellular_Component_2023__Glutamatergic Synapse (GO:0098978)	-0.337376	-2.42071	0	0.00176968	0.146	48/73	40.08%	ATP2B3;ADGRA1;RAC3;NPTX2;SRCIN1;SPTB;SHISA7;LRRC4B;CACNG5;SLITRK1;IL1RAPL2;NPTXR;DLGAP3;BSN;SLITRK2;LRRTM3;ACTN1;NPTX1;SHISA6;SLITRK4;ATP2B2;LRFN5;HRAS;CADPS;SH3GL2;NOS1AP;SH3GL3;NLGN3;ADGRL3;NLGN4X;PIN1;DYNLL2;DLGAP1;NRG3;NELL2;NLGN4Y;ACTB;LRRC4;PTPRD;TANC1;RELA;NLGN1;STX4;IL1RAPL1;GRIPAP1;RHOA;SH3GL1;PCLO	Micro
555	MSigDB_Hallmark_2020__IL-6/JAK/STAT3 Signaling	0.307575	2.41986	0	0.00808364	0.18	32/64	24.69%	SOCS3;TLR2;MAP3K8;PIM1;IL1R1;IL18R1;ITGA4;IL6;CD44;IL4R;IL17RB;HMOX1;ITGB3;OSMR;IL10RB;BAK1;MYD88;PTPN2;ACVR1B;PTPN1;IRF1;CD14;EBI3;IL15RA;FAS;STAT1;CSF2RB;TNFRSF1B;TYK2;STAT2;IL17RA;IRF9	Micro
556	GO_Biological_Process_2023__Regulation Of Neurotransmitter Receptor Activity (GO:0099601)	-0.411316	-2.41333	0.00164474	0.00189472	0.158	20/39	17.14%	CRH;NPTX2;SHANK1;SHISA7;CACNG8;MAPK8IP2;CACNG2;BEGAIN;CACNG7;CACNG5;NPTXR;PRRT1;DLGAP3;CACNG3;NETO1;NPTX1;SHISA6;LYNX1;GSG1L;SHISA9	Micro
557	GO_Biological_Process_2023__Negative Regulation Of T Cell Activation (GO:0050868)	0.391739	2.40569	0	0.00890065	0.197	22/35	28.48%	FCGR2B;JAK3;SDC4;GPNMB;CEACAM1;VSIG4;CR1;IL4I1;PTPN22;CD80;IL10;TNFAIP8L2;LGALS3;CEBPB;DUSP3;SPN;LILRB1;PDCD1LG2;RIPOR2;HLA-DRB1;VSIR;CD86	Micro
558	KEGG_2021_Human__Leishmaniasis	0.305389	2.40526	0	0.00874701	0.199	35/67	27.51%	TLR2;MAPK11;FCGR3A;FCGR2A;ITGA4;CR1;HLA-DQB1;IL10;CR1L;TGFB2;FOS;FCGR1A;FCGR2C;MAPK13;PTGS2;TGFB3;HLA-DQA1;MYD88;HLA-DOA;NFKBIB;HLA-DRB5;PTPN6;IRAK1;HLA-DMA;NCF4;NFKBIA;STAT1;CYBB;HLA-DPB1;HLA-DMB;NCF2;HLA-DRB1;EEF1A1;HLA-DPA1;CYBA	Micro
559	KEGG_2021_Human__Morphine addiction	-0.318782	-2.39284	0	0.00229907	0.186	30/78	14.49%	SLC32A1;GABRA6;GNGT1;PDE8B;GABRD;GABRA4;GABRA5;KCNJ6;KCNJ9;GNG11;GNG3;GABBR1;PDE2A;PDE3A;GNG4;ADORA1;ADCY1;GNB5;DRD1;GABRG3;GABRG1;KCNJ3;PRKCG;GABRB1;GNAO1;GABRA1;GABBR2;PDE1C;GABRA3;GABRA2	Micro
560	GO_Biological_Process_2023__Positive Regulation Of T Cell Mediated Cytotoxicity (GO:0001916)	0.497547	2.3909	0	0.00960878	0.216	14/19	29.14%	CD1D;FADD;MICB;PVR;HFE;MR1;MICA;HLA-F;HLA-B;HLA-C;NECTIN2;HLA-A;HLA-DRB1;HLA-E	Micro
561	GO_Biological_Process_2023__Antigen Processing And Presentation Of Endogenous Peptide Antigen (GO:0002483)	0.549426	2.39045	0	0.00941279	0.217	12/15	29.14%	MICB;TAP1;HFE;MICA;HLA-F;HLA-B;TAP2;HLA-C;HLA-A;HLA-DRB1;ERAP2;HLA-E	Micro
562	GO_Biological_Process_2023__Positive Regulation Of Production Of Molecular Mediator Of Immune Response (GO:0002702)	0.419007	2.38989	0	0.00925796	0.219	19/28	30.54%	NOD2;TRIM6;IL6;TNFSF4;SLC7A5;PTPN22;IL10;WNT5A;TNFRSF14;SPHK2;SCIMP;LACC1;PHB2;XBP1;GPI;IRF5;CD86;HLA-E;EPHB2	Micro
563	WikiPathway_2023_Human__Allograft Rejection WP2328	0.32814	2.38771	0	0.00932931	0.226	34/54	29.14%	VEGFA;HLA-DQB1;CD80;IL10;GNLY;HLA-DQA1;ABCB1;HLA-DOA;HLA-DRB5;MICA;HLA-F;C1QA;CD40;HLA-B;CASP7;HLA-C;C1QB;C2;HLA-DMA;C5;CD55;VIM;FAS;C1QC;HLA-A;STAT1;CASP9;HLA-DPB1;LRRK2;HLA-DMB;HLA-DRB1;HLA-DPA1;CD86;HLA-E	Micro
564	WikiPathway_2023_Human__Measles Virus Infection WP4630	0.259045	2.38513	0	0.00924444	0.228	59/103	35.68%	TLR2;FCGR2B;JAK3;BBC3;FADD;IL6;HSPA1B;PIK3R2;HSPA6;FOS;PIK3R3;MX1;OAS3;IRF7;TRADD;CDK2;OAS2;TNFAIP3;NFKB2;BAK1;MYD88;NFKBIB;IKBKE;IRAK1;IKBKG;STAT5A;CCND3;MAPK10;CCND1;IFNAR2;RIGI;BAX;FAS;NFKBIA;STAT1;TYK2;EIF2AK2;IFIH1;STAT2;CASP9;IRF9;BCL2L1;RACK1;STAT3;TRAF3;CDKN1B;CHUK;CDK6;NFKB1;RCHY1;CASP8;EIF3H;EIF2AK3;ADAR;BCL2;MAVS;IFNAR1;STAT5B;MSN	Micro
565	WikiPathway_2023_Human__GPCRs Other WP117	-0.379049	-2.38115	0	0.00247196	0.2	27/47	21.02%	CHRM2;CNR1;CCKBR;F2R;GPR83;P2RY13;MCHR2;EDNRA;OR2M4;GPR61;CELSR1;CELSR3;CCR5;SSTR2;HTR1F;HTR2A;CELSR2;SMO;ADGRE3;RXFP1;ADGRF5;GPR176;CHRM3;FSHR;GPR162;ADGRL3;GRM8	Micro
566	GO_Cellular_Component_2023__Organelle Inner Membrane (GO:0019866)	-0.219006	-2.38069	0	0.00246006	0.2	214/356	43.84%	NDUFA7;SHMT2;COX16;GCAT;ACAD11;DPY19L2;SLC25A22;BOK;MRPL54;CKMT1A;MRPL9;SLC25A1;PDE2A;SLC25A18;TMEM160;MRPL12;SLC9B2;MRPL40;MRPL28;STOML2;TM7SF2;NDUFA4;MRPL55;CYP2E1;AURKAIP1;NDUFC2;SLC25A4;GADD45GIP1;NDUFB11;NDUFB10;MRPL23;COX8A;COA3;MICOS13;MRPL34;NDUFV2;MRPS33;COX5B;MRPL17;TIMM50;NDUFA13;TIMM10;CCDC51;SMDT1;HIGD1A;MRPL27;SLC25A11;ENDOG;MRPL43;MRPS15;UQCR11;COX6A1;MRPL10;CKMT2;ATP5MF;CHCHD1;NDU…	Micro
567	KEGG_2021_Human__Prion disease	-0.24051	-2.37981	0	0.00246721	0.203	121/230	35.76%	CREB3L1;GRIN2C;CAV1;TNF;IL1B;MAPK12;NDUFA7;NDUFA4L2;EGR1;KIF5C;CAV2;TUBA4A;GRIN2B;GRIN1;GRIN3A;IL1A;HSPA1A;TUBB2A;TUBB4A;PSMA8;COX7A1;HSPA1L;HSPA8;NDUFA4;KLC2;UQCRHL;NDUFC2;SLC25A4;PSMC3;NDUFB11;NDUFB10;KIF5A;COX8A;NDUFV2;COX5B;NDUFA13;GRIN2A;UQCR11;COX6A1;NDUFB3;PSMD8;HSPA2;CYCS;ATP5MC3;NDUFAB1;DDIT3;ATP5MC1;COX5A;NCF1;TUBB2B;PSMA2;ATP5PF;PSMB5;UQCRB;COX6B1;ATP5PO;CSNK2B;TUBA1A;NCAM1;NDUFS8;CYC1…	Micro
568	KEGG_2021_Human__Bile secretion	0.340113	2.37388	0	0.00997177	0.251	21/48	15.18%	SLC22A1;ADCY4;UGT2B17;SLC4A5;AQP9;ABCC3;ADCY3;ADCY8;SLC51A;ABCC2;AQP4;ATP1A2;ADCY2;KCNN2;ADCY6;SLC4A4;ABCB1;ATP1B2;ADCY5;SLC2A1;CFTR	Micro
569	GO_Biological_Process_2023__Cell-Cell Adhesion Via Plasma-Membrane Adhesion Molecules (GO:0098742)	-0.286915	-2.37168	0	0.00257612	0.213	69/122	32.45%	AMIGO2;CLDN1;PCDHB10;AMIGO1;CDH13;CRB2;PCDHB14;CLDN7;SCARF2;PCDHB9;CLDN16;MAG;LRRC4B;NTNG1;SDK2;SLITRK1;CDH7;CADM3;NECTIN1;PTK7;CD6;CLDN4;L1CAM;ROBO4;FLRT3;LRFN4;CDH22;FAT4;TRO;TENM3;SLITRK2;PCDHB4;CLDN11;CELSR2;CDH2;LRFN5;CDH4;TENM1;SLITRK3;MPZ;CNTN2;CLDN10;CDH9;ROBO2;CDH3;CDH11;CNTN6;CNTN4;PTPRS;CLDN20;ADGRL3;PCDHB5;PTPRF;CDH12;CDHR3;ROBO3;CLDN12;ADGRL1;CDH8;NEXN;CADM2;GRID2;CDH6;TENM2;CDH23;CD…	Micro
570	GO_Biological_Process_2023__Positive Regulation Of Cytokine-Mediated Signaling Pathway (GO:0001961)	0.37023	2.3678	0	0.0101113	0.256	27/37	36.35%	CXCR4;TRIM6;NLRC5;FADD;HSPA1B;HIF1A;PARP9;IRGM;WNT5A;TXK;PARP14;IKBKE;AGPAT2;CD300LF;CPNE1;CASP1;CASP4;GAS6;AXL;TRIM56;CD74;RNF185;RBM47;MAVS;RIPK1;PRKN;LAPTM5	Micro
571	GO_Biological_Process_2023__Regulation Of Wound Healing (GO:0061041)	-0.409704	-2.36388	0	0.00262748	0.217	19/36	19.57%	CLDN1;CAV1;F2R;VIL1;ANXA1;ADRA2A;FGF2;CLDN4;DUOX1;TNFRSF12A;DMTN;MMRN1;OCLN;CD109;PLAU;HRAS;MYLK;F2RL1;KANK1	Micro
572	WikiPathway_2023_Human__Mitochondrial Complex I Assembly Model OXPHOS System WP4324	-0.37623	-2.36349	0.00159744	0.0025962	0.217	36/50	41.01%	NDUFA7;NDUFC2;NDUFB11;NDUFB10;NDUFV2;NDUFA13;NDUFB3;NDUFAB1;NDUFAF3;DMAC1;NDUFA6;NDUFB7;NDUFB5;NDUFB8;DMAC2;NDUFAF4;NDUFB2;NDUFS3;NDUFA2;NDUFA8;NDUFAF1;NDUFA3;NDUFA12;NDUFB4;NDUFS5;NDUFS6;NDUFA1;NDUFS2;NDUFB1;NDUFC1;ECSIT;NDUFA5;NDUFB6;NDUFB9;TMEM70;NDUFV1	Micro
573	GO_Biological_Process_2023__Positive Regulation Of Immune Response (GO:0050778)	0.315805	2.36189	0	0.0104459	0.27	32/57	31.30%	IL15;NOD2;FCGR2B;CD1D;PLSCR1;FADD;FPR2;TNFSF4;IFI35;IL10;TGFB2;GBP5;RSAD2;PYCARD;TLR8;SPHK2;ZP3;POLR3G;LILRB1;POLR3B;XBP1;LGALS9;TIRAP;HLA-DMB;TASL;HLA-DRB1;GSDME;CD226;TRIM56;CD74;RNF185;ITGB2	Micro
574	WikiPathway_2023_Human__Type I Interferon Induction And Signaling During SARS CoV 2 Infection WP4868	0.415791	2.3586	0	0.0106825	0.28	22/28	39.55%	TLR2;TREML4;OAS3;IRF7;OAS2;MYD88;IKBKE;IFNAR2;RIGI;STAT1;TYK2;EIF2AK2;IFIH1;STAT2;IRF9;TLR3;TRAF3;MAVS;IFNAR1;IRAK4;TLR6;TBK1	Micro
575	KEGG_2021_Human__Retrograde endocannabinoid signaling	-0.279512	-2.35752	0	0.00269081	0.225	75/127	37.01%	SLC32A1;GABRA6;GNGT1;MAPK12;CNR1;NDUFA7;GABRD;NDUFA4L2;GABRA4;GABRA5;FAAH;KCNJ6;KCNJ9;SLC17A6;GNG11;GNG3;GNG4;ADCY1;GNB5;NDUFA4;GABRG3;GABRG1;KCNJ3;PRKCG;NDUFC2;GABRB1;NDUFB11;NDUFB10;GNAO1;GABRA1;GABRA3;MGLL;GABRA2;NDUFV2;GRIA1;PLCB1;NDUFA13;GABRG2;PLCB4;SLC17A7;NDUFB3;GABRB2;NDUFAB1;GRIA2;GABRB3;RIMS1;NDUFS8;GRIA3;NDUFA6;GRM1;GRIA4;NDUFA11;NDUFB7;PLCB3;NDUFB5;NDUFB8;GRM5;NDUFB2;NDUFS3;NDUFA2;ND…	Micro
576	WikiPathway_2023_Human__Oligodendrocyte Specification And Differentiation Leading To Myelin Components For CNS WP4304	-0.507479	-2.35603	0.00180505	0.00272137	0.228	15/21	25.27%	TNF;IL1B;MAG;SOX8;ASCL1;OLIG2;FGF2;IGF1;OLIG1;SOX10;GLI2;PLP1;MOG;CNP;SOX6	Micro
577	KEGG_2021_Human__Ovarian steroidogenesis	0.407661	2.35176	0	0.0111852	0.294	14/30	13.69%	ADCY4;BMP6;CYP19A1;AKR1C3;CYP1B1;ACOT2;CYP2J2;ADCY3;PTGS2;ADCY8;ADCY2;ADCY6;ADCY5;INSR	Micro
578	KEGG_2021_Human__Cardiac muscle contraction	-0.347727	-2.35137	0	0.0027687	0.233	40/61	34.76%	CACNA2D2;CACNG8;TRDN;CACNG2;CACNG7;CACNG5;SLC8A2;ATP1A3;SLC8A3;CACNG3;COX7A1;UQCRHL;COX8A;COX5B;UQCR11;COX6A1;COX5A;UQCRB;COX6B1;CACNB2;CYC1;CACNA2D3;UQCRFS1;COX7A2;TPM2;UQCRC1;RYR2;CACNA2D1;COX4I1;ATP2A3;UQCR10;UQCRQ;CACNB1;COX7C;UQCRH;CACNB4;COX6C;ATP1B1;TPM1;COX7B	Micro
579	GO_Biological_Process_2023__Potassium Ion Transport (GO:0006813)	-0.297202	-2.34746	0	0.00286676	0.243	40/91	19.54%	KCNS2;KCNJ12;KCNA4;KCNAB1;KCNK3;KCNK2;KCNG1;KCNK12;KCNJ4;HCN2;KCNV1;KCNJ6;KCNS3;KCNB1;KCNA3;KCNA7;KCNH3;KCNK1;ABCC9;KCNF1;KCNA2;KCNQ2;KCNH1;KCNJ3;KCNMB2;ABCC8;KCNJ16;KCNH5;KCNG3;HCN1;KCNB2;KCNN1;CCDC51;SLC24A2;KCNA1;SLC17A7;KCNC2;KCNH7;KCND2;SLC9A5	Micro
580	GO_Biological_Process_2023__Synapse Assembly (GO:0007416)	-0.348695	-2.34706	0	0.00285162	0.244	36/58	32.45%	BDNF;CDK5;PCDHB10;LGI2;CBLN4;PCDHB14;PCDHB9;SDK2;SLITRK1;NRXN2;SHANK3;FLRT3;SPOCK2;SHANK2;DRD1;DNER;PCDHB4;GABRA1;CDH2;GABRA2;GABRG2;GABRB2;GPM6A;NLGN3;ADGRL3;NLGN4X;PCDHB5;GABRB3;FZD1;NRXN1;NRCAM;GRID2;NLGN4Y;DSCAM;LRRC4;PTPRD	Micro
581	GO_Biological_Process_2023__Energy Derivation By Oxidation Of Organic Compounds (GO:0015980)	-0.410457	-2.34445	0	0.00290437	0.251	27/37	37.21%	MRAP2;NR4A3;PID1;NDUFA4;COX8A;ADGRF5;COX5B;UQCR11;COX6A1;CYCS;COX5A;UQCRB;COX6B1;CYC1;COX7A2;UQCRC1;COX4I1;UQCR10;UQCRQ;CHCHD5;COX7C;MT3;UQCRH;COX6C;COX7B;MTLN;SDHAF4	Micro
582	GO_Molecular_Function_2023__Transmitter-Gated Monoatomic Ion Channel Activity Involved In Regulation Of Postsynaptic Membrane Potential (GO:1904315)	-0.485154	-2.34409	0	0.00288915	0.252	17/22	30.08%	GRIN2C;CHRNB2;CHRNA4;GRIN2B;GRIN3A;GRIK4;GABRA2;GRIA1;GRIK5;GRIN2A;GRIA2;GRIA3;GRID1;GRIA4;CHRNA7;GRID2;CHRNE	Micro
583	GO_Biological_Process_2023__Cell Junction Assembly (GO:0034329)	-0.317235	-2.32822	0	0.00332853	0.287	37/76	24.80%	BDNF;CDK5;PCDHB10;CDH13;PCDHB14;PCDHB9;PKP2;ARVCF;SDK2;SLITRK1;CDH7;GJC1;NRXN2;SHANK3;FLRT3;SPOCK2;SHANK2;DRD1;CDH22;DNER;PCDHB4;TRPV4;CDH2;CDH4;CDH9;CDH3;CDH11;GPM6A;NLGN3;ADGRL3;PCDHB5;CDH12;PARD6B;NRXN1;CTNND2;CDHR3;FN1	Micro
584	GO_Biological_Process_2023__Extracellular Matrix Organization (GO:0030198)	0.25197	2.32482	0	0.0136128	0.356	44/108	18.45%	TGFBI;ADAMTS15;SH3PXD2B;ADAM8;COL4A2;SMOC2;COL28A1;COL4A1;COL23A1;ADAMTS12;ADAMTS9;COL10A1;HPSE2;GREM1;TGFB2;CYP1B1;COL27A1;HMCN1;THSD4;ADAMTS19;ADAMTS14;SLC39A8;MANSC4;NID1;DDR2;ADAMTS2;WASHC1;LAMC1;COLQ;FURIN;COLGALT2;EXOC8;LOXL2;ADAMTS16;MMP14;ADAMTS17;TGFBR1;ADAMTSL4;SERPINF2;PLOD3;ADAM15;COL18A1;ST7;COLGALT1	Micro
585	GO_Cellular_Component_2023__Ionotropic Glutamate Receptor Complex (GO:0008328)	-0.430445	-2.32477	0	0.00338262	0.291	22/32	29.43%	GRIN2C;SHISA7;CACNG8;CACNG7;CACNG5;GRIN2B;GRIN1;GRIN3A;VWC2L;CACNG3;GRIK4;VWC2;SHISA6;GRIA1;GRIK5;GRIN2A;SHISA9;GRIA2;GRIA3;GRIA4;OLFM2;GRID2	Micro
586	GO_Biological_Process_2023__Positive Regulation Of Defense Response (GO:0031349)	0.270463	2.32474	0	0.013351	0.356	39/92	21.67%	IL15;TLR2;S100A8;S100A9;OSM;CD1D;AIM2;ADAM8;PLSCR1;FADD;SERPINE1;PLA2G7;FPR2;TNFSF4;EMILIN2;IFI35;IRGM;WNT5A;GBP5;MAPK13;PTGER4;TRADD;PYCARD;TLR8;AGT;RNF31;GPRC5B;ZP3;GSDMD;ETS1;NLRC4;NFKBIZ;GPSM3;POLR3G;SETD4;POLR3B;CASP1;CASP4;NFKBIA	Micro
587	GO_Biological_Process_2023__Vascular Transport (GO:0010232)	0.296254	2.32296	0	0.013177	0.357	26/67	14.83%	SLC22A1;SLC2A3;KCNJ8;SLC38A5;ABCC3;SLC6A13;SLC7A5;SLC7A2;SLC1A3;SLC24A3;SLC1A1;TFRC;ABCC2;SLC7A1;SLCO3A1;ATP1A2;SLC5A6;SLC4A4;ABCB1;ATP1B2;SLC1A2;SLC13A3;INSR;SLC2A1;MFSD2A;SLC1A5	Micro
588	GO_Molecular_Function_2023__Serotonin Receptor Activity (GO:0099589)	-0.557837	-2.31799	0	0.00347597	0.298	12/16	24.11%	HTR1A;HTR3B;CHRM2;HRH3;HTR5A;HTR2C;HTR2B;HTR1F;HTR2A;CHRM3;HTR4;HTR1E	Micro
589	GO_Biological_Process_2023__Regulation Of Inflammatory Response (GO:0050727)	0.221928	2.31468	0	0.0139789	0.379	65/166	22.84%	IL15;TLR2;NOD2;S100A8;S100A9;OSM;BST1;GPER1;IL1R1;AIM2;BCL6;SERPINE1;SHPK;IL6;PLA2G7;FPR2;TNFSF4;IFI35;ADAMTS12;USP18;IL10;TNFAIP8L2;KLF4;METRNL;DAGLA;IRGM;WNT5A;GBA1;MAPK13;SLC39A8;PTGS2;NLRC3;NLRP4;NLRP2;PTGER4;TRADD;TNFAIP3;PYCARD;CARD16;AGT;SPATA2;PPARG;MYD88;PTPN2;GPRC5B;SBNO2;ZP3;GSDMD;LACC1;GHRL;MVK;ETS1;NLRC4;NFKBIZ;GPSM3;MFHAS1;PPARD;PSMA6;SETD4;CASP1;CASP4;NFKBIA;FOXP1;IL10RA;TNFRSF1B	Micro
590	GO_Biological_Process_2023__Positive Regulation Of Excitatory Postsynaptic Potential (GO:2000463)	-0.495577	-2.31066	0	0.00366334	0.316	15/21	26.93%	GRIN2C;STX1B;SHANK1;GRIN2B;GRIN1;SHANK3;NETO1;CUX2;GRIN2A;RELN;NLGN3;RIMS2;RIMS1;NRXN1;PRKCZ	Micro
591	GO_Biological_Process_2023__Neuropeptide Signaling Pathway (GO:0007218)	-0.448533	-2.30865	0	0.00372808	0.324	14/28	11.86%	PNOC;NXPH2;NMU;OPRD1;GALR1;GPR83;NPY;SSTR1;NPPA;MCHR2;CYSLTR1;GLRA2;SSTR2;GLRB	Micro
592	KEGG_2021_Human__GABAergic synapse	-0.310088	-2.30839	0	0.00368965	0.324	31/75	17.93%	SLC32A1;GABRA6;GNGT1;GABRD;GAD2;SLC6A11;GABRA4;GABRA5;GLS2;KCNJ6;GNG11;GNG3;GABBR1;GNG4;ADCY1;SLC38A1;SLC12A5;GNB5;GABRG3;GAD1;GABRG1;PRKCG;GABRB1;GNAO1;GABRA1;GABBR2;GABRA3;GABRA2;GABARAP;GABRG2;GABRB2	Micro
593	GO_Biological_Process_2023__Regulation Of Neuron Projection Development (GO:0010975)	-0.255027	-2.30581	0	0.00375279	0.33	65/157	24.67%	BDNF;CDK5;KNDC1;NOVA2;STX1B;SRCIN1;FKBP4;MAG;TNR;CDK5R1;BRSK2;NTNG1;RTN4R;PTK7;MDK;DPYSL3;CAMK2B;RTN4RL2;SHANK3;PAK3;PLPPR5;EPHA4;CAMK1;RIT2;ZNF365;CHN1;STMN2;CX3CL1;DBN1;LZTS3;TENM3;CRMP1;NDRG4;KIF1A;ARHGAP44;BRSK1;TRPV4;EFNB2;CDH2;TBR1;MARK1;FUT9;EPHB3;GPC2;PLK5;NCS1;EPHA3;GSK3A;KANK1;RELN;PTPRS;SEZ6;CIB1;NTNG2;SPOCK1;FZD1;LRRC7;FES;ITM2C;CFL1;CSMD3;PPFIA2;MUSK;NTRK3;SERPINI1	Micro
594	GO_Biological_Process_2023__Regulation Of AMPA Receptor Activity (GO:2000311)	-0.466094	-2.30382	0.0017452	0.00377629	0.336	15/24	20.71%	SHANK1;SHISA7;CACNG8;MAPK8IP2;CACNG2;CACNG7;CACNG5;SHANK3;PRRT1;CACNG3;SHISA6;GSG1L;SHISA9;RELN;NLGN3	Micro
595	GO_Biological_Process_2023__Negative Regulation Of Lymphocyte Activation (GO:0051250)	0.498374	2.30343	0	0.0152024	0.414	9/17	13.60%	FCGR2B;JAK3;GPNMB;IL4I1;PTPN22;TNFAIP8L2;LGALS3;TNFAIP3;MICA	Micro
596	GO_Biological_Process_2023__Memory (GO:0007613)	-0.349424	-2.29061	0	0.00409566	0.368	21/50	16.41%	BDNF;CALB1;CHRNB2;LRRC66;SHANK1;SHISA7;PLK2;SLC8A2;SLC8A3;CAMK4;LDLR;SHANK3;NETO1;CAMK2N1;MAPT;RGS14;CUX2;RASGRF1;SCN2A;PLCB1;MAP1A	Micro
597	KEGG_2021_Human__Measles	0.247443	2.28971	0	0.0167266	0.45	59/106	35.68%	TLR2;FCGR2B;JAK3;BBC3;FADD;IL6;HSPA1B;PIK3R2;HSPA6;MX2;FOS;PIK3R3;MX1;OAS3;IRF7;TRADD;CDK2;OAS2;TNFAIP3;BAK1;MYD88;NFKBIB;IKBKE;IRAK1;IKBKG;STAT5A;CCND3;MAPK10;CCND1;IFNAR2;BAX;AKT1;FAS;NFKBIA;STAT1;TYK2;EIF2AK2;IFIH1;STAT2;CASP9;IRF9;BCL2L1;RACK1;STAT3;TRAF3;CDKN1B;CHUK;CDK6;NFKB1;RCHY1;CASP8;EIF3H;EIF2AK3;ADAR;BCL2;MAVS;IFNAR1;STAT5B;MSN	Micro
598	GO_Cellular_Component_2023__Axonal Growth Cone (GO:0044295)	-0.555751	-2.2895	0	0.00410025	0.372	11/15	26.26%	FKBP4;KIF5C;RTN4R;L1CAM;FLRT3;OLFM1;GPM6A;COBL;DCC;HSP90AB1;HSP90AA1	Micro
599	WikiPathway_2023_Human__T Cell Receptor Signaling Pathway WP69	0.286085	2.28931	0.00266667	0.0164573	0.451	55/65	52.52%	MAP3K8;PSTPIP1;VAV3;PIK3R2;FOS;CD247;IKBKG;MAP4K1;LCP2;PRKCQ;AKT1;SHC1;NFKBIA;WAS;REL;CRKL;PTK2B;DBNL;NFATC1;CHUK;RIPK2;PDPK1;NFKB1;PRKCD;NFATC2;PTPN11;CDC42;GRB2;CARD11;MAPK14;ITPR1;FYB1;NCK1;MAP2K1;PIK3R1;SOS1;RAF1;MAPK1;CBL;ATF2;GAB2;MAP3K7;CREB1;IKBKB;PAK1;MAPK8;CD4;MAPK9;VAV1;MALT1;CRK;MAP3K14;TRAF6;CBLB;SH2B3	Micro
600	GO_Biological_Process_2023__Regulation Of Catecholamine Secretion (GO:0050433)	-0.4834	-2.28317	0.00340136	0.00432079	0.389	15/23	25.07%	CHRNB2;CHRNA4;SYT10;SYT5;HRH3;KCNB1;STX1A;SYT7;KCNA2;SYT13;SYT3;SYT4;SYT1;FGF20;SYT9	Micro
601	GO_Biological_Process_2023__Transport Across Blood-Brain Barrier (GO:0150104)	0.289571	2.27948	0.00271739	0.0177648	0.479	26/68	14.83%	SLC22A1;SLC2A3;KCNJ8;SLC38A5;ABCC3;SLC6A13;SLC7A5;SLC7A2;SLC1A3;SLC24A3;SLC1A1;TFRC;ABCC2;SLC7A1;SLCO3A1;ATP1A2;SLC5A6;SLC4A4;ABCB1;ATP1B2;SLC1A2;SLC13A3;INSR;SLC2A1;MFSD2A;SLC1A5	Micro
602	KEGG_2021_Human__Human T-cell leukemia virus 1 infection	0.209053	2.27442	0	0.0181874	0.492	85/185	31.49%	IL15;ADCY4;BUB1B;JAK3;IL1R1;CCNA1;MYC;IL6;E2F1;PIK3R2;HLA-DQB1;CDKN1A;TGFB2;FOS;PIK3R3;ADCY3;FOSL1;ANAPC2;ADCY8;NRP1;ZFP36;CDK2;CRTC3;TGFB3;CHEK1;ADCY2;ADCY6;CDKN2B;NFKB2;HLA-DQA1;CREB5;HLA-DOA;ADCY5;HLA-DRB5;HLA-F;SLC2A1;TGFBR1;IKBKG;STAT5A;TSPO;CCND3;CD40;HLA-B;ADCY9;MAPK10;RELB;ITGAL;CCND1;ETS1;HLA-C;ICAM1;ETS2;HLA-DMA;CRTC2;BAX;IL15RA;AKT1;HLA-A;NFKBIA;B2M;ATF6B;CDKN2A;ATF4;HLA-DPB1;BCL2L1;CD…	Micro
603	MSigDB_Hallmark_2020__Hypoxia	0.216997	2.27294	0	0.0180221	0.494	57/167	18.28%	TGFBI;ANXA2;PPP1R3C;PIM1;PLAC8;CXCR4;ANGPTL4;TGM2;SDC2;P4HA2;FOSL2;SULT2B1;DDIT4;SLC2A3;SDC4;GPC4;SERPINE1;IL6;VEGFA;ISG20;TES;HMOX1;CDKN1A;LDHC;PPARGC1A;EFNA1;NDST2;GPC3;FOS;ATF3;SAP30;NDRG1;NFIL3;ZFP36;MT2A;DUSP1;TNFAIP3;TGFB3;BHLHE40;PLAUR;F3;ANKZF1;MAFF;PLIN2;NOCT;SLC2A1;PFKP;VLDLR;PGM1;SLC2A5;MT1E;CASP6;GYS1;JMJD6;LDHA;ETS1;NDST1	Micro
604	GO_Biological_Process_2023__Calcium-Ion Regulated Exocytosis (GO:0017156)	-0.483249	-2.27234	0.00166667	0.0047141	0.421	15/22	25.07%	SYT10;RIMS4;SYT5;DOC2B;SYT7;SYT13;RIMS3;RAB3A;SYT3;SYT4;SYT1;VAMP2;RIMS2;RIMS1;SYT9	Micro
605	GO_Biological_Process_2023__Positive Regulation Of Synaptic Transmission, Glutamatergic (GO:0051968)	-0.498501	-2.27087	0	0.00474915	0.428	14/20	23.35%	GRIN2C;CCL2;CACNG8;CACNG7;CACNG5;GRIN2B;GRIN1;SHANK3;CACNG3;DRD1;GRIN2A;RELN;NLGN3;NRXN1	Micro
606	GO_Biological_Process_2023__Cell Morphogenesis Involved In Neuron Differentiation (GO:0048667)	-0.326067	-2.27043	0	0.00471115	0.429	38/70	29.95%	ADGRB1;CDK5;NEFH;MAPK8IP2;CCK;BRSK2;NTNG1;SLITRK1;PAK3;TRIM46;CDHR1;PLPPR4;SLITRK2;RAB3A;LLGL1;BRSK1;CELSR2;SSNA1;SLITRK4;ANK3;SLITRK3;MAP1A;DCDC2;MAP1B;CNTN4;NTNG2;PARD6B;MAP2;MAP6;S100A6;APLP1;SLITRK5;DCC;NRCAM;FGFR2;ATL1;APBB1;S100B	Micro
607	GO_Molecular_Function_2023__Ligand-Gated Monoatomic Ion Channel Activity (GO:0015276)	-0.550847	-2.26805	0	0.00474556	0.433	12/15	24.81%	CHRNB2;CHRNA4;GABRA5;GRIN2B;GRIN1;GRIK4;GABRB1;GABRA2;GRIA1;GRIK5;GRIA3;GRIA4	Micro
608	GO_Biological_Process_2023__Regulation Of Defense Response (GO:0031347)	0.277201	2.26675	0	0.0185396	0.507	30/72	23.37%	FGR;NOD2;FCGR2B;BST1;IL1R1;BCL6;SHPK;TNFSF4;ADAMTS12;USP18;PTPN22;WNT5A;DHX58;PTGS2;NLRP4;NLRP2;CARD16;SPATA2;MYD88;SBNO2;LACC1;LRP8;IRF1;PSMA6;HERC5;CASP1;CASP4;FOXP1;TREM2;APOE	Micro
609	GO_Cellular_Component_2023__GABA-ergic Synapse (GO:0098982)	-0.523492	-2.2647	0	0.00484324	0.442	12/18	21.00%	ATP2B3;CBLN4;SLITRK1;LRRTM1;BSN;SLITRK2;ATP2B2;LRRTM2;LRFN5;SLITRK3;NLGN3;NLGN4X	Micro
610	MSigDB_Hallmark_2020__Epithelial Mesenchymal Transition	0.218561	2.2575	0	0.019618	0.534	54/154	15.87%	IL15;TGFBI;TNFRSF11B;GADD45B;TGM2;COL4A2;SDC4;SERPINE1;COL4A1;ABI3BP;GEM;IL6;CD44;NNMT;VEGFA;THBS1;ITGA2;TGFBR3;MYL9;TIMP1;TIMP3;SPP1;TAGLN;CRLF1;GREM1;FSTL1;LAMA2;ITGB3;WNT5A;PVR;PDGFRB;FLNA;LAMA3;TNFAIP3;GJA1;FZD8;LAMC1;SLC6A8;PLAUR;FERMT2;EMP3;VCAN;SNTB1;ID2;LOXL2;ITGAV;CADM1;GPX7;CALD1;MMP14;EFEMP2;FBN1;PLOD3;PLOD1	Micro
611	GO_Biological_Process_2023__Regulation Of Innate Immune Response (GO:0045088)	0.276625	2.25501	0	0.0195034	0.536	47/70	42.18%	FGR;FCGR2B;CD1D;ADAM8;PLSCR1;FADD;FPR2;IFI35;PTPN22;ZDHHC18;TRIM21;PARP9;GBP5;DHX58;NLRC3;TNFAIP3;TLR8;LYAR;PTPN6;PTPN1;LRP8;IRF1;POLR3G;MUL1;POLR3B;AKT1;TREM2;TIRAP;TASL;HLA-E;CEP63;TRIM56;RNF185;CASP8;IRAK3;TRAFD1;PTPN11;POLR3C;SLC15A4;PCBP2;XIAP;SAMHD1;ATG5;APPL1;IFI16;PRKDC;BIRC2	Micro
612	KEGG_2021_Human__Pathways of neurodegeneration	-0.202233	-2.25473	0	0.00530497	0.477	231/399	44.47%	GRIN2C;BDNF;CDK5;AXIN2;TNF;IL1B;MAPK12;NEFH;WNT10B;NDUFA7;NDUFA4L2;CDK5R1;KIF5C;TUBA4A;DNAH5;MAP2K6;RAB39B;CAMK2A;NEFM;GRIN2B;GRIN1;STX1A;TRPC3;SNCAIP;IL1A;CAMK2B;ATG101;TUBB2A;WNT5B;TUBB4A;PSMA8;COX7A1;HSD17B10;FRAT1;NDUFA4;KLC2;CSF1;CHRM1;MAPT;UQCRHL;PRKCG;SPTBN2;NDUFC2;DKK2;UBB;SLC25A4;PSMC3;APC2;NDUFB11;NDUFB10;KIF5A;COX8A;UCHL1;CALM3;NDUFV2;GRIA1;FZD4;COX5B;PLCB1;NDUFA13;CHRM3;DNAH12;SIGMAR1…	Micro
613	GO_Biological_Process_2023__Visual Perception (GO:0007601)	0.310962	2.25437	0	0.0192202	0.537	26/53	23.32%	EFEMP1;RGS16;CNGB1;CACNA1F;E2F1;ADGRV1;EYA4;ROM1;POU6F2;CABP4;PRPH2;RDH10;CACNA2D4;KIFC3;EYS;IMPG2;COL18A1;UNC119;GUCA1B;BEST1;EML2;CRYGS;MYO7A;OPA3;SLC24A1;CEP250	Micro
614	WikiPathway_2023_Human__Extrafollicular And Follicular B Cell Activation By SARS CoV 2 WP5218	0.323458	2.25278	0	0.0191364	0.543	22/45	22.10%	PTCRA;CD1D;CXCR4;BCL6;IL6;PAX5;CR1;CD80;IL10;TNFSF13B;ISG15;SELL;MFGE8;IFIT2;CD82;STAT5A;CD40;IFNAR2;ETS1;ICOSLG;EBI3;XBP1	Micro
615	GO_Biological_Process_2023__Regulation Of Epithelial Cell Proliferation (GO:0050678)	0.297338	2.24995	0	0.0191387	0.551	25/63	15.48%	NOD2;BMP6;NUPR1;MYC;VEGFA;RUNX3;PRKD1;TGFBR3;SGPP2;FGF10;ZNF304;TGFB2;SOX2;NLRC3;HYAL1;SOX9;ZFP36;FUT1;AQP11;DAB2IP;LAMC1;CDKN2B;C5AR1;DUSP10;ANGPT1	Micro
616	GO_Molecular_Function_2023__Receptor Ligand Activity (GO:0048018)	-0.264487	-2.24945	0	0.00549332	0.494	52/127	19.63%	DPP4;CRH;SST;BDNF;PTHLH;CCL3;TAFA4;VGF;FGF17;IL17D;FGF5;FGF9;TNF;IL1B;CSPG5;WNT10B;CCL4;SEMA3E;INHBA;IFNE;CXCL13;CCK;NPPA;FGF2;IGF1;GNRH1;MDK;KITLG;VIP;IL1A;HSPA1A;WNT5B;GREM2;SEMA5A;TAFA5;SEMA3C;BMP8A;CX3CL1;CSF1;CHGB;MEN1;EGF;SEMA3B;SEMA3D;FGF7;FGF1;NBL1;JAG2;JAG1;TAFA1;CLEC11A;NRG4	Micro
617	GO_Biological_Process_2023__Neuron Differentiation (GO:0030182)	-0.274867	-2.24923	0	0.00545029	0.495	47/109	23.12%	CTF1;CDK5;EPOP;NOVA2;WNT10B;MET;EMX1;INHBA;EMX2;CDK5R1;BRSK2;ALK;ASCL1;SNPH;RNF112;NEUROD1;PBX4;MYT1L;WNT5B;POU3F2;TENM3;EPHA5;PAX6;BHLHE22;PBX1;BRSK1;RORB;SRF;ERBB2;ATP2B2;NGRN;FUT9;FZD4;TENM1;ATP8A2;LHX4;GLI2;SOX4;BRINP3;NLGN4X;SPOCK1;FZD3;FZD2;PIN1;FZD1;USH2A;ITM2C	Micro
618	GO_Molecular_Function_2023__Channel Activity (GO:0015267)	0.397163	2.2466	0.00246914	0.0194081	0.562	19/29	28.70%	BCL2A1;CHRNB1;SLC14A1;AQP9;RHCE;PDPN;RHD;AQP11;AQP4;GSDMD;TMEM266;SLC12A4;MCUB;MCL1;BAX;TRPV2;SLC12A7;GSDME;MPV17	Micro
619	GO_Biological_Process_2023__Positive Regulation Of Cytokine Production Involved In Immune Response (GO:0002720)	0.419942	2.24624	0	0.0191227	0.562	16/25	29.14%	NOD2;TRIM6;FZD5;TNFSF4;SLC7A5;WNT5A;TNFRSF14;HLA-F;SPHK2;SCIMP;LACC1;CD55;HLA-A;IRF5;CD226;HLA-E	Micro
620	GO_Biological_Process_2023__Negative Regulation Of Lipid Storage (GO:0010888)	0.480993	2.24525	0	0.0190452	0.567	11/16	24.19%	IL6;ITGB3;PPARG;PTPN2;ITGAV;PNPLA2;NR1H2;NFKBIA;ABCG1;TREM2;ABHD5	Micro
621	MSigDB_Hallmark_2020__Angiogenesis	0.431909	2.24331	0	0.0189699	0.573	12/23	14.02%	THBD;LPL;KCNJ8;VEGFA;TIMP1;SPP1;FSTL1;NRP1;PDGFA;VCAN;ITGAV;FGFR1	Micro
622	WikiPathway_2023_Human__Host Pathogen Interaction Of Human Coronaviruses Interferon Induction WP4880	0.376765	2.2382	0	0.0194206	0.586	22/32	35.86%	FOS;OAS3;OAS2;MYD88;IKBKE;IKBKG;IFNAR2;RIGI;NFKBIA;STAT1;TYK2;EIF2AK2;IFIH1;STAT2;IRF9;TRAF3;CHUK;NFKB1;MAVS;RIPK1;IFNAR1;MAPK14	Micro
623	GO_Biological_Process_2023__Neuron Projection Morphogenesis (GO:0048812)	-0.261232	-2.23758	0	0.00598991	0.53	63/132	30.46%	ADGRB1;BDNF;CDK5;NYAP1;NEFH;SHANK1;MAPK8IP2;CCK;PACSIN1;NRN1;BRSK2;NTNG1;SLITRK1;CNTNAP1;SHANK3;PAK3;FLRT3;TRIM46;TUNAR;FLRT1;EPHA4;ZNF365;CTTN;PLPPR4;SLITRK2;RAB3A;LLGL1;UBB;BRSK1;CELSR2;NYAP2;SSNA1;SLITRK4;EPHB3;ANK3;SLITRK3;MAP1A;DCDC2;NBL1;LRP2;MAP1B;DCLK1;GPM6A;CNTN4;SPAG6;NTNG2;PARD6B;MAP2;SPACDR;MAP6;S100A6;CTNND2;APLP1;SLITRK5;DCC;NCKAP1;NRCAM;FGFR2;ATL1;APBB1;S100B;CNTNAP2;MYO16	Micro
624	GO_Biological_Process_2023__Metal Ion Transport (GO:0030001)	-0.261427	-2.23261	0	0.00616032	0.544	62/127	27.59%	KCNS2;CCL3;KCNJ12;CHRNB2;KCNA4;CAV1;CHRNA4;ASIC1;KCNAB1;CCL8;KCNK3;KCNG1;KCNJ4;KCNV1;CACNG8;CLDN16;TRPC5;CACNG7;KCNJ6;KCNS3;KCNA3;KCNH3;CAMK2A;KCNK1;SCN3B;GRIN3A;TRPC3;SLC9B2;KCNF1;KCNA2;CACNG3;CCR5;KCNH1;KCNJ3;RAMP2;KCNMB2;KCNJ16;TRPC4;SCN2A;TUSC3;TRPV4;KCNB2;ATP2B2;SCN3A;KCNN1;KCNA1;SLC17A7;NDFIP2;LRP2;PSEN2;SCN8A;KCNN4;SCN1A;RYR2;CACNA2D1;NIPAL1;CNNM4;FYN;ATP2A3;KCNC1;SELENOK;MMGT1	Micro
625	GO_Cellular_Component_2023__Mitochondrial Proton-Transporting ATP Synthase Complex (GO:0005753)	-0.527454	-2.23117	0.00170068	0.00616556	0.549	15/16	43.29%	ATP5MF;ATP5MC3;ATP5MC1;ATP5PF;ATP5PO;ATP5MJ;ATP5F1D;ATP5ME;ATP5MK;ATP5F1B;ATP5F1E;ATP5PD;ATP5MG;ATP5PB;ATP5MC2	Micro
626	GO_Cellular_Component_2023__Proton-Transporting ATP Synthase Complex (GO:0045259)	-0.527454	-2.23117	0.00170068	0.00616556	0.549	15/16	43.29%	ATP5MF;ATP5MC3;ATP5MC1;ATP5PF;ATP5PO;ATP5MJ;ATP5F1D;ATP5ME;ATP5MK;ATP5F1B;ATP5F1E;ATP5PD;ATP5MG;ATP5PB;ATP5MC2	Micro
627	GO_Biological_Process_2023__Regulation Of Natural Killer Cell Mediated Cytotoxicity (GO:0042269)	0.518457	2.228	0	0.0207005	0.607	13/15	35.60%	SLAMF6;KLRD1;PVR;MICA;HLA-F;CADM1;NECTIN2;LILRB1;LGALS9;CD226;HLA-E;PIK3R6;ARRB2	Micro
628	WikiPathway_2023_Human__IL 4 Signaling Pathway WP395	0.320307	2.2266	0	0.0207	0.612	39/46	49.85%	SOCS3;JAK3;MAPK11;IL4R;PIK3R2;FOS;FLNA;CEBPB;PTPN6;STAT5A;AKT1;SHC1;NFKBIA;STAT1;TYK2;IRS2;STAT3;STAT6;SOCS5;CHUK;NFKB1;PTPN11;GRB2;STAT5B;MAPK14;PIK3CD;RPS6KB1;JAK2;PIK3R1;SOS1;EP300;MAPK1;CBL;ATF2;GAB2;IKBKB;JAK1;PIK3CA;INPP5D	Micro
629	WikiPathway_2023_Human__Oxidative Damage Response WP3941	0.341055	2.22534	0	0.0205878	0.615	26/38	34.87%	C1R;CDKN1A;MAPK13;TRAF1;BAK1;C5AR1;PCNA;C1QA;NFKBIE;MAPK10;C1QB;C2;C5;C1S;C1QC;TNFRSF1B;CASP9;TNK2;TRAF3;CDKN1B;C3AR1;NFKB1;BAG4;TDP2;BCL2;CDC42	Micro
630	GO_Biological_Process_2023__Response To Cytokine (GO:0034097)	0.248619	2.22194	0	0.0206806	0.621	58/103	34.63%	SLC11A1;IFNLR1;CXCR4;JAK3;IL1R1;CHI3L1;PLSCR1;FLT3;IFITM2;TIMP1;TIMP3;IFITM3;MX2;TRIM21;MX1;ISG15;SELL;HCLS1;BST2;OSMR;TRIM32;NFKB2;MYD88;HDAC4;ITIH4;IKBKE;GCH1;IRAK1;CD40;ALDH1A2;RELB;IFNAR2;MCL1;CXCL16;SHFL;STAT1;LGALS9;XAF1;PML;EIF2AK2;DDOST;BCL2L1;REL;MAP2K7;SP100;MAPKAPK3;CIITA;TRIM56;KYNU;ADAM9;CD74;NFKB1;CALCOCO2;CASP8;ADAR;IRAK3;BCL2;RIPK1	Micro
631	GO_Biological_Process_2023__Regulation Of Macrophage Derived Foam Cell Differentiation (GO:0010743)	0.463621	2.22154	0	0.0204629	0.623	14/18	34.05%	ALOX15B;ITGB3;AGT;PPARG;ITGAV;MSR1;ABCA5;NR1H2;NFKBIA;ABCG1;LCP1;PPARA;NFKB1;PRKCH	Micro
632	GO_Biological_Process_2023__Regulation Of T Cell Proliferation (GO:0042129)	0.303301	2.22055	0	0.0204476	0.63	29/52	28.48%	IL15;CD1D;SDC4;GPNMB;IL6;VSIG4;CR1;IL4I1;CD80;IL10;ARG1;RIPK3;LGALS3;TFRC;SLC7A1;CEBPB;NCK2;ZP3;PNP;SPN;MYDGF;LILRB1;PDCD1LG2;TNFRSF1B;TYK2;HLA-DMB;HLA-DRB1;HLA-DPA1;CD86	Micro
633	WikiPathway_2023_Human__Photodynamic Therapy Induced HIF 1 Survival Signaling WP3614	0.372499	2.2182	0.00254453	0.020468	0.632	18/31	24.98%	BCL2A1;SLC2A3;SERPINE1;VEGFA;HIF1A;PTGS2;TGFB3;BAK1;EGLN1;SLC2A1;ANGPT1;LDHA;ANGPT2;MCL1;BAX;HIF1AN;TGFA;BCL2L1	Micro
634	GO_Biological_Process_2023__Positive Regulation Of Type II Interferon Production (GO:0032729)	0.320863	2.21219	0	0.0210284	0.65	26/46	28.42%	SLC11A1;SLAMF6;IL1R1;FZD5;IL18R1;FADD;TNFSF4;SLC7A5;PTPN22;ISG15;PYCARD;TLR8;TXK;ZP3;BTN3A2;CD14;EBI3;MYDGF;LILRB1;HLA-A;LGALS9;TYK2;TLR3;CEBPG;HLA-DPA1;CD226	Micro
635	GO_Biological_Process_2023__Glutamate Receptor Signaling Pathway (GO:0007215)	-0.40303	-2.21153	0	0.0072154	0.603	21/32	29.43%	GRIN2C;GRM2;CDK5R1;KCNB1;GRIN2B;GRIN1;GRIN3A;GRIK4;PLCB1;GRIN2A;GRM3;GRIA2;GRM8;GRIA3;GRM7;GRM1;GRIA4;HOMER3;GRM5;CLN3;GRID2	Micro
636	GO_Biological_Process_2023__Peripheral Nervous System Development (GO:0007422)	-0.530871	-2.20883	0	0.00736281	0.613	12/16	28.38%	GPC1;SOX8;EGR2;ERBB3;ADGRG6;ADGRB2;SOX10;SCN8A;SERPINI1;ASIC2;PMP22;NFASC	Micro
637	GO_Biological_Process_2023__Generation Of Neurons (GO:0048699)	-0.261381	-2.20659	0	0.00744926	0.627	50/117	25.35%	CTF1;CDK5;NOVA2;DCX;WNT10B;MET;EMX1;CCK;EMX2;CDK5R1;BRSK2;ASCL1;SNPH;RNF112;MYT1L;POMGNT2;WNT5B;TRIM46;CELSR1;POU3F2;MAPT;NELL1;DNER;ASTN1;BRSK1;SEPTIN4;ERBB2;ATP2B2;MARK1;NGRN;FUT9;FZD4;LHX4;DCDC2;TAFA1;MAP1B;GPM6A;RELN;TUBB2B;ADGRL3;NLGN4X;SPOCK1;FZD3;FZD2;PIN1;FZD1;ITM2C;NR4A2;KIAA0319;DCC	Micro
638	GO_Biological_Process_2023__Positive Regulation Of Inflammatory Response (GO:0050729)	0.277613	2.20653	0.00265252	0.021747	0.665	36/75	25.60%	IL15;TLR2;S100A8;S100A9;OSM;NUPR1;AIM2;ADAM8;SERPINE1;IL6;PLA2G7;TNFSF4;IFI35;WNT5A;MAPK13;PTGER4;TRADD;PYCARD;AGT;OSMR;GPRC5B;VAMP8;ZP3;GSDMD;ETS1;NLRC4;NFKBIZ;GPSM3;SETD4;CASP1;CASP4;NFKBIA;EHHADH;IL17RA;TLR3;RPS19	Micro
639	WikiPathway_2023_Human__Mitochondrial Complex IV Assembly WP4922	-0.413317	-2.20595	0	0.00741833	0.629	21/30	34.76%	COX16;COX14;PET117;NDUFA4;COX8A;COA3;COX5B;HIGD1A;COA6;COX6A1;SURF1;COX5A;COX6B1;COX7A2;COX4I1;SMIM20;PET100;COX7C;TMEM177;COX6C;COX7B	Micro
640	GO_Biological_Process_2023__Acetylcholine Receptor Signaling Pathway (GO:0095500)	-0.537288	-2.20131	0	0.00773911	0.648	9/15	17.85%	CHRNB2;CHRM2;LY6H;LYPD1;CDK5R1;CHRM1;PLCB1;CHRM3;GNA11	Micro
641	WikiPathway_2023_Human__mRNA Processing WP411	0.22612	2.19846	0	0.02272	0.686	117/125	68.34%	SNRPD3;CSTF2;SF3A2;CPSF4;CLK2;SNRPA;PRPF4;PTBP1;SUGP1;SF3A1;SNRPF;EFTUD2;DHX38;PPM1G;XRN2;NONO;SF3A3;SRSF9;RNGTT;HNRNPL;U2AF1;PRPF3;DHX8;YBX1;PRPF8;CLASRP;CELF2;HNRNPA1;CPSF2;NCBP1;SRPK1;SUGP2;TMED10;RBM17;PCBP2;PRPF40A;SREK1;PRMT2;CSTF3;SRP54;DHX15;SRSF1;SF3B3;DICER1;HNRNPM;SRSF4;PRPF4B;HNRNPC;HNRNPA2B1;CELF1;RBM5;SFPQ;HNRNPU;PAPOLA;PTBP2;RBM39;DHX9;FUS;SRPK2;HNRNPD;HNRNPH1;CLK1;SPOP;HNRNPR;SFSW…	Micro
642	KEGG_2021_Human__Malaria	0.376002	2.19575	0.00530504	0.0229468	0.694	16/31	18.50%	TLR2;SDC2;IL6;ACKR1;THBS1;CR1;IL10;THBS4;CR1L;TGFB2;TGFB3;MYD88;THBS3;CD40;ITGAL;ICAM1	Micro
643	GO_Biological_Process_2023__Positive Regulation Of Response To External Stimulus (GO:0032103)	0.237236	2.19524	0	0.0227699	0.695	46/117	21.67%	IL15;TLR2;S100A8;S100A9;OSM;THBD;CD1D;BMP6;AIM2;ADAM8;PLSCR1;FADD;SERPINE1;PLA2G7;FPR2;TNFSF4;EMILIN2;IFI35;THBS1;IRGM;WNT5A;GBP5;PDGFRB;MAPK13;PTGER4;TRADD;PYCARD;TLR8;AGT;RNF31;SCIMP;GPRC5B;ZP3;GSDMD;SERPINF2;STX3;ETS1;NLRC4;NFKBIZ;GPSM3;POLR3G;SETD4;POLR3B;CASP1;CASP4;NFKBIA	Micro
644	GO_Biological_Process_2023__Potassium Ion Transmembrane Transport (GO:0071805)	-0.268176	-2.19369	0	0.00831417	0.67	45/100	22.86%	KCNS2;KCNJ12;KCNA4;KCNK3;KCNK2;KCNG1;KCNK12;KCNJ4;HCN2;KCNV1;KCNJ6;KCNS3;KCNJ9;KCNB1;KCNA3;KCNA7;KCNH3;ATP1A3;KCNK1;SLC12A1;ABCC9;KCNF1;KCNA2;SLC12A5;KCNQ2;KCNH1;KCNJ3;ABCC8;KCNJ16;KCNH5;KCNG3;HCN1;KCNB2;KCNN1;CCDC51;SLC24A2;KCNA1;KCNC2;KCNH7;KCND2;SLC9A5;KCNT2;KCNH8;HPN;KCNN4	Micro
645	GO_Molecular_Function_2023__G Protein-Coupled Amine Receptor Activity (GO:0008227)	-0.541343	-2.1917	0.00328407	0.00830867	0.676	11/15	24.11%	HTR1A;CHRM2;HRH3;HTR5A;HTR2C;HTR2B;HTR1F;HTR2A;CHRM3;HTR4;HTR1E	Micro
646	GO_Molecular_Function_2023__G Protein-Coupled Serotonin Receptor Activity (GO:0004993)	-0.541343	-2.1917	0.00328407	0.00830867	0.676	11/15	24.11%	HTR1A;CHRM2;HRH3;HTR5A;HTR2C;HTR2B;HTR1F;HTR2A;CHRM3;HTR4;HTR1E	Micro
647	GO_Cellular_Component_2023__Ribosome (GO:0005840)	-0.327092	-2.19144	0	0.00826583	0.677	39/57	40.84%	RPL18A;RPS5;RPL19;MRPS12;RPL36AL;RPL39;MRPS7;RPS4X;RPL13A;RPL41;RPS26;RPL10A;RPL32;RPS10;RPS23;RPL15;RPS11;RPL38;RPL8;RPS18;RPL11;RPL7A;RPS27;RPL24;RPS21;RPL27;RPS25;RPS7;RPS13;RPL6;RPL36;RPL9;BTF3;RPS3;RPS28;RPL18;HSPA14;MRPL13;RPL30	Micro
648	WikiPathway_2023_Human__Overview Of Proinflammatory And Profibrotic Mediators WP5095	-0.402996	-2.19138	0	0.00819917	0.677	15/32	10.87%	CTF1;CCL4L2;CCL3;IL17D;CCL2;TNF;IL1B;CCL8;CCL4;IL23A;CXCL13;CXCL14;IL1A;CX3CL1;CSF1	Micro
649	GO_Biological_Process_2023__Positive Regulation Of Leukocyte Mediated Cytotoxicity (GO:0001912)	0.381527	2.18731	0.00262467	0.0236796	0.712	17/28	29.14%	CD1D;SLAMF6;FADD;KLRD1;MICB;PVR;HFE;MICA;HLA-F;CADM1;HLA-B;HLA-C;NECTIN2;HLA-A;HLA-DRB1;CD226;HLA-E	Micro
650	GO_Biological_Process_2023__Mitochondrial Respiratory Chain Complex I Assembly (GO:0032981)	-0.338357	-2.18406	0.00159744	0.00858163	0.697	36/53	39.48%	NDUFC2;NDUFB11;NDUFB10;NDUFA13;NDUFB3;NDUFAB1;NDUFAF3;DMAC1;NDUFS8;NDUFA6;NDUFA11;NDUFB7;NDUFB5;TMEM126A;NDUFB8;DMAC2;NDUFAF4;NDUFB2;NDUFS3;NDUFA2;NDUFA8;NDUFAF1;NDUFA3;NDUFA9;NDUFB4;NDUFS5;NDUFS7;NDUFA1;NDUFS2;NDUFB1;NDUFC1;ECSIT;NDUFAF8;NDUFA5;NDUFB6;NDUFB9	Micro
651	GO_Biological_Process_2023__NADH Dehydrogenase Complex Assembly (GO:0010257)	-0.338357	-2.18406	0.00159744	0.00858163	0.697	36/53	39.48%	NDUFC2;NDUFB11;NDUFB10;NDUFA13;NDUFB3;NDUFAB1;NDUFAF3;DMAC1;NDUFS8;NDUFA6;NDUFA11;NDUFB7;NDUFB5;TMEM126A;NDUFB8;DMAC2;NDUFAF4;NDUFB2;NDUFS3;NDUFA2;NDUFA8;NDUFAF1;NDUFA3;NDUFA9;NDUFB4;NDUFS5;NDUFS7;NDUFA1;NDUFS2;NDUFB1;NDUFC1;ECSIT;NDUFAF8;NDUFA5;NDUFB6;NDUFB9	Micro
652	GO_Cellular_Component_2023__Catenin Complex (GO:0016342)	-0.439556	-2.1839	0.00333333	0.00851406	0.697	18/24	35.22%	CDH13;CDH7;CDH22;APC2;CDH2;CDH4;CDH9;CDH3;CDH11;CDH12;JUP;CDHR3;CDH8;CDH6;CDH23;CDH10;CDH18;CTNNA2	Micro
653	GO_Biological_Process_2023__Fc-gamma Receptor Signaling Pathway (GO:0038094)	0.413982	2.18367	0	0.0240492	0.717	15/23	32.54%	FGR;FCGR2B;MYO1G;FCGR3A;VAV3;CD247;YES1;PLA2G6;FCER1G;PRKCE;PLD2;LIMK1;PTK2;VAV2;PRKCD	Micro
654	GO_Biological_Process_2023__Synaptic Transmission, Glutamatergic (GO:0035249)	-0.439414	-2.17996	0.0016835	0.00874436	0.708	16/25	24.81%	GRIN2C;UNC13A;SLC17A6;GRIN2B;GRIN3A;UNC13C;GRIK4;GRIA1;GRIK5;GRIN2A;SLC17A7;GRIA2;GRIA3;GRID1;CDHR3;GRIA4	Micro
655	GO_Biological_Process_2023__Pyroptosis (GO:0070269)	0.443955	2.17608	0.00240964	0.025099	0.732	15/20	31.92%	IFI27;TRIM21;PYCARD;GSDMD;CASP6;NLRC4;CASP1;CASP4;TREM2;APIP;GSDME;NAIP;MAP3K20;DPP9;CASP8	Micro
656	GO_Biological_Process_2023__Regulation Of Defense Response To Virus By Host (GO:0050691)	0.365918	2.17586	0.00246914	0.0248738	0.733	16/32	21.97%	IFNLR1;TRIM6;ZDHHC11;PTPN22;PARP9;MICB;APOBEC3F;TNFAIP3;TARBP2;DTX3L;APOBEC3G;TRAF3IP2;MUL1;RIGI;LILRB1;STAT1	Micro
657	GO_Biological_Process_2023__Calcium-Dependent Cell-Cell Adhesion Via Plasma Membrane Cell Adhesion Molecules (GO:0016339)	-0.439161	-2.17279	0	0.00926562	0.729	21/26	36.20%	PCDHB10;CDH13;PCDHB14;PCDHB9;CDH7;CDH22;PCDHB4;CDH2;CDH4;CDH9;CDH3;CDH11;PCDHB5;CDH12;CDHR3;CDH8;CDH6;CDH23;CDH10;CDH18;NLGN1	Micro
658	GO_Molecular_Function_2023__Calcium-Dependent Phospholipid Binding (GO:0005544)	-0.374778	-2.17271	0.00169492	0.00920604	0.73	19/38	19.14%	SYT10;ESYT3;MCTP2;CPNE6;SYT5;DOC2B;SYT7;SYT13;ANXA6;DYSF;RPH3A;ANXA3;SYT3;CPNE5;SYT4;CPNE9;SYT1;CPNE8;PLA2G4C	Micro
659	GO_Cellular_Component_2023__AMPA Glutamate Receptor Complex (GO:0032281)	-0.488582	-2.17212	0.00350263	0.00915896	0.732	14/19	27.52%	SHISA7;CACNG8;CACNG7;CACNG5;VWC2L;CACNG3;VWC2;SHISA6;GRIA1;SHISA9;GRIA2;GRIA3;GRIA4;OLFM2	Micro
660	WikiPathway_2023_Human__Microglia Pathogen Phagocytosis Pathway WP3937	0.331362	2.17152	0	0.0253112	0.738	29/39	42.12%	TREM1;VAV3;PIK3R2;SIGLEC7;FCGR1A;PIK3R3;RAC2;PTPN6;C1QA;FCER1G;C1QB;NCF4;C1QC;TREM2;CYBB;NCF2;CYBA;VAV2;ITGB2;PIK3R6;PIK3CD;HCK;PIK3CB;PIK3C3;PIK3C2A;NCKAP1L;LYN;SYK;PIK3R1	Micro
661	GO_Biological_Process_2023__Nuclear Transport (GO:0051169)	0.348324	2.16723	0	0.0258317	0.749	33/37	50.77%	NUP210;NUP62;NUP188;SEH1L;RAE1;GLE1;NUP37;NUP43;NUP155;NUP160;SEC13;NUP35;NUP58;NDC1;NUP85;NUP93;NUP107;NUP153;NUP205;NUP54;NUP88;ANP32A;NUP98;NUP133;RSRC1;AHCTF1;XPO1;NUP214;TPR;POM121;RANBP2;NUP42;NUP50	Micro
662	GO_Biological_Process_2023__Regulation Of Neuronal Synaptic Plasticity (GO:0048168)	-0.392486	-2.16472	0	0.00965947	0.754	16/33	17.14%	GRIN2C;SHISA7;SLC8A2;CAMK2A;GRIN2B;GRIN1;CAMK2B;NETO1;DBN1;RAB3A;NCDN;SHISA6;GRIN2A;PPFIA3;SYP;SHISA9	Micro
663	GO_Biological_Process_2023__Neurotransmitter Transport (GO:0006836)	-0.355115	-2.16415	0	0.00965541	0.756	23/41	24.29%	SLC32A1;SLC1A6;UNC13A;SLC29A4;HRH3;SNPH;SLC17A6;NRXN2;PDZD11;SYN2;SNAP25;SLC38A1;SYN1;BRSK1;LIN7B;GABRA2;PPFIA3;SYT1;SLC17A7;SLC29A2;STXBP1;NRXN1;LIN7A	Micro
664	GO_Biological_Process_2023__Regulation Of Immune Response (GO:0050776)	0.296061	2.16224	0	0.0266007	0.762	15/54	9.11%	FGR;IL15;FCGR2B;BCL6;PLSCR1;FCGR3A;TNFSF4;IL4I1;PTPN22;TGFB2;FCGR1A;DHX58;IRF7;RIPK3;RSAD2	Micro
665	GO_Biological_Process_2023__Regulation Of Monoatomic Ion Transmembrane Transporter Activity (GO:0032412)	-0.311384	-2.16157	0	0.00983853	0.765	28/62	21.13%	CRH;FXYD1;SCN2B;SHANK1;SHISA7;HCN2;CACNG8;MAPK8IP2;CACNG2;TRPC6;CACNG7;CACNG5;SCN3B;FHL1;PRRT1;CACNG3;FXYD6;SHISA6;HCN1;CHRM3;STK39;PTPN3;GSG1L;SHISA9;FXYD7;YWHAH;RELN;FGF12	Micro
666	KEGG_2021_Human__TNF signaling pathway	0.243011	2.16033	0	0.0265657	0.765	37/93	24.12%	SOCS3;IL15;NOD2;MAP3K8;BCL3;MAPK11;IL18R1;FADD;IL6;PIK3R2;FOS;PIK3R3;PGAM5;VEGFD;MAPK13;PTGS2;RIPK3;TRADD;TNFAIP3;TRAF1;DAB2IP;CEBPB;MAP2K3;CREB5;MMP14;IKBKG;CASP7;MAPK10;ICAM1;IRF1;MLKL;AKT1;FAS;NFKBIA;TNFRSF1B;ATF6B;ATF4	Micro
667	WikiPathway_2023_Human__Hematopoietic Stem Cell Gene Regulation By GABP Alpha Beta Complex WP3657	0.43855	2.15956	0	0.0264117	0.768	19/19	56.21%	FLT3;DNMT3B;MCL1;ETV6;BCL2L1;GABPB1;TERF2;BCL2;EP300;CREBBP;SMAD4;ATM;PTEN;ZFX;SMARCA4;GABPA;DNMT3A;FOXO3;DNMT1	Micro
668	GO_Molecular_Function_2023__Chloride Channel Activity (GO:0005254)	-0.35008	-2.15667	0	0.0100865	0.777	25/48	23.44%	FXYD1;GABRA6;GABRA4;GABRA5;SLC17A6;GLRA3;CLDN4;CLCN2;ANO5;GLRA2;GABRG3;GABRG1;GLRB;GABRB1;GABRA1;GABRA3;TTYH1;GABRA2;GABRG2;SLC17A7;ANO3;GABRB2;KCNT2;GABRB3;SLC26A8	Micro
669	WikiPathway_2023_Human__Complement System In Neuronal Development And Plasticity WP5090	0.257025	2.15141	0	0.0275793	0.783	34/79	22.44%	CFB;PLSCR1;CRB1;CR1;ATP10A;C1R;TGFB2;ITGB3;PARD6G;MFGE8;TGFB3;CFD;PARD3;COLEC12;BAK1;ITGAV;C5AR1;SUSD4;ATP11A;ATP8B3;C1QA;SERPING1;CASP7;C1QB;C2;C5AR2;PROS1;C5;CD55;BAX;C1S;FAS;C1QC;GAS6	Micro
670	GO_Biological_Process_2023__Mitochondrial Gene Expression (GO:0140053)	-0.264549	-2.14841	0	0.010694	0.794	74/101	48.92%	NDUFA7;MRPL54;MRPL9;POLRMT;MRPL12;MRPL40;MRPL28;MRPL55;GADD45GIP1;MRPL23;MRPL34;MRPS33;MRPL17;MRPL27;MRPL43;MRPS15;MRPL10;CHCHD1;MRPL51;MRPL36;MRPL24;MRPL11;MRPS28;MRPS12;MRPS7;MRPS6;FASTK;MRPL4;MRPS34;MRPL41;MRPL44;MRPS18A;MRPL2;MRPL50;MRPL14;MRPL30;MRPL35;MRPL21;MRPS14;FASTKD5;MRPS16;MRPL16;MRPL18;MRPL57;MRPL58;MRPL37;MRPS18C;MRPS10;MRPS30;MRPS23;MRPL52;MRPL33;TFAM;MRPS22;MRPL47;MRPL20;MRPL48;M…	Micro
671	WikiPathway_2023_Human__NRXN1 Deletion Syndrome WP5398	-0.525427	-2.14772	0	0.0106603	0.796	12/16	24.81%	GRIN2C;GRIN2B;GRIN1;GRIN3A;GRIA1;GRIN2A;GRIA2;NLGN3;NLGN4X;GRIA3;NRXN1;GRIA4	Micro
672	GO_Biological_Process_2023__Glycosphingolipid Biosynthetic Process (GO:0006688)	-0.501444	-2.14557	0	0.0107978	0.804	9/17	14.98%	B4GALNT1;ST8SIA6;ST6GALNAC5;ST8SIA1;ST8SIA3;ST6GALNAC6;B4GALT6;ST8SIA5;FUT9	Micro
673	MSigDB_Hallmark_2020__Coagulation	0.248557	2.13979	0.002849	0.0296452	0.808	39/89	23.01%	THBD;CFB;SERPINE1;CAPN5;THBS1;RAPGEF3;ITGA2;MEP1A;TIMP1;GNG12;TIMP3;RGN;C1R;SERPINA1;SH2B2;ITGB3;S100A13;S100A1;CFD;F3;MST1;GNB2;APOC1;FURIN;MAFF;MMP14;CSRP1;C1QA;FBN1;SERPING1;PEF1;C2;CTSK;PROS1;ISCU;C1S;CTSB;F8;LTA4H	Micro
674	GO_Biological_Process_2023__Calcium Ion Transmembrane Import Into Cytosol (GO:0097553)	-0.305326	-2.13856	0	0.011398	0.819	32/64	25.79%	CACNA1G;GRIN2C;JPH2;JPH4;F2R;PLCH2;HTR2C;SLC8A2;FGF2;SLC8A3;GRIN2B;GRIN1;JPH3;HTR2B;HTR2A;SCN2A;TRPV4;JPH1;SCN3A;PLCB1;GRIN2A;SLC24A2;PLCH1;PLCB4;CACNA1E;PLCD1;SCN8A;SCN1A;CHERP;RYR2;CACNA2D1;PLCB3	Micro
675	GO_Biological_Process_2023__Neuron Development (GO:0048666)	-0.250593	-2.13801	0	0.0113708	0.82	49/132	20.78%	CDK5;NOVA2;UNC5A;NPY;LGI1;CDK5R1;ALK;GPRIN1;ASCL1;SAMD14;ADCYAP1;PBX4;BLOC1S1;MYT1L;L1CAM;PQBP1;FLRT3;ATCAY;PPP1R9A;STMN2;POU3F2;MAPT;TENM3;RASGRF1;EPHA5;NCDN;PBX1;BICDL1;RAB6B;B4GALT6;ETV1;SRF;BLOC1S3;TENM1;ATP8A2;TBC1D24;STMN4;SH3GL2;MAP1B;SRRM4;MICALL1;ROBO2;BLOC1S4;GPM6A;CNTN4;GLI2;LAMB1;FRY;STMN1	Micro
676	GO_Biological_Process_2023__Regulation Of Cytokine Production Involved In Immune Response (GO:0002718)	0.449523	2.13712	0.00471698	0.0297826	0.811	12/18	24.65%	NOD2;TRIM6;SLC7A5;IL10;WNT5A;TNFRSF14;SPHK2;SCIMP;LACC1;LILRB1;TNFRSF1B;IRF5	Micro
677	GO_Biological_Process_2023__Response To Lipopolysaccharide (GO:0032496)	0.228837	2.13464	0	0.0299315	0.814	45/115	22.84%	SLC11A1;NOD2;S100A8;S100A9;GBP2;TRIM6;NOS1;SERPINE1;SHPK;IL6;TNFSF4;PTPN22;CD80;IL10;CD68;IRGM;WNT5A;CPS1;ZFP36;TNFAIP3;PYCARD;CARD16;DAB2IP;MYD88;NFKBIB;NOCT;SBNO2;GCH1;IRAK1;GBP3;CASP7;HMGB2;SRR;CD14;LILRB1;LIAS;VIM;CASP1;PDCD1LG2;XBP1;LGALS9;FOXP1;TRIB1;EHHADH;TNFRSF1B	Micro
678	GO_Molecular_Function_2023__Cell Adhesion Mediator Activity (GO:0098631)	-0.444763	-2.13309	0.0017301	0.0118452	0.83	18/23	37.14%	NTNG1;CD200;ROBO4;CNTN2;CLSTN3;CNTN6;CNTN4;CNTN1;ROBO3;JAM3;NRCAM;NFASC;CNTN5;NEXN;DSCAM;BCAT2;EMB;NINJ1	Micro
679	MSigDB_Hallmark_2020__Allograft Rejection	0.216556	2.13084	0	0.0304892	0.821	90/143	41.34%	FGR;IL15;TLR2;FCGR2B;BCL3;GBP2;CD1D;CD96;IL6;IL4R;DYRK3;GPR65;CD80;IL10;TIMP1;STAT4;TGFB2;KLRD1;HIF1A;CD247;IRF7;FLNA;HCLS1;TAP1;IL27RA;HLA-DQA1;EIF5A;HLA-DOA;SRGN;PTPN6;MAP4K1;CCND3;CD40;TAP2;ITGAL;IFNAR2;ETS1;LY75;WARS1;LCP2;ICAM1;C2;HLA-DMA;STAB1;NCF4;ICOSLG;AKT1;FAS;HLA-A;STAT1;WAS;B2M;CDKN2A;GCNT1;RPS9;TLR3;RPS19;HLA-DMB;EIF3D;IRF8;SOCS5;CD86;HLA-E;RIPK2;BCAT1;CD74;ITGB2;DARS1;CD47;RARS1;MTI…	Micro
680	GO_Molecular_Function_2023__G Protein-Coupled Receptor Activity (GO:0004930)	-0.25524	-2.13029	0	0.0120882	0.842	45/117	16.47%	NPFFR2;ADGRB1;ADGRA1;OPRD1;GALR1;GRM2;GPR52;CNR1;F2R;PTH1R;ADGRL4;GPR83;NPY;P2RY13;LGR5;MCHR2;GPR26;GPR61;CX3CR1;GABBR1;ADGRF3;CYSLTR1;ADORA1;P2RY1;ADGRG2;MAS1;VIPR1;GPR27;TAS1R1;DRD1;GPR63;GPR22;FFAR4;ADGRG6;ADGRB2;CELSR2;RORB;GABBR2;ADGRE3;RXFP1;ADGRF5;GPR176;GPR75;TSHR;GRM3	Micro
681	KEGG_2021_Human__Viral carcinogenesis	0.200409	2.13004	0	0.0303749	0.824	76/164	31.92%	JAK3;H2BC14;CCR3;H2BC9;CCNA1;H2BC15;H2BC12;H2BC11;H2BC4;PIK3R2;H2BC8;CDKN1A;H2BC7;H2BC5;PIK3R3;H2BC21;IRF7;H2BC18;TRADD;CDK2;SCIN;CHEK1;TRAF1;H2BC6;CDKN2B;GTF2A2;PXN;H4C8;NFKB2;BAK1;HDAC4;CREB5;HLA-F;IKBKG;MRPS18B;STAT5A;CCND3;HLA-B;HDAC11;CCND1;HLA-C;BAX;HLA-A;HDAC6;NFKBIA;HDAC7;RBPJ;ATF6B;CDKN2A;EIF2AK2;HDAC1;ATF4;IRF9;SND1;CHD4;REL;HDAC8;GTF2E1;SP100;LTBR;STAT3;ACTN4;HDAC3;VAC14;TRAF3;DNAJA3;H…	Micro
682	WikiPathway_2023_Human__Synaptic Vesicle Pathway WP2267	-0.338916	-2.12885	0.00159744	0.0121738	0.846	22/46	21.80%	SLC32A1;STX1B;CPLX1;UNC13A;SLC17A6;STX1A;SYN2;SNAP25;SLC38A1;UNC13C;SYN1;RAB3A;SLC18A1;SLC25A4;AP2S1;SYP;SYT1;SLC17A7;VAMP2;CPLX2;STXBP1;RIMS1	Micro
683	KEGG_2021_Human__Taste transduction	-0.347457	-2.12884	0.00157233	0.0120892	0.846	27/45	27.63%	GABRA6;HTR1A;HTR3B;TRPM5;GABRA4;GABRA5;GABBR1;SCNN1A;P2RY1;TAS2R31;TAS1R1;HTR1F;SCN2A;GABRA1;GABBR2;PDE1C;GABRA3;GABRA2;SCN3A;PLCB1;CHRM3;PLCB4;HTR1E;GRM1;ASIC2;PLCB3;PDE1A	Micro
684	GO_Molecular_Function_2023__Cell-Cell Adhesion Mediator Activity (GO:0098632)	-0.38149	-2.12816	0.00164474	0.012053	0.848	22/34	32.06%	CDC42EP1;NTNG1;CD200;ROBO4;STXBP6;EPCAM;CNN3;BAIAP2L1;CNTN2;CLSTN3;PPP1CA;CNTN6;CNTN4;CNTN1;ROBO3;JAM3;NRCAM;NFASC;CNTN5;NEXN;PAK4;DSCAM	Micro
685	GO_Biological_Process_2023__Fatty Acid Transport (GO:0015908)	0.418559	2.12794	0.00244499	0.0305829	0.83	11/21	19.15%	SLC22A1;ACSL1;RBP7;SLC27A3;PMP2;SLCO3A1;SLC27A6;PPARG;MFSD2A;SLC27A4;PPARD	Micro
686	GO_Biological_Process_2023__Positive Regulation Of Cytokine Production (GO:0001819)	0.184778	2.12753	0	0.0303459	0.831	91/238	25.57%	FGR;IL15;SLC11A1;TLR2;NOD2;OSM;ALOX15B;SLAMF6;IL1R1;MAPK11;TRIM6;CHI3L1;FZD5;IL18R1;FADD;SERPINE1;IL6;TNFSF4;HSPA1B;HILPDA;SLC7A5;PTPN22;CD80;IL10;SULF1;BATF;HMOX1;PLA2R1;CYP1B1;HIF1A;ISG15;WNT5A;GBP5;DHX58;MAPK13;IRF7;PTGS2;S100A13;PTGER4;PYCARD;TLR8;AGT;HPSE;TXK;TNFRSF14;CEBPB;POU2F2;MYD88;IKBKE;CADM1;CCBE1;SPHK2;SCIMP;AGPAT2;IRAK1;ZP3;SERPINF2;NFAM1;CD58;FCER1G;CD40;LACC1;PNP;BTN3A2;IRF1;CD14;…	Micro
687	MSigDB_Hallmark_2020__Complement	0.208878	2.1271	0	0.0301137	0.832	58/158	22.18%	S100A9;PIM1;CFB;CPM;COL4A2;PLSCR1;DUSP5;SERPINE1;LAP3;IL6;PLA2G7;CASP5;CR1;EHD1;TIMP1;C1R;SERPINA1;PHEX;IRF7;APOBEC3F;S100A13;LGALS3;TNFAIP3;PSMB9;SIRT6;PLAUR;F3;CEBPB;GNB2;APOC1;CTSD;MAFF;GCA;MMP14;CSRP1;C1QA;SERPING1;FCER1G;KCNIP2;DGKG;CASP7;APOBEC3G;PFN1;LCP2;C2;GPD2;IRF1;PPP4C;CD55;C1S;ZFPM2;CASP1;CASP4;C1QC;CTSB;DGKH;F8;WAS	Micro
688	KEGG_2021_Human__Asthma	0.487492	2.12507	0	0.0303586	0.838	12/15	27.39%	HLA-DQB1;IL10;HLA-DQA1;HLA-DOA;HLA-DRB5;FCER1G;CD40;HLA-DMA;HLA-DPB1;HLA-DMB;HLA-DRB1;HLA-DPA1	Micro
689	GO_Biological_Process_2023__Mononuclear Cell Differentiation (GO:1903131)	0.439108	2.1245	0	0.0302645	0.842	11/19	23.19%	FLT3;VEGFA;MT1G;PPARG;RELB;THOC5;PIR;LILRB1;PDE1B;GAS6;TREM2	Micro
690	GO_Biological_Process_2023__Long-Term Memory (GO:0007616)	-0.496253	-2.12219	0.00173611	0.0124753	0.859	8/16	11.75%	CALB1;LRRC66;SHANK1;CAMK4;LDLR;CAMK2N1;RGS14;RASGRF1	Micro
691	GO_Molecular_Function_2023__Voltage-Gated Monoatomic Cation Channel Activity (GO:0022843)	-0.309036	-2.12157	0.00164745	0.0124473	0.86	34/59	30.34%	KCNS2;CACNA2D2;KCNA4;HCN2;KCNV1;CACNG8;CACNG2;CACNG7;KCNS3;CACNG5;KCNH3;KCNK1;KCNF1;KCNA2;CACNG3;TMC2;KCNQ2;KCNH5;HCN1;NCS1;KCNA1;KCNC2;CACNA1E;KCND2;KCNH8;CACNB2;CACNA2D3;HVCN1;CACNA2D1;KCNC1;CACNB1;KCNQ5;KCNC4;OPRM1	Micro
692	GO_Biological_Process_2023__Cell-Cell Junction Assembly (GO:0007043)	-0.313743	-2.11926	0	0.0125891	0.864	37/58	40.13%	CDH13;PKP2;ARVCF;CDH7;GJC1;CNTNAP1;MPDZ;CDH22;RAMP2;CLDN11;TRPV4;CDH2;CDH4;ZNF703;FBF1;CDH9;CDH3;CDH11;CDH12;CD9;PARD6B;JUP;CTNND2;CDHR3;RHOC;JAM3;CLDN12;ACTG1;CDH8;CDH6;CDH10;CDH18;FSCN1;PATJ;SMAD7;RHOA;VCL	Micro
693	GO_Biological_Process_2023__Myelination (GO:0042552)	-0.35121	-2.11893	0.00162866	0.0125352	0.865	22/44	21.18%	TNFRSF21;AMIGO1;GPC1;MARVELD1;MAL;SLC8A3;CNTNAP1;MAL2;CMTM8;TPPP;ABCD2;ADGRG6;B4GALT6;SOX10;SCN2A;MPZ;BCAS1;GAL3ST1;ACSBG1;EIF2B2;PLP1;SCN8A	Micro
694	GO_Biological_Process_2023__Inflammatory Response (GO:0006954)	0.213827	2.11761	0	0.0312847	0.851	70/142	31.30%	SLC11A1;SIGLEC1;TLR2;S100A8;FCGR2B;S100A9;CXCR4;PTGER3;CCR3;CHI3L1;FPR3;ADAM8;F11R;VNN1;CD96;TAC4;IL6;PTGIR;FPR2;CD44;TNFSF4;ACKR1;THBS1;FOS;ADGRE5;LTB4R;WNT5A;ADCY8;HYAL1;PTGER4;TACR1;FPR1;IL10RB;CEBPB;NFKB2;HDAC4;C5AR1;NFAM1;IKBKG;CD40;APOL2;RELB;ITGAL;LY75;NLRC4;TRAF3IP2;C5AR2;MFHAS1;CD14;KLRG1;LIAS;LGALS9;ADORA3;CYBB;TLR3;TLR5;REL;STAT3;CYBA;TLR10;CMKLR1;PXK;NAIP;CHUK;CIITA;TPST1;RIPK2;C3AR1;…	Micro
695	KEGG_2021_Human__Diabetic cardiomyopathy	-0.233419	-2.11285	0	0.0131558	0.878	102/165	44.00%	MAPK12;NDUFA7;NDUFA4L2;CAMK2A;CAMK2B;COX7A1;NDUFA4;IRS1;UQCRHL;PRKCG;NDUFC2;SLC25A4;NDUFB11;NDUFB10;COX8A;NDUFV2;MMP2;COX5B;PLCB1;NDUFA13;TBC1D4;UQCR11;COX6A1;PLCB4;PPP1CA;NDUFB3;ATP5MC3;NDUFAB1;ATP5MC1;COX5A;NCF1;ATP5PF;UQCRB;PDK2;COX6B1;ATP5PO;NDUFS8;CYC1;PLN;UQCRFS1;COX7A2;NDUFA6;GAPDH;UQCRC1;ATP5F1D;RYR2;COX4I1;NDUFA11;SLC25A5;NDUFB7;PLCB3;ATP2A3;UQCR10;NDUFB5;PRKCZ;UQCRQ;NDUFB8;COX7C;NDUFB2;…	Micro
696	GO_Biological_Process_2023__Negative Regulation Of Cell Projection Organization (GO:0031345)	-0.332688	-2.11172	0	0.0131743	0.88	24/47	26.21%	STX1B;FKBP4;MAG;TNR;DPYSL5;RTN4R;DPYSL3;GRIN2B;RTN4RL2;EPHA4;ZNF365;STMN2;CRMP1;TRPV4;EFNB2;KANK1;YWHAH;PTPRS;CIB1;SPOCK1;ITM2C;DCC;GORASP1;FYN	Micro
697	GO_Biological_Process_2023__Chloride Transmembrane Transport (GO:1902476)	-0.351337	-2.11091	0	0.0131526	0.881	19/40	17.93%	GABRA6;GABRA4;GABRA5;SLC12A1;GLRA3;ANO5;SLC12A5;GLRA2;GABRG3;GABRG1;GLRB;GABRB1;GABRA1;GABRA3;GABRA2;GABRG2;ANO4;ANO3;GABRB2	Micro
698	GO_Biological_Process_2023__Regulation Of Type II Interferon Production (GO:0032649)	0.268159	2.11036	0	0.0324299	0.871	34/66	28.42%	SLC11A1;SLAMF6;IL1R1;FZD5;IL18R1;FADD;TNFSF4;CR1;SLC7A5;PTPN22;ISG15;IRGM;RIPK3;PYCARD;TLR8;TXK;ZP3;BTN3A2;CD14;EBI3;MYDGF;LILRB1;BTN3A1;HLA-A;PDCD1LG2;LGALS9;GAS6;TYK2;TLR3;CEBPG;HLA-DRB1;VSIR;HLA-DPA1;CD226	Micro
699	GO_Biological_Process_2023__Amide Transport (GO:0042886)	0.370266	2.10796	0	0.0326697	0.875	11/26	10.39%	SLC14A1;SLC14A2;SLC38A5;PLTP;PDPN;SLC1A3;SLC1A1;TAP1;AQP11;GJA1;SLC5A6	Micro
700	GO_Biological_Process_2023__Xenobiotic Transport (GO:0042908)	0.452126	2.1076	0.00475059	0.0325189	0.875	9/17	13.26%	SLC22A1;SLC47A1;ABCC3;SLC22A4;SLC7A5;ABCC2;GJA1;ABCB1;SLC31A1	Micro
701	GO_Molecular_Function_2023__Regulatory RNA Binding (GO:0061980)	0.355469	2.10478	0	0.0328555	0.88	31/33	54.78%	MATR3;SOX2;DND1;TARBP2;ZC3H10;DDX21;PNPT1;RBM10;ZNF346;YBX1;HNRNPA1;AGO4;ZC3H7B;AGO2;ELAVL1;RBM4;TUT7;ZC3H7A;TUT4;DICER1;FAM172A;AGO3;PUM1;PUM2;HNRNPA2B1;RC3H1;DHX9;FMR1;PIWIL4;TLR7;PRKRA	Micro
702	GO_Biological_Process_2023__Pattern Recognition Receptor Signaling Pathway (GO:0002221)	0.301579	2.10278	0	0.0331733	0.883	40/45	57.63%	TLR2;NOD2;ALPK1;DHX58;TRIM25;PYCARD;TLR8;TIFA;IRAK1;LACC1;NLRC4;CD14;RIGI;CASP1;EHHADH;IFIH1;TLR3;TLR5;MAPKAPK3;TLR10;TRAF3;NAIP;RPS6KA3;LY96;MAVS;TLR1;IRAK4;TLR6;CTSS;TBK1;MAP3K7;TRAF6;IPO5;TLR7;MAPKAPK2;BCL10;PLCG2;CGAS;TICAM1;NOD1	Micro
703	GO_Biological_Process_2023__Chemokine-Mediated Signaling Pathway (GO:0070098)	-0.473661	-2.10079	0	0.014204	0.9	11/19	21.86%	CCL3;CCL2;CCL8;CCL4;CXCL13;CX3CL1;GPR75;CCL20;STK39;CXCL12;CIB1	Micro
704	GO_Biological_Process_2023__Cellular Response To Alcohol (GO:0097306)	0.325232	2.09877	0	0.0337483	0.887	16/39	16.36%	GRAMD1C;TNFSF4;SCNN1D;AKR1C3;CDH1;ADCY3;ADCY8;BLM;PTGER4;ADCY2;ADCY6;ADCY5;GPLD1;SPHK2;CFTR;MAP4K1	Micro
705	KEGG_2021_Human__Calcium signaling pathway	-0.224145	-2.09134	0	0.0152219	0.917	78/172	28.75%	CACNA1G;GRIN2C;PDGFRA;ATP2B3;FGF17;FGF5;FGF9;CHRM2;CCKBR;F2R;ITPKA;MET;CAMK1G;ADRA1B;TRDN;P2RX5;HTR5A;HTR2C;EDNRA;SLC8A2;FGF2;CAMK2A;ADRA1A;SLC8A3;GRIN1;CAMK4;CYSLTR1;CAMK2B;ADCY1;CAMK1;ERBB3;DRD1;CHRM1;HTR2B;HTR2A;PRKCG;SLC25A4;PDE1C;ERBB2;HRH1;MST1R;CALM3;ATP2B2;EGF;PLCB1;EGFR;CHRM3;GRIN2A;CALM1;FGF7;PLCB4;FGF1;MYLK;GNA11;PHKA1;HTR4;CACNA1E;PHKG1;ADRB1;PLCD1;PLN;GNAL;CALM2;GRM1;NTRK3;FGF20;RYR2…	Micro
706	WikiPathway_2023_Human__SARS Coronavirus And Innate Immunity WP4912	0.480422	2.09089	0.00478469	0.0352313	0.897	13/15	39.55%	IKBKE;IFNAR2;RIGI;STAT1;TYK2;IFIH1;STAT2;IRF9;TLR3;TRAF3;MAVS;IFNAR1;TBK1	Micro
707	GO_Cellular_Component_2023__Polysomal Ribosome (GO:0042788)	-0.404783	-2.08785	0.00170358	0.0156189	0.923	20/27	40.84%	RPL18A;RPL19;RPL36AL;RPL39;RPL41;RPS26;RPL10A;RPL32;RPS23;RPL38;RPL8;RPL11;RPL7A;RPL24;RPS21;RPL6;RPL36;RPS28;RPL18;RPL30	Micro
708	GO_Biological_Process_2023__Mitochondrial Respiratory Chain Complex Assembly (GO:0033108)	-0.277453	-2.08332	0.00308166	0.0160058	0.926	59/87	44.38%	COX16;COX14;PET117;NDUFC2;NDUFB11;NDUFB10;COA3;NDUFA13;NDUFB3;CHCHD4;SURF1;NDUFAB1;NDUFAF3;DMAC1;NDUFS8;SDHAF2;UQCRFS1;NDUFA6;SDHAF1;NDUFA11;NDUFB7;SMIM20;TMEM223;PET100;NDUFB5;TMEM126A;NDUFB8;DMAC2;NDUFAF4;NDUFB2;UQCC2;NDUFS3;NDUFA2;NDUFA8;NDUFAF1;NDUFA3;NDUFA9;NDUFB4;NDUFS5;NDUFS7;NDUFA1;NDUFS2;NDUFB1;NDUFC1;OMA1;ECSIT;SDHAF4;NDUFAF8;NDUFA5;NDUFB6;SAMM50;COX17;NDUFB9;LYRM7;STMP1;LYRM2;COA5;COX1…	Micro
709	WikiPathway_2023_Human__Prostaglandin Synthesis And Regulation WP98	0.34323	2.08281	0	0.036614	0.906	14/32	15.28%	ANXA2;PTGER3;HSD11B1;PTGIR;AKR1C3;S100A10;EDNRB;PPARGC1A;PTGS2;SOX9;PTGER4;PPARG;PTGFRN;MITF	Micro
710	GO_Biological_Process_2023__Regulation Of Phagocytosis (GO:0050764)	0.31197	2.08051	0.00503778	0.0369238	0.912	25/42	33.49%	FGR;IL15;SLC11A1;TLR2;FCGR2B;TGM2;PLSCR1;FPR2;SIRPB1;PYCARD;LYAR;ITGAV;FCER1G;IL15RA;GAS6;TREM2;RAB27A;RACK1;CYBA;MERTK;PIP4P2;LETMD1;LMAN2;CLEC7A;CD47	Micro
711	GO_Biological_Process_2023__Positive Regulation Of Transcription By RNA Polymerase III (GO:0045945)	0.482489	2.08051	0.0021645	0.0365999	0.912	15/15	51.80%	MYBBP1A;DDX21;ERCC6;ZC3H8;ELL;MTOR;ZNF143;RPTOR;CHD8;DEK;ICE1;ICE2;BAZ1B;SF3B1;SMARCA5	Micro
712	GO_Biological_Process_2023__Chaperone-Mediated Protein Complex Assembly (GO:0051131)	-0.459084	-2.07763	0.00348432	0.0166008	0.932	16/19	43.66%	TMEM35A;HSPA1A;HOPX;PFDN6;BBS12;BBS10;PSMG3;HSP90AB1;HSP90AA1;MKKS;CLU;NDUFAF1;PSMG1;LONP1;CCT2;HSPD1	Micro
713	KEGG_2021_Human__Alzheimer disease	-0.198811	-2.07746	0	0.0165391	0.933	176/306	44.47%	GRIN2C;CDK5;AXIN2;TNF;IL1B;PSENEN;WNT10B;NDUFA7;NDUFA4L2;GPR83;CDK5R1;KIF5C;TUBA4A;GRIN2B;GRIN1;IL1A;ATG101;TUBB2A;WNT5B;TUBB4A;PSMA8;COX7A1;HSD17B10;FRAT1;NDUFA4;KLC2;CSF1;IRS1;CHRM1;MAPT;UQCRHL;NDUFC2;DKK2;SLC25A4;PSMC3;APC2;NDUFB11;NDUFB10;KIF5A;COX8A;CALM3;NDUFV2;FZD4;COX5B;PLCB1;NDUFA13;CHRM3;GRIN2A;TPTEP2-CSNK1E;CALM1;UQCR11;COX6A1;HRAS;PLCB4;NDUFB3;PSMD8;CYCS;DVL2;ATP5MC3;NDUFAB1;DDIT3;ATP…	Micro
714	WikiPathway_2023_Human__T Cell Modulation In Pancreatic Cancer WP5078	0.353743	2.07564	0.00487805	0.0377071	0.92	20/32	28.48%	IL6;TNFSF4;VEGFA;CD80;IL10;TGFB2;ARG1;VEGFD;PVR;LGALS3;TGFB3;CD40;FAS;HLA-A;PDCD1LG2;LGALS9;B2M;VSIR;CD226;CD86	Micro
715	GO_Biological_Process_2023__Regulation Of Vascular Endothelial Growth Factor Signaling Pathway (GO:1900746)	0.442567	2.07342	0.00729927	0.0379045	0.922	9/17	14.22%	SMOC2;VEGFA;TNXB;DLL1;CADM4;DAB2IP;ROBO1;SORD;CCBE1	Micro
716	GO_Biological_Process_2023__Glial Cell Differentiation (GO:0010001)	-0.394629	-2.07323	0.00169492	0.0170133	0.94	14/28	14.23%	CDK5;GPC1;SOX8;BCAN;SLC8A3;NFIB;EGR2;TPPP;ERBB3;HAPLN1;ADGRG6;SOX10;NCAN;CDH2	Micro
717	KEGG_2021_Human__Influenza A	0.212996	2.06393	0	0.0398999	0.942	63/129	31.92%	SOCS3;FADD;IL6;PIK3R2;HLA-DQB1;MX2;PIK3R3;MX1;OAS3;IRF7;RSAD2;TRIM25;TRADD;OAS2;PYCARD;NXT1;HLA-DQA1;BAK1;MYD88;HLA-DOA;NFKBIB;HLA-DRB5;IKBKE;IKBKG;TNFRSF10A;CCND3;IFNAR2;ICAM1;KPNA2;HLA-DMA;NLRX1;BAX;AKT1;CASP1;FAS;NFKBIA;STAT1;CPSF4;TYK2;PML;EIF2AK2;IFIH1;STAT2;CASP9;IRF9;HLA-DPB1;TLR3;HLA-DMB;TNFSF10;HLA-DRB1;RAE1;HLA-DPA1;TRAF3;TNFRSF10B;CHUK;CIITA;DNAJC3;BCL2L2-PABPN1;CDK6;HNRNPUL1;NFKB1;CAL…	Micro
718	GO_Biological_Process_2023__Regulation Of Regulated Secretory Pathway (GO:1903305)	-0.389809	-2.05935	0.00679117	0.0188779	0.953	18/31	25.31%	SYT10;RIMS4;SYT5;DOC2B;SYT7;SYT13;RIMS3;SYN1;RAB3A;RPH3A;SYT3;RAB15;SYT4;SYT1;RIMS2;RIMS1;SYT9;RPH3AL	Micro
719	KEGG_2021_Human__ECM-receptor interaction	0.274268	2.05693	0.00265957	0.0414179	0.949	20/59	8.77%	COL4A2;SDC4;ITGA4;COL4A1;CD44;GP6;ITGA7;THBS1;ITGA2;TNXB;SPP1;THBS4;FREM2;ITGB4;LAMA2;LAMA4;ITGB3;AGRN;ITGA10;LAMA3	Micro
720	KEGG_2021_Human__Thermogenesis	-0.212834	-2.05658	0	0.0191287	0.956	107/199	39.48%	CREB3L1;PRDM16;MAPK12;CNR1;PRKG2;NDUFA7;NDUFA4L2;DPF1;COX16;NPPA;ACTL6B;PRKAG1;PRKAA2;COX14;CPT1C;ADCY1;COX7A1;BMP8A;NDUFA4;UQCRHL;DPF3;NDUFC2;MLST8;NDUFB11;NDUFB10;COX8A;COA3;MGLL;NDUFV2;COX5B;NDUFA13;COA6;UQCR11;COX6A1;HRAS;ATP5MF;NDUFB3;ATP5MC3;NDUFAB1;RPS6KB2;ATP5MC1;NDUFAF3;ACSL6;COX5A;ATP5PF;UQCRB;COX6B1;ATP5PO;LIPE;NDUFS8;CYC1;RPS6KA6;CREB3;UQCRFS1;COX7A2;NDUFA6;UQCRC1;ATP5F1D;SLC25A29;COX…	Micro
721	MSigDB_Hallmark_2020__Pancreas Beta Cells	-0.430206	-2.05529	0.00171527	0.0192733	0.957	11/23	12.55%	DPP4;SST;DCX;PCSK1;NEUROD1;PAK3;SYT13;PCSK2;CHGA;PAX6;ABCC8	Micro
722	WikiPathway_2023_Human__Regucalcin In Proximal Tubule Epithelial Kidney Cells WP4838	0.386426	2.05485	0.00243309	0.041637	0.95	22/25	48.22%	NOS1;RGN;BAK1;TGFBR1;ACTA2;BAX;AKT1;PDE1B;CASP9;CASP8;TNFRSF1A;MTOR;MCU;G3BP1;SMAD2;RAF1;BRAF;MAPK1;SMAD4;APAF1;MAP3K5;PIK3CA	Micro
723	KEGG_2021_Human__Cytokine-cytokine receptor interaction	0.217767	2.05276	0	0.0420821	0.953	50/116	24.46%	IL15;TNFRSF11B;IFNLR1;OSM;BMP6;CXCR4;IL1R1;CCR3;IL17B;IL27;TNFSF14;IL18R1;TNFRSF19;IL21R;IL6;IL4R;TNFSF4;IL17RB;IL10;TGFB2;TNFSF13B;BMP7;IL34;IL27RA;ACKR4;TGFB3;BMPR1B;IL20RB;OSMR;IL10RB;TNFRSF14;GDF11;ACVR1B;TGFBR1;TNFRSF10A;CD40;EDA2R;IFNAR2;TNFSF12;RELT;CXCL16;EBI3;IL15RA;FAS;CSF2RB;IL10RA;TNFRSF1B;TNFRSF10D;IL17RA;ACVR2B	Micro
724	GO_Biological_Process_2023__Positive Regulation Of Interleukin-17 Production (GO:0032740)	0.447573	2.05015	0.0022779	0.0424401	0.958	10/17	23.16%	IL15;NOD2;OSM;SLAMF6;IL6;SLC7A5;MYD88;ZBTB7B;PRKCQ;TYK2	Micro
725	WikiPathway_2023_Human__Splicing Factor NOVA Regulated Synaptic Proteins WP4148	-0.349614	-2.04802	0.00169492	0.0204184	0.964	17/41	17.60%	KCNJ6;CAV2;NTNG1;RAP1GAP;CADM3;GRIN2B;GRIN1;EPB41L1;KCNQ2;NCDN;GABBR2;CDH2;CHL1;MAPK4;ANK3;GABRG2;PLCB4	Micro
726	GO_Cellular_Component_2023__Condensed Chromosome (GO:0000793)	0.277574	2.04795	0	0.0427245	0.96	22/54	19.77%	NCAPH;PSMC3IP;EID3;SUV39H1;RRS1;CHEK1;CHMP1A;CHAMP1;CENPE;CENPA;RAD50;FANCD2;L3MBTL1;ESRRB;IHO1;SHOC1;HMGB2;SETMAR;NIFK;SYCP2L;RCC1;NCAPD2	Micro
727	GO_Biological_Process_2023__Mitochondrial Translation (GO:0032543)	-0.258927	-2.0477	0.00151286	0.0203449	0.965	67/96	47.68%	NDUFA7;MRPL54;MRPL9;MRPL12;MRPL40;MRPL28;MRPL55;GADD45GIP1;MRPL23;MRPL34;MRPS33;TUFM;TSFM;MRPL17;MRPL27;MRPL43;MRPS15;MRPL10;CHCHD1;MRPL51;MRPL36;MRPL24;MRPL11;MRPS28;MRPS12;MRPS7;MRPS6;MRPL4;MRPS34;MRPL41;MRPL44;MRPS18A;MRPL2;MRPL50;MRPL14;MRPL30;MRPL35;MRPL21;MRPS14;MRPS16;MRPL16;MRPL18;MRPL57;MRPL58;MRPL37;MRPS18C;MRPS10;MRPS30;MRPS23;MRPL52;MRPL33;MRPS22;MRPL47;MRPL20;MRPL48;MRPL13;MRPS11;GAT…	Micro
728	KEGG_2021_Human__JAK-STAT signaling pathway	0.230228	2.04534	0	0.0430043	0.961	39/97	24.98%	SOCS3;IL15;IFNLR1;OSM;PIM1;JAK3;CISH;IL21R;MYC;IL6;IL4R;GFAP;PIK3R2;IL10;STAT4;CDKN1A;PIK3R3;PDGFRB;IL27RA;IL20RB;OSMR;IL10RB;PDGFA;PTPN2;PTPN6;STAT5A;CCND3;CCND1;IFNAR2;MCL1;IL15RA;AKT1;STAT1;CSF2RB;IL10RA;TYK2;STAT2;IRF9;BCL2L1	Micro
729	GO_Biological_Process_2023__Sensory Perception Of Light Stimulus (GO:0050953)	0.278433	2.04209	0	0.0435573	0.963	23/54	20.14%	EFEMP1;RGS16;CNGB1;CACNA1F;E2F1;ADGRV1;EYA4;ROM1;POU6F2;CABP4;PRPH2;WHRN;RDH10;KIFC3;IMPG2;COL18A1;UNC119;GUCA1B;BEST1;EML2;CRYGS;MYO7A;OPA3	Micro
730	GO_Cellular_Component_2023__Mitochondrial Ribosome (GO:0005761)	-0.435048	-2.0409	0	0.0212578	0.971	18/22	40.14%	NDUFA7;MRPL9;MRPL40;MRPL28;MRPL34;MRPL43;MRPL51;MRPS12;MRPL14;MRPL35;MRPS14;MRPL18;MRPL57;MRPL37;MRPS22;MRPL20;MRPL48;MRPL13	Micro
731	WikiPathway_2023_Human__Canonical And Non Canonical Notch Signaling WP3845	-0.416761	-2.03806	0.00336134	0.0215234	0.972	12/23	21.55%	HEY1;LEF1;DLL3;NOTCH3;RRAS;DNER;JAG2;JAG1;CNTN6;HES1;PSEN2;NOTCH4	Micro
732	GO_Biological_Process_2023__Maturation Of 5.8S rRNA From Tricistronic rRNA Transcript (SSU-rRNA, 5.8S rRNA, LSU-rRNA) (GO:0000466)	0.407057	2.03801	0.00221729	0.0444431	0.966	15/20	33.81%	RRS1;FTSJ3;PES1;KRI1;URB1;EXOSC2;NOP14;EXOSC9;EXOSC8;NOL9;ERI1;ERI2;EXOSC10;UTP20;EXOSC7	Micro
733	MSigDB_Hallmark_2020__Xenobiotic Metabolism	0.203132	2.03087	0	0.0466376	0.974	76/150	32.23%	SLC22A1;CFB;EPHA2;IL1R1;SLC6A12;VNN1;PDK4;SERPINE1;HSD11B1;AQP9;ABCC3;AKR1C3;ESR1;HMOX1;TGFB2;PEMT;CYP2S1;LCAT;CYP2J2;ARG1;TMEM176B;PAPSS2;ATOH8;ARG2;MT2A;UPB1;ABCC2;HES6;CYP27A1;ITIH4;ID2;UGDH;SLC1A5;GCH1;ALAS1;FAH;AHCY;CASP6;GSTM4;SLC12A4;RETSAT;NFS1;PC;GSS;BLVRB;PPARD;ETS2;PROS1;DHRS1;ACP2;FAS;PGD;AP4B1;APOE;ENTPD5;PTGR1;MTHFD1;ELOVL5;DHRS7;UPP1;IDH1;ACOX3;ABHD6;IRF8;SLC35D1;ETFDH;GSR;GART;SLC…	Micro
734	WikiPathway_2023_Human__Toll Like Receptor Signaling Pathway WP75	0.243765	2.02845	0.00294118	0.0471706	0.977	61/78	50.60%	TLR2;MAP3K8;MAPK11;FADD;IL6;PIK3R2;CD80;SPP1;FOS;PIK3R3;MAPK13;IRF7;TLR8;MAP2K3;MYD88;NFKBIB;IKBKE;IRAK1;IKBKG;CD40;MAPK10;IFNAR2;CD14;AKT1;NFKBIA;STAT1;IRF5;TLR3;TLR5;TIRAP;MAP2K7;CD86;TRAF3;CHUK;NFKB1;CASP8;LY96;TAB3;RIPK1;IFNAR1;MAPK14;TLR1;PIK3CD;IRAK4;TLR6;PIK3CB;TBK1;MAP2K1;PIK3R1;MAPK1;MAP2K4;MAP3K7;TAB2;IKBKB;MAPK8;RAC1;MAPK9;PIK3CA;PIK3R5;AKT3;TRAF6	Micro
735	GO_Biological_Process_2023__Regulation Of Cytosolic Calcium Ion Concentration (GO:0051480)	-0.372055	-2.02639	0.00328947	0.0233692	0.979	18/33	24.75%	ATP2B3;CALB1;CAV1;FKBP1B;CALB2;TRPC5;TRPC6;CAV2;SLC8A2;TRPC3;TUNAR;TMEM178A;TRPC4;ATP2B2;SLC35G1;PLN;CALCB;RYR2	Micro
736	GO_Molecular_Function_2023__Neurotransmitter Receptor Activity Involved In Regulation Of Postsynaptic Membrane Potential (GO:0099529)	-0.446734	-2.02534	0.00341297	0.0234291	0.98	14/19	30.08%	GRIN2C;GRIN2B;GRIN3A;GRIK4;GABRA2;GRIA1;GRIK5;GRIN2A;GRIA2;GRIA3;GRID1;GRIA4;GRID2;CHRNE	Micro
737	GO_Biological_Process_2023__Neuron Projection Development (GO:0031175)	-0.222074	-2.02309	0	0.0237311	0.981	56/164	20.78%	BDNF;CDK5;NYAP1;UNC5A;NEFH;SHANK1;NPY;LGI1;PACSIN1;CDK5R1;GPRIN1;NEUROD1;OLIG2;SAMD14;CNTNAP1;BLOC1S1;L1CAM;PQBP1;SHANK3;PAK3;FLRT3;ATCAY;TUNAR;EPHA4;ZNF365;PPP1R9A;STMN2;CTTN;OLIG1;MAPT;RASGRF1;NEUROD2;NCDN;BHLHE22;UBB;BICDL1;RAB6B;NEUROD6;NYAP2;EPHB3;BLOC1S3;TBC1D24;NBL1;STMN4;SH3GL2;MAP1B;MICALL1;BLOC1S4;NMNAT2;DCLK1;GPM6A;CNTN4;LAMB1;PLP1;FRY;STMN1	Micro
738	GO_Biological_Process_2023__Negative Regulation Of Neuron Projection Development (GO:0010977)	-0.315871	-2.02072	0.00333333	0.0239804	0.982	24/49	25.35%	EFNB3;STX1B;BCL11A;FKBP4;MAG;TNR;RTN4R;DPYSL3;RTN4RL2;THY1;EPHA4;ZNF365;STMN2;CRMP1;TRPV4;EFNB2;NGEF;KANK1;PTPRS;CIB1;SPOCK1;ITM2C;KIAA0319;DCC	Micro
739	GO_Cellular_Component_2023__Mitochondrial Intermembrane Space (GO:0005758)	-0.3016	-2.01973	0	0.0240001	0.982	31/56	32.50%	DIABLO;BLOC1S1;PRELID1;STOML2;ARL2;TIMM10;GUCY2C;COA6;ALPL;TRIAP1;CHCHD4;CYCS;CHCHD2;TIMM8A;SOD1;HAX1;THOP1;TIMM8B;CHCHD10;NDUFB7;CHCHD5;TIMM13;PRELID3A;HTRA2;UQCC2;TIMM29;PINK1;NDUFA8;CPOX;REXO2;SIRT5	Micro
740	GO_Biological_Process_2023__Synaptic Vesicle Cycle (GO:0099504)	-0.37163	-2.01724	0.00338983	0.0242538	0.982	16/32	21.80%	SLC32A1;CDK5;SYT10;CPLX1;SLC17A6;STX1A;SYT7;SNAP25;RAB3A;BRSK1;CDH2;SLC17A7;VAMP2;AP3S2;CPLX2;RIMS1	Micro
741	GO_Biological_Process_2023__Positive Regulation Of Pattern Recognition Receptor Signaling Pathway (GO:0062208)	0.33041	2.01572	0.00255754	0.0503965	0.983	19/34	30.08%	TLR2;TREML4;OASL;IFI35;PTPN22;DHX58;RSAD2;MFHAS1;CD14;DDX60;EHHADH;TLR3;TLR5;TIRAP;TASL;CYBA;WDFY1;USP15;FLOT1	Micro
742	GO_Cellular_Component_2023__Collagen-Containing Extracellular Matrix (GO:0062023)	-0.203156	-2.00895	0	0.025686	0.988	99/226	27.18%	ADAMTS8;ECM1;MGP;COL16A1;PXDN;CTHRC1;LAMB3;COL6A1;LAMA1;VWA1;CBLN4;CDH13;GPC1;MMP28;FBLN5;ADAM11;ITIH5;ADAM19;ADAMTS1;ADAMTS3;CCN2;LGALS1;CCNA2;FBLN2;TNR;NPPA;COL9A3;FBN2;COCH;ANXA1;RARRES2;TNC;HRNR;EGFL7;F12;ACHE;MDK;PRELP;COL4A5;FREM1;SMOC1;COL4A4;L1CAM;THBS2;WNT5B;LAMA5;COL11A1;COL21A1;COL5A3;ELN;ANXA6;COL24A1;COL4A3;SERPINE2;HAPLN1;CTSF;FBLN1;MMRN1;PCSK6;FREM3;CDH2;ASPN;MMP2;ANGPTL2;COL12A1;S…	Micro
743	WikiPathway_2023_Human__NRF2 Pathway WP2884	0.227789	2.00703	0.00280899	0.0528782	0.986	37/95	19.83%	EPHA2;GPX3;SLC2A3;SLC2A6;SLC5A9;SLC2A12;ABCC3;SLC6A13;SERPINA1;HMOX1;TGFB2;HBEGF;SLC39A8;CES4A;FGF13;ABCC2;SLC5A6;SLC6A8;SLC5A11;GSTM3;G6PD;SLC7A11;SLC39A12;MAFF;SLC2A1;KEAP1;SLC6A16;SLC2A5;GSTM4;FTL;SLC2A9;SLC39A7;BLVRB;PPARD;GSTM2;FTH1;GCLM	Micro
744	GO_Biological_Process_2023__Adenylate Cyclase-Activating G Protein-Coupled Receptor Signaling Pathway (GO:0007189)	0.265848	2.00528	0	0.0531496	0.988	24/60	17.17%	ADGRE2;ADCY4;ADGRE1;ADRA2C;GPER1;PTGER3;ADGRD1;PTGIR;MC1R;ADGRG3;GPR65;GPR157;CALCRL;ADGRE5;ADCY3;ADCY8;PTGER4;ADCY2;ADCY6;ADCY5;GPR161;RAMP1;ADCY9;ADGRG5	Micro
745	GO_Biological_Process_2023__Regulation Of Viral Transcription (GO:0046782)	0.445471	1.9992	0.00235849	0.0550572	0.989	8/16	15.30%	IFITM3;MDFIC;TRIM21;ZFP36;TARBP2;TRIM32;TRIM14;TRIM11	Micro
746	GO_Biological_Process_2023__Regulation Of Dendrite Extension (GO:1903859)	-0.468538	-1.9979	0.00507614	0.0278093	0.993	10/17	21.80%	CPNE6;UNC13A;OSTN;SYT3;SYT4;CPNE9;SYT1;RIMS2;RASAL1;RIMS1	Micro
747	GO_Biological_Process_2023__snRNA Processing (GO:0016180)	0.431803	1.99321	0.00477327	0.056769	0.992	14/17	39.14%	INTS5;TOE1;USB1;INTS11;INTS14;INTS7;INTS13;INTS12;INTS2;INTS9;INTS10;INTS4;INTS6L;INTS8	Micro
748	GO_Cellular_Component_2023__Basement Membrane (GO:0005604)	0.303837	1.99226	0.00257069	0.0567253	0.992	17/39	15.74%	COL4A2;SMOC2;COL4A1;COL23A1;THBS4;HMCN1;LAMA2;LAMA4;AGRN;LAMA3;NID1;CD151;LAMC1;COLQ;LOXL2;EFEMP2;FBN1	Micro
749	GO_Biological_Process_2023__Response To Interferon-Beta (GO:0035456)	0.368771	1.99161	0.00980392	0.0565076	0.992	14/25	25.33%	AIM2;TRIM6;PLSCR1;IFITM2;IFITM3;IRGM;BST2;IKBKE;IFNAR2;IRF1;SHFL;STAT1;XAF1;PNPT1	Micro
750	GO_Biological_Process_2023__Regulation Of Phosphatidylinositol 3-Kinase Activity (GO:0043551)	0.340771	1.98957	0.00485437	0.0568441	0.992	11/29	11.18%	FGR;NOD2;FLT3;FGFR3;PIK3R2;PRKD1;PIK3R3;PDGFRB;DAB2IP;WASHC1;PIK3IP1	Micro
751	GO_Biological_Process_2023__Negative Regulation Of Epithelial Cell Proliferation (GO:0050680)	0.27647	1.98863	0	0.0567401	0.993	24/53	23.37%	NUPR1;CEACAM1;THBS1;RUNX3;TGFBR3;SULF1;TGFB2;SOX2;NLRC3;SOX9;ATOH8;AQP11;DAB2IP;CDKN2B;ROBO1;SORD;DUSP10;GHRL;TINF2;PTPRK;STAT1;BRCA2;B2M;APOE	Micro
752	GO_Biological_Process_2023__Regulation Of Nervous System Process (GO:0031644)	-0.466162	-1.98447	0	0.0305639	0.995	12/17	28.75%	NPTX2;BEGAIN;HTR2C;CACNG5;SLC8A2;SLC8A3;NPTXR;DLGAP3;NPTX1;DLGAP1;TMEM108;CHRNA7	Micro
753	KEGG_2021_Human__Cocaine addiction	-0.334539	-1.98419	0.00160772	0.0304679	0.995	19/40	23.57%	CREB3L1;GRIN2C;BDNF;CDK5;FOSB;GRM2;CDK5R1;GRIN2B;GRIN1;GRIN3A;MAOB;DRD1;SLC18A1;RGS9;GRIN2A;GRM3;GRIA2;CREB3;MAOA	Micro
754	GO_Cellular_Component_2023__Organelle Envelope Lumen (GO:0031970)	-0.288373	-1.98297	0	0.0305491	0.995	33/62	32.50%	PLAAT1;DIABLO;BLOC1S1;PRELID1;TUBB2A;STOML2;ARL2;TIMM10;GUCY2C;COA6;ALPL;TRIAP1;CHCHD4;CYCS;CHCHD2;TIMM8A;SOD1;HAX1;THOP1;TIMM8B;CHCHD10;NDUFB7;CHCHD5;TIMM13;PRELID3A;HTRA2;UQCC2;TIMM29;PINK1;NDUFA8;CPOX;REXO2;SIRT5	Micro
755	WikiPathway_2023_Human__Nonalcoholic Fatty Liver Disease WP4396	-0.231668	-1.98175	0	0.0306251	0.995	78/135	41.19%	CCL2;TNF;IL1B;NDUFA7;NDUFA4L2;PRKAG1;PRKAA2;IL1A;COX7A1;NDUFA4;IRS1;CYP2E1;UQCRHL;NDUFC2;NDUFB11;NDUFB10;COX8A;NDUFV2;COX5B;NDUFA13;UQCR11;COX6A1;NDUFB3;CYCS;GSK3A;NDUFAB1;DDIT3;COX5A;UQCRB;COX6B1;CEBPA;NDUFS8;CYC1;UQCRFS1;COX7A2;NDUFA6;UQCRC1;COX4I1;NDUFA11;NDUFB7;UQCR10;NDUFB5;UQCRQ;NDUFB8;BCL2L11;COX7C;NDUFB2;SDHD;NDUFS3;JUN;NDUFA2;UQCRH;NDUFA8;NDUFA3;NDUFA12;NDUFA9;COX6C;NDUFB4;NDUFS5;NR1H3;C…	Micro
756	GO_Biological_Process_2023__Cellular Response To Virus (GO:0098586)	0.320195	1.98117	0.00247525	0.0593725	0.993	18/36	27.07%	IFNLR1;MAPK11;IL6;VWCE;HIF1A;IRGM;IFI6;IL10RB;POU2F2;EIF5A;IFNAR2;BAX;LGALS9;TYK2;IFIH1;IRF5;RRP1B;GSDME	Micro
757	GO_Biological_Process_2023__Fibroblast Growth Factor Receptor Signaling Pathway (GO:0008543)	-0.395441	-1.97985	0	0.0308912	0.996	12/25	17.98%	FGF17;FGF5;FGF9;FGF2;GALNT3;FLRT3;FLRT1;FIBP;FLRT2;FGF7;FGF1;FRS3	Micro
758	GO_Biological_Process_2023__DNA Methylation (GO:0006306)	0.426907	1.97977	0.00904977	0.0594913	0.994	17/17	57.36%	DNMT3B;BEND3;FOS;N6AMT1;HELLS;EHMT2;PICK1;METTL4;GATAD2A;BAZ2A;EHMT1;ATRX;KMT2E;PPM1D;MTRR;DNMT3A;ZDBF2	Micro
759	WikiPathway_2023_Human__Toll Like Receptor Signaling Related To MyD88 WP3858	0.351568	1.97684	0.00253807	0.0600939	0.996	20/28	39.55%	TLR2;IRF7;TLR8;NFKB2;MYD88;IKBKE;IRAK1;IKBKG;RELB;TLR3;TLR5;REL;TIRAP;TRAF3;CHUK;NFKB1;TLR1;IRAK4;TLR6;TBK1	Micro
760	GO_Biological_Process_2023__Defense Response To Gram-negative Bacterium (GO:0050829)	0.349408	1.97658	0.00236407	0.059763	0.996	16/28	25.60%	SLC11A1;RNASE2;TREM1;SERPINE1;H2BC12;IL6;H2BC11;IRGM;PYCARD;TNFRSF14;MR1;GSDMD;HMGB2;EHHADH;TREM2;RPS19	Micro
761	KEGG_2021_Human__Mineral absorption	0.294462	1.97622	0.00271003	0.0594369	0.996	20/42	20.79%	VDR;MT1F;MT1M;TRPM6;MT1G;HEPH;HMOX1;MT1X;MT2A;ATP1A2;SLC26A3;ATP1B2;SLC31A1;SLC11A2;MT1E;FTL;ATP7B;ATP2B4;FTH1;CYBRD1	Micro
762	GO_Biological_Process_2023__Regulation Of Interleukin-12 Production (GO:0032655)	0.319727	1.97256	0.00492611	0.0603279	0.996	24/35	37.90%	TLR2;JAK3;MAPK11;TNFSF4;THBS1;IL10;TLR8;SCIMP;CD40;HLA-B;LILRB1;LGALS9;FOXP1;IRF5;TLR3;TIRAP;CMKLR1;RIPK2;CLEC7A;CD47;IRAK3;MAPK14;LAPTM5;MAST2	Micro
763	WikiPathway_2023_Human__PI3K AKT mTOR Vitamin D3 Signaling WP4141	0.397837	1.97174	0.00985222	0.0601854	0.996	12/20	28.48%	VDR;HK3;SLC2A3;MYC;CD80;IL10;LDHA;PFKFB4;AKT1;TSC2;RXRA;CD86	Micro
764	WikiPathway_2023_Human__mBDNF And proBDNF Regulation Of GABA Neurotransmission WP4829	-0.350551	-1.97104	0	0.0327881	0.997	14/34	17.93%	GABRA6;BDNF;GABRD;GABRA4;GABRA5;SLC12A5;GABRG3;GABRG1;GABRB1;GABRA1;GABRA3;GABRA2;GABRG2;GABRB2	Micro
765	WikiPathway_2023_Human__Hepatitis B Infection WP4666	0.203955	1.96772	0	0.0616328	0.997	105/128	56.81%	TLR2;JAK3;MAPK11;FADD;MYC;IL6;PIK3R2;STAT4;CDKN1A;TGFB2;FOS;PIK3R3;MAPK13;IRF7;TGFB3;MAP2K3;MYD88;CREB5;IKBKE;IRAK1;PCNA;TGFBR1;IKBKG;ATP6AP1;STAT5A;MAPK10;ARAF;RIGI;BAX;AKT1;FAS;STAT1;TYK2;ATF6B;ATF4;IFIH1;STAT2;CASP9;TLR3;DDB2;TIRAP;MAP2K7;STAT3;PTK2B;STAT6;TRAF3;NFATC1;CHUK;NFKB1;CASP8;BCL2;NFATC2;MAVS;DDB1;IFNAR1;GRB2;STAT5B;MAPK14;CREB3L2;PIK3CD;IRAK4;PIK3CB;TBK1;MAP2K1;JAK2;TGFBR2;SMAD2;PIK…	Micro
766	GO_Biological_Process_2023__Positive Regulation Of Cell Communication (GO:0010647)	-0.416711	-1.9672	0.0048	0.033497	0.997	13/23	21.80%	NMU;TNF;RIMS4;CARTPT;LGI1;RIMS3;WLS;CLSTN2;ANK3;SYT1;CLSTN3;RIMS2;RIMS1	Micro
767	KEGG_2021_Human__Progesterone-mediated oocyte maturation	0.230949	1.96644	0	0.0618252	0.997	28/82	18.76%	ADCY4;MAPK11;CCNA1;PIK3R2;CPEB4;PIK3R3;ADCY3;ANAPC2;MAPK13;SPDYE3;ADCY8;SPDYE18;CDK2;KIF22;AURKA;ADCY2;SPDYE1;ADCY6;SPDYE16;SPDYA;ADCY5;CCNB3;PDE3B;RPS6KA2;ADCY9;MAPK10;CDC25B;ARAF	Micro
768	GO_Biological_Process_2023__Phospholipase C-activating G Protein-Coupled Receptor Signaling Pathway (GO:0007200)	0.270394	1.96269	0	0.0627603	0.997	18/53	10.42%	PTGER3;TGM2;GNA14;OPRK1;FPR3;ANO1;GPR18;FPR2;GPR35;GPR65;GPR157;ESR1;P2RY11;LTB4R;PLCE1;TACR1;FPR1;AGT	Micro
769	GO_Biological_Process_2023__Chemical Synaptic Transmission, Postsynaptic (GO:0099565)	-0.45175	-1.96055	0.00483092	0.0349579	0.999	9/17	20.71%	GRIN2C;INSYN1;CHRNA4;MAPK8IP2;GRIN2B;GRIN1;GRIN2A;GSK3A;NLGN3	Micro
770	WikiPathway_2023_Human__Nuclear Receptors Meta Pathway WP2882	0.173841	1.95783	0	0.0638854	0.997	71/219	20.03%	VDR;FKBP5;THBD;ANGPTL4;EPHA2;GADD45B;IL17B;GPX3;SLC2A3;PDK4;MYC;SLC2A6;SLC5A9;PLTP;SLC2A12;ABCC3;SLC6A13;TGFBR3;SLC7A5;ESR1;RGS2;CPEB4;SERPINA1;HMOX1;PPARGC1A;TGFB2;HBEGF;CYP1B1;CDC42EP3;SLC39A8;PTGS2;CES4A;TSC22D3;MFGE8;CPT1A;PMP2;FGF13;TNFAIP3;ABCC2;BHLHE40;SLC5A6;SLC6A8;SLC5A11;GSTM3;NFKB2;G6PD;ABCB1;SLC7A11;SLC39A12;SRGN;MAFF;SLC2A1;SULT1A1;KEAP1;ALAS1;SLC6A16;SLC2A5;LRRC8A;GSTM4;FTL;SLC2A9;C…	Micro
771	GO_Biological_Process_2023__Cell-Cell Junction Organization (GO:0045216)	-0.310607	-1.9562	0.00481541	0.0358215	0.999	28/48	34.37%	CLDN1;CDH13;F2R;PKP2;ARVCF;CDH7;GJC1;CDH22;OCLN;TRPV4;CDH2;CDH4;MYADM;F2RL1;CDH9;CDH3;CDH11;PARD6A;NLGN4X;CDH12;PARD6B;CTNND2;CDHR3;CDH8;CDH6;CDH10;CDH18;FSCN1	Micro
772	GO_Biological_Process_2023__Positive Regulation Of Angiogenesis (GO:0045766)	0.224297	1.95488	0	0.0648341	0.997	24/88	10.85%	ANGPTL4;CCR3;CHI3L1;SMOC2;SERPINE1;VASH2;EMILIN2;VEGFA;THBS1;RAPGEF3;PRKD1;HMOX1;ZNF304;EMP2;KLF4;DLL1;CYP1B1;HIF1A;VEGFD;WNT5A;HYAL1;S100A1;FUT1;SIRT6	Micro
773	GO_Cellular_Component_2023__Specific Granule (GO:0042581)	0.206113	1.95448	0.0030303	0.064558	0.997	45/121	23.83%	BST1;GPR84;CLEC5A;CHI3L1;CD93;ADAM8;CHIT1;SLC2A3;CEACAM1;FPR2;FCAR;ADGRG3;P2RX1;ARG1;ALDH3B1;DNASE1L1;HPSE;STXBP2;PLAUR;CTSD;ITGAV;OSCAR;ATP11A;AGPAT2;VAMP8;PTPN6;GSDMD;GHDC;SLC2A5;STX3;ITGAL;RAP2B;TMBIM1;NIT2;CRACR2A;TOM1;STOM;TSPAN14;KCNAB2;DNAJC5;TNFRSF1B;B2M;CYBB;RAB27A;SLC44A2	Micro
774	GO_Biological_Process_2023__Response To Lipid (GO:0033993)	0.233797	1.95416	0.00286533	0.0642855	0.997	35/79	27.27%	SLC11A1;S100A8;S100A9;TRIM6;NOS1;GPX3;ILDR1;ESR1;PTPN22;SPP1;MICB;SOX9;CPS1;PPARG;NOCT;GCH1;IRAK1;ALAS1;ACER2;ALDH1A2;HMGB2;SRR;RXRB;LIAS;LGALS9;FOXP1;TRIB1;EHHADH;ABCG1;TREM2;TRIM16;RXRA;TIRAP;MAPKAPK3;STAT3	Micro
775	KEGG_2021_Human__Hematopoietic cell lineage	0.267877	1.9533	0.004914	0.0641707	0.997	18/51	13.44%	CD1D;IL1R1;ITGA4;IL6;CD44;IL4R;FLT3;ITGA2;CR1;HLA-DQB1;CR1L;FCGR1A;ITGB3;CD24;TFRC;HLA-DQA1;HLA-DOA;HLA-DRB5	Micro
776	KEGG_2021_Human__Tuberculosis	0.195513	1.95127	0.00613497	0.0642497	0.997	113/141	56.81%	VDR;TLR2;NOD2;FCGR2B;MAPK11;FCGR3A;FCGR2A;FADD;LSP1;IL6;CR1;HLA-DQB1;IL10;PLA2R1;CR1L;TGFB2;FCGR1A;FCGR2C;MAPK13;TRADD;PLK3;TGFB3;RFX5;IL10RB;CEBPB;HLA-DQA1;MYD88;CTSD;HLA-DOA;HLA-DRB5;SPHK2;RAB5C;IRAK1;ATP6AP1;FCER1G;MAPK10;TCIRG1;HLA-DMA;CD14;BAX;AKT1;STAT1;IL10RA;CASP9;HLA-DPB1;CEBPG;TIRAP;HLA-DMB;HLA-DRB1;HLA-DPA1;CIITA;RIPK2;CD74;NFKB1;ITGB2;CASP8;CLEC7A;ATP6V0A2;BCL2;TNFRSF1A;MAPK14;TLR1;IR…	Micro
777	GO_Biological_Process_2023__Regulation Of Interleukin-17 Production (GO:0032660)	0.370038	1.95114	0.00230947	0.0639152	0.997	7/23	4.65%	IL15;NOD2;OSM;SLAMF6;IL6;TNFSF4;SLC7A5	Micro
778	KEGG_2021_Human__NOD-like receptor signaling pathway	0.198512	1.95023	0	0.0639028	0.997	79/138	39.84%	NOD2;GBP2;ANTXR2;CASR;AIM2;MAPK11;PSTPIP1;ITPR3;FADD;IL6;CASP5;GBP1;GBP4;OAS3;GBP5;MAPK13;IRF7;RIPK3;OAS2;TNFAIP3;PYCARD;CARD16;TRIP6;NAMPT;MYD88;NFKBIB;RNF31;IKBKE;GBP3;GSDMD;IKBKG;MAPK10;IFNAR2;NLRC4;NLRX1;TXNIP;TRPV2;CASP1;CASP4;CTSB;NFKBIA;STAT1;TYK2;CYBB;STAT2;IRF9;BCL2L1;CARD6;DHX33;ATG16L1;CYBA;TRAF3;NAIP;CHUK;PKN1;RIPK2;NFKB1;CASP8;TRPM2;PRKCD;TAB3;PLCB2;BCL2;MAVS;RIPK1;IFNAR1;TANK;MAPK14…	Micro
779	WikiPathway_2023_Human__17Q12 Copy Number Variation Syndrome WP5287	-0.280666	-1.94999	0.00626959	0.037225	0.999	16/62	6.41%	CCL4L2;STAC2;CCL3;GPR179;EPOP;RASL10B;CCL2;CCL8;SRCIN1;MMP28;NLE1;CCL4;PLXDC1;PCGF2;TMEM132E;ARL5C	Micro
780	GO_Cellular_Component_2023__MHC Protein Complex (GO:0042611)	0.422451	1.94916	0	0.0639345	0.997	14/18	30.94%	HLA-DQA1;HFE;HLA-DOA;HLA-DRB5;HLA-F;HLA-B;HLA-C;HLA-DMA;HLA-A;HLA-DMB;HLA-DRB1;HLA-DPA1;HLA-E;CD74	Micro
781	GO_Biological_Process_2023__Negative Regulation Of Microtubule Polymerization Or Depolymerization (GO:0031111)	-0.369173	-1.94566	0.00511073	0.0382068	0.999	13/29	22.26%	SPEF1;FKBP4;TPX2;CLIP3;TUBB4A;KATNB1;STMN2;APC2;CKAP2;BMERB1;STMN1;CIB1;MAP2	Micro
782	GO_Biological_Process_2023__Central Nervous System Development (GO:0007417)	-0.197551	-1.94419	0	0.0384344	0.999	96/229	30.09%	AMIGO2;GRIN2C;CDK5;CDK5R2;PCDH18;AMIGO1;DCX;EMX1;SLC6A17;SHROOM4;SOX8;EMX2;CDK5R1;MAL;ADGRA2;CA10;PBX4;NNAT;SLC8A3;CX3CR1;IL1RAPL2;FOXG1;GRIN2B;GRIN1;CHST8;NFIB;MEIS2;NPAS2;EGR2;CELSR1;TPPP;PAFAH1B3;NPAS1;NDRG4;DNER;TMX2;PAX6;PBX1;ARNT2;SOX10;HPCAL4;NPTX1;ROGDI;SMO;CDH2;TBR1;SHROOM2;GRIN2A;SOX12;ADAM22;HSPG2;PITPNM1;SH3GL2;TAGLN3;ROBO2;DCLK1;CNTN6;CNTN4;SH3GL3;EIF2B2;MAST1;ADAM23;LSR;SOX4;RELN;BR…	Micro
783	GO_Biological_Process_2023__Digestive Tract Development (GO:0048565)	-0.393758	-1.94315	0.00524476	0.0385499	0.999	17/24	35.47%	TNF;GLI3;NPY;RARRES2;RARB;SMO;EPHB3;CCDC39;KIT;GLI2;COBL;FGFR2;PKDCC;BBS7;MEGF8;PKD1;SALL1	Micro
784	KEGG_2021_Human__Amphetamine addiction	-0.291972	-1.94143	0.00319489	0.038842	0.999	25/56	24.81%	CREB3L1;GRIN2C;FOSB;CAMK2A;GRIN2B;GRIN1;STX1A;GRIN3A;CAMK4;CAMK2B;MAOB;DRD1;PRKCG;SLC18A1;CALM3;GRIA1;GRIN2A;CALM1;PPP1CA;GRIA2;GRIA3;CREB3;CALM2;MAOA;GRIA4	Micro
785	GO_Molecular_Function_2023__Carboxypeptidase Activity (GO:0004180)	0.358997	1.94108	0.00702576	0.066651	0.997	12/24	21.21%	CPM;AGBL1;VASH2;AEBP1;MATCAP1;CPXM2;CPVL;SCPEP1;NAALAD2;CTSA;AGBL3;MINDY1	Micro
786	WikiPathway_2023_Human__IL1 And Megakaryocytes In Obesity WP2865	0.393295	1.93893	0.00238095	0.0672021	0.998	10/20	18.50%	TLR2;S100A9;IL1R1;CCR3;PLA2G7;TIMP1;HBEGF;MYD88;IRAK1;ICAM1	Micro
787	KEGG_2021_Human__Circadian entrainment	-0.250608	-1.93722	0.0015748	0.039734	0.999	37/84	25.79%	CACNA1G;GRIN2C;GNGT1;PRKG2;GUCY1A1;KCNJ6;KCNJ9;GNG11;ADCYAP1;GNG3;CAMK2A;RASD1;GRIN2B;GRIN1;GUCY1A2;GNG4;CAMK2B;ADCY1;GNB5;KCNJ3;PRKCG;GNAO1;GUCY1B1;CALM3;GRIA1;PLCB1;GRIN2A;CALM1;PLCB4;NOS1AP;GRIA2;PER3;GRIA3;CALM2;RYR2;GRIA4;PLCB3	Micro
788	KEGG_2021_Human__Insulin resistance	0.218583	1.93681	0.00299401	0.0677635	0.998	53/92	38.20%	SOCS3;PPP1R3C;IL6;PYGL;GFPT2;PIK3R2;PPARGC1A;PIK3R3;PPP1R3B;SLC27A3;CPT1A;AGT;SLC27A6;CREB5;INSR;SLC2A1;PRKAB1;PCK2;PTPN1;MLXIPL;RPS6KA2;GYS1;MAPK10;ACACB;SLC27A4;MLX;PRKCE;CRTC2;PRKCQ;AKT1;NR1H2;NFKBIA;IRS2;STAT3;PRKAB2;PPARGC1B;PYGB;SLC27A1;PPARA;PRKAG2;PDPK1;NFKB1;RPS6KA3;PRKCD;PTPN11;TNFRSF1A;RPS6KA1;MLXIP;MTOR;GFPT1;CREB3L2;PIK3CD;RPS6KB1	Micro
789	GO_Biological_Process_2023__Monoatomic Anion Transmembrane Transport (GO:0098656)	-0.312696	-1.9334	0	0.0406847	0.999	19/44	17.93%	GABRA6;GABRA4;GABRA5;SLC12A1;GLRA3;ANO5;SLC12A5;GLRA2;GABRG3;GABRG1;GLRB;GABRB1;GABRA1;GABRA3;GABRA2;GABRG2;ANO4;ANO3;GABRB2	Micro
790	GO_Biological_Process_2023__Regulation Of Microtubule Depolymerization (GO:0031114)	-0.398233	-1.93153	0.00687285	0.0410286	0.999	11/23	21.86%	SPEF1;TPX2;KATNB1;STMN2;APC2;TRPV4;MAP1A;CKAP2;MAP1B;BMERB1;CIB1	Micro
791	GO_Biological_Process_2023__Modified Amino Acid Transport (GO:0072337)	0.381027	1.93021	0.00254453	0.0703371	0.999	10/22	12.95%	SLC47A1;SLC7A9;SLC6A13;PDPN;SLC7A2;SLC25A15;SLC7A1;SLC5A6;SLC6A8;SLC7A11	Micro
792	WikiPathway_2023_Human__IL 24 Signaling Pathway WP5413	0.179973	1.92963	0	0.0701325	0.999	87/189	31.49%	CXCR4;BCL6;BBC3;FADD;MYC;IL6;CD44;VEGFA;CD80;CDH1;CDKN1A;ITGB4;SOX2;MICB;VEGFD;NDRG1;TRADD;CDK2;CHEK1;CDKN2B;CD82;MST1;ABCB1;BAK1;PSMD9;EIF5A;MICA;KEAP1;MMP14;PCNA;CENPA;IKBKG;SPRYD4;TNFRSF10A;PRKG1;CD40;EIF4EBP1;CASP7;MAPK10;EIF4G1;CCND1;HLA-C;MCL1;ICAM1;CDK5RAP3;GSS;IRF1;CD14;BAX;AKT1;CASP4;FAS;CTSB;NFKBIA;MVD;ERN1;STAT1;XBP1;BRCA2;TNFRSF1B;CDKN2A;EIF2AK2;ATF4;CASP9;TLR3;BCL2L1;TXNRD2;CASP2;EIF…	Micro
793	WikiPathway_2023_Human__Iron Metabolism Disorders WP5172	0.422513	1.92935	0.00455581	0.0698037	0.999	10/16	20.79%	HAMP;HEPH;BCS1L;TFRC;HFE;SLC11A2;FTL;FTH1;STEAP3;CYBRD1	Micro
794	GO_Biological_Process_2023__Positive Regulation Of Pathway-Restricted SMAD Protein Phosphorylation (GO:0010862)	0.378724	1.92866	0.00954654	0.0696048	0.999	10/23	15.43%	BMP6;TNXB;TGFB2;BMP7;RBPMS;TGFB3;PPARG;GDF11;HFE;TGFBR1	Micro
795	KEGG_2021_Human__Toll-like receptor signaling pathway	0.232061	1.92795	0.00292398	0.0695503	0.999	47/77	39.95%	TLR2;MAP3K8;MAPK11;FADD;IL6;PIK3R2;CD80;SPP1;FOS;PIK3R3;MAPK13;IRF7;TLR8;MAP2K3;MYD88;IKBKE;IRAK1;IKBKG;CD40;MAPK10;IFNAR2;CD14;CTSK;AKT1;NFKBIA;STAT1;IRF5;TLR3;TLR5;TIRAP;MAP2K7;CD86;TRAF3;CHUK;NFKB1;CASP8;LY96;RIPK1;IFNAR1;MAPK14;TLR1;PIK3CD;IRAK4;TLR6;PIK3CB;TBK1;MAP2K1	Micro
796	GO_Molecular_Function_2023__Monoatomic Ion Gated Channel Activity (GO:0022839)	-0.374097	-1.92658	0.00818331	0.0423228	0.999	11/27	12.47%	CHRNB2;CHRNA4;TMC4;TRPM5;PIEZO2;KCNT1;KCNA3;GRIN1;TMC2;ANXA6;GABRB1	Micro
797	GO_Biological_Process_2023__Regulation Of Secretion By Cell (GO:1903530)	-0.297542	-1.92576	0.00502513	0.0423673	0.999	22/53	21.80%	HTR1A;MCTP2;RAB3B;CPLX1;RAB26;FER1L5;LGI3;SCG5;CAMK2A;SNCAIP;DYSF;SYN1;RAB3A;LLGL1;SEPTIN4;SEPTIN1;RAB3C;SYT1;VAMP2;CPLX2;RIMS2;RIMS1	Micro
798	GO_Biological_Process_2023__Monoatomic Cation Transmembrane Transport (GO:0098655)	-0.197449	-1.92507	0.00143062	0.0423173	0.999	67/204	19.54%	CACNA1G;KCNS2;GRIN2C;SLC30A3;KCNA4;ASIC1;SCN2B;KCNK3;KCNK2;TRPM5;SLC39A1;SLC6A9;SLC6A17;SLC39A4;SLC40A1;KCNG1;KCNK12;HCN2;KCNV1;SLC6A11;SLC30A10;TRPC5;SLC29A4;TRPC6;KCNS3;CNGA1;KCNB1;KCNA3;SLC6A7;KCNA7;SLC8A2;KCNH3;ATP1A3;SLC8A3;KCNK1;SCN3B;SLC12A1;ABCC9;GRIN2B;GRIN1;TRPC3;SCNN1A;KCNF1;KCNA2;SLC39A3;KCNQ2;ATP6V1F;KCNH1;ABCC8;KCNH5;TRPC4;SCN2A;TRPV4;KCNG3;HCN1;KCNB2;KCNN1;CCDC51;GRIN2A;SLC46A1;SLC…	Micro
799	GO_Biological_Process_2023__Toll-Like Receptor Signaling Pathway (GO:0002224)	0.339039	1.92415	0.00779221	0.0704258	0.999	26/28	57.39%	TLR2;TLR8;SCIMP;IRAK1;TLR3;TLR5;TIRAP;MAPKAPK3;TLR10;TRAF3;RPS6KA3;LY96;IRAK3;TLR1;IRAK4;TLR6;CTSS;MAP3K7;TRAF6;BTK;TLR7;MAPKAPK2;TNIP1;HSPD1;PLCG2;TICAM1	Micro
800	MSigDB_Hallmark_2020__Estrogen Response Late	0.187648	1.9215	0.00308642	0.0709857	0.999	43/148	14.84%	ST14;FKBP5;S100A9;GPER1;PTGER3;SULT2B1;ST6GALNAC2;CISH;CCNA1;CD44;IGSF1;FGFR3;ISG20;IL17RB;SLC7A5;BATF;CDH1;SERPINA1;EMP2;KLF4;SLC24A3;XRCC3;FOS;PLAC1;MICB;ALDH3B1;MAPK13;PAPSS2;PDLIM3;ZFP36;DHCR7;HSPB8;GALE;NXT1;PPIF;FLNB;SORD;ID2;RAPGEFL1;UGDH;PLXNB1;NAB2;PTPN6	Micro
801	GO_Biological_Process_2023__Regulation Of Synapse Assembly (GO:0051963)	-0.318361	-1.92123	0.00490196	0.0430912	0.999	25/44	32.45%	BDNF;CHRNB2;LRRC4B;SLITRK1;IL1RAPL2;LHFPL4;LRFN4;CUX2;SLITRK2;LRRTM3;CLSTN2;SLITRK4;LRFN5;EPHB3;SLITRK3;CLSTN3;ROBO2;NLGN3;NRXN1;MUSK;SLITRK5;DLG5;GRID2;SLIT1;PTPRD	Micro
802	GO_Biological_Process_2023__Negative Regulation Of T Cell Proliferation (GO:0042130)	0.339429	1.91925	0.0074813	0.0714897	0.999	14/27	22.12%	SDC4;GPNMB;VSIG4;CR1;IL4I1;CD80;IL10;TNFRSF14;CEBPB;BTN2A2;SPN;LILRB1;PDCD1LG2;LGALS9	Micro
803	WikiPathway_2023_Human__Peptide GPCRs WP24	0.330787	1.9191	0	0.0711563	0.999	13/29	13.97%	CXCR4;CCR3;OPRK1;FPR3;TAC4;FPR2;MC1R;ACKR1;EDNRB;TACR1;FPR1;OPRL1;C5AR1	Micro
804	GO_Biological_Process_2023__Ephrin Receptor Signaling Pathway (GO:0048013)	-0.32069	-1.91902	0.00493421	0.0434472	0.999	20/38	26.21%	EFNB3;EFNA4;EFNA3;CDK5R1;EPHA10;PAK3;EPHA4;CHN1;EPHA5;EFNB2;MMP2;EPHB3;NGEF;EPHA3;KALRN;EFNA5;EPHB6;ANKS1B;EPHA7;FYN	Micro
805	GO_Biological_Process_2023__Positive Regulation Of T Cell Mediated Immunity (GO:0002711)	0.337238	1.91641	0.00769231	0.0718884	0.999	13/28	21.54%	CD1D;FZD5;FADD;TNFSF4;MICB;HFE;MICA;HLA-F;ZP3;HLA-B;HLA-C;CD55;HLA-A	Micro
806	GO_Biological_Process_2023__Positive Regulation Of Tumor Necrosis Factor Production (GO:0032760)	0.25072	1.91627	0.00255102	0.0715163	0.999	37/61	37.52%	TLR2;NOD2;FCGR3A;FZD5;FADD;IL6;THBS1;OAS3;WNT5A;OAS2;PYCARD;SPHK2;FRMD8;CD14;SPN;RIGI;SETD4;LGALS9;EHHADH;IFIH1;TLR3;TIRAP;LCP1;STAT3;CYBA;HLA-E;EPHB2;LY96;CLEC7A;MAVS;TMEM106A;RIPK1;PTPN11;PSEN1;HAVCR2;TLR1;ARHGEF2	Micro
807	GO_Biological_Process_2023__Cellular Response To Fibroblast Growth Factor Stimulus (GO:0044344)	-0.340671	-1.91619	0.00335008	0.0442371	0.999	15/35	17.98%	FGF17;FGF5;FGF9;HYAL2;EGR3;NR4A1;FGF2;GALNT3;FLRT3;FLRT1;FIBP;FLRT2;FGF7;FGF1;FRS3	Micro
808	GO_Biological_Process_2023__Neuron Migration (GO:0001764)	-0.301959	-1.91568	0.00670017	0.0441752	0.999	22/49	25.35%	CDK5;DCX;SEMA3E;CCK;CDK5R1;POMGNT2;TRIM46;CELSR1;NELL1;DNER;ASTN1;SEPTIN4;MARK1;DCDC2;MAP1B;GPM6A;RELN;TUBB2B;SPOCK1;NR4A2;KIAA0319;DCC	Micro
809	GO_Cellular_Component_2023__Mitochondrial Membrane (GO:0031966)	-0.165584	-1.91445	0	0.0442924	1	268/487	43.84%	NDUFA7;SHMT2;COX16;GCAT;ACAD11;SLC25A22;NAT8L;BOK;MRPL54;CKMT1A;MTX1;MRPL9;SLC25A1;SLC8A3;PDE2A;SLC25A18;TMEM160;MRPL12;SLC9B2;MAOB;GPAT2;MRPL40;ATCAY;MRPL28;STOML2;PLD6;NDUFA4;MRPL55;CYP2E1;AURKAIP1;NDUFC2;SLC18A1;UBB;SLC25A4;GADD45GIP1;NDUFB11;NDUFB10;MRPL23;COX8A;SEPTIN4;COA3;TOMM22;MICOS13;MRPL34;NDUFV2;MRPS33;TUFM;NGRN;COX5B;MRPL17;TIMM50;NDUFA13;TIMM10;MOAP1;CCDC51;SMDT1;UBA52;HIGD1A;MRPL27…	Micro
810	GO_Biological_Process_2023__Vesicle-Mediated Transport In Synapse (GO:0099003)	-0.467608	-1.91302	0.0034662	0.0445749	1	10/16	21.80%	CDK5;SYT10;CPLX1;STX1A;SNAP25;RAB3A;BRSK1;VAMP2;CPLX2;RIMS1	Micro
811	GO_Biological_Process_2023__Regulation Of Tumor Necrosis Factor Production (GO:0032680)	0.210368	1.91055	0	0.0729747	0.999	57/100	37.52%	TLR2;NOD2;FCGR3A;FZD5;FADD;IL6;MC1R;THBS1;PTPN22;IL10;OAS3;CLEC4A;WNT5A;NLRC3;ARG2;ZFP36;OAS2;TNFAIP3;PYCARD;POMC;SPHK2;PTPN6;GHRL;C5AR2;FRMD8;CD14;SPN;RIGI;SETD4;LILRB1;LGALS9;FOXP1;GAS6;EHHADH;IFIH1;TLR3;TIRAP;LCP1;VSIR;STAT3;CYBA;HLA-E;EPHB2;LY96;CLEC7A;CD47;IRAK3;ILRUN;MAVS;TMEM106A;RIPK1;PTPN11;SIRPA;PSEN1;HAVCR2;TLR1;ARHGEF2	Micro
812	GO_Molecular_Function_2023__Delayed Rectifier Potassium Channel Activity (GO:0005251)	-0.402585	-1.90966	0.00505902	0.0454752	1	11/20	18.25%	KCNA4;KCNG1;KCNS3;KCNB1;KCNA3;KCNA7;KCNA2;KCNH1;KCNG3;KCNB2;KCNC2	Micro
813	GO_Molecular_Function_2023__Cytokine Activity (GO:0005125)	-0.301119	-1.90961	0	0.0452587	1	19/51	10.98%	CCL3;IL17D;CCL2;TNF;IL1B;CCL8;WNT10B;CCL4;INHBA;IFNE;CXCL13;FGF2;KITLG;IL1A;WNT5B;BMP8A;CX3CL1;CSF1;ENC1	Micro
814	GO_Biological_Process_2023__Nucleocytoplasmic Transport (GO:0006913)	0.274896	1.90866	0	0.0734261	0.999	42/48	54.41%	NUP210;CDAN1;NUP62;NUP188;LSG1;SEH1L;RAE1;GLE1;NUP37;NUP43;NUP155;CDKN1B;NUP160;SEC13;NUP35;NUP58;NDC1;NUP85;HNRNPA1;NUP93;NUP107;NUP153;NUP205;NUP54;NUP88;ANP32A;NUP98;NUP133;RSRC1;AHCTF1;ATXN1;XPO1;NUP214;NEMF;TPR;POM121;RANBP2;MALT1;NUP42;NUP50;UBE2I;NPM1	Micro
815	WikiPathway_2023_Human__Integrated Cancer Pathway WP1971	0.28712	1.90796	0.00274725	0.0734237	0.999	24/41	34.80%	BBC3;MYC;E2F1;CDKN1A;BLM;CDK2;CHEK1;CDKN2B;RAD50;CDC25B;BACH1;BAX;AKT1;STAT1;CASP9;NOXA1;CHEK2;CDKN1B;RB1;MDM2;CASP8;BCL2;BARD1;ATR	Micro
816	GO_Biological_Process_2023__Regulation Of Lipid Storage (GO:0010883)	0.410404	1.90498	0.00909091	0.0743214	0.999	8/17	13.93%	IL6;PLIN5;HILPDA;ITGB3;PPARG;PTPN2;ITGAV;IKBKE	Micro
817	GO_Biological_Process_2023__Regulation Of Telomere Maintenance (GO:0032204)	0.303189	1.90297	0.00840336	0.0748276	0.999	32/36	55.65%	MYC;EID3;SIRT6;RAD50;TINF2;GNL3;PML;ERCC4;HDAC8;SMG5;NBN;SLF1;TERF2;POT1;MRE11;SLF2;USP7;DHX36;SMG6;SMC5;SMG1;ATRX;NSMCE2;XRCC5;HNRNPD;YLPM1;SMC6;ERCC1;PPP1R10;UPF1;TERF1;TERF2IP	Micro
818	GO_Biological_Process_2023__Cellular Response To Molecule Of Bacterial Origin (GO:0071219)	0.223181	1.90166	0.00558659	0.0749644	0.999	33/84	22.84%	TLR2;NOD2;FCGR2B;GBP2;FZD5;SERPINE1;SHPK;IL6;TNFSF4;CD80;IL10;CD68;IRGM;WNT5A;ZFP36;TNFAIP3;PYCARD;CARD16;DAB2IP;MYD88;NFKBIB;SBNO2;GBP3;CASP7;HMGB2;CD14;LILRB1;VIM;CASP1;PDCD1LG2;XBP1;EHHADH;TNFRSF1B	Micro
819	GO_Biological_Process_2023__Response To Type II Interferon (GO:0034341)	0.267378	1.90062	0.00536193	0.0750766	0.999	31/51	33.49%	SLC11A1;TLR2;GBP2;IFITM2;GBP1;IFITM3;GBP4;TRIM21;WNT5A;GBP5;BST2;AQP4;DAPK1;GCH1;PDE12;CD58;CD40;CXCL16;SHFL;CASP1;STAT1;LGALS9;SP100;HLA-DPA1;IRF8;CIITA;KYNU;CD74;CALCOCO2;SYNCRIP;CD47	Micro
820	WikiPathway_2023_Human__Interferon Type I Signaling Pathways WP585	0.26184	1.89955	0.00544959	0.075134	0.999	41/51	49.40%	SOCS3;PIK3R2;STAT4;MAP2K3;PTPN6;STAT5A;EIF4EBP1;IFNAR2;STAT1;TYK2;STAT2;IRF9;RACK1;REL;IRS2;EIF4A1;CRKL;STAT3;RAPGEF1;PTPN11;IFNAR1;MTOR;MAPK14;PIK3CD;RPTOR;RPS6KB1;PTPRC;MAPKAP1;PIK3R1;RAP1A;PIAS1;CBL;MAP3K1;GAB2;CREB1;RAC1;EIF4E;JAK1;VAV1;EIF4B;CRK	Micro
821	WikiPathway_2023_Human__PKC Gamma Calcium Signaling Pathway In Ataxia WP4760	-0.392902	-1.89928	0.00865052	0.0485158	1	13/22	26.15%	TRPC3;PRKCG;ATP2B2;GRIA1;PLCB1;PLCB4;GNA11;GRIA2;GRIA3;GRM1;GRIA4;PLCB3;HOMER3	Micro
822	GO_Biological_Process_2023__Associative Learning (GO:0008306)	-0.462945	-1.89901	0.00173913	0.0483458	1	8/15	16.41%	CHRNB2;SHANK1;GRIN1;NETO1;DRD1;RGS14;BRSK1;MAP1A	Micro
823	GO_Biological_Process_2023__Positive Regulation Of Response To Wounding (GO:1903036)	-0.406918	-1.89669	0.00682594	0.04893	1	11/21	19.57%	CLDN1;ANXA1;ADRA2A;MDK;CLDN4;DUOX1;DMTN;OCLN;HRAS;MYLK;KANK1	Micro
824	GO_Biological_Process_2023__Regulation Of Epithelial Cell Migration (GO:0010632)	0.282434	1.89653	0.0080429	0.0762866	0.999	15/45	14.46%	INSL3;DOCK5;GLIPR2;CEACAM1;PTPRG;FGF10;EMP2;TGFB2;HIF1A;DOCK1;HYAL1;SOX9;DAB2IP;BMPER;DUSP10	Micro
825	GO_Biological_Process_2023__Positive Regulation Of Vasculature Development (GO:1904018)	0.229861	1.89408	0.00268817	0.0769801	0.999	19/75	8.40%	ANGPTL4;CCR3;CHI3L1;SMOC2;SERPINE1;VASH2;EMILIN2;VEGFA;THBS1;RAPGEF3;PRKD1;HMOX1;ZNF304;EMP2;CYP1B1;HIF1A;VEGFD;WNT5A;HYAL1	Micro
826	KEGG_2021_Human__Hepatitis B	0.190421	1.89012	0.00323625	0.0785541	0.999	111/136	57.69%	TLR2;JAK3;MAPK11;CCNA1;FADD;MYC;IL6;E2F1;PIK3R2;STAT4;CDKN1A;TGFB2;FOS;PIK3R3;MAPK13;IRF7;CDK2;TGFB3;MAP2K3;MYD88;CREB5;IKBKE;IRAK1;PCNA;TGFBR1;IKBKG;ATP6AP1;STAT5A;MAPK10;ARAF;BAX;AKT1;FAS;NFKBIA;STAT1;TYK2;ATF6B;ATF4;IFIH1;STAT2;CASP9;TLR3;DDB2;TIRAP;E2F3;MAP2K7;STAT3;PTK2B;STAT6;TRAF3;NFATC1;CHUK;RB1;NFKB1;CASP8;BCL2;NFATC2;MAVS;DDB1;IFNAR1;GRB2;STAT5B;MAPK14;CREB3L2;PIK3CD;IRAK4;PIK3CB;TBK1;M…	Micro
827	GO_Biological_Process_2023__Regulation Of Adaptive Immune Response (GO:0002819)	0.414697	1.88653	0.00694444	0.0801036	1	7/17	9.94%	FCGR2B;FADD;TNFSF4;IL4I1;IRF7;RIPK3;PYCARD	Micro
828	WikiPathway_2023_Human__B Cell Receptor Signaling Pathway WP23	0.216611	1.88613	0.00558659	0.079894	1	75/86	60.42%	BCL6;MYC;PIK3R2;HCLS1;RAC2;RASGRP3;PTPN6;IKBKG;MAP4K1;ETS1;AKT1;SHC1;NFKBIA;DAPP1;REL;CRKL;CHUK;VAV2;SH3BP2;PDPK1;NFKB1;LAT2;TEC;PIP5K1C;PRKCD;NFATC2;PIK3AP1;PTPN18;RAPGEF1;PTPN11;CDC42;GRB2;RPS6KA1;CARD11;MAPK14;MAX;NCK1;MAP2K1;PTPRC;PIP5K1A;LYN;SYK;PIK3R1;SOS1;RAF1;GTF2I;BRAF;GSK3B;MAPK1;CBL;ATF2;GAB2;MAP3K7;CREB1;IKBKB;NFATC3;MAPK8;RAC1;MAPK9;VAV1;MALT1;PRKCB;CRK;INPP5D;FOXO1;BTK;BLNK;BCL10;PL…	Micro
829	GO_Biological_Process_2023__Regulation Of Vasculature Development (GO:1901342)	0.358574	1.88558	0.00498753	0.079657	1	12/25	20.70%	EPHA2;GPNMB;VASH2;IL6;RAPGEF3;HMOX1;EMP2;BMPER;EGLN1;ETS1;WARS1;PLXND1	Micro
830	GO_Molecular_Function_2023__Amino Acid Transmembrane Transporter Activity (GO:0015171)	0.286988	1.88218	0.0027933	0.0808442	1	16/42	14.83%	SLC6A12;SLC47A1;SLC38A5;SLC38A11;SLC7A9;SLC6A13;SLC22A4;SLC7A5;SLC7A2;SLC1A3;SLC36A1;SLC7A1;SLC16A10;SLC1A2;SLC7A11;SLC1A5	Micro
831	KEGG_2021_Human__Inflammatory bowel disease	0.283513	1.8807	0.00263852	0.0811689	1	24/44	28.91%	TLR2;NOD2;IL18R1;IL21R;IL6;IL4R;HLA-DQB1;IL10;STAT4;TGFB2;TGFB3;HLA-DQA1;HLA-DOA;HLA-DRB5;HLA-DMA;STAT1;HLA-DPB1;TLR5;HLA-DMB;HLA-DRB1;STAT3;HLA-DPA1;STAT6;NFATC1	Micro
832	GO_Molecular_Function_2023__Ionotropic Glutamate Receptor Activity (GO:0004970)	-0.462186	-1.88064	0.00695652	0.0540014	1	10/15	24.81%	GRIN2C;GRIN2B;GRIN1;GRIN3A;GRIK4;GRIK5;GRIN2A;GRIA2;GRIA3;GRIA4	Micro
833	KEGG_2021_Human__Proteoglycans in cancer	0.178147	1.87346	0	0.0845876	1	33/166	8.67%	TLR2;IQGAP1;MAPK11;ITPR3;SDC2;FZD5;SDC4;VAV3;MYC;WNT3;CD44;VEGFA;THBS1;PIK3R2;ITGA2;ESR1;TIMP3;HPSE2;CDKN1A;TGFB2;HBEGF;GPC3;HIF1A;PIK3R3;TWIST2;ITGB3;WNT5A;CAV3;MAPK13;FLNA;HCLS1;FZD6;PLCE1	Micro
834	GO_Cellular_Component_2023__Secretory Granule Membrane (GO:0030667)	0.170618	1.87078	0	0.0850433	1	77/225	24.50%	SLC11A1;TLR2;IQGAP1;BST1;GPR84;CLEC5A;CD93;ADAM8;ITPR3;SLC2A3;FCGR2A;LILRB3;VNN1;CEACAM1;FPR2;SIRPB1;CD44;FCAR;IGF2R;ADGRG3;SIGLEC14;CR1;MOXD1;P2RX1;RAB4B;CD68;MGAM;ADGRE5;ITGB3;ALDH3B1;SELL;BST2;SLC18A2;LGALS3;SIGLEC9;FPR1;SIGLEC5;PLAUR;IQGAP2;HFE;ITGAV;C5AR1;ATP11A;AGPAT2;RAB5C;VAMP8;NFAM1;CD58;FCER1G;SLC2A5;HLA-B;ACP3;ENPP4;ITGAL;RAP2B;HLA-C;TMBIM1;TCIRG1;ATAD3B;CD14;ARL8A;NCSTN;TOM1;CPNE1;CD5…	Micro
835	GO_Biological_Process_2023__Neuron Projection Extension (GO:1990138)	-0.330552	-1.86779	0.00963082	0.0579045	1	20/34	33.00%	CDK5;NRN1;FLRT3;FLRT1;SEMA5A;NELL1;SSNA1;SH3GL2;MAP1B;SPAG6;NLGN3;SPACDR;HSP90AB1;HSP90AA1;TMEM108;NELL2;S100B;ULK1;ULK2;LLPH	Micro
836	GO_Biological_Process_2023__Learning (GO:0007612)	-0.32745	-1.86723	0.00666667	0.0578177	1	23/38	32.60%	CHRNB2;SHANK1;MAPK8IP2;SLC8A2;SLC8A3;SHANK3;SHANK2;RGS14;BRSK1;MAP1A;NLGN3;NLGN4X;NRXN1;FYN;CLN3;SLC6A1;NLGN4Y;NRXN3;PTN;CNTNAP2;NTRK2;SYT11;DLG4	Micro
837	GO_Molecular_Function_2023__Tau Protein Binding (GO:0048156)	-0.318749	-1.86703	0.00798722	0.0576248	1	35/39	58.14%	TTBK1;CDK5;BRSK2;STUB1;BRSK1;MARK1;MAP1A;GSK3A;BAG2;PIN1;MAP2;HSP90AB1;PPP2CA;FYN;HSP90AA1;DCTN1;S100B;CLU;TAOK2;BIN1;MARK4;PPP2CB;ROCK2;SNCA;PRKAA1;PICALM;DYRK1A;EP300;MARK3;GSK3B;TAOK1;TTBK2;MARK2;ROCK1;SMAD2	Micro
838	GO_Biological_Process_2023__Cellular Nitrogen Compound Biosynthetic Process (GO:0044271)	0.348875	1.86582	0.00724638	0.08666	1	13/25	21.23%	NOS1;MTARC1;ACER3;CYP1B1;GBA1;ARG2;CPS1;SPHK2;GCH1;SPTLC2;ACER2;SPTSSA;AKT1	Micro
839	GO_Biological_Process_2023__Sensory Organ Development (GO:0007423)	-0.309591	-1.86522	0.00165017	0.0580479	1	18/42	17.30%	SALL2;ASCL1;NEUROD1;OLIG2;PBX4;SMOC1;MEIS2;OLIG1;NEUROD2;ADAMTS18;PAX6;BHLHE22;PBX1;NEUROD6;SHROOM2;CHRDL1;BLOC1S3;POLR2D	Micro
840	GO_Biological_Process_2023__Regulation Of Platelet Aggregation (GO:0090330)	0.369582	1.86289	0.007109	0.0878038	1	7/21	5.49%	ALOX12;F11R;IL6;CEACAM1;GP6;EMILIN2;PDPN	Micro
841	GO_Biological_Process_2023__Positive Regulation Of Tumor Necrosis Factor Superfamily Cytokine Production (GO:1903557)	0.237537	1.86061	0.00251889	0.0886039	1	38/64	37.52%	TLR2;NOD2;FCGR3A;FZD5;FADD;IL6;THBS1;OAS3;WNT5A;OAS2;PYCARD;SPHK2;FRMD8;CD14;SPN;RIGI;SETD4;LGALS9;EHHADH;IFIH1;TLR3;TIRAP;LCP1;STAT3;CYBA;CD86;HLA-E;EPHB2;LY96;CLEC7A;MAVS;TMEM106A;RIPK1;PTPN11;PSEN1;HAVCR2;TLR1;ARHGEF2	Micro
842	GO_Biological_Process_2023__Regulation Of Axon Extension (GO:0030516)	-0.34092	-1.85962	0.00683761	0.0598772	1	17/32	31.01%	ISLR2;MAG;RTN4R;L1CAM;TRIM46;CTTN;MAPT;OLFM1;NTN1;PTPRS;MAP2;KIAA0319;NRCAM;RNF6;SEMA7A;MT3;TWF2	Micro
843	GO_Cellular_Component_2023__COPII-coated ER To Golgi Transport Vesicle (GO:0030134)	0.234072	1.8577	0.00555556	0.0892147	1	45/67	41.23%	SERPINA1;TMED3;HLA-DQA1;HFE;HLA-DRB5;HLA-F;HLA-B;IER3IP1;HLA-C;STX5;HLA-A;F8;TMED9;CNIH4;B2M;VTI1B;TGFA;LMAN2L;DDHD2;HLA-DRB1;GOSR2;HLA-DPA1;CTSC;SEC22B;KLHL12;SEC24D;HLA-E;GOLGA2;SEC13;CD74;TMED5;SEC24A;SAR1B;LMAN2;ERGIC1;LMAN1;CTSZ;TMED10;SEC23IP;VTI1A;ERGIC2;SLC30A5;SEC31A;USO1;ECPAS	Micro
844	GO_Molecular_Function_2023__Nuclear Localization Sequence Binding (GO:0008139)	0.388356	1.8568	0.00877193	0.0891746	1	17/18	53.17%	KPNA2;NFKBIA;TNPO2;NUP58;NUP153;TNPO1;KPNB1;NUP98;KPNA3;KPNA1;NUP214;KPNA4;KPNA5;POM121;KPNA6;POM121C;IPO5	Micro
845	KEGG_2021_Human__Th1 and Th2 cell differentiation	0.235331	1.85562	0.00569801	0.0894602	1	32/68	29.64%	JAK3;MAPK11;IL4R;HLA-DQB1;RUNX3;STAT4;DLL1;FOS;CD247;MAPK13;HLA-DQA1;HLA-DOA;NFKBIB;HLA-DRB5;IKBKG;NFKBIE;STAT5A;MAPK10;HLA-DMA;PRKCQ;NFKBIA;STAT1;RBPJ;NOTCH1;TYK2;HLA-DPB1;HLA-DMB;HLA-DRB1;HLA-DPA1;STAT6;NFATC1;CHUK	Micro
846	GO_Biological_Process_2023__Extracellular Structure Organization (GO:0043062)	0.239926	1.85341	0.00268097	0.0901424	1	24/65	15.45%	TGFBI;ADAMTS15;COL4A2;SMOC2;COL28A1;COL4A1;COL23A1;ADAMTS12;ADAMTS9;COL10A1;HPSE2;THSD4;ADAMTS19;ADAMTS14;SLC39A8;MANSC4;ADAMTS2;COLQ;FURIN;ADAMTS16;MMP14;ADAMTS17;TGFBR1;ADAMTSL4	Micro
847	GO_Molecular_Function_2023__Polyubiquitin Modification-Dependent Protein Binding (GO:0031593)	0.260409	1.84958	0.0078534	0.0916951	1	49/49	74.05%	TNFAIP3;MPND;ATRIP;RNF31;IKBKE;UBXN1;IKBKG;OTUD7B;WDR81;ZFAND2B;RAD23A;PARP10;TOM1;MINDY1;HDAC6;AGAP3;PSMD4;RAD18;ABRAXAS2;SPRTN;UFD1;ZRANB3;EPS15;PRPF8;TAB3;ASCC2;BABAM2;RNF169;RAD23B;UIMC1;ZFAND6;TAB2;ZBTB1;UBQLN1;MINDY2;RNF168;SQSTM1;ZRANB1;DZIP3;OTUD7A;VCP;SHARPIN;UBQLN2;UBQLN4;UBL7;TNIP2;FAAP20;OPTN;BAG6	Micro
848	KEGG_2021_Human__Viral myocarditis	0.263578	1.84664	0.00847458	0.0924609	1	28/48	31.92%	HLA-DQB1;CD80;LAMA2;HLA-DQA1;HLA-DOA;RAC2;HLA-DRB5;HLA-F;CD40;HLA-B;EIF4G1;ITGAL;CCND1;HLA-C;ICAM1;HLA-DMA;CD55;HLA-A;CASP9;HLA-DPB1;HLA-DMB;HLA-DRB1;HLA-DPA1;CD86;HLA-E;ITGB2;ABL2;CASP8	Micro
849	GO_Biological_Process_2023__Regulation Of Response To Biotic Stimulus (GO:0002831)	0.317322	1.84451	0.00492611	0.0932771	1	17/29	32.92%	FGR;FCGR2B;PTPN22;DHX58;DAPK1;LRP8;IRF1;HERC5;CD55;FOXP1;TREM2;TIRAP;TRIM5;TRAF3;ELMOD2;CASP8;ZMPSTE24	Micro
850	GO_Biological_Process_2023__Nuclear-Transcribed mRNA Catabolic Process (GO:0000956)	0.222738	1.84125	0.00547945	0.0945961	1	73/81	63.18%	PNLDC1;ZFP36;TNKS1BP1;PDE12;DCPS;CNOT3;PATL2;ZC3H12D;MAGOHB;EXOSC9;EXOSC8;ERI1;SMG5;CNOT11;XRN2;SMG9;MTPAP;SAMD4A;EXOSC10;PATL1;CNOT8;PYM1;EXOSC7;NCBP1;NBDY;CNOT6;GSPT1;DIS3L2;EIF3E;CTIF;TENT4B;XRN1;CNOT10;TUT7;DCP1A;CNOT2;THRAP3;TUT4;PARN;NBAS;SMG6;UPF2;DCP2;CNOT1;SMG1;TENT2;RC3H1;CNOT4;DDX5;CSDE1;ATM;SMG7;HBS1L;RC3H2;CNOT6L;UPF3A;SAMD4B;CNOT9;UPF3B;UPF1;RNPS1;NCBP2;ZFP36L1;PNRC1;CNOT7;PNRC2;DCP…	Micro
851	GO_Biological_Process_2023__Regulation Of Angiogenesis (GO:0045765)	0.180869	1.83906	0	0.0952736	1	53/151	22.10%	ANGPTL4;EPHA2;CCR3;CHI3L1;CEMIP2;COL4A2;SMOC2;GPNMB;SERPINE1;VASH2;IL6;CEACAM1;EMILIN2;VEGFA;THBS1;RAPGEF3;PRKD1;SULF1;THBS4;HMOX1;ZNF304;EMP2;KLF4;TGFB2;CYP1B1;HIF1A;CLDN5;VEGFD;WNT5A;HYAL1;MINAR1;TNFAIP3;DAB2IP;PPARG;BMPER;EGLN1;PPP1R16B;PDE3B;CD40;GHRL;ATP2B4;ETS1;WARS1;TNFSF12;ITGB8;SERPINF1;STAB1;HIPK2;PLXND1;MYDGF;PDCD6;STAT1;XBP1	Micro
852	GO_Biological_Process_2023__Skeletal System Development (GO:0001501)	0.209349	1.83363	0.00854701	0.0978744	1	33/93	19.50%	SH3PXD2B;BMP6;CHI3L1;MEPE;TGM2;CD44;FGFR3;ZBTB16;RFLNB;SULF1;COL10A1;RFLNA;TGFB2;COL27A1;BMP7;WNT5A;PHEX;HYAL1;SOX9;PTGER4;GJA1;GDF11;FGFR1;XYLT1;MMP14;TGFBR1;DDRGK1;FBN1;COL18A1;GHRL;OGN;ETS2;ITGB8	Micro
853	GO_Biological_Process_2023__Positive Regulation Of Cell Migration (GO:0030335)	0.166434	1.83175	0.00337838	0.0982516	1	58/222	15.46%	FGR;INSL3;GPER1;CXCR4;EPHA2;SH3RF2;FERMT1;PDGFD;GPNMB;DOCK5;GLIPR2;PLET1;VEGFA;THBS1;FAM107A;FGF10;PDPN;SEMA3A;ZNF304;TGFB2;HBEGF;ROR2;SEMA5B;SEMA4A;HIF1A;PIK3R3;SEMA4G;TWIST2;DAAM2;FAM89B;PDGFRB;DOCK1;HYAL1;SOX9;SEMA4B;TRADD;FBXO5;CD151;DDR2;TRIM32;SYNE2;DAB2IP;TRIP6;WASHC1;PDGFA;FERMT3;FERMT2;FAM83H;ZNF268;SEMA6B;S100A11;INSR;ACVR1B;MMP14;ZP3;ELP6;TGFBR1;DDRGK1	Micro
854	WikiPathway_2023_Human__Common Pathways Underlying Drug Addiction WP2636	-0.321884	-1.82842	0.00970874	0.0713827	1	32/36	57.41%	PPP1R1A;CAMK2A;GRIN1;CAMK4;ADCY1;DRD1;PRKCG;GRIA1;GRIN2A;CALM1;PPP1CA;GRIA2;GRIA3;GRM1;GRIA4;ACTG1;GRM5;ACTB;MAPK3;GNAI1;MAP2K2;PPP1CC;GNAS;PRKCA;PRKCB;PRKACB;PPP1CB;CREB1;MAPK1;RAP1B;RAP1A;RAF1	Micro
855	GO_Biological_Process_2023__Cell-Cell Adhesion Mediated By Cadherin (GO:0044331)	-0.391372	-1.82809	0.00853242	0.0712091	1	16/22	35.08%	CDH13;CDH7;CDH22;CDH2;CDH4;CDH9;CDH3;CDH11;CDH12;PLEKHA7;CDHR3;CDH8;CDH6;CDH10;CDH18;MMP24	Micro
856	KEGG_2021_Human__Th17 cell differentiation	0.221159	1.82618	0	0.10084	1	43/80	35.86%	JAK3;IL1R1;MAPK11;IL21R;IL6;IL4R;HLA-DQB1;FOS;HIF1A;CD247;MAPK13;IL27RA;HLA-DQA1;HLA-DOA;NFKBIB;HLA-DRB5;TGFBR1;IKBKG;NFKBIE;STAT5A;MAPK10;HLA-DMA;PRKCQ;RXRB;NFKBIA;STAT1;TYK2;HLA-DPB1;RXRA;HLA-DMB;HLA-DRB1;STAT3;HLA-DPA1;STAT6;NFATC1;CHUK;NFKB1;IL1RAP;RUNX1;NFATC2;STAT5B;MTOR;MAPK14	Micro
857	GO_Cellular_Component_2023__Caveola (GO:0005901)	-0.277107	-1.82449	0.00773994	0.072312	1	17/53	14.03%	FXYD1;CD320;CAV1;CDH13;F2R;PLPP2;EHD2;CAV2;ADTRP;PTGIS;SMPD2;DYNLL1;IRS1;CAVIN1;CAVIN2;SORBS1;SMO	Micro
858	GO_Molecular_Function_2023__Cytokine Receptor Binding (GO:0005126)	0.257562	1.82317	0.00791557	0.101993	1	15/51	10.94%	OSM;JAK3;FADD;IL6;TNFSF4;VEGFA;TGFBR3;IL10;CRLF1;TGFB2;VEGFD;IL34;PYCARD;OSMR;TRIP6	Micro
859	GO_Biological_Process_2023__Regulation Of Dendritic Spine Morphogenesis (GO:0061001)	-0.345721	-1.82072	0.00878735	0.073811	1	15/29	23.90%	CDK5;SRCIN1;CDK5R1;CAMK2B;SHANK3;EPHA4;DBN1;LZTS3;CUX2;KIF1A;ARHGAP44;NGEF;RELN;CFL1;PPFIA2	Micro
860	GO_Biological_Process_2023__Positive Regulation Of Response To Biotic Stimulus (GO:0002833)	0.296783	1.81953	0.00956938	0.103722	1	21/34	36.07%	CD1D;BMP6;ADAM8;PLSCR1;FADD;FPR2;EMILIN2;IFI35;GBP5;TLR8;SCIMP;POLR3G;POLR3B;TIRAP;TASL;CYBA;TRIM56;RNF185;LY96;POLR3C;SLC15A4	Micro
861	GO_Biological_Process_2023__Multivesicular Body Sorting Pathway (GO:0071985)	-0.383781	-1.81701	0.00699301	0.0752298	1	20/22	54.06%	CHMP4A;RILP;RAB27B;CHMP2A;CHMP6;LAPTM4B;EXPH5;CHMP3;SNF8;CHMP1B;VPS4A;CHMP7;DENND10;CHMP2B;CHMP5;MITD1;UVRAG;VTA1;VPS4B;RUBCN	Micro
862	GO_Biological_Process_2023__Negative Regulation Of Protein Localization To Nucleus (GO:1900181)	0.365067	1.81581	0.00705882	0.10541	1	19/20	57.73%	MDFIC;SIRT6;RAB23;OTUD7B;MFHAS1;POLR1A;FLCN;CHP1;ILRUN;MTOR;SIN3A;CTNNA1;LATS1;GSK3B;SUFU;UFM1;YWHAZ;LILRB4;SUMO1	Micro
863	GO_Cellular_Component_2023__Ficolin-1-Rich Granule Membrane (GO:0101003)	0.26242	1.81428	0.00847458	0.105345	1	18/48	20.77%	SLC11A1;CD93;SLC2A3;FPR2;FCAR;SIGLEC14;CR1;MGAM;LGALS3;FPR1;SIGLEC5;CD58;FCER1G;ENPP4;TCIRG1;ATAD3B;ARL8A;CD55	Micro
864	KEGG_2021_Human__Non-alcoholic fatty liver disease	-0.209808	-1.81361	0.004329	0.0765596	1	72/138	37.84%	TNF;IL1B;MAPK12;NDUFA7;NDUFA4L2;PRKAG1;PRKAA2;IL1A;COX7A1;NDUFA4;IRS1;CYP2E1;UQCRHL;NDUFC2;NDUFB11;NDUFB10;COX8A;NDUFV2;COX5B;NDUFA13;UQCR11;COX6A1;NDUFB3;CYCS;GSK3A;NDUFAB1;DDIT3;COX5A;UQCRB;COX6B1;CEBPA;NDUFS8;CYC1;UQCRFS1;COX7A2;NDUFA6;UQCRC1;COX4I1;NDUFA11;NDUFB7;UQCR10;NDUFB5;UQCRQ;NDUFB8;BCL2L11;COX7C;NDUFB2;SDHD;NDUFS3;JUN;NDUFA2;UQCRH;NDUFA8;NDUFA3;NDUFA12;NDUFA9;COX6C;NDUFB4;NDUFS5;NR1H3…	Micro
865	GO_Biological_Process_2023__Negative Regulation Of Supramolecular Fiber Organization (GO:1902904)	-0.256141	-1.81221	0.00784929	0.0766768	1	31/67	31.36%	SHANK1;SPEF1;TPX2;PLEKHH2;SLIT2;CLIP3;LDLR;TUBB4A;SHANK3;KATNB1;PFN2;STMN2;HSPA8;APC2;CRYAB;MYADM;CHADL;PFDN6;EMILIN1;CKAP2;BMERB1;KANK1;STMN1;CIB1;MAP2;HIP1R;ARPIN;HDGFL3;PFDN4;TWF2;CLU	Micro
866	KEGG_2021_Human__Arrhythmogenic right ventricular cardiomyopathy	-0.255623	-1.80928	0.00796178	0.0775061	1	35/65	32.50%	CACNA2D2;LEF1;LAMA1;ITGA8;ACTN2;CACNG8;PKP2;CACNG2;CACNG7;CACNG5;SLC8A2;SLC8A3;ITGB7;ITGA3;CACNG3;LMNA;TCF7L1;TCF7;CDH2;ITGA1;CACNB2;CACNA2D3;DAG1;JUP;RYR2;CACNA2D1;SGCD;ATP2A3;ACTG1;CACNB1;CTNNA3;DMD;ACTB;CACNB4;ITGA5	Micro
867	WikiPathway_2023_Human__Ebola Virus Infection In Host WP4217	0.191455	1.80888	0.00611621	0.105565	1	53/116	31.38%	SOCS3;IQGAP1;ITGA4;PIK3R2;ITGA2;HLA-DQB1;PIK3R3;ITGB3;CAV3;IRF7;FLNA;BST2;MFGE8;SCIN;DAB2IP;FLNB;NFKB2;HLA-DQA1;HLA-DOA;HLA-DRB5;ITGAV;HLA-F;IKBKE;VPS18;HLA-B;TPCN2;RELB;HLA-C;HAVCR1;HLA-DMA;RIGI;AKT1;HLA-A;VPS11;CTSB;STAT1;GAS6;EIF2AK2;HLA-DPB1;REL;HLA-DMB;NPC2;HLA-DRB1;ACTN4;HLA-DPA1;MERTK;NEDD4;HLA-E;VAV2;AXL;CD300A;NFKB1;EPS15	Micro
868	GO_Biological_Process_2023__Synaptic Vesicle Endocytosis (GO:0048488)	-0.31124	-1.80847	0.00981997	0.0775909	1	19/38	29.53%	CDK5;SYT5;PACSIN1;STX1A;SNCB;AP2S1;SNCG;SYT1;SH3GL2;VAMP2;DNAJC6;SH3GL3;NLGN3;NLGN4X;STON2;AP2M1;DNM1;SNAP91;NLGN4Y	Micro
869	GO_Molecular_Function_2023__Nuclear Receptor Binding (GO:0016922)	0.195873	1.80446	0.00882353	0.107369	1	93/102	67.94%	ZNF366;PADI2;OASL;GAS2L1;ESR1;PPARGC1A;RERG;HIF1A;TRERF1;TRIP6;MED16;CCDC62;SMARCD3;PHB2;MED22;DAXX;PAGR1;TADA3;STAT1;FOXP1;ARID5A;RXRA;ZBTB7A;DCAF13;SMARCE1;PPARGC1B;PROX1;PKN1;TAF11;KDM3A;MMS19;MED1;HMGN3;STAT5B;DCAF1;BAZ2A;PRMT2;TRIP12;MED14;TRIP4;KDM4C;NCOA6;LATS1;NCOA3;THRAP3;ASXL1;TAF1;STRN;CNOT1;NSD1;MED13;NCOA1;NCOR1;LCOR;JMJD1C;EP300;TACC1;NCOA2;CTNNB1;ARID1A;DDX5;SNW1;TCF7L2;MED4;GTF2H1…	Micro
870	GO_Molecular_Function_2023__K63-linked Polyubiquitin Modification-Dependent Protein Binding (GO:0070530)	0.342902	1.80177	0.00963855	0.108065	1	21/23	55.08%	TNFAIP3;ATRIP;RNF31;IKBKE;IKBKG;OTUD7B;WDR81;PARP10;SPRTN;ZRANB3;PRPF8;TAB3;RNF169;UIMC1;TAB2;ZBTB1;MINDY2;RNF168;SQSTM1;ZRANB1;OTUD7A	Micro
871	GO_Biological_Process_2023__Regulation Of Ossification (GO:0030278)	0.327666	1.80162	0.00947867	0.107652	1	13/26	23.07%	S1PR1;SGMS2;ZBTB16;LRP4;WNT5A;SOX9;DDR2;CHSY1;TENT5A;CCDC134;ENPP1;RBPJ;NOTCH1	Micro
872	KEGG_2021_Human__Osteoclast differentiation	0.189717	1.80144	0	0.107322	1	40/113	24.69%	SOCS3;TNFRSF11B;FCGR2B;IL1R1;MAPK11;FOSL2;FCGR3A;FCGR2A;LILRB3;SIRPB1;PIK3R2;TGFB2;FOS;FCGR1A;PIK3R3;FOSL1;FCGR2C;ITGB3;MAPK13;PPARG;NFKB2;LILRA1;OSCAR;MITF;TGFBR1;IKBKG;MAPK10;RELB;IFNAR2;LCP2;NCF4;CTSK;LILRB1;AKT1;NFKBIA;STAT1;TYK2;TREM2;STAT2;IRF9	Micro
873	GO_Biological_Process_2023__Fc-gamma Receptor Signaling Pathway Involved In Phagocytosis (GO:0038096)	0.366297	1.80067	0.00941176	0.107255	1	12/20	32.54%	FGR;FCGR2B;MYO1G;VAV3;YES1;PLA2G6;PRKCE;PLD2;LIMK1;PTK2;VAV2;PRKCD	Micro
874	GO_Biological_Process_2023__Regulation Of Response To External Stimulus (GO:0032101)	0.203712	1.80015	0.00561798	0.107111	1	52/92	38.47%	FGR;NOD2;FCGR2B;BST1;CXCR4;IL1R1;BCL6;SHPK;TNFSF4;ADAMTS12;USP18;PTPN22;WNT5A;DHX58;PTGS2;NLRP4;NLRP2;CARD16;SPATA2;MYD88;GRK4;SBNO2;LACC1;LRP8;IRF1;PSMA6;HERC5;CD55;CASP1;CASP4;FOXP1;TREM2;TIRAP;TRIM5;TRAF3;LETMD1;ELMOD2;AKNA;EPHB2;CASP8;ZMPSTE24;ALOX5;PIK3AP1;P2RX4;NMT1;UFL1;XIAP;AREL1;USP14;CYLD;SAMHD1;CAMKMT	Micro
875	GO_Biological_Process_2023__Sensory Perception Of Sound (GO:0007605)	-0.262841	-1.79527	0.00476948	0.0831986	1	37/59	39.72%	CHRNB2;TMIE;GRAP;LHFPL4;COL11A1;TMC2;CRYM;SLC26A4;COL4A3;ATP2B2;TIMM10;LHFPL5;MYH7B;DCDC2;LRP2;WFS1;KIT;SOD1;HPN;USH2A;GRM7;TIMM8B;PJVK;PDZD7;TIMM13;PCDH15;MKKS;CDH23;TPRN;TBL1X;CEMIP;USP53;HOMER2;ZNF354A;NDUFB9;CCDC50;SPNS2	Micro
876	GO_Biological_Process_2023__Positive Regulation Of Viral Genome Replication (GO:0045070)	0.340447	1.79456	0.00767263	0.109845	1	22/23	60.14%	TARBP2;IFIT1;PDE12;PPIE;RAD23A;TMEM39A;PPARA;DDB1;VAPB;SRPK1;LARP1;STAU1;PABPC1;SRPK2;TOP2B;PKN2;DDX3X;HACD3;PPID;CNOT7;PPIH;ADARB1	Micro
877	GO_Biological_Process_2023__RNA Processing (GO:0006396)	0.170371	1.79446	0	0.109423	1	169/176	77.34%	NOL3;PPARGC1A;SNRPD3;RBPMS;FASTKD3;SF3A2;TBRG4;PPP1R9B;RRAGC;ZMAT5;USB1;DDX23;DKC1;MAGOHB;EXOSC2;PRPF4;RP9;EXOSC9;EXOSC8;SF3A1;NOL9;ALKBH5;SNRPF;RBMS1;PDCD7;DUSP11;PABPC4;XRN2;DDX39B;SF3A3;SRSF9;BICD1;RBM3;RNGTT;HNRNPL;PRKACA;HNRNPUL1;EXOSC10;U2AF1;KIN;PRPF3;EXOSC1;WBP4;DHX8;PRPF8;HNRNPF;SYNCRIP;ADAR;NRDE2;EXOSC7;CELF2;ZRSR2;DIS3;RBMS2;ZCCHC8;THOC1;NCBP1;TENT4A;SRPK1;AKAP8L;RBM4;CSTF3;TENT4B;FAST…	Micro
878	WikiPathway_2023_Human__Bladder Cancer WP2828	0.282458	1.79297	0.00254453	0.109389	1	10/37	5.97%	MYC;TYMP;E2F1;FGFR3;VEGFA;THBS1;PIK3R2;CDH1;CDKN1A;HBEGF	Micro
879	GO_Biological_Process_2023__Inorganic Cation Import Across Plasma Membrane (GO:0098659)	0.215516	1.78952	0.00808625	0.110755	1	23/74	13.10%	SLC12A3;CACNA1I;KCNK9;KCNJ8;CACNA1F;SCNN1D;KCNJ10;KCNJ1;SCN7A;SLC9C2;KCNJ5;SLC9A7;KCNJ2;TRPV3;KCNJ13;SLC39A8;ATP1A2;SCN11A;CACNA1C;CACNA1B;SCN9A;ATP1B2;SLC39A12	Micro
880	GO_Biological_Process_2023__Positive Regulation Of Developmental Growth (GO:0048639)	-0.294962	-1.78221	0.0083612	0.0882949	1	21/41	31.01%	BDNF;CPNE6;ISLR2;UNC13A;L1CAM;GHR;MAPT;SYT3;CPNE5;SYT4;PLCB1;NTN1;CPNE9;SYT1;RIMS2;RASAL1;RIMS1;RNF157;SEMA7A;PPIB;TWF2	Micro
881	GO_Biological_Process_2023__Adenylate Cyclase-Modulating G Protein-Coupled Receptor Signaling Pathway (GO:0007188)	-0.224855	-1.77415	0.00742942	0.0919964	1	43/97	25.38%	ADGRB1;CALCR;PTHLH;ADM5;CORT;CHRM2;CNR1;ADRA1B;PTH1R;ADGRL4;GPR26;ADRA2A;ADCYAP1;AKAP5;GNAZ;GABBR1;VIP;PDE2A;ADGRF3;ADCY1;ADGRG2;VIPR1;DRD1;HTR1F;RAMP2;ADGRG6;ADGRB2;AKAP12;GNAO1;GABBR2;ADGRE3;ADGRF5;TSHR;GNA11;NPY1R;ADGRL3;GRM8;RIMS2;GNAL;CALCB;HTR1E;P2RY12;GPR37	Micro
882	GO_Biological_Process_2023__Anterograde Axonal Transport (GO:0008089)	-0.309693	-1.77293	0.00996678	0.0919898	1	30/38	52.32%	KIF4A;KIF5C;AP3B2;BLOC1S1;TRIM46;KIF1A;KIF5A;RAB27B;BLOC1S3;MAP1A;NEFL;HSPB1;BLOC1S4;AP3S2;SOD1;KIF3A;KIF3B;SNAPIN;KIF1C;AP3M2;APEX1;BLOC1S2;BLOC1S6;DLG2;MAPK8IP3;AP3D1;KIF1B;SPAST;ARL8B;TRAK2	Micro
883	GO_Biological_Process_2023__Regulation Of Cell Motility (GO:2000145)	-0.227495	-1.76797	0.00923077	0.093863	1	37/95	25.05%	SST;CAMSAP3;FGF17;FGF5;FGF9;CORT;SRCIN1;AMOTL2;TNR;TNC;FGF2;ROBO4;DUOX1;SPOCK2;MGAT3;SERPINE2;CAVIN1;FBLN1;LMNA;PLEKHG3;NTN1;FGF7;FGF1;PHPT1;LDB2;PARD6B;AMOT;PIN1;SGK3;ENPP2;FES;RHOB;TMSB10;CFAP20;FGF20;SPOCK3;BEX4	Micro
884	KEGG_2021_Human__cAMP signaling pathway	-0.19344	-1.76314	0.00144092	0.0959335	1	59/164	24.81%	SST;FXYD1;CREB3L1;GRIN2C;BDNF;ATP2B3;HTR1A;RAC3;CHRM2;F2R;GLI3;HCN2;NPY;SSTR1;NPPA;CNGA1;EDNRA;ADCYAP1;ATP1A3;CAMK2A;GABBR1;VIP;GRIN2B;PDE3A;RRAS;GRIN1;GRIN3A;CAMK4;CAMK2B;ADORA1;ADCY1;DRD1;CHRM1;SSTR2;HTR1F;GABBR2;CALM3;ATP2B2;GRIA1;GRIN2A;TSHR;CALM1;PPP1CA;NPY1R;HTR4;FSHR;ADRB1;GRIA2;SUCNR1;LIPE;PDE4D;PDE10A;PLN;GRIA3;CREB3;CALM2;HTR1E;RYR2;GRIA4	Micro
885	GO_Cellular_Component_2023__Lysosomal Lumen (GO:0043202)	0.220626	1.76178	0.00511509	0.12167	1	37/71	31.16%	SDC2;SDC4;GPC4;TCN2;GPC3;OMD;AGRN;GBA1;IFI30;HYAL1;HPSE;SGSH;VCAN;GPC6;CTSD;GPC5;IDUA;GLA;OGN;FUCA1;GALC;CTSK;CTSA;CTSB;ARSA;GALNS;NAGLU;NAAA;GUSB;NPC2;TPP1;MAN2B1;LGMN;ASAH1;GNS;CD74;GAA	Micro
886	WikiPathway_2023_Human__TYROBP Causal Network In Microglia WP3945	0.239185	1.76061	0.00828729	0.121568	1	50/59	57.67%	DPYD;HLX;RGS1;RUNX3;SPP1;HCLS1;PYCARD;SLC1A5;TGFBR1;STAT5A;GIMAP2;TCIRG1;CYTL1;CXCL16;C1QC;KCNE3;IL10RA;TNFRSF1B;CD37;NCF2;NPC2;PPP1R18;ITGB2;IL13RA1;RBM47;TMEM106A;RPS6KA1;LHFPL2;SLC7A7;FKBP15;SFT2D2;CREB3L2;IL18;NCKAP1L;CD4;ABCC4;ADAP2;APBB1IP;ITGAM;LOXL3;C3;CD84;SH2B3;SAMSN1;ITGAX;LYL1;PLEK;TYROBP;BIN2;ELF4	Micro
887	KEGG_2021_Human__B cell receptor signaling pathway	0.221759	1.75456	0	0.123575	1	59/70	57.78%	FCGR2B;LILRB3;VAV3;PIK3R2;FOS;PIK3R3;CD72;NFKBIB;RAC2;LILRA1;RASGRP3;PTPN6;IKBKG;NFKBIE;LILRB1;AKT1;NFKBIA;DAPP1;NFATC1;CHUK;VAV2;NFKB1;INPPL1;NFATC2;PIK3AP1;GRB2;CARD11;PIK3CD;PIK3CB;MAP2K1;LYN;SYK;PIK3R1;SOS1;PPP3CC;RAF1;GSK3B;MAPK1;PPP3CA;PPP3CB;SOS2;IKBKB;NFATC3;RAC1;KRAS;VAV1;PIK3CA;MALT1;PRKCB;INPP5D;AKT3;BTK;BLNK;BCL10;AKT2;PLCG2;LILRB4;MAP2K2;CD81	Micro
888	WikiPathway_2023_Human__Network Map Of SARS CoV 2 Signaling Pathway WP5115	0.176663	1.75385	0.00958466	0.123135	1	49/139	21.97%	CD163;IFI44L;CFB;DDIT4;SERPINE1;IL6;CASP5;IL10;IFITM3;C1R;IFI27;FOS;HIF1A;MX1;APOL1;CD247;PTGS2;BST2;DUSP1;IFI6;OAS2;AGT;IFIT1;LGALS3BP;CEBPB;APOC1;NFKB2;MYD88;ITIH4;CTSD;HLA-DRB5;AKT1S1;PTPN6;IRAK1;IKBKG;VPS18;EIF4EBP1;TP53I3;STEAP3;CD14;CXCL16;RIGI;PRKCQ;BTN3A1;C1S;AKT1;VPS11;CTSB;STAT1	Micro
889	MSigDB_Hallmark_2020__p53 Pathway	0.16829	1.7531	0.00347222	0.122253	1	73/177	28.37%	ST14;VDR;ALOX15B;NUPR1;EPHA2;RGS16;DDIT4;TP63;ZBTB16;VWA5A;S100A10;TCN2;NUDT15;HMOX1;CDKN1A;KLF4;HBEGF;FOS;ATF3;ITGB4;TM4SF1;IFI30;TAP1;NDRG1;AEN;FGF13;H1-2;PLK3;ABHD4;RALGDS;PDGFA;CDKN2B;IER5;CD82;BAK1;SLC7A11;CTSD;PRKAB1;TRAF4;VAMP8;ACVR1B;IRAK1;PCNA;CCND3;RETSAT;RAP2B;RRP8;DRAM1;FUCA1;STEAP3;SLC19A2;TXNIP;ISCU;H2AJ;BAX;CASP1;FAS;STOM;NOTCH1;CDKN2A;TGFA;ERCC5;RACK1;RXRA;DDB2;SEC61A1;UPP1;CCNG1;…	Micro
890	GO_Biological_Process_2023__Regulation Of Cytokine Production (GO:0001817)	0.186573	1.74881	0	0.123681	1	47/122	24.80%	FGR;IL15;SLC11A1;FCGR2B;BCL6;GPNMB;IL6;ACKR1;HILPDA;IL10;BATF;PLA2R1;TRIM21;ISG15;CLEC4A;PER1;IRF7;S100A13;RIPK3;PTGER4;AGT;TXK;ZBTB33;SRGN;BTN3A3;CADM1;AGPAT2;ZNF134;LITAF;NFAM1;HLA-B;BTN2A2;ZBTB2;C5AR2;BTN3A2;ICOSLG;RIGI;BTN3A1;LGALS9;FOXP1;TNFRSF1B;TREM2;HIC2;EIF2AK2;PATZ1;IFIH1;ASB1	Micro
891	GO_Biological_Process_2023__Negative Regulation Of Extrinsic Apoptotic Signaling Pathway (GO:2001237)	0.234514	1.74347	0.00817439	0.125813	1	23/56	22.30%	EYA2;SERPINE1;HSPA1B;THBS1;NOL3;HMOX1;EYA4;LGALS3;IFI6;TNFAIP3;EYA1;ITGAV;TGFBR1;TMBIM1;MCL1;ICAM1;FAIM;RFFL;SH3RF1;UNC5B;AKT1;AKR1B1;SIAH2	Micro
892	KEGG_2021_Human__Amyotrophic lateral sclerosis	-0.164602	-1.73834	0	0.107886	1	139/314	35.76%	GRIN2C;TNF;MAPK12;NEFH;NDUFA7;NDUFA4L2;NXT2;KIF5C;TUBA4A;DNAH5;MAP2K6;RAB39B;NEFM;GRIN2B;ALYREF;GRIN1;ATG101;TUBB2A;TUBB4A;PSMA8;PFN2;COX7A1;NDUFA4;KLC2;UQCRHL;NDUFC2;PSMC3;NDUFB11;NDUFB10;KIF5A;COX8A;NDUFV2;GRIA1;PFN4;COX5B;NDUFA13;DNAH12;SIGMAR1;GABARAP;GRIN2A;DNAH6;UQCR11;NEFL;COX6A1;NDUFB3;PSMD8;GPX1;DCTN3;CYCS;ATP5MC3;NDUFAB1;NRG4;DDIT3;ATP5MC1;GRIA2;COX5A;TUBB2B;PSMA2;ATP5PF;PSMB5;UQCRB;COX…	Micro
893	GO_Biological_Process_2023__Inorganic Cation Transmembrane Transport (GO:0098662)	-0.178987	-1.73416	0.00729927	0.109343	1	62/199	19.54%	CACNA1G;KCNS2;SLC30A3;HTR3B;KCNA4;ASIC1;SCN2B;KCNK3;KCNK2;TRPM5;SLC39A1;SLC6A9;SLC6A17;SLC39A4;SLC40A1;KCNG1;KCNK12;HCN2;KCNV1;SLC6A11;SLC30A10;TRPC5;TRPC6;KCNS3;KCNB1;KCNA3;SLC6A7;KCNA7;SLC8A2;KCNH3;ATP1A3;SLC8A3;KCNK1;SCN3B;SLC12A1;ABCC9;TRPC3;SCNN1A;KCNF1;KCNA2;SLC39A3;KCNQ2;ATP6V1F;KCNH1;ABCC8;KCNH5;TRPC4;SCN2A;TRPV4;KCNG3;HCN1;KCNB2;KCNN1;CCDC51;SLC46A1;SLC24A2;KCNA1;ATP5MF;KCNC2;KCNH7;KCND2…	Micro
894	GO_Biological_Process_2023__Plasma Membrane Bounded Cell Projection Organization (GO:0120036)	-0.20992	-1.73192	0.00625978	0.110117	1	37/112	20.78%	CDK5;UNC5A;CFAP61;FAM161B;NPY;LGI1;CDK5R1;GPRIN1;SAMD14;BLOC1S1;L1CAM;PQBP1;FLRT3;ATCAY;PPP1R9A;STMN2;CTTN;MAPT;RASGRF1;NCDN;BICDL1;RAB6B;BLOC1S3;TBC1D24;STMN4;SH3GL2;MAP1B;MICALL1;BLOC1S4;GPM6A;PHPT1;CNTN4;LAMB1;FAM161A;FRY;ARFIP2;STMN1	Micro
895	GO_Cellular_Component_2023__Azurophil Granule (GO:0042582)	0.178905	1.73066	0.00294985	0.132193	1	70/124	39.70%	RNASE2;ANXA2;PADI2;VNN1;CD68;ARG1;BST2;PYCARD;FPR1;STXBP2;HFE;RAB5C;GCA;VAMP8;UNC13D;NFAM1;IMPDH1;AGA;GLA;FTL;ACP3;STX3;FUCA1;ARL8A;NCSTN;TOM1;CPNE1;CTSA;PTGES2;RAB3D;STOM;ARSA;GALNS;MAGT1;DNAJC5;CPPED1;DDOST;ARHGAP45;GUSB;NPC2;CYB5R3;LPCAT1;MAN2B1;CPNE3;CTSC;PYGB;SDCBP;CREG1;GNS;DNAJC3;C3AR1;SNAP29;GAA;ACLY;PRKCD;NHLRC3;HEXB;TADA2A;BRI3;PSEN1;ARSB;RNASET2;DNAJC13;GLB1;PSMD1;SNAP23;FAF2;VAPA;LAMP…	Micro
896	WikiPathway_2023_Human__Spinal Cord Injury WP2431	0.201653	1.72698	0.00815217	0.132511	1	23/87	10.29%	IL1R1;NOS1;FCGR2A;LILRB3;COL4A1;MYC;IL6;GFAP;E2F1;TNFSF13B;FOS;ARG1;LTB4R;PTGS2;SOX9;E2F5;ZFP36;LGALS3;TACR1;CDK2;CHST11;AQP4;GJA1	Micro
897	WikiPathway_2023_Human__Acute Viral Myocarditis WP4298	0.213423	1.72448	0.00898204	0.133996	1	37/72	34.00%	NOD2;PTCRA;CXCR4;CCR3;NOS1;IL6;CD80;IL10;LAMA2;PYCARD;NFKB2;RAC2;MICA;CASP6;CASP7;EIF4G1;ITGAL;CCND1;HLA-DMA;CD55;BAX;AKT1;CASP1;STAT1;CASP9;TLR3;BCL2L1;TLR5;CASP2;STAT3;ILK;ITGB2;ABL2;BNIP2;CASP8;CAAP1;BCL2	Micro
898	GO_Biological_Process_2023__Import Into Nucleus (GO:0051170)	0.218948	1.72329	0.0078125	0.133827	1	56/67	55.88%	BCL3;NXT1;IPO13;CDAN1;SNUPN;HEATR3;PHB2;KPNA2;AKT1;NUP62;FAM53B;NUP188;TSC2;FAM53C;E2F3;STAT3;TNPO2;NUP155;SEC13;IPO7;NUP85;HNRNPA1;NUP93;CSE1L;NUP107;NUP153;TNPO1;NUP88;IPO8;KPNB1;IPO11;NUP98;NUP133;IPO9;TNPO3;STK3;APPL1;KPNA3;STK4;KPNA1;SYK;NUP214;KPNA4;KPNA5;TPR;POM121;APLP2;KPNA6;PTTG1IP;EIF4ENIF1;NUP50;POM121C;PPP1R10;IPO5;HIKESHI;RPAIN	Micro
899	GO_Cellular_Component_2023__Cell-Cell Junction (GO:0005911)	-0.17094	-1.72302	0.0041958	0.114419	1	101/236	32.60%	CDC42EP1;ADGRB1;CLDN1;PCDH1;TEK;PERP;CDH13;DLG3;CRB2;RND1;SHROOM4;RASIP1;PKP2;AJM1;ANXA1;ARVCF;JCAD;CDH7;CADM3;NECTIN1;PTK7;GJC1;CLDN4;FAT1;CCN3;PDZD11;FLRT1;CDH22;TMEM47;STXBP6;MPP3;LDB3;STARD10;LLGL1;FLRT2;OCLN;CLDN11;TRPC4;ACTN1;CCDC85B;SORBS1;TRPV4;LIN7B;CNN3;CDH2;BAIAP2L1;SCRIB;SHROOM2;CDH4;ILDR2;MYADM;CHAF1B;CDC42EP4;FBF1;TNFRSF25;PPP1CA;JAG1;PALS2;CDH9;CDH3;AHNAK;CDH11;LSR;CDC42BPA;PARD6A;…	Micro
900	KEGG_2021_Human__Breast cancer	-0.211733	-1.71994	0.00587372	0.116203	1	40/111	22.92%	HEY1;FGF17;FGF5;FGF9;AXIN2;LEF1;WNT10B;DLL3;NOTCH3;FGF2;IGF1;GADD45G;SHC4;GADD45A;WNT5B;FRAT1;APC2;TCF7L1;TCF7;ERBB2;EGF;FZD4;EGFR;FGF7;HRAS;FGF1;JAG2;JAG1;DVL2;KIT;HES1;SHC2;RPS6KB2;CDK4;NOTCH4;FZD3;FZD2;BRCA1;FZD1;LRP5	Micro
901	KEGG_2021_Human__Amoebiasis	0.216073	1.71632	0.00568182	0.135687	1	18/69	11.07%	TLR2;CD1D;IL1R1;GNA14;COL4A2;COL4A1;IL6;PIK3R2;IL10;TGFB2;PIK3R3;ARG1;LAMA2;LAMA4;ARG2;LAMA3;TGFB3;LAMC1	Micro
902	MSigDB_Hallmark_2020__Protein Secretion	0.200084	1.71522	0.00835655	0.136037	1	82/92	64.20%	IGF2R;GLA;NAPA;ARFGAP3;GALC;ANP32E;GOLGA4;PAM;ABCA1;GOSR2;CTSC;SEC22B;RER1;SEC24D;COG2;RPS6KA3;M6PR;AP3S1;LMAN1;STX12;YIPF6;OCRL;CLTC;TMED10;SSPN;SNAP23;TSG101;COPB1;LAMP2;DST;DNM1L;VPS45;SEC31A;USO1;ARFGEF2;AP3B1;ARFGEF1;MON2;RAB2A;MAPK1;AP2B1;STX7;DOP1A;SNX2;GBF1;CLCN3;RAB5A;STX16;ATP6V1H;VPS4B;CLTA;SGMS1;SCAMP1;COPB2;ADAM10;AP1G1;STAM;VAMP4;KIF1B;TMX1;NAPG;RAB14;SCRN1;GNAS;ICA1;RAB22A;PPT1;ARF…	Micro
903	GO_Cellular_Component_2023__Clathrin-Coated Vesicle Membrane (GO:0030665)	-0.236679	-1.69234	0.00796178	0.132841	1	29/71	25.07%	HLA-DQA2;SLC32A1;MYCBPAP;TYRP1;CHRM2;GAD2;HLA-DQB2;LDLR;HSPA8;GAD1;RAB3A;SLC18A1;GNAO1;AP2S1;EGF;FZD4;EGFR;SLC2A8;SYT1;SLC17A7;SH3GL2;LRP2;VAMP2;CLTB;CD9;FZD2;AP2M1;KIAA0319;SYT9	Micro
904	MSigDB_Hallmark_2020__KRAS Signaling Dn	-0.206125	-1.68742	0.0091047	0.135349	1	54/100	36.59%	NRIP2;SLC30A3;ABCB11;IGFBP2;KLK7;CLDN16;NUDT11;SYNPO;MAGIX;CHST2;CCDC106;SLC25A23;SNCB;GPRC5C;KCNQ2;ARHGDIG;CNTFR;EPHA5;SPTBN2;SIDT1;ZNF112;TCF7L1;CELSR2;SOX10;ARPP21;EGF;KCNN1;MYO15A;CLSTN3;GPR19;SNN;PDK2;NGB;YPEL1;PDE6B;CALCB;NR4A2;SLC16A7;RYR2;DCC;ENTPD7;GAMT;EFHD1;SELENOP;GRID2;TENM2;STAG3;BTG2;SLC29A3;ZC2HC1C;THNSL2;TFCP2L1;MFSD6;KCNMB1	Micro
905	GO_Biological_Process_2023__Regulation Of I-kappaB kinase/NF-kappaB Signaling (GO:0043122)	0.154342	1.6842	0.00701754	0.15203	1	97/201	35.85%	NOD2;TRIM6;FADD;TNFRSF19;PRKD1;ESR1;HMOX1;ALPK1;TRIM21;IRGM;TRIM39;WNT5A;PER1;SLC39A8;FLNA;NLRC3;BST2;S100A13;ROR1;TRIM25;TRADD;TFRC;TNFAIP3;PYCARD;CARD16;GJA1;TRAF1;TRIM32;DAB2IP;TMEM101;SHISA5;TIFA;MYD88;PIM2;RNF31;IKBKE;SPHK2;TRAF4;GPRC5B;IRAK1;LITAF;IKBKG;SLC20A1;CD40;OTUD7B;EDA2R;APOL2;IFIT5;TRAF3IP2;MUL1;GPR89A;NLRX1;CPNE1;NEK6;CASP1;NUP62;TRIM8;STAT1;LGALS9;DDX21;TREM2;TRIM62;SLC44A2;GOLT1…	Micro
906	GO_Biological_Process_2023__Cellular Response To Cytokine Stimulus (GO:0071345)	0.150812	1.67626	0.00680272	0.155934	1	42/209	10.99%	TLR2;GBP2;GPER1;CXCR4;JAK3;AIM2;MAPK11;TRIM6;CHI3L1;IL21R;SHPK;IL6;IL4R;FLT3;IFITM2;ADAMTS12;GBP1;STAT4;CRLF1;MT1X;GBP4;HIF1A;IRGM;WNT5A;GBP5;GBA1;MAPK13;HCLS1;HYAL1;SOX9;ZFP36;TRADD;MT2A;PTPRT;DUSP1;IL27RA;PYCARD;AQP4;OSMR;IFIT1;DAB2IP;DAPK1	Micro
907	GO_Biological_Process_2023__Positive Regulation Of DNA-binding Transcription Factor Activity (GO:0051091)	0.149213	1.65933	0	0.164422	1	68/204	23.99%	TLR2;NOD2;S100A8;S100A9;AIM2;TRIM6;ADAM8;IL18R1;IL6;VEGFA;HSPA1B;PLPP3;PRKD1;ESR1;IL10;PPARGC1A;ESR2;TRIM21;WNT5A;ADCY8;HCLS1;RIPK3;ROR1;TRIM25;TRADD;TFRC;CRTC3;PYCARD;SLCO3A1;CARD16;AGT;RHEBL1;DDR2;TRAF1;TRIM32;PPRC1;PPARG;TRIM14;MYD88;HDAC4;RNF31;IKBKE;FANK1;IRAK1;DDRGK1;NFAM1;IKBKG;CD40;EDA2R;PHB2;NLRC4;STK36;LRP8;CRTC2;ARID5B;PSMA6;RIGI;PRKCQ;HIPK2;AKT1;AKR1B1;TRIM8;LGALS9;TAF12;ZC4H2;EIF2AK2…	Micro
908	GO_Molecular_Function_2023__Calcium Ion Binding (GO:0005509)	-0.169406	-1.65848	0.00721501	0.154016	1	102/228	33.13%	CALB1;CD320;PRSS3;SYT10;ESYT3;CABCOCO1;MCTP2;CDH13;KCNIP3;VIL1;CPNE6;SYT5;BAIAP3;PLSCR4;AIF1L;CALB2;CDK5R1;FER1L5;ANXA1;MELK;SLIT2;CDH7;GRIN1;GALNT3;ENPP3;TUBB4A;SYT7;PCP4;SLC25A23;SYT13;SNCB;SPOCK2;ANXA6;DYSF;CLGN;CDH22;VSNL1;FBLN1;DNER;RPH3A;ANXA3;HPCAL4;SYT3;CDH2;ASPN;CALM3;SYT4;EFCAB11;CDH4;NCS1;CALM1;SYT1;ALPL;PITPNM1;CIB2;LRP2;RASGRP1;AIF1;CDH9;CDH3;CETN2;PLA2G4C;CDH11;NDUFAB1;CANT1;ADGRL3;…	Micro
909	GO_Biological_Process_2023__Recombinational Repair (GO:0000725)	0.186492	1.60112	0.00869565	0.193124	1	78/88	66.45%	FEN1;EID3;XRCC2;TONSL;XRCC3;RAD51AP1;BLM;RAD54B;RHNO1;KDM4D;GEN1;RBBP8;PALB2;PPP4C;AP5Z1;PSMD14;BRCA2;AP5S1;EXD2;ERCC4;ERCC5;CHD4;RAD51D;RPA2;TOP3A;WDR48;ZFYVE26;NBN;SLF1;RPA1;RECQL;MMS22L;INIP;NABP1;HELQ;INO80;MRE11;RNF169;SAMHD1;MCM9;MBTD1;SLF2;ZMYND8;REV3L;WRN;RAD51B;SPIDR;SMC5;NSMCE2;SFPQ;XRCC5;EPC1;RNF138;NUCKS1;YY1;RAD52;FBH1;RFWD3;MORF4L1;INTS3;ZSWIM7;NPC1;SMC6;SEM1;XRCC6;UBE2N;RMI1;RAD51C…	Micro
910	GO_Biological_Process_2023__Gene Expression (GO:0010467)	-0.154347	-1.59845	0.00937082	0.190696	1	146/278	43.66%	GSPT2;NXT2;IGF2BP3;MRPL9;STUB1;ALYREF;MRPL12;DDX25;EEF1A2;MRPL28;EXOSC5;MRPL55;RBM15B;MRPL23;M1AP;MRPL34;MRPS33;RPS15;MRPL27;MRPL43;MRPS15;RPL26;RPL18A;MRPL10;DDX19B;MRPL51;DHPS;RPS5;MRPL36;MRPL24;RPS27A;RPL19;MRPL11;RPS6KB2;RPS4Y1;MRPS12;RPL36AL;RPL39;FAU;MRPS7;MRPS6;NOVA1;RPS4X;DEDD2;RPL13A;RPL41;RPS26;RNASEL;RBM8A;RPL22;RPL10A;RPL32;RPS10;RPS23;RPL15;RPLP2;RPL27A;RPS11;RPL38;RPL29;RPL8;MRPL41;…	Micro
911	GO_Cellular_Component_2023__Secretory Granule Lumen (GO:0034774)	0.135788	1.52877	0.003367	0.233355	1	92/239	29.58%	FGR;RNASE2;S100A8;ANXA2;F13A1;S100A9;HK3;CHI3L1;CHIT1;PADI2;SERPINE1;CRISPLD2;PYGL;VEGFA;THBS1;HSPA6;TIMP1;TIMP3;SERPINA1;TGFB2;ARG1;VEGFD;DNASE1L1;TGFB3;PYCARD;CFD;POMC;HPSE;LGALS3BP;PDGFA;FERMT3;F3;S100A11;ITIH4;CTSD;SRGN;OSCAR;GCA;PTPN6;UNC13D;GSDMD;SERPINF2;IMPDH1;AGA;SERPING1;GHDC;GLA;PPIE;FTL;GHRL;PNP;NIT2;FUCA1;CRACR2A;PROS1;ALAD;CTSA;PTGES2;ARSA;GALNS;PSMD14;F8;GTPBP2;GAS6;GPI;MVP;CPPED1;…	Micro
912	GO_Biological_Process_2023__Positive Regulation Of Intracellular Signal Transduction (GO:1902533)	0.117175	1.49193	0.00387597	0.259607	1	119/431	21.58%	FGR;TLR2;NOD2;S100A8;IQGAP1;S100A9;OSM;GRM4;ADRA2C;BMP6;GPER1;NUPR1;TRIM6;CHI3L1;TGM2;ADAM8;RASD2;TNFSF14;BBC3;FADD;PDGFD;TNFRSF19;AVPI1;IL6;FLT3;MC1R;FGFR3;VEGFA;IFI35;THBS1;AKR1C3;PRKD1;TRAF7;FGF10;HMOX1;ALPK1;TGFB2;HBEGF;ROR2;BMP7;TRIM21;ADGRV1;SOX2;MYORG;HCST;WNT5A;PDGFRB;FLNA;HCLS1;BST2;S100A13;SOX9;PLCE1;ROR1;TRIM25;TRADD;TFRC;RBPMS;TGFB3;PYCARD;CARD16;POMC;GJA1;AGT;DDR2;TRIM32;DAB2IP;HPSE;…	Micro
913	KEGG_2021_Human__Pathways in cancer	0.110419	1.41789	0.00858369	0.306855	1	83/409	14.50%	IL15;ADCY4;PIM1;CXCR4;JAK3;PTGER3;GADD45B;COL4A2;FZD5;BBC3;CCNA1;FADD;COL4A1;MYC;WNT3;IL6;CKS2;IL4R;FLT3;E2F1;FGFR3;VEGFA;ZBTB16;PIK3R2;ITGA2;ESR1;GNG12;STAT4;FGF10;CDH1;HMOX1;EDNRB;CDKN1A;TGFB2;DLL1;ESR2;DVL1;FOS;HIF1A;PIK3R3;LAMA2;ADCY3;LAMA4;VEGFD;WNT5A;AR;PDGFRB;PTGS2;ADCY8;FZD6;LAMA3;PTGER4;CDK2;TGFB3;ADCY2;AGT;TRAF1;ADCY6;RALGDS;PTCH2;FZD8;DAPK1;PDGFA;LAMC1;EGLN3;CDKN2B;GSTM3;FRAT2;GNB2;PPA…	Micro
914	WikiPathway_2023_Human__Cytoplasmic Ribosomal Proteins WP477	-0.653501	-4.447	0	0	0	69/88	19.76%	RPS15;FAU;RPL8;UBA52;RPS26;RPS11;RPS21;RPL19;RPS28;RPL28;RPS27;RPLP2;RPS14;RPL29;RPL26;RPL27;RPS27A;RPL41;RPL36;RPS13;RPS9;RPL32;RPL24;RPL9;RPS18;RPL7A;RPS23;RPL10;RPL35;RPL18A;RPL13A;RPS8;RPLP1;RPS25;RPS5;RPS4X;RPS12;RPL12;RPL10A;RPS3A;RPL18;RPL38;RPL3;RPL11;RPS16;RPS17;RPS2;RPL30;RPL15;RPL7;RPS4Y1;RPL13;RPL23;RPL3L;RPS20;RPL34;RPL27A;RPL23A;RPL35A;RPL39;RPS6;RPL21;RPL5;RPS15A;RPS7;RPL4;RPL14;RP…	Astro
915	GO_Biological_Process_2023__Cytoplasmic Translation (GO:0002181)	-0.627019	-4.31402	0	0	0	78/92	27.53%	RPS15;FAU;RPL8;UBA52;RPS26;RPS11;RPS21;RPL19;RPS28;RPL28;RPS27;RPLP2;RPS14;RPL29;RPL26;RPL27;RPS27A;RPL41;RPL36;RPS13;RPS9;RPL32;RPL24;RPL9;RPS18;RPL7A;RPS23;RPL10;RPL35;RPL18A;RPL13A;RPS8;RPLP1;RPS25;RPL36AL;RPS5;RPS4X;RPL12;RPL10A;RPS3A;RPL18;RPL38;RPL3;RPL11;RPS16;RPS17;RPS2;RPL30;RPL15;RPL7;RPL13;RPS20;RPL34;RPL27A;RPL23A;MRPS12;RPL35A;RPL39;RPS6;RPL21;RPL5;RPS15A;RPS7;RPL4;RPL14;RPS19;RPS10;…	Astro
916	KEGG_2021_Human__Ribosome	-0.546878	-4.08792	0	0	0	97/131	27.53%	RPS15;FAU;RPL8;UBA52;RPS26;RPS11;RPS21;RPL19;RPS28;RPL28;RPS27;RPLP2;RPS14;RPL29;RPL26;RPL27;RPS27A;RPL41;RPL36;RPS13;RPS9;RPL32;RPL24;RPL9;MRPL17;RPS18;MRPL12;RPL7A;RPS23;RPL10;RPL35;RPL18A;RPL13A;MRPL36;RPS8;RPLP1;RPS25;RPL36AL;RPS5;RPS4X;RPS12;RPL12;RPL10A;RPS3A;MRPL28;MRPS17;RPL18;RPL38;RPL3;RPL11;RPS16;RPS17;MRPL23;RPS2;MRPL34;MRPS2;RPL30;RPL15;RPL7;RPS4Y1;RPL13;RPL23;MRPS7;RPL3L;RPS20;RPL34…	Astro
917	WikiPathway_2023_Human__Electron Transport Chain OXPHOS System In Mitochondria WP111	-0.581611	-3.95181	0	0	0	63/89	24.07%	COX8A;COX7A1;ATP5F1D;NDUFA13;NDUFS3;COX6A1;ATP5F1E;UQCR10;ATP5MC1;NDUFA11;SLC25A5;COX4I1;NDUFB10;COX7C;ATP5ME;UQCRQ;NDUFA3;NDUFB7;COX5B;NDUFB8;NDUFS5;ATP5MF;UQCR11;ATP5PO;NDUFC2;ATP5IF1;NDUFA1;ATP5MC3;UQCRH;COX6B1;NDUFA2;UQCRB;SLC25A4;NDUFB2;COX7A2;NDUFA7;ATP5PD;NDUFA4;ATP5F1B;COX6C;NDUFA6;NDUFS7;COX5A;ATP5PF;NDUFS8;UQCRFS1;NDUFB3;NDUFB5;NDUFB1;ATP5MG;SDHD;NDUFB9;COX7B;UCP3;NDUFA8;NDUFS2;NDUFAB1;…	Astro
918	GO_Cellular_Component_2023__Large Ribosomal Subunit (GO:0015934)	-0.661691	-3.84644	0	0	0	39/49	18.73%	RPL8;UBA52;RPL19;RPL28;RPLP2;RPL29;RPL26;RPL27;RPL41;RPL36;RPL32;RPL24;RPL9;RPL7A;RPL35;RPL18A;RPL13A;RPLP1;RPL36AL;RPL12;RPL10A;RPL18;RPL38;RPL3;RPL11;RPL30;RPL15;RPL7;RPL13;RPL3L;RPL34;RPL27A;RPL23A;RPL35A;RPL39;RPL21;RPL5;RPL4;RPL14	Astro
919	GO_Cellular_Component_2023__Cytosolic Large Ribosomal Subunit (GO:0022625)	-0.661691	-3.84644	0	0	0	39/49	18.73%	RPL8;UBA52;RPL19;RPL28;RPLP2;RPL29;RPL26;RPL27;RPL41;RPL36;RPL32;RPL24;RPL9;RPL7A;RPL35;RPL18A;RPL13A;RPLP1;RPL36AL;RPL12;RPL10A;RPL18;RPL38;RPL3;RPL11;RPL30;RPL15;RPL7;RPL13;RPL3L;RPL34;RPL27A;RPL23A;RPL35A;RPL39;RPL21;RPL5;RPL4;RPL14	Astro
920	GO_Biological_Process_2023__Peptide Biosynthetic Process (GO:0043043)	-0.491154	-3.79545	0	0	0	85/147	19.76%	MRPL55;RPS15;EEF1A2;FAU;RPL8;RPS26;RPS11;RPS21;RPL19;CARNS1;RPS28;RPL28;RPS27;RPLP2;RPS14;RPL29;RPL26;RPL27;RPS27A;MRPL51;RPL41;RPL36;RPS13;RPS9;RPL32;RPL24;RPL9;RPS18;MRPL12;PCSK1;RPL7A;RPS23;RPL10;RPL35;RPL18A;RPL13A;MRPL36;RPS8;RPLP1;RPS25;RPL36AL;RPS5;RPS4X;RPL12;RPL10A;RPS3A;MRPL28;MRPS17;RPL18;RPL38;RPL3;RPL11;RPS16;RPS17;MRPL41;MRPL23;RPS2;MRPL34;RPL30;RPL15;DHPS;RPL7;RPS4Y1;RPL13;MRPS7;RP…	Astro
921	GO_Biological_Process_2023__Mitochondrial ATP Synthesis Coupled Electron Transport (GO:0042775)	-0.592126	-3.71343	0	0	0	48/66	24.07%	COX8A;CYCS;NDUFS3;COX6A1;UQCR10;COX4I1;NDUFB10;COX7C;UQCRQ;NDUFA3;NDUFB7;COX5B;NDUFB8;NDUFS5;UQCR11;NDUFC2;NDUFA1;UQCRH;COX6B1;NDUFA2;CYC1;UQCRB;UQCC3;NDUFB2;COX7A2;NDUFA7;NDUFA4;COX6C;NDUFA6;NDUFS7;COX5A;NDUFS8;UQCRFS1;NDUFB3;NDUFB5;NDUFB1;SDHD;NDUFB9;COX7B;NDUFA8;COA6;NDUFS2;NDUFAB1;NDUFS6;UQCRC1;NDUFA12;NDUFB4;NDUFV1	Astro
922	GO_Cellular_Component_2023__Cytosolic Small Ribosomal Subunit (GO:0022627)	-0.694754	-3.66476	0	0	0	31/37	19.91%	RPS15;FAU;UBA52;RPS26;RPS11;RPS21;RPS28;RPS27;RPS14;RPS27A;RPS13;RPS9;RPS18;RPS23;RPS8;RPS25;RPS5;RPS4X;RPS3A;RPS16;RPS17;RPS2;RPS4Y1;RPS20;MRPS12;RPS6;RPS15A;RPS7;RPS19;RPS10;RACK1	Astro
923	KEGG_2021_Human__Oxidative phosphorylation	-0.508548	-3.65015	0	0	0	69/111	24.07%	COX8A;COX7A1;ATP5F1D;NDUFA13;NDUFS3;COX6A1;ATP5F1E;NDUFB11;UQCR10;ATP5MC1;NDUFA11;COX4I1;NDUFB10;COX7C;ATP5ME;UQCRQ;ATP6V1F;NDUFA3;NDUFB7;COX5B;NDUFB8;NDUFS5;ATP5MF;UQCR11;ATP5PO;NDUFC2;NDUFA1;ATP5MC3;UQCRH;COX6B1;NDUFA2;CYC1;UQCRB;ATP6V1G2;ATP6V0B;NDUFB2;COX7A2;NDUFA7;ATP5PD;NDUFA4;ATP5F1B;COX6C;NDUFA6;ATP6AP1;NDUFS7;COX5A;ATP5PF;NDUFS8;UQCRFS1;ATP6V0C;ATP6V0D2;NDUFB3;NDUFB5;NDUFA4L2;NDUFB1;ATP5…	Astro
924	GO_Biological_Process_2023__Aerobic Electron Transport Chain (GO:0019646)	-0.581542	-3.64377	0	0	0	46/64	24.07%	COX8A;CYCS;NDUFS3;COX6A1;UQCR10;COX4I1;NDUFB10;COX7C;UQCRQ;NDUFA3;NDUFB7;COX5B;NDUFB8;NDUFS5;UQCR11;NDUFC2;NDUFA1;UQCRH;COX6B1;NDUFA2;CYC1;UQCRB;UQCC3;NDUFB2;COX7A2;NDUFA7;NDUFA4;COX6C;NDUFA6;NDUFS7;COX5A;NDUFS8;UQCRFS1;NDUFB3;NDUFB5;NDUFB1;SDHD;NDUFB9;COX7B;NDUFA8;NDUFS2;NDUFAB1;NDUFS6;UQCRC1;NDUFB4;NDUFV1	Astro
925	GO_Biological_Process_2023__Macromolecule Biosynthetic Process (GO:0009059)	-0.453583	-3.6358	0	0	0	108/175	27.53%	MRPL55;RPS15;EEF1A2;FAU;RPL8;APOE;TYMS;RPS26;RPS11;RPS21;RPL19;RPS28;RPL28;RPS27;RPLP2;RPS14;RPL29;RPL26;RPL27;RPS27A;MRPL51;RPL41;B4GAT1;RPL36;RPS13;RPS9;RPL32;RPL24;RPL9;RPS18;MRPL12;RPL7A;RPS23;RPL10;RPL35;RPL18A;RPL13A;MRPL36;RPS8;RPLP1;RPS25;RPL36AL;RPS5;RPS4X;RPL12;RPL10A;RPS3A;MRPL28;MRPS17;RPL18;RPL38;RPL3;RPL11;RPS16;EEF1B2;RPS17;MRPL41;MRPL23;RPS2;MRPL34;TUFM;RPL30;EIF5A;RPL15;DHPS;RPL7…	Astro
926	GO_Cellular_Component_2023__Small Ribosomal Subunit (GO:0015935)	-0.678659	-3.59096	0	0	0	31/38	19.91%	RPS15;FAU;UBA52;RPS26;RPS11;RPS21;RPS28;RPS27;RPS14;RPS27A;RPS13;RPS9;RPS18;RPS23;RPS8;RPS25;RPS5;RPS4X;RPS3A;RPS16;RPS17;RPS2;RPS4Y1;RPS20;MRPS12;RPS6;RPS15A;RPS7;RPS19;RPS10;RACK1	Astro
927	GO_Biological_Process_2023__Cellular Respiration (GO:0045333)	-0.535624	-3.56467	0	0	0	54/83	24.07%	COX8A;BLOC1S1;NDUFA13;CYCS;NDUFS3;COX6A1;NDUFB11;UQCR10;NDUFA11;COX4I1;NDUFB10;COX7C;NR4A3;UQCRQ;NDUFA3;NDUFB7;COX5B;NDUFB8;NDUFS5;UQCR11;NDUFC2;NDUFA1;UQCRH;COX6B1;NDUFA2;CYC1;UQCRB;NDUFB2;COX7A2;NDUFA7;NDUFA4;COX6C;NDUFA6;NDUFS7;COX5A;MTLN;NDUFS8;UQCRFS1;NDUFB3;NDUFB5;NDUFB1;NDUFB9;ETFB;COX7B;MDH2;NDUFA8;NDUFS2;NDUFAB1;NDUFS6;UQCRC1;NDUFA12;NDUFB4;SURF1;NDUFV1	Astro
928	GO_Cellular_Component_2023__Ribosome (GO:0005840)	-0.586161	-3.53568	0	0	0	35/58	14.35%	RPL8;RPS26;RPS11;RPS21;RPL19;RPS28;RPS27;RPL27;RPL41;RPL36;RPS13;RPS9;RPL32;RPL24;RPL9;RPS18;RPL7A;RPS23;RPL18A;RPL13A;RPS25;RPL36AL;RPS5;RPS4X;RPL10A;RPL18;RPL38;RPL11;RPS17;RPL30;RPL15;MRPS7;RPL3L;MRPS12;RPL39	Astro
929	WikiPathway_2023_Human__Oxidative Phosphorylation WP623	-0.600049	-3.51765	0	0	0	38/51	24.07%	ATP5F1D;NDUFS3;ATP5F1E;ATP5MC1;NDUFA11;NDUFB10;ATP5ME;NDUFA3;NDUFB7;NDUFB8;NDUFS5;ATP5MF;ATP5PO;NDUFC2;ATP5MC3;NDUFA2;NDUFB2;NDUFA7;ATP5PD;NDUFA4;ATP5F1B;NDUFA6;ATP6AP1;NDUFS7;ATP5PF;NDUFS8;NDUFB5;NDUFA4L2;NDUFB1;ATP5MG;NDUFB9;ATP6AP2;NDUFA8;NDUFS2;NDUFAB1;NDUFS6;NDUFB4;NDUFV1	Astro
930	GO_Biological_Process_2023__Proton Motive Force-Driven Mitochondrial ATP Synthesis (GO:0042776)	-0.598485	-3.50581	0	0	0	38/52	24.07%	ATP5F1D;NDUFA13;NDUFS3;ATP5F1E;NDUFB11;NDUFA11;NDUFB10;ATP5ME;NDUFA3;NDUFB7;NDUFB8;NDUFS5;ATP5MF;ATP5PO;NDUFC2;NDUFA1;NDUFA2;NDUFB2;NDUFA7;ATP5PD;ATP5F1B;NDUFA6;NDUFS7;ATP5PF;NDUFS8;NDUFB3;NDUFB5;NDUFB1;ATP5MG;SDHD;NDUFB9;NDUFA8;NDUFS2;NDUFAB1;NDUFS6;NDUFA12;NDUFB4;NDUFV1	Astro
931	GO_Biological_Process_2023__Oxidative Phosphorylation (GO:0006119)	-0.572253	-3.50141	0	0	0	42/60	24.07%	ATP5F1D;NDUFA13;NDUFS3;ATP5F1E;NDUFB11;NDUFA11;NDUFB10;ATP5ME;NDUFA3;NDUFB7;NDUFB8;NDUFS5;ATP5MF;ATP5PO;NDUFC2;NDUFA1;UQCRH;NDUFA2;UQCRB;NDUFB2;NDUFA7;ATP5PD;ATP5F1B;NDUFA6;CHCHD10;NDUFS7;ATP5PF;NDUFS8;NDUFB3;NDUFB5;NDUFB1;ATP5MG;SDHD;NDUFB9;NDUFA8;NDUFS2;NDUFAB1;NDUFS6;UQCRC1;NDUFA12;NDUFB4;NDUFV1	Astro
932	GO_Molecular_Function_2023__Oxidoreduction-Driven Active Transmembrane Transporter Activity (GO:0015453)	-0.602639	-3.47825	0	0	0	39/52	24.14%	COX8A;COX7A1;NDUFS3;UQCR10;COX4I1;NDUFB10;COX7C;NDUFA3;NDUFB7;COX5B;NDUFB8;NDUFS5;NDUFC2;NDUFA1;UQCRH;COX6B1;NDUFA2;UQCRB;NDUFB2;NDUFA7;NDUFA4;NDUFA6;NDUFS7;COX5A;NDUFS8;CYB561D2;NDUFB3;NDUFB5;NDUFB1;NDUFB9;COX7B;NDUFA8;NDUFS2;NDUFS6;UQCRC1;NDUFA12;NDUFB4;NDUFV1;CYB561A3	Astro
933	GO_Biological_Process_2023__Proton Motive Force-Driven ATP Synthesis (GO:0015986)	-0.561451	-3.40461	0	0	0	41/59	24.07%	ATP5F1D;NDUFA13;NDUFS3;ATP5F1E;NDUFB11;ATP5MC1;NDUFA11;NDUFB10;ATP5ME;NDUFA3;NDUFB7;NDUFB8;NDUFS5;ATP5MF;ATP5PO;NDUFC2;ATP5MJ;NDUFA1;ATP5MC3;NDUFA2;NDUFB2;NDUFA7;ATP5PD;ATP5F1B;NDUFA6;NDUFS7;ATP5PF;NDUFS8;NDUFB3;NDUFB5;NDUFB1;ATP5MG;SDHD;NDUFB9;NDUFA8;NDUFS2;NDUFAB1;NDUFS6;NDUFA12;NDUFB4;NDUFV1	Astro
934	GO_Biological_Process_2023__Cilium Movement (GO:0003341)	0.478562	3.37748	0	0	0	36/57	20.94%	TTLL8;TEKT2;RSPH6A;TEKT1;CFAP73;SPAG6;TEKT3;CFAP54;RSPH4A;CLXN;DNAAF6;ROPN1L;SPAG17;CCDC39;TEKT5;TTC29;CFAP91;CFAP61;DNAH5;DNAI3;ODAD1;RSPH9;DNAH7;ODAD2;DNAI1;CFAP100;DNAAF4;PIERCE2;CFAP53;DNAAF1;SPA17;CABYR;CFAP251;ODAD4;HYDIN;DNAH9	Astro
935	GO_Biological_Process_2023__Translation (GO:0006412)	-0.402943	-3.36558	0	0	0	152/227	38.06%	MRPL55;RPS15;EEF1A2;FAU;RPL8;UBA52;AURKAIP1;GADD45GIP1;RPS26;RPS11;RPS21;RPL19;RPS28;RPL28;RPS27;RPLP2;RPS14;RPL29;RPL26;RPL27;RPS27A;MRPL51;RPL41;RPL36;RPS13;RPS9;RPL32;RPL24;RPL9;MRPL17;RPS18;MRPL12;MRPL54;RPL7A;RPS23;RPL10;RPL35;RPL18A;RPL13A;MRPL36;RPS8;RPLP1;MRPS34;RPS25;RPL36AL;RPS5;RPS4X;RPL12;RPL10A;MRPL40;NDUFA7;RPS3A;MRPL28;MRPS17;RPL18;RPL38;RPL3;RPL11;RPS16;EEF1B2;RPS17;MRPL41;MRPL23;…	Astro
936	GO_Cellular_Component_2023__Polysomal Ribosome (GO:0042788)	-0.698684	-3.33933	0	0	0	18/27	8.96%	RPL8;RPS26;RPS21;RPL19;RPS28;RPL41;RPL36;RPL32;RPL24;RPL7A;RPS23;RPL18A;RPL36AL;RPL10A;RPL18;RPL38;RPL11;RPL30	Astro
937	KEGG_2021_Human__Prion disease	-0.389453	-3.27523	0	0	0	127/236	28.07%	COX8A;COX7A1;ATP5F1D;EGR1;TUBA1B;NDUFA13;CYCS;NDUFS3;C1QB;COX6A1;ATP5F1E;NDUFB11;UQCR10;ATP5MC1;NDUFA11;SLC25A5;COX4I1;NDUFB10;COX7C;C1QA;TUBA4A;UQCRQ;NDUFA3;NDUFB7;COX5B;NDUFB8;PSMB6;NDUFS5;UQCR11;ATP5PO;NDUFC2;TUBB2A;TUBB4A;NDUFA1;ATP5MC3;CSNK2B;PSMC3;HSPA1A;UQCRH;COX6B1;NDUFA2;PSMD8;RAC2;DDIT3;GRIN1;CYC1;HSPA6;UQCRB;SLC25A4;HSPA1B;NDUFB2;GRIN3A;COX7A2;NDUFA7;ATP5PD;HSPA8;NDUFA4;ATP5F1B;COX6C;T…	Astro
938	GO_Molecular_Function_2023__Hormone Activity (GO:0005179)	-0.625452	-3.24252	0	0	0	34/36	33.48%	CRH;NPY;SST;CCK;VGF;CHGB;C1QTNF12;CCL25;POMC;VIP;PNOC;NPPA;NMB;IGF1;INSL6;AMH;APLN;UCN;AGRP;NPFF;METRN;HCRT;GHRL;INHBA;SPX;PTHLH;INHA;AGT;ASIP;EDN1;PYY;INHBB;GNRH1;CALCB	Astro
939	GO_Cellular_Component_2023__Mitochondrial Respiratory Chain Complex I (GO:0005747)	-0.587704	-3.20495	0	0	0	30/41	24.07%	NDUFA13;NDUFS3;NDUFB11;NDUFA11;NDUFB10;NDUFA3;NDUFB7;NDUFB8;NDUFS5;NDUFC2;NDUFA1;NDUFA2;NDUFB2;NDUFA7;NDUFA4;NDUFA6;NDUFS7;NDUFS8;NDUFB3;NDUFB5;NDUFB1;NDUFB9;NDUFA8;NDUFS2;NDUFC2-KCTD14;NDUFAB1;NDUFS6;NDUFA12;NDUFB4;NDUFV1	Astro
940	GO_Cellular_Component_2023__Respiratory Chain Complex I (GO:0045271)	-0.587704	-3.20495	0	0	0	30/41	24.07%	NDUFA13;NDUFS3;NDUFB11;NDUFA11;NDUFB10;NDUFA3;NDUFB7;NDUFB8;NDUFS5;NDUFC2;NDUFA1;NDUFA2;NDUFB2;NDUFA7;NDUFA4;NDUFA6;NDUFS7;NDUFS8;NDUFB3;NDUFB5;NDUFB1;NDUFB9;NDUFA8;NDUFS2;NDUFC2-KCTD14;NDUFAB1;NDUFS6;NDUFA12;NDUFB4;NDUFV1	Astro
941	KEGG_2021_Human__Parkinson disease	-0.378597	-3.15243	0	0	0	105/219	24.21%	COX8A;COX7A1;ATP5F1D;TUBA1B;NDUFA13;CYCS;NDUFS3;COX6A1;UCHL1;ATP5F1E;NDUFB11;UQCR10;ATP5MC1;NDUFA11;SLC25A5;UBA52;COX4I1;NDUFB10;COX7C;TUBA4A;UQCRQ;NDUFA3;NDUFB7;COX5B;NDUFB8;CALM3;PSMB6;NDUFS5;UQCR11;ATP5PO;NDUFC2;RPS27A;TUBB2A;UBB;TUBB4A;DUSP1;NDUFA1;ATP5MC3;PSMC3;UQCRH;COX6B1;NDUFA2;PSMD8;DDIT3;CYC1;UQCRB;SLC25A4;NDUFB2;COX7A2;NDUFA7;UBC;ATP5PD;NDUFA4;ATP5F1B;COX6C;TUBB4B;NDUFA6;PSMA8;NDUFS7;T…	Astro
942	GO_Biological_Process_2023__Energy Derivation By Oxidation Of Organic Compounds (GO:0015980)	-0.580879	-3.13632	0	0	0	21/39	9.72%	COX8A;CYCS;COX6A1;UQCR10;MT3;COX4I1;COX7C;NR4A3;UQCRQ;COX5B;MRAP2;UQCR11;UQCRH;COX6B1;CYC1;UQCRB;COX7A2;NDUFA4;COX6C;COX5A;MTLN	Astro
943	KEGG_2021_Human__Neuroactive ligand-receptor interaction	-0.363607	-3.03894	0	0	0	138/228	29.13%	CRH;NPY;SST;CCK;TAC1;ADRA2A;ADCYAP1;GABRD;OPRK1;SSTR3;CCKBR;LPAR4;NPY2R;GABRA1;MCHR2;GRID2;C3AR1;CHRM1;P2RY13;P2RY4;GABRG2;MCHR1;SSTR1;HTR2A;POMC;HRH3;GABRA5;HTR6;VIP;GRIN1;GRM2;CNR1;VIPR1;P2RX5;GRIN3A;GPR83;GRIK3;SSTR2;CHRNB2;HTR5A;HRH2;PTGIR;RXFP1;UTS2;NMB;VIPR2;ADRA2B;NPB;CHRNA1;TAC3;ADM;NPY1R;DRD1;EDNRB;GIPR;PRSS3;CALCR;GRM4;GNRHR;HTR2B;GLRA2;NMU;TACR2;GABRB2;GRIA1;GRIA3;NPY5R;GABRR3;PTGER3;A…	Astro
944	KEGG_2021_Human__Retrograde endocannabinoid signaling	-0.404624	-3.03196	0	0	0	72/135	24.67%	GNG3;GABRD;NDUFA13;NDUFS3;NDUFB11;SLC32A1;NDUFA11;NDUFB10;NDUFA3;NDUFB7;NDUFB8;NDUFS5;GABRA1;SLC17A7;NDUFC2;PTGS2;PLCB2;NDUFA1;SLC17A6;GABRG2;GABRA5;KCNJ5;NDUFA2;CNR1;SLC17A8;NDUFB2;PRKCG;NDUFA7;NDUFA4;GNG2;NDUFA6;KCNJ9;PLCB4;NDUFS7;CACNA1S;GABRB2;GRIA1;GRIA3;NDUFS8;GABRR3;GABRR1;NDUFB3;NDUFB5;NDUFA4L2;NDUFB1;PRKCB;GABRA4;MAPK12;NDUFB9;KCNJ6;GRIA4;DAGLA;GNB2;GABRG3;GNG4;GNG10;GRM5;NDUFA8;MAPK13;I…	Astro
945	GO_Biological_Process_2023__Aerobic Respiration (GO:0009060)	-0.497911	-3.03088	0	0	0	36/58	24.07%	ATP5F1D;BLOC1S1;NDUFA13;NDUFS3;NDUFB11;NDUFA11;NDUFB10;NDUFA3;NDUFB7;NDUFB8;NDUFS5;NDUFC2;NDUFA1;UQCRH;NDUFA2;UQCRB;NDUFB2;NDUFA7;NDUFA6;CHCHD10;NDUFS7;NDUFS8;NDUFB3;NDUFB5;NDUFB1;NDUFB9;MDH2;NDUFA8;NDUFS2;NDUFAB1;NDUFS6;UQCRC1;NDUFA12;NDUFB4;SURF1;NDUFV1	Astro
946	MSigDB_Hallmark_2020__Oxidative Phosphorylation	-0.364579	-2.97201	0	0	0	154/199	49.87%	COX8A;ATP5F1D;CYCS;NDUFS3;COX6A1;ATP5F1E;UQCR10;ATP5MC1;SLC25A5;COX4I1;COX7C;ATP5ME;UQCRQ;ATP6V1F;NDUFA3;GPX4;NDUFB7;COX5B;NDUFB8;TOMM22;ATP5MF;UQCR11;ATP5PO;NDUFC2;TIMM10;NDUFA1;TIMM13;ATP5MC3;UQCRH;COX6B1;NDUFA2;CYC1;UQCRB;SLC25A4;ATP6V0B;ATP1B1;NDUFB2;COX7A2;OAT;NDUFA7;ATP5PD;NDUFA4;ATP5F1B;COX6C;NDUFA6;ATP6AP1;NDUFS7;MRPL34;HSD17B10;SLC25A11;RHOT2;LDHB;ECH1;COX5A;ATP5PF;NDUFS8;UQCRFS1;ATP6V0C…	Astro
947	GO_Molecular_Function_2023__NADH Dehydrogenase (Ubiquinone) Activity (GO:0008137)	-0.586217	-2.95945	0	0	0	24/33	24.07%	NDUFS3;NDUFB10;NDUFA3;NDUFB7;NDUFB8;NDUFS5;NDUFC2;NDUFA2;NDUFB2;NDUFA7;NDUFA4;NDUFA6;NDUFS7;NDUFS8;NDUFB3;NDUFB5;NDUFB1;NDUFB9;NDUFA8;NDUFS2;NDUFS6;NDUFA12;NDUFB4;NDUFV1	Astro
948	GO_Biological_Process_2023__Mitochondrial Electron Transport, NADH To Ubiquinone (GO:0006120)	-0.567964	-2.89928	0	0	0	24/34	24.07%	NDUFS3;NDUFB10;NDUFA3;NDUFB7;NDUFB8;NDUFS5;NDUFC2;NDUFA2;NDUFB2;NDUFA7;NDUFA4;NDUFA6;NDUFS7;NDUFS8;NDUFB3;NDUFB5;NDUFB1;NDUFB9;NDUFA8;NDUFS2;NDUFAB1;NDUFS6;NDUFB4;NDUFV1	Astro
949	KEGG_2021_Human__Diabetic cardiomyopathy	-0.355455	-2.88932	0	0	0	83/175	24.11%	COX8A;COX7A1;ATP5F1D;NDUFA13;NDUFS3;COX6A1;ATP5F1E;NDUFB11;UQCR10;ATP5MC1;NDUFA11;SLC25A5;COX4I1;NDUFB10;COX7C;UQCRQ;NDUFA3;NDUFB7;COX5B;NDUFB8;NDUFS5;UQCR11;ATP5PO;NDUFC2;PLCB2;NDUFA1;GAPDH;ATP5MC3;UQCRH;COX6B1;NDUFA2;RAC2;CYC1;UQCRB;SLC25A4;NDUFB2;COX7A2;PRKCG;NDUFA7;ATP5PD;NDUFA4;ATP5F1B;COX6C;NDUFA6;PLCB4;NDUFS7;COX5A;ATP5PF;NDUFS8;PLN;UQCRFS1;PRKCZ;NDUFB3;NDUFB5;NDUFA4L2;PPIF;NDUFB1;PRKCB;SD…	Astro
950	GO_Molecular_Function_2023__NADH Dehydrogenase (Quinone) Activity (GO:0050136)	-0.562208	-2.86657	0	0	0	24/34	24.07%	NDUFS3;NDUFB10;NDUFA3;NDUFB7;NDUFB8;NDUFS5;NDUFC2;NDUFA2;NDUFB2;NDUFA7;NDUFA4;NDUFA6;NDUFS7;NDUFS8;NDUFB3;NDUFB5;NDUFB1;NDUFB9;NDUFA8;NDUFS2;NDUFS6;NDUFA12;NDUFB4;NDUFV1	Astro
951	GO_Cellular_Component_2023__Mitochondrial Inner Membrane (GO:0005743)	-0.317115	-2.83635	0	0	0	210/351	40.48%	COX8A;MRPL55;ATP5F1D;NDUFA13;CYCS;NDUFS3;COX6A1;ATP5F1E;SCO2;NDUFB11;UQCR10;ATP5MC1;COA3;NDUFA11;SLC25A5;COX4I1;NDUFB10;MICOS13;AQP8;COX7C;TMEM160;ATP5ME;UQCRQ;AURKAIP1;TYMS;NDUFA3;CKMT1A;GADD45GIP1;BCS1L;NDUFB7;COX5B;NDUFB8;MTFP1;NDUFS5;ATP5MF;UQCR11;ATP5PO;NDUFC2;ATP5MJ;MRPL51;TIMM10;NDUFA1;TIMM13;ENDOG;ATP5MC3;MRPL17;UQCRH;MRPL12;MRPL54;COX6B1;NDUFA2;CYC1;UQCRB;SLC25A4;MRPL36;UQCC3;MRPS34;NDUF…	Astro
952	KEGG_2021_Human__Coronavirus disease	-0.352232	-2.82048	0	0	0	96/188	24.81%	RPS15;C1QB;FAU;RPL8;UBA52;C1QA;RPS26;RPS11;FOS;ISG15;RPS21;RPL19;RPS28;RPL28;RPS27;RPLP2;RPS14;RPL29;RPL26;RPL27;RPS27A;RPL41;C3AR1;RPL36;RPS13;RPS9;RPL32;RPL24;RPL9;RPS18;RPL7A;RPS23;RPL10;RPL35;RPL18A;RPL13A;RPS8;RPLP1;RPS25;RPL36AL;RPS5;RPS4X;RPS12;RPL12;RPL10A;PRKCG;RPS3A;RPL18;RPL38;RPL3;JUN;RPL11;SELP;RPS16;RPS17;RPS2;RPL30;RPL15;RPL7;RPS4Y1;RPL13;RPL23;SYK;MASP2;RPL3L;RPS20;RPL34;RPL27A;PR…	Astro
953	GO_Cellular_Component_2023__Respiratory Chain Complex IV (GO:0045277)	-0.748452	-2.78286	0	2.76481e-05	0.001	13/15	16.98%	COX8A;COX6A1;COX4I1;COX7C;COX5B;COX6B1;COX7A2;NDUFA4;COX6C;COX5A;UQCRFS1;NDUFA4L2;COX7B	Astro
954	KEGG_2021_Human__Non-alcoholic fatty liver disease	-0.372287	-2.78112	0	2.69569e-05	0.001	65/136	24.71%	COX8A;COX7A1;NDUFA13;CYCS;NDUFS3;COX6A1;NDUFB11;UQCR10;NDUFA11;COX4I1;NDUFB10;COX7C;UQCRQ;NDUFA3;NDUFB7;COX5B;NDUFB8;FOS;NDUFS5;UQCR11;NDUFC2;NDUFA1;UQCRH;COX6B1;NDUFA2;DDIT3;CYC1;UQCRB;NDUFB2;COX7A2;NDUFA7;NDUFA4;JUN;COX6C;NDUFA6;NDUFS7;COX5A;NDUFS8;UQCRFS1;NDUFB3;NDUFB5;NDUFA4L2;NDUFB1;MLX;SDHD;MAPK12;NDUFB9;GSK3A;COX7B;CASP8;ATF4;NDUFA8;MAPK13;NDUFS2;NDUFC2-KCTD14;BAX;PIK3R3;NDUFAB1;NDUFS6;UQC…	Astro
955	GO_Biological_Process_2023__Mitochondrial Respiratory Chain Complex I Assembly (GO:0032981)	-0.476386	-2.77496	0	2.56733e-05	0.001	33/53	27.76%	NDUFA13;NDUFS3;NDUFB11;NDUFA11;NDUFB10;NDUFA3;BCS1L;NDUFB7;NDUFB8;NDUFS5;NDUFC2;NDUFA1;NDUFAF8;NDUFA2;NDUFB2;NDUFAF3;NDUFA6;NDUFS7;NDUFS8;NDUFB3;NDUFB5;NDUFB1;NDUFB9;NDUFA8;NDUFS2;NDUFAB1;DMAC1;NDUFB4;DMAC2;TMEM126A;OXA1L;NDUFAF4;TMEM186	Astro
956	GO_Biological_Process_2023__NADH Dehydrogenase Complex Assembly (GO:0010257)	-0.476386	-2.77496	0	2.56733e-05	0.001	33/53	27.76%	NDUFA13;NDUFS3;NDUFB11;NDUFA11;NDUFB10;NDUFA3;BCS1L;NDUFB7;NDUFB8;NDUFS5;NDUFC2;NDUFA1;NDUFAF8;NDUFA2;NDUFB2;NDUFAF3;NDUFA6;NDUFS7;NDUFS8;NDUFB3;NDUFB5;NDUFB1;NDUFB9;NDUFA8;NDUFS2;NDUFAB1;DMAC1;NDUFB4;DMAC2;TMEM126A;OXA1L;NDUFAF4;TMEM186	Astro
957	KEGG_2021_Human__Huntington disease	-0.32178	-2.77356	0	2.50762e-05	0.001	118/277	24.21%	COX8A;COX7A1;ATP5F1D;POLR2I;TUBA1B;NDUFA13;CYCS;NDUFS3;COX6A1;ATP5F1E;NDUFB11;UQCR10;ATP5MC1;NDUFA11;SLC25A5;COX4I1;NDUFB10;COX7C;TUBA4A;UQCRQ;NDUFA3;NDUFB7;COX5B;NDUFB8;PSMB6;NDUFS5;UQCR11;ATP5PO;NDUFC2;POLR2L;TUBB2A;POLR2J;PLCB2;TUBB4A;NDUFA1;ATP5MC3;PSMC3;UQCRH;COX6B1;NDUFA2;PSMD8;GRIN1;CYC1;UQCRB;SLC25A4;NDUFB2;COX7A2;ATG101;NDUFA7;STX1A;ATP5PD;NDUFA4;ATP5F1B;BDNF;COX6C;TUBB4B;NDUFA6;CREB3L1;…	Astro
958	GO_Cellular_Component_2023__Organelle Inner Membrane (GO:0019866)	-0.304978	-2.7665	0	2.45063e-05	0.001	219/374	40.48%	COX8A;MRPL55;ATP5F1D;NDUFA13;CYCS;NDUFS3;COX6A1;ATP5F1E;SCO2;NDUFB11;UQCR10;ATP5MC1;COA3;NDUFA11;SLC25A5;COX4I1;NDUFB10;MICOS13;AQP8;COX7C;TMEM160;ATP5ME;UQCRQ;AURKAIP1;TYMS;NDUFA3;CKMT1A;GADD45GIP1;BCS1L;NDUFB7;COX5B;NDUFB8;MTFP1;NDUFS5;ATP5MF;UQCR11;ATP5PO;NDUFC2;ATP5MJ;PTGS2;MRPL51;TIMM10;NDUFA1;TIMM13;ENDOG;ATP5MC3;MRPL17;UQCRH;MRPL12;MRPL54;COX6B1;NDUFA2;CYC1;UQCRB;SLC25A4;MRPL36;UQCC3;MRPS3…	Astro
959	GO_Cellular_Component_2023__Postsynaptic Density (GO:0014069)	-0.358453	-2.75536	0	2.39617e-05	0.001	72/147	26.54%	RPL8;CDK5;SHISA8;RPS27;RPS14;GRID2;RPS13;ADGRA1;RPS18;KCND2;GRIN1;RPS25;GRIN3A;GRIK3;RPL12;SLC8A3;RGS14;GAP43;RPL38;CACNG3;INSYN2B;PLPPR4;CDK5R1;SH2D5;SLC8A2;FABP5;CACNG8;LRRC7;RPL30;NEURL1;NETO2;ADD2;SYNDIG1;GRIA1;GRIA3;RPL7;HOMER3;SEMA4C;IQSEC3;SLC8A1;SRCIN1;SIGMAR1;GRIN2B;SHISA7;NETO1;ADGRB1;MAPK8IP2;RNF112;GRIA4;CACNG5;GRIN2A;DAGLA;GRIK1;RPL14;GRM5;RPS19;NLGN1;AKAP5;SHANK1;NSMF;SHANK2;KCND1;U…	Astro
960	KEGG_2021_Human__Alzheimer disease	-0.306492	-2.74269	0	2.34408e-05	0.001	135/328	24.21%	COX8A;COX7A1;ATP5F1D;TUBA1B;NDUFA13;CYCS;NDUFS3;COX6A1;ATP5F1E;NDUFB11;UQCR10;ATP5MC1;NDUFA11;SLC25A5;COX4I1;NDUFB10;COX7C;TUBA4A;CDK5;UQCRQ;APOE;NDUFA3;NDUFB7;COX5B;NDUFB8;CALM3;PSMB6;NDUFS5;UQCR11;ATP5PO;HRAS;NDUFC2;PTGS2;CHRM1;TUBB2A;PLCB2;TUBB4A;WNT7B;NDUFA1;GAPDH;ATP5MC3;CSNK2B;PSMC3;UQCRH;COX6B1;NDUFA2;PSMD8;DDIT3;GRIN1;PSENEN;CYC1;WNT7A;UQCRB;SLC25A4;DKK1;WNT10B;NDUFB2;GPR83;COX7A2;ATG101;…	Astro
961	WikiPathway_2023_Human__Mitochondrial Complex I Assembly Model OXPHOS System WP4324	-0.474586	-2.73531	0	2.29421e-05	0.001	31/50	27.76%	NDUFA13;NDUFS3;NDUFB11;NDUFB10;NDUFA3;NDUFB7;NDUFB8;NDUFS5;NDUFC2;NDUFA1;NDUFA2;NDUFB2;NDUFAF3;NDUFA7;NDUFA6;NDUFB3;NDUFB5;TMEM70;NDUFB1;NDUFB9;NDUFA8;NDUFS2;NDUFAB1;NDUFS6;DMAC1;NDUFA12;NDUFB4;NDUFV1;DMAC2;NDUFAF4;TMEM186	Astro
962	WikiPathway_2023_Human__Nonalcoholic Fatty Liver Disease WP4396	-0.364188	-2.72778	0	2.24641e-05	0.001	64/135	24.71%	COX8A;COX7A1;NDUFA13;CYCS;NDUFS3;COX6A1;NDUFB11;UQCR10;NDUFA11;COX4I1;NDUFB10;COX7C;UQCRQ;NDUFA3;NDUFB7;COX5B;NDUFB8;NDUFS5;UQCR11;NDUFC2;NDUFA1;VCAM1;UQCRH;COX6B1;NDUFA2;DDIT3;CYC1;UQCRB;NDUFB2;COX7A2;NDUFA7;NDUFA4;JUN;COX6C;NDUFA6;NDUFS7;COX5A;NDUFS8;UQCRFS1;NDUFB3;NDUFB5;NDUFA4L2;NDUFB1;MLX;NR1H4;SDHD;NDUFB9;GSK3A;COX7B;CASP8;ATF4;BBC3;NDUFA8;NDUFS2;NDUFC2-KCTD14;BAX;PIK3R3;NDUFAB1;NDUFS6;UQCR…	Astro
963	GO_Biological_Process_2023__Mitochondrial Respiratory Chain Complex Assembly (GO:0033108)	-0.399355	-2.70677	0	2.20057e-05	0.001	69/87	47.70%	NDUFA13;NDUFS3;SCO2;NDUFB11;COA3;NDUFA11;NDUFB10;NDUFA3;BCS1L;NDUFB7;NDUFB8;NDUFS5;NDUFC2;COX14;NDUFA1;NDUFAF8;NDUFA2;UQCC3;NDUFB2;NDUFAF3;NDUFA6;PET100;NDUFS7;PET117;SDHAF1;NDUFS8;UQCRFS1;NDUFB3;NDUFB5;NDUFB1;NDUFB9;NDUFA8;NDUFS2;COX16;NDUFAB1;DMAC1;NDUFB4;SURF1;DMAC2;TMEM126A;OXA1L;NDUFAF4;CHCHD4;UQCC2;CHCHD7;TMEM186;NDUFA9;ECSIT;NDUFC1;TMEM223;FOXRED1;COX17;COA8;SDHAF2;NDUFA5;NDUFAF1;LYRM7;SMI…	Astro
964	KEGG_2021_Human__Cardiac muscle contraction	-0.425643	-2.70371	0	2.15655e-05	0.001	30/68	11.96%	COX8A;COX7A1;ATP1A3;COX6A1;UQCR10;COX4I1;COX7C;UQCRQ;COX5B;UQCR11;MYH7;UQCRH;COX6B1;CYC1;UQCRB;ATP1B1;COX7A2;SLC8A3;CACNG3;COX6C;SLC8A2;CACNB3;CACNA1S;CACNG8;COX5A;TNNT2;ATP1A1;UQCRFS1;SLC8A1;CACNA2D4	Astro
965	GO_Molecular_Function_2023__Olfactory Receptor Activity (GO:0004984)	0.488999	2.67217	0	0.0075654	0.017	18/30	12.37%	OR2F1;OR6A2;OR52N4;OR8D4;OR2M4;OR52H1;OR2L2;OR13C5;OR13A1;OR7D2;OR2B8P;OR2L5;OR51I2;OR2M3;OR7A17;OR1A1;OR2L3;OR6J1	Astro
966	GO_Biological_Process_2023__Neuropeptide Signaling Pathway (GO:0007218)	-0.485344	-2.6677	0	4.22854e-05	0.002	28/42	25.58%	NPY;OPRK1;SSTR3;NXPH3;MCHR2;MCHR1;SSTR1;NXPH2;PNOC;GPR83;SSTR2;NPPA;GLRA2;NMU;AGRP;NTSR1;LTB4R2;GALR3;OPRM1;CYSLTR1;CMKLR2;GALR1;GLRA1;OPRD1;OPRL1;LTB4R;GPR37;SORCS1	Astro
967	GO_Biological_Process_2023__Axon Development (GO:0061564)	-0.387757	-2.65635	0	4.14722e-05	0.002	49/87	30.58%	CCK;NEUROD6;RAB3A;CDK5;BHLHE22;PLP1;NEUROD2;APLP1;OLIG1;ATOH7;SLITRK1;S100A6;NEFH;WNT7A;SSNA1;SEMA5A;L1CAM;GAP43;DSCAML1;PLPPR4;CRTAC1;CDK5R1;VASH2;SLITRK4;SLITRK5;OLIG2;EPHB3;SLITRK3;MGARP;NTNG1;RTN4RL2;TRIM46;PAK3;ANK3;MAP1B;DRD2;AMIGO1;DCC;MAP1A;POU4F1;NMNAT2;CNTN4;ZPR1;SVBP;NREP;BAIAP2;S100B;APP;MAP1S	Astro
968	WikiPathway_2023_Human__GPCRs Class A Rhodopsin Like WP455	-0.348978	-2.64993	0	4.06897e-05	0.002	82/137	28.52%	ADRA2A;OPRK1;SSTR3;CCKBR;LPAR4;NPY2R;CX3CR1;C3AR1;CHRM1;CXCR4;P2RY13;GPR3;P2RY4;MCHR1;SSTR1;HTR2A;HRH3;GPR34;GPR17;HTR6;CXCR5;OR2H2;CNR1;GPR83;SSTR2;HTR5A;HRH2;CMKLR1;PTGIR;GPR22;OR7C1;ADRA2B;GPR18;GPR27;GPR85;NPY1R;DRD1;GPR12;EDNRB;HTR2B;NPY5R;CCR10;PTGER3;HTR4;NTSR1;OR1F1;CHRM2;GALR3;HTR1F;OPRM1;ADRA1B;CYSLTR1;CMKLR2;GPR171;RGL4;GPR68;GALR1;PTAFR;GPR87;FPR1;DRD2;ADRA1D;CHRM3;GRPR;CNR2;OPRD1;GPR…	Astro
969	GO_Molecular_Function_2023__Neuropeptide Hormone Activity (GO:0005184)	-0.686659	-2.63596	0	3.92101e-05	0.002	12/15	16.69%	CRH;NPY;CCK;VIP;PNOC;NPPA;NMB;UCN;AGRP;NPFF;HCRT;SPX	Astro
970	GO_Molecular_Function_2023__Neuropeptide Activity (GO:0160041)	-0.686659	-2.63596	0	3.92101e-05	0.002	12/15	16.69%	CRH;NPY;CCK;VIP;PNOC;NPPA;NMB;UCN;AGRP;NPFF;HCRT;SPX	Astro
971	GO_Biological_Process_2023__Neurotransmitter Secretion (GO:0007269)	-0.483862	-2.62446	0	7.70198e-05	0.004	32/40	36.69%	SLC32A1;RAB3A;CDK5;CPLX1;OTOF;HRH3;SYT1;STX1A;SYN1;RPH3A;GRM4;SNAP25;CPLX2;VAMP2;LIN7B;SNCA;DOC2B;SNAPIN;DOC2A;SYT10;SYN2;DNAJC5;PPFIA3;RIMS2;RIMS1;PDZD11;NRXN2;UNC13A;DVL1;SYN3;SNPH;PIP5K1C	Astro
972	KEGG_2021_Human__Thermogenesis	-0.315325	-2.61842	0	7.56686e-05	0.004	86/205	25.00%	COX8A;COX7A1;ATP5F1D;NDUFA13;NDUFS3;COX6A1;ATP5F1E;NDUFB11;UQCR10;ATP5MC1;COA3;NDUFA11;COX4I1;NDUFB10;COX7C;ATP5ME;UQCRQ;NDUFA3;NDUFB7;COX5B;NDUFB8;NDUFS5;ATP5MF;UQCR11;ATP5PO;HRAS;NDUFC2;COX14;NDUFA1;ATP5MC3;UQCRH;NDUFAF8;COX6B1;NDUFA2;CYC1;CNR1;UQCRB;NDUFB2;NDUFAF3;COX7A2;NDUFA7;ATP5PD;ACTL6B;NDUFA4;ATP5F1B;NPPA;COX6C;NDUFA6;CREB3L1;NDUFS7;COX5A;ATP5PF;NDUFS8;UQCRFS1;MLST8;ACTB;NDUFB3;NDUFB5;ND…	Astro
973	GO_Cellular_Component_2023__Proton-Transporting ATP Synthase Complex (GO:0045259)	-0.647618	-2.61391	0	0.000109655	0.006	11/17	8.77%	ATP5F1D;ATP5F1E;ATP5MC1;ATP5ME;ATP5MF;ATP5PO;ATP5MJ;ATP5MC3;ATP5PD;ATP5F1B;ATP5PF	Astro
974	GO_Cellular_Component_2023__Mitochondrial Proton-Transporting ATP Synthase Complex (GO:0005753)	-0.647618	-2.61391	0	0.000109655	0.006	11/17	8.77%	ATP5F1D;ATP5F1E;ATP5MC1;ATP5ME;ATP5MF;ATP5PO;ATP5MJ;ATP5MC3;ATP5PD;ATP5F1B;ATP5PF	Astro
975	GO_Biological_Process_2023__Regulation Of Smooth Muscle Cell Proliferation (GO:0048660)	-0.447159	-2.61321	0	0.000107828	0.006	26/49	18.89%	HES5;NR4A3;ID2;APOE;BMP4;VIP;PTGIR;IGF1;IGFBP5;CCL5;TRIB1;PDGFB;CCN4;THBS1;IGFBP3;APOD;IL18;OGN;SERPINF2;NDRG4;IL12A;ELN;BMP2;CX3CL1;PHB1;EREG	Astro
976	GO_Cellular_Component_2023__Asymmetric Synapse (GO:0032279)	-0.348593	-2.60898	0	0.00010606	0.006	62/130	26.54%	RPL8;CDK5;SHISA8;RPS27;RPS14;RPS13;ADGRA1;RPS18;KCND2;GRIN1;RPS25;RPL12;SLC8A3;RGS14;GAP43;RPL38;INSYN2B;CDK5R1;SH2D5;SLC8A2;FABP5;CACNG8;LRRC7;RPL30;NEURL1;NETO2;ADD2;SYNDIG1;GRIA1;RPL7;HOMER3;SEMA4C;IQSEC3;SLC8A1;SRCIN1;SLC4A8;SIGMAR1;GRIN2B;SHISA7;NETO1;ADGRB1;MAPK8IP2;RNF112;CACNG5;GRIN2A;RPL14;RPS19;NLGN1;AKAP5;SHANK1;NSMF;SHANK2;NLGN4Y;KCND1;USP50;RTN1;GPER1;INSYN1;SAMD14;SHISA9;HIP1R;PRNP	Astro
977	MSigDB_Hallmark_2020__Myc Targets V1	-0.324639	-2.59524	0	0.000121741	0.007	172/198	57.54%	NME1;H2AZ1;SNRPD2;TYMS;NHP2;PPIA;CDC45;PSMD8;CYC1;RPS5;RPL18;EEF1B2;MRPL23;MYC;RPS2;HSPE1;TUFM;COX5A;RAN;RANBP1;PSMB3;PCBP1;PRPS2;SRSF2;KPNA2;LDHA;RPL34;PSMA7;LSM7;HSP90AB1;TRIM28;RPS6;RRP9;SLC25A3;NOP16;RUVBL2;RPL14;MRPL9;RPS10;RACK1;PRDX4;LSM2;APEX1;MCM2;PHB2;SRM;PA2G4;POLE3;NDUFAB1;MAD2L1;SET;MCM4;MCM7;C1QBP;RPL22;SRSF7;HSPD1;CCT7;NOP56;SRSF3;EIF4A1;RPL6;PSMC4;PGK1;PSMA4;PRDX3;SF3A1;PRPF31;ERH…	Astro
978	GO_Cellular_Component_2023__Voltage-Gated Potassium Channel Complex (GO:0008076)	-0.405517	-2.58062	0	0.00015404	0.009	50/69	34.36%	KCNF1;KCNE5;KCNK1;KCNMB2;KCNJ14;KCNJ4;KCNV1;KCNJ5;KCND2;DPP10;KCNA3;KCNJ16;KCNA1;KCNA4;KCNMB4;KCNS2;KCNG1;KCNS1;KCNA7;LRRC52;KCNC2;KCNH4;HCN2;KCNAB3;KCNA6;KCNV2;KCNN4;KCNE2;DPP6;KCNJ6;LRRC38;KCNAB1;KCNMB1;KCNG2;HCN1;KCND1;KCNJ8;KCNQ5;CNTNAP2;KCNIP4;KCNH1;KCNQ2;KCNB1;KCNC1;KCNJ3;KCNIP3;KCNAB2;KCNA2;KCNN1;HCN3	Astro
979	WikiPathway_2023_Human__Peptide GPCRs WP24	-0.476305	-2.57886	0	0.000185329	0.011	27/40	22.22%	OPRK1;SSTR3;CCKBR;NPY2R;CX3CR1;C3AR1;CXCR6;CXCR4;SSTR1;CXCR5;SSTR2;NPY1R;EDNRB;GNRHR;TACR2;NPY5R;CCR10;NTSR1;GALR3;OPRM1;GALR1;FPR1;ACKR1;GRPR;OPRD1;TSHR;OPRL1	Astro
980	GO_Cellular_Component_2023__Motile Cilium (GO:0031514)	0.343812	2.56256	0	0.0120486	0.036	34/68	24.01%	CFAP73;CFAP45;RSPH4A;DRC7;ROPN1L;ANXA1;CFAP300;SCNN1A;CFAP91;CFAP61;DNAJB13;DNAH5;TAS2R43;RSPH9;CFAP161;CFAP52;CFAP221;DNAH2;CFAP100;CATSPERG;MNS1;SORD;SAXO1;SPA17;CABYR;CFAP251;ODAD4;OFD1;RSPH1;DNAH9;AK8;IFT52;DAAM1;DNAI4	Astro
981	GO_Cellular_Component_2023__Potassium Channel Complex (GO:0034705)	-0.387841	-2.55705	0	0.000199067	0.012	51/76	32.84%	KCNF1;KCNE5;KCNK1;KCNMB2;KCNJ14;KCNJ4;KCNV1;KCNJ5;KCND2;DPP10;GRIK3;KCNA3;KCNJ16;KCNA1;KCNA4;KCNMB4;KCNS2;KCNG1;KCNS1;CCDC51;KCNA7;LRRC52;KCNC2;KCNH4;HCN2;KCNAB3;KCNA6;KCNV2;KCNN4;KCNE2;DPP6;KCNJ6;LRRC38;KCNAB1;KCNMB1;GRIK1;KCNG2;KCND1;KCNJ8;KCNQ5;CNTNAP2;KCNIP4;KCNH1;KCNQ2;KCNB1;KCNC1;KCNJ3;GRIK2;KCNIP3;KCNAB2;KCNA2	Astro
982	KEGG_2021_Human__Pathways of neurodegeneration	-0.273683	-2.55505	0	0.00019605	0.012	190/425	30.46%	COX8A;COX7A1;ATP5F1D;TUBA1B;NDUFA13;CYCS;NDUFS3;COX6A1;UCHL1;ATP5F1E;NDUFB11;UQCR10;ATP5MC1;NDUFA11;SLC25A5;UBA52;COX4I1;NDUFB10;COX7C;NEFL;TUBA4A;CDK5;UQCRQ;NDUFA3;NDUFB7;COX5B;NDUFB8;CALM3;PSMB6;NDUFS5;UQCR11;ATP5PO;HRAS;NDUFC2;RPS27A;PTGS2;CHRM1;TUBB2A;UBB;PLCB2;TUBB4A;WNT7B;NDUFA1;ATP5MC3;CSNK2B;PSMC3;UQCRH;NEFH;NEFM;COX6B1;NDUFA2;PSMD8;DDIT3;GRIN1;CYC1;WNT7A;UQCRB;SLC25A4;DKK1;WNT10B;NDUFB2;…	Astro
983	GO_Biological_Process_2023__Axoneme Assembly (GO:0035082)	0.407075	2.54606	0	0.011138	0.045	23/40	21.60%	JHY;HOATZ;RP1L1;RSPH6A;RSPH4A;RP1;DNAAF6;SPAG17;CFAP74;CCDC39;CFAP91;SPAG1;DNAJB13;RSPH9;CFAP46;PIERCE2;DNAAF1;LRRC43;RSPH1;HYDIN;DNAAF10;TTC26;LRGUK	Astro
984	GO_Biological_Process_2023__Positive Regulation Of Smooth Muscle Cell Migration (GO:0014911)	-0.654	-2.53184	0	0.000209218	0.013	11/16	14.36%	NR4A3;AIF1;IGF1;IGFBP5;VTN;S100A11;CCL5;PDGFB;CCN4;FGF9;NELL1	Astro
985	KEGG_2021_Human__Herpes simplex virus 1 infection	0.219209	2.52926	0	0.0102553	0.052	219/449	29.97%	ZNF560;SOCS3;TLR2;ITGA5;LTA;CCL2;OAS1;ZNF441;ZNF676;ZNF442;C3;HLA-DRA;OAS2;ZNF727;HLA-DPB1;CFP;CGAS;BIRC3;ZNF300;ZNF792;ZNF888;HLA-DRB1;ITGB3;IKBKE;ZNF813;ZNF816;ZNF468;ZNF257;SP100;ZNF564;ZNF99;ZNF709;ZNF311;ZNF208;ZNF114;FAS;ZNF600;EIF4EBP1;ZNF670;ZNF736;HLA-F;ZNF619;ZNF23;ZNF845;ZNF416;TLR3;ZNF229;ZNF285;ZNF556;ZNF597;ZNF214;ZNF90;POU2F2;ZNF343;PIK3CD;ZNF230;OAS3;ZNF554;ZNF19;ZNF700;ZNF101;ZNF…	Astro
986	GO_Biological_Process_2023__Signal Release From Synapse (GO:0099643)	-0.487021	-2.51966	0	0.000221998	0.014	28/35	36.69%	SLC32A1;RAB3A;CDK5;CPLX1;OTOF;HRH3;SYT1;STX1A;SYN1;GRM4;SNAP25;CPLX2;VAMP2;LIN7B;SNCA;SNAPIN;SYT10;SYN2;DNAJC5;PPFIA3;RIMS1;PDZD11;NRXN2;UNC13A;DVL1;SYN3;SNPH;PIP5K1C	Astro
987	KEGG_2021_Human__Nicotine addiction	-0.477685	-2.51354	0	0.000218781	0.014	22/37	18.37%	GABRD;SLC32A1;GABRA1;SLC17A7;SLC17A6;GABRG2;GABRA5;GRIN1;SLC17A8;GRIN3A;CHRNB2;GABRB2;GRIA1;GRIA3;GABRR3;GABRR1;CHRNA4;GABRA4;GRIN2B;GRIA4;GRIN2A;GABRG3	Astro
988	WikiPathway_2023_Human__Mitochondrial Complex IV Assembly WP4922	-0.510576	-2.49268	0	0.000369695	0.024	20/31	23.63%	COX8A;COX6A1;COA3;COX4I1;COX7C;COX5B;COX14;COX6B1;COX7A2;NDUFA4;COX6C;PET100;PET117;HIGD1A;COX5A;COX7B;COA6;PNKD;COX16;SURF1	Astro
989	GO_Biological_Process_2023__Positive Regulation Of Immune System Process (GO:0002684)	0.560344	2.49241	0	0.0124689	0.077	10/16	14.97%	C7;C6;GPR151;RSAD2;CFP;IL15;NCKAP1L;LGALS9;ZP3;PIK3CD	Astro
990	WikiPathway_2023_Human__Mitochondrial Complex III Assembly WP4921	-0.639133	-2.48935	0	0.000394862	0.026	9/15	10.60%	UQCR10;UQCRQ;BCS1L;UQCR11;UQCRH;CYC1;UQCRB;UQCC3;UQCRFS1	Astro
991	GO_Molecular_Function_2023__Voltage-Gated Potassium Channel Activity (GO:0005249)	-0.38494	-2.48381	0	0.000404354	0.027	44/71	27.71%	KCNF1;KCNE5;KCNK1;KCNJ14;KCNJ4;KCNV1;KCNJ5;KCND2;KCNA3;KCNJ16;KCNJ12;KCNA1;KCNA4;KCNK2;KCNJ9;KCNS2;KCNG1;KCNE4;KCNS1;KCNH6;KCNA7;KCNH3;LRRC52;KCNC2;KCNH4;HCN2;KCNA6;KCNT1;KCNV2;KCNH8;KCNE2;KCNJ6;LRRC38;KCNJ13;KCNG2;KCNJ8;KCNQ5;KCNH5;KCNH1;KCNH7;KCNQ2;KCNJ10;KCNB1;KCNC1	Astro
992	GO_Molecular_Function_2023__Receptor Ligand Activity (GO:0048018)	-0.306057	-2.47799	0	0.000428357	0.029	107/186	32.06%	CRH;SST;CCK;CSPG5;VGF;CHGB;NGF;SFRP2;C1QTNF12;CLCF1;GDF7;WNT7B;CCL25;BMP4;HSPA1A;POMC;VIP;ALKAL2;GREM1;WNT7A;SEMA5A;DKK1;WNT10B;FGF20;DAND5;DLL4;S100A4;NPPA;BDNF;ANGPTL3;NMB;GDNF;WNT8B;NBL1;IGF1;CD70;INSL6;SEMA7A;CCL5;MSTN;FGF8;AMH;PDGFB;WNT2;DPP4;SEMA3F;SEMA4C;APLN;CLEC11A;NRTN;VEGFA;VEGFB;METRN;IL18;FGF9;CD86;IL5;GRN;TIMP1;INHBA;IL12A;FGF7;PGLYRP1;BMP2;THPO;PSPN;PTHLH;TNFSF12;CX3CL1;NODAL;JAG2;…	Astro
993	GO_Cellular_Component_2023__Basement Membrane (GO:0005604)	0.377316	2.47169	0	0.0129693	0.093	22/45	16.91%	ANG;SMOC1;NID2;LAMA2;TINAG;COL4A6;COL15A1;COL4A4;LOXL2;HMCN1;P3H2;SMOC2;COL8A2;FRAS1;USH2A;COL4A3;COL4A1;COL23A1;LAMA5;HSPG2;LAMA3;FBN1	Astro
994	GO_Biological_Process_2023__Gene Expression (GO:0010467)	-0.285571	-2.46987	0	0.000422568	0.029	119/282	27.53%	MRPL55;RPS15;EEF1A2;FAU;RPL8;PRSS37;RPS26;RPS11;THOC6;RPS21;RPL19;RPS28;RPL28;RPS27;RPLP2;RPS14;RPL29;RPL26;RPL27;RPS27A;MRPL51;RPL41;RPL36;RPS13;STUB1;RPS9;RPL32;RPL24;RPL9;RPS18;MRPL12;RPL7A;RPS23;RPL10;RPL35;RPL18A;RPL13A;MRPL36;RPS8;RPLP1;RPS25;RPL36AL;RPS5;RPS4X;RPL12;RPL10A;RPS3A;MRPL28;MRPS17;RPL18;RPL38;RPL3;RPL11;RPS16;ALYREF;RPS17;MRPL41;ELAVL4;MRPL23;RPS2;MRPL34;RPL30;RPL15;DHPS;RPL7;R…	Astro
995	GO_Biological_Process_2023__Response To Ethanol (GO:0045471)	-0.62242	-2.46731	0	0.000416934	0.029	14/16	27.93%	CRHBP;GRIN1;GRIN3A;CHRNB2;ADH6;GLRA2;OPRM1;GRIN2B;DRD2;GRIN2A;GLRA1;SOD1;DRD4;SDF4	Astro
996	GO_Biological_Process_2023__Chemical Synaptic Transmission (GO:0007268)	-0.29022	-2.46478	0	0.000425636	0.03	111/244	26.36%	CRH;SST;GABRD;SNCB;CRHBP;OPRK1;SYT5;SLC32A1;CDK5;APOE;CPLX1;GABRA1;SNCG;NPTX2;PLP1;SLC17A7;GRID2;CHRM1;NPTX1;SLC17A6;GABRG2;KCNK3;HTR2A;CBLN1;HRH3;GABRA5;HTR6;KCND2;GRIN1;GRM2;SLC1A6;GAD2;SLC17A8;SYT1;PNOC;GRIN3A;GRIK3;CHRNB2;HTR5A;HRH2;UTS2;KCNA1;NSG1;KCNMB4;CHRNA1;SYN1;SLC12A5;CACNB3;GRM4;HTR2B;GLRA2;SNAP25;GABRB2;GRIA1;GRIA3;NPY5R;GABRR3;CHRND;HTR4;GABRR1;NPFF;NTSR1;LIN7B;SNCA;CHRM2;GALR3;HTR1…	Astro
997	GO_Biological_Process_2023__Regulated Exocytosis (GO:0045055)	-0.426016	-2.45156	0	0.000588151	0.041	33/48	34.56%	SYNGR3;CRHBP;RAB3A;CDK5;CPLX1;OTOF;CLTRN;SYT13;STX1A;RAB26;SNAP25;CPLX2;VAMP2;SNCA;SCIN;RIMS3;SYT6;RAB11FIP1;SNAPIN;SYT15;PLEK;SYT10;DNAJC5;SDF4;RIMS2;RAB11B;RIMS1;TMEM79;TPH1;SYNGR2;LYN;SYT11;SYNGR1	Astro
998	GO_Molecular_Function_2023__G Protein-Coupled Receptor Activity (GO:0004930)	-0.310973	-2.44742	0	0.000635907	0.045	84/165	25.20%	NPY;OPRK1;SSTR3;CX3CR1;MCHR2;C3AR1;CXCR6;ADGRA1;CXCR4;P2RY13;MCHR1;GPR34;GPR17;CXCR5;GRM2;CNR1;VIPR1;LGR6;GPR83;GPR183;CMKLR1;GPR22;RXFP1;GPR26;VIPR2;GPR55;GPR18;GPR27;GPR85;ADGRG3;DRD1;GIPR;GRM4;GPR61;GNRHR;ADGRG5;QRFPR;GPR62;S1PR2;NTSR1;ADGRE2;GPR88;LTB4R2;ADGRB2;ADGRG7;FFAR4;CALCRL;OPRM1;CYSLTR1;CMKLR2;GPR171;NPR3;PROKR2;GABBR2;GALR1;PTAFR;ADGRB1;GPR87;FPR1;AKR1B1;GRM3;DRD2;ADGRD2;S1PR3;ADGRD1…	Astro
999	WikiPathway_2023_Human__Oligodendrocyte Specification And Differentiation Leading To Myelin Components For CNS WP4304	-0.524163	-2.43656	0	0.000723401	0.051	13/24	10.50%	PLP1;OLIG1;MBP;BMP4;MAG;MOG;OMG;IGF1;ASCL1;PDGFB;OLIG2;SOX10;SOX8	Astro
1000	GO_Biological_Process_2023__Regulation Of Smooth Muscle Cell Migration (GO:0014910)	-0.577502	-2.4291	0	0.000768272	0.055	13/19	18.50%	IGF1;IGFBP5;VTN;S100A11;CCL5;TRIB1;PDGFB;CCN4;PLAU;IGFBP3;NELL1;NDRG4;SLIT2	Astro
1001	GO_Cellular_Component_2023__Postsynaptic Specialization Membrane (GO:0099634)	-0.468865	-2.42435	0	0.000812036	0.059	21/37	19.63%	GRID2;GRIN3A;GRIK3;CACNG3;PLPPR4;LRRTM2;CACNG8;SLITRK3;SYNDIG1;GRIA1;GRIA3;GRIN2B;NETO1;GRIA4;CACNG5;GRIN2A;DAGLA;LRRTM1;GRIK1;GRM5;NLGN1	Astro
1002	GO_Biological_Process_2023__Anterograde Trans-Synaptic Signaling (GO:0098916)	-0.305008	-2.41888	0	0.000854732	0.063	87/179	27.64%	CRH;SST;GABRD;SNCB;OPRK1;SYT5;CDK5;CPLX1;SNCG;NPTX2;PLP1;CHRM1;NPTX1;KCNK3;HTR2A;CBLN1;HRH3;HTR6;KCND2;GRIN1;GRM2;SLC1A6;GAD2;SYT1;PNOC;CHRNB2;HTR5A;HRH2;UTS2;KCNA1;KCNMB4;CHRNA1;SYN1;SLC12A5;CACNB3;GRM4;HTR2B;GLRA2;SNAP25;GABRB2;GRIA1;NPY5R;GABRR3;CHRND;HTR4;GABRR1;NPFF;NTSR1;SNCA;CHRM2;GALR3;HTR1F;GAD1;CHRNA4;HCRT;GRIN2B;GABBR2;SCN2B;GLRA3;KCNMB1;GRM3;GRIN2A;RIT2;HTR3B;GRIK1;CNP;CHRM3;GLRA1;DOC…	Astro
1003	GO_Cellular_Component_2023__Ionotropic Glutamate Receptor Complex (GO:0008328)	-0.476696	-2.40584	0	0.000987338	0.073	21/32	26.09%	SHISA8;GRID2;GRIN1;GRIN3A;GRIK3;CACNG3;CACNG8;GRIA1;GRIA3;VWC2L;VWC2;GRIN2B;SHISA7;OLFM2;GRIA4;CACNG5;GRIN2A;GRIK1;SHISA9;GRIN2D;GRIN2C	Astro
1004	GO_Biological_Process_2023__Synaptic Vesicle Cycle (GO:0099504)	-0.463178	-2.38931	0	0.00112962	0.084	19/34	20.50%	SLC32A1;RAB3A;CDK5;CPLX1;OTOF;SLC17A7;SLC17A6;WNT7A;SLC17A8;STX1A;SNAP25;CPLX2;SYNDIG1;SYT7;VAMP2;SNCA;SNAPIN;NLGN1;SYT10	Astro
1005	KEGG_2021_Human__Amyotrophic lateral sclerosis	-0.270388	-2.38429	0	0.00120513	0.091	132/326	27.26%	COX8A;COX7A1;ATP5F1D;TUBA1B;NDUFA13;CYCS;NDUFS3;COX6A1;ATP5F1E;NDUFB11;UQCR10;ATP5MC1;NDUFA11;COX4I1;NDUFB10;COX7C;NEFL;TUBA4A;UQCRQ;NDUFA3;NDUFB7;COX5B;NDUFB8;PSMB6;NDUFS5;UQCR11;ATP5PO;NDUFC2;TUBB2A;TUBB4A;NDUFA1;ATP5MC3;PSMC3;UQCRH;NEFH;NEFM;COX6B1;NDUFA2;PSMD8;DDIT3;GRIN1;CYC1;UQCRB;NDUFB2;COX7A2;ATG101;NDUFA7;ATP5PD;PFN2;NDUFA4;ATP5F1B;COX6C;ALYREF;TUBB4B;NDUFA6;CHCHD10;PSMA8;PFN1;DCTN3;NDUF…	Astro
1006	GO_Biological_Process_2023__Calcium-Ion Regulated Exocytosis (GO:0017156)	-0.518485	-2.37427	0	0.00129142	0.097	18/24	29.61%	SYT5;RAB3A;SYT4;CLTRN;SYT1;SYT13;SYT7;VAMP2;SCIN;RIMS3;SYT6;SYT2;DOC2B;SYT15;SYT10;SDF4;RIMS2;RIMS1	Astro
1007	GO_Molecular_Function_2023__Neurotransmitter Receptor Activity Involved In Regulation Of Postsynaptic Membrane Potential (GO:0099529)	-0.555913	-2.3725	0	0.00133855	0.1	16/20	31.73%	GRID2;GRIN3A;GRIK3;GRIA1;GRIA3;CHRND;GRIN2B;GRIA4;GRIN2A;GRIK1;GRIN2D;GRIN2C;CHRNE;GRIK2;CHRNB1;GABRA2	Astro
1008	GO_Biological_Process_2023__Sensory Perception Of Smell (GO:0007608)	0.449723	2.36701	0	0.0275297	0.211	12/24	10.05%	OR2F1;OR6A2;OR8D4;OR2M4;OR2L2;OR13C5;OR2B8P;OR2L5;OR51I2;NXNL2;OR2M3;OR2L3	Astro
1009	GO_Biological_Process_2023__Camera-Type Eye Development (GO:0043010)	0.490499	2.35599	0	0.0265256	0.229	14/19	28.26%	WT1;CRYBA4;TSKU;FBN2;CYP1B1;NES;PAX2;EFEMP1;FBN1;TENM3;CACNA1C;IFT122;SKI;CEP290	Astro
1010	GO_Biological_Process_2023__Metal Ion Transport (GO:0030001)	-0.310072	-2.34756	0	0.00177671	0.13	62/143	20.87%	KCNF1;SCN3B;KCNK1;SLC17A7;KCNMB2;SCN4B;KCNK9;RAMP2;KCNK3;KCNJ4;KCNV1;KCNJ5;GRIN3A;KCNA3;CHRNB2;KCNJ16;ASIC1;KCNJ12;RAMP3;KCNK7;CACNG3;KCNA1;KCNA4;LRP2;KCNMB4;SCN2A;KCNS2;KCNG1;CCL5;CACNB3;CACNA1S;KCNS1;CACNG8;SCN9A;SLC5A4;SCN5A;KCNH3;KCNH4;KCNAB3;SCNN1B;CAV1;KCNA6;TPT1;TRPC4;CHRNA4;CALCRL;SCN1A;SCN3A;SGK1;SELENOK;KCNN4;KCNJ6;SLC11A1;KCNAB1;CACNG6;KCNMB1;KCNJ13;FGF13;TRPV5;RYR2;TRPV4;KCNG2	Astro
1011	KEGG_2021_Human__ECM-receptor interaction	0.308041	2.34068	0	0.026647	0.245	34/78	16.93%	CD44;ITGA5;LAMA2;ITGA4;ITGA10;COL4A6;CD36;COL1A2;GP1BA;LAMC2;COL4A4;COL6A5;ITGA11;ITGB7;COL1A1;FRAS1;ITGA2B;ITGB4;ITGB3;HMMR;COL6A2;COL9A1;TNXB;ITGA1;GP6;LAMC3;VWF;COL4A3;COL4A1;FREM1;LAMA5;HSPG2;LAMA3;FREM2	Astro
1012	GO_Biological_Process_2023__Chemical Synaptic Transmission, Postsynaptic (GO:0099565)	-0.523161	-2.33829	0	0.00199905	0.147	16/23	26.91%	GRID2;GRIN1;INSYN2B;NPFF;CHRNA4;GRIN2B;MAPK8IP2;GSK3A;DRD2;GRIN2A;GLRA1;INSYN1;ARRB2;GRIN2D;GRIN2C;DRD4	Astro
1013	WikiPathway_2023_Human__GPCRs Other WP117	-0.381847	-2.33375	0	0.00210863	0.156	40/64	29.13%	CCKBR;MCHR2;P2RY13;HTR2A;GPR17;CNR1;GPR162;LGR6;GPR83;SSTR2;GPR183;RXFP1;GPR55;GPR18;GPR61;GNRHR;GPR62;NTSR1;ADGRE2;GPR88;LTB4R2;OR1F1;CHRM2;HTR1F;PROKR2;ACKR1;ADGRD1;ADRA1D;CHRM3;GRPR;ADGRG1;ADGRF5;CELSR1;S1PR1;CELSR3;DRD4;EDNRA;GRM8;P2RY11;HRH4	Astro
1014	MSigDB_Hallmark_2020__Pancreas Beta Cells	-0.490926	-2.32663	0	0.00220395	0.165	13/26	13.91%	SST;MAFB;CHGA;PCSK1;SYT13;DCX;VDR;DPP4;GCK;SRP14;SPCS1;PCSK2;PAK3	Astro
1015	GO_Biological_Process_2023__Regulation Of Calcium Ion-Dependent Exocytosis (GO:0017158)	-0.491135	-2.32144	0	0.00233236	0.175	15/26	20.50%	SYT5;SYT4;CBARP;SYT1;SYT13;STX1A;RPH3A;SYT7;BAIAP3;SYT6;SYT2;DOC2B;DOC2A;SYT15;SYT10	Astro
1016	GO_Biological_Process_2023__Dorsal/Ventral Pattern Formation (GO:0009953)	-0.526926	-2.31841	0	0.00231888	0.176	12/21	12.47%	GREM1;FBXL15;DSCAML1;NOG;WNT8B;NBL1;SFRP1;FGF8;ACVRL1;SIX3;TLL2;TLL1	Astro
1017	KEGG_2021_Human__Cytokine-cytokine receptor interaction	0.246169	2.31489	0	0.0311786	0.296	60/160	16.54%	IL1R1;IL1RL1;NGFR;TNFRSF12A;LTA;TNFSF8;CCL2;TNFRSF10D;IL13RA1;BMP5;IL19;TNFRSF1B;OSMR;GDF10;BMP6;TSLP;IL5RA;CXCL3;CXCL5;CXCL2;TNFRSF9;GDF15;CXCL13;EBI3;CSF2RB;IL18R1;CCR3;IL31RA;TNFRSF11B;IL15RA;IL23A;TNFRSF13C;IFNLR1;TNFRSF8;BMP8B;IL1RL2;IL15;CNTF;IL26;EDAR;EDA2R;IL25;IL16;TNFSF10;IL1RAP;TGFBR2;GDF9;TNFSF13;FAS;IL34;IL10RB;INHBC;IL20RB;CD40;IL6R;GHR;TNFRSF10B;CSF1;TNFRSF1A;LTBR	Astro
1018	GO_Cellular_Component_2023__Synaptic Vesicle Membrane (GO:0030672)	-0.400377	-2.30512	0	0.00270716	0.207	34/50	35.34%	SYNGR3;SYT5;SLC32A1;OTOF;SLC17A7;SYT4;SLC17A6;SLC17A8;SYT1;SV2B;RAB26;SYN1;RPH3A;SYNDIG1;VAMP2;SYNPR;SEMA4C;SYP;SV2A;SYT2;RAB3B;DOC2A;SYN2;SV2C;MCTP1;TMEM163;UNC13C;CLTB;SYPL2;SYNGR2;GABRA2;UNC13A;SYNGR1;SYN3	Astro
1019	GO_Cellular_Component_2023__Collagen-Containing Extracellular Matrix (GO:0062023)	0.214157	2.29395	0	0.0336941	0.341	109/301	17.84%	SERPINA3;ANG;PODN;ICAM1;ANXA2;ANXA8;ANGPT4;MATN1;MUC17;COL21A1;SMOC1;MMRN1;WNT8A;NID2;ADAMTS20;FCN2;AZGP1;SERPINC1;GDF10;COL8A1;MXRA5;LAMA2;TINAG;FIBCD1;MMP2;MATN3;SERPINE1;CILP;COL4A6;COL15A1;SULF1;ACAN;SRPX2;COL1A2;LAMC2;COL13A1;F13A1;GDF15;C1QC;COL4A4;COL20A1;COL6A5;PLG;LOXL2;HMCN1;TGM2;HPX;FGL1;P3H2;TINAGL1;PLSCR1;SMOC2;SERPINB8;F2;TGFBI;FBN2;CFP;COL8A2;COL1A1;FRAS1;ANXA1;LTBP2;CSPG4;ITIH5;AP…	Astro
1020	GO_Biological_Process_2023__Regulation Of Catecholamine Secretion (GO:0050433)	-0.507621	-2.29206	0	0.00305323	0.229	19/25	33.55%	SYT5;SYT4;HRH3;SYT1;FGF20;SYT13;CHRNB2;STX1A;SYT7;SNCA;CHRNA4;SYT6;SYT2;SYT15;SYT10;KCNB1;GRK2;KCNA2;SYT11	Astro
1021	GO_Biological_Process_2023__Pattern Recognition Receptor Signaling Pathway (GO:0002221)	0.353628	2.29007	0	0.0314902	0.344	26/45	27.10%	TLR2;ALPK1;FCN2;PLCG2;COLEC10;NOD2;NLRP3;MEFV;TLR5;CGAS;LACC1;COLEC11;INAVA;NLRP1;TLR3;RIGI;NLRC4;BCL10;IFIH1;TICAM1;NOD1;TLR4;MAVS;IRAK4;TRIM25;EHHADH	Astro
1022	GO_Biological_Process_2023__ATP Biosynthetic Process (GO:0006754)	-0.497927	-2.28386	0	0.00336962	0.248	13/24	17.15%	ATP5F1D;ATP5F1E;ATP5MC1;ATP5ME;ATP5MF;ATP5PO;ATP5MJ;ATP5MC3;ATP5PD;ATP5F1B;ATP5PF;ATP5MG;ALDOA	Astro
1023	GO_Cellular_Component_2023__9+2 Motile Cilium (GO:0097729)	0.329058	2.27658	0	0.0320629	0.37	27/57	21.72%	TTLL8;CABCOCO1;ODF1;RSPH6A;DCDC2C;CFAP45;TACR1;TEKT3;CFAP65;TCTE1;CFAP74;TEKT5;TTC29;CFAP58;DNAJB13;DNAH5;RSPH9;QRICH2;CFAP52;CFAP221;DNAH2;SAXO1;CFAP251;ODAD4;RPGR;DNAH9;AK8	Astro
1024	WikiPathway_2023_Human__Complement System WP2806	0.30713	2.27549	0	0.0300935	0.373	30/70	16.08%	ICAM1;ICAM2;C7;TLR2;C4A;CFI;FCN2;C6;C5AR1;C4BPA;C3;F13A1;CD93;PTX3;PLG;SELL;CFP;C5AR2;ITGA2B;SERPING1;ITGB3;SELPLG;CR1;ALB;C2;CD55;PROS1;CD40;LAMA5;PLAUR	Astro
1025	GO_Biological_Process_2023__Regulation Of Dopamine Secretion (GO:0014059)	-0.52564	-2.27138	0	0.00381288	0.277	13/21	20.50%	SYT5;SYT4;SYT1;FGF20;SYT13;CHRNB2;GDNF;SYT7;SNCA;SYT6;SYT2;SYT15;SYT10	Astro
1026	WikiPathway_2023_Human__Complement And Coagulation Cascades WP558	0.343181	2.27075	0	0.029421	0.383	22/46	16.08%	C4B;C7;CFI;SERPINC1;C6;C5AR1;SERPINE1;TFPI;C3;C1QC;CPB2;PLG;F2;C1R;SERPING1;CR1;C2;CD55;VWF;PROS1;F2R;PLAUR	Astro
1027	WikiPathway_2023_Human__Cholesterol Synthesis Disorders WP5193	-0.566402	-2.26972	0	0.00383999	0.281	12/17	22.91%	MVD;IDI1;EBP;HMGCS1;DHCR24;MSMO1;FDPS;SQLE;DHCR7;HMGCR;CYP51A1;SC5D	Astro
1028	WikiPathway_2023_Human__Glycolysis And Gluconeogenesis WP534	-0.417466	-2.26715	0	0.00392101	0.287	27/39	32.27%	TPI1;PGAM2;GAPDH;ALDOB;ENO2;LDHB;ALDOC;HK2;SLC2A3;GCK;LDHA;PFKP;PGAM1;ALDOA;GOT1;MDH2;MPC2;SLC2A5;ENO3;PKM;PGK1;ENO1;PFKL;MDH1;GPI;PDHA1;SLC2A1	Astro
1029	WikiPathway_2023_Human__Complement Activation WP545	0.499866	2.26505	0.0027248	0.0287782	0.398	10/17	13.06%	C4B;C7;C4A;C6;C3;C1QC;CFP;C1R;C2;CD55	Astro
1030	KEGG_2021_Human__Calcium signaling pathway	-0.27466	-2.26436	0	0.00401119	0.294	97/206	27.86%	SLC25A5;CCKBR;NGF;CALM3;CAMK1;CHRM1;MET;PLCB2;CXCR4;CAMK1G;HTR2A;HTR6;GRIN1;SLC25A4;P2RX5;FGF20;HTR5A;HRH2;SLC8A3;PRKCG;GNA15;CACNA1H;ORAI3;GDNF;SLC8A2;PLCB4;MCOLN3;CACNA1S;FGF8;DRD1;MST1;EDNRB;CASQ1;PDGFB;HTR2B;FGFR4;PDE1A;TACR2;CACNA1G;PLN;PTGER3;SLC8A1;HTR4;VEGFA;NTSR1;LTB4R2;CHRM2;VEGFB;ATP2B3;FGF9;ADRA1B;PPIF;CYSLTR1;PRKCB;P2RX6;CALML4;PDGFRA;P2RX1;PTAFR;FGF7;FGFR3;MST1R;PDE1C;ERBB3;GRIN2A;I…	Astro
1031	GO_Cellular_Component_2023__Exocytic Vesicle Membrane (GO:0099501)	-0.395226	-2.25038	0	0.00455866	0.332	33/49	35.34%	SYNGR3;SYT5;SLC32A1;OTOF;SLC17A7;SYT4;SLC17A6;SLC17A8;SYT1;SV2B;RAB26;SYN1;RPH3A;SYNDIG1;VAMP2;SYNPR;SEMA4C;SYP;SV2A;SYT2;RAB3B;SYN2;SV2C;MCTP1;TMEM163;UNC13C;CLTB;SYPL2;SYNGR2;GABRA2;UNC13A;SYNGR1;SYN3	Astro
1032	GO_Molecular_Function_2023__Endopeptidase Regulator Activity (GO:0061135)	-0.457621	-2.24835	0.0015625	0.00459854	0.337	17/31	20.70%	PCSK1N;SPINK2;CST3;SPINT2;PSENEN;SERPIND1;ADRM1;APH1A;THBS1;CSTB;SERPINF2;ITIH4;ITIH2;PSME1;WFDC2;PZP;RENBP	Astro
1033	GO_Biological_Process_2023__Positive Regulation Of Neural Precursor Cell Proliferation (GO:2000179)	-0.476599	-2.2432	0	0.00475279	0.347	15/27	18.09%	CX3CR1;VCAN;DISP3;HAPLN1;DLL4;BCAN;LRP2;HAPLN3;FZD9;PROX1;VEGFA;HAPLN2;NCAN;DRD2;CX3CL1	Astro
1034	WikiPathway_2023_Human__Lipid Metabolism In Senescent Cells WP5149	-0.57951	-2.23848	0	0.0049663	0.362	11/16	18.88%	PLA2G3;HRAS;PTGS2;PLA2G7;PLA2G4E;PLA2G5;CDKN1A;PLA2G4A;PLA2G10;SLCO2A1;ALOX5	Astro
1035	GO_Biological_Process_2023__Regulation Of Neuronal Synaptic Plasticity (GO:0048168)	-0.436713	-2.23824	0	0.00494981	0.365	23/34	31.48%	RAB3A;APOE;SHISA8;GRIN1;SLC8A2;SYP;GRIN2B;SHISA7;NETO1;NCDN;DRD2;GRIN2A;SLC4A10;NSMF;MCTP1;CAMK2A;SHISA9;GRIN2D;GRIN2C;PPFIA3;GRIK2;APP;DBN1	Astro
1036	GO_Biological_Process_2023__Regulation Of Postsynaptic Membrane Potential (GO:0060078)	-0.437594	-2.23568	0	0.00508621	0.375	23/33	32.21%	GABRA1;GRID2;GABRG2;GABRA5;GRIN1;INSYN2B;NPFF;CHRNA4;GABRA4;GRIN2B;MAPK8IP2;GSK3A;DRD2;GRIN2A;GABRG3;GLRA1;INSYN1;ARRB2;GRIN2D;GRIN2C;DRD4;GABRA2;NLGN3	Astro
1037	GO_Biological_Process_2023__G Protein-Coupled Receptor Signaling Pathway, Coupled To Cyclic Nucleotide Second Messenger (GO:0007187)	-0.412837	-2.23447	0	0.00512937	0.38	26/40	26.91%	NPY;CHRM1;HTR2A;HRH3;HTR6;CNR1;VIPR1;HTR5A;HRH2;PTGIR;NPY1R;DRD1;HTR2B;HTR4;CHRM2;GALR3;HTR1F;CALCRL;OPRM1;CHRM3;CNR2;OPRD1;TSHR;AGT;XCR1;DRD4	Astro
1038	GO_Molecular_Function_2023__Neuropeptide Binding (GO:0042923)	-0.571354	-2.23376	0	0.00512182	0.382	12/15	25.20%	OPRK1;SSTR3;MCHR1;SSTR1;SSTR2;NPY1R;NPY5R;OPRM1;GPR171;OPRD1;OPRL1;GPR37	Astro
1039	GO_Biological_Process_2023__Detection Of Chemical Stimulus Involved In Sensory Perception Of Taste (GO:0050912)	0.466064	2.23313	0.00277778	0.0349783	0.481	12/19	18.11%	TAS2R50;RTP4;PKD2L1;TAS2R46;LPO;GNAT2;TAS2R43;TAS2R14;TAS2R5;TAS2R3;TAS2R31;TAS2R30	Astro
1040	GO_Biological_Process_2023__Synaptic Vesicle Exocytosis (GO:0016079)	-0.421238	-2.23258	0	0.00513418	0.386	28/38	36.69%	SYT5;RAB3A;CDK5;CPLX1;OTOF;SYT4;SYT1;STX1A;SNAP25;CPLX2;SYT7;VAMP2;SNCA;RIMS3;SYT2;STX1B;DOC2B;SNAPIN;SYT10;UNC13C;DNAJC5;RIMS2;STX19;RIMS1;SYT11;UNC13A;SNPH;PIP5K1C	Astro
1041	GO_Molecular_Function_2023__Active Monoatomic Ion Transmembrane Transporter Activity (GO:0022853)	-0.514204	-2.23166	0.00309598	0.00514632	0.391	10/20	8.54%	COX8A;COX7A1;UQCR10;COX4I1;COX7C;COX5B;UQCRH;COX6B1;UQCRB;COX5A	Astro
1042	GO_Biological_Process_2023__Positive Regulation Of Cell Junction Assembly (GO:1901890)	-0.376981	-2.23108	0	0.0051291	0.393	29/54	25.45%	THY1;GRID2;SLITRK1;WNT7A;BDNF;SFRP1;SLITRK4;SLITRK5;EPHB3;SLITRK3;SYNDIG1;CAV1;VEGFA;EPHA2;S100A10;NELL1;GHRL;PTPRD;CLDN5;CLSTN3;NLGN1;LRRC4B;IL1RAPL1;CLSTN2;COL16A1;CNTNAP2;ACE2;AGT;NRG1	Astro
1043	GO_Biological_Process_2023__Regulation Of Monoatomic Ion Transmembrane Transport (GO:0034765)	-0.474875	-2.22519	0	0.0054299	0.407	17/25	29.75%	KCNJ14;KCNJ4;KCNJ5;GRIN1;KCNJ16;KCNJ12;KCNJ9;GRIN2B;KCNJ6;GRIN2A;KCNJ13;KCNJ8;P2RX7;GRIN2D;GRIN2C;KCNJ10;KCNJ3	Astro
1044	GO_Molecular_Function_2023__Transmitter-Gated Monoatomic Ion Channel Activity (GO:0022824)	-0.429912	-2.2251	0	0.00539139	0.408	25/36	31.73%	GABRA1;GRID2;GABRG2;GABRA5;GRIN3A;GRIK3;GLRA2;GABRB2;GRIA1;GRIA3;CHRND;GABRA4;GRIN2B;GLRA3;GRIA4;GRIN2A;GABRG3;HTR3B;GRIK1;GRIN2D;GRIN2C;CHRNE;GRIK2;CHRNB1;GABRA2	Astro
1045	GO_Biological_Process_2023__Regulation Of Transmembrane Transport (GO:0034762)	-0.456232	-2.22274	0	0.00547651	0.414	15/27	18.90%	CLTRN;KCNJ14;KCNJ4;KCNJ5;KCNJ16;KCNJ12;KCNJ9;ACTB;SNCA;FFAR4;PRKCB;KCNJ6;KCNJ13;PIM1;TRIB3	Astro
1046	GO_Biological_Process_2023__Detection Of Chemical Stimulus Involved In Sensory Perception Of Bitter Taste (GO:0001580)	0.483576	2.22117	0.00273224	0.0340023	0.518	11/17	18.11%	TAS2R50;RTP4;TAS2R46;LPO;GNAT2;TAS2R43;TAS2R14;TAS2R5;TAS2R3;TAS2R31;TAS2R30	Astro
1047	GO_Biological_Process_2023__Sensory Perception Of Bitter Taste (GO:0050913)	0.483576	2.22117	0.00273224	0.0340023	0.518	11/17	18.11%	TAS2R50;RTP4;TAS2R46;LPO;GNAT2;TAS2R43;TAS2R14;TAS2R5;TAS2R3;TAS2R31;TAS2R30	Astro
1048	GO_Biological_Process_2023__Positive Regulation Of Phagocytosis (GO:0050766)	0.358804	2.21929	0	0.0331037	0.527	16/42	9.77%	C4B;C4A;CCL2;FCN2;PLCG2;COLEC10;F2RL1;C3;PTPRC;IL15RA;TUB;CFP;IL15;NCKAP1L;COLEC11;SIRPB1	Astro
1049	GO_Biological_Process_2023__Regulation Of Synaptic Transmission, Glutamatergic (GO:0051966)	-0.373886	-2.21872	0	0.00571956	0.427	36/52	37.63%	CDK5;GRIN1;GRM2;SYT1;GRIK3;CACNG3;PLPPR4;DRD1;CACNG8;GRM4;DGKZ;GRIN2B;MAPK8IP2;GRM3;DRD2;CACNG5;GRIN2A;GRIK1;TPRG1L;RELN;GRM5;NLGN1;HCN1;SLC38A2;GRIN2D;GRIN2C;RNF167;CACNG2;GRM8;GRM6;DGKI;NLGN3;CACNG7;UNC13A;ATP1A2;GRM1	Astro
1050	KEGG_2021_Human__Protein digestion and absorption	0.281087	2.21703	0	0.0322103	0.534	36/84	17.10%	CPA2;COL21A1;KCNK5;COL8A1;XPNPEP2;COL4A6;COL15A1;SLC15A1;COL1A2;COL13A1;COL4A4;COL20A1;COL6A5;CPB2;KCNE3;SLC16A10;SLC1A5;SLC36A2;COL8A2;COL1A1;CPB1;COL14A1;COL22A1;KCNQ1;COL6A2;COL9A1;SLC7A7;COL24A1;SLC7A8;ATP1A4;COL4A3;COL26A1;COL4A1;COL23A1;COL27A1;COL5A1	Astro
1051	GO_Biological_Process_2023__Regulation Of T Cell Receptor Signaling Pathway (GO:0050856)	-0.45266	-2.21376	0	0.0059863	0.444	22/30	35.11%	THY1;PHPT1;TESPA1;CD300A;LCK;LILRB4;DGKZ;LAPTM5;GBP1;CD160;KCNN4;IKBKG;PTPN22;CD81;PRNP;SLA2;RAB29;EZR;CEACAM1;RELA;PRKD2;RPS3	Astro
1052	GO_Biological_Process_2023__External Encapsulating Structure Organization (GO:0045229)	0.26797	2.20876	0	0.0329662	0.558	35/91	15.38%	MMP20;ADAMTS12;SPINT1;MATN1;SMOC1;ADAMTS20;COL8A1;MMP2;MATN3;COL4A6;COL15A1;COL1A2;COL13A1;ADAMTS14;SMOC2;ADAMTS6;TGFBI;ADAMTS15;COL8A2;COL1A1;MANSC4;ECM2;MATN2;COL14A1;ADAMTSL4;ADAMTS1;COL22A1;THSD4;COL9A1;HRNR;COL24A1;COL4A3;ADAMTS3;COL4A1;COL23A1	Astro
1053	GO_Biological_Process_2023__Regulation Of Mitochondrial Outer Membrane Permeabilization Involved In Apoptotic Signaling Pathway (GO:1901028)	-0.553507	-2.20845	0.00161031	0.00619318	0.457	13/16	32.25%	SLC25A5;HSPA1A;SLC25A4;CHCHD10;FZD9;GSK3A;SLC25A31;BOK;ZNF205;HIP1R;SLC35F6;TMEM14A;MPV17L	Astro
1054	WikiPathway_2023_Human__5Q35 Copy Number Variation WP5380	-0.312268	-2.20702	0	0.00626863	0.462	36/99	20.08%	COX8A;COX7A1;SNCB;PRELID1;COX6A1;COX4I1;COX7C;COX5B;HIGD2A;CXCR4;COX6B1;GRIN1;PRR7;RGS14;JUN;F12;COX6C;MYC;BABAM1;COX5A;FGFR4;TRIAP1;MYO7B;TMED9;DOK3;UNC5A;SNCA;GRIN2B;EIF4E1B;COX7B;DDX41;NOP16;DRD2;GPRIN1;INPP5D;H2AX	Astro
1055	GO_Cellular_Component_2023__Dendrite (GO:0030425)	-0.260014	-2.2054	0	0.00639717	0.474	111/258	29.13%	THY1;CRHBP;SLC32A1;CDK5;APOE;PLK2;RPL28;GABRA1;GCHFR;CHRM1;ELFN1;GABRG2;HTR2A;HRH3;GABRA5;HTR6;LAMP5;GRIN1;NSG2;PNOC;GRIK3;HTR5A;HRH2;EPHB6;SLC8A3;RGS14;PRKCG;HSPA8;CALB1;KCNA1;KLHL1;CDK5R1;LRP2;NSG1;SLC8A2;EPHA5;MME;ELAVL4;ATCAY;HTR2B;EPHB3;NEURL1;EPHA3;GRIA1;KCNC2;HOMER3;HCN2;SLC8A1;SLC6A6;HTR4;NPFF;RGS8;APOD;SRCIN1;SLC4A8;CHRM2;HTR1F;EPHA10;CHRNA4;OPRM1;RPS6;GABRA4;SPACDR;ANK3;CALB2;SORBS2;MAP…	Astro
1056	GO_Biological_Process_2023__Epithelial Cilium Movement Involved In Extracellular Fluid Movement (GO:0003351)	0.491767	2.2046	0	0.0325733	0.568	11/18	19.87%	SPAG6;ROPN1L;SPAG17;CCDC39;NEK10;CFAP53;DNAAF1;SPA17;CABYR;ODAD4;OFD1	Astro
1057	GO_Biological_Process_2023__Neuron Projection Development (GO:0031175)	-0.276429	-2.20292	0	0.00651459	0.48	79/177	30.77%	NPY;BLOC1S1;STMN2;STMN1;NEUROD6;CDK5;BHLHE22;APOE;NGF;PLP1;NEUROD2;RASGRF1;STMN4;OLIG1;UBB;ATOH7;GPRIN3;NEFH;WNT7A;L1CAM;DCLK1;OMG;BDNF;PACSIN1;GDNF;CDK5R1;MNX1;NBL1;VASH2;ZNF365;ATCAY;OLIG2;GPRIN2;EPHB3;MGARP;TUNAR;BLOC1S3;EPB41L3;UNC5A;PQBP1;NRTN;PRMT1;FLRT3;DOCK10;SH3GL2;PAK3;SGK1;MAP1B;NYAP2;STMN3;NCDN;MANF;GPRIN1;SNAPIN;NLGN1;SHANK1;CNTNAP1;BLOC1S4;AGER;LAMB1;GBA1;POU4F1;CNTNAP2;NMNAT2;EHD1;…	Astro
1058	GO_Biological_Process_2023__Potassium Ion Transmembrane Transport (GO:0071805)	-0.299696	-2.20117	0	0.00661225	0.49	61/119	27.71%	KCNF1;ATP1A3;KCNE5;KCNK1;KCNJ14;KCNK9;KCNK3;KCNJ4;KCNV1;KCNJ5;KCND2;ATP1B1;KCNA3;KCNJ16;KCNJ12;KCNK7;KCNA1;KCNA4;KCNK2;KCNJ9;KCNS2;SLC12A5;KCNG1;KCNE4;SLC24A2;KCNS1;KCNH6;CCDC51;KCNA7;KCNH3;LRRC52;KCNC2;ATP1A1;KCNH4;SLC9A2;HCN2;KCNK12;KCNA6;KCNV2;KCNH8;SLC24A4;KCNN4;KCNE2;KCNJ6;LRRC38;SLC12A1;KCNJ13;KCNG2;ATP1B2;HCN1;KCND1;SLC9A3;KCNJ8;KCNQ5;KCNH5;KCNH1;KCNH7;KCNQ2;KCNJ10;KCNB1;KCNC1	Astro
1059	GO_Biological_Process_2023__Excitatory Postsynaptic Potential (GO:0060079)	-0.545649	-2.19193	0	0.00717673	0.516	11/16	26.09%	GRID2;GRIN1;NPFF;GRIN2B;MAPK8IP2;GSK3A;DRD2;GRIN2A;ARRB2;GRIN2D;GRIN2C	Astro
1060	GO_Cellular_Component_2023__Lysosomal Lumen (GO:0043202)	-0.335545	-2.18752	0	0.00744274	0.532	49/78	36.34%	CSPG5;VCAN;GPC6;BCAN;HPSE;HSPA8;SERPINB13;ARSA;DCN;BGN;NEU1;NAGLU;SMPD1;PPT2;OGN;CTSD;CD74;NCAN;CEL;SDC3;NEU4;CTSF;GAA;OMD;PSAP;GBA1;HYAL1;HSP90AA1;CTSL;GM2A;CTSS;AGRN;GPC1;NPC2;TCN2;ATP13A2;GLA;ASAH1;SDC4;PLD3;CTSV;CHID1;PPT1;IDS;CTSA;TPP1;CTSB;IDUA;GALNS	Astro
1061	GO_Biological_Process_2023__Positive Regulation Of Interleukin-1 Production (GO:0032732)	0.338073	2.18715	0.00321543	0.0353388	0.612	21/47	15.80%	NLRP10;PYHIN1;IFI16;F2RL1;MNDA;TYROBP;NLRP12;NOD2;CD36;NLRP3;MEFV;LCP1;IL16;FZD5;LGALS9;INAVA;PANX1;NLRP1;RIPK2;AIM2;NLRC4	Astro
1062	GO_Biological_Process_2023__Regulation Of Synapse Assembly (GO:0051963)	-0.389126	-2.18678	0	0.0074262	0.533	25/48	21.84%	GRID2;SLITRK1;WNT7A;CHRNB2;BDNF;LRFN4;SLITRK4;SLITRK5;EPHB3;SLITRK3;SYNDIG1;SNCA;SLIT1;ROBO2;GHRL;PTPRD;CLSTN3;IL1RAPL2;LRRTM3;NLGN1;LRFN5;MUSK;LRRC4B;IL1RAPL1;CLSTN2	Astro
1063	GO_Cellular_Component_2023__Postsynaptic Density Membrane (GO:0098839)	-0.435687	-2.18391	0	0.00758245	0.542	24/33	37.88%	GRID2;GRIN3A;GRIK3;CACNG3;PLPPR4;CACNG8;SYNDIG1;GRIA1;GRIA3;GRIN2B;NETO1;GRIA4;CACNG5;GRIN2A;DAGLA;GRIK1;GRM5;GRIN2D;GRIN2C;CACNG2;GRIK2;CACNG7;GRM1;DLG4	Astro
1064	GO_Biological_Process_2023__Sodium Ion Transmembrane Transport (GO:0035725)	-0.343569	-2.18154	0	0.00771054	0.546	33/68	21.71%	ATP1A3;SCN3B;KCNK1;SCN4B;ATP1B1;ASIC1;SLC6A17;SLC6A20;SLC8A3;SLC8A2;SCN2A;SLC6A7;SLC6A15;SLC24A2;SCN9A;SCN5A;ATP1A1;SLC9A2;HCN2;SCNN1B;SLC8A1;SLC6A6;ASIC3;SLC4A8;SLC24A4;SCN2B;SLC12A1;SCN1B;SLC6A9;SLC6A4;ATP1B2;HCN1;SLC9A3	Astro
1065	WikiPathway_2023_Human__Sleep Regulation WP3591	-0.456855	-2.17139	0.00153374	0.00837151	0.573	15/27	19.63%	CRH;CST3;FOS;NPY2R;HTR2A;CHRNB2;STAR;UTS2;PTGDS;DRD1;IL18;GHRL;DRD2;GRIN2A;NLGN1	Astro
1066	GO_Biological_Process_2023__Glutamate Receptor Signaling Pathway (GO:0007215)	-0.420838	-2.16971	0	0.00839034	0.577	21/34	30.14%	GRID2;GRIN1;GRM2;GRIN3A;GRIK3;CDK5R1;GRM4;GRIA3;HOMER3;GRIN2B;GRM3;GRIA4;GRIN2A;GRIK1;GRM5;GRIN2D;GRIN2C;KCNB1;GRM8;GRM6;GRIK2	Astro
1067	GO_Biological_Process_2023__Neurotransmitter Transport (GO:0006836)	-0.385166	-2.16675	0	0.00857606	0.586	33/45	39.23%	SLC32A1;SLC17A7;SLC17A6;HRH3;SLC38A1;SLC1A6;SLC17A8;SYT1;SYN1;SLC6A15;GRM4;SNAP25;LIN7B;SLC29A4;SLC28A2;SNAPIN;SLC6A4;SYN2;SLC38A2;PPFIA3;PDZD11;SLC1A1;GABRA2;NRXN2;SLC29A2;UNC13A;DVL1;SYN3;SNPH;SLC1A2;SLC22A1;BRSK1;LIN7C	Astro
1068	MSigDB_Hallmark_2020__Angiogenesis	-0.454575	-2.16621	0	0.00859304	0.589	19/28	32.19%	VCAN;OLR1;POSTN;SPP1;S100A4;VTN;TNFRSF21;VEGFA;TIMP1;PGLYRP1;CCND2;SLCO2A1;JAG2;LPL;KCNJ8;LRPAP1;JAG1;APP;MSX1	Astro
1069	MSigDB_Hallmark_2020__Myc Targets V2	-0.356426	-2.16498	0	0.00858506	0.592	39/57	39.65%	DUSP2;DCTPP1;MYC;HSPE1;HK2;IPO4;TMEM97;RRP9;IMP4;EXOSC5;NOP16;PPAN;NOC4L;MRTO4;GRWD1;SRM;PA2G4;NOP2;MCM4;BYSL;HSPD1;NDUFAF4;NOP56;FARSA;WDR74;MYBBP1A;SLC29A2;CDK4;PES1;GNL3;NIP7;PPRC1;TBRG4;SLC19A1;AIMP2;PLK1;RRP12;TCOF1;CBX3	Astro
1070	WikiPathway_2023_Human__Cholesterol Metabolism With Bloch And Kandutsch Russell Pathways WP4718	-0.386918	-2.16179	0	0.00883044	0.604	35/44	46.72%	CH25H;MVD;SCD;IDI1;EBP;HMGCS1;DHCR24;MSMO1;TM7SF2;FDPS;SQLE;DHCR7;ABCG1;FASN;HMGCR;CYP51A1;ACOT2;SC5D;ACAT2;SREBF1;ELOVL4;HSD17B7;FADS2;PMVK;FADS1;NSDHL;ELOVL5;NR1H2;SREBF2;FDFT1;CYP46A1;NR1H3;MVK;GGPS1;LSS	Astro
1071	GO_Biological_Process_2023__Inorganic Cation Transmembrane Transport (GO:0098662)	-0.253254	-2.16071	0	0.00883701	0.608	110/247	27.21%	KCNF1;SLC39A4;ATP1A3;AQP8;SLC30A3;ATP6V1F;SCN3B;KCNK1;ATP5MF;ATP5PO;SCN4B;KCNK9;KCNK3;KCNV1;KCND2;ATP6V0B;ATP1B1;KCNA3;ASIC1;SLC6A17;SLC6A20;SLC8A3;SLC39A3;KCNK7;ATP5F1B;KCNA1;CACNA1H;KCNA4;RHBG;RHAG;SLC8A2;ATP6AP1;SCN2A;KCNK2;SLC6A7;KCNS2;KCNG1;MCOLN3;SLC39A1;CACNA1S;SLC6A15;SLC24A2;KCNS1;KCNH6;SCN9A;CCDC51;SCN5A;SLC24A5;KCNA7;KCNH3;LRRC52;KCNC2;CACNA1G;ATP1A1;KCNH4;SLC9A2;HCN2;SCNN1B;SLC8A1;ATP…	Astro
1072	GO_Biological_Process_2023__Modulation Of Chemical Synaptic Transmission (GO:0050804)	-0.30224	-2.16048	0	0.00878715	0.609	47/115	21.95%	CNTNAP4;CDK5;CPLX1;OTOF;NPTX2;CX3CR1;GRID2;NPTX1;GRM2;SLC38A1;SYT1;GRIN3A;GRIK3;CHRNB2;SLC8A3;PLPPR4;SLC8A2;KCNMB4;SYN1;GRM4;CPLX2;NMU;GRIA1;GRIA3;DGKZ;SLC4A8;HCRT;BAIAP3;RIMS3;MAPK8IP2;GRM3;DRD2;GRIA4;CACNG5;CLSTN3;LRRC4;GRIK1;SLC6A9;TPRG1L;RELN;GRM5;NLGN1;NPTXR;MCTP1;NLGN4Y;CLSTN2;CAMK2A	Astro
1073	GO_Biological_Process_2023__Extracellular Structure Organization (GO:0043062)	0.263012	2.15974	0	0.0417067	0.676	37/91	17.79%	MMP20;ADAMTS12;SPINT1;MATN1;SMOC1;ADAMTS20;COL8A1;MMP2;MATN3;COL4A6;COL15A1;COL1A2;COL13A1;ADAMTS14;SMOC2;ADAMTS6;TGFBI;ADAMTS15;COL8A2;COL1A1;MANSC4;ECM2;MATN2;COL14A1;ADAMTSL4;ADAMTS1;COL22A1;THSD4;COL9A1;COL24A1;COL4A3;ADAMTS3;COL4A1;COL23A1;TEX14;COL5A1;ADAMTS10	Astro
1074	GO_Biological_Process_2023__Monoatomic Cation Transmembrane Transport (GO:0098655)	-0.254491	-2.15964	0	0.00880194	0.61	111/248	27.21%	KCNF1;SLC39A4;ATP1A3;SLC30A3;ATP6V1F;SCN3B;KCNK1;ATP5MF;ATP5PO;SCN4B;KCNK9;KCNK3;KCNV1;KCND2;GRIN1;ATP6V0B;ATP1B1;KCNA3;ASIC1;SLC6A17;SLC6A20;SLC8A3;SLC39A3;KCNK7;ATP5F1B;KCNA1;KCNA4;SLC8A2;ATP6AP1;SCN2A;KCNK2;SLC6A7;KCNS2;KCNG1;MCOLN3;SLC39A1;CNGB1;CACNA1S;SLC6A15;SLC24A2;KCNS1;KCNH6;SCN9A;CCDC51;SCN5A;SLC24A5;KCNA7;KCNH3;LRRC52;KCNC2;CACNA1G;ATP1A1;KCNH4;SLC9A2;HCN2;SCNN1B;SLC8A1;ATP6V0C;KCNK12…	Astro
1075	GO_Biological_Process_2023__Potassium Ion Transport (GO:0006813)	-0.301735	-2.15793	0	0.00884822	0.616	57/111	27.71%	KCNF1;KCNK1;SLC17A7;KCNMB2;KCNK9;KCNK3;KCNJ4;KCNV1;KCNJ5;KCND2;KCNA3;KCNJ16;KCNJ12;KCNK7;KCNA1;KCNA4;KCNMB4;KCNK2;KCNS2;KCNG1;SLC24A2;KCNS1;KCNH6;CCDC51;KCNA7;KCNH3;LRRC52;KCNC2;KCNH4;SLC9A2;HCN2;KCNAB3;KCNK12;KCNA6;KCNV2;KCNH8;SLC24A4;KCNN4;KCNE2;KCNJ6;LRRC38;KCNAB1;KCNMB1;KCNJ13;KCNG2;HCN1;KCND1;SLC9A3;KCNJ8;KCNQ5;KCNH5;KCNH1;KCNH7;KCNQ2;KCNJ10;KCNB1;KCNC1	Astro
1076	GO_Biological_Process_2023__Vesicle-Mediated Transport In Synapse (GO:0099003)	-0.555711	-2.15464	0	0.00909846	0.625	15/16	37.83%	RAB3A;CDK5;CPLX1;OTOF;STX1A;SNAP25;CPLX2;VAMP2;SNCA;SNAPIN;SYT10;DNAJC5;RIMS1;PIP5K1C;BRSK1	Astro
1077	GO_Biological_Process_2023__Axonogenesis (GO:0007409)	-0.266939	-2.14868	0	0.00947009	0.646	83/179	31.40%	CCK;RAB3A;CDK5;EFNA3;LRTM2;APLP1;SLITRK1;S100A6;EFNB3;NEFH;WNT7A;SSNA1;SEMA5A;LGR6;L1CAM;EPHB6;DSCAML1;BDNF;PLPPR4;CDK5R1;IGSF9;EPHA5;SEMA7A;SLITRK4;SLITRK5;EPHB3;SLITRK3;EPHA3;CNTN2;SEMA3F;SEMA4C;EMB;NTNG1;SLIT1;TRIM46;EPHA10;HSP90AB1;LRTM1;PAK3;NELL1;EFNA4;ANK3;NOTCH3;ROBO2;PLA2G10;MAP1B;DRD2;SLIT2;SCN1B;SEMA5B;RELN;SEMA3E;SEMA6B;DSCAM;PLEKHG4;CXCL12;NRXN3;SEMA6A;DCC;MAP1A;DRAXIN;WNT5A;POU4F1;L…	Astro
1078	GO_Biological_Process_2023__Negative Regulation Of Actin Filament Polymerization (GO:0030837)	-0.490145	-2.14539	0.00158479	0.00965019	0.658	15/22	29.66%	TMSB10;TMSB4Y;TMSB4X;PFN2;PFN1;KANK4;SCIN;TWF2;VIL1;SLIT2;MYADM;PFN4;KANK3;HIP1R;SSH3	Astro
1079	GO_Biological_Process_2023__Ribosome Assembly (GO:0042255)	-0.383327	-2.14451	0	0.00968139	0.663	29/45	35.39%	RPS15;RPS28;RPS27;RPS14;RPL10;RPS5;RPL11;MRPS2;MRPS7;RPL23A;RPL5;EIF6;ERAL1;PPAN;MPV17L2;TRAF7;RPS19;RRS1;NOP2;MRPL20;C1QBP;RPSA;RPL6;NOP53;RPLP0;NGRN;RRP7A;SBDS;BRIX1	Astro
1080	WikiPathway_2023_Human__Prostaglandin And Leukotriene Metabolism In Senescence WP5122	-0.447481	-2.14393	0	0.00970449	0.668	15/28	19.95%	HRAS;PTGS2;CDKN1A;PTGDS;IGFBP5;ALOX15B;ALOX12;ALOX5AP;PTGER3;ALOX15;PLA2G4A;CYSLTR1;PTGIS;ALOX5;LTC4S	Astro
1081	GO_Biological_Process_2023__Mitochondrial Gene Expression (GO:0140053)	-0.307496	-2.13851	0	0.010107	0.685	67/103	44.54%	MRPL55;GADD45GIP1;MRPL51;MRPL17;MRPL12;MRPL54;MRPL36;MRPS34;MRPL40;NDUFA7;MRPL28;MRPS17;MRPL41;MRPL23;MRPL34;MRPS2;MRPL53;MRPS7;MRPS26;MRPS12;CHCHD1;MRPL2;MRPL27;MRPL38;MRPL21;MRPL9;MRPL49;MRPL58;TWNK;FASTK;MRPL52;POLRMT;MRPL57;MRPL20;MRPL14;MRPL24;MRPL10;MRPS28;MRPL11;MRPS33;MRPL16;MRPL4;MRPL50;MTG1;MRPL43;MRPS15;TBRG4;MRPS16;MRPL35;MRPS21;MRPS18B;MRPS6;MRPL18;GATC;MRPS23;MRPS11;MRPL44;MRPS30;MR…	Astro
1082	MSigDB_Hallmark_2020__Epithelial Mesenchymal Transition	-0.264975	-2.13721	0	0.0101268	0.688	98/181	33.26%	ANPEP;THY1;RGS4;TNC;ID2;APLP1;LGALS1;IGFBP2;VCAN;GADD45B;VCAM1;BASP1;CCN1;POSTN;SPP1;SCG2;THBS2;COL5A3;GREM1;PCOLCE2;DKK1;PFN2;BDNF;JUN;SFRP1;MGP;ENO2;ECM1;THBS1;DCN;FZD8;BGN;ITGA2;MMP14;CDH6;COL12A1;IGFBP3;VEGFA;GLIPR1;GADD45A;ABI3BP;SFRP4;FBLN2;MAGEE1;RHOB;TIMP1;EDIL3;COL7A1;INHBA;CCN2;NT5E;SERPINH1;ELN;SPARC;COL6A3;MFAP5;FSTL3;PTHLH;CTHRC1;GAS1;SLIT2;PMEPA1;SGCG;PCOLCE;CXCL12;TAGLN;PPIB;GEM;CO…	Astro
1083	MSigDB_Hallmark_2020__Inflammatory Response	0.221864	2.13643	0	0.0475095	0.733	58/164	17.02%	ICAM1;IL1R1;TLR2;APLNR;ITGA5;LTA;CCL2;SPHK1;IFITM1;TNFRSF1B;OSMR;STAB1;ADGRE1;ROS1;CYBB;C5AR1;SERPINE1;KCNJ2;NOD2;P2RY2;GP1BA;TNFRSF9;MSR1;EBI3;TACR3;TACR1;IL18R1;NLRP3;IL15RA;LAMP3;SELL;MEFV;RTP4;IL15;PDPN;ITGB3;LPAR1;TNFSF10;GPR132;FZD5;GPC3;NMI;CD55;BTG2;TLR3;HPN;RIPK2;BEST1;SGMS2;HBEGF;CD40;SLC31A2;CSF1;PLAUR;IRAK2;PVR;PTPRE;NAMPT	Astro
1084	GO_Biological_Process_2023__Mitochondrial Translation (GO:0032543)	-0.309801	-2.13329	0	0.0103859	0.703	64/98	44.97%	MRPL55;GADD45GIP1;MRPL51;MRPL17;MRPL12;MRPL54;MRPL36;MRPS34;MRPL40;NDUFA7;MRPL28;MRPS17;MRPL41;MRPL23;MRPL34;MRPS2;TUFM;MRPL53;MRPS7;MRPS26;MRPS12;CHCHD1;MRPL2;MRPL27;MRPL38;MRPL21;MRPL9;MRPL49;MRPL58;MRPL52;MRPL57;MRPL20;MRPL14;MRPL24;MRPL10;MRPS28;MRPL11;MRPS33;MRPL16;MRPL4;MRPL50;MTG1;MRPL43;MRPS15;MRPS16;MRPL35;MRPS21;MRPS18B;MRPS6;MRPL18;GATC;MRPS23;MRPS11;MRPL44;MRPS30;MRPL37;MRPL30;MRPL47;…	Astro
1085	WikiPathway_2023_Human__Hematopoietic Stem Cell Gene Regulation By GABP Alpha Beta Complex WP3657	0.443993	2.12906	0	0.0486347	0.751	17/19	42.92%	FLT3;MCL1;DNMT3B;DNMT3A;BCL2;FOXO3;BCL2L1;ETV6;GABPB1;TERF2;GABPA;ZFX;PTEN;EP300;CREBBP;ATM;SMAD4	Astro
1086	GO_Biological_Process_2023__Positive Regulation Of Interleukin-1 Beta Production (GO:0032731)	0.336478	2.12765	0	0.0474215	0.755	19/42	15.80%	PYHIN1;IFI16;F2RL1;MNDA;TYROBP;NLRP12;NOD2;CD36;NLRP3;MEFV;LCP1;FZD5;LGALS9;INAVA;PANX1;NLRP1;RIPK2;AIM2;NLRC4	Astro
1087	KEGG_2021_Human__Spliceosome	-0.284533	-2.12332	0	0.0112066	0.728	107/131	57.71%	SNRPD2;HSPA1A;HSPA6;HSPA1B;HSPA8;SF3B5;ALYREF;LSM4;PCBP1;SRSF2;PQBP1;EIF4A3;U2AF1L4;LSM7;HSPA1L;PUF60;SNRPB;LSM3;SNU13;HSPA2;LSM2;THOC3;PHF5A;SRSF7;RBM8A;SRSF8;SF3B4;ZMAT2;SRSF3;SF3B6;BCAS2;SRSF9;SF3A1;PRPF19;PRPF31;LSM5;SNRNP70;ISY1;HNRNPA1;NCBP2;XAB2;SNRPE;DHX38;FUS;BUD31;PLRG1;CWC15;RP9;RBM22;SRSF5;SYF2;SNRPA;U2AF2;SF3B2;CHERP;SNRPD3;SNRNP27;SNRPB2;HNRNPK;WBP11;SLU7;DHX16;SNRPG;SRSF6;SF3A2;SRS…	Astro
1088	GO_Biological_Process_2023__Negative Regulation Of Growth (GO:0045926)	-0.297514	-2.12108	0	0.0113588	0.734	71/109	43.88%	NDUFA13;NDUFS3;MT3;CCDC85B;CDKN2D;WFDC1;SFRP2;CCN3;HSPA1A;SERTAD3;HSPA1B;CDKN1A;SFRP1;ALOX15B;ACVRL1;CDA;DACT3;MT1A;HYAL2;MT2A;SLIT1;MT1M;BST2;INHBA;FGFR3;SIPA1;GNG4;SLIT2;PHB1;MT1G;MINAR1;MT1E;RACK1;MT1X;PSRC1;FRZB;HYAL1;OSGIN2;NRG1;DNAJB2;ENO1;TP53TG5;PPP2R1A;PPP1R9B;BTG1;EI24;MT1F;TSPYL2;PPP2CA;FLCN;GJA1;RERG;MSX1;DCUN1D3;PPT1;NAIF1;ADAM15;ESR2;STK11;MUL1;TGFB1;CGRRF1;TP53;NDRG3;TCHP;ING4;ING5…	Astro
1089	GO_Biological_Process_2023__Positive Regulation Of Inflammatory Response (GO:0050729)	0.279052	2.1203	0	0.0482785	0.77	34/73	21.56%	TLR2;NLRP10;OSMR;PLCG2;NUPR1;TSLP;SERPINE1;AGTR1;NLRP12;NLRP3;IL23A;MEFV;CEBPA;IL15;LCP1;CASP4;IL16;ZP3;ETS1;NLRP1;TLR3;AIM2;MGST2;NFKBIZ;ADAM8;NLRC4;MDK;TNFRSF1A;TRADD;TNFSF4;PDCD4;TNIP1;VAMP8;TLR4	Astro
1090	KEGG_2021_Human__Complement and coagulation cascades	0.303363	2.12021	0	0.0467482	0.77	25/57	16.08%	C4B;C7;C4A;CFI;SERPINC1;C6;C5AR1;SERPINE1;TFPI;C4BPA;C3;F13A1;C1QC;CPB2;PLG;F2;C1R;SERPING1;CR1;C2;CD55;VWF;PROS1;F2R;PLAUR	Astro
1091	WikiPathway_2023_Human__Monoamine GPCRs WP58	-0.435905	-2.11999	0	0.0114063	0.735	16/28	19.20%	ADRA2A;CHRM1;HTR2A;HTR6;HTR5A;HRH2;ADRA2B;DRD1;HTR2B;HTR4;CHRM2;HTR1F;ADRA1B;DRD2;ADRA1D;CHRM3	Astro
1092	KEGG_2021_Human__Antigen processing and presentation	-0.366555	-2.1116	0	0.0123055	0.763	28/50	27.20%	HLA-DQB1;HSPA1A;KLRC1;HSPA6;HSPA1B;HLA-DMB;HSPA8;HLA-DPA1;HLA-DOB;CD8A;HLA-C;CALR;HSP90AB1;CD74;HSPA1L;PSME1;HLA-A;HSPA2;CD4;HLA-B;HSPA5;HSP90AA1;CTSL;HLA-E;B2M;CTSS;TAP1;RFXANK	Astro
1093	GO_Biological_Process_2023__Heart Contraction (GO:0060047)	-0.436696	-2.11098	0	0.0123025	0.765	19/30	26.76%	KCNE5;SCN3B;SCN4B;MYH7;RANGRF;ATP1B1;TNNT2;SCN5A;SLC8A1;SCN2B;SCN1B;TCAP;RYR2;SGCG;SOD1;GAA;SGCD;TTN;SGCZ	Astro
1094	GO_Biological_Process_2023__Regulation Of B Cell Differentiation (GO:0045577)	-0.52854	-2.11096	0.00157978	0.0122277	0.765	12/16	26.41%	ID2;CD27;ZFP36L2;SFRP1;SPI1;MMP14;SYK;INHBA;INPP5D;ZFP36L1;INHA;IKZF3	Astro
1095	GO_Biological_Process_2023__Glycolytic Process (GO:0006096)	-0.448952	-2.10294	0.0015528	0.0130036	0.78	17/25	29.86%	TPI1;PGAM2;GAPDH;ALDOB;ENO2;ALDOC;HK2;GCK;LDHA;PFKFB2;PGAM1;ENO3;PKM;PGK1;ENO1;PFKL;GPI	Astro
1096	GO_Biological_Process_2023__Cellular Response To Metal Ion (GO:0071248)	-0.288458	-2.09865	0	0.013365	0.794	69/121	37.88%	CRHBP;SYT5;MT3;FOS;SYT4;NEUROD2;SLFN14;SYT1;CDH1;SYT13;KCNA1;JUN;CACNA1H;SLC13A5;MT4;SCN5A;GLRA2;SYT7;ALOX5AP;MT1A;ALOX15;SMPD1;CPNE9;SNCA;MT2A;CPNE7;MT1M;PPIF;CPNE4;ANK3;CPNE5;SYT6;SYT2;DPEP1;DAXX;ITPKA;RASA4;TIGAR;MT1G;GLRA1;NLGN1;MT1E;SYT15;MT1X;SYT10;RASGRP2;WNT5A;ADCY1;BNIP3;KCNH1;B2M;PRNP;F3;TFR2;CPNE6;ATP13A2;GUCA1A;CPNE2;MT1F;DMTN;SYT11;MCOLN1;CLU;MAPK3;AKT1;ZNF658;CPNE1;ECT2;DLG4	Astro
1097	GO_Biological_Process_2023__Regulation Of Monoatomic Ion Transmembrane Transporter Activity (GO:0032412)	-0.335337	-2.09327	0	0.0139965	0.81	30/66	22.88%	CRH;CRHBP;KCNE5;SHISA8;FXYD6;YWHAH;SCN3B;SCN4B;FXYD7;RANGRF;CACNG3;CACNG8;HCN2;PRRT1;GPD1L;OPRM1;PPIF;SHISA7;MAPK8IP2;SCN2B;CACNG5;SCN1B;CHRM3;RELN;NLGN1;SHANK1;PHB2;HCN1;PTPN3;FXYD1	Astro
1098	GO_Molecular_Function_2023__Potassium Channel Activity (GO:0005267)	-0.329138	-2.08745	0	0.0146618	0.828	36/71	23.40%	KCNF1;KCNE5;KCNK1;KCNMB2;KCNK9;KCNK3;KCNV1;KCND2;GRIK3;KCNK7;KCNA1;KCNA4;KCNMB4;KCNK2;KCNS2;KCNG1;CCDC51;KCNH3;LRRC52;KCNC2;KCNH4;HCN2;KCNK12;KCNA6;KCNT1;KCNV2;KCNH8;KCNN4;LRRC38;KCNMB1;GRIK1;KCNG2;TMEM38A;HCN1;KCNQ5;KCNH5	Astro
1099	GO_Biological_Process_2023__Lipid Modification (GO:0030258)	-0.396576	-2.08656	0.00436047	0.0147759	0.83	23/37	32.65%	PLA2G7;PLPPR3;DGKB;PLPP2;PLPP4;PLPPR4;MBOAT4;ALOX15B;PLPPR1;SGPP2;DGKZ;ALOX15;PLPPR5;CYP3A4;ALOX5;PLPP6;PORCN;CYP3A5;CYP2E1;PLPPR2;DGKI;DGKA;MBOAT7	Astro
1100	GO_Biological_Process_2023__Negative Regulation Of Antigen Receptor-Mediated Signaling Pathway (GO:0050858)	-0.502989	-2.08144	0.00161812	0.0154346	0.846	14/19	31.91%	THY1;PHPT1;CD300A;LILRB4;CD22;DGKZ;LAPTM5;GBP1;PTPN22;GPS2;PRNP;SLA2;EZR;CEACAM1	Astro
1101	GO_Biological_Process_2023__Cell Morphogenesis Involved In Neuron Differentiation (GO:0048667)	-0.31773	-2.08017	0	0.0155286	0.849	42/74	38.70%	CCK;RAB3A;CDK5;APLP1;SLITRK1;S100A6;NEFH;WNT7A;SSNA1;DSCAML1;PLPPR4;SLITRK4;SLITRK5;SLITRK3;NTNG1;TRIM46;PAK3;ANK3;MAP1B;ADGRB1;MAPK8IP2;DRD2;CDHR1;DCC;MFSD2A;MAP1A;POU4F1;CNTN4;BAIAP2;S100B;DCDC2;APP;MAP1S;CELSR2;DVL1;BRSK2;TAOK2;MAP2;BRSK1;SPTBN4;LLGL1;RAB8A	Astro
1102	GO_Molecular_Function_2023__Peptidase Inhibitor Activity (GO:0030414)	-0.4393	-2.07587	0.00159236	0.0159899	0.858	14/26	20.70%	PCSK1N;SPINK2;CST3;SPINT2;SERPIND1;THBS1;CSTB;SERPINF2;ITIH4;TIMP1;ITIH2;WFDC2;PZP;RENBP	Astro
1103	WikiPathway_2023_Human__Common Pathways Underlying Drug Addiction WP2636	-0.38174	-2.07478	0.00150602	0.0160724	0.861	24/39	37.63%	GRIN1;PPP1R1A;GJB1;PRKCG;DRD1;GRIA1;GRIA3;ACTB;PRKCB;ACTG1;DRD2;GRIA4;GRIN2A;GRM5;CAMK2A;ADCY1;CALM1;DRD4;PPP1CA;CAMK4;ARAF;MAP2K2;MAPK3;GRM1	Astro
1104	GO_Biological_Process_2023__Neuron Projection Morphogenesis (GO:0048812)	-0.271127	-2.06569	0	0.0173535	0.88	73/140	38.70%	CCK;NRN1;RAB3A;CDK5;NGF;APLP1;UBB;SLITRK1;S100A6;FLRT1;NEFH;WNT7A;SSNA1;DCLK1;DSCAML1;BDNF;PLPPR4;PACSIN1;MNX1;LRP2;NBL1;ZNF365;SLITRK4;SLITRK5;TNN;EPHB3;SLITRK3;TUNAR;EPB41L3;NTNG1;FLRT3;DOCK10;TRIM46;PAK3;SPACDR;ANK3;SGK1;MAP1B;ADGRB1;MAPK8IP2;NYAP2;DRD2;NLGN1;SHANK1;CNTNAP1;DCC;MAP1A;POU4F1;CNTNAP2;GAS7;CNTN4;BAIAP2;EPHB1;S100B;PLXNB1;DCDC2;APP;MAP1S;NYAP1;CELSR2;KIF20B;DVL1;BRSK2;TAOK2;MAP2;P…	Astro
1105	GO_Molecular_Function_2023__Growth Factor Activity (GO:0008083)	-0.349477	-2.06419	0	0.0174601	0.881	33/53	31.74%	CSPG5;NGF;CLCF1;DKK1;FGF20;BDNF;ANGPTL3;GDNF;FGF8;PDGFB;CLEC11A;NRTN;VEGFA;VEGFB;FGF9;GRN;INHBA;IL12A;FGF7;THPO;PSPN;JAG2;FGF18;EPGN;FGF10;VEGFC;OSGIN2;INHA;NRG1;IL7;JAG1;PTN;FGF22	Astro
1106	GO_Biological_Process_2023__Negative Regulation Of Smooth Muscle Cell Proliferation (GO:0048662)	-0.409611	-2.06395	0.00158228	0.0173856	0.882	16/34	16.49%	APOE;AIF1;BMP4;VIP;PTGIR;CDKN1A;CNN1;IGFBP5;TRIB1;APLN;IGFBP3;APOD;OGN;NDRG4;IL12A;BMP2	Astro
1107	WikiPathway_2023_Human__Hematopoietic Stem Cell Differentiation WP2849	0.320457	2.06305	0.00294985	0.0677734	0.891	21/42	19.25%	TPO;MYB;LEF1;RHOH;FLI1;KCNH2;GATA1;RUNX1;IRF5;LMO2;NCKAP1L;ITGA2B;CIITA;ITGB3;KITLG;VAV1;TNXB;CSF1;NFATC2;ACVR1B;STAT5A	Astro
1108	GO_Biological_Process_2023__Synaptic Transmission, Glutamatergic (GO:0035249)	-0.43611	-2.06296	0.00311042	0.0174377	0.884	15/26	26.09%	SLC17A7;GRID2;SLC17A6;SLC17A8;GRIN3A;GRIK3;GRIA1;GRIA3;GRIN2B;GRIA4;GRIN2A;GRIK1;UNC13C;GRIN2D;GRIN2C	Astro
1109	GO_Biological_Process_2023__Regulation Of Peptidase Activity (GO:0052547)	-0.480954	-2.05844	0.0015873	0.0181466	0.893	16/21	35.12%	NDUFA13;CST3;CTSH;ECM1;CSTB;CAV1;MAPK12;PSMB8;CTSL;CTSS;SVBP;FURIN;ATP13A2;PINK1;CTSV;CTSB	Astro
1110	WikiPathway_2023_Human__GPCRs Class B Secretin Like WP334	0.409498	2.05683	0.00566572	0.0685472	0.904	11/22	12.12%	ADGRE1;GLP1R;SCTR;CRHR2;PTH2R;ADGRL4;GHRHR;LINC02210-CRHR1;GLP2R;ADGRE5;ADGRL2	Astro
1111	WikiPathway_2023_Human__Cholesterol Biosynthesis Pathway In Hepatocytes WP5329	-0.375292	-2.05668	0.0014881	0.0183699	0.897	32/40	46.72%	CH25H;MVD;SCD;IDI1;EBP;HMGCS1;DHCR24;MSMO1;TM7SF2;FDPS;ABCG1;HMGCR;PLPP6;CYP51A1;ACOT1;ACOT2;SC5D;ACAT2;SREBF1;ELOVL4;HSD17B7;FADS2;PMVK;NSDHL;ELOVL5;NR1H2;FDFT1;CYP46A1;NR1H3;MVK;GGPS1;LSS	Astro
1112	GO_Biological_Process_2023__Positive Regulation Of Smooth Muscle Cell Proliferation (GO:0048661)	-0.373881	-2.05663	0.00307692	0.0182787	0.897	27/41	35.57%	HES5;NR4A3;ID2;AIF1;BMP4;JUN;IGF1;IGFBP5;CCL5;PDGFB;CCN4;THBS1;IL18;FGF9;SERPINF2;CX3CL1;PHB1;EREG;CDH13;EDN1;NOX1;RBPMS2;GJA1;PDGFRB;MEF2D;FOXJ2;AKT1	Astro
1113	GO_Biological_Process_2023__Glial Cell Differentiation (GO:0010001)	-0.41107	-2.05643	0.0015361	0.0181951	0.897	22/31	34.82%	HES5;CDK5;VCAN;HAPLN1;SLC8A3;BCAN;HAPLN3;SOX10;SOX8;METRN;HAPLN2;MYRF;NCAN;ERBB3;RELN;FGF10;GPC1;TPPP;SOX9;SOX2;MMP24;EIF2B5	Astro
1114	GO_Biological_Process_2023__Regulation Of Neuron Apoptotic Process (GO:0043523)	-0.296463	-2.05457	0	0.0184334	0.901	44/92	29.41%	PLA2G3;EGR1;MT3;VSTM2L;CDK5;APOE;NGF;CLCF1;GRID2;UBB;MAG;DDIT3;DKK1;AGAP2;FGF20;PRKCG;BDNF;GDNF;CDK5R1;GRM4;FZD9;FOXQ1;NDNF;NFATC4;TOX3;SIGMAR1;GRN;ATF4;ERBB3;SEMA3E;SOD1;NSMF;BAX;SET;POU4F1;FAIM2;PARK7;PRNP;KCNB1;CRLF1;IL27RA;ATP13A2;PINK1;AKT1S1	Astro
1115	MSigDB_Hallmark_2020__DNA Repair	-0.266547	-2.0532	0	0.0185732	0.905	96/146	47.61%	POLR2I;NME1;APRT;TYMS;GPX4;POLR2J;EDF1;POLR3GL;GUK1;NME4;MRPL40;SAC3D1;ALYREF;VPS28;TARBP2;ADRM1;MPG;NME3;SUPT4H1;FEN1;NT5C;CDA;ARL6IP1;PNP;POLR2G;RPA3;CETN2;POLD1;POLR2K;POLE4;HCLS1;EIF1B;NELFE;BRF2;TAF1C;AK1;BCAP31;SURF1;MPC2;VPS37D;BCAM;DAD1;POLD4;POLR2E;GTF2F1;TAF10;PRIM1;ADA;SSRP1;CLP1;SNAPC5;AAAS;NCBP2;NELFCD;TAF6;RFC5;PCNA;POLR2H;ERCC2;GTF2A2;POLA2;POLR2C;NUDT21;GMPR2;COX17;POLR2F;CANT1;SD…	Astro
1116	GO_Biological_Process_2023__Cilium-Dependent Cell Motility (GO:0060285)	0.446742	2.0524	0.00802139	0.0682864	0.906	9/18	14.87%	TEKT2;TEKT1;TEKT3;CFAP54;TEKT5;DNAI3;RSPH9;DNAH7;DNAH2	Astro
1117	GO_Molecular_Function_2023__Glutamate Receptor Activity (GO:0008066)	-0.529588	-2.04875	0	0.0191236	0.909	11/15	28.85%	GRID2;GRM2;GRIN3A;GRIK3;GRM4;GRM3;GRIA4;GRM5;GRIN2D;GRM8;GRM6	Astro
1118	GO_Biological_Process_2023__rRNA Metabolic Process (GO:0016072)	-0.303324	-2.04648	0	0.0193712	0.914	63/88	48.24%	RPS15;WDR18;RPS28;RPS27;RPL26;RPL27;SLFN14;RPS25;RPL11;RPS16;RPS17;RPL7;TRIR;RPL35A;RPS6;EXOSC4;RPL5;RRP9;RPS7;EXOSC5;RPL14;RPS19;NOC4L;MRTO4;ZFP36L1;CAVIN1;POLR1G;BYSL;DDX54;POP4;NOP56;EBNA1BP2;RPS24;EMG1;SPPL2B;WDR74;NOP53;SIRT7;GTF3A;PIH1D1;DEDD2;RRP7A;PES1;NOL6;SBDS;EXOSC6;RRP12;NOB1;FBL;DKC1;PIH1D2;EXOSC2;DDX49;RRP36;DDX27;PELP1;NIFK;EXOSC9;EXOSC3;DCAF13;MARS1;WDR55;MAPT	Astro
1119	GO_Biological_Process_2023__Defense Response To Gram-positive Bacterium (GO:0050830)	-0.384446	-2.04564	0.0014881	0.0193902	0.915	22/36	25.51%	FAU;RNASE1;CHGA;ROMO1;GBP7;DMBT1;H2BC21;PGLYRP2;IL18;RPL39;IL12A;GSDMD;PGLYRP1;LYZ;LYG2;PPP1R11;RARRES2;MYD88;HLA-A;LYG1;STAB2;HLA-E	Astro
1120	GO_Cellular_Component_2023__AMPA Glutamate Receptor Complex (GO:0032281)	-0.485152	-2.04471	0.00319489	0.0194526	0.916	11/19	17.64%	SHISA8;CACNG3;CACNG8;GRIA1;GRIA3;VWC2L;VWC2;SHISA7;OLFM2;GRIA4;CACNG5	Astro
1121	GO_Biological_Process_2023__Positive Regulation Of Peptidase Activity (GO:0010952)	-0.462527	-2.04195	0	0.0198304	0.92	16/22	33.11%	PRELID1;NDUFA13;CTSH;PSENEN;GRN;MAPK12;PSME1;DDRGK1;CTSL;CTSS;PINK1;PSME2;PSME3;CLDN4;NCSTN;CTSV	Astro
1122	GO_Biological_Process_2023__Positive Regulation Of Synaptic Transmission (GO:0050806)	-0.314997	-2.0399	0.00136986	0.0201299	0.925	39/72	30.34%	PLK2;GRIN1;SYT1;SLC8A3;ZDHHC12;RGS14;CACNG3;SLC8A2;DRD1;SLC24A2;CACNG8;NMU;VAMP2;PRKCZ;NFATC4;GRIN2B;BAIAP3;SHISA7;RIMS3;CACNG5;GRIN2A;STX1B;CLSTN3;ADRA1D;RELN;NLGN1;AKAP5;APEX1;SHANK2;CLSTN2;AGER;GPER1;GRIN2D;GRIN2C;CACNG2;RIMS2;RIMS1;GRIK2;APP	Astro
1123	GO_Biological_Process_2023__Positive Regulation Of Neuroblast Proliferation (GO:0002052)	-0.510418	-2.03659	0.00169492	0.0205424	0.93	10/17	18.09%	CX3CR1;VCAN;HAPLN1;BCAN;HAPLN3;VEGFA;HAPLN2;NCAN;DRD2;CX3CL1	Astro
1124	WikiPathway_2023_Human__Complement System In Neuronal Development And Plasticity WP5090	0.253013	2.03568	0	0.0740689	0.93	43/91	25.10%	C4B;C7;C4A;CFI;ATP8B3;FCN2;C6;COLEC10;C5AR1;COLEC12;C4BPA;C3;C1QC;ATP10A;PLSCR1;CFP;C1R;C5AR2;SERPING1;ITGB3;COLEC11;LLGL2;CR1;C2;FAS;CD55;PROS1;PLSCR4;PARD6B;APAF1;CASP10;BAK1;PARD3;TYRO3;DIABLO;MERTK;GAS6;ATP11A;C1S;CASP7;DEDD;PARD6G;PATJ	Astro
1125	GO_Biological_Process_2023__Adenylate Cyclase-Modulating G Protein-Coupled Receptor Signaling Pathway (GO:0007188)	-0.274458	-2.03359	0	0.020932	0.935	55/119	25.20%	ADRA2A;ADCYAP1;OPRK1;RGS1;GPR3;RAMP2;MCHR1;VIP;CNR1;VIPR1;RAMP3;PTGIR;UTS2;GNA15;GPR26;VIPR2;PDE2A;ADM;NPY1R;ADGRG3;DRD1;GIPR;CALCR;ADGRG5;PTGER3;ADM5;ADGRE2;CHRM2;ADGRB2;ADGRG7;GALR3;HTR1F;CALCRL;ADRA1B;GPR171;GABBR2;ADGRB1;FPR1;PTHLH;ADGRD2;ADGRD1;ADRA1D;TCP11;AKAP5;ADGRG2;GPR37L1;TSHR;OPRL1;ADGRG1;PSAP;P2RY12;GPER1;ADCY1;ADGRF5;GPR37	Astro
1126	GO_Biological_Process_2023__Positive Regulation Of Leukocyte Migration (GO:0002687)	0.409765	2.03231	0.00519481	0.0733424	0.935	13/22	17.70%	ICAM1;F2RL1;PLVAP;NCKAP1L;ZP3;FUT4;JAM3;IL6R;ADAM8;LYVE1;CSF1;MDK;LGALS3	Astro
1127	GO_Biological_Process_2023__Organic Cation Transport (GO:0015695)	0.383871	2.03013	0.00826446	0.0721553	0.938	16/26	27.89%	SLC22A16;SLC29A3;SLC19A3;SLC47A1;SLC22A2;SLC22A3;SLC47A2;SLC6A12;PDZK1;SLC44A5;SLC22A18;SLC44A2;SLC25A42;SEC14L1;RALBP1;SLC22A5	Astro
1128	GO_Biological_Process_2023__Ribosomal Large Subunit Biogenesis (GO:0042273)	-0.345813	-2.02881	0	0.0215716	0.942	32/51	37.85%	RPL26;RPL10;RPL11;RPL7;RPL23A;RPL35A;RPL5;EIF6;NOP16;PPAN;TRAF7;RPL14;RRS1;MRTO4;NOP2;MRPL20;RPL26L1;RSL24D1;RPL6;EBNA1BP2;WDR74;NOP53;RPLP0;SURF6;GTF3A;ZNF622;PES1;NIP7;BRIX1;NOC2L;MAK16;PAK1IP1	Astro
1129	GO_Biological_Process_2023__Ribosome Biogenesis (GO:0042254)	-0.263975	-2.02347	0	0.0224992	0.946	95/150	46.50%	RPS15;WDR18;RPS11;RPS28;RPS27;RPS14;RPL26;RPL27;RPS13;RPS9;RPS23;MRPL36;RPS8;RPS25;RPS5;RPS4X;RPS3A;RPL11;RPS16;RPS17;RPS19BP1;RPL7;MRPS12;RPL35A;RPS6;EXOSC4;RPL5;RPS15A;RRP9;RPS7;EXOSC5;NOP16;BOP1;RPL14;SNU13;RPS19;RRS1;NOC4L;MRTO4;GRWD1;TBL3;GLUL;RPL26L1;BYSL;RSL24D1;DDX54;POP4;NOP56;EBNA1BP2;RPS24;EMG1;SPPL2B;WDR74;NOP53;SURF6;GTF3A;WDR46;PIH1D1;ZNF622;RRP7A;PES1;NOL6;SBDS;NIP7;PNO1;NOC2L;METT…	Astro
1130	GO_Biological_Process_2023__Cellular Defense Response (GO:0006968)	0.37245	2.02178	0.00808625	0.0743931	0.942	12/28	13.55%	TCIRG1;FCMR;C5AR1;MNDA;TYROBP;NCR1;CCR3;ITK;IL1RL2;GNLY;FOSL1;NCF2	Astro
1131	GO_Cellular_Component_2023__U2-type Spliceosomal Complex (GO:0005684)	-0.300273	-2.02166	0	0.0227816	0.95	71/89	53.99%	SNRPD2;RNF113B;SNRPN;SF3B5;LSM4;EIF4A3;LSM7;RNF113A;SNRPB;LSM3;SNU13;LSM2;PHF5A;RBM8A;SF3B4;ZMAT2;HTATSF1;SF3B6;BCAS2;SF3A1;PRPF19;PRPF31;LSM5;SNRNP70;ISY1;XAB2;SNRPE;BUD31;SRRM2;PLRG1;CWC15;RBM22;SYF2;U2AF2;SF3B2;YJU2;SNRPD3;SNRPB2;RBMX2;DHX16;SNRPG;IK;SF3A2;SNRPD1;CWC25;PPIL1;SF3A3;PRPF4;SNRPA1;CRNKL1;CCDC12;LUC7L3;MAGOHB;SNRPF;TXNL4A;PPIE;TFIP11;LUC7L;SNRNP200;SF3B1;PRPF6;CDC40;PRPF8;PRPF38A;C…	Astro
1132	WikiPathway_2023_Human__Dravet Syndrome WP5200	-0.42255	-2.01998	0	0.0229476	0.953	17/27	35.57%	SCN3B;SCN4B;SCN2A;MLST8;SCN1A;SCN3A;SCN2B;FGF13;SCN1B;HCN1;CAMK2A;MAPK11;CALM1;PRR5;PCDH19;KCNA2;AKT1	Astro
1133	WikiPathway_2023_Human__Eicosanoid Synthesis WP167	-0.448809	-2.01628	0	0.0236451	0.959	13/22	19.95%	PTGS2;PLA2G5;PTGDS;ALOX15B;ALOX12;ALOX5AP;ALOX15;PLA2G4A;DPEP1;PTGIS;PTGES2;ALOX5;LTC4S	Astro
1134	GO_Biological_Process_2023__Ribonucleoprotein Complex Biogenesis (GO:0022613)	-0.278965	-2.01439	0.00135318	0.0238871	0.962	63/116	37.85%	RPS15;RPS11;RPS28;RPS27;RPS14;RPL26;RPS13;RPS9;RPS23;MRPL36;RPS8;RPS25;RPS5;RPS4X;RPS3A;RPL38;RPL11;RPS16;RPS17;RPS19BP1;RPL7;MRPS12;RPL35A;RPS6;RPL5;RPS15A;RRP9;RPS7;NOP16;BOP1;RPL14;SNU13;RPS19;RRS1;MRTO4;GRWD1;TBL3;GLUL;RPL26L1;BYSL;RSL24D1;NOP56;EBNA1BP2;RPS24;EMG1;SPPL2B;WDR74;SURF6;GTF3A;WDR46;ZNF622;RRP7A;PES1;NOL6;NIP7;PNO1;NOC2L;METTL17;ZNF658;UTP3;DNTTIP2;FBL;PAK1IP1	Astro
1135	GO_Biological_Process_2023__Adenylate Cyclase-Inhibiting G Protein-Coupled Receptor Signaling Pathway (GO:0007193)	-0.362159	-2.01131	0	0.0243491	0.964	25/42	29.13%	ADRA2A;OPRK1;RGS1;CHRM1;MCHR1;HRH3;HTR5A;PDE2A;NPY1R;GRM4;CHRM2;HTR1F;OPRM1;GABBR2;DRD2;CHRM3;AKAP5;GPR37L1;OPRL1;PSAP;P2RY12;GPR37;DRD4;GRM8;HRH4	Astro
1136	GO_Biological_Process_2023__Negative Regulation Of Neuron Differentiation (GO:0045665)	-0.462051	-2.01002	0.00304414	0.0244973	0.965	15/21	37.56%	SOX3;HES5;DISP3;HES1;TUNAR;DLX1;SIX3;CALR;HEY1;CNTN4;B2M;SOX9;SOX2;DLL1;DTX1	Astro
1137	GO_Biological_Process_2023__Negative Regulation Of Epithelial Cell Migration (GO:0010633)	-0.419934	-2.00961	0	0.0244352	0.966	13/28	18.50%	APOE;DLL4;PFN2;ADAMTS9;THBS1;DCN;EPPK1;MARVELD3;PTPRR;ADGRB1;DUSP10;NR2F2;SLIT2	Astro
1138	WikiPathway_2023_Human__Metabolic Reprogramming In Colon Cancer WP4290	-0.365267	-2.00881	0.00150602	0.0244602	0.966	34/41	50.49%	GAPDH;ALDOB;LDHA;PGAM1;SHMT2;PDHB;PYCR1;FASN;PYCR2;TIGAR;MDH2;SLC16A3;PKM;PGK1;TALDO1;ENO1;PFKL;GPI;PDHA1;G6PD;SLC2A1;ACO2;IDH3A;ACLY;FH;TKT;GOT2;PSPH;GLS;PSAT1;SDHB;GART;IDH2;PAICS	Astro
1139	GO_Cellular_Component_2023__Mitochondrial Envelope (GO:0005740)	-0.270311	-2.00473	0	0.0252822	0.968	71/136	36.78%	BLOC1S1;PRELID1;NDUFA13;CYCS;NDUFS3;IFI27L2;AQP8;NDUFB7;ARL2;TIMM10;NDUFA1;TIMM13;NDUFA2;SLC25A4;CHCHD2;NME4;ATP5F1B;STOML2;NDUFA6;CHCHD10;ATCAY;FZD9;TRIAP1;GPAT2;IFI27;TMEM70;TIMM8B;HCRT;SDHD;IRGM;HTRA2;NAT8L;ALPL;HAX1;NDUFA8;COA6;IFI6;SOD1;BOK;TIMM8A;NDUFAB1;ABCD1;GPER1;BNIP3;OXA1L;NDUFAF4;CHCHD4;UQCC2;VDAC2;PINK1;FKBP8;NDUFA9;NGRN;CHCHD5;ARL2BP;GUCY2C;COA7;TMEM14A;TMEM14B;VDAC1;TMEM14C;BNIP1;T…	Astro
1140	GO_Biological_Process_2023__Protein Insertion Into Mitochondrial Membrane (GO:0051204)	-0.414823	-2.00463	0.00319489	0.025194	0.968	25/27	53.69%	NDUFA13;TOMM22;TIMM10;TIMM13;ROMO1;MOAP1;TOMM7;TIMM8B;TIMM8A;MTX1;HSP90AA1;TOMM20;MTCH1;TOMM5;TOMM40;TIMM22;TIMM10B;COX18;TIMM29;SAMM50;TRMT10B;HSPA4;MTX2;TIMM9;MTCH2	Astro
1141	GO_Biological_Process_2023__Regulation Of Presynapse Organization (GO:0099174)	-0.538155	-2.00388	0.00151515	0.0250996	0.969	10/15	21.37%	SLITRK1;WNT7A;LRFN4;SLITRK3;SNCA;IL1RAPL2;LRRTM3;LRFN5;LRRC4B;IL1RAPL1	Astro
1142	GO_Biological_Process_2023__Regulation Of Presynapse Assembly (GO:1905606)	-0.538155	-2.00388	0.00151515	0.0250996	0.969	10/15	21.37%	SLITRK1;WNT7A;LRFN4;SLITRK3;SNCA;IL1RAPL2;LRRTM3;LRFN5;LRRC4B;IL1RAPL1	Astro
1143	MSigDB_Hallmark_2020__KRAS Signaling Up	-0.249056	-2.00378	0	0.0249801	0.969	63/174	19.84%	G0S2;PCSK1N;RBP4;ID2;RGS16;MAFB;NGF;PTGS2;DUSP6;C3AR1;CXCR4;SCG5;IL10RA;SPP1;PPP1R15A;WNT7A;FCER1G;GUCY1A1;TMEM158;CMKLR1;ANXA10;ALDH1A3;TSPAN7;MYCN;ETV5;IKZF1;TRIB1;NAP1L2;TNNT2;SNAP25;PLAU;ITGA2;TMEM176A;DOCK2;ANGPTL4;EPB41L3;IGFBP3;TSPAN1;CFH;APOD;ARG1;FGF9;LAPTM5;NR1H4;INHBA;KCNN4;PTPRR;KLF4;YRDC;CBX8;ITGB2;HSD11B1;BMP2;LY96;CCND2;PLAT;PSMB8;SCN1B;BTC;EREG;PCP4;RELN;PEG3	Astro
1144	GO_Molecular_Function_2023__Serine-Type Endopeptidase Activity (GO:0004252)	-0.311981	-2.00284	0.00141243	0.0250071	0.97	37/72	26.14%	HPR;KLK6;PRSS36;PROC;CTSH;PCSK1;MMP19;F12;TPSD1;PRSS54;F7;PRSS3;PLAU;DPP4;HP;F10;CELA2B;MMP14;TLL2;MASP2;TLL1;PCSK2;PARL;CELA2A;HTRA2;PLAT;CEL;CORIN;APEH;HGFAC;CFD;RHBDL1;PRSS12;MMP11;PCSK4;CTSS;F11	Astro
1145	WikiPathway_2023_Human__Cholesterol Biosynthesis Pathway WP197	-0.533396	-2.00242	0.00643087	0.0249782	0.971	15/15	46.72%	MVD;IDI1;HMGCS1;MSMO1;FDPS;SQLE;DHCR7;HMGCR;CYP51A1;SC5D;PMVK;NSDHL;FDFT1;MVK;LSS	Astro
1146	GO_Biological_Process_2023__Long-Term Synaptic Potentiation (GO:0060291)	-0.467841	-2.00227	0.00310078	0.0248778	0.971	13/20	26.09%	PLK2;SLC8A3;RGS14;SLC8A2;SLC24A2;VAMP2;PRKCZ;NFATC4;GRIN2B;GRIN2A;SHANK2;GRIN2D;GRIN2C	Astro
1147	GO_Biological_Process_2023__Modulation Of Excitatory Postsynaptic Potential (GO:0098815)	-0.400866	-1.99912	0	0.025444	0.974	20/31	33.00%	CBLN1;GRIN1;WNT7A;SLC8A3;SLC8A2;PRKCZ;GRIN2B;NETO1;GRIN2A;STX1B;RELN;NLGN1;SHANK1;GRIN2D;GRIN2C;TMEM25;RIMS2;RIMS1;NLGN3;TMEM108	Astro
1148	GO_Biological_Process_2023__Adenylate Cyclase-Activating G Protein-Coupled Receptor Signaling Pathway (GO:0007189)	-0.299274	-1.99425	0	0.0265464	0.975	37/77	24.52%	ADRA2A;ADCYAP1;GPR3;RAMP2;VIP;RAMP3;PTGIR;UTS2;GNG2;GPR26;ADRA2B;ADM;ADGRG3;DRD1;GIPR;CALCR;ADGRG5;PTGER3;ADM5;ADGRE2;ADGRB2;ADGRG7;CALCRL;ADRA1B;ADGRB1;PTHLH;DRD2;ADGRD2;ADGRD1;ADRA1D;TCP11;ADGRG2;TSHR;ADGRG1;GPER1;ADCY1;ADGRF5	Astro
1149	WikiPathway_2023_Human__NRXN1 Deletion Syndrome WP5398	-0.511351	-1.99153	0	0.0270931	0.978	16/16	48.92%	GRIN1;GRIN3A;GRIA1;GRIA3;GRIN2B;GRIA4;GRIN2A;NLGN1;GRIN2D;GRIN2C;NLGN3;DLG4;NLGN2;NRXN1;NLGN4X;GRIA2	Astro
1150	GO_Biological_Process_2023__Regulation Of Activated T Cell Proliferation (GO:0046006)	-0.431599	-1.99077	0.00642055	0.027087	0.98	18/25	35.11%	IGFBP2;TNFSF9;IGF1;IDO1;LILRB4;ICOSLG;IL18;CD24;IL23R;CD274;IL12RB1;FOXP3;PDCD1LG2;FADD;PRNP;SCRIB;PRKAR1A;RPS3	Astro
1151	GO_Biological_Process_2023__Positive Regulation Of Immune Response (GO:0050778)	0.281731	1.98778	0	0.0910651	0.97	22/56	18.93%	C7;TASL;C6;F2RL1;NOD2;GPR151;NLRP3;PTPRC;HLA-DRA;IL23A;RSAD2;PLSCR1;CFP;IL15;HLA-DRB1;LGALS9;ZP3;SKAP1;XBP1;CD226;TRIM56;TNFSF4	Astro
1152	GO_Cellular_Component_2023__Glutamatergic Synapse (GO:0098978)	-0.311789	-1.98704	0	0.027771	0.981	41/76	32.21%	APOE;NPTX2;HRAS;SLITRK1;ADGRA1;NPTX1;CBLN1;WNT7A;RAC3;VPS18;SLITRK4;ACTB;SH3GL3;SRCIN1;SLC4A8;SH3GL2;ATP2B3;PIN1;SHISA7;PTPRD;DRD2;CACNG5;LRRC4;IL1RAPL2;LRRTM3;NLGN1;LRFN5;SPTB;LRRC4B;NPTXR;IL1RAPL1;NLGN4Y;WNT5A;LRRC4C;NELL2;RHOA;CADPS;DYNLL2;NOS1AP;RELA;NLGN3	Astro
1153	GO_Biological_Process_2023__Negative Regulation Of Viral Process (GO:0048525)	0.296832	1.98611	0	0.0900073	0.971	27/53	25.02%	LTF;IFITM1;OASL;OAS1;IFI16;ISG20;TRIM21;OAS2;ZFP36;RSAD2;PLSCR1;PITX3;MX1;APOBEC3G;APOBEC3F;ZC3HAV1;OAS3;TRIM14;TRIM11;IFIT5;IFIH1;TRIM32;TNIP1;MID2;FAM111A;MAVS;RNASEL	Astro
1154	WikiPathway_2023_Human__1P36 Copy Number Variation Syndrome WP5345	-0.296266	-1.98484	0.00141243	0.028223	0.981	38/84	28.38%	KRT17;HES5;HES4;GABRD;AURKAIP1;ISG15;C1QTNF12;PUSL1;SAMD11;PERM1;HSPA8;VTN;TMEM88B;CPTP;B3GALT6;TMEM52;PRKCZ;VEGFA;BTLA;KLHL17;CD160;MEPCE;TNFSF18;MUSK;MCM2;MRPL20;PANK4;PLCH2;SCNN1D;AGRN;ARF6;ACAP3;SDF4;PEX10;IFIT1;PEX12;CDK11A;TNFRSF14	Astro
1155	GO_Biological_Process_2023__Cellular Response To Estradiol Stimulus (GO:0071392)	-0.482925	-1.97671	0.00496689	0.0300636	0.985	10/17	23.97%	CRHBP;H2AZ1;SSTR1;SSTR2;RAMP3;SFRP1;RUVBL2;ZNF703;POU4F1;GPER1	Astro
1156	GO_Biological_Process_2023__Presynaptic Endocytosis (GO:0140238)	-0.403112	-1.9755	0.00606061	0.0302821	0.986	15/30	24.04%	SNCB;SYT5;CDK5;SNCG;SYT1;STX1A;PACSIN1;VAMP2;AP2M1;SNCA;AP2S1;SYT2;NLGN1;NLGN4Y;DNM1	Astro
1157	WikiPathway_2023_Human__TYROBP Causal Network In Microglia WP3945	0.287849	1.97439	0	0.0949674	0.982	23/51	19.25%	TCIRG1;IL13RA1;TNFRSF1B;CD37;CD84;TYROBP;HLX;C3;C1QC;KCNE3;RPS6KA1;SLC1A5;ABCC4;RBM47;NCKAP1L;DPYD;SLC7A7;ELF4;NCF2;CAPG;SH2B3;GIMAP2;STAT5A	Astro
1158	GO_Biological_Process_2023__Calcium Ion Homeostasis (GO:0055074)	-0.303114	-1.974	0	0.0305248	0.987	36/73	28.83%	GCM2;HTR2A;GRIN1;S100A14;TMEM203;ATP1B1;SLC8A3;STOML2;SLC8A2;CCL5;SLC24A2;HTR2B;SLC24A5;PLN;CAV1;SLC8A1;CALR;TPT1;SNCA;SLC24A4;FAM20A;ALPL;TRPV5;RYR2;ITPR3;ZNHIT1;TRPV4;CXCL12;CDH5;ATP13A1;ATP2A1;EDN1;DRD4;EDNRA;ATP2C2;ATP13A2	Astro
1159	GO_Molecular_Function_2023__Serine-Type Peptidase Activity (GO:0008236)	-0.299193	-1.97316	0.00140252	0.0305442	0.987	41/80	27.48%	KLK7;HPR;KLK6;PRSS36;PROC;CTSH;PCSK1;MMP19;F12;NAALAD2;TPSD1;PRSS54;F7;PRSS3;PLAU;DPP4;HP;F10;CELA2B;MMP14;TLL2;MASP2;TLL1;PCSK2;PARL;CELA2A;HTRA2;PLAT;CEL;CORIN;APEH;HGFAC;CFD;RHBDL1;PRSS12;MMP11;PCSK4;CTSS;F11;HTRA1;FURIN	Astro
1160	GO_Cellular_Component_2023__Spliceosomal snRNP Complex (GO:0097525)	-0.330147	-1.97309	0	0.0304011	0.987	43/56	50.11%	SNRPD2;SNRPN;SF3B5;LSM4;CD2BP2;LSM7;TSSC4;SNRPB;LSM3;SNU13;LSM2;TXNL4B;PHF5A;SF3B4;HTATSF1;SF3B6;SF3A1;PRPF31;LSM5;SNRNP70;SNRPE;SNRPA;SF3B2;SNRPD3;SNRPB2;RBMX2;SNRPG;SF3A2;DDX23;SNRPD1;SF3A3;PRPF4;SNRPA1;DDX39B;LUC7L3;SNRPF;TXNL4A;PPIH;LUC7L;SNRNP200;SF3B1;PRPF6;PRPF8	Astro
1161	GO_Biological_Process_2023__Cell Chemotaxis (GO:0060326)	-0.364549	-1.9722	0.00302572	0.030421	0.988	25/39	32.59%	ENC1;KIT;CCN3;CCL25;SEMA5A;NR4A1;EGR3;ARHGEF16;PDGFB;VEGFA;EPHA2;TNFRSF25;NELL1;PDGFRA;BIN2;CX3CL1;CXCL12;ARRB2;AZU1;RAB13;CORO1B;EPHB1;RHOG;PRKCQ;PDGFRB	Astro
1162	GO_Cellular_Component_2023__Organelle Envelope Lumen (GO:0031970)	-0.316766	-1.97199	0.0027972	0.0303162	0.988	35/63	36.68%	BLOC1S1;PRELID1;CYCS;NDUFB7;ARL2;TUBB2A;TIMM10;TIMM13;CHCHD2;NME4;STOML2;CHCHD10;TRIAP1;TIMM8B;HCRT;HTRA2;ALOX5;ALPL;HAX1;NDUFA8;COA6;SOD1;TIMM8A;CHCHD4;UQCC2;PINK1;APP;CHCHD5;ARL2BP;GUCY2C;COA7;THOP1;COA4;COX17;PRELID3B	Astro
1163	MSigDB_Hallmark_2020__TNF-alpha Signaling via NF-kB	-0.241863	-1.97162	0	0.0302588	0.988	84/178	29.60%	FOSB;G0S2;EGR1;TNC;DUSP2;NR4A3;ID2;FOS;PLK2;ATF3;PTGS2;CLCF1;SIK1;TUBB2A;DUSP1;GADD45B;PHLDA2;OLR1;CCN1;TNFSF9;PPP1R15A;JUNB;IER2;NR4A1;DUSP5;HES1;GPR183;IER5;JUN;CDKN1A;EGR3;MYC;NFKBIE;CCL5;TRIB1;FJX1;PLAU;SLC2A3;EIF1;TNFAIP6;VEGFA;ICOSLG;KLF2;CCND1;SNN;GADD45A;IL18;IER3;ZC3H12A;SGK1;TNFAIP2;FOSL2;RHOB;INHBA;KLF4;KLF10;YRDC;BMP2;ETS2;PMEPA1;PLEK;PER1;CEBPB;NFKB2;GEM;PHLDA1;EHD1;RCAN1;LAMB3;SAT1;…	Astro
1164	GO_Molecular_Function_2023__Proton Transmembrane Transporter Activity (GO:0015078)	-0.364453	-1.97062	0.00605144	0.0304177	0.988	13/39	8.54%	COX8A;COX7A1;UQCR10;SLC32A1;COX4I1;COX7C;ATP6V1F;COX5B;UQCRH;COX6B1;UQCRB;MFSD3;COX5A	Astro
1165	MSigDB_Hallmark_2020__IL-6/JAK/STAT3 Signaling	0.263704	1.97034	0	0.0954082	0.983	16/67	5.43%	SOCS3;CD44;IL1R1;TLR2;TNFRSF12A;IL13RA1;TNFRSF1B;OSMR;ITGA4;CXCL3;CD36;CXCL13;EBI3;CSF2RB;IL18R1;IL15RA	Astro
1166	GO_Molecular_Function_2023__rRNA Binding (GO:0019843)	-0.354554	-1.96855	0.0057971	0.0308254	0.989	32/45	43.86%	RPS14;RPS13;RPS9;RPS5;RPL12;RPL11;MRPS7;RPL5;CIRBP;ERAL1;PPAN;RRS1;CAVIN1;DDX28;MRPL11;EMG1;NOP53;RPLP0;RBM34;MRPL16;NGRN;GTF3A;TST;SBDS;RPS3;MRPS6;MRPL18;MRPS11;UTP23;NPM1;MRPS18A;MRPS18C	Astro
1167	GO_Biological_Process_2023__Ribosomal Large Subunit Assembly (GO:0000027)	-0.473541	-1.96787	0.00619195	0.0308581	0.989	13/19	29.99%	RPL10;RPL11;RPL23A;RPL5;PPAN;TRAF7;RRS1;NOP2;MRPL20;DDX28;RPL6;NOP53;RPLP0	Astro
1168	WikiPathway_2023_Human__Disruption Of Postsynaptic Signaling By CNV WP4875	-0.39279	-1.96614	0.0015456	0.0311131	0.989	24/33	44.07%	ARC;GRIN1;STX1A;RPH3A;GRIN2B;GRIN2A;NLGN1;RYR2;SHANK1;NRXN3;CAMK2A;YWHAG;GRIN2D;GRIN2C;SYNGAP1;NLGN3;NRXN2;MAPK3;GRM1;HOMER1;NLGN2;CAMK2G;CAMK2B;NRXN1	Astro
1169	WikiPathway_2023_Human__Prostaglandin And Leukotriene Metabolism In Senescence WP5321	-0.397256	-1.96557	0.00308166	0.0311441	0.99	15/30	19.95%	HRAS;PTGS2;CDKN1A;PTGDS;IGFBP5;ALOX15B;ALOX12;ALOX5AP;PTGER3;ALOX15;PLA2G4A;CYSLTR1;PTGIS;ALOX5;LTC4S	Astro
1170	GO_Biological_Process_2023__Regulation Of Neuroblast Proliferation (GO:1902692)	-0.444784	-1.96497	0.00332779	0.0311346	0.99	14/22	30.74%	CX3CR1;VCAN;HAPLN1;BCAN;HAPLN3;SIX3;VEGFA;HAPLN2;NCAN;DRD2;CX3CL1;TAFA1;SMARCD3;PTN	Astro
1171	WikiPathway_2023_Human__Proteasome Degradation WP183	-0.323653	-1.96487	0	0.0310404	0.99	48/59	55.13%	UCHL1;H2AZ1;PSMB10;PSMB6;UBB;PSMC3;PSMD8;UBC;PSMB3;HLA-C;PSMA7;PSMC5;PSMB4;PSMD10;PSME1;PSMB8;HLA-A;H2AX;HLA-B;PSMB5;UCHL3;HLA-E;PSMC4;PSMA4;UBA7;PSMD2;PSME2;PSME3;PSMD7;PSMC1;PSMD4;PSMD9;PSMD3;PSMB9;PSMD6;PSMB1;RPN1;PSMA5;UBE2D1;UBA1;PSMC6;PSMD13;PSMD12;PSMD11;RPN2;PSMA3;PSMB2;UBE2D2	Astro
1172	GO_Molecular_Function_2023__Voltage-Gated Monoatomic Ion Channel Activity (GO:0005244)	-0.442406	-1.96464	0.00778816	0.0309818	0.99	14/22	27.86%	KCND2;GRIN1;GRIN3A;KCNA3;CACNA1H;SCN1A;GRIN2B;GRIN2A;HCN1;KCNJ8;CACNA1E;GRIN2D;GRIN2C;VDAC2	Astro
1173	GO_Biological_Process_2023__Response To Fibroblast Growth Factor (GO:0071774)	-0.488443	-1.96456	0.00161551	0.0308595	0.99	9/17	12.17%	IER2;NR4A1;DLL4;EGR3;ZFP36L2;CCL5;SFRP1;NDNF;HYAL2	Astro
[truncated: 486 more rows]
