# Supplementary material for: Single-Cell Multi-Modal Differential Analysis of the Human Neo-Cortex in HIV Infection Reveals Similarities with Hallmarks of Alzheimer’s Disease
Source: Research Square preprint supplement (doi:10.21203/rs.3.rs-7636879/v1), 2025-11-01
Supplement: Supplementary file 4 [file 7b58ffed7a057756cee63ae0.xlsx]

## Sheet: Sheet1
	cd4_counts	cognitive_status	brain_pathology	spinal_cord_pathology	antiretroviral_therapy	sex	viral_status
0	400	Unable to reliably assign neurocognitive diagnosis	Atherosclerosis of major brain arteries, Neurofibrillary pathology (H & E or follow up stain), Optic nerve atrophy/degeneration, Other non-infectious pathology, Vascular siderocalcinosis	Descending fiber tract degeneration, Gracile tract atrophy (ascending tract degeneration)	DRV; RGV; RTV; TMC	male	HIV_positive
1	598	Probable Mild Neurocognitive disorder	Atherosclerosis of major brain arteries, Hemorrhage-dura or leptomeninges, Other non-infectious pathology, Vascular siderocalcinosis	Spinal cord normal	3TC; ABC; DTG	female	HIV_positive
2	305	Neuropsychological Impairment - Other cause	Arteriolar wall thickening suggestive of chronic hypertension, Neurofibrillary pathology (H & E or follow up stain), Other non-infectious pathology, Senile plaque (H & E or follow up stain), Vascular siderocalcinosis	Spinal cord normal	BIK	female	HIV_positive
3	172	Neuropsychological Impairment - Other cause	Arteriolar wall thickening suggestive of chronic hypertension, Atherosclerosis of major brain arteries, Focal (territorial) infarct, Hypoxic or ischemic damage, Neurofibrillary pathology (H & E or follow up stain), Other non-infectious pathology	Spinal cord normal	DTG; TRU	male	HIV_positive
4	33	Probable HAD	Alzheimer type 2 gliosis, Hypoxic or ischemic damage, Minimal non-diagnostic abnormalities	Spinal cord normal	NONE; NONE	male	HIV_positive
5	60	Neuropsychological Impairment; does not meet criteria for syndromic disorder	Minimal non-diagnostic abnormalities	Spinal cord normal	3TC; ABC; KTA; ZDV; 3TC; ABC; KTA; ZDV	male	HIV_positive
6	not_known	not_known	Alzheimer type 2 gliosis	Spinal cord normal	not_known	male	HIV_positive
7	20	Neuropsychological Impairment or dementia due to other cause	Atherosclerosis of major brain arteries	Spinal cord normal	ATV; TRU; ATV; TRU; ATR; ATR	male	HIV_positive
8	20	not_known	Bacterial parenchymal infection, Focal (territorial) infarct	Spinal cord normal	EPZ; FPV; RTV; EPZ; FPV; RTV; DRV; TRU; DRV; TRU;;	male	HIV_positive
9	11	Test not done	Focal (territorial) infarct, Other non-infectious pathology, Thrombus or thromboembolus	Gracile tract atrophy (ascending tract degeneration)	NONE; NONE	male	HIV_positive
10	8	Test not done	Focal (territorial) infarct	Gracile tract atrophy (ascending tract degeneration)	NONE; NONE	male	HIV_positive
11	298	Test not done	Contusion, Focal (territorial) infarct, Optic nerve atrophy/degeneration	Spinal cord normal	ATV; EFV; RTV; TRU; ATV; EFV; RTV; TRU	female	HIV_positive
12	259	Neuropsychological Impairment or dementia due to other cause	Brain Normal	Gracile tract atrophy (ascending tract degeneration)	NONE; NONE	female	HIV_positive
