# Supplementary material for: Single-Cell Multi-Modal Differential Analysis of the Human Neo-Cortex in HIV Infection Reveals Similarities with Hallmarks of Alzheimer’s Disease
Source: Research Square preprint supplement (doi:10.21203/rs.3.rs-7636879/v1), 2025-11-01
Supplement: Supplementary file 5 [file a3b798f344692e2c3843ee65.xlsx]

## Sheet: Sheet1
	Term	ES	NES	NOM p-val	FDR q-val	FWER p-val	Tag %	Gene %	Lead_genes	cell_type
0	KEGG_2021_Human__Ribosome	-0.589199	-4.9502	0	0	0	106/129	28.25%	MRPL36;MRPL28;MRPL16;MRPL24;MRPL17;RPS26;RPS28;RPL18A;MRPS12;RPL3;RPS16;FAU;RPS13;RPL10A;RPS15;RPS4X;RPS27A;RPL7A;RPL41;MRPS2;RPL19;RPL23;RPL13A;MRPL11;MRPL34;RPL26;MRPL23;RPL9;RSL24D1;RPS12;RPL36AL;RPS17;RPS6;MRPL14;RPL35A;RPL8;MRPL12;RPS18;MRPS7;RPS21;RPL18;MRPL27;RPL29;RPS11;RPL10;RPLP2;RPL35;RPS14;RPLP1;RPL36;MRPL2;RPL12;MRPS17;RPLP0;RPL15;RPS25;RPS7;RPS27;MRPL9;RPS3A;RPL24;RPL32;RPS23;RPL22L…	L5-6NP
1	GO_Biological_Process_2023__Cytoplasmic Translation (GO:0002181)	-0.598997	-4.54625	0	0	0	77/92	28.25%	RPS26;RPS28;RPL18A;MRPS12;RPL3;RPS16;FAU;RPS13;RPL10A;RPS15;RPS4X;RPS27A;RPL7A;RPL41;RPL19;RPL13A;RPL26;RPL9;RPL36AL;RPS17;RPS6;RPL35A;RPL8;RPS18;RPS21;RPL18;RPL29;RPS11;RACK1;RPL10;RPLP2;RPL35;RPS14;RPLP1;RPL36;RPL12;RPLP0;RPL15;RPS25;RPS7;RPS27;RPS3A;RPL24;RPL32;RPS23;RPL22L1;RPL21;RPS5;EIF4A2;RPL11;RPL4;RPL23A;RPL28;RPL38;RPS19;RPL5;RPL13;RPL26L1;UBA52;RPS10;RPS9;RPS15A;RPL6;RPL39;RPL34;RPL7;R…	L5-6NP
2	WikiPathway_2023_Human__Cytoplasmic Ribosomal Proteins WP477	-0.605882	-4.51515	0	0	0	73/87	28.25%	RPS26;RPS28;RPL18A;RPL3;RPS16;FAU;RPS13;RPL10A;RPS15;RPS4X;RPS27A;RPL7A;RPL41;RPL19;RPL23;RPL13A;RPL26;RPL9;RPS12;RPS17;RPS6;RPL35A;RPL8;RPS18;RPS21;RPL18;RPL29;RPS11;RPL10;RPLP2;RPL35;RPS14;RPLP1;RPL36;RPL12;RPLP0;RPL15;RPS25;RPS7;RPS27;RPS3A;RPL24;RPL32;RPS23;RPL21;RPL36A;RPS5;RPL11;RPL4;RPL23A;RPL28;RPL38;RPS19;RPL5;RPL13;UBA52;RPS10;RPS9;RPS15A;RPL6;RPL39;RPL34;RPL7;RPS4Y1;RPSA;RPL14;RPS2;RPL…	L5-6NP
3	GO_Biological_Process_2023__Peptide Biosynthetic Process (GO:0043043)	-0.511326	-4.41566	0	0	0	107/144	29.82%	CARNS1;MRPL36;MRPL28;MRPL24;RPS26;RPS28;RPL18A;MRPS12;RPL3;MRPL55;RPS16;FAU;RPS13;RPL10A;RPS15;RPS4X;RPS27A;RPL7A;RPL41;MRPL51;RPL19;RPL13A;MRPL11;MRPL34;RPL26;MRPL23;RPL9;RPL36AL;RPS17;RPS6;MRPL14;RPL35A;GGTA1;RPL8;MRPL12;RPS18;MRPS7;RPS21;RPL18;MRPL27;MRPL52;RPL29;DHPS;RPS11;RPL10;RPLP2;RPL35;MRPS33;RPS14;RPLP1;RPL36;RPL12;MRPS17;RPLP0;RPL15;RPS25;RPS7;RPS27;MRPL9;RPS3A;RPL24;RPL32;RPS23;RPL21;…	L5-6NP
4	GO_Biological_Process_2023__Macromolecule Biosynthetic Process (GO:0009059)	-0.453933	-4.06594	0	0	0	113/169	28.25%	MRPL36;MRPL28;MRPL24;RPS26;RPS28;RPL18A;MRPS12;RPL3;MRPL55;RPS16;FAU;RPS13;RPL10A;RPS15;RPS4X;RPS27A;RPL7A;RPL41;MRPL51;RPL19;TUFM;APOE;RPL13A;MRPL11;MRPL34;RPL26;MRPL23;RPL9;EEF1B2;RPL36AL;RPS17;RPS6;MRPL14;RPL35A;RPL8;MRPL12;RPS18;MRPS7;RPS21;RPL18;MRPL27;MRPL52;RPL29;B4GAT1;DHPS;RPS11;RPL10;RPLP2;RPL35;MRPS33;RPS14;RPLP1;RPL36;RPL12;MRPS17;RPLP0;RPL15;RPS25;RPS7;RPS27;MRPL9;RPS3A;EIF5A;RPL24;R…	L5-6NP
5	GO_Biological_Process_2023__Translation (GO:0006412)	-0.409138	-3.84853	0	0	0	134/222	28.25%	MRPL36;MRPL28;MRPL16;MRPL24;MRPL38;MRPL49;MRPL17;RPS26;RPS28;RPL18A;MRPS12;MRPS34;RPL3;MRPL54;MRPL55;CHCHD1;RPS16;FAU;RPS13;RPL10A;MRPS26;RPS15;RPS4X;RPS27A;RPL7A;RPL41;MRPS2;MRPL51;RPL19;AURKAIP1;TUFM;RPL13A;MRPL11;MRPL34;RPL26;MRPS28;MRPL23;RPL9;EEF1B2;RPL36AL;RPS17;RPS6;MRPL14;RPL35A;RPL8;MRPL12;RPS18;MRPS7;RPS21;RPL18;MRPL27;MRPL52;RPL29;DHPS;RPS11;RACK1;RPL10;RPLP2;RPL35;MRPS33;RPS14;RPLP1;R…	L5-6NP
6	GO_Cellular_Component_2023__Large Ribosomal Subunit (GO:0015934)	-0.622363	-3.84237	0	0	0	41/48	26.41%	RPL18A;RPL3;RPL10A;RPL7A;RPL41;RPL19;RPL13A;RPL26;RPL9;RPL36AL;RPL35A;RPL8;RPL18;RPL29;RPLP2;RPL35;RPLP1;RPL36;RPL12;RPLP0;RPL15;RPL24;RPL32;RPL21;RPL11;RPL4;RPL23A;RPL28;RPL38;RPL5;RPL13;RPL26L1;UBA52;RPL6;RPL39;RPL34;RPL7;RPL14;RPL27A;RPL27;RPL22	L5-6NP
7	GO_Cellular_Component_2023__Cytosolic Large Ribosomal Subunit (GO:0022625)	-0.622363	-3.84237	0	0	0	41/48	26.41%	RPL18A;RPL3;RPL10A;RPL7A;RPL41;RPL19;RPL13A;RPL26;RPL9;RPL36AL;RPL35A;RPL8;RPL18;RPL29;RPLP2;RPL35;RPLP1;RPL36;RPL12;RPLP0;RPL15;RPL24;RPL32;RPL21;RPL11;RPL4;RPL23A;RPL28;RPL38;RPL5;RPL13;RPL26L1;UBA52;RPL6;RPL39;RPL34;RPL7;RPL14;RPL27A;RPL27;RPL22	L5-6NP
8	WikiPathway_2023_Human__Electron Transport Chain OXPHOS System In Mitochondria WP111	-0.490597	-3.57923	0	0	0	66/87	33.65%	NDUFA2;SURF1;COX8A;SLC25A5;NDUFC2;NDUFA13;NDUFB10;NDUFB7;ATP5PO;NDUFS3;COX6A1;ATP5MC1;UQCR10;ATP5IF1;COX4I1;UQCRQ;NDUFB3;COX7C;COX5B;NDUFB8;ATP5MC3;ATP5F1D;NDUFA11;NDUFA1;UQCR11;COX7B;ATP5PF;SLC25A4;NDUFS7;NDUFA4;NDUFB2;ATP5F1E;NDUFA3;COX7A1;NDUFV2;ATP5MF;UQCRFS1;COX7A2;UQCRH;ATP5PD;NDUFA6;COX5A;UQCRB;COX6B1;ATP5ME;NDUFB9;NDUFS6;NDUFS5;COX15;NDUFS8;NDUFC1;ATP5F1B;NDUFV1;NDUFS2;NDUFA8;NDUFAB1;SDHD…	L5-6NP
9	GO_Cellular_Component_2023__Small Ribosomal Subunit (GO:0015935)	-0.630222	-3.56901	0	0	0	33/38	27.59%	RPS26;RPS28;MRPS12;RPS16;FAU;RPS13;RPS15;RPS4X;RPS27A;RPS17;RPS6;RPS18;RPS21;RPS11;RACK1;RPS14;RPS25;RPS7;RPS27;RPS3A;RPS23;RPS5;MRPS6;RPS19;UBA52;RPS10;RPS9;RPS15A;RPS4Y1;RPSA;RPS2;RPS24;RPS8	L5-6NP
10	GO_Cellular_Component_2023__Cytosolic Small Ribosomal Subunit (GO:0022627)	-0.627599	-3.52932	0	0	0	32/37	27.59%	RPS26;RPS28;MRPS12;RPS16;FAU;RPS13;RPS15;RPS4X;RPS27A;RPS17;RPS6;RPS18;RPS21;RPS11;RACK1;RPS14;RPS25;RPS7;RPS27;RPS3A;RPS23;RPS5;RPS19;UBA52;RPS10;RPS9;RPS15A;RPS4Y1;RPSA;RPS2;RPS24;RPS8	L5-6NP
11	GO_Biological_Process_2023__Mitochondrial ATP Synthesis Coupled Electron Transport (GO:0042775)	-0.518889	-3.52649	0	0	0	51/64	33.65%	NDUFA2;COX8A;NDUFC2;NDUFB10;NDUFB7;NDUFS3;COX6A1;CYC1;UQCC3;UQCR10;COX4I1;UQCRQ;NDUFB3;COX7C;COX5B;NDUFB8;NDUFA1;UQCR11;COX7B;NDUFS7;NDUFA4;NDUFB2;NDUFA3;NDUFV2;COA6;UQCRFS1;COX7A2;UQCRH;NDUFA6;COX5A;UQCRB;COX6B1;NDUFB9;NDUFS6;NDUFS5;COX15;NDUFS8;NDUFC1;NDUFV1;NDUFS2;NDUFA8;NDUFAB1;SDHD;NDUFB1;NDUFB5;CYCS;UQCRC1;NDUFAF1;NDUFB4;NDUFB6;NDUFA9	L5-6NP
12	GO_Biological_Process_2023__Aerobic Electron Transport Chain (GO:0019646)	-0.523712	-3.50617	0	0	0	50/62	33.65%	NDUFA2;COX8A;NDUFC2;NDUFB10;NDUFB7;NDUFS3;COX6A1;CYC1;UQCC3;UQCR10;COX4I1;UQCRQ;NDUFB3;COX7C;COX5B;NDUFB8;NDUFA1;UQCR11;COX7B;NDUFS7;NDUFA4;NDUFB2;NDUFA3;NDUFV2;UQCRFS1;COX7A2;UQCRH;NDUFA6;COX5A;UQCRB;COX6B1;NDUFB9;NDUFS6;NDUFS5;COX15;NDUFS8;NDUFC1;NDUFV1;NDUFS2;NDUFA8;NDUFAB1;SDHD;NDUFB1;NDUFB5;CYCS;UQCRC1;NDUFAF1;NDUFB4;NDUFB6;NDUFA9	L5-6NP
13	GO_Molecular_Function_2023__Oxidoreduction-Driven Active Transmembrane Transporter Activity (GO:0015453)	-0.556003	-3.50468	0	0	0	42/50	33.65%	NDUFA2;CYB561D2;COX8A;NDUFC2;NDUFB10;NDUFB7;NDUFS3;CYBRD1;UQCR10;COX4I1;NDUFB3;COX7C;COX5B;NDUFB8;NDUFA1;COX7B;NDUFS7;NDUFA4;NDUFB2;NDUFA3;COX7A1;NDUFV2;UQCRH;NDUFA6;COX5A;UQCRB;COX6B1;NDUFB9;NDUFS6;NDUFS5;NDUFS8;NDUFC1;NDUFV1;NDUFS2;NDUFA8;NDUFB1;NDUFB5;UQCRC1;NDUFB4;CYB561A3;NDUFB6;NDUFA9	L5-6NP
14	GO_Cellular_Component_2023__Ribosome (GO:0005840)	-0.537964	-3.47598	0	0	0	37/57	21.02%	RPS26;RPS28;RPL18A;MRPS12;RPS13;RPL10A;RPS4X;RPL7A;RPL41;RPL19;RPL13A;RPL9;RPL36AL;RPS17;RPL8;RPS18;MRPS7;RPS21;RPL18;RPS11;RPL36;RPL15;RPS25;RPS7;BTF3;RPS27;RPL24;RPL32;RPS23;RPS5;RPL11;RPL38;RPS19;RPS10;RPS9;RPL6;RPL39	L5-6NP
15	KEGG_2021_Human__Coronavirus disease	-0.379926	-3.36964	0	0	0	90/167	22.91%	SYK;C1QB;TLR4;C3;FOS;EGFR;RPS26;RPS28;RPL18A;PLCG2;IFIH1;RPL3;RPS16;FAU;RPS13;RPL10A;RPS15;RPS4X;RPS27A;RPL7A;NRP1;RPL41;RPL19;RPL23;RPL13A;IRF3;RPL26;RPL9;CASP1;RSL24D1;RPS12;RPL36AL;RPS17;RPS6;RPL35A;RPL8;OAS2;RPS18;RPS21;RPL18;RPL29;CFD;RPS11;RPL10;RPLP2;RPL35;RPS14;RPLP1;RPL36;RPL12;RPLP0;RPL15;RPS25;RPS7;RPS27;RPS3A;RPL24;RPL32;MAPK11;RPS23;RPL22L1;RPL21;RPL36A;RPS5;RPL11;RPL4;RPL23A;RPL28;C…	L5-6NP
16	GO_Biological_Process_2023__Proton Motive Force-Driven ATP Synthesis (GO:0015986)	-0.515576	-3.36859	0	0	0	46/58	33.65%	NDUFA2;NDUFB11;NDUFC2;NDUFA13;NDUFB10;NDUFB7;ATP5PO;NDUFS3;ATP5MC1;NDUFB3;NDUFB8;ATP5MC3;ATP5F1D;NDUFA11;NDUFA1;ATP5PF;NDUFS7;NDUFB2;ATP5F1E;NDUFA3;NDUFV2;ATP5MF;ATP5PD;NDUFA6;ATP5MGL;ATP5ME;NDUFB9;NDUFS6;NDUFS5;ATP5MK;NDUFS8;ATP5MJ;NDUFC1;ATP5F1B;NDUFV1;NDUFS2;NDUFA8;NDUFAB1;SDHD;NDUFB1;NDUFB5;ATP5PB;ATP5MG;NDUFB4;NDUFB6;NDUFA9	L5-6NP
17	WikiPathway_2023_Human__Oxidative Phosphorylation WP623	-0.536664	-3.3312	0	0	0	44/50	38.19%	NDUFA2;NDUFC2;NDUFB10;NDUFB7;ATP5PO;NDUFS3;ATP5MC1;NDUFB8;ATP5MC3;ATP5F1D;NDUFA11;ATP5PF;NDUFS7;NDUFA4;NDUFB2;ATP5F1E;NDUFA3;NDUFV2;ATP5MF;ATP6AP1;ATP5PD;NDUFA6;ATP5ME;NDUFB9;NDUFS6;NDUFS5;NDUFS8;NDUFC1;ATP6AP2;ATP5F1B;NDUFV1;NDUFS2;NDUFA8;NDUFAB1;NDUFB1;NDUFB5;ATP5PB;ATP5MG;NDUFB4;NDUFB6;NDUFA9;ATP5F1A;ATP5MC2;NDUFA5	L5-6NP
18	GO_Biological_Process_2023__Proton Motive Force-Driven Mitochondrial ATP Synthesis (GO:0042776)	-0.525588	-3.30118	0	0	0	41/51	33.65%	NDUFA2;NDUFB11;NDUFC2;NDUFA13;NDUFB10;NDUFB7;ATP5PO;NDUFS3;NDUFB3;NDUFB8;ATP5F1D;NDUFA11;NDUFA1;ATP5PF;NDUFS7;NDUFB2;ATP5F1E;NDUFA3;NDUFV2;ATP5MF;ATP5PD;NDUFA6;ATP5ME;NDUFB9;NDUFS6;NDUFS5;NDUFS8;NDUFC1;ATP5F1B;NDUFV1;NDUFS2;NDUFA8;NDUFAB1;SDHD;NDUFB1;NDUFB5;ATP5PB;ATP5MG;NDUFB4;NDUFB6;NDUFA9	L5-6NP
19	GO_Cellular_Component_2023__Mitochondrial Inner Membrane (GO:0005743)	-0.327328	-3.30103	0	0	0	185/334	31.82%	ENDOG;NDUFA2;NDUFB11;PRODH;COX8A;SLC25A5;NDUFC2;MRPL36;NDUFA13;MRPL28;MRPL16;NDUFB10;MRPL24;CHDH;SLC25A18;CCDC51;NDUFB7;SCO2;ATP5PO;NDUFS3;MRPL38;COX6A1;MRPL49;SLC25A1;TMEM160;CPT2;MRPL17;TIMM10;MRPS12;NDUFAF3;CYC1;BCS1L;ATP5MC1;MRPS34;UQCC3;COA3;MRPL54;MRPL55;UQCR10;CHCHD1;MRPS26;EFHD1;COX4I1;MRPS2;MRPL51;AURKAIP1;UQCRQ;LDHB;MRPL11;NDUFB3;MICOS13;COX7C;MRPL34;SMDT1;MRPS28;TIMM13;MRPL23;COX5B;NDU…	L5-6NP
20	GO_Cellular_Component_2023__Organelle Inner Membrane (GO:0019866)	-0.319253	-3.26836	0	0	0	192/353	31.82%	ENDOG;NDUFA2;NDUFB11;PRODH;COX8A;SLC25A5;NDUFC2;MRPL36;NDUFA13;MRPL28;MRPL16;NDUFB10;MRPL24;CHDH;SLC25A18;CCDC51;NDUFB7;SCO2;ATP5PO;NDUFS3;MRPL38;COX6A1;MRPL49;SLC25A1;TMEM160;CPT2;MRPL17;TIMM10;MRPS12;NDUFAF3;CYC1;BCS1L;ATP5MC1;MRPS34;UQCC3;COA3;MRPL54;MRPL55;UQCR10;CHCHD1;MRPS26;EFHD1;COX4I1;MRPS2;MRPL51;AURKAIP1;UQCRQ;LDHB;MRPL11;NDUFB3;MICOS13;COX7C;MRPL34;SMDT1;MRPS28;TIMM13;MRPL23;COX5B;NDU…	L5-6NP
21	GO_Biological_Process_2023__Oxidative Phosphorylation (GO:0006119)	-0.495548	-3.26564	0	0	0	45/59	33.65%	NDUFA2;NDUFB11;NDUFC2;NDUFA13;NDUFB10;NDUFB7;ATP5PO;NDUFS3;CHCHD10;NDUFB3;NDUFB8;ATP5F1D;NDUFA11;NDUFA1;ATP5PF;NDUFS7;NDUFB2;ATP5F1E;NDUFA3;NDUFV2;ATP5MF;UQCRH;ATP5PD;NDUFA6;UQCRB;ATP5ME;NDUFB9;NDUFS6;NDUFS5;NDUFS8;NDUFC1;ATP5F1B;NDUFV1;NDUFS2;NDUFA8;NDUFAB1;SDHD;NDUFB1;NDUFB5;ATP5PB;UQCRC1;ATP5MG;NDUFB4;NDUFB6;NDUFA9	L5-6NP
22	KEGG_2021_Human__Oxidative phosphorylation	-0.417996	-3.2435	0	0	0	86/105	44.68%	NDUFA2;NDUFB11;COX8A;ATP6V1F;NDUFC2;NDUFA13;NDUFB10;NDUFB7;ATP5PO;NDUFS3;COX6A1;CYC1;ATP5MC1;UQCR10;COX4I1;ATP6V0B;UQCRQ;NDUFB3;COX7C;COX5B;NDUFB8;ATP5MC3;ATP5F1D;NDUFA11;NDUFA1;UQCR11;COX7B;ATP5PF;ATP6V1G2;NDUFS7;NDUFA4;NDUFB2;ATP5F1E;NDUFA3;COX7A1;NDUFV2;ATP5MF;UQCRFS1;COX7A2;ATP6AP1;UQCRH;ATP5PD;NDUFA6;COX5A;UQCRB;COX6B1;ATP5ME;NDUFB9;NDUFS6;NDUFS5;COX15;NDUFS8;NDUFC1;ATP5F1B;NDUFV1;NDUFS2;NDU…	L5-6NP
23	MSigDB_Hallmark_2020__Oxidative Phosphorylation	-0.357967	-3.22924	0	0	0	134/193	41.16%	NDUFA2;SURF1;COX8A;ATP6V1F;SLC25A5;NDUFC2;PDK4;NDUFB7;ATP5PO;NDUFS3;COX6A1;TIMM10;MRPS12;CYC1;HSD17B10;ATP5MC1;UQCR10;ETFB;TIMM8B;TOMM22;ECH1;COX4I1;ATP6V0B;UQCRQ;LDHB;MRPL11;GPX4;NDUFB3;COX7C;MRPL34;TIMM13;COX5B;NDUFB8;IDH3G;ATP5MC3;ATP5F1D;NDUFA1;HTRA2;PHB2;GRPEL1;UQCR11;COX7B;ATP5PF;SLC25A4;NDUFS7;NDUFA4;MDH2;SLC25A11;NDUFB2;ATP5F1E;IDH3B;NDUFA3;BAX;BDH2;NDUFV2;ATP5MF;UQCRFS1;MRPL35;COX7A2;ATP…	L5-6NP
24	GO_Biological_Process_2023__Cellular Respiration (GO:0045333)	-0.444723	-3.20782	0	0	0	58/82	33.65%	NDUFA2;NDUFB11;SURF1;COX8A;NDUFC2;NDUFA13;NDUFB10;NDUFB7;NDUFS3;COX6A1;CYC1;BLOC1S1;UQCR10;ETFB;COX4I1;UQCRQ;NDUFB3;COX7C;COX5B;NDUFB8;MTLN;NDUFA11;NDUFA1;CHCHD5;UQCR11;COX7B;NDUFS7;NDUFA4;MDH2;NDUFB2;NDUFA3;NDUFV2;UQCRFS1;COX7A2;UQCRH;NDUFA6;COX5A;UQCRB;COX6B1;NDUFB9;NDUFS6;NDUFS5;COX15;NDUFS8;NDUFC1;NDUFV1;NDUFS2;NDUFA8;NDUFAB1;MTFR1;NDUFB1;NDUFB5;CYCS;UQCRC1;NDUFB4;MTFR1L;NDUFB6;NDUFA9	L5-6NP
25	GO_Biological_Process_2023__Mitochondrial Electron Transport, NADH To Ubiquinone (GO:0006120)	-0.56614	-3.04383	0	0	0	28/33	33.65%	NDUFA2;NDUFC2;NDUFB10;NDUFB7;NDUFS3;NDUFB3;NDUFB8;NDUFS7;NDUFA4;NDUFB2;NDUFA3;NDUFV2;NDUFA6;NDUFB9;NDUFS6;NDUFS5;NDUFS8;NDUFC1;NDUFV1;NDUFS2;NDUFA8;NDUFAB1;NDUFB1;NDUFB5;NDUFAF1;NDUFB4;NDUFB6;NDUFA9	L5-6NP
26	GO_Cellular_Component_2023__Respiratory Chain Complex I (GO:0045271)	-0.515908	-2.99909	0	0	0	32/40	33.65%	NDUFA2;NDUFB11;NDUFC2;NDUFA13;NDUFB10;NDUFB7;NDUFS3;NDUFB3;NDUFB8;NDUFA11;NDUFA1;NDUFS7;NDUFA4;NDUFB2;NDUFA3;NDUFV2;NDUFA6;NDUFB9;NDUFS6;NDUFS5;NDUFS8;NDUFC1;NDUFV1;NDUFS2;NDUFA8;NDUFAB1;NDUFB1;NDUFB5;NDUFAF1;NDUFB4;NDUFB6;NDUFA9	L5-6NP
27	GO_Cellular_Component_2023__Mitochondrial Respiratory Chain Complex I (GO:0005747)	-0.515908	-2.99909	0	0	0	32/40	33.65%	NDUFA2;NDUFB11;NDUFC2;NDUFA13;NDUFB10;NDUFB7;NDUFS3;NDUFB3;NDUFB8;NDUFA11;NDUFA1;NDUFS7;NDUFA4;NDUFB2;NDUFA3;NDUFV2;NDUFA6;NDUFB9;NDUFS6;NDUFS5;NDUFS8;NDUFC1;NDUFV1;NDUFS2;NDUFA8;NDUFAB1;NDUFB1;NDUFB5;NDUFAF1;NDUFB4;NDUFB6;NDUFA9	L5-6NP
28	GO_Biological_Process_2023__Mitochondrial Respiratory Chain Complex Assembly (GO:0033108)	-0.402477	-2.94741	0	0	0	59/87	35.89%	PET117;NDUFA2;NDUFB11;SURF1;NDUFC2;NDUFA13;NDUFB10;NDUFB7;SCO2;NDUFS3;COX14;NDUFAF3;BCS1L;UQCC3;COA3;CHCHD4;TMEM126A;PET100;SDHAF1;NDUFB3;NDUFB8;NDUFAF8;NDUFA11;NDUFA1;DMAC2;CHCHD7;NDUFS7;TMEM223;NDUFB2;TMEM186;NDUFA3;UQCRFS1;NDUFA6;NDUFAF4;COA8;NDUFB9;NDUFS5;NDUFS8;DMAC1;NDUFC1;COX20;NDUFS2;NDUFA8;SDHAF3;TMEM126B;NDUFAB1;NDUFB1;NDUFB5;UQCC2;NDUFAF1;COX18;COX17;NDUFB4;NDUFB6;NDUFA9;ECSIT;AIFM1;FO…	L5-6NP
29	GO_Molecular_Function_2023__NADH Dehydrogenase (Quinone) Activity (GO:0050136)	-0.542641	-2.94398	0	0	0	27/33	33.65%	NDUFA2;NDUFC2;NDUFB10;NDUFB7;NDUFS3;NDUFB3;NDUFB8;NDUFS7;NDUFA4;NDUFB2;NDUFA3;NDUFV2;NDUFA6;NQO1;NDUFB9;NDUFS6;NDUFS5;NDUFS8;NDUFC1;NDUFV1;NDUFS2;NDUFA8;NDUFB1;NDUFB5;NDUFB4;NDUFB6;NDUFA9	L5-6NP
30	GO_Cellular_Component_2023__Polysomal Ribosome (GO:0042788)	-0.595654	-2.94094	0	0	0	19/27	21.02%	RPS26;RPS28;RPL18A;RPL10A;RPL7A;RPL41;RPL19;RPL36AL;RPL8;RPS21;RPL18;RPL36;RPL24;RPL32;RPS23;RPL11;RPL38;RPL6;RPL39	L5-6NP
31	KEGG_2021_Human__Prion disease	-0.310332	-2.93363	0	0	0	124/224	34.12%	C1QB;NDUFA2;NDUFB11;COX8A;NOTCH1;SLC25A5;NDUFC2;ADRM1;NDUFA13;NDUFB10;NDUFB7;ATP5PO;CREB3L3;NDUFS3;PSMB6;COX6A1;CAV1;CAV2;HSPA2;TUBB6;CYC1;CAV3;HSPA1L;ATP5MC1;PPIF;TUBA4A;CYBA;UQCR10;TUBB2A;COX4I1;CACNA1F;GRIN2C;UQCRQ;PSMC3;NDUFB3;COX7C;COX5B;NDUFB8;ATP5MC3;ATP5F1D;NDUFA11;NDUFA1;CREB3L1;HSPA1A;PSMD8;TUBB4B;CREB3;TUBA1B;SOD1;UQCR11;COX7B;ATP5PF;SLC25A4;NDUFS7;NDUFA4;TUBB4A;NDUFB2;PSMA7;TUBA1A;ATP…	L5-6NP
32	GO_Biological_Process_2023__Mitochondrial Respiratory Chain Complex I Assembly (GO:0032981)	-0.467443	-2.92253	0	3.23148e-05	0.001	39/53	35.83%	NDUFA2;NDUFB11;NDUFC2;NDUFA13;NDUFB10;NDUFB7;NDUFS3;NDUFAF3;BCS1L;TMEM126A;NDUFB3;NDUFB8;NDUFAF8;NDUFA11;NDUFA1;DMAC2;NDUFS7;NDUFB2;TMEM186;NDUFA3;NDUFA6;NDUFAF4;NDUFB9;NDUFS5;NDUFS8;DMAC1;NDUFC1;NDUFS2;NDUFA8;TMEM126B;NDUFAB1;NDUFB1;NDUFB5;NDUFAF1;NDUFB4;NDUFB6;NDUFA9;ECSIT;FOXRED1	L5-6NP
33	GO_Biological_Process_2023__NADH Dehydrogenase Complex Assembly (GO:0010257)	-0.467443	-2.92253	0	3.23148e-05	0.001	39/53	35.83%	NDUFA2;NDUFB11;NDUFC2;NDUFA13;NDUFB10;NDUFB7;NDUFS3;NDUFAF3;BCS1L;TMEM126A;NDUFB3;NDUFB8;NDUFAF8;NDUFA11;NDUFA1;DMAC2;NDUFS7;NDUFB2;TMEM186;NDUFA3;NDUFA6;NDUFAF4;NDUFB9;NDUFS5;NDUFS8;DMAC1;NDUFC1;NDUFS2;NDUFA8;TMEM126B;NDUFAB1;NDUFB1;NDUFB5;NDUFAF1;NDUFB4;NDUFB6;NDUFA9;ECSIT;FOXRED1	L5-6NP
34	GO_Molecular_Function_2023__NADH Dehydrogenase (Ubiquinone) Activity (GO:0008137)	-0.538653	-2.87923	0	3.13915e-05	0.001	26/32	33.65%	NDUFA2;NDUFC2;NDUFB10;NDUFB7;NDUFS3;NDUFB3;NDUFB8;NDUFS7;NDUFA4;NDUFB2;NDUFA3;NDUFV2;NDUFA6;NDUFB9;NDUFS6;NDUFS5;NDUFS8;NDUFC1;NDUFV1;NDUFS2;NDUFA8;NDUFB1;NDUFB5;NDUFB4;NDUFB6;NDUFA9	L5-6NP
35	KEGG_2021_Human__Parkinson disease	-0.308397	-2.87622	0	3.05195e-05	0.001	154/211	46.88%	NDUFA2;NDUFB11;COX8A;SLC25A5;NDUFC2;ADRM1;NDUFA13;NDUFB10;NDUFB7;ATP5PO;NDUFS3;PSMB6;COX6A1;TUBB6;CYC1;ATP5MC1;UBB;PPIF;TUBA4A;UQCR10;TUBB2A;RPS27A;COX4I1;SEPTIN5;UBC;UQCRQ;PSMC3;NDUFB3;COX7C;COX5B;NDUFB8;ATP5MC3;ATP5F1D;UBE2L6;NDUFA11;NDUFA1;PSMD8;TUBB4B;HTRA2;TUBA1B;UQCR11;DRD1;COX7B;ATP5PF;SLC25A4;NDUFS7;NDUFA4;DAXX;TUBB4A;NDUFB2;PSMA7;TUBA1A;ATP5F1E;NDUFA3;BAX;COX7A1;ITPR3;GPR37;PSMC5;ADCY5;T…	L5-6NP
36	GO_Biological_Process_2023__Aerobic Respiration (GO:0009060)	-0.441657	-2.86648	0	2.96947e-05	0.001	40/57	33.65%	NDUFA2;NDUFB11;SURF1;NDUFC2;NDUFA13;NDUFB10;NDUFB7;NDUFS3;CHCHD10;BLOC1S1;NDUFB3;NDUFB8;ATP5F1D;NDUFA11;NDUFA1;NDUFS7;MDH2;NDUFB2;NDUFA3;NDUFV2;UQCRH;NDUFA6;UQCRB;NDUFB9;NDUFS6;NDUFS5;NDUFS8;NDUFC1;NDUFV1;NDUFS2;NDUFA8;NDUFAB1;MTFR1;NDUFB1;NDUFB5;UQCRC1;NDUFB4;MTFR1L;NDUFB6;NDUFA9	L5-6NP
37	GO_Molecular_Function_2023__Olfactory Receptor Activity (GO:0004984)	0.559047	2.86512	0	0.00169582	0.002	18/23	21.70%	OR3A1;OR51M1;OR56B2P;OR13A1;OR51B5;OR3A2;OR56B1;OR9Q1;OR10AC1;OR2AJ1;OR2M4;OR1B1;OR2M2;OR2L13;OR2L2;OR2M3;OR1F1;OR2L3	L5-6NP
38	MSigDB_Hallmark_2020__Myc Targets V1	-0.312828	-2.86008	0	5.78265e-05	0.002	145/192	49.00%	RRP9;NHP2;POLE3;CYC1;MCM7;SRM;NME1;NOP16;CCT7;TUFM;MRPL23;EEF1B2;RPS6;HSPE1;PSMD8;RPL18;TRIM28;H2AZ1;PHB2;SNRPG;RACK1;RPLP0;SNRPD2;ILF2;MAD2L1;RAN;MRPL9;PSMA7;C1QBP;LSM7;RANBP1;PCBP1;RPS5;PPIA;FBL;PRPF31;SNRPA;NOP56;RPS10;PCNA;COX5A;POLD2;HSP90AB1;RPL6;VBP1;RFC4;RPL34;LDHA;LSM2;RPL14;MCM4;SET;RPS2;SNRPD1;EIF4A1;PA2G4;IFRD1;CTPS1;PSMD3;RSL1D1;RPL22;NOLC1;RUVBL2;TCP1;NDUFAB1;DEK;EIF4G2;MRPS18B;PSMA…	L5-6NP
39	WikiPathway_2023_Human__Mitochondrial Complex I Assembly Model OXPHOS System WP4324	-0.467602	-2.85895	0	5.63437e-05	0.002	36/49	35.83%	NDUFA2;NDUFB11;NDUFC2;NDUFA13;NDUFB10;NDUFB7;NDUFS3;NDUFAF3;NDUFB3;NDUFB8;NDUFA1;DMAC2;NDUFB2;TMEM186;NDUFA3;NDUFV2;NDUFA6;NDUFAF4;NDUFB9;NDUFS6;NDUFS5;DMAC1;NDUFC1;NDUFV1;TMEM70;NDUFS2;NDUFA8;TMEM126B;NDUFAB1;NDUFB1;NDUFB5;NDUFAF1;NDUFB4;NDUFB6;ECSIT;FOXRED1	L5-6NP
40	GO_Biological_Process_2023__Gene Expression (GO:0010467)	-0.284556	-2.81556	0	5.49351e-05	0.002	161/274	39.30%	NOX4;CASP10;LMF2;MRPL36;PRPH2;MRPL28;MRPL24;ADARB2;TSPAN15;RPS26;RPS28;RPL18A;MRPS12;RPL3;MRPL55;RPS16;FAU;RPS13;RPL10A;EXOSC4;RPS15;RPS4X;RPS27A;RPL7A;RPL41;MRPL51;RPL19;RPL13A;MRPL11;MRPL34;RPL26;NXT1;MRPL23;RPL9;CASP1;M1AP;RPL36AL;RPS17;RPS6;MRPL14;RPL35A;RPL8;MRPL12;RPS18;MRPS7;RPS21;RPL18;MRPL27;ZNF830;MRPL52;RPL29;EXOSC5;DHPS;RPS11;RPL10;RPLP2;RPL35;MRPS33;RPS14;RPLP1;RPL36;RPL12;MRPS17;RPL…	L5-6NP
41	GO_Cellular_Component_2023__Mitochondrial Membrane (GO:0031966)	-0.259737	-2.7932	0	5.35953e-05	0.002	273/476	39.69%	ENDOG;NDUFA2;NDUFB11;PRODH;COX8A;SLC25A5;NDUFC2;MRPL36;NDUFA13;VRK2;MRPL28;MRPL16;NDUFB10;MRPL24;CHDH;SLC25A18;CCDC51;NDUFB7;SCO2;ATP5PO;NDUFS3;MRPL38;COX6A1;MRPL49;SLC25A1;TMEM160;CPT2;MRPL17;TIMM10;MRPS12;NDUFAF3;CYC1;BCS1L;ATP5MC1;UBB;MRPS34;UQCC3;COA3;MRPL54;MRPL55;UQCR10;CHCHD1;TOMM5;MTX1;TOMM22;MRPS26;RPS27A;EFHD1;COX4I1;MRPS2;IFI27L2;MRPL51;AURKAIP1;HAX1;TUFM;UQCRQ;LDHB;MRPL11;NDUFB3;MICOS…	L5-6NP
42	KEGG_2021_Human__Huntington disease	-0.283636	-2.77795	0	5.23192e-05	0.002	139/265	33.99%	ATG101;NDUFA2;NDUFB11;COX8A;SLC25A5;NDUFC2;POLR2I;GPX3;ADRM1;SLC1A3;NDUFA13;NDUFB10;NDUFB7;ATP5PO;CREB3L3;NDUFS3;PSMB6;COX6A1;POLR2K;REST;TUBB6;HAP1;POLR2J;CYC1;ATP5MC1;PPIF;TUBA4A;PLCB2;UQCR10;TUBB2A;DNAL4;COX4I1;DNAH5;UQCRQ;PSMC3;NDUFB3;COX7C;COX5B;DCTN3;NDUFB8;ATP5MC3;ATP5F1D;POLR2L;NDUFA11;NDUFA1;CREB3L1;PSMD8;TUBB4B;CREB3;TUBA1B;GPX7;SOD1;UQCR11;AP2M1;COX7B;ATP5PF;SLC25A4;NDUFS7;NDUFA4;TUBB4…	L5-6NP
43	KEGG_2021_Human__Diabetic cardiomyopathy	-0.315939	-2.73911	0	5.11025e-05	0.002	91/163	33.99%	NDUFA2;NDUFB11;COX8A;SLC25A5;NDUFC2;NDUFA13;PDK4;REN;NDUFB10;NDUFB7;ATP5PO;NDUFS3;PLN;COX6A1;CPT2;CYC1;ATP5MC1;PPIF;CYBA;PLCB2;UQCR10;COX4I1;UQCRQ;NDUFB3;COX7C;AGT;COX5B;NDUFB8;ATP5MC3;ATP5F1D;GAPDH;NDUFA11;NDUFA1;ATP2A3;ATP2A1;CTSD;UQCR11;COX7B;PPP1CA;ATP5PF;SLC25A4;NDUFS7;NDUFA4;NDUFB2;ATP5F1E;MAPK11;NDUFA3;COX7A1;NDUFV2;UQCRFS1;COX7A2;TGFBR1;TGFB1;UQCRH;ATP5PD;NDUFA6;COX5A;UQCRB;MAPK12;COX6B1;…	L5-6NP
44	GO_Biological_Process_2023__Mitochondrial Gene Expression (GO:0140053)	-0.357843	-2.73786	0	7.49116e-05	0.003	73/99	43.82%	MRPL36;MRPL28;MRPL16;MRPL24;MRPL38;MRPL49;MRPL17;MRPS12;MRPS34;MRPL54;MRPL55;CHCHD1;MRPS26;MRPS2;MRPL51;MRPL11;MRPL34;MRPS28;MRPL23;MRPL14;MRPL12;MRPS7;MRPL27;MRPL52;MRPS33;MRPL2;MRPS17;MRPL40;GADD45GIP1;MRPL57;MRPL9;MRPL18;MRPL58;MRPS6;MRPL4;MRPL43;MRPL35;POLRMT;MRPS18A;TBRG4;MRPS15;MTG1;MRPL44;MRPL30;MRPS10;FASTKD5;MRPL21;MRPL47;MRPL10;MRPS18B;MRPS11;FASTK;MRPL41;MRPS23;TFB2M;MRPL20;MRPL50;MRPS…	L5-6NP
45	KEGG_2021_Human__Thermogenesis	-0.295028	-2.69204	0	9.76625e-05	0.004	106/197	33.86%	NDUFA2;NDUFB11;COX8A;NDUFC2;NDUFA13;NDUFB10;NDUFB7;CNR1;ATP5PO;CREB3L3;NDUFS3;COX6A1;CPT2;DPF3;COX14;NDUFAF3;CYC1;ATP5MC1;COA3;UQCR10;ACSL5;COX4I1;MLST8;UQCRQ;NDUFB3;COX7C;COX5B;NDUFB8;ATP5MC3;ATP5F1D;PRDM16;RPS6;NDUFAF8;NDUFA11;NDUFA1;CREB3L1;CREB3;SIRT6;ADCY7;HRAS;UQCR11;COX7B;ATP5PF;NDUFS7;NDUFA4;NDUFB2;ATP5F1E;MAPK11;AKT1S1;NDUFA3;COX7A1;ADCY5;NDUFV2;ATP5MF;COA6;UQCRFS1;CREB5;COX7A2;COA4;UQCR…	L5-6NP
46	GO_Biological_Process_2023__Sensory Perception Of Smell (GO:0007608)	0.517738	2.66789	0	0.00678327	0.016	16/23	21.70%	OR51M1;CNGB1;OR51B5;SLC24A4;DRD2;OR9Q1;NXNL2;SYT10;OR10AC1;OR2AJ1;OR2M4;OR2M2;OR2L13;OR2L2;OR2M3;OR2L3	L5-6NP
47	GO_Biological_Process_2023__Mitochondrial Translation (GO:0032543)	-0.348424	-2.61403	0	0.000262733	0.011	69/95	43.82%	MRPL36;MRPL28;MRPL16;MRPL24;MRPL38;MRPL49;MRPL17;MRPS12;MRPS34;MRPL54;MRPL55;CHCHD1;MRPS26;MRPS2;MRPL51;TUFM;MRPL11;MRPL34;MRPS28;MRPL23;MRPL14;MRPL12;MRPS7;MRPL27;MRPL52;MRPS33;MRPL2;MRPS17;MRPL40;GADD45GIP1;MRPL57;MRPL9;MRPL18;MRPL58;MRPS6;MRPL4;MRPL43;MRPL35;MRPS18A;MRPS15;MTG1;MRPL44;MRPL30;MRPS10;MRPL21;MRPL47;MRPL10;MRPS18B;MRPS11;MRPL41;MRPS23;MRPL20;MTRF1L;MRPL50;MRPS21;MRPS22;MRPL39;MRPS…	L5-6NP
48	WikiPathway_2023_Human__Mitochondrial Complex IV Assembly WP4922	-0.493104	-2.59105	0	0.00049091	0.02	22/30	31.40%	PET117;SURF1;COX8A;COX6A1;COX14;COA3;COX4I1;PET100;COX7C;COX5B;COX7B;NDUFA4;COA6;COX7A2;COX5A;COX6B1;COX15;TMEM177;COX20;HIGD1A;COX18;COX17	L5-6NP
49	WikiPathway_2023_Human__GPCRs Class A Rhodopsin Like WP455	0.313466	2.58593	0	0.0115881	0.04	38/94	12.37%	OR3A1;ADRA1A;HTR7;GPR87;HTR1F;LPAR4;FPR1;MC4R;ADORA2B;P2RY1;CYSLTR1;FPR2;GRPR;OR3A2;PTAFR;LTB4R;GPR75;DRD2;FSHR;ADRB1;HCRTR2;HTR4;GPR63;NMBR;MAS1;CHRM3;EDNRA;HTR1A;GPR161;SSTR2;P2RY11;OPRD1;MC1R;RGL4;CHRM5;GPR68;HTR6;HRH3	L5-6NP
50	GO_Biological_Process_2023__Ribosome Assembly (GO:0042255)	-0.433676	-2.53719	0	0.000778248	0.033	24/41	22.90%	NOP53;RPS28;RPS15;MRPS2;NLE1;NGRN;MRPS7;RRS1;RPL10;RPS14;RPLP0;EIF6;RPS27;C1QBP;RPS5;PPAN;RPL11;RPL23A;RPS19;RPL5;RPL6;SBDS;RRP7A;RPSA	L5-6NP
51	GO_Biological_Process_2023__Sensory Perception Of Chemical Stimulus (GO:0007606)	0.538236	2.52476	0	0.0133546	0.059	10/18	9.49%	OR51M1;C5AR1;OR51B5;OR3A2;SLC24A4;DRD2;OR9Q1;NXNL2;SYT10;OR2M4	L5-6NP
52	WikiPathway_2023_Human__GPCRs Other WP117	0.403477	2.51947	0	0.0111924	0.061	20/43	11.55%	OR3A1;HTR7;GPR143;HTR1F;MCHR2;ACKR1;GRPR;FSHR;SMO;ADGRG1;GPR183;HRH4;CHRM3;EDNRA;SSTR2;P2RY11;CELSR1;OR2M4;ADGRV1;CELSR3	L5-6NP
53	GO_Cellular_Component_2023__Proton-Transporting ATP Synthase Complex (GO:0045259)	-0.597519	-2.48143	0	0.00123055	0.055	15/17	31.71%	ATP5PO;ATP5MC1;ATP5MC3;ATP5F1D;ATP5PF;ATP5F1E;ATP5MF;ATP5PD;ATP5MGL;ATP5ME;ATP5MK;ATP5MJ;ATP5F1B;ATP5PB;ATP5MG	L5-6NP
54	GO_Cellular_Component_2023__Mitochondrial Proton-Transporting ATP Synthase Complex (GO:0005753)	-0.597519	-2.48143	0	0.00123055	0.055	15/17	31.71%	ATP5PO;ATP5MC1;ATP5MC3;ATP5F1D;ATP5PF;ATP5F1E;ATP5MF;ATP5PD;ATP5MGL;ATP5ME;ATP5MK;ATP5MJ;ATP5F1B;ATP5PB;ATP5MG	L5-6NP
55	GO_Biological_Process_2023__Homologous Chromosome Pairing At Meiosis (GO:0007129)	0.526937	2.47858	0	0.015969	0.098	15/19	25.54%	TEX11;IHO1;HORMAD1;P3H4;SYCE2;TEX15;BAG6;RNF212B;TERB1;RNF212;FANCD2;MEI4;ZCWPW1;SYCP2;SYCE1	L5-6NP
56	GO_Cellular_Component_2023__Mitochondrial Intermembrane Space (GO:0005758)	-0.387266	-2.4693	0	0.00137876	0.062	39/55	39.69%	PRELID1;DIABLO;NDUFB7;TRIAP1;TIMM8A;CHCHD10;TIMM10;BLOC1S1;TIMM8B;CHCHD4;HAX1;ARL2;TIMM13;STOML2;CHCHD2;HTRA2;CHCHD5;SOD1;GATM;COA6;COA4;NME4;THOP1;COA7;NDUFA8;SDHAF3;ARL2BP;PINK1;REXO2;CYCS;UQCC2;TIMM10B;COX17;TIMM29;PRELID3A;AIFM1;SIRT5;NLN;TIMM9	L5-6NP
57	GO_Biological_Process_2023__rRNA Metabolic Process (GO:0016072)	-0.334302	-2.46187	0	0.00141564	0.065	53/84	36.46%	RRP9;NOP53;NOC4L;NOL6;RPS28;BYSL;RPS16;EXOSC4;RPS15;PIH1D2;WDR18;RPL26;RPS17;RPS6;RPL35A;EXOSC5;TRIR;RPS25;RPS7;RPS27;FBL;NIFK;EMG1;RPL11;RPS19;RPL5;PIH1D1;LYAR;NOP56;DDX54;POP4;SBDS;RRP7A;RPL7;SIRT7;MRTO4;RPL14;EBNA1BP2;RPL27;WDR74;NOLC1;RPS24;DEDD2;GTF3A;DCAF13;UTP15;EXOSC3;SPPL2B;RRP36;NOP14;EXOSC9;DDX27;EXOSC6	L5-6NP
58	GO_Molecular_Function_2023__G Protein-Coupled Peptide Receptor Activity (GO:0008528)	0.408987	2.46146	0	0.0163525	0.115	18/37	10.16%	PTH2R;GLP2R;FPR1;MC4R;MCHR2;CYSLTR1;FPR2;GRPR;PTH1R;LTB4R;NPSR1;HCRTR2;NMBR;MAS1;EDNRA;OPRD1;SORCS1;MC1R	L5-6NP
59	GO_Biological_Process_2023__Energy Derivation By Oxidation Of Organic Compounds (GO:0015980)	-0.434189	-2.44545	0	0.00167915	0.078	21/38	21.41%	ADGRF5;COX8A;COX6A1;CYC1;UQCR10;COX4I1;UQCRQ;COX7C;COX5B;MTLN;CHCHD5;UQCR11;COX7B;NDUFA4;MT3;COX7A2;UQCRH;COX5A;UQCRB;COX6B1;COX15	L5-6NP
60	WikiPathway_2023_Human__Extrafollicular And Follicular B Cell Activation By SARS CoV 2 WP5218	-0.473148	-2.44219	0	0.00172944	0.08	16/30	11.28%	SYK;CD22;IFIT2;PTPRC;TLR4;C3;ICOSLG;IRF8;BLNK;PRDM1;ETS1;MAF;TMSB10;CR1;ZEB2;FOXO1	L5-6NP
61	GO_Cellular_Component_2023__Organelle Envelope Lumen (GO:0031970)	-0.365666	-2.43793	0	0.00179788	0.084	37/61	33.97%	PRELID1;DIABLO;NDUFB7;TRIAP1;TIMM8A;CHCHD10;TIMM10;BLOC1S1;TUBB2A;TIMM8B;CHCHD4;HAX1;ARL2;ALOX5;TIMM13;STOML2;CHCHD2;HTRA2;CHCHD5;SOD1;GATM;COA6;COA4;NME4;THOP1;COA7;NDUFA8;SDHAF3;ARL2BP;PINK1;REXO2;CYCS;UQCC2;TIMM10B;COX17;TIMM29;PRELID3A	L5-6NP
62	MSigDB_Hallmark_2020__Coagulation	-0.327288	-2.43565	0	0.00184425	0.088	47/84	28.57%	OLR1;ITGA2;CD9;ANXA1;F3;C3;CSRP1;S100A1;F12;MAFF;APOC1;MMP15;HTRA1;RAPGEF3;CFH;SPARC;CTSO;CRIP2;HPN;PLG;BMP1;S100A13;CFD;TIMP3;DPP4;RGN;GNG12;GNB2;F10;MST1;ACOX2;A2M;TF;SERPING1;RABIF;ISCU;SH2B2;DUSP6;CAPN5;SIRT2;CPQ;CTSK;GSN;ARF4;FN1;DCT;DUSP14	L5-6NP
63	WikiPathway_2023_Human__Oligodendrocyte Specification And Differentiation Leading To Myelin Components For CNS WP4304	-0.535277	-2.43288	0	0.001889	0.091	14/21	17.78%	OLIG2;MOG;MAG;OLIG1;ASCL1;BMP2;NKX2-2;GLI2;MBP;IGF1;SOX9;PLP1;CNP;SOX10	L5-6NP
64	GO_Biological_Process_2023__Ribonucleoprotein Complex Biogenesis (GO:0022613)	-0.30609	-2.43095	0	0.0019322	0.092	67/115	34.64%	RRP9;MRPL36;NOL6;RPS28;BYSL;MRPS12;RPS16;RPS13;RPS15;RPS4X;NOP16;RPL26;RSL24D1;RPS17;RPS6;RPL35A;RRS1;RPS11;RPS14;RPS25;RPS7;RPS27;RPS3A;RPS23;RPS5;FBL;SNU13;EMG1;RPL11;NOC2L;SHQ1;RPL38;RPS19;RPL5;RPL26L1;NOP56;RPS9;RPS15A;RPS19BP1;RRP7A;RPL7;WDR46;RBIS;ZNF658;RIOK1;MRTO4;RPL14;UTP3;WDR3;ZNF622;EBNA1BP2;WDR74;GLUL;RPS24;RPS8;METTL17;GTF3A;TBL3;PAK1IP1;RIOK2;UTP15;SPPL2B;TMA16;FCF1;UTP11;RRP36;NOL7	L5-6NP
65	KEGG_2021_Human__Non-alcoholic fatty liver disease	-0.293523	-2.40019	0	0.00260709	0.127	71/131	32.82%	NDUFA2;NDUFB11;COX8A;NDUFC2;NDUFA13;FOS;NDUFB10;NDUFB7;NDUFS3;COX6A1;CYC1;UQCR10;PKLR;COX4I1;UQCRQ;NDUFB3;COX7C;COX5B;NDUFB8;NDUFA11;NDUFA1;UQCR11;COX7B;NDUFS7;NDUFA4;NDUFB2;MAPK11;NDUFA3;BAX;COX7A1;NDUFV2;UQCRFS1;COX7A2;TGFB1;UQCRH;NDUFA6;PRKAB1;COX5A;UQCRB;MAPK12;COX6B1;CASP8;PIK3R3;NDUFB9;NDUFS6;NDUFS5;NDUFS8;ATF4;NDUFC1;NDUFV1;GSK3A;ADIPOR2;BCL2L11;MAP3K11;TRAF2;NDUFS2;NDUFA8;RXRA;NDUFAB1;NR1…	L5-6NP
66	GO_Biological_Process_2023__Metanephros Development (GO:0001656)	0.567948	2.39261	0	0.0267091	0.201	8/15	9.81%	FGF10;GDNF;WNT7B;GDF6;PAX8;SIX4;ROBO2;CTSH	L5-6NP
67	KEGG_2021_Human__Herpes simplex virus 1 infection	0.198232	2.38137	0	0.0269447	0.228	214/416	34.35%	ZNF726;TNFRSF1A;CGAS;ZNF676;HLA-E;SP100;HLA-F;ZNF23;TLR2;IRF9;CD74;TRAF5;ALYREF;ZNF256;ZNF600;ZNF765;PIK3R2;ZNF98;TAP2;ZNF221;ZNF20;ZNF649;ZNF700;ZNF286A;OAS1;IKBKE;ZNF688;ZNF671;RNASEL;ZNF707;ZNF334;ZNF792;ZNF132;ZNF563;ZNF550;ZNF441;FAS;ZNF416;ZNF853;ZNF77;ZNF85;IKBKG;ZNF418;ZNF613;ZNF582;ZNF300;ZNF841;ZNF879;ZNF836;ZNF157;ZNF630;ZNF761;ZNF19;ZNF773;ZNF17;ZNF610;ZNF620;ZNF257;ZNF682;ZNF621;ZNF2…	L5-6NP
68	GO_Biological_Process_2023__Negative Regulation Of Epithelial Cell Proliferation (GO:0050680)	-0.387115	-2.37032	0	0.00379052	0.178	23/49	18.33%	RGCC;FGFR2;DUSP10;SOX2;CEACAM1;CNMD;CAV1;EPPK1;CAV2;CDKN1C;PTPRK;ATP5IF1;APOE;SPARC;ALOX5;HPN;SOX9;ROBO1;IL26;TINF2;B2M;NFIB;TGFB1	L5-6NP
69	GO_Biological_Process_2023__rRNA Processing (GO:0006364)	-0.307389	-2.36645	0	0.00392651	0.185	59/98	36.37%	RRP9;NOP53;NOC4L;NOL6;RPS28;NHP2;RPS16;EXOSC4;RPS15;PIH1D2;MAK16;WDR18;RPL26;RPS17;RPS6;RPL35A;EXOSC5;RPS14;RPS25;RPS7;EIF6;RPS27;TSR3;FBL;SNU13;EMG1;RPL11;RPS19;RPL5;PIH1D1;LYAR;NOP56;DDX54;POP4;SBDS;RRP7A;RPL7;RIOK1;MRTO4;RPL14;SART1;MRM1;WDR3;EBNA1BP2;RPL27;WDR74;NOLC1;RPS24;DCAF13;RIOK2;UTP15;EXOSC3;SPPL2B;RRP36;ERI1;NOP14;EXOSC9;NOL9;DDX27	L5-6NP
70	WikiPathway_2023_Human__Vitamin D Receptor Pathway WP2877	-0.323284	-2.36151	0	0.00409355	0.195	36/86	18.33%	CDKN2A;CD9;LRP5;SOSTDC1;KLK6;ADGRE5;DUSP10;ID4;IRF8;IGFBP5;ADAMTS5;CEACAM1;NFATC2;SEMA3B;ITGAM;PRDM1;HILPDA;JUNB;HLA-DRB1;ID1;ALOX5;SPP1;SERPINB1;CCNE1;S100A6;GADD45A;FOXO1;GXYLT2;TIMP3;CDKN2D;CREG2;SALL4;ADRA1B;CLPTM1L;CDKN1B;TGFB1	L5-6NP
71	GO_Biological_Process_2023__ATP Biosynthetic Process (GO:0006754)	-0.489766	-2.35	0	0.00456921	0.215	20/24	38.43%	ATP5PO;ATP5MC1;ATP5MC3;ATP5F1D;ATP5PF;ALDOA;ATP5F1E;ATP5MF;TGFB1;ATP5PD;ATP5MGL;ATP5ME;ATP5MK;ATP5MJ;ATP5F1B;ATP5PB;ATP5MG;ATP5F1A;ATP5MC2;VPS9D1	L5-6NP
72	GO_Molecular_Function_2023__Copper Ion Binding (GO:0005507)	-0.443125	-2.34876	0	0.00453215	0.215	22/30	34.12%	HEPH;SCO2;CUTA;SNCG;LACC1;S100A13;SOD1;MOXD1;MT3;ATOX1;COA6;TP53;ATP7A;RNF7;PARK7;SNCB;DCT;P2RX4;CUTC;COX17;CCS;PRNP	L5-6NP
73	WikiPathway_2023_Human__Pluripotent Stem Cell Differentiation Pathway WP2848	0.45103	2.32911	0	0.0383255	0.329	13/24	11.39%	KIT;FGF10;WNT2;FGF2;IL6R;WNT7B;KITLG;TGFB3;WNT5A;VEGFA;PDGFB;ALK;EGF	L5-6NP
74	GO_Biological_Process_2023__Positive Regulation Of ERK1 And ERK2 Cascade (GO:0070374)	-0.301588	-2.31511	0	0.00610203	0.271	41/108	16.46%	MUSK;KDR;NPNT;HTR2B;GCNT2;FGFR3;FGFR2;NOTCH1;PTPRC;PDGFD;CSF1R;P2RY6;ERBB4;BMP2;EGFR;FGFR4;NTRK3;CIB1;NOTCH2;ROR2;GLIPR2;ARHGAP8;SEMA7A;HLA-DRB1;ADRA1D;CXCL17;PDGFRB;APOE;DDT;DDR1;IGF1;CD4;ANGPT1;PHB2;HRAS;OPRM1;PRKD2;IL26;PHB1;NECAB2;MT3	L5-6NP
75	GO_Cellular_Component_2023__Spliceosomal snRNP Complex (GO:0097525)	-0.350352	-2.31052	0	0.00632587	0.282	37/56	38.48%	SF3B5;SF3B4;SNRPE;PHF5A;LSM4;TSSC4;SNRPG;CD2BP2;SNRPD2;LSM7;SNU13;SF3B6;PRPF31;SNRPA;SNRPB;HTATSF1;TXNL4B;LSM3;LSM2;SF3B2;SNRPD1;SF3A2;SNRPB2;SF3A1;BUD13;PPIH;LSM5;SNIP1;PRPF4;RBMX2;LUC7L2;DDX23;SF3A3;DDX39B;SNRPN;PRPF8;TXNL4A	L5-6NP
76	WikiPathway_2023_Human__Nonalcoholic Fatty Liver Disease WP4396	-0.283031	-2.30404	0	0.00654302	0.294	69/128	32.82%	NDUFA2;NDUFB11;COX8A;NDUFC2;NDUFA13;NDUFB10;NDUFB7;NDUFS3;COX6A1;CYC1;UQCR10;PKLR;COX4I1;UQCRQ;NDUFB3;COX7C;COX5B;NDUFB8;NDUFA11;NDUFA1;SMAD7;UQCR11;COX7B;NDUFS7;NDUFA4;NDUFB2;NDUFA3;BAX;COX7A1;NDUFV2;UQCRFS1;COX7A2;TGFB1;UQCRH;NDUFA6;PRKAB1;COX5A;UQCRB;COX6B1;CASP8;PIK3R3;NDUFB9;NDUFS6;NDUFS5;NDUFS8;ATF4;NDUFC1;NDUFV1;GSK3A;ADIPOR2;BCL2L11;MAP3K11;TRAF2;NDUFS2;NDUFA8;RXRA;NDUFAB1;NR1H3;SDHD;SREB…	L5-6NP
77	GO_Biological_Process_2023__Protein Targeting To Mitochondrion (GO:0006626)	-0.371887	-2.28585	0	0.00757782	0.334	38/55	39.69%	NDUFA13;TIMM8A;TIMM10;AIP;TOMM5;MTX1;TIMM8B;TOMM22;CHCHD4;TIMM13;TOMM40L;TOMM7;GRPEL1;TSPO;TIMM17B;FIS1;ROMO1;GRPEL2;BCAP31;TOMM20;TOMM34;TIMM22;HSP90AA1;TIMM17A;TOMM40;PMPCA;TIMM50;TIMM44;DNAJC19;TIMM10B;TIMM29;MFN2;AIFM1;SAMM50;MTCH1;HSPD1;FBXO7;TIMM9	L5-6NP
78	GO_Biological_Process_2023__Protein Homooligomerization (GO:0051260)	0.263723	2.28331	0	0.04941	0.424	35/100	16.84%	ADCY8;UPB1;RNF135;KCNJ2;BLM;NLRP1;RYR3;SHMT2;PXDN;CRYZ;MAT1A;BEND3;AQP4;AMH;NOL3;BCL10;NINJ1;THG1L;EHD4;NLRC4;SAMD1;FOXM1;PKD2L1;KCNC2;GLRA3;EHD1;SHMT1;KCNJ12;TRPM4;TRPV1;ALAD;RYR1;ECT2;TIFA;ALDH1A2	L5-6NP
79	KEGG_2021_Human__Alzheimer disease	-0.227193	-2.27944	0	0.00796162	0.353	129/301	29.92%	ATG101;NDUFA2;LRP5;NOX4;NDUFB11;COX8A;SLC25A5;NDUFC2;ADRM1;NDUFA13;FRAT2;NDUFB10;NDUFB7;BACE2;ATP5PO;NDUFS3;PSMB6;COX6A1;FADD;TUBB6;CYC1;HSD17B10;ATP5MC1;PPIF;TUBA4A;PLCB2;WNT4;UQCR10;TUBB2A;COX4I1;CACNA1F;GRIN2C;UQCRQ;PSMC3;APOE;NDUFB3;COX7C;COX5B;NDUFB8;ATP5MC3;ATP5F1D;GAPDH;NDUFA11;NDUFA1;PSMD8;TUBB4B;ATP2A3;ATP2A1;TUBA1B;HRAS;LPL;UQCR11;COX7B;ATP5PF;CHRM1;SLC25A4;NDUFS7;NDUFA4;AXIN2;TUBB4A;DV…	L5-6NP
80	GO_Biological_Process_2023__Heart Morphogenesis (GO:0003007)	-0.400888	-2.25991	0	0.00957441	0.421	17/38	15.50%	HTR2B;MESP1;CHD7;NOTCH1;TBX19;BMP2;ADAMTS5;LEFTY1;HES1;TCAP;RBM20;HEY1;TTN;SOX9;EMP2;DYNLL1;FKBP1A	L5-6NP
81	KEGG_2021_Human__Pathways of neurodegeneration	-0.214502	-2.2413	0	0.0112501	0.478	182/395	34.12%	ATG101;NDUFA2;LRP5;NOX4;NDUFB11;COX8A;SLC25A5;NDUFC2;GPX3;ADRM1;NDUFA13;FRAT2;NDUFB10;NDUFB7;GRM1;ATP5PO;NDUFS3;PSMB6;COX6A1;FADD;TUBB6;HAP1;CYC1;HSD17B10;ATP5MC1;UBB;PPIF;CAT;TUBA4A;PLCB2;WNT4;UQCR10;TUBB2A;DNAL4;RPS27A;COX4I1;CACNA1F;SEPTIN5;UBC;DNAH5;GRIN2C;UQCRQ;PSMC3;NDUFB3;COX7C;SIGMAR1;COX5B;DCTN3;NDUFB8;ATP5MC3;ATP5F1D;TOMM40L;UBE2L6;NDUFA11;NDUFA1;PSMD8;TUBB4B;ATP2A3;ATP2A1;HTRA2;TUBA1B;…	L5-6NP
82	GO_Biological_Process_2023__Ribosome Biogenesis (GO:0042254)	-0.265796	-2.24002	0	0.0111854	0.479	89/149	39.63%	RRP9;NOP53;NOC4L;MRPL36;NOL6;RPS28;BYSL;MRPS12;RPS16;RPS13;EXOSC4;RPS15;RPS4X;NOP16;PIH1D2;WDR18;RPL26;RSL24D1;RPS17;RPS6;RPL35A;EXOSC5;RRS1;RPS11;RPS14;RPS25;RPS7;RPS27;RPS3A;RPS23;RPS5;FBL;SNU13;EMG1;RPL11;NOC2L;RPS19;RPL5;RPL26L1;PIH1D1;LYAR;NOP56;DDX54;RPS9;RPS15A;POP4;RPS19BP1;SBDS;RRP7A;RPL7;WDR46;RBIS;ZNF658;RIOK1;MRTO4;RPL14;UTP3;WDR3;ZNF622;EBNA1BP2;RPL27;WDR74;NOLC1;GLUL;RPS24;RPS8;METT…	L5-6NP
83	KEGG_2021_Human__Olfactory transduction	0.320332	2.23903	0	0.0641584	0.544	26/54	22.62%	OR3A1;OR51M1;CNGB1;OR13A1;PRKG1;OR51B5;OR3A2;SLC24A4;ANO2;OR56B1;OR9Q1;OR10AC1;CNGA4;OR2AJ1;OR2M4;GNAL;OR1B1;OR2M2;OR2L13;OR2L2;GRK2;OR2M3;OR1F1;OR2L3;PRKG2;SLC8A3	L5-6NP
84	MSigDB_Hallmark_2020__Reactive Oxygen Species Pathway	-0.38217	-2.22831	0	0.0122513	0.511	30/43	38.01%	GPX3;JUNB;CAT;GPX4;MBP;PRDX2;SOD1;SELENOS;CDKN2D;GLRX;PDLIM1;LAMTOR5;ATOX1;NDUFA6;NQO1;PRDX1;PRDX6;MGST1;FTL;GLRX2;NDUFS2;PTPA;ERCC2;NDUFB4;PRNP;IPCEF1;TXN;HMOX2;GCLC;STK25	L5-6NP
85	WikiPathway_2023_Human__Neural Crest Differentiation WP2064	-0.338237	-2.22476	0	0.0123827	0.519	24/63	14.32%	OLIG2;BMP7;FGFR3;ZIC1;FGFR2;NOTCH1;DLL3;CDH1;OLIG1;NOTCH3;MPZ;ASCL1;CTBP2;HES1;ETS1;NOTCH2;PMP22;ID1;MBP;GJB1;SOX9;CDH7;AXIN2;DVL1	L5-6NP
86	GO_Biological_Process_2023__Gland Development (GO:0048732)	-0.387035	-2.21662	0	0.0132723	0.537	17/39	12.76%	FGFR2;ANXA1;PROX1;SALL1;SOX2;CAV1;FADD;GLI2;HES1;COBL;GFER;MSN;WNT4;CITED2;MET;SOX9;SOD1	L5-6NP
87	GO_Biological_Process_2023__Protein Insertion Into Mitochondrial Membrane (GO:0051204)	-0.446593	-2.21625	0	0.0131555	0.539	20/27	36.39%	NDUFA13;TIMM8A;TIMM10;TOMM5;MTX1;TIMM8B;TOMM22;TIMM13;MOAP1;TOMM7;ROMO1;TOMM20;TIMM22;HSP90AA1;TOMM40;TIMM10B;COX18;TIMM29;SAMM50;MTCH1	L5-6NP
88	GO_Biological_Process_2023__Positive Regulation Of MAPK Cascade (GO:0043410)	-0.248329	-2.21281	0	0.013427	0.55	68/196	18.33%	MUSK;KDR;NPNT;HTR2B;GCNT2;FGFR3;LPAR1;FGFR2;NOTCH1;PTPRC;TLR4;PDGFD;CSF1R;IGFBP6;P2RY6;TGFA;ERBB4;SOX2;BMP2;GPR37L1;EGFR;CAV2;FGFR4;NTRK3;PLCG2;LAMTOR1;CIB1;DIRAS1;NOTCH2;ROR2;GLIPR2;ARHGAP8;CD81;SEMA7A;HLA-DRB1;ADRA1D;CXCL17;PDGFRB;APOE;DDT;GFRAL;DDR1;IGF1;CD4;ADAM8;ANGPT1;PLCE1;PHB2;HRAS;OPRM1;SOD1;PRKD2;DOK3;ROBO1;IL26;PHB1;ADRA1B;NECAB2;PPIA;MT3;GPR37;AVPI1;TRIM5;EPHA8;JCAD;DRD4;TGFBR1;TGFB1	L5-6NP
89	GO_Biological_Process_2023__Establishment Of Protein Localization To Mitochondrion (GO:0072655)	-0.397264	-2.21164	0	0.0134521	0.554	24/41	27.16%	TIMM10;AIP;TOMM5;TIMM8B;TOMM22;CHCHD4;TIMM13;TOMM40L;TOMM7;GRPEL1;TSPO;TIMM17B;FIS1;ROMO1;GRPEL2;BCAP31;TOMM20;TOMM34;TIMM17A;TOMM40;TIMM50;TIMM44;DNAJC19;PINK1	L5-6NP
90	GO_Cellular_Component_2023__Small-Subunit Processome (GO:0032040)	-0.325975	-2.20834	0	0.0137825	0.567	41/69	35.42%	RRP9;NOC4L;NOL6;RPS28;MRPS12;RPS16;RPS13;RPS4X;RPS27A;RPS17;RPS6;RPS11;RPS14;FBLL1;RPS7;RPS27;RPS3A;RPS23;RPS5;FBL;SNU13;EMG1;RPS19;NOP56;RPS9;RPS15A;RPS19BP1;RRP7A;WDR46;UTP3;WDR3;RPS24;RPS8;DCAF13;TBL3;UTP15;SPPL2B;FCF1;UTP11;NOL7;NOP14	L5-6NP
91	WikiPathway_2023_Human__Extracellular Vesicles In The Crosstalk Of Cardiac Cells WP4300	-0.558245	-2.20634	0.00175439	0.0139123	0.571	9/15	14.65%	KDR;TLR4;HSPB1;EGFR;CD81;SPP1;IGF1;SOD1;CD63	L5-6NP
92	GO_Molecular_Function_2023__G Protein-Coupled Receptor Activity (GO:0004930)	0.247641	2.19875	0	0.0789208	0.646	35/113	11.31%	GPR143;CASR;PTH2R;GPR87;GLP2R;FPR1;ADORA2B;ADGRL4;MCHR2;P2RY1;C5AR1;CYSLTR1;FPR2;GRPR;PTH1R;PTAFR;LTB4R;ADCYAP1R1;GPR75;PAX8;DRD2;GPR78;ADGRG1;GPR156;GPR183;GPR63;MAS1;GRM2;GPR161;ADGRG2;OPRD1;MC1R;PDGFRL;GPR26;ADGRV1	L5-6NP
93	GO_Biological_Process_2023__Ribosomal Small Subunit Biogenesis (GO:0042274)	-0.309676	-2.19337	0	0.0153276	0.603	48/80	35.42%	RRP9;NOL6;RPS28;MRPS12;RPS16;RPS13;RPS15;RPS4X;RPS17;RPS6;MRPS7;RPS11;RPS14;RPS25;RPS7;RPS27;RPS3A;TSR3;RPS23;RPS5;FBL;SNU13;EMG1;RPS19;NOP56;RPS9;RPS15A;RPS19BP1;RRP7A;WDR46;RIOK1;RPSA;UTP3;WDR3;RPS24;RPS8;MRPS11;METTL17;ERAL1;TBL3;RIOK2;UTP15;SPPL2B;FCF1;UTP11;RRP36;NOL7;NOP14	L5-6NP
94	GO_Biological_Process_2023__Protein Targeting To ER (GO:0045047)	-0.463015	-2.19334	0.00332779	0.0151407	0.603	18/23	38.60%	GET3;GET4;SRP14;UBL4A;ZFAND2A;SPCS1;CHMP4A;SRPRA;SRP9;SGTA;SRPRB;SPCS3;ZFAND2B;SEC61A1;EDEM1;SPCS2;MAN1A1;SEC62	L5-6NP
95	GO_Cellular_Component_2023__Mitochondrial Ribosome (GO:0005761)	-0.488787	-2.18972	0.00167224	0.0154613	0.615	18/21	38.78%	MRPL28;MRPL49;MRPS12;MRPL51;MRPL34;MRPL14;MRPL40;MRPL57;MRPL9;MRPL18;MRPL43;MRPL35;MTG1;MRPL20;MRPS22;MTG2;MRPL39;MRPL13	L5-6NP
96	WikiPathway_2023_Human__Mitochondrial Complex III Assembly WP4921	-0.545025	-2.18881	0.00175747	0.0153426	0.617	11/15	30.29%	CYC1;BCS1L;UQCC3;UQCR10;UQCRQ;UQCR11;UQCRFS1;UQCRH;UQCRB;UQCC2;UQCRC1	L5-6NP
97	GO_Biological_Process_2023__I-kappaB kinase/NF-kappaB Signaling (GO:0007249)	0.34465	2.18497	0.00263158	0.0809147	0.676	21/38	27.57%	TLR2;PRDX4;BCL10;IKBKG;RELB;TRIM8;TIFA;BIRC3;TIRAP;NLRC3;MAP3K14;NFKBIA;IRAK2;FAIM;TRAF6;DAB2IP;RELA;IKBKB;RIPK2;REL;NKIRAS1	L5-6NP
98	GO_Biological_Process_2023__Positive Regulation Of Cytokine-Mediated Signaling Pathway (GO:0001961)	0.376851	2.18135	0.00717703	0.0776685	0.686	13/32	9.93%	TXK;CD74;AXL;AGPAT2;PARP14;NLRC5;PARP9;IKBKE;WNT5A;IRGM;RBM47;EDN1;HSPA1B	L5-6NP
99	WikiPathway_2023_Human__Hypothesized Pathways In Pathogenesis Of Cardiovascular Disease WP3668	0.443998	2.17749	0.00471698	0.0751459	0.698	10/21	13.36%	TGFBR2;TGFBR3;SMAD3;FBN3;FLNA;RUNX2;LTBP1;LTBP2;SHC1;ENG	L5-6NP
100	GO_Cellular_Component_2023__Clathrin-Coated Vesicle Membrane (GO:0030665)	-0.326234	-2.16967	0	0.0178765	0.686	25/58	21.65%	CD9;LRP2;F3;TGFA;EGFR;GAD2;LDLRAP1;ROR2;HLA-DRB1;APOE;SYT2;SYT9;CFTR;CD4;GAD1;RAB3A;AP2M1;MYCBPAP;VAMP2;FZD4;AP2S1;DNAJC5;HSPA8;HBEGF;NECAP1	L5-6NP
101	WikiPathway_2023_Human__Parkin Ubiquitin Proteasomal System Pathway WP2359	-0.316176	-2.15201	0	0.0207732	0.738	49/64	47.93%	HSPA2;TUBB6;HSPA1L;PSMD10;TUBA4A;TUBB2A;SEPTIN5;PSMC3;CASP1;UBE2L6;CCNE1;HSPA1A;PSMD8;TUBB4B;TUBA1B;TUBB4A;STUB1;TUBA1A;GPR37;PSMC5;TUBB;TUBB2B;HSPA8;CASP8;HSPA5;PSMD2;PSMD6;PSMD3;UBE2J2;PSMC4;HSPA14;PSMC1;PSMD4;UBA1;PSMD7;SIAH1;PSMC6;HSPA4;UBE2L3;RNF19A;PSMD12;UBE2G2;UBE2J1;SNCA;PSMD13;HSPA9;UBE2G1;PSMD14;FBXW7	L5-6NP
102	WikiPathway_2023_Human__Kallmann Syndrome WP5074	-0.501017	-2.14922	0	0.0211027	0.747	7/18	4.90%	OLIG2;TMEM98;MYRF;CHD7;PLXND1;ASCL1;GNRH1	L5-6NP
103	KEGG_2021_Human__Neuroactive ligand-receptor interaction	0.21938	2.14737	0	0.0861376	0.765	50/171	12.37%	ADRA1A;HTR7;GRIK1;PTH2R;HTR1F;GLP2R;LPAR4;FPR1;MC4R;ADORA2B;MCHR2;P2RY1;C5AR1;CYSLTR1;FPR2;GRPR;KNG1;PTH1R;CALCB;GABRG1;PTAFR;UTS2B;LTB4R;ADCYAP1R1;DRD2;FSHR;ADRB1;HCRTR2;TACR1;HTR4;GPR156;NMBR;MAS1;GRM2;HRH4;CHRM3;EDNRA;HTR1A;SSTR2;P2RY11;OPRD1;EDN1;GLRA1;MC1R;CHRNA1;CHRM5;CHRNE;HTR6;GLRA3;HRH3	L5-6NP
104	GO_Molecular_Function_2023__rRNA Binding (GO:0019843)	-0.364876	-2.14242	0.00162075	0.0220115	0.761	25/43	29.14%	NOP53;MRPL16;RPS13;MRPL11;NGRN;MRPS7;RRS1;RPS14;RPL12;RPLP0;RPS5;MRPL18;PPAN;EMG1;MRPS6;RPL11;RPL5;RPS9;MRPS18A;SBDS;FASTKD5;MRPS11;RPL17;GTF3A;ERAL1	L5-6NP
105	GO_Biological_Process_2023__ncRNA Processing (GO:0034470)	-0.278423	-2.1406	0	0.0220852	0.766	56/98	36.93%	RPP21;POP7;RRP9;NOP53;NOC4L;NOL6;RPS28;BYSL;RPS16;EXOSC4;RPS15;PIH1D2;WDR18;RPL26;RPS17;RPS6;RPL35A;TUT1;EXOSC5;RPS25;RPS7;RPS27;FBL;EMG1;RPL11;RPS19;RPL5;PIH1D1;LYAR;NOP56;DDX54;POP4;SBDS;RRP7A;RPL7;INTS1;MRTO4;RPL14;EBNA1BP2;RPL27;WDR74;NOLC1;RPS24;DCAF13;KARS1;UTP15;EXOSC3;SPPL2B;INTS13;RRP36;NOP14;ADAT1;SSB;EXOSC9;DDX27;RPP30	L5-6NP
106	GO_Cellular_Component_2023__Golgi Lumen (GO:0005796)	0.304853	2.13645	0	0.0877586	0.789	23/51	19.67%	GPC4;VCAN;RHBDF2;GPC5;WNT7B;GOLIM4;GPC6;MUC12;PROC;WNT3;NGF;WNT5A;SDC2;F8;PDGFB;PCSK5;WNT5B;MUC4;FURIN;HSPG2;PROS1;SDC3;SDF4	L5-6NP
107	MSigDB_Hallmark_2020__UV Response Up	-0.257483	-2.13599	0	0.0227309	0.778	76/133	36.58%	FEN1;ONECUT1;ATP6V1F;ATF3;GPX3;LYN;FOS;BMP2;H2AX;CDKN1C;FOSB;HSPA2;NTRK3;POLE3;JUNB;PPIF;CCK;TUBA4A;IGFBP2;PSMC3;SIGMAR1;SELENOW;BTG1;MRPL23;UROD;CCNE1;EPHX1;FKBP4;GRPEL1;SLC25A4;ALDOA;EPCAM;WIZ;GRINA;AP2S1;E2F5;CA2;CNP;HYAL2;RHOB;RFC4;YKT6;RXRB;DGAT1;ENO2;BTG2;CDO1;CDC34;DNAJA1;PDAP1;GCH1;BCL2L11;POLR2H;ARRB2;ABCB1;SLC6A8;KCNH2;EIF5;MAPK8IP2;IL6ST;OLFM1;PLCL1;KLHDC3;ACAA1;CEBPG;CLTB;MGAT1;RPN1;A…	L5-6NP
108	GO_Molecular_Function_2023__Cytokine Activity (GO:0005125)	0.321327	2.13415	0	0.0847463	0.796	19/46	12.30%	BMP6;NRG1;WNT2;FGF2;WNT7B;GDF6;KITLG;WNT3;KLF5;TGFB3;WNT8A;WNT5A;IL15;AMH;EDN1;VEGFA;IL16;WNT5B;INHA	L5-6NP
109	GO_Molecular_Function_2023__Cyclin-Dependent Protein Serine/Threonine Kinase Regulator Activity (GO:0016538)	-0.381164	-2.13028	0	0.0235799	0.794	24/36	34.49%	CDKN2A;CCNB1;CKS2;CDK5R2;CCNE2;CCNE1;CKS1B;CDKN2D;HEXIM2;CDKN1B;CCNQ;CNPPD1;CCNB3;CCNJ;CCNJL;KAT2B;HEXIM1;CCNG1;CCNF;CCNI;CDK5R1;CCNG2;CCND2;CCNYL1	L5-6NP
110	KEGG_2021_Human__Cardiac muscle contraction	-0.321232	-2.12666	0.00166945	0.0240401	0.806	24/59	20.23%	COX8A;ATP1A2;COX6A1;TRDN;CYC1;CACNG5;UQCR10;COX4I1;CACNA1F;UQCRQ;COX7C;COX5B;ATP2A3;ATP2A1;UQCR11;COX7B;ATP1A3;COX7A1;UQCRFS1;COX7A2;UQCRH;COX5A;UQCRB;COX6B1	L5-6NP
111	WikiPathway_2023_Human__Canonical And Non Canonical Notch Signaling WP3845	-0.465871	-2.11999	0.00181818	0.0252111	0.825	9/21	7.92%	MAML3;NOTCH1;DLL3;LEF1;NOTCH3;MAML2;HES1;NOTCH2;HEY1	L5-6NP
112	KEGG_2021_Human__Amyotrophic lateral sclerosis	-0.21058	-2.1141	0	0.0261351	0.842	140/315	32.86%	ATG101;NDUFA2;NDUFB11;COX8A;NDUFC2;GPX3;ADRM1;NDUFA13;NDUFB10;NDUFB7;ERBB4;ATP5PO;NDUFS3;PSMB6;COX6A1;CHCHD10;PFN1;TUBB6;HAP1;CYC1;ATP5MC1;CAT;TUBA4A;UQCR10;TUBB2A;DNAL4;COX4I1;DNAH5;GRIN2C;UQCRQ;PSMC3;NDUFB3;COX7C;SIGMAR1;NXT1;COX5B;CASP1;DCTN3;NDUFB8;ATP5MC3;ATP5F1D;TOMM40L;NDUFA11;NDUFA1;PSMD8;TUBB4B;TUBA1B;GPX7;SOD1;UQCR11;COX7B;ATP5PF;NDUFS7;NDUFA4;NEFM;DAXX;TUBB4A;NDUFB2;RAB39B;PSMA7;DNAH3;…	L5-6NP
113	GO_Biological_Process_2023__Regulation Of ERK1 And ERK2 Cascade (GO:0070372)	-0.243906	-2.10945	0	0.0270512	0.856	52/162	16.77%	SYK;MUSK;KDR;NPNT;HTR2B;GCNT2;FGFR3;FGFR2;GSTP1;FBLN1;NOTCH1;PTPRC;TLR4;PDGFD;CSF1R;LYN;P2RY6;DUSP10;ERBB4;BMP2;CEACAM1;EGFR;FGFR4;NTRK3;CIB1;NOTCH2;ROR2;GLIPR2;CNKSR3;ARHGAP8;SEMA7A;HLA-DRB1;ADRA1D;CXCL17;PDGFRB;APOE;DDT;DDR1;IGF1;CD4;ANGPT1;TIMP3;PHB2;HRAS;OPRM1;RGS14;PRKD2;IL26;PHB1;NECAB2;MT3;EZR	L5-6NP
114	GO_Molecular_Function_2023__Amino Acid Binding (GO:0016597)	0.364947	2.10907	0.00262467	0.0958137	0.848	16/30	25.68%	CASR;NOS2;GLDC;SHMT2;GLRA1;AARS2;ASS1;SESN2;SHMT1;CAD;SRR;DDAH1;GLRA2;NOS1;GRIN1;CASTOR2	L5-6NP
115	GO_Biological_Process_2023__Negative Regulation Of Neurogenesis (GO:0050768)	-0.457655	-2.1046	0.00357143	0.0279025	0.873	21/21	54.31%	PAX6;NOTCH1;LRP4;REST;GORASP1;B2M;YWHAH;THY1;DYNLT1;EFNB3;GDI1;PTN;DPYSL5;MBD1;MCF2;SORL1;NF1;RUFY3;HOOK3;PTEN;RAPGEF2	L5-6NP
116	GO_Cellular_Component_2023__U2 snRNP (GO:0005686)	-0.42679	-2.10443	0	0.0276375	0.873	18/24	37.67%	SF3B5;SF3B4;SNRPE;PHF5A;SNRPG;SNRPD2;SF3B6;SNRPB;HTATSF1;SF3B2;SNRPD1;SF3A2;SNRPB2;SF3A1;SNIP1;RBMX2;SF3A3;SNRPN	L5-6NP
117	GO_Biological_Process_2023__Sensory Organ Development (GO:0007423)	-0.363607	-2.09919	0	0.0285775	0.884	16/40	13.53%	OLIG2;PAX6;MAFB;ADAMTS18;CHD7;OLIG1;FREM2;SCO2;SOX2;ASCL1;SMOC1;MEIS1;NEUROD6;ATOH7;BHLHE22;PBX3	L5-6NP
118	GO_Biological_Process_2023__U2-type Prespliceosome Assembly (GO:1903241)	-0.43501	-2.08968	0	0.0308192	0.905	17/23	36.12%	SF3B5;SF3B4;SNRPE;PHF5A;SNRPG;SNRPD2;SF3B6;SNRPB;HTATSF1;SF3B2;SNRPD1;SF3A2;SNRPB2;SF3A1;SNIP1;RBMX2;SF3A3	L5-6NP
119	GO_Biological_Process_2023__Regulation Of Platelet Activation (GO:0010543)	0.458921	2.08491	0.00416667	0.107806	0.884	9/18	10.26%	NRG1;TXK;PDGFRA;SELP;PLA2G4A;PLEK;TEC;FLNA;PDGFB	L5-6NP
120	GO_Molecular_Function_2023__Active Monoatomic Ion Transmembrane Transporter Activity (GO:0022853)	-0.48701	-2.07529	0.00361664	0.0344004	0.923	11/17	20.23%	COX8A;UQCR10;COX4I1;COX7C;COX5B;COX7B;COX7A1;UQCRH;COX5A;UQCRB;COX6B1	L5-6NP
121	GO_Biological_Process_2023__Negative Regulation Of Neuron Differentiation (GO:0045665)	-0.492451	-2.06777	0.00507614	0.0360288	0.929	9/17	16.85%	BMP7;TUNAR;SOX2;REST;HES1;HEY1;SOX9;CALR;B2M	L5-6NP
122	GO_Cellular_Component_2023__Clathrin-Coated Endocytic Vesicle Membrane (GO:0030669)	-0.35089	-2.06765	0.00167504	0.0357186	0.929	17/42	16.28%	CD9;LRP2;F3;TGFA;EGFR;LDLRAP1;ROR2;HLA-DRB1;APOE;SYT2;SYT9;CFTR;CD4;AP2M1;VAMP2;FZD4;AP2S1	L5-6NP
123	GO_Biological_Process_2023__Regulation Of Kinase Activity (GO:0043549)	-0.301085	-2.05902	0	0.0379106	0.943	23/68	12.76%	MUSK;KDR;FGFR3;FGFR2;CSF1R;ERBB4;ERBB3;EGFR;FGFR4;CDKN1C;NTRK3;ROR2;MERTK;SMG8;MET;HLA-DRB1;PDGFRB;TTN;DDR1;CD4;EMP2;PLCE1;SOD1	L5-6NP
124	GO_Molecular_Function_2023__Proton Transmembrane Transporter Activity (GO:0015078)	-0.381477	-2.05862	0.00168634	0.0376517	0.945	17/32	24.08%	MFSD3;COX8A;ATP6V1F;UQCR10;COX4I1;COX7C;COX5B;COX7B;SLC46A1;NOX5;COX7A1;UQCRH;COX5A;UQCRB;COX6B1;COX15;CTNS	L5-6NP
125	GO_Biological_Process_2023__Superoxide Metabolic Process (GO:0006801)	-0.450073	-2.05119	0	0.0397207	0.952	14/22	24.27%	NOXO1;NOX4;TAFA4;CYBA;PREX1;PRDX2;DUOX1;SOD1;NOX5;MT3;ATP7A;NQO1;PRDX1;NOXA1	L5-6NP
126	MSigDB_Hallmark_2020__Interferon Alpha Response	0.270352	2.04937	0.00254453	0.12919	0.933	39/74	27.56%	IFI44;EPSTI1;DDX60;SELL;IFI44L;IRF9;GBP2;CD74;TXNIP;RNF31;PARP14;PARP9;USP18;LGALS3BP;OAS1;PSME2;IFIT3;IL15;TMEM140;MX1;RSAD2;IFITM3;ELF1;TRIM14;HERC6;CMPK2;MVB12A;IRF1;MOV10;LAP3;TRIM25;PLSCR1;STAT2;OGFR;CMTR1;TRIM26;RIPK2;C1S;IRF2	L5-6NP
127	GO_Cellular_Component_2023__Focal Adhesion (GO:0005925)	-0.202906	-2.04607	0	0.0409215	0.956	172/341	39.05%	TMEM98;ITGA2;FGFR3;CD9;SHROOM4;EFS;ANXA1;ITGB4;PTPRC;TSPAN4;HSPB1;ADGRE5;CSRP1;TNS1;CORO1B;NEDD9;PGM5;CAV1;EGFR;CAV2;YES1;PFN1;CAV3;ITGA1;ITGB5;AIF1L;MSN;CAT;RPL3;ARHGAP24;FBLN7;RPS16;RPS13;RPL10A;ASAP3;RPS15;RPS4X;CD81;SORBS3;LIMS2;RPL7A;PDLIM7;ARMC5;RPL19;PDGFRB;ARF6;ARL2;RPL13A;JUP;ARPC1B;RPL9;VIM;GFRAL;RPS17;RPL8;ITGA5;RPS18;HSPA1A;RHOG;RPL18;CALR;SLC4A2;SNTB1;RPS11;RPLP2;RPS14;RPLP1;DYNLL1;R…	L5-6NP
128	GO_Biological_Process_2023__Chaperone-Mediated Protein Complex Assembly (GO:0051131)	-0.463347	-2.04478	0.00177936	0.0409703	0.956	17/19	44.96%	PFDN6;BBS12;PSMG3;HSPA1A;HOPX;LONP1;TMEM35A;HSP90AB1;HSP90AA1;CCT2;NDUFAF1;PSMG1;CLU;HSPD1;MKKS;HSPA4;PTGES3	L5-6NP
129	GO_Biological_Process_2023__Microtubule Polymerization Or Depolymerization (GO:0031109)	-0.450927	-2.04264	0.00173611	0.0412421	0.959	17/21	43.93%	TPPP3;MAP7D3;KIF2C;NCKAP5;STMND1;FGF13;KIF24;STMN1;KATNB1;PIN1;STMN4;TPPP;NCKAP5L;KIF2A;STMN3;STMN2;MAP4	L5-6NP
130	GO_Biological_Process_2023__Protein Depolymerization (GO:0051261)	-0.437186	-2.04186	0.00346021	0.0410653	0.96	17/23	36.66%	KIF2C;NCKAP5;STMND1;KIF24;CFL2;STMN1;VPS4A;GSN;TWF1;KATNB1;STMN4;WDR1;TWF2;DSTN;NCKAP5L;KIF2A;STMN3	L5-6NP
131	WikiPathway_2023_Human__G1 To S Cell Cycle Control WP45	-0.321647	-2.03834	0.00164745	0.0418406	0.964	21/50	20.48%	CDKN2A;CCNB1;CREB3L3;CDKN1C;MCM7;E2F1;POLA2;CCNA1;CCNE2;MCM3;CCNE1;CREB3L1;GADD45A;CREB3;CDKN2D;CDKN1B;TP53;RPA3;POLE2;PCNA;PRIM1	L5-6NP
132	WikiPathway_2023_Human__Translation Factors WP107	-0.329907	-2.03722	0	0.0418299	0.965	37/48	48.22%	EEF1B2;EIF6;EIF1;EIF5A;EIF4A2;EEF2;EIF3G;EEF1A2;EIF4EBP1;EIF3C;EIF4G1;EIF4A1;GSPT2;EIF1AY;EEF1A1;EIF3I;EIF5;EIF1AX;EIF3D;EIF2B2;EIF2B1;EIF4EBP2;CLUH;EIF2S2;EEF1D;EIF4H;EIF3F;EIF3H;EIF2AK3;ETF1;EIF3J;EIF2S1;PAIP1;EIF3E;EIF3A;EIF4B;EIF4E	L5-6NP
133	GO_Biological_Process_2023__Mesenchymal Cell Differentiation (GO:0048762)	-0.347547	-2.02721	0.00473186	0.0446152	0.978	14/41	11.92%	BMP7;HTR2B;FGFR2;NOTCH1;HMGA2;LEF1;BMP2;RANBP3L;WNT4;HGF;IGF1;HNRNPAB;SOX9;TRIM28	L5-6NP
134	GO_Cellular_Component_2023__Cell-Substrate Junction (GO:0030055)	-0.200348	-2.02523	0	0.0450954	0.979	156/345	34.69%	TMEM98;ITGA2;FGFR3;CD9;SHROOM4;EFS;ANXA1;ITGB4;PTPRC;TSPAN4;HSPB1;ADGRE5;CSRP1;TNS1;CORO1B;NEDD9;PGM5;CAV1;EGFR;EPPK1;CAV2;YES1;PFN1;CAV3;ITGA1;ITGB5;AIF1L;MSN;CAT;RPL3;ARHGAP24;FBLN7;RPS16;RPS13;RPL10A;ASAP3;RPS15;RPS4X;CD81;SORBS3;LIMS2;RPL7A;PDLIM7;ARMC5;RPL19;PDGFRB;ARF6;ARL2;RPL13A;JUP;ARPC1B;RPL9;VIM;GFRAL;RPS17;RPL8;ITGA5;RPS18;HSPA1A;RHOG;RPL18;CALR;SLC4A2;SNTB1;RPS11;RPLP2;RPS14;RPLP1;DY…	L5-6NP
135	WikiPathway_2023_Human__Photodynamic Therapy Induced NF kB Survival Signaling WP3617	0.447725	2.02486	0	0.146651	0.956	11/16	27.08%	TNFRSF1A;ICAM1;CCND1;VEGFA;RELB;BIRC3;BCL2L2;TRAF6;RELA;IKBKB;REL	L5-6NP
136	MSigDB_Hallmark_2020__Hypoxia	-0.235995	-2.02439	0	0.0450565	0.979	59/155	22.92%	DDIT4;HAS1;TIPARP;GCNT2;CHST3;ENO3;F3;ATF3;FOS;NDRG1;ANGPTL4;SLC25A1;CAV1;EGFR;CDKN1C;GPC3;GALK1;CCN5;MAFF;ETS1;LOX;TPI1;ILVBL;B3GALT6;PRDX5;GCK;CITED2;PKLR;CP;SDC4;DCN;TPBG;BTG1;ALDOC;GAPDH;PPP1R3C;MT1E;MT2A;EFNA3;ALDOA;KDELR3;MIF;GLRX;PLIN2;BHLHE40;PPP1R15A;CDKN1B;BCAN;SRPX;MYH9;ERRFI1;ATP7A;PNRC1;HSPA5;PLAUR;LDHA;ENO2;KLF6;ENO1	L5-6NP
137	GO_Biological_Process_2023__Regulation Of Ruffle Assembly (GO:1900027)	-0.452247	-2.0243	0.00337838	0.0446933	0.98	16/20	42.12%	CAV1;PFN1;KANK1;ARHGAP24;P2RY12;EPS8;HRAS;UXT;CARMIL2;PFN2;EPS8L2;P2RX4;FAM98A;DEF8;RDX;PLEKHM1	L5-6NP
138	GO_Biological_Process_2023__Negative Regulation Of Cell Population Proliferation (GO:0008285)	-0.205314	-2.02328	0	0.044649	0.981	84/270	19.89%	ST18;CDKN2A;ATG101;SH3BP4;RGCC;SST;NOX4;PROX1;GSTP1;GREM1;FBLN1;NOTCH1;IGFBP6;KANK2;LYN;EEF1E1;BMP5;SCIN;ACVR1C;DUSP10;ERBB4;SOX2;IGFBP5;BMP2;H2AC6;EPPK1;CDKN1C;TMIGD3;REST;CTBP2;HES1;ATF5;ITGA1;ETS1;MN1;CIB1;VIP;PTPRK;NME1;ADRA1D;FABP7;FUZ;E2F1;APOD;APOE;BTG1;ZBTB7C;OGN;ADAMTS1;HPN;PLG;SOX9;HSPA1A;TRIB1;CYP1B1;CCN3;B4GALT7;HRAS;OPRM1;SFRP4;RFPL1;DYNLL1;ATRAID;AXIN2;PIM2;CDKN2D;IL26;NACC2;PHB1;TI…	L5-6NP
139	GO_Cellular_Component_2023__Clathrin-Coated Endocytic Vesicle (GO:0045334)	-0.314441	-2.01893	0.00495868	0.045892	0.983	22/53	21.72%	MYO1E;CD9;LRP2;F3;TGFA;EGFR;LDLRAP1;ROR2;HLA-DRB1;APOE;SYT2;SYT9;CFTR;CD4;AP2M1;CLTCL1;VAMP2;FZD4;AP2S1;HBEGF;DVL2;SFTPD	L5-6NP
140	GO_Biological_Process_2023__Regulation Of Receptor-Mediated Endocytosis (GO:0048259)	-0.391317	-2.01389	0.00662252	0.0471604	0.984	25/27	55.28%	F3;C3;LDLRAP1;APOC1;ARF6;PROM2;B2M;LRPAP1;FLOT1;RAC1;ARF1;CLU;UNC45A;HIP1R;HIP1;HNRNPK;TNK2;PPT1;BMP2K;PICALM;CBL;BICD1;SGIP1;MKLN1;PIK3CB	L5-6NP
141	KEGG_2021_Human__Hematopoietic cell lineage	-0.379025	-2.0126	0	0.0471242	0.985	15/33	12.73%	CD22;ITGA2;IL4R;CD9;CSF1R;ITGAM;ITGA1;CD5;HLA-DRB1;CR1;CD4;CSF3R;ITGA5;IL11RA;CD38	L5-6NP
142	GO_Biological_Process_2023__Inflammatory Response (GO:0006954)	0.230304	2.00722	0	0.159513	0.972	29/103	11.17%	KIT;TNFRSF1A;FPR1;ADCY8;NOS2;C5AR1;TLR2;ACKR1;FPR2;APOL2;CIITA;TNFSF4;LTB4R;CD40;CD44;AZU1;SLC11A1;CEBPB;CYBB;IL10RB;TACR1;WNT5A;HRH4;IKBKG;NLRC4;F11R;TLR5;GPR68;RELB	L5-6NP
143	WikiPathway_2023_Human__Iron Metabolism Disorders WP5172	-0.503629	-2.00312	0.00364299	0.0504579	0.988	10/15	22.00%	HEPH;HJV;CYBRD1;BCS1L;CP;TFR2;FTH1;UQCRFS1;TF;FTL	L5-6NP
144	GO_Biological_Process_2023__Negative Regulation Of Transposition (GO:0010529)	0.437233	2.00125	0.00692841	0.158898	0.975	10/17	19.07%	SPOCD1;PIWIL4;BTBD18;PIWIL2;TDRD9;MYBL1;TEX15;ZNF93;MOV10;TDRD12	L5-6NP
145	WikiPathway_2023_Human__IL 17 Signaling Pathway WP2112	0.384859	1.99851	0.00480769	0.155298	0.975	13/24	26.74%	IL17RB;CEBPB;NFKBIB;IKBKG;CEBPD;SP1;MAP3K14;IL17RA;TRAF3IP2;TRAF6;RELA;IKBKB;AKT1	L5-6NP
146	MSigDB_Hallmark_2020__Interferon Gamma Response	0.212587	1.99592	0.00298507	0.152529	0.979	34/137	9.58%	IFI44;EPSTI1;ST8SIA4;XAF1;BANK1;FPR1;IL18BP;DDX60;IFI44L;IRF9;CD74;VAMP8;SELP;TXNIP;CD86;RNF31;CIITA;PARP14;NLRC5;PLA2G4A;CD40;PTPN6;PIM1;C1R;USP18;LGALS3BP;PSME2;ICAM1;IFIT3;MVP;IL15;FAS;MX1;RSAD2	L5-6NP
147	GO_Molecular_Function_2023__Hormone Activity (GO:0005179)	-0.429083	-1.99565	0.00332226	0.0529193	0.99	12/23	14.05%	CRH;SST;INSL6;GRP;ASIP;VGF;GNRH1;CCK;VIP;AGT;IGF1;ERFE	L5-6NP
148	GO_Biological_Process_2023__Regulation Of Interleukin-4 Production (GO:0032673)	0.471924	1.99455	0.00445434	0.148384	0.979	9/15	15.59%	HLA-E;RARA;CD86;TNFSF4;CEBPB;ZFPM1;DDIT3;ZP3;PRKCQ	L5-6NP
149	GO_Biological_Process_2023__Zymogen Activation (GO:0031638)	0.36782	1.98391	0.00475059	0.154232	0.983	14/27	20.94%	PRSS12;VSIR;PLAT;C1R;OMA1;NLRC4;CTSH;TBC1D10A;IFI16;PRSS3;FURIN;BAK1;CASP9;C1RL	L5-6NP
150	WikiPathway_2023_Human__Nuclear Receptors In Lipid Metabolism And Toxicity WP299	0.431403	1.97844	0.00691244	0.154828	0.988	9/18	14.22%	NR1H4;RARA;NR1I3;ABCC2;ABCG5;PPARA;PPARG;ABCA1;RARG	L5-6NP
151	GO_Biological_Process_2023__Enzyme-Linked Receptor Protein Signaling Pathway (GO:0007167)	-0.25993	-1.97708	0	0.0601045	0.994	26/90	11.52%	SYK;MUSK;KDR;FGFR3;FGFR2;EFS;CSF1R;LYN;ERBB4;NEDD9;ERBB3;EGFR;BLNK;FGFR4;YES1;ANGPTL1;NTRK3;SAMD10;ROR2;MERTK;MET;PDGFRB;DDR1;CD4;GFRA2;GUCY2D	L5-6NP
152	GO_Cellular_Component_2023__U2-type Precatalytic Spliceosome (GO:0071005)	-0.318192	-1.97432	0.00162602	0.0608574	0.995	32/49	38.81%	SF3B5;SF3B4;SNRPE;PHF5A;LSM4;SNRPG;SNRPD2;LSM7;SNU13;PRPF31;RNF113A;SNRPB;LSM3;LSM2;SART1;SF3B2;SNRPD1;SF3A2;ZMAT2;SNRPB2;SF3A1;LSM5;SNIP1;PRPF4;RBMX2;MFAP1;PRPF38A;DHX16;SF3A3;PRPF8;TXNL4A;WBP4	L5-6NP
153	GO_Cellular_Component_2023__Precatalytic Spliceosome (GO:0071011)	-0.314217	-1.97424	0.00163132	0.0604109	0.995	33/51	38.81%	SF3B5;SF3B4;SNRPE;PHF5A;LSM4;SNRPG;SNRPD2;LSM7;SNU13;SF3B6;PRPF31;RNF113A;SNRPB;LSM3;LSM2;SART1;SF3B2;SNRPD1;SF3A2;ZMAT2;SNRPB2;SF3A1;LSM5;SNIP1;PRPF4;RBMX2;MFAP1;PRPF38A;DHX16;SF3A3;PRPF8;TXNL4A;WBP4	L5-6NP
154	GO_Biological_Process_2023__Myeloid Cell Development (GO:0061515)	0.462408	1.97001	0.00671141	0.157684	0.99	10/15	26.98%	KIT;TLR2;CEBPB;FLNA;NCKAP1L;ZNF385A;ALAS1;SRC;MED1;SH2B3	L5-6NP
155	GO_Cellular_Component_2023__Spliceosomal tri-snRNP Complex (GO:0097526)	-0.352721	-1.96326	0.00329489	0.0642218	0.996	24/35	38.48%	SNRPE;LSM4;SNRPG;SNRPD2;LSM7;SNU13;PRPF31;RBM42;SNRPA;SNRPB;TXNL4B;LSM3;LSM2;SART1;SNRPD1;ZMAT2;PPIH;LSM5;SNRNP27;PRPF4;DDX23;SNRPN;PRPF8;TXNL4A	L5-6NP
156	GO_Cellular_Component_2023__U4/U6 X U5 tri-snRNP Complex (GO:0046540)	-0.352721	-1.96326	0.00329489	0.0642218	0.996	24/35	38.48%	SNRPE;LSM4;SNRPG;SNRPD2;LSM7;SNU13;PRPF31;RBM42;SNRPA;SNRPB;TXNL4B;LSM3;LSM2;SART1;SNRPD1;ZMAT2;PPIH;LSM5;SNRNP27;PRPF4;DDX23;SNRPN;PRPF8;TXNL4A	L5-6NP
157	GO_Biological_Process_2023__Regulation Of Type II Interferon Production (GO:0032649)	0.297998	1.96218	0.00246914	0.160281	0.993	16/46	12.30%	NR1H4;TXK;VSIR;IL12RB1;RARA;TNFSF4;SLC11A1;BTN3A1;BTN3A2;PTPN22;ZFPM1;IRGM;PDCD1LG2;DDIT3;ZP3;INHA	L5-6NP
158	GO_Molecular_Function_2023__Serine-Type Peptidase Activity (GO:0008236)	-0.294825	-1.95227	0.00315457	0.0691318	0.996	24/59	17.91%	KLK4;KLK6;KLK10;PCSK6;F12;HABP2;CELA2B;HTRA1;KLK15;PRSS48;LPA;HGF;HPN;ADAM8;PLG;BMP1;HTRA2;CFD;TLL2;PCSK4;DPP4;F10;SEC11C;RHBDL1	L5-6NP
159	GO_Cellular_Component_2023__Collagen-Containing Extracellular Matrix (GO:0062023)	-0.211211	-1.947	0	0.0713384	0.996	74/212	19.04%	C1QB;RARRES2;NPNT;FGFR2;ANXA1;GREM1;FBLN1;ITIH5;ADAMTS4;CHADL;COL4A5;FREM2;PCSK6;SERPINB8;ANGPTL2;COL9A2;ANGPTL4;COL20A1;SEMA3B;SMOC1;ANGPTL1;CBLN4;F12;COL5A3;MXRA5;LOX;THBS2;HTRA1;LGALS1;PRELP;EDIL3;SEMA7A;LAMA3;LAMA1;COL9A3;HMCN2;DCN;APOE;SPARC;AGT;ASPN;OGN;ADAMTS1;SERPINB1;PLG;S100A6;LOXL1;ANGPT1;CTSD;TIMP3;LAMA2;GDF10;COL16A1;SERPINE2;CSTB;EFEMP2;CTSZ;FBN2;IL7;ITIH4;ADAMTS9;COL4A4;MST1;MMP28;…	L5-6NP
160	GO_Biological_Process_2023__Protein Stabilization (GO:0050821)	-0.218039	-1.94545	0	0.0716031	0.996	110/181	44.96%	PFDN6;NOP53;PFN1;MCM8;PIH1D2;CCT7;IGF1;GAPDH;CRYAB;HSPA1A;CALR;PHB2;SMAD7;PDRG1;BAG1;UXT;PIM2;RPS7;DVL1;GRN;TELO2;WIZ;PHB1;SWSAP1;STUB1;MT3;PFN2;TAF9B;RPL11;RPL5;PIH1D1;GET1;COA8;PEX19;HSP90AB1;VBP1;TESC;TBL1X;CHEK2;POLR2E;GLMP;WFS1;PARVA;PFDN4;USP27X;HSP90AA1;DNAAF2;PFDN2;USP19;PARK7;WNT10B;ZBED3;RUVBL2;TCP1;ATP1B1;PINK1;DVL3;SOX4;PDCL3;TTI2;PPIB;IFT46;RPL17;CCT2;WDR81;CDC37;GOLGA7;PIN1;RUVBL1;C…	L5-6NP
161	MSigDB_Hallmark_2020__Myogenesis	-0.237801	-1.94494	0.00282486	0.0713903	0.997	66/133	34.12%	EFS;OCEL1;ITGB4;ENO3;NOTCH1;GPX3;ERBB3;LDB3;CAV3;TNNC2;ITGB5;TCAP;CHRNB1;SORBS3;MYH3;PDLIM7;APOD;SYNGR2;MYH11;SPARC;IGF1;SCD;CRYAB;ITGA7;PPP1R3C;CKB;ATP2A1;CFD;LAMA2;CKMT2;BAG1;COX7A1;GABARAPL2;EIF4A2;BHLHE40;FKBP1B;FABP3;TGFB1;ATP6AP1;MYH9;HSPB8;ACHE;NQO1;MAPK12;HBEGF;SCHIP1;MYL6B;TAGLN;DMPK;SIRT2;IFRD1;GSN;SLC6A8;MYO1C;KCNH2;RIT1;COL4A2;AGRN;AK1;WWTR1;TSC2;MEF2D;SGCD;CNN3;VIPR1;PRNP	L5-6NP
162	GO_Biological_Process_2023__Cardiac Muscle Tissue Development (GO:0048738)	-0.35131	-1.93697	0.00351494	0.075257	0.997	15/33	17.87%	BMP7;MESP1;GREM1;NOTCH1;BMP5;BMP2;TCAP;NOTCH2;HEY1;AKAP13;TTN;SIRT6;ADAMTS9;NDUFV2;MYOCD	L5-6NP
163	GO_Biological_Process_2023__Positive Regulation Of Mitochondrion Organization (GO:0010822)	-0.311853	-1.93676	0.00168634	0.0748533	0.997	24/48	29.38%	KDR;CHCHD10;PPIF;DCN;AURKA;MOAP1;BOK;HTRA2;PGAM5;PLD6;BAX;FIS1;TP53;PLAUR;MLLT11;GSK3A;BCL2L11;HRK;ZNF205;BNIP3;PARK7;PINK1;MIEF1;BAD	L5-6NP
164	KEGG_2021_Human__One carbon pool by folate	0.422536	1.93599	0.00252525	0.184227	0.995	15/18	40.90%	ALDH1L1;SHMT2;AMT;MTHFS;FTCD;SHMT1;MTHFD2;GART;ALDH1L2;MTHFR;MTHFD2L;ATIC;MTFMT;MTHFD1L;MTR	L5-6NP
165	KEGG_2021_Human__Complement and coagulation cascades	-0.336766	-1.93458	0.00168634	0.0755131	0.997	20/39	21.05%	C1QB;CFHR5;F3;C3;C4BPA;ITGAM;F12;SERPIND1;CFH;CR1;F5;PLG;CFHR4;CFD;F10;C5;PROCR;A2M;SERPING1;PLAUR	L5-6NP
166	MSigDB_Hallmark_2020__Fatty Acid Metabolism	-0.237697	-1.93428	0.00147493	0.0751136	0.997	69/125	37.60%	PSME1;ENO3;ACSS1;AADAT;CPT2;GAD2;HSD17B10;PCBD1;LGALS1;ECH1;ACSL5;UROD;IDH3G;UBE2L6;NSDHL;CBR1;EPHX1;H2AZ1;ACADS;NTHL1;MDH2;ALDOA;ACSM3;MIF;IDH3B;CA2;TP53INP2;ACOT2;FASN;GCDH;GABARAPL1;HSD17B7;YWHAH;DHCR24;PDHB;LDHA;PRDX6;ENO2;HCCS;HSP90AA1;ADIPOR2;ALDH1A1;IDI1;GRHPR;ACAT2;GLUL;HSD17B11;NCAPH2;SDHD;RETSAT;EHHADH;ACOT8;ACAA1;ERP29;UROS;KMT5A;RDH11;HMGCS1;OSTC;FH;SERINC1;MDH1;CD36;PDHA1;PTPRG;IDH1;…	L5-6NP
167	KEGG_2021_Human__Pertussis	-0.318483	-1.9318	0.00485437	0.0759163	0.998	24/47	28.07%	C1QB;TLR4;C3;FOS;IRF8;C4BPA;ITGAM;IRF3;CASP1;ITGA5;CFL2;MAPK11;TICAM1;C5;CFL1;CALM3;MAPK12;MAPK3;SERPING1;CALM2;NOD1;IRAK1;CALM1;RHOA	L5-6NP
168	MSigDB_Hallmark_2020__mTORC1 Signaling	-0.218183	-1.92462	0	0.079656	0.998	125/182	49.05%	DDIT4;SDF2L1;CD9;RRP9;EEF1E1;FKBP2;IGFBP5;ATP5MC1;EBP;TUBA4A;TPI1;INSIG1;AURKA;CYP51A1;PHGDH;SLC7A11;SCD;GAPDH;HSPE1;CALR;TMEM97;TM7SF2;CACYBP;ALDOA;GLRX;TUBG1;PPIA;CORO1A;ABCF2;BHLHE40;HMBS;ARPC5L;PPP1R15A;PSMB5;PIK3R3;PRDX1;HSPA5;YKT6;DHCR24;LDHA;MLLT11;BTG2;ENO1;MCM4;TOMM40;PDAP1;DDX39A;ADIPOR2;IFRD1;CCNG1;SLC2A1;IDI1;ACLY;GOT1;CTSC;SKAP2;RIT1;PSMA4;LDLR;COPS5;DHFR;SLC2A3;PSAT1;PSMC4;STARD4;EG…	L5-6NP
169	GO_Molecular_Function_2023__Neuropeptide Receptor Activity (GO:0008188)	-0.423259	-1.92283	0.0017301	0.0800529	0.998	9/20	6.61%	GALR1;GPR171;NTSR1;SSTR1;NPY1R;NPY5R;NTSR2;KISS1R;SORCS3	L5-6NP
170	KEGG_2021_Human__Retrograde endocannabinoid signaling	-0.236716	-1.92197	0	0.0798948	0.998	57/122	34.81%	NDUFA2;GNG3;GABRQ;NDUFB11;NDUFC2;NDUFA13;NDUFB10;NDUFB7;CNR1;GRM1;NDUFS3;GNG4;PLCB2;GNG2;CACNA1F;NDUFB3;NDUFB8;NDUFA11;NDUFA1;ADCY7;NDUFS7;NDUFA4;NDUFB2;PTGS2;GNG12;MAPK11;GNB2;NDUFA3;ITPR3;ADCY5;NDUFV2;NDUFA6;GABRA2;MAPK12;NDUFB9;MAPK3;NDUFS6;NDUFS5;NDUFS8;NDUFC1;NDUFV1;NDUFS2;NDUFA8;GABRD;FAAH;NDUFAB1;NDUFB1;NDUFB5;PLCB4;NDUFB4;KCNJ9;NDUFB6;GNB4;NDUFA9;GABRA1;SLC17A7;DAGLA	L5-6NP
171	GO_Cellular_Component_2023__Extracellular Vesicle (GO:1903561)	-0.312373	-1.92178	0.0049505	0.0794386	0.998	18/48	16.12%	CD9;ATP1A2;SLC39A12;TUBB2A;PRELP;PROM1;EDIL3;E2F1;APOE;F5;OGN;CBR1;TUBB4B;RAB3A;SERPINE2;PROM2;EFEMP2;ATP1A3	L5-6NP
172	GO_Biological_Process_2023__Regulation Of Release Of Cytochrome C From Mitochondria (GO:0090199)	-0.366714	-1.91488	0.00168634	0.0827637	0.999	17/30	29.38%	PRELID1;TRIAP1;PSMD10;PPIF;HGF;IGF1;MOAP1;BAX;TP53;PLAUR;MLLT11;BCL2L11;GHITM;HRK;BNIP3;PINK1;BAD	L5-6NP
173	GO_Biological_Process_2023__Positive Regulation Of Chemokine Production (GO:0032722)	0.370646	1.91037	0.00226244	0.204855	0.998	9/24	6.91%	TLR2;CD74;IL6R;AIRE;TNFSF4;AZU1;LCP1;OAS1;WNT5A	L5-6NP
174	GO_Biological_Process_2023__Negative Regulation Of Supramolecular Fiber Organization (GO:1902904)	-0.285365	-1.90754	0.00624025	0.0866884	0.999	36/67	37.41%	PFDN6;CHADL;SLIT2;SSH3;PFN1;KANK1;CAV3;CIB1;SPEF1;APOE;CRYAB;FGF13;MID1IP1;TUBB4A;PFN2;CORO1A;KANK3;STMN1;HSPA8;VBP1;TPX2;ARPIN;PFDN4;PFDN2;MYADM;CLIP3;APC2;LDLR;TWF1;KATNB1;ARHGEF2;MAPRE1;TWF2;PFDN1;CLU;HIP1R	L5-6NP
175	GO_Cellular_Component_2023__Mitochondrial Envelope (GO:0005740)	-0.233641	-1.90629	0	0.0868904	0.999	68/130	35.77%	PRELID1;DIABLO;NDUFA2;NDUFA13;VRK2;NDUFB7;TRIAP1;NDUFS3;TIMM8A;CHCHD10;TIMM10;BLOC1S1;TIMM8B;CHCHD4;IFI27L2;HAX1;ARL2;TIMM13;NGRN;NDUFA1;STOML2;BOK;CHCHD2;HTRA2;CHCHD5;SOD1;SLC25A4;GATM;IFI27;TMEM14C;SLC8B1;COA6;COA4;NME4;NDUFA6;NDUFAF4;NAT8L;BNIP1;THOP1;TMEM14B;COA7;ATP5F1B;TMEM70;NDUFA8;BNIP3;SDHAF3;ARL2BP;PINK1;NDUFAB1;SDHD;REXO2;GPAM;CYCS;FKBP8;UQCC2;TIMM10B;CYB5R3;COX17;TMEM14A;NDUFB6;VDAC2;…	L5-6NP
176	GO_Cellular_Component_2023__Apical Junction Complex (GO:0043296)	-0.267444	-1.90428	0.00154799	0.0875351	0.999	25/79	14.48%	CLDN1;FRMD4B;SHROOM4;OCEL1;PARD3B;CDH1;EPPK1;CLDN11;FRMPD2;CGNL1;SHROOM1;RAP2B;JUP;TJP2;PARD6A;CLDN10;NECTIN3;AJM1;IGSF5;SH3BP1;TJP3;CLDN15;YBX3;EPCAM;PARD3	L5-6NP
177	WikiPathway_2023_Human__Interactome Of Polycomb Repressive Complex 2 PRC2 WP2916	0.433457	1.90168	0.00460829	0.210281	0.999	16/16	56.70%	TRIM35;ELL;RBBP7;EZH2;EED;STK38;MORC3;SUZ12;RBBP4;BCLAF1;MTF2;AEBP2;SETX;JARID2;THRAP3;EZH1	L5-6NP
178	GO_Cellular_Component_2023__U12-type Spliceosomal Complex (GO:0005689)	-0.384205	-1.90142	0.005	0.0887889	1	14/25	26.64%	SNRNP25;SF3B5;SF3B4;SNRPE;PHF5A;SNRPG;SNRPD2;LSM7;SF3B6;SNRPB;SNRNP35;SF3B2;SNRPD1;ZCRB1	L5-6NP
179	GO_Cellular_Component_2023__9+2 Motile Cilium (GO:0097729)	0.283026	1.90077	0.0025641	0.205973	1	25/47	28.78%	CFAP52;TEKT5;CFAP58;TCTE1;DNAH2;CABCOCO1;TACR1;DCDC2C;RSPH9;QRICH2;TEKT3;LYZL4;DNAH11;AK8;CFAP74;DNAH17;SAXO1;FLACC1;TTLL3;SAXO2;DNAH1;RPGR;CCDC181;DNAH9;CFAP221	L5-6NP
180	GO_Biological_Process_2023__Negative Regulation Of Cell Cycle (GO:0045786)	-0.294703	-1.89956	0.00330579	0.0893283	1	30/55	33.00%	CDKN2A;BMP7;SUV39H1;BMP2;CDKN1C;LATS2;PTPRK;BTG1;PTPN3;HTRA2;RNF167;RFPL1;MAD2L1;HEXIM2;TP53BP2;RRP8;MYOCD;CDKN1B;SCRIB;RHOB;TGFB1;BTG2;BRCA1;HEXIM1;MEN1;BRINP3;ZBTB17;CDK6;TAF6;THAP5	L5-6NP
181	GO_Biological_Process_2023__Response To Type II Interferon (GO:0034341)	0.314023	1.89927	0.00729927	0.202539	1	11/36	6.93%	CD58;SP100;TLR2;GBP2;CD74;IL12RB1;CIITA;CD40;SLC11A1;WNT5A;AQP4	L5-6NP
182	GO_Biological_Process_2023__Myelination (GO:0042552)	-0.314191	-1.89615	0.00670017	0.0908161	1	19/43	25.46%	MYRF;KLK6;ADGRG6;BCAS1;MPZ;CMTM8;PLLP;PMP22;GAL3ST1;ACSBG1;MARVELD1;MAL;PARD3;PLP1;SOX10;AMIGO1;DEGS1;SIRT2;MAL2	L5-6NP
183	MSigDB_Hallmark_2020__Unfolded Protein Response	-0.239345	-1.894	0.0015083	0.0917454	1	56/108	36.10%	DDIT4;RRP9;ATF3;BANF1;H2AX;YIF1A;NHP2;TUBB2A;EXOSC4;CHAC1;IMP3;CALR;LSM4;EXOSC5;RPS14;CKS1B;KDELR3;SPCS1;EIF4A2;EEF2;GEMIN4;EIF4EBP1;NOP56;TATDN2;POP4;HSPA5;WIPI1;WFS1;ATF4;HYOU1;IFIT1;EIF4G1;EIF4A1;SRPRA;NFYA;LSM1;NOLC1;DNAJB9;NFYB;DNAJA4;SRPRB;SPCS3;ZBTB17;PSAT1;ARFGAP1;CEBPG;DCTN1;ALDH18A1;HERPUD1;ATP6V0D1;SLC7A5;EXOSC1;EDEM1;NOP14;EXOSC9;HSP90B1	L5-6NP
184	GO_Biological_Process_2023__Ventricular Septum Development (GO:0003281)	-0.385858	-1.89366	0.00851789	0.0913557	1	13/26	19.67%	PROX1;SALL1;NOTCH1;SLIT2;HES1;CITED2;HEY1;SMAD7;ZFPM2;ROBO1;SLIT1;TGFBR1;MATR3	L5-6NP
185	GO_Biological_Process_2023__Mitochondrial Transport (GO:0006839)	-0.30478	-1.88717	0.00164474	0.0950267	1	32/51	39.69%	SLC25A5;TIMM10;BCS1L;AIP;PPIF;TOMM5;TIMM8B;TOMM22;TIMM13;TOMM7;TSPO;SLC25A4;TIMM17B;FIS1;BCAP31;TOMM20;TOMM34;HSP90AA1;TIMM17A;TOMM40;BNIP3;TIMM44;DNAJC19;PINK1;BAD;COX18;MFN2;KIFBP;VPS35;BCL2L1;FBXO7;TIMM9	L5-6NP
186	GO_Biological_Process_2023__Protein Insertion Into ER Membrane (GO:0045048)	-0.374406	-1.88474	0.0083612	0.0960706	1	23/28	45.58%	EMC6;NOMO2;GET3;GET4;UBL4A;TMEM147;RAB5IF;GET1;NOMO1;MMGT1;EMC4;NOMO3;EMC7;TRAM1L1;EMC10;SGTA;SEC61A1;NCLN;CAMLG;TMCO1;EMC3;CCDC47;EMC2	L5-6NP
187	GO_Biological_Process_2023__Response To Organic Cyclic Compound (GO:0014070)	-0.344547	-1.88391	0.00650407	0.095951	1	17/33	26.35%	TIPARP;ANXA1;IGFBP5;FGFR4;ESR1;IL18;SPP1;ADA;CYP1B1;CDKN2D;KYNU;DRD4;TGFB1;CHRNB2;PAQR7;SOCS2;ARL6IP5	L5-6NP
188	WikiPathway_2023_Human__Selenium Micronutrient Network WP15	-0.298352	-1.88243	0.00482315	0.0962811	1	20/51	17.10%	GPX3;SELENOP;CAT;SELENOM;SEPHS2;PRDX5;SELENOK;GPX4;HBB;ALOX5;SELENOW;KMO;PRDX2;PLG;SOD1;SELENOS;KYNU;PTGS2;RFK;FLAD1	L5-6NP
189	GO_Biological_Process_2023__Regulation Of Actin Polymerization Or Depolymerization (GO:0008064)	-0.399256	-1.88216	0.00702988	0.0958672	1	14/22	33.45%	DAAM2;PFN1;NAA80;HAX1;FCHSD1;ESAM;SH3BP1;ARHGAP18;PFN2;WAS;BRK1;COTL1;WDR1;GBA2	L5-6NP
190	GO_Biological_Process_2023__Mitotic Sister Chromatid Cohesion (GO:0007064)	0.446417	1.88192	0.00702576	0.218608	1	14/15	48.32%	DSCC1;SMC1A;NPC1;MAU2;HDAC8;SMC3;ESCO1;RB1;PDS5A;NAA50;PDS5B;STAG2;STAG1;NIPBL	L5-6NP
191	GO_Molecular_Function_2023__G Protein-Coupled Serotonin Receptor Activity (GO:0004993)	0.406417	1.88087	0.0091954	0.209351	1	9/19	12.37%	HTR7;HTR1F;HTR4;HRH4;CHRM3;HTR1A;CHRM5;HTR6;HRH3	L5-6NP
192	GO_Molecular_Function_2023__G Protein-Coupled Amine Receptor Activity (GO:0008227)	0.406417	1.88087	0.0091954	0.209351	1	9/19	12.37%	HTR7;HTR1F;HTR4;HRH4;CHRM3;HTR1A;CHRM5;HTR6;HRH3	L5-6NP
193	GO_Biological_Process_2023__NAD Biosynthetic Process (GO:0009435)	0.426288	1.88008	0	0.205376	1	12/16	34.69%	PARP10;PARP9;NAPRT;SLC22A13;NNMT;NAXD;PARP16;NADSYN1;NAMPT;NMNAT3;PTGIS;SLC5A8	L5-6NP
194	KEGG_2021_Human__Protein digestion and absorption	0.250782	1.87766	0.0026455	0.203281	1	22/63	14.49%	CPB1;SLC3A1;COL14A1;COL21A1;KCNN4;COL27A1;COL6A3;MEP1B;COL5A1;COL8A1;CPB2;COL11A2;COL24A1;ELN;COL4A3;COL19A1;SLC7A9;COL4A1;COL9A1;COL7A1;PRSS3;COL10A1	L5-6NP
195	GO_Molecular_Function_2023__Serine-Type Endopeptidase Activity (GO:0004252)	-0.292137	-1.87667	0.00472441	0.0988333	1	21/51	17.91%	KLK6;PCSK6;F12;HABP2;CELA2B;KLK15;PRSS48;LPA;HGF;HPN;ADAM8;PLG;BMP1;HTRA2;CFD;TLL2;PCSK4;DPP4;F10;SEC11C;RHBDL1	L5-6NP
196	GO_Biological_Process_2023__Antimicrobial Humoral Response (GO:0019730)	-0.407368	-1.87642	0.00169779	0.0984225	1	17/22	34.30%	RARRES2;F3;WFDC3;FAU;GAPDH;FAM3A;WFDC2;ROMO1;RPS19;PGLYRP1;RPL39;CXCL14;HLA-A;COLEC11;PLA2G6;HMGN2;RPL30	L5-6NP
197	GO_Biological_Process_2023__Positive Regulation Of Reactive Oxygen Species Metabolic Process (GO:2000379)	-0.346547	-1.87161	0.00844595	0.101257	1	16/35	18.70%	SYK;GSTP1;TLR4;ITGAM;PLCG2;CYBA;PDGFRB;AGT;CBR1;GADD45A;SOD1;DHRS4;TLR6;ROMO1;TGFB1;TP53	L5-6NP
198	WikiPathway_2023_Human__Spinal Cord Injury WP2431	-0.25811	-1.87142	0.00764526	0.100745	1	37/78	28.08%	C1QB;ANXA1;NOX4;MAG;TLR4;SLIT2;FOS;EGFR;RGMA;PTPRZ1;AQP1;E2F1;MBP;VIM;SOX9;GADD45A;PTGS2;MIF;FKBP1A;SLIT1;E2F5;C5;CDKN1B;RHOB;TGFB1;BCAN;TP53;EGR1;MAPK3;BTG2;NTN1;ARG1;CCNG1;OMG;RTN4R;RHOA;NCAN	L5-6NP
199	GO_Cellular_Component_2023__Cyclin-Dependent Protein Kinase Holoenzyme Complex (GO:0000307)	-0.351513	-1.87007	0.0085034	0.100921	1	20/32	34.19%	CCNB1;CKS2;CDK5R2;CCNE2;CCNE1;CKS1B;CDK5;CDK16;CCNQ;CNPPD1;CCNB3;CCNJ;CCNJL;CCNG1;CDK6;CCNF;CCNI;CDK5R1;CCNG2;CCND2	L5-6NP
200	GO_Biological_Process_2023__Positive Regulation Of Chemotaxis (GO:0050921)	-0.371953	-1.86854	0.00680272	0.101309	1	13/28	18.33%	KDR;RARRES2;HSPB1;NTRK3;PRKD1;MET;P2RY12;PDGFRB;SEMA5A;TMSB4X;PRKD2;ZNF580;TGFB1	L5-6NP
201	KEGG_2021_Human__Bacterial invasion of epithelial cells	-0.264365	-1.86724	0.00313972	0.101802	1	57/75	51.73%	GAB1;ELMO1;CDH1;CAV1;CAV2;CAV3;MET;ARHGEF26;ARPC1B;ITGA5;RHOG;CLTCL1;PXN;ARPC5L;PIK3R3;CTNNA3;ILK;ARPC4;SHC4;ARPC1A;DOCK1;ACTB;ACTG1;ARPC3;FN1;RHOA;ARPC5;PIK3CD;SEPTIN1;BCAR1;RAC1;CLTB;CTNNA1;VCL;CRKL;CTTN;SEPTIN9;CLTA;SEPTIN8;CRK;ELMO2;CTNNB1;PIK3R1;DNM1;WASL;ARPC2;SEPTIN6;ACTR3;ACTR3B;CLTC;ACTR2;CBL;SEPTIN11;CTNNA2;WASF1;PTK2;DNM3	L5-6NP
202	GO_Biological_Process_2023__Positive Regulation Of Cytokine Production (GO:0001819)	0.181308	1.86421	0	0.215504	1	44/189	10.82%	SULF1;CD58;NR1H4;TXK;CGAS;HLA-E;NOS2;TLR2;CD74;IL12RB1;IL6R;AIRE;RARA;SULF2;CD86;AGPAT2;TNFSF4;CD40;SLC11A1;CEBPB;HPSE;DRD2;BTN3A1;CCBE1;CCDC88B;LCP1;BTN3A2;PTPN22;TMEM106A;IKBKE;C1QTNF3;WNT5A;ZFPM1;HHLA2;IL15;AMH;CD6;BCL10;RIGI;ZCCHC3;HSPA1B;DDIT3;TLR5;IL16	L5-6NP
203	GO_Biological_Process_2023__Positive Regulation Of Cellular Metabolic Process (GO:0031325)	-0.326266	-1.86391	0.00811688	0.103585	1	20/38	26.78%	MUSK;PRELID1;SLCO1C1;EEF1E1;CCNB1;PDGFRB;AGT;HPN;CBR1;CHCHD2;GADD45A;MT3;B2M;DHRS4;ROMO1;TP53;DCXR;YPEL3;GHITM;ARG2	L5-6NP
204	GO_Biological_Process_2023__Defense Response To Bacterium (GO:0042742)	0.241022	1.86279	0.00502513	0.212542	1	24/72	13.14%	HLA-E;NOS2;TLR2;GBP2;IL6R;FPR2;NLRP1;SELP;RNF31;AZU1;SLC11A1;CEBPB;LYG2;PRKCD;OAS1;IRGM;HMGB2;NLRC4;MR1;LPO;SHARPIN;STAB2;LYZL4;SHC1	L5-6NP
205	WikiPathway_2023_Human__Hair Follicle Development Cytodifferentiation Part 3 Of 3 WP2840	-0.304355	-1.85207	0.00815661	0.110219	1	16/48	11.13%	SOSTDC1;KLK4;KLK6;NOTCH1;LEF1;FOS;SOX2;IGFBP5;EGFR;FOSB;WIF1;GLI2;NOTCH2;PROM1;IGF1;SOX9	L5-6NP
206	GO_Molecular_Function_2023__Transforming Growth Factor Beta Binding (GO:0050431)	0.436793	1.85146	0.00961538	0.217425	1	10/15	25.24%	TGFBR2;TGFBR3;TGFB3;VASN;LTBP1;LTBP2;ENG;LTBP4;ITGAV;CD109	L5-6NP
207	GO_Biological_Process_2023__Blood Vessel Morphogenesis (GO:0048514)	-0.347242	-1.84914	0.00526316	0.111134	1	16/32	23.71%	SYK;KDR;LRP5;PROX1;CAV1;HES1;LOX;ID1;CYP1B1;SMAD7;ITGB8;TGFBR1;TGFB1;AGGF1;CUL7;EGFL7	L5-6NP
208	KEGG_2021_Human__Cytokine-cytokine receptor interaction	0.227242	1.84907	0.00260417	0.21574	1	23/82	9.57%	BMP6;TNFRSF1A;IL17RB;IL12RB1;IL6R;TGFBR2;GDF6;IL20RB;TNFRSF10B;TNFSF4;BMPR1B;OSMR;CD40;TNFRSF19;IL10RB;TGFB3;NGF;IL15;FAS;TNFRSF25;AMH;RELT;CNTFR	L5-6NP
209	GO_Biological_Process_2023__Protein Import Into Mitochondrial Matrix (GO:0030150)	-0.458656	-1.84703	0.00848896	0.111296	1	11/16	27.00%	TOMM40L;GRPEL1;TIMM17B;ROMO1;GRPEL2;TOMM20;TIMM17A;TOMM40;TIMM50;TIMM44;DNAJC19	L5-6NP
210	GO_Biological_Process_2023__Ribosomal Large Subunit Biogenesis (GO:0042273)	-0.297495	-1.84517	0.00933126	0.112055	1	27/50	31.11%	NOP53;NOP16;MAK16;NLE1;RPL26;RSL24D1;RPL35A;RRS1;RPL10;RPLP0;EIF6;PPAN;RPL11;RPL23A;NOC2L;RPL5;RPL26L1;RPL6;RPL7;MRTO4;RPL14;ZNF622;EBNA1BP2;WDR74;GTF3A;PAK1IP1;MRPL20	L5-6NP
211	GO_Biological_Process_2023__Regulation Of Actin Cytoskeleton Organization (GO:0032956)	-0.260529	-1.84135	0.0048	0.113597	1	26/77	16.77%	DAAM2;CSF1R;NEDD9;RAC3;NOTCH2;RAPGEF3;BAIAP2L1;MLST8;HAX1;PDGFRB;GRHL3;EPS8;ESAM;SH3BP1;RHOG;SLC4A2;HRAS;DYNLL1;ARHGAP18;ARHGDIA;CARMIL2;TESK1;FSCN1;RNH1;CORO1A;EZR	L5-6NP
212	GO_Biological_Process_2023__Heart Development (GO:0007507)	-0.229146	-1.83627	0	0.116705	1	41/115	21.79%	BMP7;HTR2B;MESP1;CHD7;SALL1;NOTCH1;BMP5;TBX19;ERBB4;BMP2;ERBB3;LEFTY1;NTRK3;LDB3;GLI2;GPC3;TCAP;PDLIM2;CITED2;PDLIM7;AKAP13;ID2;SOX9;PLCE1;DYNLL1;ZFPM2;CACYBP;HEG1;BORCS8;DVL1;FKBP1A;PDLIM1;NDUFV2;MYOCD;CDKN1B;TGFBR1;TGFB1;CASP8;TEK;DVL2;SRF	L5-6NP
213	GO_Biological_Process_2023__Ventricular Septum Morphogenesis (GO:0060412)	-0.403503	-1.83543	0.00857633	0.115989	1	11/21	18.28%	PROX1;NOTCH1;SLIT2;HES1;CITED2;HEY1;SMAD7;ZFPM2;ROBO1;SLIT1;TGFBR1	L5-6NP
214	WikiPathway_2023_Human__Peptide GPCRs WP24	0.328011	1.83533	0.00451467	0.229662	1	13/31	10.16%	FPR1;MC4R;C5AR1;ACKR1;FPR2;GRPR;FSHR;TACR1;NMBR;EDNRA;SSTR2;OPRD1;MC1R	L5-6NP
215	WikiPathway_2023_Human__Pathogenic Escherichia Coli Infection WP2272	-0.304156	-1.83338	0.00660066	0.11699	1	24/48	29.08%	CLDN1;TLR4;CDH1;TUBB6;TUBA4A;TUBB2A;ARPC1B;TUBB4B;TUBA1B;TUBB4A;TUBA1A;EZR;WAS;ARPC5L;TUBB;TUBB2B;ARPC4;ARPC1A;ACTB;ACTG1;ARPC3;RHOA;ARPC5;NCL	L5-6NP
216	GO_Biological_Process_2023__Regulation Of MAPK Cascade (GO:0043408)	-0.213001	-1.83311	0.00289436	0.116519	1	52/152	21.34%	SYK;KDR;FGFR3;LPAR1;FGFR2;GSTP1;GREM1;PTPRC;CSF1R;IGFBP6;LYN;REN;VRK2;WDR54;SOX2;BMP2;CEACAM1;GPR37L1;CAV1;EGFR;CAV2;PLCG2;LAMTOR1;CAV3;PSMD10;CD81;HLA-DRB1;ADRA1D;GFRAL;IGF1;CD4;DUSP7;PLCE1;PHB2;HRAS;SOD1;PEBP1;DOK3;ADRA1B;PPIA;GPR37;AVPI1;TRIM5;EPHA8;JCAD;TGFBR1;SPRED3;DUSP5;TEK;MAPK3;DOK4;P2RX7	L5-6NP
217	GO_Biological_Process_2023__Regulation Of Chromosome Segregation (GO:0051983)	0.379531	1.82917	0.00973236	0.233158	1	13/21	31.92%	BUB1;IHO1;HORMAD1;SMC4;CDC6;RMI2;NCAPD2;SMC2;NCAPG2;NCAPD3;CSNK2A2;NUMA1;RAD18	L5-6NP
218	GO_Molecular_Function_2023__Transmembrane Receptor Protein Tyrosine Kinase Activity (GO:0004714)	-0.310813	-1.82704	0.00642055	0.120646	1	14/42	9.75%	MUSK;KDR;FGFR3;FGFR2;CSF1R;ERBB4;EGFR;FGFR4;NTRK3;ROR2;MERTK;MET;PDGFRB;DDR1	L5-6NP
219	WikiPathway_2023_Human__Cardiac Progenitor Differentiation WP2406	-0.404338	-1.82637	0.00519931	0.120499	1	9/21	11.65%	KDR;PAX6;MESP1;NOTCH1;SOX2;ROR2;IGF1;MYLK3;BMP1	L5-6NP
220	MSigDB_Hallmark_2020__Estrogen Response Early	0.189772	1.82429	0.00337838	0.235469	1	70/148	32.33%	TPD52L1;IL17RB;MLPH;CBFA2T3;MINDY1;RARA;FKBP5;GJA1;AR;EGR3;RAB31;SLC7A2;PDLIM3;CD44;MYOF;GLA;CALB2;ZNF185;MAST4;CYP26B1;CELSR1;RET;CCND1;CA12;LRIG1;OVOL2;DHCR7;MYBL1;SLC27A2;XBP1;ELF1;THSD4;MYBBP1A;ISG20L2;ASB13;PEX11A;HR;PODXL;TTC39A;SVIL;B4GALT1;RRP12;MPPED2;SLC22A5;TOB1;PAPSS2;SLC26A2;CELSR2;SLC16A1;TBC1D30;SYT12;SLC19A2;OPN3;PRSS23;KDM4B;NADSYN1;ADCY1;GREB1;ITPK1;SIAH2;RBBP8;SLC37A1;ADCY9;SLC…	L5-6NP
221	GO_Biological_Process_2023__Visual System Development (GO:0150063)	-0.367046	-1.8178	0.00856164	0.124721	1	9/27	5.96%	PAX6;ADAMTS18;C3;FREM2;SCO2;SOX2;ITGAM;SMOC1;MEIS1	L5-6NP
222	GO_Biological_Process_2023__Negative Regulation Of Intrinsic Apoptotic Signaling Pathway (GO:2001243)	-0.285664	-1.81537	0.00495868	0.125145	1	31/51	39.15%	HSPB1;NDUFA13;NDUFS3;PPIF;CREB3L1;HSPA1A;HTRA2;CREB3;YBX3;SELENOS;CDKN2D;PPIA;NOC2L;TPT1;PLAUR;HYOU1;ENO1;DNAJA1;TRIM32;PTTG1IP;PARK7;CCAR2;PINK1;ARHGEF2;HERPUD1;CLU;NFE2L2;BAG5;ARMC10;DDX3X;BCL2L1	L5-6NP
223	GO_Molecular_Function_2023__Receptor Ligand Activity (GO:0048018)	0.205235	1.81077	0	0.245798	1	37/128	12.30%	FGF10;FGF20;BMP6;GDNF;NRG1;WNT2;FGF2;TAFA1;WNT7B;KNG1;APELA;CD86;GDF6;TAFA2;SEMA3D;KITLG;WNT3;TGFB3;NGF;WNT8A;WNT5A;SEMA3F;SEMA3C;HMGB2;BDNF;IL15;AMH;EDN1;VEGFA;PDGFB;VEGFC;IL16;WNT5B;EGF;ZP3;SEMA6A;INHA	L5-6NP
224	GO_Molecular_Function_2023__Pyridoxal Phosphate Binding (GO:0030170)	0.411896	1.80887	0.0078329	0.244166	1	9/17	16.87%	GLDC;ALB;SHMT2;PYGL;CBS;SHMT1;ACCS;PNPO;SRR	L5-6NP
225	GO_Biological_Process_2023__T Cell Receptor Signaling Pathway (GO:0050852)	0.234859	1.80799	0.00985222	0.236551	1	19/68	11.45%	TXK;FYB1;BTK;RNF31;BTN2A2;BTN3A1;BTN3A2;PTPN22;TEC;HHLA2;PRAM1;BCL10;IKBKG;NFKBIZ;BTNL2;ERMAP;BTN3A3;CD247;CSK	L5-6NP
226	GO_Molecular_Function_2023__Chemoattractant Activity (GO:0042056)	0.416158	1.80594	0.00907029	0.235287	1	7/15	10.36%	FGF10;GDNF;FGF2;HMGB2;VEGFA;PDGFB;VEGFC	L5-6NP
227	WikiPathway_2023_Human__CKAP4 Signaling Pathway Map WP5322	-0.247493	-1.80518	0.00453172	0.131207	1	34/83	25.04%	KDR;ITGB4;LEF1;CDH1;CCNB1;SOX2;ANGPTL2;EGFR;PTCH1;GLI2;ESR1;E2F1;VIM;CASP1;CCNE1;ITGA5;HSPA1A;MYCN;BMI1;PTGER3;PARD3;MIF;ABCG2;BAX;TCF7;CDKN1B;TGFBR1;TP53;CASP8;CHEK2;CKAP4;BRCA1;BCL2L11;DUSP6	L5-6NP
228	GO_Cellular_Component_2023__Vesicle (GO:0031982)	-0.200864	-1.79809	0.0028777	0.136025	1	57/183	20.30%	MYO1E;CYB561D2;CD9;ANXA1;F3;GSTP1;TSPAN4;ATP1A2;BMP5;WDR54;SLC39A12;LAMP3;EGFR;ALDH3B1;SLC28A2;PLCG2;UBB;CIB1;MSN;TUBB2A;PRELP;CD81;PROM1;EDIL3;RPS27A;E2F1;APOE;F5;EPS8;OGN;MYL6;GAD1;GAPDH;CBR1;HSPA1A;TUBB4B;MYO1B;RAB3A;SERPINE2;EFEMP2;RAB39B;CEND1;VAMP2;GNB2;ATP1A3;PPIA;EZR;CHMP4A;MYO1F;CST3;LZTS2;CTSF;STX10;CFL1;UBA52;CALM3;DGKQ	L5-6NP
229	GO_Biological_Process_2023__Notch Signaling Pathway (GO:0007219)	-0.348301	-1.79639	0.00520833	0.136636	1	10/30	9.05%	MAML3;NOTCH1;DLL3;NOTCH3;ASCL1;BMP2;HES1;NOTCH2;HEY1;NLE1	L5-6NP
230	WikiPathway_2023_Human__Type II Interferon Signaling WP619	0.356809	1.79261	0.00915332	0.237234	1	10/23	15.69%	NOS2;IRF9;CIITA;CYBB;PRKCD;OAS1;ICAM1;IFI6;SPI1;IRF1	L5-6NP
231	GO_Molecular_Function_2023__General Transcription Initiation Factor Binding (GO:0140296)	-0.347246	-1.79031	0.00483871	0.139988	1	18/27	37.91%	THAP7;ZFP36L2;DRAP1;ESR1;PSMC5;TP53;HSF1;AKR1B1;RUVBL2;GTF2F1;RUVBL1;TBP;TAF13;DR1;GTF2A2;TAF11;TAF12;TAF1B	L5-6NP
232	GO_Biological_Process_2023__Proton Transmembrane Transport (GO:1902600)	-0.323487	-1.78454	0.00998336	0.142515	1	26/35	46.71%	ATP6V1F;ATP1A2;ATP5PO;ATP6V0B;SLC46A1;NOX5;RNASEK;ATP1A3;ATP5MF;ATP6AP1;HVCN1;COX15;ATP6AP2;ATP5F1B;ATP1B1;ATP6V0E2;ATP6V0D1;ATP1A1;ATP6V0E1;ATP6V1D;DMAC2L;ATP6V1E1;ATP6V1B2;ATP6V1A;TMEM175;ATP6V1C1	L5-6NP
233	MSigDB_Hallmark_2020__Epithelial Mesenchymal Transition	-0.214127	-1.778	0.0030303	0.145687	1	42/136	14.90%	ITGA2;GREM1;FBLN1;SLIT2;PRRX1;COL5A3;MXRA5;ITGB5;MCM7;LOX;THBS2;NOTCH2;PMP22;HTRA1;LGALS1;IGFBP2;EDIL3;LAMA3;SDC4;LAMA1;PDGFRB;DCN;SPARC;ID2;VIM;SPP1;NT5E;ITGA5;GADD45A;BMP1;LOXL1;SNTB1;TIMP3;LAMA2;GPX7;COL16A1;SFRP4;SERPINE2;EFEMP2;RGS4;CRLF1;FBN2	L5-6NP
234	GO_Biological_Process_2023__Regulation Of Interleukin-6 Production (GO:0032675)	0.245315	1.75299	0.0078329	0.247303	1	18/59	11.55%	NOS2;TLR2;CD74;IL6R;TNFSF4;GBA1;PTPN6;LCP1;PTPN22;TMEM106A;C1QTNF3;NMBR;WNT5A;BCL10;RIGI;NCKAP1L;IL16;XBP1	L5-6NP
235	GO_Cellular_Component_2023__Adherens Junction (GO:0005912)	-0.211781	-1.75072	0.00295421	0.164382	1	41/128	21.03%	MYO1E;FRMD4B;SHROOM4;ANXA1;NOTCH1;PARD3B;CDH1;NDRG1;CEACAM1;PGM5;LDB3;LIN7B;MSN;SHROOM1;PDLIM2;CDH4;PDLIM7;BAIAP2L1;JUP;ESAM;NECTIN3;LLGL2;MPP3;SH3BP1;CDH7;SMAD7;PPP1CA;CCDC85B;PARD3;CDC42EP4;PDLIM1;EZR;CDH12;JCAD;RND1;SCRIB;LIMD1;LLGL1;CCDC85C;FAT2;CTNNA3	L5-6NP
236	GO_Biological_Process_2023__Negative Regulation Of Cell Death (GO:0060548)	-0.277988	-1.74974	0.00995025	0.164523	1	37/52	46.57%	KANK2;AMIGO2;CHMP2A;CCN5;MECOM;HTRA2;CCN3;CHMP6;MT3;CHMP4A;PSMC5;CDK5;TIGAR;CD200R1;CHMP1A;WFS1;VPS4A;CHMP3;EIF4G1;TRAF2;BNIP3;PARK7;PINK1;CHMP1B;CHGA;CHMP2B;VPS35;CHMP5;XPNPEP1;TXNDC12;BECN1;PEPD;DPP8;ATP13A2;SNCA;TM7SF3;CD200	L5-6NP
237	GO_Biological_Process_2023__Nuclear Transport (GO:0051169)	0.290316	1.73788	0.00802139	0.25229	1	36/37	66.90%	NUP43;RBM15B;NUP62;RAE1;NUP37;NDC1;GLE1;NUP35;NUP188;NUP85;NUP205;RANGAP1;NUP214;NUP107;NUP58;NUP160;NUP210;TPR;NUP54;NUP98;NUP153;NUP93;RSRC1;NUP133;AHCTF1;RANBP2;XPO1;POM121;NUP88;ANP32A;NPM1;NUP155;SEH1L;SEC13;NUP50;NUP42	L5-6NP
238	MSigDB_Hallmark_2020__Xenobiotic Metabolism	-0.209956	-1.73434	0	0.174535	1	76/142	38.08%	CYP2J2;GCNT2;NDRG2;TTPA;FBLN1;GSTT2;DDAH2;PDK4;IRF8;RBP4;CYP26A1;PTGDS;CAT;HES6;ECH1;ESR1;HSD11B1;APOE;JUP;ID2;CYP27A1;DDT;IGF1;GAD1;CBR1;PLG;EPHX1;GNMT;MT2A;DHPS;TKFC;TMEM97;KYNU;ITIH4;CA2;ACP2;F10;ACOX2;BLVRB;LONP1;NQO1;GABARAPL1;DCXR;CDO1;MPP2;PGRMC1;SLC35B1;ARG1;AHCY;DHRS7;GCH1;ASL;ARG2;PINK1;KARS1;RETSAT;GSS;BCAR1;CNDP2;TGFB2;PGD;POR;PMM1;CD36;ARPP19;SSR3;GSTO1;CYP2E1;ALDH2;IDH1;COMT;GCLC;BP…	L5-6NP
239	GO_Biological_Process_2023__Protein Targeting (GO:0006605)	-0.218497	-1.72424	0.00877193	0.178784	1	66/116	42.84%	TIMM10;TOMM5;TIMM8B;TOMM22;TIMM13;SRP14;TOMM7;PEX16;TSPO;ZDHHC24;ZFAND2A;PARD3;SPCS1;TIMM17B;RPL11;FIS1;PEX19;ZDHHC4;BCAP31;ZDHHC1;TOMM20;TOMM34;NACA;MICALL1;AP4M1;YIF1B;TIMM17A;TOMM40;SRPRA;NACAD;TIMM44;DNAJC19;MYO1C;CDC37;SRPRB;SPCS3;ZDHHC22;KATNB1;GOLGA7;ZDHHC14;ZFAND2B;FUT10;ZDHHC9;GIPC1;SEC61A1;ZDHHC7;RABGEF1;TAOK2;ICMT;EDEM1;MFN2;AP3D1;LAMP2;SPCS2;MAN1A1;ZDHHC18;SDCBP;FBXO7;TIMM9;PEX6;CACNG…	L5-6NP
240	GO_Biological_Process_2023__Organic Anion Transport (GO:0015711)	-0.25641	-1.71792	0.00966184	0.185245	1	33/65	30.58%	SLCO1A2;CALHM1;SLCO1C1;SLC22A6;CPTP;SLC52A1;SLC35A2;SLC22A24;SLC22A25;SLC39A8;CFTR;SLC35B2;SLC4A2;CYB5RL;SLC25A4;SLCO4A1;SLC26A5;ABCG2;SLC25A19;SLC35B3;SLC52A2;SLC22A10;MGST1;SLC35B1;SLCO5A1;SLC4A3;SLC2A1;LRRC8A;SLC35A1;SLC2A6;LRRC8D;MFSD10;SLC2A3	L5-6NP
241	WikiPathway_2023_Human__PI3K Akt Signaling Pathway WP4172	-0.182089	-1.71772	0.00284091	0.184658	1	73/236	20.99%	DDIT4;SYK;KDR;ITGA2;IL4R;FGFR3;LPAR1;FGFR2;GNG3;ITGB4;TLR4;PDGFD;CSF1R;COL4A5;TGFA;RELN;COL9A2;CREB3L3;FGF7;EGFR;FGFR4;ITGA1;ITGB5;GNG4;THBS2;THEM4;MET;LAMA3;GNG2;MLST8;LAMA1;PDGFRB;COL9A3;CCNE2;SPP1;HGF;IGF1;RPS6;CSF3R;CCNE1;ITGA5;ITGA7;CREB3L1;ANGPT1;CREB3;LAMA2;HRAS;CHRM1;FGF13;ITGB8;ITGA11;EFNA3;GNG12;GNB2;VEGFB;IL7;ITGA10;FGF22;COL4A4;COL6A6;CREB5;CDKN1B;THBS3;ANGPT2;TP53;EFNA2;EIF4EBP1;SGK1…	L5-6NP
242	MSigDB_Hallmark_2020__Inflammatory Response	0.197238	1.71617	0.00806452	0.263177	1	25/105	9.48%	EMP3;FPR1;ADORA2B;SELL;C5AR1;TLR2;KCNJ2;PIK3R5;SLC7A2;AXL;PTAFR;OSMR;CD82;CD40;CHST2;CYBB;MSR1;TACR1;GPR183;RNF144B;SLC4A4;ICAM1;IL15;EDN1;SGMS2	L5-6NP
243	MSigDB_Hallmark_2020__Adipogenesis	-0.190093	-1.70346	0.00713267	0.195245	1	46/174	16.17%	JAGN1;ENPP2;COX8A;ITIH5;MRAP;C3;GPX3;NDUFB7;ATP5PO;NDUFS3;COX6A1;ANGPTL4;SLC25A1;CHCHD10;CPT2;CYC1;CAT;UQCR10;ETFB;SNCG;ECH1;UBC;UQCRQ;APOE;GPX4;DDT;IDH3G;ITGA7;PIM3;UCK1;GADD45A;ANGPT1;ACADS;GRPEL1;LPL;SOD1;UQCR11;COX7B;MDH2;ALDOA;PTGER3;SLC5A6;PLIN2;ARL4A;VEGFB;FZD4	L5-6NP
244	KEGG_2021_Human__PI3K-Akt signaling pathway	-0.179273	-1.70328	0.00282885	0.194638	1	76/248	20.99%	DDIT4;SYK;KDR;ITGA2;IL4R;FGFR3;LPAR1;FGFR2;GNG3;ITGB4;TLR4;PDGFD;CSF1R;COL4A5;TGFA;ERBB4;RELN;COL9A2;CREB3L3;ERBB3;FGF7;EGFR;FGFR4;ITGA1;ITGB5;GNG4;THBS2;THEM4;MET;LAMA3;GNG2;MLST8;LAMA1;PDGFRB;COL9A3;MTCP1;CCNE2;SPP1;HGF;IGF1;RPS6;CSF3R;CCNE1;ITGA5;ITGA7;CREB3L1;ANGPT1;CREB3;LAMA2;HRAS;CHRM1;ITGB8;ITGA11;EFNA3;GNG12;GNB2;VEGFB;IL7;ITGA10;FGF22;COL4A4;COL6A6;CREB5;CDKN1B;THBS3;ANGPT2;TP53;EFNA2;E…	L5-6NP
245	GO_Biological_Process_2023__protein-RNA Complex Assembly (GO:0022618)	-0.201546	-1.70103	0.00435414	0.196618	1	93/138	51.08%	NOP53;RPS28;RPS15;NLE1;SNRPE;XAB2;MRPS7;LSM4;TSSC4;RRS1;SNRPG;RPL10;RPS14;RPLP0;SNRPD2;EIF6;RPS27;PUF60;RPS5;EIF3G;PPAN;RPL11;RPL23A;NUDT21;SHQ1;RPL38;RPS19;RPL5;GEMIN4;RAMACL;EIF3C;SNRPB;HSP90AB1;GEMIN7;RPL6;RRP7A;DDX20;RPSA;GEMIN6;SART1;HSP90AA1;SNRPD1;SF3A2;HEXIM1;EIF3I;MRPS11;EIF5;ERAL1;EIF3D;SRSF6;MRPL20;EIF3K;EIF2S2;LUC7L2;CELF3;DDX23;COIL;DDX39B;PRPF19;EIF3M;TXNL4A;EIF3F;TNIP1;EIF3H;SRSF9;…	L5-6NP
246	WikiPathway_2023_Human__Hippo Merlin Signaling Dysregulation WP4541	-0.228185	-1.69061	0.00725689	0.203344	1	29/97	17.08%	KDR;ITGA2;FGFR3;FGFR2;ITGB4;CDH19;CSF1R;CDH1;CDH20;PPP1R14A;EGFR;ITGAM;FGFR4;ITGA1;LATS2;ITGB5;CDH4;MET;PDGFRB;ITGA5;ITGA7;CDH7;HRAS;PPP1CA;ITGB8;ITGA11;ITGA10;CDH12;MST1	L5-6NP
247	MSigDB_Hallmark_2020__p53 Pathway	-0.192507	-1.68131	0.00875912	0.206767	1	75/154	35.96%	DDIT4;CDKN2A;ITGB4;NOTCH1;ATF3;FOS;NDRG1;TGFA;TRIAP1;BMP2;CD81;RAP2B;PHLDA3;H2AJ;LDHB;BTG1;CASP1;RPS12;SLC7A11;ADA;GADD45A;EPHX1;RPL18;PLK3;CTSD;HRAS;RACK1;RPL36;FGF13;TRAF4;HINT1;PERP;RRP8;BAX;PPP1R15A;GM2A;TGFB1;PROCR;TP53;CTSF;PIDD1;PRKAB1;PCNA;DGKA;HBEGF;DCXR;IER5;BTG2;TRAFD1;WRAP73;GLS2;ISCU;MKNK2;HEXIM1;EPS8L2;CCNG1;IRAK1;RXRA;VWA5A;EI24;PDGFA;RETSAT;AK1;TPRKB;PLK2;MXD4;CDK5R1;RNF19B;SEC61A…	L5-6NP
248	KEGG_2021_Human__Human papillomavirus infection	-0.174355	-1.67169	0	0.213917	1	76/248	21.81%	ITGA2;ITGB4;MAML3;ATP6V1F;NOTCH1;COL4A5;NOTCH3;HES4;RELN;COL9A2;CREB3L3;EGFR;FADD;MAML2;HES1;ITGA1;ITGB5;THBS2;NOTCH2;WNT4;HES6;LAMA3;HEY1;ATP6V0B;LAMA1;HLA-C;E2F1;PDGFRB;COL9A3;IRF3;CCNA1;CCNE2;SPP1;PARD6A;CCNE1;ITGA5;ITGA7;CREB3L1;TRADD;LLGL2;FOXO1;HLA-B;CREB3;LAMA2;HRAS;ATP6V1G2;ITGB8;ITGA11;AXIN2;DVL1;PARD3;PXN;PTGS2;TUBG1;FZD4;ITGA10;BAX;TCF7;COL4A4;TICAM1;COL6A6;CREB5;CDKN1B;ISG15;SCRIB;THB…	L5-6NP
249	GO_Biological_Process_2023__Positive Regulation Of Intracellular Signal Transduction (GO:1902533)	-0.155589	-1.64632	0.00269179	0.235852	1	122/395	23.10%	MUSK;KDR;BMP7;CX3CR1;HTR2B;GCNT2;FGFR3;LPAR1;FGFR2;UNC5B;LRP2;TRIM6;GPRC5B;CASP10;PTPRC;P2RX5;TLR4;PDGFD;CARD16;IGFBP6;LYN;SOX2;RELN;BMP2;ERBB3;GPR37L1;CAV1;EGFR;TRIM56;CAV2;FADD;NTRK3;PLCG2;LAMTOR1;FRMD6;S100B;LRRC19;MYORG;ROR2;PRKD1;LGALS1;RPS15;CD81;HLA-DRB1;P2RY12;ADRA1D;MLST8;AKAP13;HAX1;PDGFRB;JMJD8;DCN;SEMA5A;MAZ;AGT;IL18;GFRAL;CASP1;DDR1;HGF;IGF1;CD4;LAMTOR2;GAPDH;SLC35B2;ADAM8;BOK;TRADD;…	L5-6NP
250	GO_Biological_Process_2023__Supramolecular Fiber Organization (GO:0097435)	-0.176413	-1.6307	0.0057971	0.248178	1	98/204	38.56%	ADAMTS14;MYO1E;INPPL1;TPPP3;SHROOM4;GREM1;ARHGAP25;ELMO1;CAPN3;SERPINB8;CORO1B;PGM5;MAP7D3;EPPK1;RAC3;TRDN;CGNL1;COL5A3;CIB1;LOX;KRT10;MYH11;VIM;KIF2C;ERMN;SH3BP1;RHOG;BMP1;MYO1B;NCKAP5;CYP1B1;PLK3;LOXL1;EMP2;B4GALT7;BFSP1;STMND1;MARCKSL1;FGF13;EFEMP2;TLL2;ALDOA;MAP10;KIF24;FKBP1A;BAX;CORO1A;B2M;MYO1F;LMOD1;CST3;RHOF;RND1;TGFBR1;NEFL;STMN1;ATP7A;HSP90AB1;TBCB;TAGLN3;COL5A2;FAT1;ZBED3;MARCKS;MYO15…	L5-6NP
251	KEGG_2021_Human__Ribosome	-0.465956	-3.37317	0	0	0	105/118	45.63%	MRPL20;MRPL30;RPL10A;MRPS10;RPLP1;RPS19;RPS21;RPL6;MRPL27;RPL38;RPS11;RPL36AL;MRPS12;RPS9;RPS15;UBA52;RPS3A;RPS10;MRPS18C;MRPL11;RPS3;MRPL14;RPS27A;RPL26;RPS2;FAU;RPS12;RPL36;RPS13;RPS25;RPS18;MRPL33;MRPS18A;MRPS6;RPL21;MRPS5;MRPL34;RPL19;RPS4Y1;RPL13;RPL14;RPS28;RPS7;RPLP2;MRPL21;RPL29;MRPS14;RPS5;MRPL16;RPL32;RPL12;RPS6;RPL39;RPSA;RPL8;RPS23;RPS20;RPL18A;RPL10;RPL27;MRPS16;RPS16;RPL24;RPL7A;RPS…	L5ET
252	GO_Biological_Process_2023__Cytoplasmic Translation (GO:0002181)	-0.488465	-3.27228	0	0	0	78/86	45.41%	RPL10A;RPLP1;RPS19;RPS21;RPL6;RPL38;RPS11;RPL36AL;DRG2;MRPS12;RPS9;RPS15;UBA52;RPS3A;RPS10;RPS3;RPS27A;RPL26;RPS2;FAU;RPL36;RPS13;RPS25;RPS18;RPL21;RPL19;RPL13;RPL14;RPS28;RPS7;RPLP2;RPL29;RPS5;RPL32;RPL12;RPS6;ETF1;RPL39;RPSA;RPL8;RPS23;RPS20;RPL18A;EIF3M;RPL10;RPL27;RPS16;RPL24;RPL7A;RPS14;RPS4X;RPL35;RPS15A;EIF3I;RPS26;RPLP0;RPL11;RPS27;RPL28;RPL13A;RPS8;RPL3;RACK1;RPL23A;RPL5;RPL27A;RPL18;RPL…	L5ET
253	WikiPathway_2023_Human__Cytoplasmic Ribosomal Proteins WP477	-0.484737	-3.20678	0	0	0	65/83	35.91%	RPL10A;RPS6KA2;RPLP1;RPS19;RPS21;RPL6;RPL38;RPS11;RPS9;RPS15;UBA52;RPS3A;RPS10;RPS3;RPS27A;RPL26;RPS2;FAU;RPS12;RPL36;RPS13;RPS25;RPS18;RPL21;RPL19;RPS4Y1;RPL13;RPL14;RPS28;RPS7;RPLP2;RPL29;RPS5;RPL32;RPL12;RPS6;RPL39;RPSA;RPL8;RPS23;RPS20;RPL18A;RPL10;RPL27;RPS16;RPL24;RPL7A;RPS14;RPL23;RPS4X;RPL35;RPS15A;RPS26;RPLP0;RPL11;RPS27;RPL28;RPL13A;RPS8;RPL3;RPL23A;RPL5;RPL27A;RPL18;RPL9	L5ET
254	GO_Cellular_Component_2023__Small Ribosomal Subunit (GO:0015935)	-0.601776	-3.1726	0	0	0	34/37	33.97%	RPS19;RPS21;RPS11;MRPS12;RPS9;RPS15;UBA52;RPS3A;RPS10;RPS3;RPS27A;RPS2;FAU;RPS13;RPS25;RPS18;MRPS6;RPS4Y1;RPS28;RPS7;RPS5;EIF2S1;RPS6;RPSA;RPS23;RPS20;RPS16;RPS14;RPS4X;RPS15A;RPS26;RPS27;RPS8;RACK1	L5ET
255	GO_Cellular_Component_2023__Cytosolic Small Ribosomal Subunit (GO:0022627)	-0.599995	-3.13702	0	0	0	33/36	33.97%	RPS19;RPS21;RPS11;MRPS12;RPS9;RPS15;UBA52;RPS3A;RPS10;RPS3;RPS27A;RPS2;FAU;RPS13;RPS25;RPS18;RPS4Y1;RPS28;RPS7;RPS5;EIF2S1;RPS6;RPSA;RPS23;RPS20;RPS16;RPS14;RPS4X;RPS15A;RPS26;RPS27;RPS8;RACK1	L5ET
256	GO_Biological_Process_2023__Peptide Biosynthetic Process (GO:0043043)	-0.420158	-3.09728	0	0	0	105/130	43.95%	RPL10A;RPLP1;MRPL51;RPS19;RPS21;MRPL55;RPL6;MRPL27;RPL38;RPS11;RPL36AL;MRPS12;RPS9;RPS15;RPS3A;RPS10;MRPS18C;MRPL11;RPS3;EEF1A2;MRPL14;RPS27A;RPL26;RPS2;FAU;RPL36;RPS13;RPS25;RPS18;MRPS18A;MRPS6;RPL21;MRPS5;MRPL34;RPL19;RPS4Y1;MRPL41;MRPS18B;RPL13;RPL14;RPS28;RPS7;RPLP2;PCSK1;RPL29;MRPS14;RPS5;MRPS33;YARS2;RPL32;RPL12;RPS6;RPL39;RPSA;RPL8;COPS5;RPS23;RPS20;RPL18A;RPL10;RPL27;MRPS16;RPS16;RPL24;RP…	L5ET
257	GO_Biological_Process_2023__Macromolecule Biosynthetic Process (GO:0009059)	-0.407583	-3.08502	0	0	0	119/152	43.95%	EEF1B2;EIF5A;RPL10A;RPLP1;MRPL51;RPS19;RPS21;MRPL55;B4GAT1;RPL6;MRPL27;RPL38;EIF5A2;RPS11;RPL36AL;MRPS12;RPS9;RPS15;POLD2;RPS3A;RPS10;MRPS18C;MRPL11;RPS3;EEF1A2;MRPL14;RPS27A;RPL26;ABCF1;RPS2;FAU;RPL36;RPS13;RPS25;RPS18;MRPS18A;MRPS6;INHA;RPL21;MRPS5;TUFM;MRPL34;RPL19;RPS4Y1;MRPL41;MRPS18B;POLL;RPL13;RPL14;RPS28;RPS7;EEF2;RPLP2;RPL29;MRPS14;GTPBP1;RPS5;MRPS33;YARS2;RPL32;RPL12;RPS6;RPL39;RPSA;RPL…	L5ET
258	WikiPathway_2023_Human__Electron Transport Chain OXPHOS System In Mitochondria WP111	-0.455249	-3.0163	0	0	0	67/85	38.23%	COX8A;COX7C;NDUFS3;COX7A1;NDUFA11;COX15;NDUFB4;NDUFA13;NDUFA2;ATP5F1D;SDHD;NDUFB7;ATP5IF1;ATP5PF;NDUFS5;COX17;NDUFAB1;ATP5F1E;NDUFA4;COX5A;ATP5MF;NDUFA6;ATP5MC3;COX6A1;SLC25A5;NDUFC2;ATP5ME;NDUFC1;UQCR10;COX6B1;NDUFS6;ATP5MC1;ATP5F1B;NDUFV2;NDUFB8;COX7B;COX5B;UQCRFS1;NDUFA1;SCO1;NDUFS7;NDUFB9;SDHA;COX4I1;ATP5MG;NDUFA9;UQCRQ;NDUFS8;NDUFB1;NDUFB10;SLC25A4;UQCR11;NDUFA3;COX6C;NDUFB3;ATP5PB;SDHC;UQCR…	L5ET
259	KEGG_2021_Human__Oxidative phosphorylation	-0.42838	-2.94198	0	0	0	76/102	38.23%	NDUFB11;COX8A;ATP6V1D;COX7C;NDUFS3;COX7A1;NDUFA11;COX15;NDUFB4;NDUFA13;NDUFA2;ATP6AP1;ATP5F1D;SDHD;NDUFB7;ATP6V1G1;ATP5PF;NDUFS5;ATP6V1E2;COX17;NDUFAB1;ATP6V1F;ATP5F1E;NDUFA4;COX5A;ATP5MF;NDUFA6;ATP6V0B;CYC1;ATP6V0E2;ATP5MC3;COX6A1;NDUFC2;ATP5ME;NDUFC1;UQCR10;COX6B1;NDUFS6;ATP6V1G2;ATP5MC1;ATP5F1B;NDUFV2;NDUFB8;COX7B;COX5B;UQCRFS1;NDUFA1;NDUFS7;NDUFB9;SDHA;COX4I1;ATP5MG;NDUFA9;PPA1;UQCRQ;NDUFS8;N…	L5ET
260	GO_Biological_Process_2023__Aerobic Electron Transport Chain (GO:0019646)	-0.459259	-2.78537	0	9.66034e-05	0.001	47/59	38.23%	COX8A;COX7C;NDUFS3;COX15;NDUFB4;NDUFA2;SDHD;NDUFB7;NDUFS5;NDUFAB1;NDUFA4;COX5A;NDUFA6;CYC1;COX6A1;NDUFC2;NDUFC1;UQCR10;COX6B1;NDUFS6;NDUFV2;NDUFB8;COX7B;COX5B;UQCRFS1;NDUFA1;NDUFS7;NDUFB9;SDHA;COX4I1;NDUFA9;UQCRQ;NDUFS8;NDUFB1;NDUFB10;NDUFAF1;CYCS;UQCR11;NDUFA3;COX6C;NDUFB3;SDHC;UQCRH;COX7A2;NDUFB5;UQCRB;NDUFA8	L5ET
261	GO_Biological_Process_2023__Translation (GO:0006412)	-0.345585	-2.76819	0	8.78212e-05	0.001	127/197	37.59%	MRPL20;MRPL30;EEF1B2;EIF5A;RPL10A;MRPS10;RPLP1;MRPL51;RPS19;RPS21;MRPL55;RPL6;MRPL27;RPL38;MRPL46;EIF5A2;MRPS34;RPS11;RPL36AL;DRG2;MRPS12;RPS9;RPS15;UBA52;MRPS22;RPS3A;RPS10;MRPS18C;MRPL11;RPS3;MRPL44;EEF1A2;MRPL14;RPS27A;RPL26;ABCF1;RPS2;FAU;GADD45GIP1;RPL36;RPS13;RPS25;RPS18;CHCHD1;MRPL33;MRPS18A;MRPS6;RPL21;MRPS5;TUFM;MRPL34;RPL19;RPS4Y1;MRPL41;MRPS18B;RPL13;RPL14;RPS28;RPS7;EEF2;RPLP2;MRPL21;…	L5ET
262	GO_Biological_Process_2023__Cellular Respiration (GO:0045333)	-0.417226	-2.76191	0	8.05028e-05	0.001	59/80	38.23%	NDUFB11;COX8A;COX7C;NDUFS3;ETFB;NDUFA11;SLC25A13;COX15;NDUFB4;NDUFA13;NDUFA2;BLOC1S1;NDUFB7;NDUFS5;NDUFAB1;NDUFA4;COX5A;NDUFA6;CYC1;COX6A1;NDUFC2;NDUFC1;UQCR10;COX6B1;NDUFS6;NDUFV2;NDUFB8;COX7B;COX5B;UQCRFS1;NDUFA1;NDUFS7;NDUFB9;SDHA;COX4I1;SDHAF4;NDUFA9;UQCRQ;NDUFS8;NDUFB1;NDUFB10;MTFR1;CYCS;UQCR11;NR4A3;SIRT3;NDUFA3;COX6C;NDUFB3;SDHC;MDH2;UQCRH;CHCHD5;COX7A2;MTLN;NDUFA12;NDUFB5;UQCRB;NDUFA8	L5ET
263	GO_Cellular_Component_2023__Large Ribosomal Subunit (GO:0015934)	-0.487826	-2.74189	0	6.90024e-05	0.001	41/45	45.41%	RPL10A;RPLP1;RPL6;RPL38;RPL36AL;UBA52;RPL26;RPL36;RPL21;RPL19;RPL13;RPL14;RPLP2;RPL29;RPL32;RPL12;RPL39;RPL8;RPL18A;RPL27;RPL24;RPL7A;RPL35;RPLP0;RPL11;RPL28;RPL13A;RPL3;RPL23A;RPL5;RPL27A;RPL18;RPL9;RPL34;RPL7L1;RPL31;RPL15;RPL22;RPL41;RPL35A;RPL30	L5ET
264	GO_Cellular_Component_2023__Cytosolic Large Ribosomal Subunit (GO:0022625)	-0.487826	-2.74189	0	6.90024e-05	0.001	41/45	45.41%	RPL10A;RPLP1;RPL6;RPL38;RPL36AL;UBA52;RPL26;RPL36;RPL21;RPL19;RPL13;RPL14;RPLP2;RPL29;RPL32;RPL12;RPL39;RPL8;RPL18A;RPL27;RPL24;RPL7A;RPL35;RPLP0;RPL11;RPL28;RPL13A;RPL3;RPL23A;RPL5;RPL27A;RPL18;RPL9;RPL34;RPL7L1;RPL31;RPL15;RPL22;RPL41;RPL35A;RPL30	L5ET
265	GO_Biological_Process_2023__Mitochondrial ATP Synthesis Coupled Electron Transport (GO:0042775)	-0.442478	-2.72703	0	6.44022e-05	0.001	48/62	38.23%	COX8A;COX7C;NDUFS3;COX15;NDUFB4;NDUFA2;SDHD;NDUFB7;NDUFS5;NDUFAB1;NDUFA4;COX5A;NDUFA6;CYC1;COX6A1;NDUFC2;NDUFC1;UQCR10;COX6B1;NDUFS6;NDUFV2;NDUFB8;COX7B;COX5B;UQCRFS1;NDUFA1;NDUFS7;NDUFB9;SDHA;COX4I1;NDUFA9;UQCRQ;NDUFS8;NDUFB1;NDUFB10;NDUFAF1;CYCS;UQCR11;NDUFA3;COX6C;NDUFB3;SDHC;UQCRH;COX7A2;NDUFA12;NDUFB5;UQCRB;NDUFA8	L5ET
266	GO_Biological_Process_2023__Proton Motive Force-Driven ATP Synthesis (GO:0015986)	-0.456827	-2.71299	0	6.03771e-05	0.001	45/57	38.23%	NDUFB11;NDUFS3;NDUFA11;NDUFB4;NDUFA13;NDUFA2;ATP5F1D;SDHD;NDUFB7;ATP5PF;NDUFS5;NDUFAB1;ATP5F1E;ATP5MF;NDUFA6;ATP5MC3;NDUFC2;ATP5ME;NDUFC1;NDUFS6;ATP5MC1;ATP5F1B;NDUFV2;NDUFB8;NDUFA1;NDUFS7;NDUFB9;SDHA;ATP5MG;NDUFA9;NDUFS8;NDUFB1;NDUFB10;ATP5MK;ATP5MJ;NDUFA3;NDUFB3;ATP5PB;SDHC;ATP5F1C;NDUFA12;ATP5PD;NDUFB5;ATP5PO;NDUFA8	L5ET
267	GO_Biological_Process_2023__Proton Motive Force-Driven Mitochondrial ATP Synthesis (GO:0042776)	-0.465933	-2.6693	0	0.000113651	0.001	41/51	38.23%	NDUFB11;NDUFS3;NDUFA11;NDUFB4;NDUFA13;NDUFA2;ATP5F1D;SDHD;NDUFB7;ATP5PF;NDUFS5;NDUFAB1;ATP5F1E;ATP5MF;NDUFA6;NDUFC2;ATP5ME;NDUFC1;NDUFS6;ATP5F1B;NDUFV2;NDUFB8;NDUFA1;NDUFS7;NDUFB9;SDHA;ATP5MG;NDUFA9;NDUFS8;NDUFB1;NDUFB10;NDUFA3;NDUFB3;ATP5PB;SDHC;ATP5F1C;NDUFA12;ATP5PD;NDUFB5;ATP5PO;NDUFA8	L5ET
268	GO_Cellular_Component_2023__Mitochondrial Inner Membrane (GO:0005743)	-0.311825	-2.62014	0	0.000107337	0.001	171/285	37.51%	MRPL20;MRPL30;NDUFB11;NOA1;COX8A;COX7C;NDUFS3;MRPS10;MRPL51;ENDOG;MRPL55;NDUFA11;MRPL27;UQCC2;SLC25A11;MRPL46;MRPS34;MRPS12;NDUFAF4;SLC25A13;DMAC1;SMDT1;COX15;COX18;NDUFB4;MRPS22;NDUFA13;NDUFA2;MRPS18C;MRPL11;RPS3;MRPL44;MRPL14;RDH13;HIGD1A;TOMM40;TIMM22;ATP5F1D;MAIP1;GADD45GIP1;TMEM126B;GPD2;SDHD;NDUFB7;EFHD1;ATP5PF;MRS2;NDUFS5;GHITM;MCUB;NME4;TIMM29;COQ7;CHCHD1;MRPL33;LDHB;MRPS18A;NDUFAB1;ADCK1…	L5ET
269	KEGG_2021_Human__Parkinson disease	-0.328646	-2.61928	0	0.000101688	0.001	119/193	37.51%	GPR37;NDUFB11;SNCAIP;COX8A;COX7C;NDUFS3;UBB;TUBA1C;HSPA5;PSMC1;COX7A1;NDUFA11;PSMA7;CALM2;PSMA4;UBA52;NDUFB4;UBE2J1;NDUFA13;TUBB4A;NDUFA2;PSMC4;ITPR2;PSMD2;ATF4;RPS27A;ATP5F1D;PSMC5;SDHD;NDUFB7;CALM3;ATP5PF;NDUFS5;TUBA4A;PLCG1;TUBB4B;PSMB6;PSMB3;NDUFAB1;PPIF;ATP5F1E;PSMB4;CAMK2D;NDUFA4;COX5A;GNAI2;NDUFA6;CYC1;UBC;ATP5MC3;COX6A1;UBE2L3;SLC25A5;NDUFC2;TUBB;NDUFC1;GNAL;UQCR10;PRKACA;COX6B1;NDUFS6;EI…	L5ET
270	GO_Cellular_Component_2023__Ribosome (GO:0005840)	-0.430497	-2.55677	0	0.00028981	0.005	46/55	45.41%	RPL10A;RPS19;RPS21;RPL6;RPL38;RPS11;RPL36AL;MRPS12;RPS9;RPS10;RPS3;RPL36;RPS13;RPS25;RPS18;RPL19;RPS28;RPS7;RPS5;RPL32;RPL39;RPL8;RPS23;RPL18A;RPL27;RPL24;RPL7A;RRBP1;RPS4X;EIF2AK2;RPS26;RPL11;BTF3;RPS27;NCK1;RPL13A;MRPS7;RPL18;RPL9;GCN1;SERP1;MRPL13;RPL31;RPL15;RPL41;RPL30	L5ET
271	GO_Biological_Process_2023__Oxidative Phosphorylation (GO:0006119)	-0.427882	-2.55379	0	0.00027601	0.005	44/58	38.23%	NDUFB11;NDUFS3;NDUFA11;NDUFB4;NDUFA13;NDUFA2;ATP5F1D;SDHD;NDUFB7;ATP5PF;NDUFS5;NDUFAB1;ATP5F1E;ATP5MF;NDUFA6;NDUFC2;ATP5ME;NDUFC1;NDUFS6;ATP5F1B;NDUFV2;NDUFB8;NDUFA1;NDUFS7;NDUFB9;SDHA;ATP5MG;NDUFA9;CHCHD10;NDUFS8;NDUFB1;NDUFB10;NDUFA3;NDUFB3;ATP5PB;SDHC;UQCRH;ATP5F1C;NDUFA12;ATP5PD;NDUFB5;ATP5PO;UQCRB;NDUFA8	L5ET
272	GO_Molecular_Function_2023__Oxidoreduction-Driven Active Transmembrane Transporter Activity (GO:0015453)	-0.435598	-2.50481	0	0.00070257	0.015	37/48	38.23%	COX8A;COX7C;NDUFS3;COX7A1;NDUFB4;NDUFA2;NDUFB7;NDUFS5;CYB561A3;NDUFA4;COX5A;NDUFA6;NDUFC2;CYB5A;NDUFC1;UQCR10;COX6B1;NDUFS6;NDUFV2;NDUFB8;COX7B;COX5B;NDUFA1;NDUFS7;NDUFB9;COX4I1;NDUFA9;NDUFS8;NDUFB1;NDUFB10;NDUFA3;NDUFB3;UQCRH;NDUFA12;NDUFB5;UQCRB;NDUFA8	L5ET
273	GO_Cellular_Component_2023__Organelle Inner Membrane (GO:0019866)	-0.29324	-2.48202	0	0.000924032	0.02	175/301	37.51%	MRPL20;MRPL30;NDUFB11;COX8A;COX7C;NDUFS3;MRPS10;MRPL51;ENDOG;MRPL55;NDUFA11;MRPL27;UQCC2;SLC25A11;MRPL46;MRPS34;MRPS12;NDUFAF4;SLC25A13;DMAC1;SMDT1;COX15;COX18;NDUFB4;MRPS22;NDUFA13;NDUFA2;MRPS18C;MRPL11;RPS3;MRPL44;MRPL14;RDH13;HIGD1A;TOMM40;TIMM22;ATP5F1D;MAIP1;GADD45GIP1;TMEM126B;GPD2;SDHD;NDUFB7;EFHD1;ATP5PF;MRS2;NDUFS5;GHITM;MCUB;NME4;TIMM29;COQ7;CHCHD1;MRPL33;LDHB;MRPS18A;NDUFAB1;ADCK1;ATP5…	L5ET
274	GO_Cellular_Component_2023__Motile Cilium (GO:0031514)	0.312457	2.47375	0	0.107602	0.087	27/51	22.26%	CFAP300;SPEF1;CFAP73;ROPN1L;CATSPERG;IQUB;AK8;CFAP91;WDR19;CFAP161;OFD1;DNAH2;ARL13B;IQCG;DNAH5;DNAH9;IFT74;MKKS;INTU;CFAP221;ODAD4;DNAI4;IFT81;PKD1;GAS8;DAAM1;DYNC2H1	L5ET
275	WikiPathway_2023_Human__Oxidative Phosphorylation WP623	-0.428298	-2.45104	0	0.00136855	0.032	31/49	27.16%	NDUFS3;NDUFA11;NDUFB4;NDUFA2;ATP6AP1;ATP5F1D;NDUFB7;ATP5PF;NDUFS5;ATP6AP2;NDUFAB1;ATP5F1E;NDUFA4;ATP5MF;NDUFA6;ATP5MC3;NDUFC2;ATP5ME;NDUFC1;NDUFS6;ATP5MC1;ATP5F1B;NDUFV2;NDUFB8;NDUFS7;NDUFB9;ATP5MG;NDUFA9;NDUFS8;NDUFB1;NDUFB10	L5ET
276	KEGG_2021_Human__Coronavirus disease	-0.321705	-2.39449	0	0.00301403	0.066	80/132	36.47%	RPL10A;RPLP1;RPS19;RPS21;RPL6;RPL38;IL6R;RPS11;RPL36AL;RPS9;RPS15;UBA52;RPS3A;RPS10;RPS3;RPS27A;RPL26;RPS2;FAU;RPS12;RPL36;C5;RPS13;RPS25;RPS18;PLCG1;IL6ST;RPL21;RPL19;RPS4Y1;RPL13;RPL14;IKBKG;RPS28;RPS7;RPLP2;PIK3CD;RPL29;C1S;RPS5;RPL32;RPL12;RPS6;RPL39;MAPK9;RPSA;RPL8;MAPK3;RPS23;RPS20;RPL18A;RPL10;RPL27;RPS16;RPL24;RPL7A;RPS14;RPL23;RPS4X;EIF2AK2;RPL35;RPS15A;STAT3;RPS26;RPLP0;RPL11;RPS27;PIK3…	L5ET
277	KEGG_2021_Human__Diabetic cardiomyopathy	-0.316508	-2.36937	0	0.00393844	0.09	86/141	38.24%	NDUFB11;COX8A;COX7C;NDUFS3;COX7A1;NDUFA11;CD36;RAC1;PLN;NDUFB4;NDUFA13;NDUFA2;GAPDH;ATP5F1D;SDHD;NDUFB7;ATP5PF;NDUFS5;CTSD;GSR;NDUFAB1;PPIF;ATP5F1E;PTPA;CAMK2D;NDUFA4;COX5A;NDUFA6;CYC1;ATP5MC3;COX6A1;SLC25A5;NDUFC2;PIK3CD;NDUFC1;UQCR10;COX6B1;NDUFS6;ATP5MC1;TGFB2;ATP5F1B;NDUFV2;NDUFB8;COX7B;COX5B;UQCRFS1;NDUFA1;NDUFS7;PPP1CC;NDUFB9;SDHA;AKT1;MAPK9;COX4I1;NDUFA9;UQCRQ;NDUFS8;NDUFB1;VDAC1;PDK2;NDUF…	L5ET
278	GO_Biological_Process_2023__Phospholipase C-activating G Protein-Coupled Receptor Signaling Pathway (GO:0007200)	-0.518607	-2.35767	0	0.00468705	0.108	11/24	9.90%	CHRM2;HTR2C;LPAR1;HTR2A;OPRM1;OPRL1;GNA14;OPRD1;P2RY12;LPAR6;GNA15	L5ET
279	MSigDB_Hallmark_2020__Myc Targets V1	-0.293363	-2.33886	0	0.0056582	0.135	120/180	45.13%	RAN;EEF1B2;VBP1;DEK;LSM7;RPL6;USP1;DDX18;GNL3;H2AZ1;PSMA7;SET;NHP2;EIF2S2;POLE3;NME1;CCT5;PSMA4;NCBP2;POLD2;CCT3;RPS10;EIF1AX;RPS3;HSP90AB1;PSMC4;ILF2;ERH;MCM4;RPS2;PWP1;HNRNPA1;KPNA2;TCP1;CCT7;HSPE1;CCT2;PRPF31;PSMB3;NDUFAB1;TUFM;COX5A;CYC1;MRPS18B;RPL14;CNBP;UBE2L3;RANBP1;CSTF2;HSPD1;SRSF3;RPS5;STARD7;EIF2S1;PCBP1;SNRPB2;C1QBP;RSL1D1;EIF3D;SF3B3;RPS6;PTGES3;ETF1;PSMD8;COPS5;SRM;PPIA;PRDX3;VDAC1…	L5ET
280	GO_Biological_Process_2023__Ribosome Assembly (GO:0042255)	-0.441622	-2.32651	0	0.00619594	0.155	26/36	34.81%	MRPL20;NOA1;RPS19;RPL6;RPS15;NOP53;NGRN;RRP7A;RPS28;SBDS;RPS5;EIF2S1;C1QBP;RPSA;RPL10;ERAL1;RPS14;MRPL22;DHX37;RPF2;RPLP0;RPL11;RPS27;MRPS7;RPL23A;RPL5	L5ET
281	GO_Molecular_Function_2023__Histone H3 Methyltransferase Activity (GO:0140938)	0.370449	2.31492	0	0.167066	0.226	21/28	30.98%	DOT1L;EHMT2;SETD1A;SETDB1;SETMAR;NSD2;PRMT2;SUV39H2;SETD3;SETD7;KMT2A;SETDB2;SETD5;NSD3;KMT2E;KMT2C;SETBP1;SETD2;JARID2;EHMT1;NSD1	L5ET
282	GO_Cellular_Component_2023__Respiratory Chain Complex I (GO:0045271)	-0.434065	-2.2998	0	0.00747897	0.194	29/38	38.23%	NDUFB11;NDUFS3;NDUFA11;NDUFB4;NDUFA13;NDUFA2;NDUFB7;NDUFS5;NDUFAB1;NDUFA4;NDUFA6;NDUFC2;NDUFC1;NDUFS6;NDUFV2;NDUFB8;NDUFA1;NDUFS7;NDUFB9;NDUFA9;NDUFS8;NDUFB1;NDUFB10;NDUFAF1;NDUFA3;NDUFB3;NDUFA12;NDUFB5;NDUFA8	L5ET
283	GO_Cellular_Component_2023__Mitochondrial Respiratory Chain Complex I (GO:0005747)	-0.434065	-2.2998	0	0.00747897	0.194	29/38	38.23%	NDUFB11;NDUFS3;NDUFA11;NDUFB4;NDUFA13;NDUFA2;NDUFB7;NDUFS5;NDUFAB1;NDUFA4;NDUFA6;NDUFC2;NDUFC1;NDUFS6;NDUFV2;NDUFB8;NDUFA1;NDUFS7;NDUFB9;NDUFA9;NDUFS8;NDUFB1;NDUFB10;NDUFAF1;NDUFA3;NDUFB3;NDUFA12;NDUFB5;NDUFA8	L5ET
284	GO_Biological_Process_2023__Gene Expression (GO:0010467)	-0.272482	-2.25516	0	0.0113811	0.28	145/241	42.11%	ADARB2;NOX4;RPL10A;RPLP1;MRPL51;RPS19;RPS21;MRPL55;RPL6;MRPL27;RPL38;RPS11;RPL36AL;PRPF4;MRPS12;TSPAN14;RPS9;RPS15;NCBP2;RPS3A;RPS10;MRPS18C;MRPL11;ALKBH5;RPS3;EEF1A2;MRPL14;RPS27A;RPL26;ABCF1;RPS2;FAU;RBPMS;RPL36;TESC;EXOSC2;RPS13;RPS25;RPS18;MRPS18A;MRPS6;RPL21;MRPS5;MRPL34;RPL19;RPS4Y1;MRPL41;MRPS18B;RPL13;PABPN1;RPL14;RPS28;ZNF830;EXOSC6;RPS7;RPLP2;RPL29;MRPS14;RBM8A;HSPD1;SRSF3;DDX39B;RPS5;H…	L5ET
285	GO_Cellular_Component_2023__Mitochondrial Proton-Transporting ATP Synthase Complex (GO:0005753)	-0.585068	-2.2413	0	0.0126153	0.319	15/16	37.29%	ATP5F1D;ATP5PF;ATP5F1E;ATP5MF;ATP5MC3;ATP5ME;ATP5MC1;ATP5F1B;ATP5MG;ATP5MK;ATP5MJ;ATP5PB;ATP5F1C;ATP5PD;ATP5PO	L5ET
286	GO_Cellular_Component_2023__Proton-Transporting ATP Synthase Complex (GO:0045259)	-0.585068	-2.2413	0	0.0126153	0.319	15/16	37.29%	ATP5F1D;ATP5PF;ATP5F1E;ATP5MF;ATP5MC3;ATP5ME;ATP5MC1;ATP5F1B;ATP5MG;ATP5MK;ATP5MJ;ATP5PB;ATP5F1C;ATP5PD;ATP5PO	L5ET
287	KEGG_2021_Human__Prion disease	-0.280062	-2.23389	0	0.0130001	0.335	112/194	38.51%	NDUFB11;COX8A;COX7C;NDUFS3;TUBA1C;CREB3L2;HSPA5;PSMC1;COX7A1;NDUFA11;PSMA7;RAC1;GRIN3A;PSMA4;NDUFB4;NDUFA13;TUBB4A;NDUFA2;PSMC4;ITPR2;PSMD2;ATF4;ATP5F1D;PSMC5;SDHD;NDUFB7;STIP1;C5;ATP5PF;NDUFS5;TUBA4A;TUBB4B;PSMB6;PSMB3;NDUFAB1;PPIF;EGR1;ATP5F1E;PSMB4;NDUFA4;COX5A;NDUFA6;CYC1;ATP5MC3;COX6A1;HSPA8;SLC25A5;NDUFC2;TUBB;PIK3CD;NDUFC1;UQCR10;PRKACA;COX6B1;NDUFS6;EIF2S1;ATP5MC1;ATP5F1B;NDUFV2;NDUFB8;CO…	L5ET
288	GO_Biological_Process_2023__Energy Derivation By Oxidation Of Organic Compounds (GO:0015980)	-0.428158	-2.2336	0	0.0126389	0.335	26/36	37.51%	COX8A;COX7C;SLC25A13;COX15;MRAP2;MT3;NDUFA4;COX5A;CYC1;COX6A1;UQCR10;COX6B1;COX7B;COX5B;COX4I1;SDHAF4;UQCRQ;CYCS;UQCR11;NR4A3;COX6C;UQCRH;CHCHD5;COX7A2;MTLN;UQCRB	L5ET
289	GO_Biological_Process_2023__Negative Regulation Of Protein Depolymerization (GO:1901880)	0.426579	2.19659	0	0.232194	0.406	19/19	57.42%	SPEF1;TPX2;LIMA1;KATNB1;APC2;TTBK2;CLASP2;NAV3;CLASP1;CAMSAP2;TAOK1;PIK3CA;HDGFL3;ATXN7;STMN2;BMERB1;ARHGEF2;FGF13;CKAP2	L5ET
290	MSigDB_Hallmark_2020__mTORC1 Signaling	-0.286268	-2.1836	0	0.0206522	0.509	102/151	47.15%	CALR;SCD;SYTL2;CORO1A;ATP6V1D;SLC7A11;PNO1;GCLC;HSPA5;INSIG1;HSP90B1;EIF2S2;CTH;ADD3;ACLY;PSMA4;STARD4;TPI1;PRDX1;PSMC4;ADIPOR2;TXNRD1;VLDLR;ASNS;CACYBP;GAPDH;TOMM40;MCM4;STIP1;AK4;LGMN;HSPE1;TUBA4A;GSR;HMGCS1;PPP1R15A;GLRX;M6PR;IDI1;PDAP1;EEF1E1;FADS2;HSPD1;ATP5MC1;SQLE;ETF1;COPS5;ARPC5L;PDK1;PPA1;PSMD12;PPIA;MTHFD2L;ACTR3;PGM1;MLLT11;CCNG1;SC5D;FADS1;UCHL5;PGK1;DDIT3;PIK3R3;ABCF2;EDEM1;GLA;UNG;…	L5ET
291	WikiPathway_2023_Human__Host Pathogen Interaction Of Human Coronaviruses Apoptosis WP4864	0.466213	2.17881	0	0.194816	0.439	7/15	5.85%	MAPK12;BAX;CASP8;MAPK11;CASP9;MAPK14;CASP3	L5ET
292	GO_Biological_Process_2023__Protein Localization To Centrosome (GO:0071539)	0.467286	2.17227	0.00390625	0.161516	0.449	15/15	53.34%	CEP250;STIL;CSNK1D;CEP192;HOOK3;CCDC14;PIBF1;SNX10;NUDCD3;C2CD3;GOLGB1;KIAA0753;MBD1;CEP83;DCTN2	L5ET
293	GO_Cellular_Component_2023__Mitochondrial Membrane (GO:0031966)	-0.246304	-2.17212	0	0.0229306	0.556	246/413	43.58%	VRK2;MRPL20;MRPL30;TOMM22;NDUFB11;COX8A;COX7C;NDUFS3;MRPS10;UBB;MRPL51;ENDOG;MRPL55;TMEM14C;NDUFA11;MRPL27;UQCC2;SLC25A11;BCL2;MRPL46;MRPS34;TMEM14B;MRPS12;NDUFAF4;SLC25A13;DMAC1;SMDT1;COX15;COX18;UBA52;NDUFB4;MRPS22;NDUFA13;NDUFA2;MRPS18C;MRPL11;RPS3;PGRMC1;MRPL44;MTARC1;MRPL14;RPS27A;RDH13;HIGD1A;TOMM40;TIMM22;ATP5F1D;MAIP1;FUNDC1;GADD45GIP1;TMEM126B;GPD2;SDHD;NDUFB7;NGRN;ZNFX1;EFHD1;MIEF1;ATP5…	L5ET
294	GO_Biological_Process_2023__Cilium Movement (GO:0003341)	0.317341	2.1532	0	0.14951	0.486	13/35	10.78%	DNAI3;CCDC39;HYDIN;TTLL3;SPEF1;CFAP73;ROPN1L;CFAP91;SPAG17;DNAH1;CFAP54;DNAH5;DNAH9	L5ET
295	MSigDB_Hallmark_2020__Epithelial Mesenchymal Transition	-0.314263	-2.14859	0	0.0274948	0.634	40/89	24.34%	COL11A1;LAMA2;SCG2;PRRX1;ITGA2;GLIPR1;DCN;ADAM12;VCAN;WIPF1;SGCD;DPYSL3;COL4A2;MATN2;COL4A1;COL16A1;PFN2;LGALS1;MAGEE1;PPIB;TIMP3;THY1;SPP1;FAS;FUCA1;COL12A1;SFRP4;PVR;RGS4;FN1;SPARC;ACTA2;GJA1;ECM2;SERPINE2;EDIL3;APLP1;CTHRC1;NOTCH2;WNT5A	L5ET
296	GO_Biological_Process_2023__Negative Regulation Of Axon Extension (GO:0030517)	-0.458197	-2.14124	0.00134228	0.0290052	0.662	13/24	18.61%	SEMA3A;SEMA5B;SEMA4A;SEMA5A;SEMA3C;MT3;SEMA3E;SEMA4B;SEMA4D;RNF6;RTN4;SEMA6D;TRIM46	L5ET
297	GO_Biological_Process_2023__Protein Insertion Into Mitochondrial Membrane (GO:0051204)	-0.473304	-2.14039	0.00134048	0.0285569	0.667	14/23	22.39%	ROMO1;TOMM22;COX18;NDUFA13;TIMM8B;TOMM40;TIMM22;MAIP1;TOMM20;TIMM29;TOMM7;HSP90AA1;TIMM10B;MOAP1	L5ET
298	WikiPathway_2023_Human__Nonalcoholic Fatty Liver Disease WP4396	-0.297149	-2.13649	0	0.028912	0.676	70/115	38.23%	NDUFB11;COX8A;COX7C;NDUFS3;COX7A1;NDUFA11;RAC1;IL6R;NDUFB4;NDUFA13;NDUFA2;ADIPOR2;ATF4;SDHD;FAS;NDUFB7;NDUFS5;NDUFAB1;NDUFA4;COX5A;NDUFA6;CYC1;COX6A1;NDUFC2;PIK3CD;NDUFC1;UQCR10;COX6B1;NDUFS6;EIF2S1;NDUFV2;NDUFB8;COX7B;COX5B;UQCRFS1;NDUFA1;NDUFS7;NDUFB9;SDHA;AKT1;MAPK9;COX4I1;NDUFA9;UQCRQ;NDUFS8;NDUFB1;PRKAB2;NDUFB10;ADIPOR1;GSK3A;CYCS;UQCR11;NDUFA3;DDIT3;PIK3R3;CDC42;COX6C;NDUFB3;CYP2E1;SDHC;SRE…	L5ET
299	GO_Biological_Process_2023__Aerobic Respiration (GO:0009060)	-0.358625	-2.1359	0	0.0284194	0.678	38/54	40.75%	NDUFB11;NDUFS3;NDUFA11;NDUFB4;NDUFA13;NDUFA2;BLOC1S1;ATP5F1D;NDUFB7;NDUFS5;NDUFAB1;NDUFA6;NDUFC2;NDUFC1;NDUFS6;NDUFV2;NDUFB8;NDUFA1;NDUFS7;NDUFB9;NDUFA9;CHCHD10;NDUFS8;NDUFB1;NDUFB10;MTFR1;SIRT3;NDUFA3;NDUFB3;SDHC;MDH2;UQCRH;NDUFA12;NDUFB5;UQCRB;NDUFA8;NDUFB6;OXA1L	L5ET
300	GO_Biological_Process_2023__Negative Regulation Of Microtubule Depolymerization (GO:0007026)	0.426498	2.11072	0.00384615	0.168603	0.584	17/17	57.42%	SPEF1;TPX2;KATNB1;APC2;TTBK2;CLASP2;NAV3;CLASP1;CAMSAP2;TAOK1;HDGFL3;ATXN7;STMN2;BMERB1;ARHGEF2;FGF13;CKAP2	L5ET
301	GO_Biological_Process_2023__ATP Biosynthetic Process (GO:0006754)	-0.493415	-2.10755	0.00130719	0.0357872	0.753	17/21	37.29%	SLC25A13;NUDT2;ATP5F1D;ATP5PF;ATP5F1E;ATP5MF;ATP5MC3;ATP5ME;ATP5MC1;ATP5F1B;ATP5MG;ATP5MK;ATP5MJ;ATP5PB;ATP5F1C;ATP5PD;ATP5PO	L5ET
302	GO_Molecular_Function_2023__Protein Phosphatase Inhibitor Activity (GO:0004864)	-0.53205	-2.09421	0	0.0395	0.796	9/16	17.36%	PTN;PABIR1;PPP1R14C;SET;PPP1R11;PPP1R1B;PPP1R9B;PPP1R8;PPP1R2	L5ET
303	GO_Cellular_Component_2023__Mitochondrial Intermembrane Space (GO:0005758)	-0.375154	-2.08084	0	0.0437655	0.827	28/45	35.75%	TRIAP1;PRELID2;CHCHD2;UQCC2;SDHAF3;REXO2;PRELID1;ARL2;ARL2BP;CPOX;BLOC1S1;TIMM8B;NDUFB7;NME4;COX17;TIMM29;TIMM10B;TIMM23;CHCHD10;THOP1;CYCS;AIFM1;CLPB;FBXL4;SOD1;HAX1;CHCHD5;PINK1	L5ET
304	GO_Biological_Process_2023__Negative Regulation Of Cell Cycle (GO:0045786)	-0.390322	-2.0772	0.00122249	0.044602	0.838	23/38	32.52%	RPS6KA2;PTPN3;TP53BP2;HEXIM1;HECA;RNF167;PTPRK;NR4A1;THAP5;BTG1;BRINP3;INHA;BTG3;TFAP4;CDKN1B;BRINP2;TAF6;BMP7;NUDT6;DUSP1;TSPYL2;TRIM35;ZBTB17	L5ET
305	GO_Biological_Process_2023__G Protein-Coupled Receptor Signaling Pathway, Coupled To Cyclic Nucleotide Second Messenger (GO:0007187)	-0.467126	-2.07188	0.00394218	0.0459671	0.851	8/22	5.08%	CHRM2;HTR2C;CALCRL;HTR2A;OPRM1;HTR1F;CHRM5;OPRD1	L5ET
306	GO_Biological_Process_2023__Extracellular Structure Organization (GO:0043062)	-0.377693	-2.06998	0.00249377	0.0446887	0.851	17/42	13.19%	COL4A5;ADAMTS17;COL11A1;HPSE2;ADAMTS16;ADAMTS3;COL19A1;ADAMTS1;COL4A2;MATN2;COL23A1;COL4A1;COL16A1;MMP16;SPOCK2;ADAMTS18;PXDN	L5ET
307	GO_Biological_Process_2023__External Encapsulating Structure Organization (GO:0045229)	-0.377693	-2.06998	0.00249377	0.0446887	0.851	17/42	13.19%	COL4A5;ADAMTS17;COL11A1;HPSE2;ADAMTS16;ADAMTS3;COL19A1;ADAMTS1;COL4A2;MATN2;COL23A1;COL4A1;COL16A1;MMP16;SPOCK2;ADAMTS18;PXDN	L5ET
308	GO_Biological_Process_2023__Protein Targeting To ER (GO:0045047)	-0.490403	-2.06704	0.00271003	0.0447027	0.852	14/19	32.55%	MAN1A1;SGTB;SPCS3;SEC62;SRPRB;SRP9;SRP14;SEC61G;ZFAND2A;SPCS1;SRPRA;ZFAND2B;SRP72;EDEM1	L5ET
309	WikiPathway_2023_Human__miRNA Regulation Of P53 Pathway In Prostate Cancer WP3982	0.43788	2.05555	0.00668896	0.207559	0.698	6/15	6.48%	BAX;SHISA5;CASP8;CASP9;CASP3;SIAH1	L5ET
310	GO_Biological_Process_2023__Mitochondrial Transport (GO:0006839)	-0.366044	-2.05104	0.00251889	0.0499365	0.885	26/43	32.68%	TOMM22;BCL2;BCAP31;SLC25A13;COX18;TIMM8B;TOMM40;MAIP1;TOMM20;BNIP3;PPIF;TOMM7;HSP90AA1;SLC25A5;DNAJC19;TIMM23;KIFBP;VPS35;TOMM34;FIS1;SLC25A4;BAD;MFN2;SLC25A24;BCL2L1;TOMM70	L5ET
311	GO_Molecular_Function_2023__Calcium Channel Regulator Activity (GO:0005246)	-0.471922	-2.04052	0	0.0540067	0.9	10/21	13.06%	PRKG1;PHPT1;SGK1;CACNB3;SRI;SGK3;CACNG4;CALM2;MCUB;SLC30A1	L5ET
312	KEGG_2021_Human__Alzheimer disease	-0.24525	-2.04039	0	0.0530424	0.9	136/261	37.72%	HRAS;NOX4;NDUFB11;COX8A;COX7C;NDUFS3;TUBA1C;CDK5;CHRM5;PSMC1;COX7A1;NDUFA11;PSMA7;CALM2;CDK5R1;PSMA4;NDUFB4;NDUFA13;AXIN2;TUBB4A;NDUFA2;WNT2B;APH1A;ATG2A;NCSTN;PSMC4;ITPR2;PSMD2;ATF4;GAPDH;ATP5F1D;PSMC5;PSENEN;SDHD;FAS;NDUFB7;CALM3;ATP5PF;NDUFS5;TUBA4A;TUBB4B;MAP2K2;PSMB6;PSMB3;NDUFAB1;PPIF;ATP5F1E;PSMB4;NDUFA4;COX5A;NDUFA6;CYC1;RTN4;ATP5MC3;COX6A1;SLC25A5;NDUFC2;TUBB;PIK3CD;NDUFC1;UQCR10;COX6B1;…	L5ET
313	GO_Biological_Process_2023__Mitochondrial Electron Transport, NADH To Ubiquinone (GO:0006120)	-0.402473	-2.03755	0.00127877	0.0535007	0.908	25/33	40.58%	NDUFS3;NDUFB4;NDUFA2;NDUFB7;NDUFS5;NDUFAB1;NDUFA4;NDUFA6;NDUFC2;NDUFC1;NDUFS6;NDUFV2;NDUFB8;NDUFS7;NDUFB9;NDUFA9;NDUFS8;NDUFB1;NDUFB10;NDUFAF1;NDUFA3;NDUFB3;NDUFB5;NDUFA8;NDUFB6	L5ET
314	GO_Biological_Process_2023__Sensory Organ Development (GO:0007423)	-0.442118	-2.03575	0.00131926	0.0535286	0.909	15/25	27.47%	NEUROD6;CHD7;BMPR1B;MEIS1;ZDHHC16;PBX3;HIPK2;SHROOM2;ADAMTS18;ECE1;TGFB2;SMG9;POLR2D;SH3PXD2B;HIPK1	L5ET
315	GO_Biological_Process_2023__Neural Crest Cell Migration (GO:0001755)	-0.462552	-2.03159	0	0.0544368	0.915	11/21	17.06%	SEMA3A;ERBB4;SEMA5B;SEMA4A;SEMA5A;SEMA3C;SEMA3E;SEMA4B;SEMA4D;FN1;SEMA6D	L5ET
316	GO_Biological_Process_2023__Regulation Of Ruffle Assembly (GO:1900027)	-0.496269	-2.0257	0.00291121	0.0562798	0.925	7/17	8.12%	ARHGAP24;HRAS;PFN1;KANK1;P2RY12;PFN2;EPS8	L5ET
317	GO_Biological_Process_2023__Chaperone-Mediated Protein Complex Assembly (GO:0051131)	-0.472719	-2.01265	0	0.0625793	0.948	13/19	28.09%	PFDN6;BBS12;HSP90AB1;CCT2;LONP1;TMEM35A;PSMG3;HSP90AA1;HSPD1;PTGES3;HSPA1A;BBS10;NDUFAF1	L5ET
318	GO_Cellular_Component_2023__Mitochondrial Envelope (GO:0005740)	-0.285467	-2.00489	0.00110497	0.0658835	0.959	57/105	36.47%	VRK2;TRIAP1;PRELID2;NDUFS3;CHCHD2;TMEM14C;UQCC2;TMEM14B;SDHAF3;REXO2;NDUFAF4;PRELID1;ARL2;NDUFA13;ARL2BP;NDUFA2;CPOX;BLOC1S1;TIMM8B;SDHD;NDUFB7;NGRN;NME4;BNIP3;COX17;TIMM29;NDUFAB1;IFI6;NDUFA6;TIMM10B;TIMM23;FKBP8;SLC25A28;ATP5F1B;GPAM;NDUFA1;SLC25A33;NDUFA9;CHCHD10;THOP1;TMEM70;VDAC1;VDAC2;CYCS;SLC25A4;AIFM1;BNIP1;CLPB;FBXL4;TOMM70;SOD1;HAX1;CHCHD5;SLC8B1;ABCB8;PINK1;MAVS	L5ET
319	KEGG_2021_Human__Thermogenesis	-0.258122	-2.00052	0	0.0672581	0.965	95/177	37.51%	PRKG1;HRAS;NDUFB11;COX8A;COX7C;NDUFS3;RPS6KA2;CREB3L2;FGFR1;COX7A1;NDUFA11;ACTB;NDUFAF4;COX15;COX18;NDUFB4;NDUFA13;NDUFA2;PNPLA2;ATP5F1D;SDHD;NDUFB7;ATP5PF;ACTG1;NDUFS5;MLST8;COX17;MGLL;NDUFAB1;ATP5F1E;NDUFA4;COX5A;ATP5MF;NDUFA6;CPT1C;CYC1;ATP5MC3;COX6A1;ADCY7;NDUFC2;ATP5ME;SMARCC2;NDUFAF3;NDUFC1;COX14;UQCR10;PRKACA;COX6B1;NDUFS6;ATP5MC1;ATP5F1B;SMARCB1;NDUFV2;NDUFB8;COX7B;COX5B;UQCRFS1;NDUFA1;ND…	L5ET
320	WikiPathway_2023_Human__5Q35 Copy Number Variation WP5380	-0.302607	-1.99719	0	0.0679028	0.967	34/80	23.28%	TSPAN17;TRIAP1;COX8A;COX7C;PDLIM7;COX7A1;INPP5D;PRELID1;PNPLA2;HIGD2A;ARFGAP2;NELFB;DDX41;BABAM1;PLCG1;SNCB;KIAA1191;ABRAXAS1;COX5A;GNAI2;GAB1;COX6A1;H3-3A;COX6B1;SRC;TMED9;COX7B;COX5B;PRR7;DBN1;HIC2;NTN1;MAPK9;COX4I1	L5ET
321	GO_Biological_Process_2023__Regulation Of Neuron Differentiation (GO:0045664)	-0.347686	-1.99457	0.00116686	0.0685577	0.967	23/50	25.87%	GPRC5B;RELN;CALR;NREP;FGFR1;YWHAH;VWC2;CDK5R1;ALK;ZFHX3;DLL1;MMD;IMPACT;ECT2;BRINP3;DTX1;BRINP2;HEY1;PCP4;BMP7;GDPD5;MMD2;RHOA	L5ET
322	GO_Molecular_Function_2023__Receptor Ligand Activity (GO:0048018)	-0.305829	-1.98993	0	0.070294	0.972	38/78	27.04%	CCK;SST;SEMA3A;PTN;SEMA5B;KITLG;SEMA4A;CHGB;VGF;SEMA5A;PDGFB;TAFA4;METRN;DLL1;SEMA3C;WNT2B;TAFA2;TNFSF12;CX3CL1;EGF;OSGIN2;GDF11;SEMA3E;SEMA4B;SEMA4D;INHA;AIMP1;SEMA6D;DPP4;TGFB2;BTC;HSPA1A;BMP7;SEMA7A;WNT5A;LRPAP1;WNT10B;IL34	L5ET
323	KEGG_2021_Human__Neuroactive ligand-receptor interaction	-0.285714	-1.98886	0.00112613	0.069703	0.972	24/99	8.58%	CHRM2;HTR2C;CCK;SST;CALCRL;GRIK1;LPAR1;HTR2A;OPRM1;RXFP1;OPRL1;GRM2;GRIA4;HTR1F;CHRM5;GLRA2;OPRD1;P2RY14;GRIN3A;GABRQ;LPAR6;HRH1;GABRG1;NTSR1	L5ET
324	GO_Molecular_Function_2023__NADH Dehydrogenase (Quinone) Activity (GO:0050136)	-0.395106	-1.98563	0.00383142	0.0697419	0.976	24/32	40.58%	NDUFS3;NDUFB4;NDUFA2;NDUFB7;NDUFS5;NDUFA4;NDUFA6;NDUFC2;NDUFC1;NDUFS6;NDUFV2;NDUFB8;NDUFS7;NDUFB9;NDUFA9;NDUFS8;NDUFB1;NDUFB10;NDUFA3;NDUFB3;NDUFA12;NDUFB5;NDUFA8;NDUFB6	L5ET
325	GO_Molecular_Function_2023__NADH Dehydrogenase (Ubiquinone) Activity (GO:0008137)	-0.395106	-1.98563	0.00383142	0.0697419	0.976	24/32	40.58%	NDUFS3;NDUFB4;NDUFA2;NDUFB7;NDUFS5;NDUFA4;NDUFA6;NDUFC2;NDUFC1;NDUFS6;NDUFV2;NDUFB8;NDUFS7;NDUFB9;NDUFA9;NDUFS8;NDUFB1;NDUFB10;NDUFA3;NDUFB3;NDUFA12;NDUFB5;NDUFA8;NDUFB6	L5ET
326	GO_Biological_Process_2023__Establishment Of Protein Localization To Mitochondrion (GO:0072655)	-0.38353	-1.98521	0.00504414	0.0689435	0.977	26/34	45.20%	ROMO1;TOMM22;BCAP31;GRPEL1;TIMM8B;TOMM40;TOMM20;RALA;TIMM23B;TOMM7;DNAJC19;TIMM23;HSPD1;AKT1;TOMM34;FIS1;TOMM40L;MFN2;TOMM70;GRPEL2;PINK1;TIMM13;TIMM21;TIMM44;FBXO7;TIMM9	L5ET
327	GO_Biological_Process_2023__Ribosomal Small Subunit Biogenesis (GO:0042274)	-0.309671	-1.98454	0	0.0684484	0.977	40/71	32.93%	RIOK1;PNO1;RPS19;WDR36;RPS11;MRPS12;RPS9;RPS15;RPS3A;SURF6;RPS13;RPS25;UTP18;RRP7A;RPS28;RPS7;UTP15;UTP3;LTV1;RPS5;DNTTIP2;SRFBP1;RPS6;SNU13;RPSA;RPS23;UTP6;DIMT1;RPS16;ERAL1;RPS14;RPS4X;NOP14;RPS15A;WDR3;DHX37;RPS27;RPS8;MRPS7;FBL	L5ET
328	WikiPathway_2023_Human__Pathogenic Escherichia Coli Infection WP2272	-0.384738	-1.97503	0.00500626	0.0726158	0.984	28/34	52.03%	ARPC4;TUBA1C;ACTB;NCL;ARPC5;TUBB4A;ARPC1A;ACTG1;TUBA4A;TUBB4B;TUBB;TUBB2A;ARPC5L;RHOA;TUBA1A;NCK1;CDC42;TUBA1B;FYN;YWHAZ;ARPC3;ARPC2;ARHGEF2;WASL;TUBA8;YWHAQ;ITGB1;ABL1	L5ET
329	GO_Biological_Process_2023__Mitochondrial Translation (GO:0032543)	-0.295613	-1.97035	0.00229095	0.074398	0.988	44/80	33.67%	MRPL20;MRPL30;MRPS10;MRPL51;MRPL55;MRPL27;MTIF2;MRPL46;MRPS34;MRPS12;MRPS22;MRPS18C;MRPL11;MRPL44;MRPL14;GADD45GIP1;CHCHD1;MRPL33;MRPS18A;MRPS6;MRPS5;TUFM;MRPL34;MRPL41;MRPS18B;MRPL21;MRPS14;IARS2;MRPS33;MRPL16;GATC;MRPL58;MRPS16;MRPL22;MRPL37;MRPS15;MRPL45;MRPL57;MTRF1;EARS2;MRPL3;MRPS7;MRPL35;MRPL23	L5ET
330	GO_Molecular_Function_2023__Sodium Channel Activity (GO:0005272)	0.341051	1.96919	0	0.309214	0.877	16/22	31.09%	SCN4B;ASIC2;GRIK4;GRIK2;SCN1B;HCN2;GRIK5;NALCN;GRIK3;HCN1;SCN1A;SCN3A;SCN2A;SCN8A;KCNK1;PKD2	L5ET
331	KEGG_2021_Human__Huntington disease	-0.239675	-1.96909	0	0.0741729	0.989	123/234	37.74%	POLR2L;NDUFB11;COX8A;COX7C;NDUFS3;GRIA4;DCTN6;TUBA1C;CREB3L2;SLC1A3;POLR2J;PSMC1;COX7A1;NDUFA11;PSMA7;PSMA4;POLR2I;NDUFB4;NDUFA13;TUBB4A;NDUFA2;ATG2A;POLR2E;SLC1A2;PSMC4;AP2M1;PSMD2;DNAH12;ATP5F1D;PSMC5;SDHD;NDUFB7;ATP5PF;NDUFS5;DCTN1;POLR2K;TUBA4A;TUBB4B;PSMB6;PSMB3;DCTN3;NDUFAB1;PPIF;ATP5F1E;PSMB4;ACTR1B;NDUFA4;COX5A;NDUFA6;CYC1;ATP5MC3;COX6A1;STX1A;SLC25A5;NDUFC2;TUBB;NDUFC1;UQCR10;POLR2C;COX6…	L5ET
332	KEGG_2021_Human__Non-alcoholic fatty liver disease	-0.270335	-1.96334	0.00107875	0.0772435	0.991	70/120	38.23%	NDUFB11;COX8A;COX7C;NDUFS3;COX7A1;NDUFA11;RAC1;IL6R;NDUFB4;NDUFA13;NDUFA2;ADIPOR2;ATF4;SDHD;FAS;NDUFB7;NDUFS5;NDUFAB1;NDUFA4;COX5A;NDUFA6;CYC1;COX6A1;NDUFC2;PIK3CD;NDUFC1;UQCR10;COX6B1;NDUFS6;EIF2S1;NDUFV2;NDUFB8;COX7B;COX5B;UQCRFS1;NDUFA1;NDUFS7;NDUFB9;SDHA;AKT1;MAPK9;COX4I1;NDUFA9;UQCRQ;NDUFS8;NDUFB1;PRKAB2;NDUFB10;ADIPOR1;GSK3A;CYCS;UQCR11;NDUFA3;DDIT3;PIK3R3;CDC42;COX6C;NDUFB3;CYP2E1;SDHC;SRE…	L5ET
333	GO_Biological_Process_2023__Actin Filament Bundle Assembly (GO:0051017)	-0.476512	-1.95892	0.00275482	0.0786351	0.993	9/18	14.95%	NEDD9;PAWR;MYO1B;DPYSL3;HSP90B1;FSCN1;EPS8;SHROOM2;PLS3	L5ET
334	GO_Cellular_Component_2023__Specific Granule Membrane (GO:0035579)	-0.337139	-1.95778	0.00123457	0.0785029	0.993	36/49	47.33%	TMEM63A;ATP6V1D;CD36;TSPAN14;LAMTOR2;LAMTOR1;LAMTOR3;PGRMC1;ATP8B4;VAMP1;SLC15A4;DEGS1;RAP2B;TMEM30A;HVCN1;ORMDL3;MLEC;PLD1;CKAP4;CEACAM1;MMP24;UBR4;CLU;PTPRJ;DNAJC5;PTPRB;STK10;SLC2A3;CD59;MOSPD2;STOM;DGAT1;ITGAV;HMOX2;SNAP23;SCAMP1	L5ET
335	GO_Biological_Process_2023__Mitochondrial Respiratory Chain Complex Assembly (GO:0033108)	-0.301924	-1.95601	0.00232019	0.0786	0.993	38/74	30.69%	NDUFB11;NDUFS3;NDUFA11;UQCC2;SDHAF3;NDUFAF4;DMAC1;COX18;NDUFB4;NDUFA13;NDUFA2;TMEM126B;NDUFB7;TMEM126A;NDUFS5;COX17;CHCHD7;NDUFAB1;NDUFA6;NDUFC2;NDUFAF3;NDUFC1;COX14;NDUFB8;UQCRFS1;NDUFA1;SCO1;NDUFS7;NDUFB9;SLC25A33;SDHAF4;NDUFA9;NDUFS8;NDUFB1;NDUFB10;NDUFAF1;AIFM1;NDUFA3	L5ET
336	GO_Cellular_Component_2023__Organelle Envelope Lumen (GO:0031970)	-0.341877	-1.95272	0.00473934	0.0794996	0.994	29/50	35.75%	TRIAP1;PRELID2;CHCHD2;UQCC2;SDHAF3;REXO2;PRELID1;ARL2;ARL2BP;CPOX;BLOC1S1;TIMM8B;NDUFB7;NME4;COX17;TIMM29;TIMM10B;TIMM23;TUBB2A;CHCHD10;THOP1;CYCS;AIFM1;CLPB;FBXL4;SOD1;HAX1;CHCHD5;PINK1	L5ET
337	WikiPathway_2023_Human__GPCRs Class A Rhodopsin Like WP455	-0.332571	-1.94766	0.00241255	0.0819661	0.994	17/49	12.65%	CHRM2;HTR2C;HTR2A;GPR37;OPRM1;OPRL1;HTR1F;CHRM5;OPRD1;P2RY14;P2RY12;GPR27;LPAR6;HRH1;NTSR1;OR6A2;NPY1R	L5ET
338	GO_Biological_Process_2023__Ribonucleoprotein Complex Biogenesis (GO:0022613)	-0.280778	-1.94353	0	0.0839242	0.994	78/99	55.04%	ZNF622;TMA16;RIOK1;PNO1;RPS19;RPL38;WDR36;RPS11;MRPS12;RPS9;RPS15;MRTO4;RPS3A;SURF6;RPL26;GLUL;SDAD1;CINP;RPS13;RPS25;UTP18;RRP7A;RPL14;RPS28;RPS7;UTP15;UTP3;LTV1;RPS5;WDR74;DNTTIP2;RPS6;SNU13;RPS23;UTP6;DIMT1;RPS16;RPS14;RPS4X;NOP14;RPS15A;WDR3;DHX37;RPF2;HEATR3;RPL11;RPS27;RPS8;FBL;RPL5;SHQ1;EBNA1BP2;MPHOSPH10;NVL;UTP11;URB2;RPS24;METTL17;NOL7;MALSU1;NOC2L;SPATA5;HEATR1;RPL35A;CUL4B;NAT10;FCF1;…	L5ET
339	GO_Molecular_Function_2023__Heme Binding (GO:0020037)	0.269753	1.94286	0	0.325864	0.912	16/37	15.89%	CYP2R1;NOX5;RSAD1;NRG1;PTGES2;CYP2U1;CYP1B1;NR1D1;TDO2;THAP4;CYP46A1;SLC48A1;CYP26B1;PXDNL;JAK2;CYB5R4	L5ET
340	MSigDB_Hallmark_2020__Oxidative Phosphorylation	-0.249477	-1.93903	0	0.0860366	0.995	99/182	37.51%	TOMM22;COX8A;ATP6V1D;COX7C;NDUFS3;ETFB;SLC25A11;GRPEL1;MRPS12;COX15;GPX4;NDUFB4;MRPS22;NDUFA2;MRPL11;ATP6AP1;IDH3B;TIMM8B;ATP5F1D;PDP1;SDHD;NDUFB7;ATP6V1G1;ATP5PF;COX17;LDHB;NDUFAB1;ATP6V1F;ATP5F1E;MRPL34;NDUFA4;COX5A;ATP5MF;NDUFA6;ATP6V0B;CYC1;ATP5MC3;ALDH6A1;COX6A1;SLC25A5;NDUFC2;CYB5A;ATP5ME;NDUFC1;UQCR10;COX6B1;NDUFS6;ATP5MC1;ATP5F1B;NDUFV2;NDUFB8;COX7B;COX5B;UQCRFS1;NDUFA1;NDUFS7;SDHA;COX4I1…	L5ET
341	KEGG_2021_Human__DNA replication	0.334846	1.93474	0.00760456	0.311788	0.92	11/23	15.47%	RFC5;RPA3;RNASEH1;POLE4;RFC2;POLD3;RFC3;MCM6;RNASEH2B;POLE;DNA2	L5ET
342	GO_Biological_Process_2023__Mesenchymal Cell Migration (GO:0090497)	-0.44364	-1.93393	0.00264201	0.0887337	0.995	10/20	17.06%	SEMA3A;ERBB4;SEMA5B;SEMA4A;SEMA5A;SEMA3C;SEMA3E;SEMA4B;SEMA4D;SEMA6D	L5ET
343	GO_Cellular_Component_2023__Small-Subunit Processome (GO:0032040)	-0.312937	-1.93328	0.00116686	0.0880255	0.995	34/61	32.93%	DCAF13;PNO1;RPS19;WDR36;RPS11;MRPS12;RPS9;RPS3A;FBLL1;RPS27A;RPS13;UTP18;RRP7A;RPS28;RPS7;UTP15;UTP3;RPS5;DNTTIP2;RPS6;SNU13;RPS23;UTP6;DIMT1;RPS16;RPS14;RPS4X;NOP14;RPS15A;WDR3;DHX37;RPS27;RPS8;FBL	L5ET
344	WikiPathway_2023_Human__Nsp1 From SARS CoV 2 Inhibits Translation Initiation In The Host Cell WP5027	-0.501712	-1.92652	0.00426136	0.0922447	0.997	13/15	38.97%	EIF5;EIF2S2;EIF1AX;EIF3F;EIF2S3;EIF2S1;EIF3D;EIF1;EIF3I;EIF3E;EIF3B;EIF3J;EIF3A	L5ET
345	GO_Biological_Process_2023__Substantia Nigra Development (GO:0021762)	-0.376065	-1.91895	0.00390117	0.096933	0.998	24/33	43.29%	PLP1;NDUFS3;CNP;HSPA5;CALM2;YWHAH;CALM3;ATP5PF;SYNGR3;ZNF430;INA;ERCC4;COX6B1;GNB4;RHOA;CDC42;ATP5PB;G6PD;CALM1;DYNLL1;BASP1;YWHAE;SUDS3;SIRT2	L5ET
346	GO_Molecular_Function_2023__Semaphorin Receptor Binding (GO:0030215)	-0.473817	-1.91277	0.00138313	0.100299	0.999	9/16	17.06%	SEMA3A;SEMA5B;SEMA4A;SEMA5A;SEMA3C;SEMA3E;SEMA4B;SEMA4D;SEMA6D	L5ET
347	GO_Cellular_Component_2023__Collagen-Containing Extracellular Matrix (GO:0062023)	-0.260516	-1.90928	0.00112108	0.101944	0.999	55/120	28.25%	COL4A5;FGFR2;CBLN4;COL11A1;LAMA2;DCN;VCAN;FGFR1;ADAMTS3;COL19A1;ADAMTS1;COL6A6;PDGFB;COL4A2;HSP90B1;S100A6;MATN2;COL23A1;COL4A1;COL16A1;LGALS1;TIMP3;WNT2B;LTBP1;A2M;FREM1;CRELD1;CTSD;COL12A1;PXDN;LAMA4;L1CAM;AGRN;FN1;SPARC;SERPINE2;PLSCR1;BCAT2;EDIL3;TGFB2;APLP1;CSTB;PZP;SDC2;COL4A3;CTHRC1;ERBIN;SEMA7A;WNT5A;ANGPT2;TIMP2;COL25A1;MXRA7;MMP28;CDH2	L5ET
348	GO_Cellular_Component_2023__Endoplasmic Reticulum Lumen (GO:0005788)	-0.255722	-1.90687	0	0.102872	0.999	72/131	38.77%	COL4A5;ADAMTSL1;CALR;COL11A1;ARSJ;VCAN;F8;HSPA5;COL19A1;CHGB;VGF;PDGFB;COL4A2;HSP90B1;COL23A1;TSPAN14;COL4A1;COL16A1;LGALS1;PPIB;PNPLA2;CST3;P4HA3;P4HB;MELTF;LTBP1;B2M;SPP1;F5;ARSD;ERLEC1;COL12A1;TOR1A;PDGFC;WFS1;TMEM132A;FN1;RNASET2;OS9;APLP2;DNAJC3;PRKCSH;CKAP4;SDC2;COL4A3;HYOU1;TXNDC12;SELENOF;MAPK3;WNT5A;MYDGF;LRPAP1;DNAJB11;COL25A1;CDH2;PDIA5;SGCG;BACE1;CRTAP;TGOLN2;PRSS23;CANX;ANO8;FKBP14;P…	L5ET
349	GO_Biological_Process_2023__Neuron Apoptotic Process (GO:0051402)	-0.488951	-1.90516	0.00864553	0.103138	0.999	7/15	12.89%	CDK5;BCL2;TRPC5;GAPDH;FAS;BNIP3;ATN1	L5ET
350	GO_Cellular_Component_2023__9+2 Motile Cilium (GO:0097729)	0.281973	1.905	0	0.344326	0.958	16/36	17.75%	TTLL3;SPEF1;CABCOCO1;AK8;DNAH1;QRICH2;FLACC1;DNAH2;IQCG;DNAH5;DNAH9;SAXO2;KIF9;ATP2B4;CFAP221;ODAD4	L5ET
351	WikiPathway_2023_Human__Mitochondrial Complex IV Assembly WP4922	-0.413446	-1.90434	0.00267023	0.102604	0.999	18/26	35.49%	COX8A;COX7C;COX15;COX18;HIGD1A;COX17;NDUFA4;COX5A;COX6A1;COX14;COX6B1;COX7B;COX5B;COX4I1;TMEM177;COX6C;COX11;COX7A2	L5ET
352	GO_Biological_Process_2023__Positive Regulation Of Phosphatidylinositol 3-Kinase Signaling (GO:0014068)	-0.373258	-1.90072	0.00261097	0.104448	0.999	14/30	21.08%	DCN;ROR1;UNC5B;FGFR1;PDGFB;EXTL3;EGF;SEMA3E;SEMA4D;PDGFC;FN1;SRC;TGFB2;BECN1	L5ET
353	GO_Biological_Process_2023__Regulation Of Epithelial Cell Migration (GO:0010632)	-0.367059	-1.89791	0.00493218	0.10555	1	15/35	23.62%	ENPP2;DOCK1;PTN;DOCK5;MCC;PFN1;PTPRG;PFN2;GLUL;PLCG1;RTN4;SRC;TGFB2;CEACAM1;PPM1F	L5ET
354	GO_Biological_Process_2023__Protein Targeting To Mitochondrion (GO:0006626)	-0.328963	-1.89294	0.0097561	0.108487	1	33/47	45.37%	ROMO1;TOMM22;BCAP31;GRPEL1;NDUFA13;TIMM8B;TOMM40;TIMM22;TOMM20;TIMM29;TIMM23B;TOMM7;HSP90AA1;DNAJC19;TIMM10B;TIMM23;HSPD1;TOMM34;PMPCA;FIS1;TOMM40L;AIFM1;MFN2;TOMM70;GRPEL2;MTCH1;MTCH2;TIMM13;TIMM21;TIMM44;FBXO7;TIMM9;TRMT10B	L5ET
355	WikiPathway_2023_Human__Selenium Micronutrient Network WP15	-0.351934	-1.88568	0.00761421	0.113828	1	22/36	34.38%	SELENOK;PNPO;SEPHS2;DIO2;CTH;GPX4;PRDX1;TXNRD1;PRDX2;RFK;GSR;PRDX5;SELENOF;PRDX3;SELENOS;SELENOT;FLAD1;SELENOH;TXNRD2;SOD1;SELENOW;LDLR	L5ET
356	GO_Biological_Process_2023__Negative Regulation Of Macroautophagy (GO:0016242)	0.357997	1.88495	0.00735294	0.356786	0.968	19/19	64.26%	SMCR8;USP36;TMEM39A;SCFD1;CLEC16A;RUBCN;FEZ2;PIK3CA;MTOR;TSC1;LRRK2;MTM1;QSOX1;LZTS1;TSC2;NRBP2;FEZ1;SEC22B;PINK1	L5ET
357	GO_Molecular_Function_2023__Transmembrane Receptor Protein Tyrosine Kinase Activity (GO:0004714)	-0.406781	-1.88379	0.00657895	0.114297	1	8/24	9.50%	FGFR2;ERBB4;EPHA3;MET;ROR1;FGFR1;EPHB3;MERTK	L5ET
358	GO_Biological_Process_2023__Regulation Of Stress-Activated MAPK Cascade (GO:0032872)	-0.363013	-1.87914	0.00779221	0.116991	1	17/34	27.06%	GSTP1;TIRAP;MID1;PHLPP1;ARL6IP5;EPHB1;FAS;MAPK8IP1;MAP2K2;IGBP1;PER1;TGFB2;SCIMP;MAPK3;COPS5;PPIA;EIF2AK2	L5ET
359	WikiPathway_2023_Human__Burn Wound Healing WP5055	-0.392661	-1.87126	0.00528402	0.123274	1	16/26	30.80%	FGFR2;NOX4;DCN;FGFR1;BCL2;PECAM1;S100A6;LGALS1;EGF;KRT222;TGFB2;TPT1;AKT1;MMP28;CDK16;HEXD	L5ET
360	GO_Biological_Process_2023__Entrainment Of Circadian Clock By Photoperiod (GO:0043153)	-0.433313	-1.86774	0.0041958	0.124248	1	14/19	37.27%	CRY2;CRY1;RBM4B;PER1;PER2;MTA1;PPP1CC;PDE6B;CRTC1;PER3;PPP1CA;ID2;RBM4;USP2	L5ET
361	GO_Biological_Process_2023__Neuron Migration (GO:0001764)	-0.329086	-1.86046	0.00368098	0.129951	1	12/45	12.32%	RELN;CCK;SEMA3A;DCC;DISC1;CDK5;FGFR1;RAC1;CDK5R1;DNER;DCDC2;SEMA3E	L5ET
362	GO_Biological_Process_2023__Negative Regulation Of Proteasomal Ubiquitin-Dependent Protein Catabolic Process (GO:0032435)	-0.387569	-1.85944	0.00519481	0.129449	1	16/28	31.41%	UBXN1;STYX;NOP53;RYBP;HSP90AB1;TAF9;CCAR2;SVIP;MAP1A;PARK7;SDCBP;USP7;UCHL5;USP14;RPL11;DDRGK1	L5ET
363	GO_Cellular_Component_2023__Postsynaptic Density Membrane (GO:0098839)	0.295831	1.85631	0.00462963	0.390361	0.986	22/30	32.74%	GRIK4;GRIK2;DLG2;GRIA3;CACNG7;GRID1;CACNG8;GRIA2;DLG4;GRIK5;GRIK3;GRIN2A;SYNDIG1;GRIA1;CACNG3;PTPRS;DLG1;GRIN2B;GRM5;GRID2;GRM1;DLG3	L5ET
364	GO_Biological_Process_2023__NADH Dehydrogenase Complex Assembly (GO:0010257)	-0.322732	-1.85574	0.00242131	0.130743	1	26/51	28.09%	NDUFB11;NDUFS3;NDUFA11;NDUFAF4;DMAC1;NDUFB4;NDUFA13;NDUFA2;TMEM126B;NDUFB7;TMEM126A;NDUFS5;NDUFAB1;NDUFA6;NDUFC2;NDUFAF3;NDUFC1;NDUFB8;NDUFA1;NDUFS7;NDUFB9;NDUFA9;NDUFS8;NDUFB1;NDUFB10;NDUFAF1	L5ET
365	GO_Biological_Process_2023__Mitochondrial Respiratory Chain Complex I Assembly (GO:0032981)	-0.322732	-1.85574	0.00242131	0.130743	1	26/51	28.09%	NDUFB11;NDUFS3;NDUFA11;NDUFAF4;DMAC1;NDUFB4;NDUFA13;NDUFA2;TMEM126B;NDUFB7;TMEM126A;NDUFS5;NDUFAB1;NDUFA6;NDUFC2;NDUFAF3;NDUFC1;NDUFB8;NDUFA1;NDUFS7;NDUFB9;NDUFA9;NDUFS8;NDUFB1;NDUFB10;NDUFAF1	L5ET
366	GO_Molecular_Function_2023__Chemorepellent Activity (GO:0045499)	-0.436097	-1.85104	0.00679348	0.134353	1	11/19	23.80%	SEMA3A;SEMA5B;SEMA4A;SEMA5A;SEMA3C;SEMA3E;SEMA4B;SEMA4D;SEMA6D;DPP4;SEMA7A	L5ET
367	KEGG_2021_Human__Pathways of neurodegeneration	-0.214677	-1.84564	0.00101317	0.137523	1	171/343	38.23%	GPR37;HRAS;NOX4;NDUFB11;SNCAIP;COX8A;COX7C;NDUFS3;GRIA4;DCTN6;GABARAPL2;UBB;TUBA1C;CDK5;HSPA5;CHRM5;PSMC1;COX7A1;NDUFA11;PSMA7;RAC1;BCL2;CALM2;CDK5R1;PSMA4;UBA52;NDUFB4;UBE2J1;NDUFA13;AXIN2;TUBB4A;NDUFA2;WNT2B;ATG2A;PSMC4;ITPR2;ATXN1L;PSMD2;DNAH12;ATF4;RPS27A;ATXN2L;TOMM40;ATP5F1D;PSMC5;SDHD;FAS;NDUFB7;CALM3;ATP5PF;NDUFS5;DCTN1;TUBA4A;PLCG1;TUBB4B;MAP2K2;PSMB6;PSMB3;DCTN3;NDUFAB1;PPIF;ATP5F1E;PSM…	L5ET
368	KEGG_2021_Human__ECM-receptor interaction	-0.343904	-1.84383	0.00893997	0.13798	1	15/37	16.86%	RELN;COL4A5;ITGB8;LAMA2;ITGA2;CD36;COL6A6;COL4A2;COL4A1;SPP1;FREM1;LAMA4;ITGA4;AGRN;FN1	L5ET
369	GO_Cellular_Component_2023__Secretory Granule Membrane (GO:0030667)	-0.24168	-1.83915	0	0.141578	1	83/143	44.68%	GLIPR1;TMEM63A;FABP5;ATP6V1D;RAB14;SRI;IRAG2;CD36;RAC1;PECAM1;LAMP2;TSPAN14;RAB9B;LAMTOR2;LAMTOR1;SNAP29;LAMTOR3;NCSTN;PGRMC1;ITPR2;ATP8B4;VAMP1;ATP6AP2;COPB1;MAGT1;SLC15A4;DEGS1;ARL8A;SVIP;RAP2B;SPARC;SLC30A5;NDUFC2;VAMP2;TMEM30A;HVCN1;RAB26;APLP2;ORMDL3;MLEC;PLD1;CCDC136;SYT4;CKAP4;CEACAM1;RHOA;DYNC1LI1;TMEM179B;ATAD3B;CD63;MMP24;GAA;DDOST;RAB3A;SGCG;PSEN1;UBR4;CLU;CYB561;PTPRJ;CD109;DNAJC5;PTP…	L5ET
370	WikiPathway_2023_Human__Mitochondrial Complex I Assembly Model OXPHOS System WP4324	-0.326853	-1.83423	0.00610501	0.14557	1	30/48	38.23%	NDUFB11;NDUFS3;NDUFAF4;DMAC1;NDUFB4;NDUFA13;NDUFA2;TMEM126B;NDUFB7;NDUFS5;NDUFAB1;NDUFA6;NDUFC2;NDUFAF3;NDUFC1;NDUFS6;NDUFV2;NDUFB8;NDUFA1;NDUFB9;NDUFB1;TMEM70;NDUFB10;NDUFAF1;NDUFA3;NDUFB3;NDUFA12;NDUFB5;TIMMDC1;NDUFA8	L5ET
371	MSigDB_Hallmark_2020__KRAS Signaling Up	-0.268286	-1.83226	0.00222469	0.146433	1	50/93	40.24%	GPRC5B;GUCY1A1;RELN;APOD;DUSP6;PRRX1;ITGA2;RBP4;ALDH1A2;ST6GAL1;BPGM;PECAM1;TSPAN7;FBXO4;MMD;ETV1;SPP1;FUCA1;TRIB1;MAP3K1;PPP1R15A;SCG3;GLRX;PTCD2;PCSK1N;ABCB1;CDADC1;TRIB2;BTC;HSD11B1;NAP1L2;PCP4;MTMR10;USP12;SPRY2;TOR1AIP2;TSPAN13;ARG1;DCBLD2;ZNF639;ITGBL1;ID2;RBM4;PRKG2;SPARCL1;BTBD3;CBL;ADGRA2;ERO1A;IL1RL2	L5ET
372	GO_Cellular_Component_2023__Voltage-Gated Calcium Channel Complex (GO:0005891)	0.280993	1.82688	0.00917431	0.406268	0.994	20/31	27.65%	CACNA1H;CACNA2D2;CATSPERG;CACNA2D3;CACNG7;CACNG8;CATSPERE;CACNA1D;CACNA1B;CACNA1A;CACNA1C;CACNG3;PDE4D;CATSPER2;SCN1A;CACNB4;SCN3A;CACNA2D1;SCN2A;SCN8A	L5ET
373	GO_Biological_Process_2023__Positive Regulation Of MAPK Cascade (GO:0043410)	-0.248693	-1.82268	0.00217865	0.154194	1	51/126	29.08%	FGFR2;HTR2C;LPAR1;PELI2;ERBB4;HTR2A;GPR37;ZNF622;HRAS;OPRM1;DOK5;ROR1;FGFR1;TIRAP;TPD52L1;DENND2B;CD36;PDGFB;MID1;LAMTOR1;ARL6IP5;JCAD;CD81;SLC30A10;CX3CL1;EGF;MTURN;MT3;SHC1;PDGFC;ARRB2;DIRAS1;RET;TGFB2;GHR;TENM1;DUSP19;SCIMP;SEMA7A;MAPK3;NOTCH2;MYDGF;PPIA;DSTYK;MAP3K12;IL34;EIF2AK2;SPRY2;KSR1;DDR2;DDT	L5ET
374	GO_Biological_Process_2023__Anterograde Trans-Synaptic Signaling (GO:0098916)	-0.24633	-1.82215	0.00322928	0.153463	1	26/126	9.00%	CHRM2;GAD1;HTR2C;NPTX1;GAD2;SST;GRIK1;PDE7B;HTR2A;PLP1;GRM2;RPS6KA2;CACNB3;CNP;CDK5;HTR1F;CHRM5;SLC1A3;GLRA2;SLC6A1;GABRQ;SCN2B;NPTX2;NTSR1;SYN1;SLC1A2	L5ET
375	GO_Biological_Process_2023__Semaphorin-Plexin Signaling Pathway (GO:0071526)	-0.380414	-1.81637	0.00669344	0.159107	1	11/25	17.06%	SEMA3A;MET;SEMA5B;SEMA4A;SEMA5A;RAC1;SEMA3C;SEMA3E;SEMA4B;SEMA4D;SEMA6D	L5ET
376	MSigDB_Hallmark_2020__Inflammatory Response	-0.300834	-1.80997	0.00700935	0.164176	1	34/57	41.00%	ITGB8;CALCRL;LPAR1;AHR;MET;SRI;PDE4B;HRH1;SLC4A4;SLC1A2;GNA15;CX3CL1;PVR;SEMA4D;TACR1;LY6E;IRF1;EIF2AK2;SGMS2;SELENOS;PSEN1;DCBLD2;IFNGR2;LDLR;KCNA3;P2RX7;NAMPT;RIPK2;GCH1;GABBR1;IFNAR1;CD55;SLC11A2;RELA	L5ET
377	MSigDB_Hallmark_2020__Xenobiotic Metabolism	-0.252833	-1.80089	0.00875274	0.173787	1	64/105	42.81%	GAD1;MAN1A1;PDLIM5;RBP4;GCLC;CYP27A1;CD36;ACP2;BLVRB;PGRMC1;PAPSS2;FAS;ASL;EPHX1;GSR;ETS2;PGD;GSS;SLC35B1;LONP1;PEMT;PMM1;CYB5A;AKR1C3;AHCY;CDO1;ESR1;TGFB2;GART;PTGDS;HSD11B1;DCXR;PTGES3;MPP2;GSTM4;GABARAPL1;ALDH9A1;DDT;ARG2;CBR1;ACOX1;ARPP19;ARG1;SSR3;CYP2E1;KARS1;ENTPD5;ALAS1;ACP1;SLC22A1;ID2;ELOVL5;PINK1;UPP1;SLC6A6;ADH5;GCH1;CNDP2;DHRS7;NPC1;GSTO1;ALDH2;MCCC2;TMEM97	L5ET
378	WikiPathway_2023_Human__IL 24 Signaling Pathway WP5413	-0.241593	-1.79693	0.00325027	0.177153	1	65/127	35.37%	PRKG1;EIF5A;MEIS1;HSPA5;CD200;CD36;BCL2;PECAM1;PDGFB;HSP90B1;S100A6;NDUFA13;ELOB;TXNRD1;ATF4;KEAP1;FAS;HSPE1;DNPH1;PLCG1;ABCG2;MAPKAPK2;MAP3K1;PPP1R15A;PTPA;GSS;EEF1E1;IKBKG;CFLAR;HSP90AA1;ABCB1;PIK3CD;CDKN1B;BMI1;PRKACA;SRC;EIF2S1;PARK7;BECN1;NFE2L2;BSG;RPS6;AKT1;MAPK3;IRF1;DSTN;ILK;EIF2AK2;CYCS;BCL6;STAT3;AIFM1;BAD;MFN2;DDIT3;MAP1LC3A;PSMD9;BCL2L1;TXNRD2;SOD1;IKBKB;TMBIM4;XIAP;ERN1;IRF2	L5ET
379	GO_Biological_Process_2023__Regulation Of Axon Extension Involved In Axon Guidance (GO:0048841)	-0.420511	-1.77435	0.00952381	0.201117	1	9/18	17.06%	SEMA3A;SEMA5B;SEMA4A;SEMA5A;SEMA3C;SEMA3E;SEMA4B;SEMA4D;SEMA6D	L5ET
380	GO_Biological_Process_2023__Mitochondrial Gene Expression (GO:0140053)	-0.26526	-1.76876	0.00917431	0.202353	1	50/82	41.64%	MRPL20;MRPL30;MRPS10;MRPL51;MRPL55;MRPL27;MRPL46;MRPS34;MRPS12;MRPS22;MRPS18C;MRPL11;MRPL44;MRPL14;GADD45GIP1;CHCHD1;MRPL33;MRPS18A;MRPS6;MRPS5;MRPL34;MRPL41;MRPS18B;MRPL21;MRPS14;IARS2;MRPS33;MRPL16;GATC;MRPL58;SLC25A33;MRPS16;MRPL22;MRPL37;MRPS15;MRPL45;MRPL57;MRPL3;MRPS7;MRPL35;TBRG4;MRPL23;TFB2M;MRPS21;MRPL4;QRSL1;MRPL52;MRPL13;MRPL18;TFAM	L5ET
381	MSigDB_Hallmark_2020__Coagulation	-0.30507	-1.76673	0.00830368	0.20212	1	20/49	19.80%	DUSP6;ITGA2;CTSO;F8;RAC1;PECAM1;PDGFB;LAMP2;GNB2;TIMP3;RABIF;A2M;DCT;LGMN;RGN;FN1;SPARC;DPP4;C1S;TF	L5ET
382	GO_Molecular_Function_2023__Manganese Ion Binding (GO:0030145)	0.252314	1.76176	0	0.475204	1	16/36	21.44%	B4GALT7;ABO;ADPRM;FAM20C;XXYLT1;TDP2;MPPE1;NUDT16;HMGCL;GYG1;EXD2;MGAT5;ME1;ADCY2;GALNT1;NEK4	L5ET
383	MSigDB_Hallmark_2020__TNF-alpha Signaling via NF-kB	-0.267412	-1.7617	0.00687285	0.206152	1	47/81	41.02%	MARCKS;PDLIM5;PNRC1;SGK1;PDE4B;MAP3K8;SPSB1;NR4A1;SLC16A6;PLPP3;BTG1;SNN;PHLDA1;TRIB1;DUSP4;PPP1R15A;EGR1;IL6ST;ETS2;ZBTB10;IER2;BTG3;PER1;CFLAR;NFE2L2;TUBB2A;IFIT2;FOSL2;IRF1;EIF1;DUSP1;EGR3;BCL6;NR4A3;KDM6B;PLK2;IFNGR2;LDLR;ID2;DNAJB4;NAMPT;RIPK2;SLC2A3;GCH1;RNF19B;RELA;MCL1	L5ET
384	GO_Biological_Process_2023__Negative Regulation Of Protein Metabolic Process (GO:0051248)	-0.255093	-1.75364	0.00454545	0.211857	1	58/96	43.98%	CALR;VBP1;CDK5;CRYAB;PFDN6;NCL;SHMT1;CST3;RPS3;HSP90AB1;GAPDH;FLOT2;PFDN2;NANOS3;ATRAID;CAPRIN1;SNX12;SERPINE2;NHLRC3;SF3B3;CSTB;AKT1;YBX1;CNOT9;TOB1;EIF2AK2;PFDN4;RNF139;EIF4ENIF1;CNOT1;FXR2;ILF3;RPL13A;PUS7;CLU;ENC1;RACK1;LDLR;RGP1;RBM4;CLN8;NELL1;BAG6;ZNF540;TRIM3;SNX3;MRPL13;EPHA4;PIN1;PFDN1;FMR1;DDX6;PHB1;SYNCRIP;MALSU1;PAIP2B;SIRT2;ITGAV	L5ET
385	GO_Biological_Process_2023__Skeletal System Development (GO:0001501)	-0.280567	-1.73942	0.00828402	0.215872	1	27/67	24.34%	FGFR2;SOX6;ITGB8;CHD7;TLL1;CREB3L2;FGFR1;COL19A1;HHIP;PRDX1;PPIB;MMP16;KIAA1217;TRPS1;GDF11;RAB33B;ETS2;INHA;PLS3;RPL13;AKAP13;GJA1;TGFB2;POLR2D;BMP7;UFD1;WNT5A	L5ET
386	GO_Biological_Process_2023__Regulation Of Cell Growth (GO:0001558)	-0.228795	-1.73767	0.00214592	0.215261	1	69/144	34.07%	PABIR1;PSMD10;SGK1;NDUFS3;SGK3;ING1;CDKN2D;BCL2;PRDM11;LAMTOR2;LAMTOR1;NDUFA13;EI24;MELTF;BTG1;CDK11B;OSGIN2;MT3;EXOSC2;DNPH1;MLST8;PPP1R9B;RAB33B;N6AMT1;DERL2;CCDC85B;CAMK2D;STK11;TP53TG5;CCAR2;RTN4;DNAJB2;CDKN1B;H3-3A;GJA1;PPP2CA;ATAD3A;TGFB2;WFDC1;SLC25A33;AKT1;HSPA1A;CEACAM1;SESN2;SDCBP;JADE2;CRLF3;RASGRP2;SPHK2;LGI1;RNF2;EIF4G2;BCL6;SUPV3L1;PPT1;EBAG9;FHL1;MEAF6;TSPYL2;DCUN1D3;CDC42;FRZB;TAO…	L5ET
387	KEGG_2021_Human__Amyotrophic lateral sclerosis	-0.206669	-1.71702	0.00102564	0.241643	1	141/280	38.51%	ERBB4;NDUFB11;COX8A;COX7C;NDUFS3;DCTN6;GABARAPL2;PFN1;TUBA1C;HSPA5;PSMC1;COX7A1;NDUFA11;ACTB;PSMA7;RAC1;BCL2;PFN2;UBQLN2;PSMA4;NDUFB4;NDUFA13;TUBB4A;NDUFA2;ATG2A;SLC1A2;PSMC4;PSMD2;DNAH12;ATF4;ATXN2L;TOMM40;NUP35;ATP5F1D;HNRNPA1;PSMC5;SDHD;NDUFB7;ATP5PF;ACTG1;NDUFS5;DCTN1;TUBA4A;TUBB4B;PSMB6;PSMB3;DCTN3;NDUFAB1;ATP5F1E;NUP188;PSMB4;ACTR1B;NDUFA4;COX5A;NDUFA6;SEH1L;CYC1;NEFL;ATP5MC3;COX6A1;NDUFC2;…	L5ET
388	KEGG_2021_Human__Axon guidance	-0.223297	-1.69695	0.00537634	0.268019	1	57/140	31.92%	UNC5D;SEMA3A;DCC;HRAS;EPHA3;BMPR1B;MET;UNC5B;NTN4;TRPC6;CDK5;SEMA5B;SEMA4A;LRRC4;SEMA5A;RAC1;PARD6A;EPHB3;PTCH1;TRPC5;CFL1;EPHB1;SEMA3C;PARD3;SEMA3E;SEMA4B;PLCG1;SEMA4D;MYL12B;CAMK2D;GNAI2;L1CAM;SEMA6D;LIMK2;PIK3CD;EFNB3;SRC;LRRC4C;PLXNC1;NTN1;BMP7;SEMA7A;MAPK3;SRGAP1;WNT5A;PLXNA3;RHOA;ILK;CFL2;GNAI1;RND1;DPYSL5;PIK3R3;NCK1;SEMA6C;UNC5C;CDC42	L5ET
389	GO_Biological_Process_2023__Enzyme-Linked Receptor Protein Signaling Pathway (GO:0007167)	-0.292239	-1.69488	0.00930233	0.268105	1	12/53	7.03%	NEDD9;FGFR2;PTN;ERBB4;SHC4;MET;DOK5;ROR1;PTPRT;FGFR1;PTPRG;ALK	L5ET
390	GO_Molecular_Function_2023__Ubiquitin Protein Ligase Binding (GO:0031625)	-0.209782	-1.69161	0.00626305	0.272336	1	95/205	36.71%	CALR;GPR37;UBXN1;SNCAIP;NEDD8;LAPTM4B;GABARAPL2;UBB;HSPA5;SUMO1;FANCL;BCL2;DIO2;MID1;SUMO2;PRR5L;UBA52;TPI1;UBE2J1;AXIN2;ELOB;HSP90AB1;RPS27A;TCP1;CCDC50;UBE2T;ACTG1;RALA;MAP1LC3B;CCT2;TRIB1;RRAGA;RNF8;RPA2;UBE2A;SCAMP3;WFS1;UBE2N;OTUB1;RTN4;ARRB2;IKBKG;DTX1;PER1;ZNF746;UBE2L3;HSP90AA1;HSPA8;SLC25A5;HSPBP1;NEK6;CDKN1B;HSPD1;HAPSTR1;PRKACA;VCP;BAG1;BECN1;TRIB2;NFE2L2;RNF20;DNAJA1;MOAP1;TUBB2A;SYT1…	L5ET
391	WikiPathway_2023_Human__Nuclear Receptors Meta Pathway WP2882	-0.219272	-1.68652	0.00631579	0.27656	1	75/155	34.31%	SLC5A11;SCD;AHR;EPHA3;SLC7A11;GSTP1;GCLC;PDE4B;PPP1R14C;PDGFB;SLC6A1;DNER;SLC2A12;SLC39A7;PRDX1;FKBP5;BLVRB;CDC37;HSP90AB1;RGS2;FASN;SLCO2B1;TXNRD1;KEAP1;PSMC5;B3GNT5;GSR;DBI;CDC42EP3;MGST2;EPB41L4B;SMC1A;EGR1;PGD;TSC22D3;PTPA;JUND;GSTM3;HSP90AA1;ABCB1;AKAP13;SLC39A13;SLC39A3;CDKN1B;SRC;ESR1;ARL5B;TGFB2;GPAM;NFE2L2;SLC27A5;PTGES3;HSPA1A;SLC26A2;SLC19A2;SMARCA1;GSTM4;CBR3;FTL;SLC27A1;SLC39A6;SLC39…	L5ET
392	GO_Biological_Process_2023__Ribosome Biogenesis (GO:0042254)	-0.226537	-1.67161	0.00762527	0.286833	1	56/124	31.29%	PIH1D2;ZNF622;TMA16;DCAF13;RIOK1;PNO1;RPS19;WDR36;RPS11;MRPS12;RPS9;RPS15;MRTO4;RPS3A;NOP53;SURF6;RPL26;GLUL;SDAD1;CINP;EXOSC2;RPS13;RPS25;WDR18;UTP18;RRP7A;RPL14;RPS28;SBDS;RPS7;UTP15;UTP3;LTV1;RPS5;EIF2S1;WDR74;DNTTIP2;RPS6;SNU13;RPS23;UTP6;DIMT1;RPL27;RPS16;RPS14;MRPL22;RPS4X;NOP14;RPS15A;WDR3;DHX37;RPF2;DDX27;HEATR3;RPL11;RPS27	L5ET
393	GO_Cellular_Component_2023__Cilium (GO:0005929)	0.14185	1.66486	0	0.578543	1	65/171	23.75%	FLCN;FANK1;CFAP300;CCDC39;PKD1L1;TTLL3;FHDC1;PROM1;TULP3;CFAP73;ROPN1L;CATSPERG;IQUB;RAB8A;IFT140;CFAP91;NPHP3;WDR19;DLEC1;CFAP161;TCTN3;PDZD7;SHANK3;OFD1;DNAH2;ARL13B;IQCG;DNAH5;TMEM138;DNAH9;ADCY3;IFT74;CFAP69;KIF27;ARL6;TBC1D30;DNAI1;RSPH3;MKKS;DYNC2I1;KIF3B;INTU;CFAP221;GPR161;EFCAB7;FAM161A;BBIP1;TTLL5;DNAI4;ADCY5;IFT81;TTC21B;CCDC66;PKD1;GAS8;SEPTIN9;IQCB1;DAAM1;DYNC2H1;TUB;TNPO1;NME5;MOSMO…	L5ET
394	KEGG_2021_Human__PI3K-Akt signaling pathway	-0.205419	-1.65103	0.00739958	0.308228	1	37/174	11.24%	CHRM2;RELN;COL4A5;FGFR2;ITGB8;LPAR1;ERBB4;LAMA2;HRAS;ITGA2;MET;SGK1;SGK3;CREB3L2;FGFR1;KITLG;RAC1;BCL2;IL6R;COL6A6;PDGFB;YWHAH;COL4A2;HSP90B1;GNB2;COL4A1;NR4A1;YWHAB;PHLPP1;LPAR6;CDC37;PKN1;HSP90AB1;ATF4;GNG3;EGF;SPP1	L5ET
395	WikiPathway_2023_Human__Ciliopathies WP4803	0.130805	1.49616	0	0.664418	1	102/137	54.07%	FLCN;PIK3R4;DDX59;UNC119;INPP5E;CCDC39;PKD1L1;HYDIN;IFT140;NPHP3;CFAP298;WDR19;TCTN3;OFD1;ARL13B;TMEM138;ARL6;EFHC1;DNAI1;TCTN1;RSPH3;MKKS;DYNC2I1;INTU;GPR161;KATNIP;FAM161A;SUFU;BBIP1;ODAD4;TAPT1;TTLL5;TBC1D32;IFT81;TTC21B;CPLANE1;CEP164;PKD1;GAS8;IQCB1;TTBK2;NEK1;DYNC2H1;TUB;ALMS1;AHI1;KIAA0586;BBS9;RAB28;CSPP1;WDPCP;SDCCAG8;SPATA7;NME7;DYNC2LI1;PKD2;BBS7;KIZ;PIBF1;NPHP4;USP9X;INVS;RPGRIP1L;IFT…	L5ET
396	GO_Biological_Process_2023__Plasma Membrane Bounded Cell Projection Assembly (GO:0120031)	0.101396	1.30076	0	0.766017	1	73/210	24.05%	RAB8B;AVIL;DZIP1L;WHAMM;TTLL3;FHDC1;SPEF1;FGD4;IQUB;RAB8A;IFT140;NPHP3;CENPJ;CFAP298;FBF1;TTC39C;WDR19;CFAP161;CFAP54;GOLPH3;TCTN3;CDH13;CEP250;ARFIP2;RABL2B;OFD1;MYLK;ARL13B;DMTN;DNAH5;TMEM138;FNBP1L;FGD1;CEP162;IFT74;PTPDC1;KIF27;ARL6;PCNT;CEP126;TCTN1;CARMIL1;MKKS;FGD6;ARMC9;DYNC2I1;KIF3B;INTU;CFAP221;DNMBP;CFAP43;FAM161A;BBIP1;ABLIM3;CD2AP;IFT81;TTC21B;CPLANE1;CCDC66;CEP164;MINK1;IQCB1;CCDC57…	L5ET
397	KEGG_2021_Human__Ribosome	-0.60793	-4.76754	0	0	0	115/131	31.71%	RPL41;MRPS12;RPS27A;RPL29;RPL19;RPL26;RPL10;RPL10A;RPS13;FAU;RPL7A;RPL36A-HNRNPH2;RPL8;RPL18A;RPL13A;RPS12;RPS15;RPS18;MRPL12;MRPL36;RPS4X;RPS26;RPL22L1;RPL36AL;RPS11;RPL9;RPL35;RPS16;RPS10;RPS23;RPL12;RPL35A;MRPS17;RPS14;RPL11;MRPL21;UBA52;MRPL17;RPL3;RPL27;RPL21;RPS7;RPL32;RPL18;RPS28;RPS5;MRPL28;MRPL24;RPS2;RPS3A;RPS9;MRPL20;RPL13;RPS15A;RPS27;RPS21;RPL23A;RPLP2;MRPS7;RPL27A;RPL24;RPL7;RPL38;R…	L3-5IT-1
398	GO_Biological_Process_2023__Cytoplasmic Translation (GO:0002181)	-0.64348	-4.57055	0	0	0	75/92	22.98%	RPL41;MRPS12;RPS27A;RPL29;RPL19;RPL26;RPL10;RPL10A;RPS13;FAU;RPL7A;RPL8;RPL18A;RPL13A;RPS15;RPS18;RPS4X;RPS26;RPL22L1;RPL36AL;RPS11;RPL9;RPL35;RPS16;RPS10;RPS23;RPL12;RPL35A;RPS14;RPL11;UBA52;RPL3;RPL27;RPL21;RPS7;RPL32;RPL18;RPS28;RPS5;RPS2;RPS3A;RPS9;RPL13;RPS15A;RPS27;RPS21;RPL23A;RPLP2;RPL27A;RPL24;RPL7;RPL38;RPL6;RPL36;RPL28;RPLP1;RPS25;RPS19;EIF4A1;RPS8;RPS17;RPL39;RPL15;RPLP0;RPL26L1;RPS6;…	L3-5IT-1
399	WikiPathway_2023_Human__Cytoplasmic Ribosomal Proteins WP477	-0.629186	-4.45935	0	0	0	75/88	26.62%	RPL41;RPS27A;RPL29;RPL19;RPL26;RPL10;RPL10A;RPS13;FAU;RPL7A;RPL8;RPL18A;RPL13A;RPS12;RPS15;RPS18;RPS4X;RPS26;RPS11;RPL9;RPL35;RPS16;RPS10;RPS23;RPL12;RPL35A;RPS14;RPL11;UBA52;RPL3;RPL27;RPL21;RPS7;RPL32;RPL18;RPS28;RPS5;RPS2;RPS3A;RPS9;RPL13;RPS15A;RPS27;RPS21;RPL23A;RPLP2;RPL27A;RPL24;RPL7;RPL38;RPL23;RPL6;RPL36;RPL28;RPLP1;RPS25;RPS19;RPS8;RPS17;RPL39;RPL15;RPLP0;RPS6;RPL34;RPL14;RPS4Y1;RPL5;RP…	L3-5IT-1
400	GO_Biological_Process_2023__Peptide Biosynthetic Process (GO:0043043)	-0.536051	-4.29723	0	0	0	114/146	31.23%	RPL41;MRPS12;RPS27A;RPL29;MRPL51;RPL19;RPL26;RPL10;RPL10A;RPS13;FAU;RPL7A;RPL8;RPL18A;RPL13A;RPS15;RPS18;MRPL12;MRPL36;CARNS1;RPS4X;RPS26;MRPL55;RPL36AL;RPS11;RPL9;RPL35;RPS16;RPS10;RPS23;RPL12;RPL35A;MRPS17;RPS14;RPL11;RPL3;RPL27;RPL21;RPS7;RPL32;RPL18;RPS28;RPS5;MRPL28;MRPL24;RPS2;RPS3A;RPS9;RPL13;RPS15A;RPS27;RPS21;RPL23A;DHPS;RPLP2;MRPS7;GSPT2;RPL27A;RPL24;RPL7;RPL38;RPL6;RPL36;RPL28;RPLP1;PC…	L3-5IT-1
401	GO_Biological_Process_2023__Macromolecule Biosynthetic Process (GO:0009059)	-0.500426	-4.22657	0	0	0	128/174	31.23%	TERT;INHBA;RPL41;MRPS12;RPS27A;RPL29;EEF1B2;MRPL51;RPL19;EIF5A;RPL26;RPL10;RPL10A;RPS13;FAU;RPL7A;RPL8;RPL18A;RPL13A;RPS15;RPS18;MRPL12;MRPL36;RPS4X;RPS26;MRPL55;TYMS;RPL36AL;RPS11;RPL9;RPL35;RPS16;RPS10;RPS23;RPL12;RPL35A;MRPS17;RPS14;RPL11;RPL3;RPL27;RPL21;RPS7;RPL32;RPL18;RPS28;RPS5;MRPL28;MRPL24;RPS2;RPS3A;RPS9;RPL13;RPS15A;RPS27;RPS21;RPL23A;DHPS;RPLP2;MRPS7;GSPT2;RPL27A;RPL24;RPL7;RPL38;RPL…	L3-5IT-1
402	GO_Biological_Process_2023__Translation (GO:0006412)	-0.477086	-4.22381	0	0	0	154/226	31.23%	NDUFA7;RPL41;MRPL53;MRPS28;MRPS12;MRPL54;RPS27A;RPL29;EEF1B2;MRPL51;RPL19;EIF5A;RPL26;RPL10;RPL10A;RPS13;FAU;RPL7A;RPL8;RPL18A;RPL13A;RPS15;RPS18;AURKAIP1;MRPL12;MRPL36;RPS4X;RPS26;MRPL55;RPL22L1;RPL36AL;RPS11;RPL9;RPL35;RPS16;RPS10;RPS23;GADD45GIP1;RPL12;RPL35A;MRPS17;RPS14;RPL11;MRPL21;UBA52;MRPL17;MRPL40;RPL3;RPL27;RPL21;RPS7;RPL32;MRPS34;RPL18;RPS28;RPS5;MRPL28;MRPL24;RPS2;RPS3A;RPS9;MRPL20;R…	L3-5IT-1
403	WikiPathway_2023_Human__Electron Transport Chain OXPHOS System In Mitochondria WP111	-0.569391	-4.03689	0	0	0	69/89	29.84%	COX8A;COX7A1;COX6A1;ATP5MF;NDUFA7;UCP1;NDUFA4;COX5B;ATP5F1E;ATP5MC1;SLC25A5;ATP5F1D;ATP5MC3;UQCR11;NDUFA13;NDUFA6;UQCRQ;NDUFB8;NDUFA11;NDUFB10;COX7C;ATP5PF;COX7B;UQCR10;NDUFA2;UQCRFS1;ATP5ME;NDUFA1;COX4I1;NDUFB7;COX6B1;ATP5PO;NDUFA3;NDUFAB1;NDUFC2;COX7A2;NDUFB9;ATP5IF1;NDUFB2;UQCRB;NDUFS5;NDUFB3;COX5A;NDUFA8;NDUFS3;NDUFB5;NDUFS7;SLC25A4;SURF1;ATP5PD;SDHD;UQCRH;UQCRC1;NDUFA12;COX6C;NDUFS6;ATP5F1B;…	L3-5IT-1
404	GO_Cellular_Component_2023__Large Ribosomal Subunit (GO:0015934)	-0.648815	-3.92358	0	0	0	43/49	25.67%	RPL41;RPL29;RPL19;RPL26;RPL10A;RPL7A;RPL8;RPL18A;RPL13A;RPL36AL;RPL9;RPL35;RPL12;RPL35A;RPL11;UBA52;RPL3;RPL27;RPL21;RPL32;RPL18;RPL13;RPL23A;RPLP2;RPL27A;RPL24;RPL7;RPL38;RPL6;RPL36;RPL28;RPLP1;RPL39;RPL15;RPLP0;RPL26L1;RPL34;RPL14;RPL39L;RPL5;RPL4;RPL31;RPL30	L3-5IT-1
405	GO_Cellular_Component_2023__Cytosolic Large Ribosomal Subunit (GO:0022625)	-0.648815	-3.92358	0	0	0	43/49	25.67%	RPL41;RPL29;RPL19;RPL26;RPL10A;RPL7A;RPL8;RPL18A;RPL13A;RPL36AL;RPL9;RPL35;RPL12;RPL35A;RPL11;UBA52;RPL3;RPL27;RPL21;RPL32;RPL18;RPL13;RPL23A;RPLP2;RPL27A;RPL24;RPL7;RPL38;RPL6;RPL36;RPL28;RPLP1;RPL39;RPL15;RPLP0;RPL26L1;RPL34;RPL14;RPL39L;RPL5;RPL4;RPL31;RPL30	L3-5IT-1
406	KEGG_2021_Human__Oxidative phosphorylation	-0.511689	-3.87936	0	0	0	78/110	29.84%	COX8A;COX7A1;COX6A1;ATP5MF;NDUFA7;NDUFA4;COX5B;ATP5F1E;ATP5MC1;ATP12A;NDUFB11;ATP5F1D;ATP5MC3;UQCR11;NDUFA13;NDUFA6;UQCRQ;NDUFB8;NDUFA11;CYC1;NDUFB10;COX7C;ATP6V1F;ATP5PF;COX7B;UQCR10;NDUFA2;UQCRFS1;ATP5ME;NDUFA1;COX4I1;NDUFB7;COX6B1;ATP5PO;NDUFA3;NDUFAB1;NDUFC2;COX7A2;ATP6V0B;NDUFB9;NDUFB2;UQCRB;NDUFS5;NDUFB3;COX5A;NDUFA8;ATP6V1C2;NDUFA4L2;UQCRHL;NDUFS3;ATP6V1G2;NDUFB5;NDUFS7;ATP6AP1;ATP5PD;SDHD…	L3-5IT-1
407	GO_Biological_Process_2023__Aerobic Electron Transport Chain (GO:0019646)	-0.597122	-3.87657	0	0	0	52/64	29.84%	COX8A;COX6A1;NDUFA7;NDUFA4;COX5B;UQCR11;NDUFA6;UQCRQ;NDUFB8;CYC1;NDUFB10;COX7C;COX7B;UQCR10;NDUFA2;UQCRFS1;NDUFA1;COX4I1;NDUFB7;COX6B1;UQCC3;NDUFA3;NDUFAB1;NDUFC2;COX7A2;NDUFB9;NDUFB2;CYCS;UQCRB;NDUFS5;NDUFB3;COX5A;NDUFA8;UQCRHL;NDUFS3;NDUFB5;NDUFS7;SDHD;UQCRH;UQCRC1;SDHAF2;COX6C;NDUFS6;NDUFV2;NDUFS8;NDUFB4;NDUFC1;SLC25A51;NDUFS2;NDUFV1;NDUFA9;SDHA	L3-5IT-1
408	GO_Biological_Process_2023__Mitochondrial ATP Synthesis Coupled Electron Transport (GO:0042775)	-0.578168	-3.80939	0	0	0	48/66	24.71%	COX8A;COX6A1;NDUFA7;NDUFA4;COX5B;UQCR11;NDUFA6;UQCRQ;NDUFB8;CYC1;NDUFB10;COX7C;COX7B;UQCR10;NDUFA2;UQCRFS1;NDUFA1;COX4I1;NDUFB7;COX6B1;UQCC3;NDUFA3;NDUFAB1;NDUFC2;COX7A2;NDUFB9;NDUFB2;CYCS;UQCRB;NDUFS5;NDUFB3;COX5A;NDUFA8;UQCRHL;NDUFS3;NDUFB5;NDUFS7;SDHD;UQCRH;UQCRC1;SDHAF2;NDUFA12;COX6C;NDUFS6;NDUFV2;NDUFS8;NDUFB4;NDUFC1	L3-5IT-1
409	GO_Cellular_Component_2023__Small Ribosomal Subunit (GO:0015935)	-0.685768	-3.79309	0	0	0	33/38	22.44%	MRPS12;RPS27A;RPS13;FAU;RPS15;RPS18;RPS4X;RPS26;RPS11;RPS16;RPS10;RPS23;RPS14;UBA52;RPS7;RPS28;RPS5;RPS2;RPS3A;RPS9;RPS15A;RPS27;RPS21;RPS25;RPS19;RPS8;RPS17;RPS6;RACK1;RPS4Y1;RPSA;RPS24;MRPS6	L3-5IT-1
410	GO_Cellular_Component_2023__Cytosolic Small Ribosomal Subunit (GO:0022627)	-0.68808	-3.76369	0	0	0	32/37	21.99%	MRPS12;RPS27A;RPS13;FAU;RPS15;RPS18;RPS4X;RPS26;RPS11;RPS16;RPS10;RPS23;RPS14;UBA52;RPS7;RPS28;RPS5;RPS2;RPS3A;RPS9;RPS15A;RPS27;RPS21;RPS25;RPS19;RPS8;RPS17;RPS6;RACK1;RPS4Y1;RPSA;RPS24	L3-5IT-1
411	GO_Biological_Process_2023__Cellular Respiration (GO:0045333)	-0.521497	-3.7128	0	0	0	54/83	24.71%	COX8A;COX6A1;NDUFA7;NDUFA4;COX5B;NDUFB11;UQCR11;NDUFA13;NDUFA6;UQCRQ;NDUFB8;BLOC1S1;NDUFA11;CYC1;NDUFB10;COX7C;COX7B;UQCR10;NDUFA2;UQCRFS1;NDUFA1;COX4I1;NR4A3;NDUFB7;COX6B1;NDUFA3;NDUFAB1;NDUFC2;COX7A2;NDUFB9;ETFB;NDUFB2;CYCS;UQCRB;NDUFS5;NDUFB3;COX5A;NDUFA8;NDUFS3;MTLN;NDUFB5;NDUFS7;SURF1;UQCRH;UQCRC1;NDUFA12;COX6C;NDUFS6;NDUFV2;NDUFS8;CHCHD5;MDH2;NDUFB4;NDUFC1	L3-5IT-1
412	GO_Cellular_Component_2023__Ribosome (GO:0005840)	-0.588395	-3.68658	0	0	0	38/58	17.90%	RPL41;MRPS12;RPL19;RPL10A;RPS13;RPL7A;RPL8;RPL18A;RPL13A;RPS18;RPS4X;RPS26;RPL36AL;RPS11;RPL9;RPS10;RPS23;RPL11;RPL27;RPS7;RPL32;RPL18;RPS28;RPS5;RPS9;RPS27;RPS21;MRPS7;RPL24;RPL38;RPL6;RPL36;RPS25;RPS19;RPS17;RPL39;RPL15;BTF3	L3-5IT-1
413	WikiPathway_2023_Human__Oxidative Phosphorylation WP623	-0.59444	-3.62984	0	0	0	46/51	35.84%	ATP5MF;NDUFA7;NDUFA4;ATP5F1E;ATP5MC1;ATP5F1D;ATP5MC3;NDUFA6;NDUFB8;NDUFA11;NDUFB10;ATP5PF;NDUFA2;ATP5ME;NDUFB7;ATP5PO;NDUFA3;NDUFAB1;NDUFC2;NDUFB9;NDUFB2;NDUFS5;NDUFA8;NDUFA4L2;NDUFS3;NDUFB5;NDUFS7;ATP6AP1;ATP5PD;NDUFS6;ATP5F1B;NDUFV2;NDUFS8;NDUFB4;ATP5MG;NDUFC1;ATP6AP2;NDUFS2;NDUFV1;ATP5F1A;NDUFA9;ATP5PB;NDUFB1;NDUFA5;ATP5MC2;NDUFB6	L3-5IT-1
414	KEGG_2021_Human__Coronavirus disease	-0.427788	-3.6246	0	0	0	105/183	22.85%	STING1;SYK;TLR7;C1QC;C3AR1;C3;RPL41;MASP1;RPS27A;TNFRSF1A;RPL29;C1R;CASP1;RPL19;RPL26;RPL10;RPL10A;RPS13;C7;FAU;EGFR;RPL7A;RPL36A-HNRNPH2;RPL8;RPL18A;CYBB;RPL13A;RPS12;RPS15;RPS18;SELP;RPS4X;RPS26;OAS1;FOS;C1QB;RPL22L1;RPL36AL;RPS11;RPL9;RPL35;RPS16;RPS10;RPS23;RPL12;RPL35A;RPS14;RPL11;UBA52;RPL3;RPL27;RPL21;RPS7;C1QA;RPL32;RPL18;RPS28;RPS5;RPS2;RPS3A;RPS9;RPL13;PIK3R3;RPS15A;RPS27;RPS21;RPL23A;I…	L3-5IT-1
415	GO_Biological_Process_2023__Oxidative Phosphorylation (GO:0006119)	-0.565858	-3.58095	0	0	0	46/60	29.84%	ATP5MF;NDUFA7;ATP5F1E;NDUFB11;ATP5F1D;NDUFA13;NDUFA6;NDUFB8;NDUFA11;NDUFB10;CHCHD10;ATP5PF;NDUFA2;ATP5ME;NDUFA1;NDUFB7;ATP5PO;NDUFA3;NDUFAB1;NDUFC2;NDUFB9;NDUFB2;UQCRB;NDUFS5;NDUFB3;NDUFA8;NDUFS3;NDUFB5;NDUFS7;ATP5PD;SDHD;UQCRH;UQCRC1;NDUFA12;NDUFS6;ATP5F1B;NDUFV2;NDUFS8;NDUFB4;ATP5MG;NDUFC1;SLC25A51;NDUFS2;NDUFV1;NDUFA9;SDHA	L3-5IT-1
416	GO_Molecular_Function_2023__Oxidoreduction-Driven Active Transmembrane Transporter Activity (GO:0015453)	-0.59432	-3.57577	0	0	0	43/52	29.21%	COX8A;COX7A1;NDUFA7;NDUFA4;COX5B;NDUFA6;NDUFB8;NDUFB10;COX7C;COX7B;UQCR10;NDUFA2;NDUFA1;COX4I1;NDUFB7;COX6B1;NDUFA3;NDUFC2;NDUFB9;NDUFB2;UQCRB;NDUFS5;NDUFB3;COX5A;NDUFA8;UQCRHL;CYB561D2;NDUFS3;NDUFB5;NDUFS7;UQCRH;UQCRC1;NDUFA12;NDUFS6;CYB561A3;NDUFV2;NDUFS8;NDUFB4;NDUFC1;NDUFS2;NDUFV1;COX7A2L;NDUFA9	L3-5IT-1
417	GO_Biological_Process_2023__Proton Motive Force-Driven ATP Synthesis (GO:0015986)	-0.563221	-3.55456	0	0	0	51/59	35.84%	ATP5MF;NDUFA7;ATP5F1E;ATP5MC1;NDUFB11;ATP5F1D;ATP5MC3;NDUFA13;NDUFA6;NDUFB8;NDUFA11;NDUFB10;ATP5PF;NDUFA2;ATP5ME;NDUFA1;NDUFB7;ATP5PO;NDUFA3;NDUFAB1;NDUFC2;ATP5MJ;NDUFB9;NDUFB2;NDUFS5;NDUFB3;NDUFA8;NDUFS3;ATP5MK;NDUFB5;NDUFS7;ATP5PD;SDHD;NDUFA12;NDUFS6;ATP5F1B;NDUFV2;NDUFS8;NDUFB4;ATP5MG;NDUFC1;NDUFS2;NDUFV1;NDUFA9;SDHA;ATP5PB;VPS9D1;NDUFB1;NDUFA5;ATP5MC2;NDUFB6	L3-5IT-1
418	GO_Biological_Process_2023__Proton Motive Force-Driven Mitochondrial ATP Synthesis (GO:0042776)	-0.576434	-3.53748	0	0	0	41/52	29.84%	ATP5MF;NDUFA7;ATP5F1E;NDUFB11;ATP5F1D;NDUFA13;NDUFA6;NDUFB8;NDUFA11;NDUFB10;ATP5PF;NDUFA2;ATP5ME;NDUFA1;NDUFB7;ATP5PO;NDUFA3;NDUFAB1;NDUFC2;NDUFB9;NDUFB2;NDUFS5;NDUFB3;NDUFA8;NDUFS3;NDUFB5;NDUFS7;ATP5PD;SDHD;NDUFA12;NDUFS6;ATP5F1B;NDUFV2;NDUFS8;NDUFB4;ATP5MG;NDUFC1;NDUFS2;NDUFV1;NDUFA9;SDHA	L3-5IT-1
419	GO_Cellular_Component_2023__Mitochondrial Inner Membrane (GO:0005743)	-0.358714	-3.52629	0	0	0	214/350	35.86%	COX8A;COX6A1;ATP5MF;NDUFA7;CYP24A1;UCP1;NDUFAF3;MICOS13;NDUFA4;COX5B;ATP5F1E;ATP5MC1;SLC25A5;NDUFB11;ATP5F1D;MRPL53;MRPS28;MRPS12;ATP5MC3;MRPL54;UQCR11;NDUFA13;NDUFA6;UQCRQ;NDUFB8;MRPL51;MPV17L2;NDUFA11;CYC1;NDUFB10;COA3;COX7C;ENDOG;ATP5PF;COX7B;UQCR10;LDHB;AURKAIP1;MRPL12;NDUFA2;MRPL36;UQCRFS1;ATP5ME;TMEM160;MRPL55;SCO2;CCDC51;NDUFA1;COX4I1;NDUFB7;TYMS;COX6B1;UQCC3;TIMM13;ATP5PO;NDUFA3;NDUFAB1;M…	L3-5IT-1
420	GO_Biological_Process_2023__Mitochondrial Respiratory Chain Complex Assembly (GO:0033108)	-0.469681	-3.38223	0	0	0	63/87	35.84%	COX14;NDUFAF3;NDUFB11;PET117;NDUFA13;NDUFA6;NDUFB8;NDUFA11;NDUFB10;COA3;NDUFA2;UQCRFS1;SCO2;SDHAF1;NDUFA1;NDUFB7;UQCC3;NDUFA3;NDUFAB1;NDUFC2;BCS1L;NDUFB9;NDUFB2;PET100;NDUFS5;NDUFB3;NDUFA8;NDUFS3;NDUFAF8;COX16;TMEM126A;NDUFB5;NDUFS7;SURF1;SDHAF2;COX17;NDUFS8;NDUFB4;CHCHD4;CHCHD7;NDUFC1;DMAC1;NDUFAF4;DMAC2;TMEM186;NDUFS2;FASTKD3;SMIM20;TMEM126B;OMA1;NDUFA9;COA8;UQCC2;COX20;ECSIT;COA5;NDUFB1;SDHAF3…	L3-5IT-1
421	KEGG_2021_Human__Prion disease	-0.374654	-3.34147	0	0	0	128/238	27.83%	COX8A;IL1A;COX7A1;COX6A1;NDUFA7;NDUFA4;C1QC;PSMB6;COX5B;ATP5F1E;ATP5MC1;SLC25A5;NDUFB11;ATP5F1D;NOTCH1;ATP5MC3;TUBB2A;UQCR11;NDUFA13;NDUFA6;UQCRQ;NDUFB8;C7;NDUFA11;HSPA8;CYC1;NDUFB10;COX7C;CYBB;CAV1;ATP5PF;COX7B;UQCR10;NDUFA2;UQCRFS1;TUBA1A;NDUFA1;COX4I1;NDUFB7;C1QB;TUBA4A;COX6B1;ATP5PO;NDUFA3;NDUFAB1;PSMC3;NDUFC2;CACNA1F;COX7A2;NDUFB9;CACNA1S;C1QA;PSMC5;GRIN3A;DDIT3;CAV3;NDUFB2;CYCS;UQCRB;GRIN2C…	L3-5IT-1
422	GO_Cellular_Component_2023__Polysomal Ribosome (GO:0042788)	-0.6574	-3.27596	0	0	0	19/27	16.09%	RPL41;RPL19;RPL10A;RPL7A;RPL8;RPL18A;RPS26;RPL36AL;RPS23;RPL11;RPL32;RPL18;RPS28;RPS21;RPL24;RPL38;RPL6;RPL36;RPL39	L3-5IT-1
423	KEGG_2021_Human__Parkinson disease	-0.370105	-3.27318	0	0	0	122/221	29.37%	COX8A;COX7A1;COX6A1;NDUFA7;NDUFA4;PSMB6;COX5B;ATP5F1E;ATP5MC1;SLC25A5;NDUFB11;ATP5F1D;ATP5MC3;RPS27A;TUBB2A;UQCR11;NDUFA13;NDUFA6;UQCRQ;NDUFB8;GPR37;UBB;NDUFA11;CYC1;NDUFB10;COX7C;ATP5PF;COX7B;UQCR10;NDUFA2;UQCRFS1;TUBA1A;NDUFA1;COX4I1;NDUFB7;TUBA4A;COX6B1;ATP5PO;NDUFA3;NDUFAB1;PSMC3;NDUFC2;UBA52;COX7A2;NDUFB9;PSMC5;DDIT3;NDUFB2;CYCS;CALM2;SLC18A2;UQCRB;NDUFS5;NDUFB3;COX5A;NDUFA8;ADRM1;NDUFA4L2;U…	L3-5IT-1
424	GO_Cellular_Component_2023__Organelle Inner Membrane (GO:0019866)	-0.329998	-3.25462	0	0	0	233/373	39.09%	COX8A;COX6A1;ATP5MF;NDUFA7;CYP24A1;UCP1;NDUFAF3;MICOS13;NDUFA4;COX5B;ATP5F1E;ATP5MC1;SLC25A5;NDUFB11;ATP5F1D;MRPL53;MRPS28;MRPS12;ATP5MC3;MRPL54;UQCR11;NDUFA13;NDUFA6;UQCRQ;NDUFB8;MRPL51;MPV17L2;NDUFA11;CYC1;NDUFB10;COA3;COX7C;ENDOG;ATP5PF;COX7B;UQCR10;LDHB;AURKAIP1;MRPL12;NDUFA2;MRPL36;UQCRFS1;ATP5ME;TMEM160;MRPL55;SCO2;CCDC51;NDUFA1;COX4I1;NDUFB7;TYMS;COX6B1;UQCC3;TIMM13;ATP5PO;NDUFA3;IFI27;NDU…	L3-5IT-1
425	MSigDB_Hallmark_2020__Oxidative Phosphorylation	-0.378161	-3.23588	0	0	0	123/197	35.86%	COX8A;COX6A1;ATP5MF;NDUFA7;NDUFA4;ECH1;COX5B;ATP5F1E;ATP5MC1;SLC25A5;GPX4;ATP5F1D;MRPS12;ATP5MC3;UQCR11;NDUFA6;UQCRQ;NDUFB8;TIMM8B;HSD17B10;CYC1;COX7C;ATP6V1F;ATP5PF;COX7B;UQCR10;LDHB;NDUFA2;UQCRFS1;ATP5ME;NDUFA1;COX4I1;NDUFB7;TOMM22;COX6B1;TIMM13;ATP5PO;NDUFA3;NDUFAB1;TIMM10;NDUFC2;COX7A2;ATP6V0B;ETFB;NDUFB2;CYCS;LDHA;UQCRB;NDUFB3;COX5A;NDUFA8;ACAA2;MRPL34;NDUFS3;HTRA2;SLC25A11;IDH3G;NDUFB5;NDUF…	L3-5IT-1
426	WikiPathway_2023_Human__Mitochondrial Complex I Assembly Model OXPHOS System WP4324	-0.522841	-3.16223	0	0	0	39/50	35.84%	NDUFA7;NDUFAF3;NDUFB11;NDUFA13;NDUFA6;NDUFB8;NDUFB10;NDUFA2;NDUFA1;NDUFB7;NDUFA3;NDUFAB1;NDUFC2;NDUFB9;NDUFB2;NDUFS5;NDUFB3;NDUFA8;NDUFS3;NDUFB5;NDUFA12;NDUFS6;NDUFV2;NDUFB4;NDUFC1;TMEM70;DMAC1;NDUFAF4;DMAC2;TMEM186;NDUFS2;NDUFV1;TMEM126B;ECSIT;NDUFB1;NDUFA5;FOXRED1;NDUFAF1;NDUFB6	L3-5IT-1
427	MSigDB_Hallmark_2020__Myc Targets V1	-0.359165	-3.13192	0	0	0	145/198	44.28%	MCM5;HSPE1;EEF1B2;CDC20;MYC;CYC1;NHP2;NME1;TYMS;H2AZ1;NDUFAB1;PPIA;RPS10;SNRPD2;RPL18;LDHA;RPS5;RPS2;C1QBP;COX5A;RPL6;FBL;PSMD8;MRPL23;NOP16;LSM7;EIF4A1;PRDX4;RAN;SET;RPLP0;MCM7;RPS6;MAD2L1;PSMB3;CCT7;RANBP1;TUFM;RACK1;RPL34;HSP90AB1;RPL14;PSMA7;POLD2;PHB2;RRP9;CCT5;TCP1;PA2G4;PCNA;CCT2;POLE3;MRPL9;SRM;CDK4;EIF4G2;PCBP1;SRSF2;SNRPA;MCM4;LSM2;AIMP2;KPNA2;VBP1;TRIM28;SNRPB2;PSMA4;PSMC4;APEX1;HNRNPA…	L3-5IT-1
428	GO_Cellular_Component_2023__Mitochondrial Respiratory Chain Complex I (GO:0005747)	-0.546658	-3.125	0	0	0	35/41	35.84%	NDUFA7;NDUFA4;NDUFB11;NDUFA13;NDUFA6;NDUFB8;NDUFA11;NDUFB10;NDUFA2;NDUFA1;NDUFB7;NDUFA3;NDUFAB1;NDUFC2;NDUFB9;NDUFB2;NDUFS5;NDUFB3;NDUFA8;NDUFS3;NDUFB5;NDUFS7;NDUFA12;NDUFS6;NDUFV2;NDUFS8;NDUFB4;NDUFC1;NDUFS2;NDUFV1;NDUFA9;NDUFB1;NDUFA5;NDUFAF1;NDUFB6	L3-5IT-1
429	GO_Cellular_Component_2023__Respiratory Chain Complex I (GO:0045271)	-0.546658	-3.125	0	0	0	35/41	35.84%	NDUFA7;NDUFA4;NDUFB11;NDUFA13;NDUFA6;NDUFB8;NDUFA11;NDUFB10;NDUFA2;NDUFA1;NDUFB7;NDUFA3;NDUFAB1;NDUFC2;NDUFB9;NDUFB2;NDUFS5;NDUFB3;NDUFA8;NDUFS3;NDUFB5;NDUFS7;NDUFA12;NDUFS6;NDUFV2;NDUFS8;NDUFB4;NDUFC1;NDUFS2;NDUFV1;NDUFA9;NDUFB1;NDUFA5;NDUFAF1;NDUFB6	L3-5IT-1
430	GO_Biological_Process_2023__Aerobic Respiration (GO:0009060)	-0.497649	-3.11543	0	0	0	38/58	27.36%	NDUFA7;NDUFB11;ATP5F1D;NDUFA13;NDUFA6;NDUFB8;BLOC1S1;NDUFA11;NDUFB10;CHCHD10;NDUFA2;NDUFA1;NDUFB7;NDUFA3;NDUFAB1;NDUFC2;NDUFB9;NDUFB2;UQCRB;NDUFS5;NDUFB3;NDUFA8;NDUFS3;NDUFB5;NDUFS7;SURF1;UQCRH;UQCRC1;NDUFA12;NDUFS6;NDUFV2;NDUFS8;MDH2;NDUFB4;NDUFC1;SLC25A51;NDUFS2;NDUFV1	L3-5IT-1
431	GO_Biological_Process_2023__Mitochondrial Electron Transport, NADH To Ubiquinone (GO:0006120)	-0.586153	-3.11514	0	0	0	30/34	35.84%	NDUFA7;NDUFA4;NDUFA6;NDUFB8;NDUFB10;NDUFA2;NDUFB7;NDUFA3;NDUFAB1;NDUFC2;NDUFB9;NDUFB2;NDUFS5;NDUFB3;NDUFA8;NDUFS3;NDUFB5;NDUFS7;NDUFS6;NDUFV2;NDUFS8;NDUFB4;NDUFC1;NDUFS2;NDUFV1;NDUFA9;NDUFB1;NDUFA5;NDUFAF1;NDUFB6	L3-5IT-1
432	GO_Molecular_Function_2023__NADH Dehydrogenase (Quinone) Activity (GO:0050136)	-0.586234	-3.09661	0	0	0	27/34	29.21%	NDUFA7;NDUFA4;NDUFA6;NDUFB8;NDUFB10;NDUFA2;NDUFB7;NDUFA3;NDUFC2;NDUFB9;NDUFB2;NDUFS5;NDUFB3;NDUFA8;NDUFS3;NDUFB5;NDUFS7;NDUFA12;NDUFS6;NDUFV2;NDUFS8;NDUFB4;NDUFC1;NQO1;NDUFS2;NDUFV1;NDUFA9	L3-5IT-1
433	GO_Biological_Process_2023__NADH Dehydrogenase Complex Assembly (GO:0010257)	-0.498072	-3.09538	0	0	0	40/53	35.84%	NDUFAF3;NDUFB11;NDUFA13;NDUFA6;NDUFB8;NDUFA11;NDUFB10;NDUFA2;NDUFA1;NDUFB7;NDUFA3;NDUFAB1;NDUFC2;BCS1L;NDUFB9;NDUFB2;NDUFS5;NDUFB3;NDUFA8;NDUFS3;NDUFAF8;TMEM126A;NDUFB5;NDUFS7;NDUFS8;NDUFB4;NDUFC1;DMAC1;NDUFAF4;DMAC2;TMEM186;NDUFS2;TMEM126B;NDUFA9;ECSIT;NDUFB1;NDUFA5;FOXRED1;NDUFAF1;NDUFB6	L3-5IT-1
434	GO_Biological_Process_2023__Mitochondrial Respiratory Chain Complex I Assembly (GO:0032981)	-0.498072	-3.09538	0	0	0	40/53	35.84%	NDUFAF3;NDUFB11;NDUFA13;NDUFA6;NDUFB8;NDUFA11;NDUFB10;NDUFA2;NDUFA1;NDUFB7;NDUFA3;NDUFAB1;NDUFC2;BCS1L;NDUFB9;NDUFB2;NDUFS5;NDUFB3;NDUFA8;NDUFS3;NDUFAF8;TMEM126A;NDUFB5;NDUFS7;NDUFS8;NDUFB4;NDUFC1;DMAC1;NDUFAF4;DMAC2;TMEM186;NDUFS2;TMEM126B;NDUFA9;ECSIT;NDUFB1;NDUFA5;FOXRED1;NDUFAF1;NDUFB6	L3-5IT-1
435	GO_Molecular_Function_2023__NADH Dehydrogenase (Ubiquinone) Activity (GO:0008137)	-0.584503	-3.08586	0	0	0	29/33	35.84%	NDUFA7;NDUFA4;NDUFA6;NDUFB8;NDUFB10;NDUFA2;NDUFB7;NDUFA3;NDUFC2;NDUFB9;NDUFB2;NDUFS5;NDUFB3;NDUFA8;NDUFS3;NDUFB5;NDUFS7;NDUFA12;NDUFS6;NDUFV2;NDUFS8;NDUFB4;NDUFC1;NDUFS2;NDUFV1;NDUFA9;NDUFB1;NDUFA5;NDUFB6	L3-5IT-1
436	KEGG_2021_Human__Diabetic cardiomyopathy	-0.370097	-3.0594	0	0	0	95/170	29.21%	COX8A;COL3A1;COX7A1;COX6A1;NDUFA7;NDUFA4;TGFBR2;COX5B;ATP5F1E;ATP5MC1;SLC25A5;NDUFB11;ATP5F1D;ATP5MC3;UQCR11;NDUFA13;NDUFA6;UQCRQ;NDUFB8;NDUFA11;CYC1;GAPDH;NDUFB10;COX7C;CYBB;ATP5PF;COX7B;UQCR10;NOS3;NDUFA2;UQCRFS1;NDUFA1;COX4I1;NDUFB7;COX6B1;ATP5PO;NDUFA3;NDUFAB1;NDUFC2;AGER;COX7A2;NDUFB9;REN;NDUFB2;UQCRB;PLN;NDUFS5;NDUFB3;PIK3R3;COX5A;NDUFA8;NDUFA4L2;UQCRHL;NDUFS3;CAMK2D;PLCB2;NDUFB5;NDUFS7;CTS…	L3-5IT-1
437	GO_Biological_Process_2023__rRNA Metabolic Process (GO:0016072)	-0.420171	-2.97458	0	0	0	57/86	33.70%	EXOSC4;RPL26;SLFN14;RPS15;ZFP36L1;RPS16;RPL35A;RPL11;POLR1G;RPL27;RPS7;CAVIN1;WDR18;RPS28;RPS27;RPL7;NOC4L;EMG1;FBL;RPS25;RPS19;RPS17;BYSL;RPS6;NOP53;PIH1D1;EXOSC5;RPL14;DDX47;SBDS;PIH1D2;RRP9;WDR74;TRIR;RPL5;EBNA1BP2;RPS24;NOL6;RRP7A;POP4;EXOSC3;DEDD2;LYAR;SIRT7;DDX54;DCAF13;DKC1;NOLC1;RRP36;PES1;MRTO4;NOP56;NOB1;DDX49;UTP15;SPPL2B;NIFK	L3-5IT-1
438	GO_Biological_Process_2023__Gene Expression (GO:0010467)	-0.320685	-2.95747	0	0	0	152/281	34.02%	EXOSC4;CASP10;NOX4;RPL41;MRPS12;RPS27A;RPL29;CASP1;MRPL51;RPL19;RPL26;RPL10;RPL10A;RPS13;FAU;RPL7A;RPL8;RPL18A;RPL13A;RPS15;RPS18;ADAD1;MRPL12;MRPL36;RPS4X;RPS26;MRPL55;RPL36AL;RPS11;RPL9;RPL35;RPS16;NXT2;RPS10;RPS23;RPL12;RPL35A;MRPS17;RPS14;RPL11;RPL3;RPL27;RPL21;RPS7;STUB1;THOC6;RPL32;NXT1;ANGPT2;RPL18;RPS28;RPS5;MRPL28;MRPL24;RPS2;RPS3A;RPS9;H3C1;RPL13;RPS15A;RPS27;RPS21;RPL23A;DHPS;RPLP2;MRP…	L3-5IT-1
439	WikiPathway_2023_Human__Nonalcoholic Fatty Liver Disease WP4396	-0.364416	-2.90274	0	0	0	76/136	29.84%	COX8A;IL1A;COX7A1;COX6A1;NDUFA7;NDUFA4;COX5B;NDUFB11;TNFRSF1A;UQCR11;NDUFA13;NDUFA6;UQCRQ;NDUFB8;NDUFA11;CYC1;NDUFB10;COX7C;COX7B;UQCR10;NDUFA2;UQCRFS1;NDUFA1;COX4I1;NDUFB7;COX6B1;NDUFA3;NDUFAB1;NDUFC2;COX7A2;NDUFB9;DDIT3;NDUFB2;CYCS;UQCRB;PRKAG1;NDUFS5;NDUFB3;PIK3R3;COX5A;NDUFA8;BID;NDUFA4L2;UQCRHL;BAK1;NDUFS3;CEBPA;NDUFB5;NDUFS7;PIK3R2;SDHD;FAS;ATF4;UQCRH;UQCRC1;NDUFA12;COX6C;JUN;NDUFS6;BAX;CAS…	L3-5IT-1
440	KEGG_2021_Human__Non-alcoholic fatty liver disease	-0.361497	-2.88965	0	0	0	77/139	29.84%	COX8A;IL1A;COX7A1;COX6A1;NDUFA7;NDUFA4;COX5B;NDUFB11;TNFRSF1A;UQCR11;NDUFA13;NDUFA6;UQCRQ;NDUFB8;NDUFA11;CYC1;NDUFB10;COX7C;COX7B;UQCR10;NDUFA2;UQCRFS1;NDUFA1;COX4I1;NDUFB7;FOS;COX6B1;NDUFA3;NDUFAB1;NDUFC2;COX7A2;NDUFB9;DDIT3;NDUFB2;CYCS;UQCRB;PRKAG1;NDUFS5;NDUFB3;PIK3R3;COX5A;NDUFA8;BID;NDUFA4L2;UQCRHL;NDUFS3;CEBPA;NDUFB5;NDUFS7;PIK3R2;SDHD;FAS;ATF4;UQCRH;UQCRC1;NDUFA12;COX6C;JUN;NDUFS6;BAX;CASP…	L3-5IT-1
441	GO_Cellular_Component_2023__Respiratory Chain Complex IV (GO:0045277)	-0.726182	-2.88242	0	0	0	12/15	14.03%	COX8A;COX6A1;NDUFA4;COX5B;COX7C;COX7B;UQCRFS1;COX4I1;COX6B1;COX7A2;COX5A;NDUFA4L2	L3-5IT-1
442	GO_Biological_Process_2023__Mitochondrial Translation (GO:0032543)	-0.391009	-2.85108	0	2.49737e-05	0.001	65/98	38.18%	NDUFA7;MRPL53;MRPS28;MRPS12;MRPL54;MRPL51;MRPL12;MRPL36;MRPL55;GADD45GIP1;MRPS17;MRPL21;MRPL17;MRPL40;MRPS34;MRPL28;MRPL24;MRPL20;MRPS7;CHCHD1;MRPL34;MRPL23;MRPL57;MRPL43;MRPL2;MRPS2;TUFM;MRPL47;MRPL11;MRPL58;MRPS33;MRPS26;MRPL27;MRPL41;MRPS6;MRPL52;MRPL49;MRPL4;MRPL9;MRPL14;MTG1;MRPL16;MRPL35;MRPS15;MRPS11;MRPS18A;MRPL44;MRPS18B;MRPL50;MRPL18;MRPS10;MRPS18C;MRPL10;MRPS21;MRPL30;MRPS22;MRPS14;MRP…	L3-5IT-1
443	GO_Biological_Process_2023__Mitochondrial Gene Expression (GO:0140053)	-0.385079	-2.83153	0	2.44423e-05	0.001	61/103	32.71%	NDUFA7;MRPL53;MRPS28;MRPS12;MRPL54;MRPL51;MRPL12;MRPL36;MRPL55;GADD45GIP1;MRPS17;MRPL21;MRPL17;MRPL40;MRPS34;MRPL28;MRPL24;MRPL20;MRPS7;TWNK;CHCHD1;MRPL34;MRPL23;MRPL57;MRPL43;MRPL2;MRPS2;MRPL47;MRPL11;MRPL58;MRPS33;MRPS26;TBRG4;MRPL27;MRPL41;MRPS6;MRPL52;MRPL49;MRPL4;MRPL9;MRPL14;MTG1;MRPL16;FASTKD5;MRPL35;MRPS15;MRPS11;MRPS18A;FASTK;FASTKD3;MRPL44;MRPS18B;MRPL50;MRPL18;MRPS10;MRPS18C;MRPL10;MRP…	L3-5IT-1
444	GO_Molecular_Function_2023__Olfactory Receptor Activity (GO:0004984)	0.432029	2.80321	0	0.00165082	0.002	33/56	16.17%	OR56B2P;OR2V2;OR2AT4;OR1D2;OR2T6;OR2B11;OR7C1;OR1A1;OR56A4;OR2T8;OR10H1;OR2G6;OR10H5;OR2T33;OR2T7;OR2T2;OR10AC1;OR2T11;OR8D4;OR7D2;OR2AK2;OR2T10;OR56A1;OR1B1;OR2L8;OR2AJ1;OR3A2;OR1F1;OR2L13;OR2M2;OR13A1;OR2M3;OR1L8	L3-5IT-1
445	GO_Molecular_Function_2023__Neuropeptide Activity (GO:0160041)	-0.630715	-2.79028	0	4.68894e-05	0.002	13/19	10.11%	NPY;GAL;CRH;PENK;AVP;CORT;VIP;GRP;PNOC;NPPA;CCK;SPX;NMB	L3-5IT-1
446	GO_Molecular_Function_2023__Neuropeptide Hormone Activity (GO:0005184)	-0.630715	-2.79028	0	4.68894e-05	0.002	13/19	10.11%	NPY;GAL;CRH;PENK;AVP;CORT;VIP;GRP;PNOC;NPPA;CCK;SPX;NMB	L3-5IT-1
447	KEGG_2021_Human__Huntington disease	-0.30347	-2.78785	0	4.59516e-05	0.002	159/280	36.37%	COX8A;COX7A1;COX6A1;NDUFA7;POLR2L;UCP1;NDUFA4;PSMB6;COX5B;ATP5F1E;ATP5MC1;SLC25A5;NDUFB11;ATP5F1D;ATP5MC3;TUBB2A;UQCR11;NDUFA13;NDUFA6;UQCRQ;NDUFB8;DNAI2;NDUFA11;CYC1;NDUFB10;POLR2I;BDNF;POLR2K;COX7C;ATP5PF;COX7B;UQCR10;NDUFA2;UQCRFS1;TUBA1A;NDUFA1;COX4I1;NDUFB7;GPX2;TUBA4A;COX6B1;ATP5PO;NDUFA3;NDUFAB1;PSMC3;NDUFC2;COX7A2;DCTN3;POLR2J2;NDUFB9;PSMC5;POLR2J;NDUFB2;CYCS;UQCRB;TBPL2;HIP1;NDUFS5;NDUFB…	L3-5IT-1
448	WikiPathway_2023_Human__Mitochondrial Complex IV Assembly WP4922	-0.533337	-2.78559	0	4.50506e-05	0.002	20/31	22.88%	COX8A;COX14;COX6A1;NDUFA4;COX5B;PET117;TACO1;COA3;COX7C;COX7B;COX4I1;COX6B1;COX7A2;PET100;COX5A;COX16;HIGD1A;SURF1;COX6C;COX17	L3-5IT-1
449	GO_Molecular_Function_2023__rRNA Binding (GO:0019843)	-0.471224	-2.77319	0	4.41842e-05	0.002	31/45	30.60%	TST;RPS13;DDX28;RPL12;RRS1;RPS14;RPL11;CAVIN1;RPS5;RPS9;MRPS7;EMG1;RPLP0;CIRBP;NOP53;NGRN;MRPL11;SBDS;ERAL1;RPL5;RBM34;MRPS6;MRPL16;FASTKD5;MRPS11;MRPS18A;PPAN;RPS3;RPL17;MRPL18;MRPS18C	L3-5IT-1
450	GO_Molecular_Function_2023__Hormone Activity (GO:0005179)	-0.493936	-2.73809	0	4.33506e-05	0.002	26/41	19.11%	SST;NPY;GAL;CRH;PENK;AVP;CORT;VIP;VGF;POMC;INHBA;GRP;PNOC;IGF1;ERFE;NPPA;CCK;SPX;EDN3;PTHLH;NMB;GHRL;KNG1;INSL6;CHGB;EDN1	L3-5IT-1
451	KEGG_2021_Human__Thermogenesis	-0.310164	-2.7119	0	6.38217e-05	0.003	118/208	36.04%	COX8A;COX7A1;COX14;COX6A1;ATP5MF;NDUFA7;UCP1;NDUFAF3;NDUFA4;COX5B;ATP5F1E;ATP5MC1;NDUFB11;ATP5F1D;PRKG2;ATP5MC3;UQCR11;NDUFA13;NDUFA6;UQCRQ;NDUFB8;NDUFA11;ACSL5;CYC1;CNR1;NDUFB10;COA3;COX7C;ATP5PF;COX7B;UQCR10;NDUFA2;UQCRFS1;ATP5ME;NPPA;NDUFA1;COX4I1;NDUFB7;COX6B1;ATP5PO;NDUFA3;NDUFAB1;NDUFC2;COX7A2;NDUFB9;NDUFB2;UQCRB;PRKAG1;HRAS;NDUFS5;NDUFB3;ADCY8;COX5A;NDUFA8;ADCY7;NDUFA4L2;UQCRHL;NDUFS3;CREB…	L3-5IT-1
452	GO_Biological_Process_2023__Ribosome Biogenesis (GO:0042254)	-0.332809	-2.69215	0	8.35484e-05	0.004	92/150	37.52%	EXOSC4;MRPS12;RPL26;RPS13;RPS19BP1;RPS15;MRPL36;RPS4X;RPS11;RPS16;RPS23;RPL35A;RRS1;RPS14;RPL11;RPL27;RPS7;WDR18;RPS28;RPS5;RPS3A;RPS9;RPS15A;RPS27;RPL7;NOC4L;EMG1;FBL;RPS25;NOP16;RPS19;RPS8;RPS17;RSL24D1;BYSL;RPL26L1;RPS6;NOP53;PIH1D1;TBL3;EXOSC5;RPL14;DDX47;SBDS;PIH1D2;RRP9;WDR74;RPL5;EBNA1BP2;RPS24;SNU13;WDR46;NOL6;RRP7A;POP4;BOP1;EXOSC3;NIP7;SURF6;LYAR;ZNF622;DDX54;DCAF13;DKC1;RBIS;NOL7;NOLC1…	L3-5IT-1
453	KEGG_2021_Human__Pathways of neurodegeneration	-0.267499	-2.66786	0	0.000123085	0.006	192/429	29.37%	COX8A;IL1A;COX7A1;COX6A1;NDUFA7;NDUFA4;PSMB6;COX5B;ATP5F1E;ATP5MC1;NOX4;SLC25A5;NDUFB11;ATP5F1D;WNT3A;ATP5MC3;RPS27A;TUBB2A;TNFRSF1A;UQCR11;NDUFA13;NDUFA6;UQCRQ;NDUFB8;DNAI2;WNT6;GPR37;FZD7;WNT8B;UBB;HSD17B10;NDUFA11;CYC1;NDUFB10;TRPC3;BDNF;COX7C;CYBB;ATP5PF;COX7B;UQCR10;WNT5A;NDUFA2;UQCRFS1;TUBA1A;NDUFA1;COX4I1;WNT9A;NDUFB7;GPX2;TUBA4A;COX6B1;ATP5PO;NDUFA3;NDUFAB1;PSMC3;NDUFC2;GABARAPL2;AGER;UBA…	L3-5IT-1
454	GO_Biological_Process_2023__Ribonucleoprotein Complex Biogenesis (GO:0022613)	-0.350993	-2.65738	0	0.00014108	0.007	80/116	41.05%	MRPS12;RPL26;RPS13;RPS19BP1;RPS15;MRPL36;RPS4X;RPS11;RPS16;RPS23;RPL35A;RRS1;RPS14;RPL11;RPS7;RPS28;RPS5;RPS3A;RPS9;RPS15A;RPS27;RPL7;RPL38;EMG1;FBL;RPS25;NOP16;RPS19;RPS8;RPS17;RSL24D1;BYSL;RPL26L1;RPS6;TBL3;RPL14;RRP9;WDR74;RPL5;EBNA1BP2;RPS24;SNU13;WDR46;NOL6;RRP7A;BOP1;NIP7;SURF6;ZNF622;RBIS;NOL7;UTP11;ZNF658;UTP3;RRP36;URB2;RIOK2;PES1;MRTO4;NOP56;UTP15;SPPL2B;DNTTIP2;PAK1IP1;NPM1;SPATA5L1;NO…	L3-5IT-1
455	KEGG_2021_Human__Alzheimer disease	-0.278053	-2.64774	0	0.000158454	0.008	151/331	29.25%	COX8A;IL1A;COX7A1;COX6A1;NDUFA7;NDUFA4;PSENEN;PSMB6;COX5B;ATP5F1E;ATP5MC1;NOX4;SLC25A5;NDUFB11;ATP5F1D;WNT3A;ATP5MC3;TUBB2A;TNFRSF1A;UQCR11;NDUFA13;NDUFA6;UQCRQ;NDUFB8;WNT6;FZD7;WNT8B;HSD17B10;NDUFA11;CYC1;GAPDH;NDUFB10;COX7C;CYBB;ATP5PF;COX7B;UQCR10;WNT5A;NDUFA2;UQCRFS1;TUBA1A;NDUFA1;COX4I1;WNT9A;NDUFB7;TUBA4A;COX6B1;ATP5PO;NDUFA3;NDUFAB1;LPL;PSMC3;NDUFC2;AGER;CDK5;CACNA1F;NOX1;COX7A2;NDUFB9;WNT…	L3-5IT-1
456	GO_Biological_Process_2023__Energy Derivation By Oxidation Of Organic Compounds (GO:0015980)	-0.457645	-2.58328	0	0.000350478	0.017	22/40	20.04%	COX8A;COX6A1;NDUFA4;COX5B;UQCR11;UQCRQ;CYC1;COX7C;COX7B;UQCR10;COX4I1;NR4A3;COX6B1;COX7A2;CYCS;UQCRB;COX5A;MT3;MTLN;UQCRH;UQCRC1;COX6C	L3-5IT-1
457	GO_Biological_Process_2023__Ribosome Assembly (GO:0042255)	-0.443904	-2.57154	0	0.00038293	0.019	31/45	31.38%	RPL10;MPV17L2;RPS15;RRS1;RPS14;RPL11;RPS28;RPS5;MRPL20;C1QBP;RPS27;RPL23A;MRPS7;RPL6;RPS19;RPLP0;EIF6;MRPS2;NOP53;NGRN;SBDS;ERAL1;RPL5;RPSA;RRP7A;TRAF7;MRPS11;NOA1;PPAN;BRIX1;RPS27L	L3-5IT-1
458	GO_Biological_Process_2023__ncRNA Processing (GO:0034470)	-0.350795	-2.5622	0	0.000395485	0.02	57/98	33.44%	EXOSC4;RPL26;RPS15;POP7;RPS16;RPL35A;RPL11;RPL27;RPS7;WDR18;RPS28;TSEN34;RPS27;RPL7;NOC4L;INTS5;EMG1;FBL;RPS25;RPS19;RPS17;RPP21;BYSL;RPS6;NOP53;PIH1D1;TUT1;EXOSC5;RPL14;DDX47;SBDS;PIH1D2;RRP9;WDR74;RPL5;EBNA1BP2;RPS24;NOL6;RRP7A;POP4;THG1L;EXOSC3;LYAR;DDX54;DCAF13;DKC1;NOLC1;RRP36;KARS1;PES1;SSB;MRTO4;NOP56;NOB1;DDX49;UTP15;SPPL2B	L3-5IT-1
459	KEGG_2021_Human__Amyotrophic lateral sclerosis	-0.272313	-2.55699	0	0.000463222	0.024	143/326	29.25%	COX8A;COX7A1;COX6A1;NDUFA7;NDUFA4;PSMB6;COX5B;ATP5F1E;ATP5MC1;NDUFB11;ATP5F1D;ATP5MC3;TUBB2A;TNFRSF1A;UQCR11;NDUFA13;NDUFA6;UQCRQ;NDUFB8;CASP1;PFN1;DNAI2;NDUFA11;CYC1;NDUFB10;CHCHD10;COX7C;ATP5PF;COX7B;UQCR10;NDUFA2;UQCRFS1;TUBA1A;NDUFA1;COX4I1;NDUFB7;GPX2;ERBB4;TUBA4A;COX6B1;ATP5PO;NDUFA3;NDUFAB1;NXT2;PSMC3;NDUFC2;GABARAPL2;COX7A2;DCTN3;NDUFB9;CAT;GABARAP;PSMC5;NXT1;DDIT3;NDUFB2;CYCS;UQCRB;GRIN2…	L3-5IT-1
460	GO_Cellular_Component_2023__Supramolecular Fiber (GO:0099512)	0.496286	2.55102	0	0.0152701	0.036	16/27	20.05%	MFAP5;MYH7;ELN;EFEMP2;MYH11;FBLN5;LTBP1;MYH3;FBN2;THSD4;FBLN1;MYH15;MYO18B;LTBP4;CTPS2;MYH7B	L3-5IT-1
461	GO_Biological_Process_2023__Positive Regulation Of Phospholipase C Activity (GO:0010863)	-0.496925	-2.52684	0	0.000565278	0.03	20/30	20.86%	ADRA1D;LPAR1;PDGFRA;CD86;TXK;EGFR;EDNRA;KIT;P2RY6;HTR2B;PHB1;GPR55;HRAS;P2RY12;FLT1;SELE;PLCB2;FGFR1;PDGFRB;PHB2	L3-5IT-1
462	GO_Biological_Process_2023__Protein Targeting To Mitochondrion (GO:0006626)	-0.401499	-2.51404	0	0.000592345	0.032	46/58	45.91%	DNLZ;TSPO;NDUFA13;TIMM8B;ROMO1;TOMM20L;TOMM22;TIMM13;MGARP;TIMM10;MTX1;FIS1;TOMM7;TIMM17B;PAM16;AIP;TIMM8A;TIMM17A;TOMM5;TIMM10B;HSP90AA1;TOMM20;CHCHD4;TIMM22;GRPEL1;TOMM40L;GRPEL2;BCAP31;MTCH1;TOMM34;TIMM50;DNAJC19;TOMM40;TIMM29;TIMM44;HSPD1;FBXO7;TRMT10B;DNAJC15;TIMM9;MFF;AIFM1;TOMM70;IMMP1L;HSPA4;MTCH2	L3-5IT-1
463	GO_Biological_Process_2023__Ribosomal Small Subunit Biogenesis (GO:0042274)	-0.365153	-2.50913	0	0.000618579	0.034	53/81	37.52%	MRPS12;RPS13;RPS19BP1;RPS15;RPS4X;RPS11;RPS16;RPS23;RPS14;TSR3;RPS7;RPS28;RPS5;RPS3A;RPS9;RPS15A;RPS27;MRPS7;EMG1;FBL;RPS25;RPS19;RPS8;RPS17;RPS6;TBL3;ERAL1;RRP9;RPSA;RPS24;SNU13;WDR46;NOL6;RRP7A;SURF6;MRPS11;NOL7;UTP11;UTP3;RRP36;RIOK2;RPS27L;NOP56;NOB1;UTP15;SPPL2B;DNTTIP2;NPM1;LTV1;MPHOSPH10;PNO1;NGDN;RIOK1	L3-5IT-1
464	WikiPathway_2023_Human__TYROBP Causal Network In Microglia WP3945	-0.422591	-2.50115	0	0.000661425	0.037	23/49	10.50%	RGS1;KCNE3;APBB1IP;CD84;C1QC;ITGAX;LYL1;C3;STAT5A;PYCARD;SFT2D2;IL13RA1;CD4;ITGAM;ZFP36L2;ELF4;NCKAP1L;SPP1;IL18;BIN2;IL10RA;LOXL3;CAPG	L3-5IT-1
465	GO_Biological_Process_2023__Establishment Of Protein Localization To Mitochondrion (GO:0072655)	-0.439642	-2.49923	0	0.000651553	0.037	28/44	31.21%	DNLZ;HK2;TSPO;TIMM8B;ROMO1;TOMM20L;TOMM22;TIMM13;MGARP;TIMM10;FIS1;TOMM7;TIMM17B;PAM16;AIP;TIMM17A;TOMM5;TOMM20;CHCHD4;GRPEL1;PINK1;TOMM40L;GRPEL2;BCAP31;TOMM34;TIMM50;DNAJC19;TOMM40	L3-5IT-1
466	WikiPathway_2023_Human__Mitochondrial Complex III Assembly WP4921	-0.641632	-2.4988	0	0.000641971	0.037	10/15	18.73%	UQCR11;UQCRQ;CYC1;UQCR10;UQCRFS1;UQCC3;BCS1L;UQCRB;UQCRH;UQCRC1	L3-5IT-1
467	GO_Molecular_Function_2023__Active Monoatomic Ion Transmembrane Transporter Activity (GO:0022853)	-0.566931	-2.49604	0	0.000632667	0.037	14/20	18.73%	COX8A;COX7A1;COX5B;COX7C;COX7B;UQCR10;COX4I1;COX6B1;SLC18A2;UQCRB;COX5A;UQCRHL;UQCRH;UQCRC1	L3-5IT-1
468	GO_Molecular_Function_2023__G Protein-Coupled Peptide Receptor Activity (GO:0008528)	0.405337	2.49494	0	0.0170585	0.058	25/50	13.48%	CRHR2;LTB4R;APLNR;SCTR;NPR3;OPRK1;UTS2R;BDKRB2;FPR2;MC4R;KISS1R;GIPR;GLP2R;PTH2R;GHRHR;NPSR1;CRHR1;GPR83;OXTR;MC1R;NMBR;HCRTR2;VIPR2;OPRD1;MCHR2	L3-5IT-1
469	KEGG_2021_Human__Cytokine-cytokine receptor interaction	0.298332	2.48095	0	0.0134129	0.061	64/142	18.34%	XCR1;INHBC;IL18R1;CD27;TNFSF11;CXCL16;CD70;TNFRSF1B;CSF3R;IL21R;IL11RA;LTB;IL33;NODAL;BMP4;GDF15;IL23R;IL17RC;TNFSF9;CSF1;BMP8B;CCL4L2;IL17RB;AMH;TNFRSF10B;CCL5;BMP5;IL15;IFNE;ACVR1C;PRLR;TNFSF18;IL5;BMP3;THPO;IL1R1;CD40;IL11;GDF9;IL13RA2;TNFRSF8;EDA;LEP;IL4R;IL15RA;IL20RB;GDF5;OSMR;MSTN;IL5RA;CXCL17;CNTFR;TGFB2;IL2RB;IL6R;GDF7;LEPR;TNFSF13B;TNFRSF19;IL10RB;TGFB3;TNFSF4;TNFRSF14;IL17RA	L3-5IT-1
470	GO_Biological_Process_2023__Kidney Development (GO:0001822)	0.386973	2.48045	0	0.0107303	0.061	27/54	18.43%	VANGL2;MME;PROX1;SULF1;HNF1B;HAS2;BMP4;LHX1;PAX2;GREB1L;PAX8;ITGA8;PCSK5;KANK2;CYP4A22;PRKX;FGF10;GLI2;CYP4A11;CENPF;AGT;TGFB2;HELLS;SHH;VEGFA;CTSH;NPHP3	L3-5IT-1
471	GO_Biological_Process_2023__Ribosomal Large Subunit Biogenesis (GO:0042273)	-0.405079	-2.47553	0	0.000787742	0.045	39/51	41.05%	RPL26;RPL10;RPL35A;RRS1;RPL11;MRPL20;RPL23A;RPL7;RPL6;NOP16;RSL24D1;RPLP0;RPL26L1;EIF6;NOP53;RPL14;WDR74;RPL5;EBNA1BP2;MAK16;TRAF7;NIP7;SURF6;ZNF622;PPAN;BRIX1;PES1;MRTO4;PAK1IP1;NPM1;SPATA5L1;NOC2L;GTPBP4;NSA2;MALSU1;RRP15;GTF3A;RPF2;TMA16	L3-5IT-1
472	GO_Molecular_Function_2023__Sulfotransferase Activity (GO:0008146)	0.456545	2.45143	0	0.0116933	0.076	20/34	18.03%	SULT1C3;GAL3ST2;CHST3;SULT1A2;SULT6B1;HS3ST2;SULT2A1;SULT1B1;CHST6;GAL3ST4;HS3ST3A1;CHST7;CHST8;SULT2B1;GAL3ST3;GAL3ST1;CHST5;SULT1A3;CHST11;SULT1A1	L3-5IT-1
473	GO_Molecular_Function_2023__Cytokine Activity (GO:0005125)	0.339515	2.40649	0	0.0156828	0.118	42/80	21.96%	INHBC;FAM3B;TNFSF11;CXCL16;CD70;FGF2;IL33;NODAL;BMP4;LEFTY1;GDF15;ALKAL1;TIMP1;CSF1;BMP8B;WNT7B;WNT7A;AMH;WNT2;CCL5;BMP5;IL15;FAM3D;IFNE;IL5;WNT9B;BMP3;IL11;GDF9;WNT3;WNT8A;GDF5;MSTN;TGFB2;GDF7;TGFB3;VEGFA;TGFB1;CXCL13;INHA;KLF5;WNT2B	L3-5IT-1
474	GO_Biological_Process_2023__Detection Of Chemical Stimulus Involved In Sensory Perception (GO:0050907)	0.42796	2.40616	0	0.0137224	0.118	21/35	17.73%	OR2V2;OR2T6;OR2B11;OR2T8;OR10H1;OR2G6;OR10H5;OR2T33;PKD2L1;OR2T7;OR2T2;OR10AC1;OR2T11;OR2AK2;OR2T10;OR2L8;OR2AJ1;OR2L13;OR2M2;OR2M3;OR2M4	L3-5IT-1
475	MSigDB_Hallmark_2020__TNF-alpha Signaling via NF-kB	-0.291673	-2.40122	0	0.00181218	0.104	80/171	24.08%	IL1A;CCN1;EGR2;PHLDA2;FJX1;DUSP2;STAT5A;TRIB1;DUSP4;INHBA;PDE4B;TNC;MSC;CCND1;HES1;TUBB2A;TNFRSF9;PLAU;LITAF;OLR1;MYC;NFKBIE;CLCF1;IL23A;G0S2;PDLIM5;KYNU;KLF4;NR4A3;FOS;TNFAIP3;IL18;SGK1;JAG1;TGIF1;CEBPD;ICOSLG;GPR183;CD80;PTGS2;DUSP5;JUNB;ACKR3;ABCA1;IER3;GADD45B;BCL3;EIF1;NINJ1;KLF10;TNFAIP6;MAFF;KLF2;RCAN1;GADD45A;DUSP1;RELB;BMP2;YRDC;LDLR;BTG3;ID2;IFIT2;EGR1;EDN1;SNN;PPP1R15A;JUN;MARCKS;IER5;…	L3-5IT-1
476	WikiPathway_2023_Human__Extrafollicular And Follicular B Cell Activation By SARS CoV 2 WP5218	-0.417591	-2.39892	0	0.00181892	0.106	19/41	10.26%	SYK;TLR7;IRF8;PTPRC;ETS1;FOXO1;ITGAX;C3;STAT5A;TMSB10;CD22;HSPA8;CD82;CXCL12;EBI3;ICOSLG;GPR183;BLNK;CD80	L3-5IT-1
477	WikiPathway_2023_Human__Eicosanoid Metabolism Via Lipooxygenases LOX WP4721	0.491524	2.38838	0	0.0147657	0.144	13/25	13.01%	LTB4R;HPGD;CYP4F2;GGT5;FPR2;DPEP1;ALOX12;ALOX15;ACOX2;PPARA;LTC4S;CYP4A22;CYP4A11	L3-5IT-1
478	GO_Biological_Process_2023__rRNA Processing (GO:0006364)	-0.324923	-2.38386	0	0.00217169	0.125	55/99	33.44%	EXOSC4;RPL26;NHP2;RPS15;RPS16;RPL35A;RPS14;RPL11;TSR3;RPL27;RPS7;WDR18;RPS28;RPS27;RPL7;NOC4L;EMG1;FBL;RPS25;RPS19;RPS17;RPS6;EIF6;NOP53;PIH1D1;EXOSC5;RPL14;DDX47;SBDS;PIH1D2;RRP9;WDR74;RPL5;EBNA1BP2;RPS24;SNU13;NOL6;RRP7A;POP4;MAK16;EXOSC3;LYAR;DDX54;DCAF13;DKC1;NOLC1;RRP36;RIOK2;PES1;MRTO4;NOP56;NOB1;DDX49;UTP15;SPPL2B	L3-5IT-1
479	WikiPathway_2023_Human__GPCRs Class B Secretin Like WP334	0.527862	2.3797	0	0.0150225	0.159	12/21	12.57%	CRHR2;SCTR;GIPR;ADGRL4;GLP2R;PTH2R;GHRHR;ADGRE5;LINC02210-CRHR1;CRHR1;ADGRE2;VIPR2	L3-5IT-1
480	KEGG_2021_Human__Inflammatory bowel disease	0.401792	2.36919	0	0.0150825	0.175	22/41	19.57%	IL18R1;TLR2;RORC;HLA-DMB;MAF;HLA-DPA1;HLA-DQA1;IL21R;HLA-DQB1;TLR4;IL23R;IL5;HLA-DRB1;NFATC1;HLA-DRA;TLR5;IL4R;TGFB2;STAT4;TGFB3;HLA-DMA;TGFB1	L3-5IT-1
481	KEGG_2021_Human__Systemic lupus erythematosus	-0.374187	-2.35806	0	0.00279435	0.156	28/57	19.01%	CD86;C1QC;H4C3;C3;H2BC11;H4C4;H3C6;ELANE;C1R;C7;HLA-DPB1;H2AC8;HLA-DQA2;H2BC21;C1QB;H2AZ1;H2BC15;CD80;C1QA;H2AC20;H2BC4;H4C5;H3C1;H4C8;H3-3B;H2AX;SNRPB;H2AC6	L3-5IT-1
482	GO_Cellular_Component_2023__Mitochondrial Proton-Transporting ATP Synthase Complex (GO:0005753)	-0.577757	-2.35312	0	0.00284174	0.163	13/17	24.66%	ATP5MF;ATP5F1E;ATP5MC1;ATP5F1D;ATP5MC3;ATP5PF;ATP5ME;ATP5PO;ATP5MJ;ATP5MK;ATP5PD;ATP5F1B;ATP5MG	L3-5IT-1
483	GO_Cellular_Component_2023__Proton-Transporting ATP Synthase Complex (GO:0045259)	-0.577757	-2.35312	0	0.00284174	0.163	13/17	24.66%	ATP5MF;ATP5F1E;ATP5MC1;ATP5F1D;ATP5MC3;ATP5PF;ATP5ME;ATP5PO;ATP5MJ;ATP5MK;ATP5PD;ATP5F1B;ATP5MG	L3-5IT-1
484	GO_Cellular_Component_2023__Mitochondrial Ribosome (GO:0005761)	-0.518907	-2.34664	0	0.00298387	0.172	17/22	32.71%	NDUFA7;MRPS12;MRPL51;MRPL40;MRPL28;MRPL20;MRPL34;MRPL57;MRPL43;MRPL49;MRPL9;MRPL14;MTG1;MRPL35;MRPL18;MRPS22;MRPS14	L3-5IT-1
485	GO_Biological_Process_2023__Icosanoid Metabolic Process (GO:0006690)	0.387355	2.32445	0	0.0202913	0.241	22/43	19.79%	PLA2G10;HPGD;CYP4F2;CYP4F11;PLA2G4A;CYP2S1;ALOX12B;CYP1B1;CYP4F22;ALOX15B;ALOX12;TBXAS1;ALOX15;LTC4S;ALOXE3;CYP4A22;CYP4F3;CYP4A11;CYP2D7;CYP2C8;MAPKAPK2;EPHX1	L3-5IT-1
486	MSigDB_Hallmark_2020__KRAS Signaling Up	-0.278585	-2.32199	0	0.00378512	0.208	66/171	20.07%	CIDEA;ETV1;IRF8;TMEM100;PRRX1;ETS1;C3AR1;GPNMB;TRIB2;TRIB1;LAPTM5;INHBA;IKZF1;MALL;PRKG2;PCP4;JUP;MAFB;DUSP6;PLAU;TMEM176B;FCER1G;ITGA2;ETV5;GYPC;GNG11;CA2;ADAMDEC1;G0S2;DOCK2;GADD45G;RGS16;KLF4;USH1C;PCSK1N;NGF;TNFAIP3;SPP1;ITGBL1;GPRC5B;PLAT;IL10RA;ALDH1A2;PTGS2;PLVAP;RELN;APOD;LCP1;ABCB1;ARG1;PDCD1LG2;HSD11B1;CBX8;SPON1;BMP2;SPRY2;SCG3;MYCN;YRDC;TPH1;RBP4;ID2;TMEM158;TSPAN7;VWA5A;PPP1R15A	L3-5IT-1
487	GO_Biological_Process_2023__Detection Of Chemical Stimulus Involved In Sensory Perception Of Smell (GO:0050911)	0.415886	2.3145	0.00218818	0.0204448	0.253	20/34	17.73%	OR2V2;OR2T6;OR2B11;OR2T8;OR10H1;OR2G6;OR10H5;OR2T33;OR2T7;OR2T2;OR10AC1;OR2T11;OR2AK2;OR2T10;OR2L8;OR2AJ1;OR2L13;OR2M2;OR2M3;OR2M4	L3-5IT-1
488	WikiPathway_2023_Human__Extracellular Vesicles In The Crosstalk Of Cardiac Cells WP4300	-0.564834	-2.31366	0	0.00396987	0.218	11/16	22.26%	KDR;IGF1;EGFR;EGF;PDLIM5;SPP1;CD63;SOD1;HSPB1;BIRC5;CD81	L3-5IT-1
489	GO_Molecular_Function_2023__Cytokine Receptor Activity (GO:0004896)	0.367796	2.31278	0	0.0193971	0.258	28/51	19.89%	IL18R1;CSF3R;IL21R;IL11RA;CMKLR1;FLT3;CD44;IL23R;IL17RC;GFRAL;GFRA1;IL17RB;PRLR;IL17REL;IL1R1;IL13RA2;IL4R;IL15RA;IL17RD;OSMR;IL5RA;CNTFR;IL2RB;IL6R;LEPR;IL10RB;IL17RA;LIFR	L3-5IT-1
490	KEGG_2021_Human__Hematopoietic cell lineage	0.35303	2.30344	0	0.0199199	0.283	31/59	19.17%	MME;GP1BA;ANPEP;HLA-DMB;CSF3R;CR2;CD38;HLA-DPA1;HLA-DQA1;IL11RA;HLA-DQB1;FLT3;CD5;CD44;CSF1;ITGA6;CR1;IL5;CD37;HLA-DRB1;THPO;IL1R1;HLA-DRA;IL11;IL4R;IL5RA;IL6R;ITGA1;HLA-DMA;ITGA2B;ITGA4	L3-5IT-1
491	GO_Biological_Process_2023__Negative Regulation Of Actin Filament Polymerization (GO:0030837)	-0.493149	-2.29969	0	0.004509	0.245	14/22	23.56%	TMSB10;SCIN;PFN1;TMSB4Y;KANK3;TMSB4X;KANK1;PFN4;SSH3;VIL1;PFN2;TWF2;PRKCD;GSN	L3-5IT-1
492	GO_Biological_Process_2023__ERK1 And ERK2 Cascade (GO:0070371)	-0.503474	-2.2931	0.00189036	0.0048079	0.264	13/23	15.11%	AVP;KDR;DUSP6;MYC;IGF1;EGF;ZFP36L2;LGALS9;ZFP36L1;HTR2B;DUSP5;CDK1;MT3	L3-5IT-1
493	GO_Biological_Process_2023__Sensory Perception Of Smell (GO:0007608)	0.368219	2.29173	0	0.0203773	0.3	25/48	17.73%	DRD2;OR2V2;OR1D2;OR2T6;OR2B11;OR2T8;OR10H1;OR2G6;OR10H5;OR2T33;OR2T7;CNGB1;OR2T2;NXNL2;OR10AC1;OR2T11;OR8D4;OR2AK2;OR2T10;OR2L8;OR2AJ1;OR2L13;OR2M2;OR2M3;OR2M4	L3-5IT-1
494	WikiPathway_2023_Human__17P13 3 YWHAE Copy Number Variation WP5376	-0.520372	-2.29074	0	0.00480531	0.268	19/19	48.03%	DISC1;CDK5;DCTN3;DBH;YWHAH;DCTN6;DCTN1;YWHAB;PPP2CA;DCTN2;YWHAG;YWHAZ;YWHAQ;NDEL1;YWHAE;DYNC1H1;DCTN5;DCTN4;PAFAH1B1	L3-5IT-1
495	GO_Biological_Process_2023__Long-Chain Fatty Acid Biosynthetic Process (GO:0042759)	0.516918	2.29037	0.00214592	0.01947	0.304	13/20	16.98%	ALOX12B;GSTM2;ALOX15B;ALOX12;ALOX15;LTC4S;ALOXE3;CYP3A4;ACSBG1;ASAH2;ACSBG2;CYP2D7;CYP2C8	L3-5IT-1
496	GO_Cellular_Component_2023__Collagen-Containing Extracellular Matrix (GO:0062023)	-0.243499	-2.2877	0	0.00485814	0.272	123/298	21.44%	COL3A1;ANGPT1;TGFBI;LGALS1;VCAN;AZGP1;C1QC;CCN2;CCDC80;SFRP1;COL9A2;COL6A2;CBLN4;TINAGL1;COL4A5;CSPG4;NPNT;TNC;SMOC2;MGP;RARRES2;ELANE;ANGPTL2;ANGPTL3;ANXA1;S100A10;SFRP2;EMILIN1;COL24A1;VWA1;LOXL4;APOH;ADAMDEC1;GREM1;MATN1;WNT5A;EMILIN2;THBS2;CLEC14A;CXCL12;NPPA;LOX;COL17A1;PRTN3;ADAMTS20;C1QB;LGALS9;HPX;PXDN;COL9A3;CBLN1;IL7;S100A6;FREM3;VTN;ANGPTL6;ANGPTL1;ADAMTS4;PLAT;MMRN1;ANGPTL7;ADAMTS1;PL…	L3-5IT-1
497	GO_Biological_Process_2023__Sensory Perception Of Light Stimulus (GO:0050953)	0.320827	2.28611	0	0.0193513	0.315	37/80	21.62%	EFEMP1;ROM1;CRYBG3;EYA4;FSCN2;PAX6;ZIC2;CRYBB3;ARR3;TRPM1;DHRS3;CNGB1;PAX2;PRR4;NXNL2;GPR143;AOC2;BEST1;PCDH15;RS1;CABP4;CRYBA1;VAX2;TULP2;COL18A1;CDH23;CLRN1;CRYGA;E2F1;GPR179;USH2A;CRYBB2;PDE6C;RDH12;WFS1;GUCA1B;ADGRV1	L3-5IT-1
498	GO_Biological_Process_2023__Positive Regulation Of Pathway-Restricted SMAD Protein Phosphorylation (GO:0010862)	0.387222	2.28006	0	0.0193754	0.329	21/39	21.61%	INHBC;HFE;NODAL;BMP4;LEFTY1;GDF15;BMP8B;TTK;TNXB;BMP5;BMP3;ENG;GDF9;GDF5;MSTN;PPARG;TGFB2;GDF7;TGFB3;TGFB1;INHA	L3-5IT-1
499	GO_Molecular_Function_2023__G Protein-Coupled Receptor Activity (GO:0004930)	0.259615	2.24531	0	0.025175	0.415	58/168	14.14%	CRHR2;NPFFR2;NMUR2;DRD2;LTB4R;APLNR;SCTR;MRGPRF;OPN4;GPR149;NPR3;OPRK1;CNR2;RGR;UTS2R;ADORA2B;FPR2;PROKR2;KISS1R;ADGRF4;CMKLR1;F2R;LGR5;GIPR;GPR157;ADGRL4;MTNR1A;ADGRF1;GLP2R;PTH2R;TRHR;GHRHR;ADGRE5;ADGRG5;ADGRG6;CRHR1;PAX8;GPR143;ADGRG3;DRD1;CMKLR2;GPR83;GPR78;S1PR1;ADGRD1;SSTR3;GPR88;C5AR1;MC1R;GPR35;ADGRE2;PDGFRL;VIPR2;GPER1;OPRD1;MCHR2;GPR26;LPAR2	L3-5IT-1
500	GO_Biological_Process_2023__ATP Biosynthetic Process (GO:0006754)	-0.484567	-2.24372	0.00189753	0.00785007	0.395	19/24	35.51%	ATP5MF;ATP5F1E;ATP5MC1;ATP5F1D;ATP5MC3;ATP5PF;ATP5ME;ATP5PO;ATP5MJ;ATP5MK;ALDOA;ATP5PD;ATP5F1B;ATP5MG;NUDT2;ATP5F1A;ATP5PB;VPS9D1;ATP5MC2	L3-5IT-1
501	GO_Biological_Process_2023__Chaperone-Mediated Protein Complex Assembly (GO:0051131)	-0.499592	-2.24095	0	0.0080145	0.402	18/21	39.90%	THEG;HSPA1A;PTGES3L;PFDN6;PSMG3;HSP90AB1;CLU;HOPX;CCT2;HSP90AA1;BBS12;TMEM35A;BBS10;NDUFAF1;PSMG1;HSPD1;PTGES3;MKKS	L3-5IT-1
502	GO_Cellular_Component_2023__Brush Border Membrane (GO:0031526)	0.402533	2.22939	0	0.0273564	0.46	19/33	24.23%	ATP6V0A4;CYBRD1;SLC9A3;SLC17A3;SLC28A1;SLC28A3;AQP1;SLC5A1;AQP8;CUBN;SLC26A6;ACE2;SLC7A9;PLB1;SLC26A4;B4GALT1;PEX19;CDHR2;CD36	L3-5IT-1
503	GO_Cellular_Component_2023__Small-Subunit Processome (GO:0032040)	-0.333875	-2.22622	0	0.00903003	0.439	39/70	33.67%	MRPS12;RPS27A;RPS13;RPS19BP1;RPS4X;RPS11;RPS16;RPS23;RPS14;RPS7;RPS28;RPS5;RPS3A;RPS9;RPS15A;RPS27;NOC4L;EMG1;FBL;RPS19;RPS8;RPS17;RPS6;TBL3;RRP9;RPS24;SNU13;WDR46;NOL6;RRP7A;FBLL1;DCAF13;NOL7;UTP11;UTP3;NOP56;UTP15;SPPL2B;DNTTIP2	L3-5IT-1
504	GO_Biological_Process_2023__Adenylate Cyclase-Activating G Protein-Coupled Receptor Signaling Pathway (GO:0007189)	0.31735	2.212	0	0.030165	0.514	30/77	13.68%	DRD2;PTGFR;ADM;ADCY4;ADORA2B;MC4R;ADGRF4;ADRA2A;TCP11;GIPR;GPR157;ADGRL4;PTGER2;ADGRF1;PTGER3;GHRHR;ADGRE5;ADGRG5;ADGRG6;CRHR1;ADGRG3;PTGIR;DRD1;GPR78;ADGRD1;CALCB;MC1R;ADGRE2;GPER1;GPR26	L3-5IT-1
505	GO_Cellular_Component_2023__Mitochondrial Intermembrane Space (GO:0005758)	-0.351823	-2.21165	0	0.0100354	0.475	35/59	34.05%	TIMM8B;BLOC1S1;CHCHD2;PRELID1;CHCHD10;NDUFB7;TIMM13;TIMM10;ALPL;CYCS;NDUFA8;HSD3B1;TRIAP1;ARL2;SOD1;HAX1;HTRA2;STOML2;TIMM8A;COA4;NME4;TIMM10B;COX17;CHCHD5;COA7;CHCHD4;PINK1;PRELID3B;DIABLO;ARL2BP;UQCC2;REXO2;THOP1;TIMM29;SDHAF3	L3-5IT-1
506	GO_Biological_Process_2023__Antigen Processing And Presentation Of Endogenous Peptide Antigen (GO:0002483)	0.488718	2.21023	0	0.0291764	0.521	13/20	20.14%	ULBP1;MICB;HFE;RAET1G;RAET1E;ULBP2;HLA-F;TAP1;HLA-DRB1;HLA-DRA;TAP2;ULBP3;ERAP2	L3-5IT-1
507	GO_Biological_Process_2023__Protein Insertion Into Mitochondrial Membrane (GO:0051204)	-0.448407	-2.20637	0	0.0104435	0.496	18/27	33.69%	NDUFA13;TIMM8B;ROMO1;TOMM22;TIMM13;TIMM10;MTX1;TOMM7;MOAP1;TIMM8A;TOMM5;TIMM10B;HSP90AA1;TOMM20;TIMM22;MTCH1;TOMM40;TIMM29	L3-5IT-1
508	GO_Biological_Process_2023__Regulation Of T Cell Proliferation (GO:0042129)	0.350053	2.19666	0	0.0316407	0.561	22/51	15.41%	VSIG4;SDC4;CD70;HLA-DMB;TNFRSF1B;HLA-DPA1;CD274;IL23R;TNFSF9;PNP;IL4I1;CR1;CCL5;CD6;IL15;TNFSF18;HLA-DRB1;LGALS3;LEP;SPN;CCDC88B;ZP3	L3-5IT-1
509	KEGG_2021_Human__ECM-receptor interaction	0.312609	2.19562	0	0.0305402	0.563	34/74	19.94%	CHAD;SDC4;GP1BA;ITGB4;ITGA11;FREM2;SDC1;LAMA2;LAMA4;CD44;ITGA6;HSPG2;TNXB;SV2C;LAMC2;COL4A6;LAMC3;ITGA8;LAMB2;LAMB4;LAMA3;TNN;ITGA7;HMMR;COL6A6;ITGA9;ITGA10;LAMA1;LAMA5;ITGA1;ITGA2B;THBS4;ITGA4;GP6	L3-5IT-1
510	GO_Molecular_Function_2023__Serine-Type Endopeptidase Inhibitor Activity (GO:0004867)	0.421847	2.18784	0	0.0313021	0.59	16/30	20.96%	SERPINA10;SERPINE1;SERPINC1;TFPI;AMBP;SERPINH1;SERPINF2;SERPINB8;SPINK5;WFDC2;ANXA2;SPINK9;MANSC4;SPINT1;SERPINB9;SERPING1	L3-5IT-1
511	GO_Biological_Process_2023__Positive Regulation Of Cellular Metabolic Process (GO:0031325)	-0.360535	-2.18397	0	0.0127787	0.576	26/46	26.65%	TGFBR2;CHCHD2;EEF1E1;MUSK;PRELID1;ROMO1;SLCO1C1;CDK1;DCXR;HPN;B2M;GADD45A;LIPT2;MT3;CBR1;F2;YPEL3;THBS1;PDGFRB;IFNLR1;AKR1C1;DHRS4;GHITM;PDGFB;AKR1C3;TP53	L3-5IT-1
512	GO_Biological_Process_2023__Zymogen Activation (GO:0031638)	-0.404634	-2.17425	0.00186567	0.0136706	0.603	22/32	34.06%	MMP14;MASP1;C1R;PLAU;APOH;PLAT;FADD;CYCS;BAK1;F12;PERP;NLRC4;BAD;CASP8;PRSS12;PRSS3;CTSL;TBC1D10A;OMA1;FURIN;PGK1;RIPK2	L3-5IT-1
513	WikiPathway_2023_Human__Imatinib And Chronic Myeloid Leukemia WP3640	-0.504703	-2.17302	0	0.0136971	0.608	12/20	20.59%	PDGFRA;LYL1;MYC;KIT;CSF1R;ABCG2;ABCB1;FLT1;GADD45A;PIM2;SPRED2;PDGFRB	L3-5IT-1
514	GO_Biological_Process_2023__Hydrogen Peroxide Catabolic Process (GO:0042744)	-0.546159	-2.17233	0	0.0135857	0.609	10/15	15.80%	HBA1;PRDX5;PRDX2;HBQ1;HBB;PXDN;CAT;PRDX1;PRDX4;GPX3	L3-5IT-1
515	GO_Biological_Process_2023__mRNA Processing (GO:0006397)	-0.246707	-2.16708	0	0.0139831	0.619	201/205	73.13%	SF3B5;HSPA8;RAMAC;GEMIN7;SNRPD2;U2AF1L4;BUD31;RBM42;ALYREF;LSM3;LSM4;LSM7;SF3B4;XAB2;SNRPB;RNF113A;SF3B6;TBRG4;SNRPE;SNU13;DDX39A;ESS2;GEMIN6;GPKOW;SRSF2;MBLAC1;HEXIM1;SNRPA;LSM2;RBM22;HTATSF1;SNRPB2;DDX23;EIF4A3;IK;CWC15;HNRNPA1;WDR83;BCAS2;PIN1;SRSF8;SNRPD3;PPIL1;ZMAT2;RBM4B;RBM8A;SYF2;FRG1;SNRPN;SNRPG;SNRNP35;TFIP11;HNRNPA0;DDX41;SYNCRIP;NCBP2;SNRPA1;PHF5A;SF3B2;DBR1;PRPF4;MFAP1;HNRNPK;SRSF3;S…	L3-5IT-1
516	GO_Biological_Process_2023__Detection Of Chemical Stimulus Involved In Sensory Perception Of Taste (GO:0050912)	0.43296	2.1657	0	0.0363792	0.652	16/25	21.13%	CA6;TAS2R7;TAS2R8;TAS2R9;TAS2R1;RTP5;PKD2L1;TAS2R10;TAS2R31;TAS2R4;TAS2R19;PKD1L3;TAS2R13;TAS2R46;TAS2R30;TAS2R50	L3-5IT-1
517	WikiPathway_2023_Human__Vitamin D Receptor Pathway WP2877	-0.278212	-2.16414	0	0.0142132	0.626	48/127	17.02%	CRACR2B;IRF8;CYP24A1;DUSP10;FOXO1;SFRP1;VDR;CD9;CCND1;TNFRSF11B;SULT1C2;TRPV5;KLK6;MYC;PRKCQ;PNOC;HSD17B2;S100A2;BMP6;CDKN2A;G0S2;ID4;ITGAM;HLA-DQA2;KLF4;LGALS9;NFATC2;TNFAIP3;SPP1;ALOX5;S100A6;ID1;NOX1;PTHLH;JUNB;ABCD1;CYP2D6;ABCB1;NINJ1;CDKN2D;KNG1;SERPINB1;GADD45A;HILPDA;IRF5;CLMN;CDKN2C;CEBPA	L3-5IT-1
518	GO_Cellular_Component_2023__Organelle Envelope Lumen (GO:0031970)	-0.333736	-2.15971	0	0.0146803	0.644	37/65	34.05%	TUBB2A;TIMM8B;BLOC1S1;CHCHD2;PRELID1;CHCHD10;NDUFB7;TIMM13;ALOX5;TIMM10;ALPL;CYCS;NDUFA8;HSD3B1;TRIAP1;ARL2;SOD1;HAX1;HTRA2;STOML2;TIMM8A;COA4;NME4;TIMM10B;COX17;CHCHD5;COA7;CHCHD4;PINK1;PRELID3B;DIABLO;ARL2BP;UQCC2;REXO2;THOP1;TIMM29;SDHAF3	L3-5IT-1
519	KEGG_2021_Human__Neuroactive ligand-receptor interaction	0.23228	2.15536	0	0.0382636	0.687	84/235	17.00%	CRHR2;NPFFR2;NMUR2;DRD2;GABRP;LTB4R;APLNR;PTGFR;SCTR;ADM;GABRE;CHRNA2;KISS1;PTGDR;HTR1B;HTR7;OPRK1;GRIK1;CHRNG;CNR2;FSHR;UTS2R;GRID2;BDKRB2;ADORA2B;FPR2;MC4R;KISS1R;ADRA2A;F2R;HCRT;GIPR;TACR2;HRH4;CHRNA6;PDYN;MTNR1A;PTGER2;INSL3;GLP2R;PTH2R;TRHR;PTGER3;HTR1A;GHRHR;CRHR1;CHRNE;PRLR;PTGIR;DRD4;DRD1;GLRA1;GPR83;OXTR;S1PR1;CHRNB4;SSTR3;CALCB;C5AR1;MC1R;GPR35;NMBR;GABRR2;HCRTR2;TACR1;CHRM2;VIPR2;GRIN2…	L3-5IT-1
520	GO_Molecular_Function_2023__Taste Receptor Activity (GO:0008527)	0.488363	2.15411	0	0.0373996	0.69	13/19	21.13%	TAS2R7;TAS2R8;TAS2R9;TAS2R1;PKD2L1;TAS2R10;TAS2R31;TAS2R4;TAS2R19;TAS2R13;TAS2R46;TAS2R30;TAS2R50	L3-5IT-1
521	GO_Biological_Process_2023__Positive Regulation Of Production Of Molecular Mediator Of Immune Response (GO:0002702)	-0.460754	-2.15218	0	0.0156283	0.668	16/25	26.42%	CD86;PTPRC;LAPTM5;CLCF1;INAVA;HLA-E;SASH3;WNT5A;LACC1;PHB1;IRF5;DNAJB9;PHB2;SCIMP;STX4;XBP1	L3-5IT-1
522	GO_Biological_Process_2023__Negative Regulation Of Transposition (GO:0010529)	0.475555	2.14592	0.00423729	0.0384366	0.708	12/20	20.34%	APOBEC3A;APOBEC3G;APOBEC3H;PIWIL1;SPOCD1;ZNF93;TEX15;PIWIL2;TDRD12;TDRD9;MYBL1;PIWIL4	L3-5IT-1
523	GO_Biological_Process_2023__Positive Regulation Of Biosynthetic Process (GO:0009891)	0.372242	2.14471	0	0.0376227	0.709	23/39	28.43%	HSD17B13;CYBA;TLR4;F2R;BMP4;SERPINF2;CCL5;PLCG2;VIM;PPARA;RUNX1;SCX;ZBTB20;TGFB3;MLST8;SLC5A3;TGFB1;MLXIPL;AKT1;CD36;NR1H3;RAB27A;GRIN1	L3-5IT-1
524	MSigDB_Hallmark_2020__Epithelial Mesenchymal Transition	-0.25594	-2.13832	0	0.0175516	0.712	79/176	23.59%	COL3A1;CCN1;TGFBI;LGALS1;VCAN;PRRX1;CCN2;SFRP1;MYL9;COL6A2;MMP14;INHBA;TNC;TNFRSF11B;MGP;VEGFC;WIPF1;CDH6;ITGA2;BDNF;SFRP4;GREM1;WNT5A;THBS2;CXCL12;CDH11;LOX;TNFAIP3;SPP1;SCG2;EMP3;PDLIM4;ITGB5;PTHLH;ADAM12;TPM2;CAPG;PCOLCE2;HTRA1;BGN;DCN;GADD45B;SPARC;BMP1;NT5E;COL5A2;IL32;GADD45A;SERPINE2;THY1;ECM2;COL11A1;RGS4;ACTA2;MCM7;MATN2;IGFBP2;ID2;FAS;PFN2;THBS1;COL5A1;CRLF1;JUN;PDGFRB;PMP22;COL16A1;FST…	L3-5IT-1
525	GO_Biological_Process_2023__Renal System Development (GO:0072001)	0.360693	2.13607	0	0.0393875	0.735	21/43	18.43%	MME;PROX1;SULF1;HNF1B;HAS2;BMP4;LHX1;PAX2;GREB1L;PAX8;ITGA8;PCSK5;CYP4A22;GLI2;CYP4A11;CENPF;AGT;TGFB2;HELLS;VEGFA;NPHP3	L3-5IT-1
526	WikiPathway_2023_Human__Selenium Micronutrient Network WP15	-0.337876	-2.13283	0	0.0181696	0.727	35/65	26.71%	HBA1;APOB;PRDX5;GPX4;SELENOM;PTGS1;PRDX2;SELENOW;KYNU;GPX2;SELENOP;HBB;ALOX5;PLAT;PLG;KMO;CAT;PTGS2;MSRB1;ABCA1;PRDX1;SOD1;PRDX4;GPX3;LDLR;F2;TXN;SEPHS2;CBS;PNPO;RFK;SELENOK;FLAD1;SELENOH;SELENOS	L3-5IT-1
527	GO_Biological_Process_2023__Ribosomal Small Subunit Assembly (GO:0000028)	-0.556307	-2.13082	0	0.0182182	0.732	12/15	31.38%	RPS15;RPS14;RPS28;RPS5;RPS27;MRPS7;RPS19;ERAL1;RPSA;RRP7A;MRPS11;RPS27L	L3-5IT-1
528	WikiPathway_2023_Human__Cholesterol Biosynthesis Pathway WP197	-0.538152	-2.12403	0	0.0191388	0.763	14/15	41.06%	IDI1;DHCR7;PMVK;SQLE;HMGCS1;CYP51A1;FDPS;NSDHL;MSMO1;MVK;FDFT1;SC5D;MVD;HMGCR	L3-5IT-1
529	GO_Biological_Process_2023__RNA Splicing, Via Transesterification Reactions With Bulged Adenosine As Nucleophile (GO:0000377)	-0.251842	-2.12211	0	0.0192678	0.767	167/173	70.97%	SF3B5;HSPA8;GEMIN7;SNRPD2;U2AF1L4;BUD31;RBM42;LSM3;LSM4;LSM7;SF3B4;XAB2;SNRPB;RNF113A;SF3B6;SNRPE;SNU13;DDX39A;ESS2;GEMIN6;GPKOW;SRSF2;SNRPA;LSM2;RBM22;HTATSF1;SNRPB2;DDX23;EIF4A3;IK;CWC15;HNRNPA1;WDR83;BCAS2;PIN1;SRSF8;SNRPD3;PPIL1;ZMAT2;RBM4B;RBM8A;SYF2;FRG1;SNRPN;SNRPG;SNRNP35;TFIP11;DDX41;SYNCRIP;NCBP2;SNRPA1;PHF5A;SF3B2;DBR1;PRPF4;MFAP1;HNRNPK;SRSF3;SRSF7;RBMX2;LSM5;RBM10;MAGOHB;SLU7;CRNKL1;…	L3-5IT-1
530	MSigDB_Hallmark_2020__Interferon Gamma Response	0.239107	2.11128	0	0.0466482	0.804	63/172	19.10%	GBP6;DDX60;IFI44L;IFIH1;USP18;CD38;LATS2;HLA-DQA1;EPSTI1;OAS2;NLRC5;PLA2G4A;CMKLR1;PSMB8;CD274;APOL6;CFH;OAS3;PSMB9;IFITM2;PNP;IRF4;CDKN1A;ICAM1;TXNIP;MVP;ISG20;CCL5;IL15;HELZ2;SAMD9L;TAP1;LGALS3BP;LCP2;PARP12;PTPN6;HLA-DRB1;CD40;FGL2;TNFAIP2;ZBP1;PIM1;IFITM3;IL4R;GBP4;CASP7;IL15RA;RNF31;MX2;IL18BP;IL2RB;MT2A;IFI35;CIITA;STAT4;IRF9;CMPK2;GCH1;HLA-DMA;DHX58;NFKBIA;IDO1;BTG1	L3-5IT-1
531	WikiPathway_2023_Human__Canonical And Non Canonical Notch Signaling WP3845	-0.436826	-2.10911	0.00191939	0.0213315	0.797	16/25	27.67%	NOTCH1;HES1;LEF1;RRAS;JAG1;CNTN6;DLL3;NOTCH3;HEY1;NOTCH4;PSEN2;MAML3;DLK2;DNER;JAG2;DLL1	L3-5IT-1
532	GO_Biological_Process_2023__Positive Regulation Of Extrinsic Apoptotic Signaling Pathway (GO:2001238)	-0.430087	-2.1078	0.00392927	0.0214143	0.8	15/28	19.52%	SFRP1;PMAIP1;PYCARD;TNFSF10;INHBA;G0S2;CAV1;TLR6;FADD;LTBR;BID;HYAL2;HTRA2;TNFSF12;THBS1	L3-5IT-1
533	WikiPathway_2023_Human__2Q37 Copy Number Variation Syndrome WP5224	-0.283481	-2.1054	0	0.0216724	0.816	50/102	30.24%	IRF8;DISC1;NEDD8;HES1;CALCRL;TRPM8;IL13RA1;TWIST2;EGFR;ERFE;PER2;HAMP;SH3BP4;CXCL12;COPS9;GABARAPL2;RRAGA;GABARAP;BOK;ACKR3;ASCL1;HES6;ABCA1;NEU4;ASB18;MAP1LC3A;RAB17;RPS6;ARF5;DUSP28;SEPTIN4;CALM1;RBM44;JUN;DGKD;DTYMK;UBE2F;COL6A3;ILK;EEF1A1;CYTH2;MAP1LC3B;RNPEPL1;TP53;ARL4C;RAC1;COPS8;GPC1;PDGFA;GABARAPL1	L3-5IT-1
534	GO_Biological_Process_2023__Positive Regulation Of Glial Cell Differentiation (GO:0045687)	-0.507572	-2.09496	0.00196464	0.0233697	0.841	11/16	22.86%	EGR2;NOTCH1;HES1;CLCF1;MDK;PTPRZ1;SERPINE2;BMP2;ID2;ZNF365;IL34	L3-5IT-1
535	GO_Biological_Process_2023__mRNA Splicing, Via Spliceosome (GO:0000398)	-0.241398	-2.09465	0	0.0231926	0.841	199/204	73.13%	SF3B5;HSPA8;SRPK3;GEMIN7;SNRPD2;U2AF1L4;PUF60;BUD31;RBM42;PQBP1;LSM3;LSM4;LSM7;GEMIN4;TSSC4;SF3B4;XAB2;SNRPB;SCNM1;RNF113A;SF3B6;SNRPE;SNU13;DDX39A;ESS2;GEMIN6;GPKOW;WDR77;SRSF2;SNRPA;LSM2;RBM22;HTATSF1;SNRPB2;DDX23;EIF4A3;IK;CWC15;HNRNPA1;WDR83;BCAS2;PIN1;SRSF8;SMN1;SNRPD3;GEMIN8;PPIL1;ZMAT2;RBM4B;RBM8A;SYF2;FRG1;SNRPN;SNRPG;SNRNP35;TFIP11;DDX41;SYNCRIP;NCBP2;SNRPA1;PHF5A;SF3B2;DBR1;PRPF4;DDX20;…	L3-5IT-1
536	GO_Biological_Process_2023__Positive Regulation Of Morphogenesis Of An Epithelium (GO:1905332)	0.478933	2.08962	0.00433839	0.0541615	0.86	12/18	19.86%	SIX4;FGF2;BMP4;LHX1;PAX2;GJA1;PAX8;SMO;MMRN2;PIK3CD;VEGFA;SOX9	L3-5IT-1
537	GO_Biological_Process_2023__Protein Import Into Mitochondrial Matrix (GO:0030150)	-0.499176	-2.07776	0.00384615	0.0264222	0.879	14/18	35.28%	DNLZ;ROMO1;TOMM20L;TIMM17B;PAM16;TIMM17A;TOMM20;GRPEL1;TOMM40L;GRPEL2;TIMM50;DNAJC19;TOMM40;TIMM44	L3-5IT-1
538	GO_Biological_Process_2023__Visual Perception (GO:0007601)	0.289372	2.07699	0	0.0585569	0.891	34/79	21.62%	EFEMP1;ROM1;CRYBG3;EYA4;FSCN2;REEP6;PAX6;ZIC2;CRYBB3;ARR3;TRPM1;DHRS3;CNGB1;PAX2;PRR4;NXNL2;GPR143;AOC2;BEST1;RS1;CABP4;CRYBA1;VAX2;TULP2;COL18A1;CRYGA;E2F1;GPR179;CRYBB2;PDE6C;RDH12;WFS1;GUCA1B;ADGRV1	L3-5IT-1
539	GO_Biological_Process_2023__Adenylate Cyclase-Modulating G Protein-Coupled Receptor Signaling Pathway (GO:0007188)	0.265615	2.07685	0	0.0570221	0.891	42/123	14.32%	CRHR2;PTGFR;SCTR;ADM;HTR1B;OPRK1;ADCY4;ADORA2B;FPR2;GNA15;MC4R;ADGRF4;ADRA2A;TCP11;GIPR;GPR157;ADGRL4;MTNR1A;PTGER2;INSL3;ADGRF1;GLP2R;PTH2R;PTGER3;GHRHR;ADGRE5;ADGRG5;ADGRG6;CRHR1;ADGRG3;PTGIR;DRD1;GPR78;ADGRD1;CALCB;MC1R;ADGRE2;CHRM2;VIPR2;GPER1;GPR26;HTR1F	L3-5IT-1
540	GO_Cellular_Component_2023__Mitochondrial Envelope (GO:0005740)	-0.263516	-2.0761	0	0.026486	0.882	67/138	31.95%	CIDEA;VRK2;FLVCR2;IFI27L2;SLC22A3;NDUFA13;NDUFA6;TIMM8B;BLOC1S1;CHCHD2;PRELID1;CHCHD10;NDUFA2;NDUFA1;NDUFB7;TIMM13;IFI27;NDUFAB1;GPAT2;TIMM10;ALPL;FZD9;BOK;CYCS;ABCD1;NDUFA8;HSD3B1;TRIAP1;NDUFS3;ARL2;SOD1;HAX1;HTRA2;STOML2;SLC25A4;TIMM8A;SDHD;NGRN;COA4;ATP5F1B;NME4;TIMM10B;COX17;CHCHD5;COA7;CHCHD4;TMEM70;PINK1;NDUFAF4;BNIP3;BNIP1;PRELID3B;TMEM14C;DIABLO;VDAC2;FKBP8;TMEM14B;ARL2BP;VDAC1;SLC8B1;OMA…	L3-5IT-1
541	GO_Biological_Process_2023__Regulation Of MAP Kinase Activity (GO:0043405)	-0.282071	-2.07471	0	0.0265276	0.884	50/101	27.77%	ROBO1;TRIB2;TRIB1;SPRY4;ELANE;PIK3R5;SPRY1;GHR;EGFR;EGF;KIT;LYN;PDGFD;HTR2B;GSTP1;EDN3;TGFA;FGF1;CBLC;CAV3;BMP7;HRAS;PIK3R6;CD24;FLT1;APOE;DUSP1;MST1R;BMP2;HYAL2;SPRY2;IRAK1;RGS14;DIRAS1;EDN1;THBS1;FGFR1;PRKCD;SMPD1;PDGFRB;IL34;ERP29;UCHL1;RGS2;DIRAS2;TRIB3;PDGFB;DUSP7;GBA1;TENM1	L3-5IT-1
542	GO_Biological_Process_2023__Pulmonary Valve Morphogenesis (GO:0003184)	-0.522156	-2.0741	0	0.0263804	0.885	9/15	13.59%	ROBO1;HEY2;NOTCH1;SMAD6;HEYL;NOS3;JAG1;HEY1;ROBO2	L3-5IT-1
543	GO_Biological_Process_2023__Linoleic Acid Metabolic Process (GO:0043651)	0.481946	2.0734	0.0021645	0.0567079	0.894	10/18	13.01%	RAPSN;ELOVL3;ALOX12B;GSTM2;ALOX15B;ALOX12;ALOX15;ALOXE3;CYP4A22;CYP4A11	L3-5IT-1
544	GO_Biological_Process_2023__Positive Regulation Of ERK1 And ERK2 Cascade (GO:0070374)	-0.263376	-2.06967	0	0.0272812	0.892	52/131	20.86%	ADRA1D;ANGPT1;PDGFRA;PTPRC;KDR;CCN2;DDT;GPNMB;PYCARD;NPNT;P2RY1;NOTCH1;NECAB2;IGF1;HTR2C;CHI3L1;ALKAL2;EGFR;MUSK;CD4;P2RY6;CSF1R;PLA2G5;CD74;ERBB4;LGALS9;PDGFD;CIB1;DDR1;HTR2B;GCNT2;AGER;GPR183;FGF1;PHB1;GPR55;ACKR3;HRAS;NELL1;APOE;MT3;BMP2;GLIPR2;SPRY2;NTRK1;RAMP3;PDE8A;TNFRSF11A;GAREM1;PDGFRB;ADCYAP1;PHB2	L3-5IT-1
545	MSigDB_Hallmark_2020__IL-6/JAK/STAT3 Signaling	0.315305	2.05995	0	0.0615148	0.921	26/58	20.87%	REG1A;IL18R1;TLR2;TNFRSF1B;CSF3R;CD38;HMOX1;LTB;CD44;CSF1;IL17RB;IL1R1;PIM1;IL4R;MAP3K8;IL15RA;OSMR;CNTFR;LEPR;IL10RB;IRF9;IL17RA;ITGA4;PDGFC;TGFB1;CXCL13	L3-5IT-1
546	GO_Biological_Process_2023__Extrinsic Apoptotic Signaling Pathway Via Death Domain Receptors (GO:0008625)	-0.422971	-2.05693	0.00367647	0.0300224	0.917	19/27	33.73%	CASP10;TNFRSF10A;TNFRSF1A;NGF;GABARAP;FADD;BID;MOAP1;TRADD;DDX47;DAXX;BAX;CASP8;DEDD2;DIABLO;DEDD;BCL2;DAB2IP;BLOC1S2	L3-5IT-1
547	GO_Biological_Process_2023__Pulmonary Valve Development (GO:0003177)	-0.471594	-2.05677	0.00192308	0.0297974	0.917	10/19	13.59%	ROBO1;HEY2;NOTCH1;TNFRSF1A;SMAD6;HEYL;NOS3;JAG1;HEY1;ROBO2	L3-5IT-1
548	GO_Molecular_Function_2023__Bitter Taste Receptor Activity (GO:0033038)	0.490227	2.04983	0.00208333	0.0651862	0.934	12/16	25.66%	TAS2R7;TAS2R8;TAS2R9;TAS2R10;TAS2R31;TAS2R4;TAS2R19;TAS2R13;TAS2R46;TAS2R30;TAS2R50;TAS2R20	L3-5IT-1
549	GO_Biological_Process_2023__Negative Regulation Of Viral Genome Replication (GO:0045071)	0.35206	2.04923	0	0.0638661	0.934	15/41	12.78%	LTF;APOBEC3A;IFIH1;IFI16;PROX1;FAM111A;OAS2;APOBEC3G;OAS3;IFITM2;APOBEC3H;ISG20;CCL5;ZC3HAV1;IFITM3	L3-5IT-1
550	GO_Biological_Process_2023__Negative Regulation Of Blood Coagulation (GO:0030195)	-0.446983	-2.04754	0	0.0321863	0.937	14/22	19.11%	PDGFRA;PLAU;APOH;NOS3;CPB2;VTN;PLAT;PLG;KNG1;APOE;F12;SERPINE2;F2;EDN1	L3-5IT-1
551	GO_Biological_Process_2023__Regulation Of ERK1 And ERK2 Cascade (GO:0070372)	-0.24167	-2.04396	0	0.0328654	0.941	62/190	17.33%	ADRA1D;ANGPT1;SYK;PDGFRA;PTPRC;KDR;DUSP10;CCN2;DDT;GPNMB;PYCARD;DUSP4;NPNT;P2RY1;NOTCH1;DUSP6;NECAB2;CNKSR3;EMILIN1;SPRY1;IGF1;HTR2C;CHI3L1;ALKAL2;EGFR;MUSK;RRAS;CD4;LYN;P2RY6;CSF1R;DUSP29;PLA2G5;CD74;ERBB4;LGALS9;PDGFD;CIB1;DDR1;HTR2B;GCNT2;GSTP1;AGER;GPR183;PSCA;SPRED3;FGF1;PHB1;GPR55;ACKR3;HRAS;SPRED1;NELL1;APOE;MT3;BMP2;GLIPR2;SPRY2;NTRK1;RGS14;RAMP3;PDE8A	L3-5IT-1
552	WikiPathway_2023_Human__Oligodendrocyte Specification And Differentiation Leading To Myelin Components For CNS WP4304	-0.443265	-2.04168	0.00192308	0.0332456	0.941	13/23	17.76%	MOG;NKX2-2;SOX10;MAG;OLIG2;IGF1;PLP1;OLIG1;ASCL1;SOX8;MBP;BMP2;CNP	L3-5IT-1
553	MSigDB_Hallmark_2020__Inflammatory Response	0.238107	2.03883	0	0.0677037	0.945	51/156	14.56%	NPFFR2;ROS1;APLNR;IL18R1;ADM;MEFV;GP1BA;TLR2;CD70;TNFRSF1B;CSF3R;OPRK1;SERPINE1;ADORA2B;GNA15;MSR1;STAB1;CMKLR1;SELL;HAS2;F3;TLR1;TIMP1;TNFSF9;CSF1;CDKN1A;ICAM1;PTGER2;NLRP3;CCL5;IL15;PTGIR;EREG;LCP2;AXL;BEST1;IL1R1;CD40;LAMP3;C5AR1;RNF144B;FZD5;LCK;TACR1;GPC3;IRAK2;PLAUR;IL4R;IL15RA;KCNJ2;OSMR	L3-5IT-1
554	GO_Biological_Process_2023__B Cell Receptor Signaling Pathway (GO:0050853)	-0.42177	-2.03738	0.00184162	0.0340022	0.948	11/26	10.21%	SYK;VAV3;MNDA;PTPRC;BLK;TEC;BMX;BTK;NFATC2;NCKAP1L;BLNK	L3-5IT-1
555	KEGG_2021_Human__Olfactory transduction	0.278032	2.03633	0	0.0670744	0.946	38/95	16.17%	OR2V2;OR2AT4;OR1D2;OR2T6;OR2B11;OR7C1;ANO2;OR1A1;OR56A4;OR2T8;OR10H1;OR2G6;OR10H5;OR2T33;GUCY2D;OR2T7;CNGB1;OR2T2;OR10AC1;OR2T11;OR8D4;OR7D2;OR2AK2;CALML6;CNGA3;OR2T10;OR56A1;OR1B1;OR2L8;OR2AJ1;OR3A2;OR1F1;OR2L13;OR2M2;OR13A1;GNAL;OR2M3;OR1L8	L3-5IT-1
556	WikiPathway_2023_Human__Hematopoietic Stem Cell Differentiation WP2849	-0.362481	-2.03625	0.00378072	0.0340159	0.951	18/39	16.34%	IL1A;LYL1;STAT5A;IKZF1;NOTCH1;GYPA;LEF1;VAV1;LMO2;FOS;NFATC2;NCKAP1L;HES6;CD34;TRAF3IP3;KITLG;TRIM29;IRF5	L3-5IT-1
557	GO_Biological_Process_2023__Activation Of Phospholipase C Activity (GO:0007202)	-0.461209	-2.03561	0.00373134	0.0338555	0.952	13/21	20.86%	LPAR1;CD86;TXK;EGFR;EDNRA;P2RY6;HTR2B;PHB1;GPR55;P2RY12;SELE;PLCB2;PHB2	L3-5IT-1
558	GO_Molecular_Function_2023__Acetylcholine Receptor Activity (GO:0015464)	0.45452	2.0275	0.00205339	0.0699103	0.956	11/18	20.41%	CHRNA2;CHRNG;HRH4;CHRNA6;CHRNE;CHRNB4;CHRM2;HRH3;CHRNA5;CHRNA4;CHRM1	L3-5IT-1
559	KEGG_2021_Human__Staphylococcus aureus infection	-0.360327	-2.02597	0	0.0361199	0.96	17/39	10.52%	KRT19;C1QC;C3AR1;C3;KRT17;MASP1;C1R;HLA-DPB1;SELPLG;KRT10;ITGAM;SELP;HLA-DQA2;C1QB;FPR3;PLG;C1QA	L3-5IT-1
560	WikiPathway_2023_Human__Cholesterol Biosynthesis Pathway In Hepatocytes WP5329	-0.356721	-2.02359	0.00180832	0.0365524	0.96	30/40	42.01%	SCD;ABCA1;CYP27A1;ACOT1;TM7SF2;CH25H;ELOVL2;PLPP6;IDI1;EBP;PMVK;HMGCS1;CYP51A1;FDPS;SREBF1;HSD17B7;CYP46A1;ACOT2;MYLIP;DHCR24;NSDHL;ACAT2;MSMO1;MVK;FDFT1;ELOVL5;SC5D;MVD;HMGCR;ELOVL4	L3-5IT-1
561	GO_Biological_Process_2023__Ribosomal Large Subunit Assembly (GO:0000027)	-0.468641	-2.02158	0.00733945	0.0369025	0.962	13/19	29.70%	RPL10;DDX28;RRS1;RPL11;MRPL20;RPL23A;RPL6;RPLP0;NOP53;RPL5;TRAF7;PPAN;BRIX1	L3-5IT-1
562	GO_Biological_Process_2023__SMAD Protein Signal Transduction (GO:0060395)	0.344299	2.02079	0.0021322	0.0718482	0.962	21/41	22.28%	INHBC;ATOH8;NODAL;BMP4;LEFTY1;GDF15;BMP8B;BMP5;BMP3;GDF9;GDF5;MSTN;TGFB2;GDF7;TGFB3;TGFB1;INHA;ZMIZ2;SMAD9;SMAD3;ZMIZ1	L3-5IT-1
563	GO_Biological_Process_2023__Positive Regulation Of Angiogenesis (GO:0045766)	-0.272928	-2.0207	0	0.0368267	0.962	56/103	31.98%	IL1A;KDR;ETS1;ITGAX;RAMP2;HK2;S100A1;SMOC2;CCR3;JUP;ANXA3;VEGFC;ANGPTL3;SFRP2;EMILIN1;SEMA5A;PRKD1;CHI3L1;RRAS;HMGA2;NOS3;WNT5A;EMILIN2;PSG1;KLF4;HSPB6;FGF1;PIK3R6;MDK;CD34;NINJ1;PTGIS;FLT1;JMJD8;TNFSF12;HSPB1;VEGFB;THBS1;ECM1;CHRNA7;ITGA5;HYAL1;RHOB;GRN;SIRT6;XBP1;PDCL3;DLL1;PRKD2;PDCD6;MYDGF;EMC10;ZNF304;PKM;PRKCA;SASH1	L3-5IT-1
564	GO_Biological_Process_2023__Inorganic Anion Transport (GO:0015698)	0.334261	2.02068	0.00219298	0.0703249	0.962	25/46	27.50%	SLC5A8;SLC4A11;SLC17A1;SLC26A7;SLC4A1;SLC17A3;CLCN1;SLC5A5;GLRA1;BEST1;ENPP1;ANO7;SLC26A1;SLC26A6;SLC11A1;ENPP3;SLC26A11;CLIC5;SLC26A4;SLC26A8;TTYH3;SLC17A6;RACGAP1;ANO8;CLCN2	L3-5IT-1
565	GO_Biological_Process_2023__Mitochondrial Transport (GO:0006839)	-0.330187	-2.02045	0.00182815	0.0365482	0.962	28/53	31.21%	PMAIP1;SLC25A5;TSPO;TIMM8B;TOMM22;TIMM13;MGARP;TIMM10;BCS1L;FIS1;TOMM7;BAK1;TIMM17B;SLC25A4;AIP;TIMM17A;BAD;TOMM5;PPIF;HSP90AA1;TOMM20;PINK1;BNIP3;BCAP31;TOMM34;BCL2;DNAJC19;TOMM40	L3-5IT-1
566	GO_Biological_Process_2023__Substantia Nigra Development (GO:0021762)	-0.367623	-2.02018	0.00187266	0.0362926	0.963	21/38	31.73%	S100A1;PLP1;NDRG2;ATP5PF;COX6B1;DYNLL1;CALM2;CALM3;NDUFS3;GNB4;YWHAH;CNP;CALM1;HSPA5;PADI2;G6PD;SYNGR3;RHOA;CHKB;INA;ATP5PB	L3-5IT-1
567	GO_Molecular_Function_2023__Postsynaptic Neurotransmitter Receptor Activity (GO:0098960)	0.488172	2.01887	0.00417537	0.069783	0.967	10/16	18.46%	CHRNA2;CHRNG;CHRNA6;CHRNE;DRD4;DRD1;CHRNB4;CHRNA5;GRIA1;CHRNA4	L3-5IT-1
568	KEGG_2021_Human__Cardiac muscle contraction	-0.304472	-2.01885	0.00182815	0.0364057	0.965	29/71	20.88%	COX8A;COX7A1;COX6A1;COX5B;ACTC1;UQCR11;UQCRQ;CYC1;CACNG4;COX7C;COX7B;UQCR10;UQCRFS1;COX4I1;COX6B1;CACNA1F;COX7A2;TPM2;CACNA1S;CACNG5;CACNA2D4;UQCRB;COX5A;UQCRHL;ATP1A4;UQCRH;UQCRC1;COX6C;ATP1A3	L3-5IT-1
569	GO_Biological_Process_2023__Fc Receptor Mediated Stimulatory Signaling Pathway (GO:0002431)	-0.457055	-2.01819	0	0.036309	0.965	8/20	7.65%	SYK;MYO1G;VAV3;PLPP4;FCER1G;VAV1;LYN;NR4A3	L3-5IT-1
570	GO_Biological_Process_2023__Inflammatory Response (GO:0006954)	0.241062	2.01774	0	0.0688251	0.967	50/143	17.42%	PIK3CG;LTB4R;XCR1;PTGFR;ADM;MEFV;SIGLEC1;TLR2;AOC3;PTGDR;NFATC4;GGT5;CARD18;BDKRB2;FPR2;LYZ;PARP4;CMKLR1;CYBA;TLR4;F2R;CD44;TLR1;HRH4;ELF3;PTGER2;HSPG2;NLRP3;PTGER3;ADGRE5;CCL5;ALOX15;PTGIR;ACKR1;CD40;C5AR1;SCUBE1;TACR1;ITGB2;CD96;SLC11A1;TLR5;IRAK2;PIK3CD;CIITA;F11R;IL10RB;TNFSF4;AZU1;ADAM8	L3-5IT-1
571	GO_Biological_Process_2023__Mitochondrial Cytochrome C Oxidase Assembly (GO:0033617)	-0.457393	-2.01577	0	0.0367164	0.969	15/20	37.26%	COX14;PET117;COA3;SCO2;PET100;COX16;SURF1;COX17;FASTKD3;SMIM20;COA8;COX20;COA5;TMEM223;STMP1	L3-5IT-1
572	GO_Biological_Process_2023__Positive Regulation Of Signal Transduction By P53 Class Mediator (GO:1901798)	-0.441907	-2.00802	0.00376648	0.0387828	0.973	14/21	29.63%	PMAIP1;EIF5A;MYC;UBB;EEF1E1;RPS15;RPS7;SPRED1;HIC1;SPRED2;HEXIM1;RPS20;RPL37;RPL17	L3-5IT-1
573	GO_Biological_Process_2023__Aortic Valve Morphogenesis (GO:0003180)	-0.380469	-2.00725	0.00190114	0.0387054	0.974	14/32	13.59%	ROBO1;HEY2;TGFBR2;NOTCH1;EMILIN1;SMAD6;HEYL;NOS3;NPPA;CDH11;JAG1;HEY1;TIE1;ROBO2	L3-5IT-1
574	GO_Cellular_Component_2023__Germ Plasm (GO:0060293)	0.493911	2.00681	0	0.0726705	0.973	11/16	26.24%	TDRD1;PIWIL1;HELZ2;PIWIL3;EXD1;PIWIL2;MOV10L1;DDX3Y;PIWIL4;HENMT1;MAEL	L3-5IT-1
575	WikiPathway_2023_Human__Urea Cycle And Associated Pathways WP4595	-0.460325	-2.00373	0.00550459	0.0395763	0.975	16/20	40.50%	NAGS;LDHB;PYCR1;GPT;ARG1;ASS1;ALDH4A1;SLC25A15;GOT1;MDH2;MDH1;ASL;GLS2;OAT;FH;GOT2	L3-5IT-1
576	WikiPathway_2023_Human__Pluripotent Stem Cell Differentiation Pathway WP2848	0.359262	1.99971	0	0.0746575	0.975	20/36	19.57%	TPO;HGF;TNFSF11;FGF2;NODAL;BMP4;LEFTY1;CSF1;WNT7B;WNT2;IL11;FGF10;GDF5;IL6R;SHH;TGFB3;VEGFA;TF;ALK;TGFB1	L3-5IT-1
577	GO_Molecular_Function_2023__Sodium Channel Activity (GO:0005272)	0.371048	1.99807	0.00215054	0.0739897	0.976	18/34	25.32%	SCNN1A;SLC4A11;GRIK1;SCN5A;PKD2L1;SCNN1B;ASIC4;SCNN1D;HCN4;GRIK4;TRPM4;HCN3;GRIK5;SCN9A;ASIC2;SCN4B;SCN1A;HCN2	L3-5IT-1
578	WikiPathway_2023_Human__Translation Factors WP107	-0.341704	-1.99459	0.00194175	0.0421658	0.981	35/48	44.15%	EEF1B2;EIF5A;EIF3G;EIF1;GSPT2;EIF4A1;EIF6;EIF1AY;EIF4A2;EIF3I;EEF1A2;EEF1A1;EIF2B2;EIF5;EIF2B4;EEF2;EIF3D;EIF4G1;EIF2B5;EIF1AX;EIF3H;EEF1D;EIF3F;EIF2S2;EIF3B;EIF2AK1;ETF1;EIF4H;EIF3J;EIF2S1;EIF5B;EIF4EBP2;EIF4B;EIF3A;PAIP1	L3-5IT-1
579	MSigDB_Hallmark_2020__Myc Targets V2	-0.32434	-1.98803	0.003663	0.0442327	0.986	37/57	37.20%	DUSP2;HK2;MCM5;HSPE1;IPO4;MYC;DCTPP1;IMP4;NOC4L;NOP16;BYSL;EXOSC5;RRP9;WDR74;TBRG4;TMEM97;PA2G4;SRM;CDK4;MCM4;AIMP2;NDUFAF4;NIP7;PPAN;SLC29A2;FARSA;MYBBP1A;NOLC1;GNL3;PPRC1;PES1;RABEPK;MRTO4;NOP56;NPM1;MPHOSPH10;HSPD1	L3-5IT-1
580	GO_Biological_Process_2023__Regulation Of Oligodendrocyte Differentiation (GO:0048713)	-0.485572	-1.98204	0.00402414	0.0461659	0.989	11/17	22.86%	OPALIN;DAAM2;DRD3;NOTCH1;HES1;HES5;SLC45A3;MDK;PTPRZ1;ZNF365;IL34	L3-5IT-1
581	GO_Biological_Process_2023__Positive Regulation Of Tyrosine Phosphorylation Of STAT Protein (GO:0042531)	-0.378624	-1.97876	0.00179533	0.0469898	0.989	14/31	11.95%	HES1;TNFRSF1A;CLCF1;IGF1;IL23A;HES5;GHR;KIT;LYN;CSF1R;ERBB4;IL18;PARP14;CTF1	L3-5IT-1
582	KEGG_2021_Human__Autoimmune thyroid disease	0.419712	1.978	0.0040404	0.0840785	0.986	11/22	9.96%	TPO;HLA-DMB;HLA-DPA1;HLA-DQA1;HLA-DQB1;IL5;HLA-F;HLA-DRB1;CD40;HLA-DRA;TG	L3-5IT-1
583	GO_Molecular_Function_2023__Receptor Ligand Activity (GO:0048018)	0.219234	1.97645	0	0.0833505	0.986	69/192	17.58%	REG1A;INHBC;FAM3B;HGF;TNFSF11;SEMA3B;CD70;EPGN;METRNL;SEMA3A;FGF2;DEFB109B;DPP4;IL33;NODAL;BMP4;LEFTY1;OSGIN1;GDF15;C1QTNF12;ALKAL1;TIMP1;SEMA3F;FGF18;CSF1;BMP8B;WNT7B;WNT7A;ARTN;AMH;WNT2;CCL5;BMP5;IL15;FAM3D;IFNE;IL5;SEMA6A;EREG;WNT9B;BMP3;THPO;IL11;GDF9;WNT3;FGF17;WNT8A;FGF10;PSPN;EDA;LGALS3;LEP;PTN;SEMA7A;DLL4;GDF5;GREM2;MSTN;AGT;FGF7;ZP3;TGFB2;GDF7;SHH;PYY;TNFSF13B;TGFB3;VEGFA;EPHA7	L3-5IT-1
584	GO_Biological_Process_2023__Positive Regulation Of Chemotaxis (GO:0050921)	-0.380606	-1.97371	0.00548446	0.0484942	0.989	19/33	28.02%	KDR;SMOC2;RARRES2;SEMA5A;MET;PRKD1;TMSB4X;EDN3;P2RY12;MDK;NELL1;ZNF580;HSPB1;THBS1;PDGFRB;STX4;CDH13;PDGFB;PRKD2	L3-5IT-1
585	GO_Biological_Process_2023__Regulation Of Release Of Cytochrome C From Mitochondria (GO:0090199)	-0.361606	-1.97027	0.00362319	0.0494818	0.991	21/37	26.65%	AVP;PMAIP1;PYCARD;TNFSF10;IGF1;PRELID1;BID;TRIAP1;BAK1;MOAP1;HRK;CLU;BAD;BAX;PPIF;PSMD10;MLLT11;GHITM;PINK1;BNIP3;TP53	L3-5IT-1
586	WikiPathway_2023_Human__IL 24 Signaling Pathway WP5413	-0.227102	-1.96944	0	0.0493314	0.992	96/202	32.92%	KRT5;LORICRIN;PDGFRA;CD86;PTPRC;KDR;DNPH1;PMAIP1;COL6A2;MMP14;CCND1;TNFRSF10A;TNFRSF1A;VEGFC;NDUFA13;HSPE1;ELOB;EIF5A;MYC;EEF1E1;S100A2;FLG;EGFR;CDKN2A;ITGAM;MICA;GADD45G;CD82;S100A6;CDH1;FBP1;CD80;ABCG2;MST1;DDIT3;CDK1;FADD;CYCS;TMBIM4;ABCB1;CD34;MAP1LC3A;BAK1;GADD45A;SOX2;EIF4A1;HLA-C;SOD1;RPS6;H2AX;FAS;ATF4;HSPA5;TRADD;HSPB1;TXN;PPP1R15A;BIRC5;BAD;SIGMAR1;JUN;YKT6;BAX;CASP8;CD14;STAT1;NAA10;PC…	L3-5IT-1
587	GO_Biological_Process_2023__Respiratory Tube Development (GO:0030323)	0.424777	1.96893	0	0.0863877	0.99	14/22	24.82%	PROX1;BMP4;WNT7B;PCSK5;GLI2;FGF7;SHH;VEGFA;NPHP3;DNAAF1;CCDC39;CCDC40;PDPN;ITGA3	L3-5IT-1
588	GO_Biological_Process_2023__Fc-epsilon Receptor Signaling Pathway (GO:0038095)	-0.451171	-1.96849	0.00587084	0.0493484	0.992	7/21	7.65%	SYK;VAV3;PRKCQ;FCER1G;VAV1;LYN;NR4A3	L3-5IT-1
589	GO_Biological_Process_2023__Cell Chemotaxis (GO:0060326)	-0.366613	-1.96761	0.00371747	0.0493405	0.992	20/35	25.96%	LPAR1;PDGFRA;ARHGEF16;PRKCQ;LEF1;SEMA5A;KIT;CXCL12;CCN3;BIN2;RHOG;NELL1;ENC1;CORO1B;PRKCD;PDGFRB;HBEGF;HMGB2;NR4A1;PDGFB	L3-5IT-1
590	GO_Biological_Process_2023__Regulation Of B Cell Proliferation (GO:0030888)	-0.381395	-1.9664	0.00193798	0.0493735	0.993	12/31	9.93%	VAV3;MNDA;PTPRC;CD22;CLCF1;SASH3;LYN;CD74;NFATC2;NCKAP1L;IL7;GPR183	L3-5IT-1
591	KEGG_2021_Human__Salmonella infection	-0.217588	-1.96096	0	0.0511697	0.994	94/233	29.32%	PTPRC;MYL9;PYCARD;PIK3C2G;TNFSF10;TNFRSF10A;TUBB2A;TNFRSF1A;CASP1;PFN1;S100A10;RAB7B;MYC;LEF1;GAPDH;FLNC;MYL12A;RRAS;MLKL;TUBA1A;TLR6;GSDMD;TCF7L1;FOS;TUBA4A;NCKAP1L;RILP;IL18;DCTN3;MYL7;MYL12B;DYNLL1;FADD;CYCS;HRAS;RHOG;PFN4;DYNLRB1;BAK1;MYL5;TUBB3;TUBA1B;ARPC5;ARPC4;IRAK1;TUBB4B;ARPC3;ARPC5L;TUBB2B;DYNLT3;HSP90AB1;TRADD;PFN2;TXN;ARPC1B;ARPC1A;TUBB6;ACTG1;NLRC4;JUN;DCTN6;TUBB;BAX;CASP8;CD14;TUBB…	L3-5IT-1
592	GO_Biological_Process_2023__Negative Regulation Of Viral Process (GO:0048525)	0.324118	1.95923	0.00214133	0.0909327	0.992	14/47	7.92%	LTF;APOBEC3A;IFIH1;IFI16;PROX1;FAM111A;OAS2;APOBEC3G;OAS3;ZFP36;IFITM2;APOBEC3H;ISG20;CCL5	L3-5IT-1
593	GO_Cellular_Component_2023__U12-type Spliceosomal Complex (GO:0005689)	-0.40889	-1.95597	0.00194553	0.0528444	0.994	16/25	33.06%	SF3B5;SNRNP25;SNRPD2;LSM7;SF3B4;SNRPB;SF3B6;SNRPE;ZCRB1;YBX1;ZMAT5;SNRPD3;SNRPG;SNRNP35;PHF5A;SF3B2	L3-5IT-1
594	GO_Biological_Process_2023__Response To Type II Interferon (GO:0034341)	0.3165	1.95401	0.00209205	0.0929111	0.994	21/48	18.70%	GBP5;MEFV;GBP6;TLR2;CXCL16;HLA-DPA1;TLR4;GBP1;IL23R;IFITM2;SP100;CCL5;CD40;SLC26A6;SLC11A1;IFITM3;GBP4;AQP4;CIITA;GCH1;DAPK1	L3-5IT-1
595	WikiPathway_2023_Human__Glycolysis And Gluconeogenesis WP534	-0.350564	-1.9512	0.00352113	0.054392	0.994	24/39	33.26%	SLC2A2;SLC2A5;HK2;FBP2;GAPDH;TPI1;LDHB;GCK;FBP1;LDHA;PGAM1;ALDOC;ALDOA;ENO2;GOT1;MDH2;SLC2A1;ENO1;MPC2;PFKL;MDH1;PKM;PGK1;SLC2A3	L3-5IT-1
596	WikiPathway_2023_Human__Development Of Ureteric Collection System WP5053	0.32074	1.95073	0.00223714	0.0935956	0.994	21/49	17.84%	VANGL2;HNF1B;FREM2;FAT4;GLI3;BMP4;GFRA1;LHX1;PAX2;GREB1L;BMP5;GRIP1;ITGA8;RARG;GPC3;GLI2;SMO;RARA;TGFB2;SHH;RET	L3-5IT-1
597	GO_Cellular_Component_2023__Golgi Lumen (GO:0005796)	0.285733	1.94908	0	0.0930686	0.994	25/72	12.65%	GPC2;SOD3;SDC4;MUC4;MMP11;SDC1;MUC3A;AGRP;PROC;PRELP;MUC20;GPC5;MUC5B;WNT7B;HSPG2;WNT7A;MUC19;PROZ;F10;MUC15;PCSK5;WNT3;F7;GPC3;RHBDF2	L3-5IT-1
598	GO_Biological_Process_2023__Positive Regulation Of Neuron Differentiation (GO:0045666)	-0.357538	-1.94849	0.00375235	0.0552687	0.994	19/36	28.55%	SOX11;DLX1;PCP4;FGF20;HEYL;NGF;GPRC5B;ADRA2C;ASCL1;NBL1;BMP2;REST;FGFR1;MMD2;BRINP2;VWC2;MMD;RHOA;BRINP3	L3-5IT-1
599	GO_Biological_Process_2023__Aortic Valve Development (GO:0003176)	-0.355571	-1.94631	0.00380952	0.0557321	0.994	15/35	15.60%	ROBO1;HEY2;TGFBR2;NOTCH1;TNFRSF1A;EMILIN1;SMAD6;HEYL;NOS3;NPPA;JAG1;HEY1;TIE1;ROBO2;BMP2	L3-5IT-1
600	KEGG_2021_Human__Kaposi sarcoma-associated herpesvirus infection	-0.238242	-1.94629	0	0.0553529	0.994	55/159	21.15%	SYK;CD86;GNG3;C3;CCND1;CCR3;RPS27A;GNG13;TNFRSF1A;IRF7;GNG4;PIK3R5;MYC;LEF1;UBB;HLA-E;GNG11;MICA;LYN;GNGT1;TCF7L1;GNG8;FOS;NFATC2;GABARAPL2;UBA52;GABARAP;PTGS2;ANGPT2;FADD;CYCS;CALM2;HRAS;HLA-A;PIK3R3;PIK3R6;BID;HLA-B;BAK1;RCAN1;CALM3;HLA-C;CALML4;UBC;GNB4;IRF3;PIK3R2;CALM1;FAS;TRADD;JUN;GNG10;BAX;CASP8;STAT1	L3-5IT-1
601	GO_Biological_Process_2023__Negative Regulation Of Peptide Hormone Secretion (GO:0090278)	-0.46339	-1.94399	0	0.0558716	0.994	12/17	32.79%	CRH;FOXO1;SFRP1;CRHBP;CCN3;REST;MIDN;KCNJ11;SIRT4;BMP8A;FFAR4;CHGA	L3-5IT-1
602	GO_Biological_Process_2023__Regulation Of Interleukin-1 Beta Production (GO:0032651)	-0.303097	-1.94192	0.00183824	0.0563678	0.994	29/62	21.81%	CX3CR1;MNDA;PYCARD;CD33;CASP1;PYDC1;IGF1;INAVA;LILRA2;WNT5A;TLR6;GSDMD;LGALS9;ELF4;TNFAIP3;PYHIN1;GSTP1;GHRL;LCP1;CPTP;USP50;SERPINB1;NLRP7;CARD8;EGR1;HSPB1;NLRC4;CASP8;PANX1	L3-5IT-1
603	WikiPathway_2023_Human__Markers Of Kidney Cell Lineage WP5236	-0.326953	-1.94158	0	0.0561682	0.994	20/46	16.71%	KDR;SFRP1;SALL1;TNC;NOTCH1;OSR1;KIT;RSPO3;WNT5A;FGF8;JAG1;WNT4;REN;ALDH1A2;BMP7;DCN;NT5E;NPHS1;EYA1;ACTA2	L3-5IT-1
604	GO_Biological_Process_2023__Negative Regulation Of Cell Population Proliferation (GO:0008285)	-0.2061	-1.94072	0	0.0561081	0.994	93/326	17.23%	SST;ADRA1D;MYOCD;IL1A;CLDN3;INSM1;ST18;AZGP1;ETS1;DUSP10;VIP;GPNMB;SFRP1;SOX11;TRIB1;MYO16;PLAAT4;CD33;NOX4;INHBA;NOTCH1;HES1;SCIN;TMIGD3;ATF5;SFRP2;MYC;BMPR1B;SMAD6;EEF1E1;TES;H2AC8;S100A11;DHRS2;SFRP4;CDKN2A;PER2;GREM1;SH3BP4;LYN;NOS3;WNT5A;TENT5B;RFPL1;NME1;FABP6;WNT9A;ERBB4;NGF;NUPR2;TNFAIP3;CIB1;PLXNB1;RERG;CCN3;GSTP1;RGCC;PTHLH;FTH1;ADAMTS1;FOXP3;PLG;FOXO4;DYNLL1;ALDH1A2;SOX4;APOD;PHB1;HRAS…	L3-5IT-1
605	MSigDB_Hallmark_2020__Pancreas Beta Cells	-0.378926	-1.93779	0.00559701	0.0569407	0.994	12/30	14.72%	SST;INSM1;SLC2A2;NKX2-2;FOXO1;VDR;MAFB;LMO2;GCK;SRP14;SPCS1;PCSK1	L3-5IT-1
606	WikiPathway_2023_Human__GPCRs Class A Rhodopsin Like WP455	-0.241456	-1.9373	0	0.0567638	0.994	51/143	15.34%	ADRA1D;HCRTR1;CX3CR1;HTR4;GPR20;NPBWR1;GPR65;GPR6;C3AR1;TBXA2R;OR2H2;DRD3;P2RY1;OR5V1;OR2D2;CCR3;GPR3;OR11A1;GALR3;GPR18;GPR37;HTR2C;CNR1;EDNRA;P2RY13;OR2AG1;P2RY6;GPR171;C5AR2;EDNRB;ADRA1A;HTR2B;CCR9;FPR3;CYSLTR1;RGL4;P2RY14;GPR37L1;GPR34;ACKR3;ADRA2C;P2RY12;NTSR2;GALR1;FPR1;GPR87;OR3A3;SSTR1;NPFFR1;OR6A2;GPR75	L3-5IT-1
607	KEGG_2021_Human__Alcoholism	-0.253217	-1.93638	0.00181818	0.0568278	0.996	41/121	19.01%	NPY;CRH;GNG3;H4C3;H2BC11;H4C4;H3C6;GNG13;GNG4;SHC4;H2AC8;BDNF;GNG11;GNGT1;H2BC21;GNG8;H2AZ1;H2BC15;GRIN3A;H2AC20;H2BC4;CALM2;SLC18A2;H4C5;HRAS;H3C1;GRIN2C;CALM3;CREB3L1;CALML4;CREB5;GNB4;H4C8;H3-3B;H2AX;CALM1;ATF4;HDAC10;CREB3;HDAC1;H2AC6	L3-5IT-1
608	GO_Cellular_Component_2023__Caveola (GO:0005901)	-0.305641	-1.93551	0	0.0568614	0.996	21/60	14.93%	TGFBR2;CAVIN3;ADTRP;PLPP2;CAV1;KCNA5;NOS3;RANGRF;CAVIN2;CDH1;EHD2;SMPD2;DYNLL1;MYOF;PLVAP;CAVIN1;FXYD1;CAV3;CAV2;PTGIS;SELE	L3-5IT-1
609	GO_Biological_Process_2023__Negative Regulation Of Cytokine Production (GO:0001818)	-0.24063	-1.92278	0	0.0621525	0.997	41/141	13.86%	CIDEA;PSG4;PTPRC;CD84;GPNMB;TRIB2;HOMER3;LAPTM5;LILRB1;PYCARD;RNF125;CD33;INHBA;ELANE;ANXA1;LEF1;IL23A;XAF1;BANF1;C5AR2;TLR6;KLF4;TMSB4X;LGALS9;SIGIRR;ELF4;TNFAIP3;NCKAP1L;RGCC;AGER;NMB;FOXP3;DDIT3;GHRL;APOD;C1QBP;BCL3;CD34;PDCD1LG2;SRGN;ADCY7	L3-5IT-1
610	GO_Biological_Process_2023__Regulation Of T Cell Mediated Cytotoxicity (GO:0001914)	0.381961	1.92124	0.00632911	0.109626	0.999	12/26	11.57%	ULBP1;MICB;HFE;RAET1G;IL23R;KLRC1;RAET1E;ULBP2;HLA-F;HLA-DRB1;HLA-DRA;KLRD1	L3-5IT-1
611	GO_Biological_Process_2023__Phospholipase C-activating G Protein-Coupled Receptor Signaling Pathway (GO:0007200)	0.291334	1.92051	0.00438596	0.108363	0.999	23/59	13.28%	NMUR2;DRD2;LTB4R;ANO1;OPRK1;FPR2;GNA15;CMKLR1;ADRA2A;F2R;GPR157;TRHR;PTGER3;TGM2;DRD1;GPR83;C5AR1;GPR35;NMBR;ESR1;TACR1;CHRM2;OPRD1	L3-5IT-1
612	WikiPathway_2023_Human__Complement Activation WP545	-0.489223	-1.91975	0.00948767	0.0630957	0.997	8/15	10.52%	C1QC;C3;MASP1;C1R;C7;CD55;C1QB;C1QA	L3-5IT-1
613	GO_Biological_Process_2023__Detection Of Chemical Stimulus Involved In Sensory Perception Of Bitter Taste (GO:0001580)	0.402682	1.91889	0.00421053	0.107669	1	14/23	21.13%	CA6;TAS2R7;TAS2R8;TAS2R9;TAS2R1;RTP5;TAS2R10;TAS2R31;TAS2R4;TAS2R19;TAS2R13;TAS2R46;TAS2R30;TAS2R50	L3-5IT-1
614	KEGG_2021_Human__Retrograde endocannabinoid signaling	-0.241599	-1.91881	0.00374532	0.0630889	0.998	58/138	29.21%	NDUFA7;GNG3;NDUFA4;GABRQ;NDUFB11;GNG13;NDUFA13;NDUFA6;NDUFB8;GNG4;NDUFA11;CNR1;NDUFB10;GNG11;NDUFA2;GNGT1;NDUFA1;GNG8;NDUFB7;NDUFA3;NDUFAB1;NDUFC2;CACNA1F;NDUFB9;CACNA1S;PTGS2;GABRR1;NDUFB2;NDUFS5;NDUFB3;ADCY8;GABRG1;NDUFA8;ADCY7;NDUFA4L2;NDUFS3;GNB4;PLCB2;NDUFB5;NDUFS7;GRM1;NDUFA12;NDUFS6;GNG10;PRKCG;MAPK12;NDUFV2;NDUFS8;NDUFB4;NDUFC1;GNB2;GABRD;GNG7;NDUFS2;NDUFV1;SLC17A7;PLCB1;NDUFA9	L3-5IT-1
615	WikiPathway_2023_Human__Allograft Rejection WP2328	-0.315945	-1.91755	0.00184502	0.0632774	0.998	25/53	21.15%	IL1A;PDGFRA;CD86;C1QC;C3;C7;HLA-E;HLA-DPB1;CD55;MICA;CXCL12;HLA-DQA2;C1QB;FOXP3;CD80;C1QA;HLA-A;ABCB1;HLA-B;TUBA1B;HLA-C;FAS;COL5A1;CASP8;STAT1	L3-5IT-1
616	GO_Biological_Process_2023__Long-Chain Fatty Acid Metabolic Process (GO:0001676)	0.281189	1.91716	0.00246305	0.10697	1	22/68	13.84%	PLA2G10;RAPSN;CYP4F2;ELOVL3;SLC27A3;CYP4F11;PLA2G4A;ALOX12B;GSTM2;CYP1B1;ALOX15B;ALOX12;ALOX15;LTC4S;ALOXE3;CYP4A22;CPT1A;CYP3A4;CYP4A11;ACSBG1;ASAH2;ACSBG2	L3-5IT-1
617	GO_Biological_Process_2023__Positive Regulation Of MAPK Cascade (GO:0043410)	-0.214968	-1.91521	0	0.063923	0.998	94/240	24.51%	ADRA1D;LPAR1;ANGPT1;ART4;PDGFRA;PTPRC;KDR;ROBO1;CCN2;DDT;GPNMB;LAPTM5;PYCARD;NPNT;P2RY1;NOTCH1;ELANE;NECAB2;PIK3R5;GPR37;IGF1;INAVA;GHR;HTR2C;CHI3L1;ALKAL2;EGFR;MUSK;EGF;KIT;CD4;P2RY6;CSF1R;PLA2G5;CD74;ERBB4;LGALS9;PDGFD;CIB1;DDR1;PPIA;HTR2B;GCNT2;AGER;EDN3;GPR183;TGFA;GPR37L1;FGF1;GHRL;PHB1;GPR55;ACKR3;ADRA2C;HRAS;PIK3R6;CD24;CAV2;IGFBP6;NELL1;FLT1;APOE;SOX2;MT3;SOD1;MST1R;BMP2;GLIPR2;SPRY2;IRAK…	L3-5IT-1
618	GO_Biological_Process_2023__Ventricular Septum Development (GO:0003281)	-0.378309	-1.91381	0.00549451	0.064211	0.998	12/30	13.59%	ROBO1;HEY2;SOX11;TGFBR2;SALL1;NOTCH1;HES1;HEYL;SOX4;DAND5;HEY1;ROBO2	L3-5IT-1
619	GO_Biological_Process_2023__Negative Regulation Of MAPK Cascade (GO:0043409)	-0.265353	-1.91104	0.00178253	0.0650768	0.998	42/96	26.97%	PTPRC;DUSP10;FOXO1;DUSP2;DUSP4;DUSP6;SPRY4;CNKSR3;EMILIN1;MYC;SPRY1;CAV1;LYN;DUSP29;PPIA;GSTP1;PSCA;SPRED3;DUSP5;CBLC;CAV3;PHB1;BMP7;SPRED1;PEBP1;APOE;DUSP1;BMP2;HYAL2;SPRY2;RGS14;PIK3R2;SPRED2;PRKCD;SMPD1;PSMD10;QARS1;UCHL1;RGS2;DUSP16;DUSP7;GBA1	L3-5IT-1
620	GO_Molecular_Function_2023__Monoatomic Anion Transmembrane Transporter Activity (GO:0008509)	0.416906	1.90957	0.00195695	0.108761	1	13/21	27.30%	SLC26A7;SLC4A1;SLC26A3;SLC5A5;SLC26A1;SLC26A6;CFTR;SLC19A1;SLC26A11;SLC26A4;SLC26A8;LRRC8A;SLC39A14	L3-5IT-1
621	WikiPathway_2023_Human__Proteasome Degradation WP183	-0.303104	-1.90888	0	0.0656854	0.998	39/59	42.25%	PSMB6;UBB;HLA-E;H2AZ1;PSMC3;PSME2;PSME1;PSMC5;HLA-A;PSMB10;HLA-B;PSMD8;UCHL3;HLA-C;UBC;PSMB3;H2AX;PSMA7;PSMD10;PSMB5;UCHL1;PSMB4;PSMA4;PSMC4;PSMD2;PSMD7;PSMD3;PSMD4;PSMD6;PSME3;PSMA6;PSMC1;UBE2D1;PSMA5;RPN1;PSMB1;PSMA3;PSMB2;PSMD13	L3-5IT-1
622	KEGG_2021_Human__Taste transduction	0.287595	1.90886	0.00436681	0.107468	1	32/66	25.66%	SCNN1A;HTR1B;TAS2R7;TAS2R8;ADCY4;TAS2R9;TAS2R1;PLCB3;PKD2L1;ENTPD2;HTR1A;SCNN1B;TAS2R10;TAS2R31;HCN4;HTR1F;TAS2R4;TAS2R19;PKD1L3;ITPR3;TAS2R13;TAS2R46;HTR1E;TAS2R30;GNB3;TAS2R50;SCN9A;ASIC2;GABRA6;ADCY6;CACNA1A;TAS2R20	L3-5IT-1
623	GO_Biological_Process_2023__Oxoacid Metabolic Process (GO:0043436)	0.424826	1.90873	0.00212314	0.105915	1	11/21	21.71%	SULT1C3;SULT1A2;AMH;SULT2A1;SULT1B1;ENPP1;LIPT1;SULT2B1;SULT1A3;SULT1A1;MTARC1	L3-5IT-1
624	GO_Biological_Process_2023__Protein Transmembrane Import Into Intracellular Organelle (GO:0044743)	-0.369901	-1.90733	0.00359712	0.0661115	0.998	22/32	40.38%	DNLZ;ROMO1;TOMM20L;TIMM17B;PAM16;PEX12;TIMM17A;TOMM20;CHCHD4;GRPEL1;TOMM40L;GRPEL2;PEX16;PEX10;TIMM50;DNAJC19;TOMM40;TIMM44;HSPD1;PEX6;PEX2;DNAJC15	L3-5IT-1
625	GO_Biological_Process_2023__Myelination (GO:0042552)	-0.329544	-1.90678	0.00582524	0.0659963	0.998	24/45	32.86%	MAL;SOX10;MYRF;MALL;KLK6;BCAS1;PARD3;PLP1;HES5;PLLP;CMTM8;HYCC1;AMIGO1;MPZ;ARHGEF10;PMP22;MAL2;EIF2B2;EIF2B4;SLC8A3;GPC1;DEGS1;EIF2B5;ABCD2	L3-5IT-1
626	GO_Biological_Process_2023__Respiratory Chain Complex IV Assembly (GO:0008535)	-0.408415	-1.90618	0.00383142	0.0658893	0.998	18/24	41.10%	COX14;PET117;COA3;SCO2;PET100;COX16;SURF1;COX17;FASTKD3;SMIM20;COA8;COX20;COA5;TMEM223;COX15;STMP1;COX10;SCO1	L3-5IT-1
627	GO_Biological_Process_2023__Negative Regulation Of Mitotic Cell Cycle Phase Transition (GO:1901991)	-0.340375	-1.89934	0.00560748	0.0688174	0.998	13/38	14.47%	GPNMB;SLFN11;MYO16;INHBA;ZFP36L2;RFPL1;KLF4;ZFP36L1;RGCC;DACT1;GPR132;CDK2AP2;USP44	L3-5IT-1
628	GO_Biological_Process_2023__Muscle Contraction (GO:0006936)	0.269653	1.89746	0	0.11302	1	30/78	19.23%	LTB4R;DES;CHRNG;BDKRB2;MYH7;CLCN1;CASQ2;CACNA1H;TACR2;ANKRD2;TRDN;SNTB1;SCN7A;CHRNE;LMOD1;GLRA1;MYH11;MYL11;OXTR;LMOD3;MYH3;KLHL41;GJC1;HCN4;MYOM2;RYR1;TNNT2;MYLK;KCNIP2;NOS1	L3-5IT-1
629	WikiPathway_2023_Human__Hair Follicle Development Cytodifferentiation Part 3 Of 3 WP2840	-0.295956	-1.89736	0.00190114	0.0692898	0.998	24/64	16.23%	EGR2;KRT19;CCN2;SFRP1;NOTCH1;ELANE;SPINK6;KLK6;LEF1;IGF1;GPRC5D;EGFR;BMP6;WNT5A;ADAMTS20;FOS;WIF1;KLK7;BCL11B;CD34;SOX2;TP63;KITLG;DSC2	L3-5IT-1
630	GO_Molecular_Function_2023__G Protein-Coupled Receptor Binding (GO:0001664)	-0.249708	-1.89516	0	0.0699403	0.998	33/106	15.26%	GNAT3;PENK;NPB;CORT;S1PR2;SFRP1;HOMER3;POMC;WNT3A;BAMBI;PNOC;WNT6;FZD7;WNT8B;HSPA8;UTS2B;WNT5A;CXCL12;NPPA;WNT9A;GPRC5B;WNT4;STUB1;PSMC5;GHRL;PHB1;GPHB5;C1QBP;FPR1;RTP1;NPW;HSPA1A;GNAT2	L3-5IT-1
631	WikiPathway_2023_Human__Microglia Pathogen Phagocytosis Pathway WP3937	-0.356106	-1.89359	0.00722022	0.0702654	0.998	16/33	19.76%	SYK;VAV3;C1QC;FCER1G;VAV1;CYBB;ITGAM;LYN;C1QB;NCKAP1L;C1QA;PIK3R3;PIK3R6;RAC3;PIK3R2;ARPC1B	L3-5IT-1
632	GO_Biological_Process_2023__Regulation Of Actin Cytoskeleton Organization (GO:0032956)	-0.274326	-1.89278	0	0.0702173	0.998	33/84	22.48%	PDGFRA;DAAM2;SLC4A2;PEAK3;SEMA3E;EPHA5;SMIM22;ARHGDIB;BST2;EPHA3;CSF1R;DYNLL1;CELSR1;HRAS;MYO3A;RHOG;MDK;NEDD9;GRHL3;RAC3;HAX1;EPS8;CORO1A;ESAM;SIGLEC15;SH3BP1;CARMIL2;TWF2;CLU;PRKCD;PDGFRB;RNH1;FSCN1	L3-5IT-1
633	GO_Biological_Process_2023__Positive Regulation Of Lymphocyte Activation (GO:0051251)	0.344979	1.88931	0.00225225	0.117536	1	15/34	18.19%	TNFSF11;HLA-DMB;CLEC7A;HLA-DPA1;HLA-DQA1;SIRPG;HLA-DRB1;HLA-DRA;LCK;FGF10;TICAM2;CCDC88B;TNIP2;TNFSF4;HLA-DMA	L3-5IT-1
634	KEGG_2021_Human__Breast cancer	-0.240574	-1.88815	0	0.071723	0.998	39/132	14.61%	HEY2;NOTCH1;WNT3A;CCND1;HES1;FGF20;MYC;WNT6;LEF1;FZD7;WNT8B;IGF1;HEYL;HES5;SHC4;EGFR;EGF;KIT;FGF6;WNT5A;GADD45G;FGF8;TCF7L1;WNT9A;FOS;JAG1;WNT4;FZD9;FGF1;FRAT2;DLL3;NOTCH3;HRAS;PIK3R3;GADD45B;HEY1;NOTCH4;BAK1;GADD45A	L3-5IT-1
635	GO_Biological_Process_2023__Negative Regulation Of Ossification (GO:0030279)	-0.434897	-1.88511	0.00570342	0.0727501	0.998	10/19	21.31%	SFRP1;NOTCH1;SMAD6;KREMEN2;LRP4;GREM1;MDK;SRGN;FGF23;ECM1	L3-5IT-1
636	GO_Biological_Process_2023__Positive Regulation Of Cytokine-Mediated Signaling Pathway (GO:0001961)	-0.33664	-1.8832	0.00369686	0.0732731	0.998	15/37	14.53%	STING1;TXK;LAPTM5;CASP1;WNT5A;TRIM56;CD300LF;CD74;IL7;C1QTNF4;FADD;PARP14;USP27X;RBM47;HSPA1A	L3-5IT-1
637	GO_Biological_Process_2023__Positive Regulation Of Vasculature Development (GO:1904018)	-0.265736	-1.88249	0	0.0731114	0.998	45/89	29.30%	IL1A;KDR;ETS1;ITGAX;RAMP2;HK2;SMOC2;CCR3;JUP;ANXA3;VEGFC;ANGPTL3;SFRP2;EMILIN1;SEMA5A;PRKD1;CHI3L1;RRAS;HMGA2;NOS3;WNT5A;EMILIN2;PSG1;HSPB6;FGF1;PIK3R6;CD34;NINJ1;PTGIS;FLT1;TNFSF12;HSPB1;VEGFB;THBS1;ECM1;CHRNA7;HYAL1;RHOB;GRN;XBP1;PDCL3;PRKD2;PDCD6;MYDGF;EMC10	L3-5IT-1
638	MSigDB_Hallmark_2020__Angiogenesis	-0.375652	-1.88098	0.00390625	0.0734382	0.998	12/28	14.01%	COL3A1;VCAN;SLCO2A1;OLR1;APOH;KCNJ8;SPP1;LPL;JAG1;VTN;PGLYRP1;COL5A2	L3-5IT-1
639	GO_Biological_Process_2023__Fc Receptor Signaling Pathway (GO:0038093)	-0.407113	-1.88047	0.00753296	0.0733741	0.998	7/23	6.40%	SYK;VAV3;PRKCQ;FCER1G;VAV1;KIT;LYN	L3-5IT-1
640	GO_Biological_Process_2023__Regulation Of Endothelial Cell Proliferation (GO:0001936)	-0.261906	-1.88041	0.00353357	0.0730156	0.998	41/82	29.30%	ANGPT1;KDR;VIP;STAT5A;VEGFC;SEMA5A;PRKD1;APOH;EGF;CAV1;WNT5A;HTR2B;ALOX5;RGCC;ATP5IF1;GHRL;SPARC;TIE1;CAV2;NELL1;APOE;BMP2;ZNF580;TNFSF12;EGFL7;VEGFB;THBS1;STAT1;ECM1;FUT2;HMGB2;NR4A1;CDH13;VASH1;PDGFB;PDCL3;ATP5F1A;PRKD2;PDCD6;MYDGF;EMC10	L3-5IT-1
641	GO_Molecular_Function_2023__Proton Transmembrane Transporter Activity (GO:0015078)	-0.339346	-1.87958	0.00952381	0.0729865	0.998	16/37	18.73%	COX8A;COX7A1;COX5B;COX7C;ATP6V1F;COX7B;UQCR10;COX4I1;COX6B1;MFSD3;SLC18A2;UQCRB;COX5A;UQCRHL;UQCRH;UQCRC1	L3-5IT-1
642	KEGG_2021_Human__Intestinal immune network for IgA production	0.378987	1.87863	0.00211864	0.121382	1	15/26	19.77%	HLA-DMB;HLA-DPA1;HLA-DQA1;HLA-DQB1;IL15;IL5;HLA-DRB1;CD40;HLA-DRA;IL15RA;TNFSF13B;HLA-DMA;ITGA4;TGFB1;MADCAM1	L3-5IT-1
643	KEGG_2021_Human__Melanoma	-0.28641	-1.87774	0	0.0734401	0.998	30/66	26.65%	PDGFRA;CCND1;FGF20;IGF1;MET;EGFR;EGF;CDKN2A;FGF6;GADD45G;FGF8;PDGFD;CDH1;FGF1;HRAS;PIK3R3;GADD45B;BAK1;GADD45A;FGF22;PIK3R2;FGF23;FGFR1;BAD;PDGFRB;BAX;CDK4;ARAF;PDGFB;TP53	L3-5IT-1
644	KEGG_2021_Human__Rheumatoid arthritis	0.288039	1.87717	0.00222717	0.120991	1	26/60	19.57%	ATP6V0A4;TNFSF11;TLR2;HLA-DMB;HLA-DPA1;HLA-DQA1;HLA-DQB1;LTB;TLR4;CSF1;ICAM1;ATP6V0D2;ACP5;CCL5;IL15;HLA-DRB1;HLA-DRA;IL11;ITGB2;TGFB2;TNFSF13B;TGFB3;VEGFA;HLA-DMA;TEK;TGFB1	L3-5IT-1
645	GO_Molecular_Function_2023__Sequence-Specific DNA Binding (GO:0043565)	0.177847	1.8771	0	0.119357	1	171/498	24.34%	LMX1B;TBX2;FIGLA;EMX2;NHLH2;HLX;ZIC1;PTF1A;TBX6;HES7;TBX1;RORC;NFATC4;POU2F3;PROX1;SNAI2;TBX19;ZIC4;ZNF300;STON1;MAF;SOX13;DRGX;RXRG;FOXF2;DMRTA2;SIX4;PAX6;GLI3;DPEP1;ZNF296;ADRA2A;PRRX2;SNAI1;TBX15;MYBL2;FOXA3;DMRT3;TFCP2L1;NR2E3;FLI1;DLX4;ETV7;MBD3L3;ZNF501;MEOX2;ELF3;E2F7;NR1I3;IRF4;MEOX1;GRHL2;PAX3;RHOXF1;LHX1;NLRP3;RHOXF2;POU3F1;TFEC;CREB3L4;NHLH1;IKZF3;PAX2;SKOR1;PAX8;FOXH1;MNX1;GCM2;SCRT2;…	L3-5IT-1
646	GO_Biological_Process_2023__Positive Regulation Of Activated T Cell Proliferation (GO:0042104)	-0.479365	-1.87254	0	0.0753744	0.999	9/15	18.58%	PYCARD;IGF1;IL23A;IL18;ICOSLG;FADD;CD24;IGFBP2;IL12RB1	L3-5IT-1
647	GO_Molecular_Function_2023__Histone Demethylase Activity (GO:0032452)	0.372416	1.87176	0.0043956	0.122172	1	22/27	48.26%	RIOX1;HR;KDM6B;KDM4D;KDM8;KDM5C;UTY;RIOX2;KDM5D;KDM4A;KDM2B;JMJD6;KDM3B;KDM4B;KDM2A;KDM1B;KDM3A;PHF8;KDM5B;KDM1A;KDM6A;KDM5A	L3-5IT-1
648	GO_Biological_Process_2023__Positive Regulation Of Monoatomic Ion Transport (GO:0043270)	0.343023	1.87077	0	0.119913	1	15/33	23.96%	ADRA2A;F2R;SCN5A;TRPC6;PKP2;CCL5;DRD1;ORAI1;CRACR2A;MYLK;CHRM1;WFS1;P2RX7;P2RX4;SCN4B	L3-5IT-1
649	GO_Molecular_Function_2023__Translation Initiation Factor Activity (GO:0003743)	-0.331656	-1.87039	0.00198413	0.0758636	0.999	30/41	45.52%	EIF2S3B;EIF3G;EIF1;EIF4A1;EIF6;EIF1AY;EIF4A2;EIF1B;EIF3I;EIF4G2;EIF2B2;EIF5;EIF2B4;EIF3D;EIF4G1;COPS5;EIF2B5;EIF3K;EIF1AX;EIF3H;EIF3F;EIF2S2;MTIF3;EIF3M;EIF3B;EIF3J;EIF2S1;EIF5B;EIF4E2;EIF4E	L3-5IT-1
650	GO_Biological_Process_2023__Regulation Of Protein Neddylation (GO:2000434)	-0.44719	-1.87013	0.00769231	0.0755855	0.999	15/18	45.55%	COPS9;RPL11;EPAS1;COPS6;COPS7A;RPL5;GPS1;COPS8;DCUN1D3;COPS5;COPS3;COPS4;DCUN1D5;HIF1A;DCUN1D1	L3-5IT-1
651	MSigDB_Hallmark_2020__Reactive Oxygen Species Pathway	-0.320813	-1.87006	0.00185529	0.075212	0.999	24/47	27.30%	GPX4;NDUFA6;PRDX2;FES;CAT;JUNB;CDKN2D;PRDX1;MBP;MGST1;SOD1;PRDX4;GPX3;LAMTOR5;TXN;FTL;ATOX1;NDUFB4;G6PD;NQO1;ERCC2;PRNP;SELENOS;NDUFS2	L3-5IT-1
652	WikiPathway_2023_Human__IL1 And Megakaryocytes In Obesity WP2865	0.443726	1.86934	0.00616016	0.119631	1	8/17	9.64%	TLR2;PLA2G7;F2R;TLR1;TIMP1;ICAM1;NLRP3;IL1R1	L3-5IT-1
653	KEGG_2021_Human__Complement and coagulation cascades	0.281656	1.86825	0.0043956	0.119081	1	23/59	13.51%	VSIG4;CR2;SERPINE1;BDKRB2;C4BPA;SERPINC1;CFH;PROC;F3;F2R;TFPI;C4BPB;SERPINF2;CR1;C6;F10;CFD;C5AR1;C2;F7;ITGB2;F11;PLAUR	L3-5IT-1
654	GO_Biological_Process_2023__Positive Regulation Of T Cell Mediated Cytotoxicity (GO:0001916)	0.376003	1.86816	0.00211416	0.117647	1	13/25	18.21%	ULBP1;MICB;HFE;RAET1G;IL23R;RAET1E;ULBP2;HLA-F;HLA-DRB1;HLA-DRA;MR1;ULBP3;SLC22A13	L3-5IT-1
655	MSigDB_Hallmark_2020__Protein Secretion	-0.26022	-1.86374	0.00347826	0.0774889	0.999	84/93	61.89%	EGFR;TSPAN8;CD63;ABCA1;COPE;CAV2;AP2S1;SOD1;AP2M1;YKT6;GLA;ATP7A;BNIP3;SCAMP3;TMED2;CLN5;ARF1;ERGIC3;GNAS;RAB14;PPT1;NAPA;M6PR;CLTA;RER1;ATP1A1;VAMP3;LAMP2;ARCN1;COPB2;NAPG;AP3B1;YIPF6;AP3S1;SGMS1;GALC;SCAMP1;SNX2;STX16;RAB22A;RPS6KA3;STAM;CLTC;CLCN3;DNM1L;RAB2A;SCRN1;MON2;ARFGEF1;SH3GL2;DOP1A;DST;SEC31A;USO1;RAB5A;GBF1;ARFIP1;AP2B1;AP1G1;GOLGA4;COPB1;ICA1;KIF1B;IGF2R;VPS45;STX12;VPS4B;ATP6V1H;MA…	L3-5IT-1
656	KEGG_2021_Human__Toxoplasmosis	0.249636	1.86355	0.00458716	0.118625	1	38/96	23.69%	PIK3CG;TLR2;HLA-DMB;BIRC3;HLA-DPA1;HLA-DQA1;IRGM;HLA-DQB1;TLR4;LAMA2;LAMA4;LY96;ITGA6;LAMC2;LAMC3;LAMB2;LAMB4;HLA-DRB1;CD40;HLA-DRA;LAMA3;HSPA1B;LAMA1;TGFB2;CIITA;LAMA5;IL10RB;TGFB3;HLA-DMA;MAPK13;NFKBIA;TGFB1;IRAK4;MAPK3;AKT1;MAP2K3;MAPK11;TYK2	L3-5IT-1
657	GO_Biological_Process_2023__Response To Unfolded Protein (GO:0006986)	-0.330797	-1.8629	0.00723327	0.0776125	0.999	30/43	44.07%	HSPB7;HSPB2;HSPE1;HSPA8;HSPB3;DDIT3;HSPA2;DNAJB5;HSPA1A;BAK1;HSPA1L;HSP90AB1;HSPB1;DAXX;BAX;HSP90AA1;DNAJC4;DNAJA1;DNAJB4;DAB2IP;TOR1B;HERPUD1;DNAJB1;HSPD1;HSPH1;OPTN;DERL1;TMBIM6;TRAM1;PACRG	L3-5IT-1
658	MSigDB_Hallmark_2020__Interferon Alpha Response	0.249467	1.86017	0.00220751	0.119644	1	36/89	21.09%	DDX60;IFI44L;PARP9;IFIH1;USP18;TENT5A;EPSTI1;PSMB8;SELL;PSMB9;IFITM2;CSF1;TXNIP;ISG20;UBA7;IL15;HELZ2;SAMD9L;TAP1;LGALS3BP;PARP12;LAMP3;MVB12A;IFITM3;GMPR;IL4R;GBP4;RNF31;IFI35;IRF9;CMPK2;DHX58;PROCR;PLSCR1;ELF1;MX1	L3-5IT-1
659	GO_Biological_Process_2023__Positive Regulation Of Cell-Cell Adhesion (GO:0022409)	0.337575	1.85993	0.00225734	0.118402	1	13/33	15.91%	FUT3;TNFSF11;NODAL;CD44;PTPRU;SERPINF2;SIRPG;CCL5;SKAP1;LCK;PIEZO1;PLAUR;PLPP3	L3-5IT-1
660	GO_Cellular_Component_2023__Cytoplasmic Dynein Complex (GO:0005868)	-0.429483	-1.85825	0.00389105	0.0791951	0.999	19/20	53.02%	DYNLT5;DYNLT2B;DYNLL1;DYNLRB1;DYNLT3;DYNC2I2;DYNLT2;DYNLL2;DYNLRB2;DYNLT1;DYNC1I2;DYNC1LI2;DYNC1LI1;NUDCD3;SNX4;TPR;DYNC2H1;DYNC2LI1;DYNC1I1	L3-5IT-1
661	GO_Biological_Process_2023__Positive Regulation Of T Cell Mediated Immunity (GO:0002711)	0.343029	1.85743	0.00211416	0.118977	1	14/32	17.15%	ULBP1;MICB;HFE;RAET1G;IL23R;RAET1E;ULBP2;HLA-F;HLA-DRB1;HLA-DRA;FZD5;ZP3;ULBP3;TNFSF4	L3-5IT-1
662	GO_Biological_Process_2023__Monoatomic Anion Transport (GO:0006820)	0.303294	1.85722	0.00209205	0.117733	1	24/46	27.50%	SLC5A8;SLC17A1;SLC26A7;SLC4A1;SLC17A3;CLCN1;SLC26A3;SLC17A8;SLC5A5;GLRA1;BEST1;ANO7;SLC26A1;SLC26A6;CLIC5;LRRC8D;SLC26A4;SLC26A8;TTYH3;SLC17A6;LRRC8A;LRRC8C;ANO8;CLCN2	L3-5IT-1
663	GO_Biological_Process_2023__Regulation Of Nervous System Development (GO:0051960)	-0.326619	-1.85521	0.00567108	0.0806522	0.999	15/41	13.41%	CX3CR1;HEY2;NKX6-2;HES1;S100A10;LEF1;HEYL;HES5;PER2;TYMP;HES2;ASCL1;HES6;HEY1;PTPRZ1	L3-5IT-1
664	WikiPathway_2023_Human__Apoptosis Modulation And Signaling WP1772	-0.270816	-1.85279	0.00180832	0.0815995	0.999	32/80	21.02%	CASP10;TNFRSF10D;PMAIP1;BLK;TNFSF10;TNFRSF10A;TNFRSF1A;CASP1;BCL2L10;PRKD1;CDKN2A;ENDOG;FOS;BOK;FADD;CYCS;BID;HSPA1A;BAK1;HTRA2;IRAK1;HRK;SEPTIN4;FAS;CAPNS1;TRADD;DAXX;BIRC5;BAD;JUN;BAX;CASP8	L3-5IT-1
665	GO_Biological_Process_2023__Inorganic Cation Import Across Plasma Membrane (GO:0098659)	0.243412	1.85167	0.00222717	0.12098	1	44/96	27.30%	SCNN1A;FXYD2;SLC9A3;SLC39A12;TRPV4;CACNA1H;SCN5A;SLC9C1;ATP1B2;TRPM1;KCNJ5;ABCC9;SLC9C2;SCN7A;SCNN1B;SLC5A1;TRPV6;KCNJ10;AQP8;ATP1A2;SCNN1D;KCNJ1;KCNE2;HCN4;KCNJ2;KCNJ14;TRPM4;CACNA1G;SLC12A3;CACNA1I;SLC12A8;SCN9A;KCNJ4;TRPV1;SLC8A2;CACNA1B;SCN1A;SLC12A9;CACNA1A;HCN2;SCN11A;SLC9A5;KCNH2;SLC39A14	L3-5IT-1
666	GO_Biological_Process_2023__Regulation Of Nitric Oxide Biosynthetic Process (GO:0045428)	-0.358027	-1.85118	0.00714286	0.0821268	0.999	17/32	26.89%	CX3CR1;DDAH2;CAV1;TLR6;KLF4;HBB;PTGS2;KLF2;ASS1;PTGIS;HSP90AB1;EDN1;CLU;GLA;HSP90AA1;DDAH1;RAC1	L3-5IT-1
667	GO_Cellular_Component_2023__Cell Projection Membrane (GO:0031253)	0.245584	1.85003	0.00665188	0.121089	1	45/93	31.65%	SCNN1A;ATP6V0A4;DRD2;ARL13A;CYBRD1;SLC9A3;SLC17A3;SYTL1;SLC28A1;SLC28A3;AQP1;GPR157;ATP1B2;CNGB1;DRD1;SLC5A1;AQP8;SSTR3;CUBN;SLC26A6;SMO;SLC38A4;EVC2;ACE2;SLC7A9;PLB1;PDPN;SLC26A4;B4GALT1;PEX19;GPR161;CDHR2;CD36;SLC7A5;ITGA3;PALM;PLEKHO1;BBS5;SLC22A5;TCTN2;ITGAV;DMTN;TMEM231;SYNE2;LIMA1	L3-5IT-1
668	GO_Biological_Process_2023__Positive Regulation Of Blood Coagulation (GO:0030194)	-0.42148	-1.84728	0.00373134	0.084025	0.999	11/20	19.52%	PLAU;EMILIN1;APOH;HPSE;EMILIN2;VTN;PLAT;PLG;F12;F2;THBS1	L3-5IT-1
669	GO_Cellular_Component_2023__Secretory Granule Lumen (GO:0034774)	-0.203115	-1.84533	0	0.0846856	1	101/257	27.83%	APRT;ISLR;MNDA;TRAPPC1;C3;FRK;TCN1;PYCARD;POMC;GRP;JUP;TUBB2A;RARRES2;ELANE;VEGFC;IGF1;HSPA8;APOH;CHI3L1;S100A11;EGF;HPSE;DOCK2;EPX;GSDMD;PRTN3;TMSB4X;SELENOP;PPIA;ALOX5;SRP14;GSTP1;PSMC3;BIN2;MMRN1;PLG;CAT;GHRL;DBH;AHSG;CSNK2B;SPARC;CRISPLD2;ARG1;NME2;FABP5;SRGN;PGLYRP1;CSTB;KNG1;ARHGAP45;PGAM1;ALDOC;ITIH4;B2M;SERPINB1;PCSK1;ALDOA;PRDX4;ARPC5;F5;A2M;GHDC;MAGED2;UNC13D;VWF;TUBB4B;CTSD;HSP90AB1;VE…	L3-5IT-1
670	GO_Biological_Process_2023__Regulation Of Chemokine Production (GO:0032642)	-0.365623	-1.84452	0.00546448	0.0846583	1	12/28	12.30%	TLR7;PYCARD;ELANE;WNT5A;CSF1R;CD74;LGALS9;SIGIRR;IL18;IL7;AGER;LCP1	L3-5IT-1
671	GO_Molecular_Function_2023__Double-Stranded DNA Binding (GO:0003690)	0.172979	1.84438	0	0.124337	1	139/448	21.54%	LMX1B;TBX2;FIGLA;EMX2;NHLH2;ZIC1;PTF1A;TBX6;HES7;TBX1;MSH5;DDX60;RORC;NFATC4;IGF2BP1;H1-3;IFI16;SYCP1;POU2F3;PROX1;SNAI2;TBX19;ZIC4;MAF;DRGX;RXRG;DMRTA2;GTF2H4;SIX4;PAX6;GLI3;DPEP1;ZNF296;ADRA2A;PRRX2;SNAI1;TBX15;MYBL2;FOXA3;DMRT3;TFCP2L1;FLI1;DLX4;ETV7;ZNF501;MEOX2;ELF3;E2F7;NR1I3;IRF4;MEOX1;PAX3;RHOXF1;LHX1;RHOXF2;POU3F1;TFEC;CREB3L4;NHLH1;PAX2;SKOR1;PAX8;MNX1;GCM2;SCRT2;NANOG;CRX;FOSB;RFX5;FOX…	L3-5IT-1
672	GO_Molecular_Function_2023__Copper Ion Binding (GO:0005507)	-0.327232	-1.84391	0.00767754	0.0845624	1	21/37	29.37%	IL1A;TYR;HEPH;CUTA;SNCG;SCO2;LACC1;LOXL3;DBH;S100A13;MT3;SOD1;RNF7;SNCB;ATOX1;COX17;ATP7A;TP53;PRNP;GPC1;PARK7	L3-5IT-1
673	GO_Biological_Process_2023__Regulation Of Activated T Cell Proliferation (GO:0046006)	-0.384578	-1.84022	0.00754717	0.0859204	1	13/26	18.58%	CRTAM;PYCARD;IGF1;IL23A;LGALS9;IL18;ICOSLG;FOXP3;FADD;CD24;PDCD1LG2;IGFBP2;IL12RB1	L3-5IT-1
674	GO_Biological_Process_2023__Cholesterol Biosynthetic Process (GO:0006695)	-0.395186	-1.83917	0.00757576	0.086097	1	19/24	41.06%	TM7SF2;PLPP6;DHCR7;PMVK;HMGCS1;G6PD;CYP51A1;INSIG1;HSD17B7;DHCR24;NSDHL;MSMO1;MVK;FDFT1;ACLY;ARV1;SC5D;MVD;HMGCR	L3-5IT-1
675	GO_Biological_Process_2023__Regulation Of Neurogenesis (GO:0050767)	-0.293612	-1.83856	0.00750469	0.0861367	1	20/57	17.23%	CX3CR1;HEY2;SOX11;LRP2;NOTCH1;WNT3A;HES1;KHDC3L;S100A10;LEF1;HEYL;HES5;PER2;HES2;ASCL1;HES6;HEY1;B2M;RGS14;REST	L3-5IT-1
676	GO_Molecular_Function_2023__Endopeptidase Regulator Activity (GO:0061135)	-0.354685	-1.83717	0.00956023	0.0865179	1	16/33	20.27%	PSENEN;RENBP;PCSK1N;PSME2;PSME1;SERPIND1;PZP;AHSG;ADRM1;CSTB;ITIH4;SPINK2;APH1A;CST3;THBS1;NLRC4	L3-5IT-1
677	KEGG_2021_Human__Arginine and proline metabolism	-0.307923	-1.83371	0.00547445	0.0879996	1	30/48	36.75%	HOGA1;NOS3;CARNS1;PRODH;DAO;PYCR1;ARG1;CNDP1;CKB;ALDH4A1;PYCR3;ALDH1B1;P4HA3;GAMT;SAT2;PYCR2;GOT1;SRM;AGMAT;ODC1;ALDH9A1;NOS2;CKMT1A;LAP3;AMD1;ARG2;SAT1;CNDP2;CKMT1B;OAT	L3-5IT-1
678	WikiPathway_2023_Human__Inflammatory Bowel Disease Signaling WP5198	0.365425	1.83062	0.00634249	0.131784	1	13/26	19.57%	TLR2;RORC;MAF;IL21R;TLR4;IL23R;IL5;NFATC1;TLR5;IL4R;STAT4;HLA-DMA;TGFB1	L3-5IT-1
679	GO_Biological_Process_2023__Positive Regulation Of Cysteine-Type Endopeptidase Activity Involved In Apoptotic Process (GO:0043280)	-0.253754	-1.83059	0	0.0886877	1	47/95	31.42%	SYK;ST18;ROBO1;CASP10;LAPTM5;PMAIP1;PYCARD;TNFSF10;NDUFA13;HSPE1;CASP1;MYC;BCL2L10;RFPL1;LGALS9;UACA;DYNLL1;BOK;BEX3;CYCS;HIP1;FIS1;BID;HTRA2;REST;CTSD;CARD8;FAS;RACK1;NLRC4;BAD;BAX;CASP8;NOD1;GSN;PRR7;DIABLO;BCAP31;MTCH1;PDCD6;COL4A3;RPS3;PDCD5;PDCD2;BCL10;RPS27L;ARL6IP5	L3-5IT-1
680	GO_Biological_Process_2023__Epidermis Development (GO:0008544)	0.28705	1.82995	0.00645161	0.13098	1	24/55	20.60%	S100A7;KRT31;POU2F3;FLG2;EMP1;OVOL3;GRHL2;LAMC2;CRABP2;HLA-DRB1;LAMA3;ZNF750;SVEP1;SPINK5;KLK5;KLK14;MANSC4;COL7A1;KRTDAP;FGF7;SPINT1;DCT;CERS3;PLOD1	L3-5IT-1
681	GO_Biological_Process_2023__Defense Response To Bacterium (GO:0042742)	0.238443	1.82871	0	0.129212	1	40/106	18.20%	LTF;SLAMF8;JCHAIN;WFDC10B;GBP6;TLR2;MPO;SERPINE1;FPR2;OAS2;LYZ;STAB1;IRGM;DEFB109B;TLR4;F3;OAS3;GBP1;IL23R;GBP7;AQP1;COLEC12;IFNE;TFEB;GBP3;GSDMA;WFDC2;SLC11A1;MR1;GBP4;SPN;RNF31;NLRP1;CFP;IL6R;GNLY;LYZL4;AZU1;STAB2;TNFRSF14	L3-5IT-1
682	WikiPathway_2023_Human__Kallmann Syndrome WP5074	-0.419804	-1.82851	0.0095057	0.0895072	1	8/20	11.75%	SEMA3E;SOX10;MYRF;OLIG2;ANOS1;FGF8;CHD7;ASCL1	L3-5IT-1
683	GO_Biological_Process_2023__Regulation Of Interleukin-8 Production (GO:0032677)	-0.284046	-1.8276	0.00191939	0.0895566	1	23/60	17.75%	SYK;TLR7;PTPRC;PYCARD;CD33;ELANE;ANXA1;CHI3L1;LILRA2;NLRP10;C5AR2;TLR6;KLF4;CD74;TMSB4X;LGALS9;DDIT3;FADD;BCL3;HSPA1A;HYAL2;LAMTOR5;ZNF580	L3-5IT-1
684	WikiPathway_2023_Human__Interactome Of Polycomb Repressive Complex 2 PRC2 WP2916	0.448547	1.8276	0.0095057	0.128816	1	16/16	55.19%	EZH2;TRIM35;RBBP7;AEBP2;ELL;EZH1;RBBP4;MORC3;STK38;SUZ12;EED;BCLAF1;MTF2;SETX;THRAP3;JARID2	L3-5IT-1
685	GO_Biological_Process_2023__Protein Neddylation (GO:0045116)	-0.412813	-1.82593	0.00568182	0.0902884	1	21/21	58.78%	NEDD8;RNF7;COPS6;COPS7A;UBE2M;UBE2F;GPS1;COPS8;DCUN1D3;COPS5;COPS3;RBX1;COPS4;DCUN1D5;DCUN1D1;DCUN1D4;UBA3;NAE1;DCUN1D2;COPS7B;COPS2	L3-5IT-1
686	GO_Biological_Process_2023__Sensory Perception Of Bitter Taste (GO:0050913)	0.376794	1.8259	0.00417537	0.128902	1	14/24	21.13%	CA6;TAS2R7;TAS2R8;TAS2R9;TAS2R1;RTP5;TAS2R10;TAS2R31;TAS2R4;TAS2R19;TAS2R13;TAS2R46;TAS2R30;TAS2R50	L3-5IT-1
687	GO_Biological_Process_2023__Positive Regulation Of B Cell Proliferation (GO:0030890)	-0.401271	-1.82148	0.00386847	0.0924533	1	12/22	22.26%	VAV3;PTPRC;CLCF1;SASH3;CD74;NFATC2;NCKAP1L;IL7;GPR183;CD320;CHRNB2;CD81	L3-5IT-1
688	GO_Biological_Process_2023__Tumor Necrosis Factor-Mediated Signaling Pathway (GO:0033209)	-0.332516	-1.81968	0.00896057	0.0930413	1	21/37	30.61%	ST18;PYCARD;TNFRSF1A;PYDC1;EIF5A;TMSB4X;TXNDC17;RRAGA;PLVAP;TRAF4;CARD14;TNFRSF11A;TRADD;STAT1;TRAF5;ILK;TP53;RELA;COMMD7;AIM2;TRAF2	L3-5IT-1
689	WikiPathway_2023_Human__Cholesterol Metabolism With Bloch And Kandutsch Russell Pathways WP4718	-0.308499	-1.81714	0.00541516	0.0941367	1	31/45	42.01%	SCD;ABCA1;CYP27A1;TM7SF2;CH25H;ELOVL2;IDI1;EBP;DHCR7;PMVK;SQLE;HMGCS1;CYP51A1;FDPS;SREBF1;HSD17B7;CYP46A1;FASN;ACOT2;MYLIP;DHCR24;NSDHL;ACAT2;MSMO1;MVK;FDFT1;ELOVL5;SC5D;MVD;HMGCR;ELOVL4	L3-5IT-1
690	GO_Biological_Process_2023__Negative Regulation Of Neuron Differentiation (GO:0045665)	-0.409454	-1.81646	0.00749064	0.0940785	1	9/19	18.62%	DLX1;HES1;HES5;BMP7;HEY1;B2M;SOX2;REST;CALR	L3-5IT-1
691	GO_Biological_Process_2023__Intracellular Protein Transmembrane Transport (GO:0065002)	-0.305462	-1.81397	0.00702988	0.0953072	1	27/46	38.16%	DNLZ;ROMO1;TOMM20L;TIMM17B;PAM16;PEX12;SEC61B;HSPA5;TIMM17A;TOMM20;CHCHD4;GRPEL1;TOMM40L;SEC61G;GRPEL2;PEX16;PEX10;TIMM50;DNAJC19;ZFAND2B;TOMM40;TIMM44;HYOU1;HSPD1;PEX6;SEC62;PEX2	L3-5IT-1
692	GO_Biological_Process_2023__Regulation Of Angiogenesis (GO:0045765)	-0.214775	-1.81166	0	0.0963087	1	46/169	13.01%	IL1A;KDR;ETS1;ITGAX;GPNMB;SFRP1;RAMP2;SEMA3E;HK2;SMOC2;CCR3;JUP;ANXA3;VEGFC;ANGPTL3;SFRP2;EMILIN1;SEMA5A;PRKD1;APOH;CHI3L1;RRAS;HMGA2;NOS3;WNT5A;EMILIN2;THBS2;PSG1;KLF4;HSPB6;TNFAIP3;CLDN5;ALOX5;RGCC;ADAMTS1;FOXO4;FGF1;GHRL;DCN;YJEFN3;ISM1;PIK3R6;SPRED1;SPARC;CD34;NINJ1	L3-5IT-1
693	GO_Biological_Process_2023__Mitochondrion Organization (GO:0007005)	-0.221454	-1.80647	0.00170648	0.0990845	1	67/154	32.54%	COX7A1;RAB5IF;TERT;ATP5F1D;HK2;TSPO;TIMM8B;CHCHD2;HSD17B10;CHCHD10;TYMP;NOS3;HIGD2A;TOMM22;TIMM13;MGARP;TIMM10;BCS1L;COX7A2;PHB1;MTX1;CAV2;FIS1;BID;TOMM7;TIMM17B;FMC1;HAX1;HIGD1A;HIGD1B;STOML2;RAB32;SLC25A4;AIP;IFIT2;TIMM17A;BAX;PHB2;TOMM5;TMEM11;TOMM20;CHCHD4;CHCHD7;TMEM70;PINK1;ATP7A;THG1L;BNIP3;NOA1;APEX1;GBA1;ATP2A1;WDR81;MIEF1;SIRT4;BCAP31;TOMM34;OMA1;COX7A2L;PARK7;TIMM50;DNAJC19;PRDX3;TOMM4…	L3-5IT-1
694	GO_Cellular_Component_2023__Cytoplasmic Vesicle Lumen (GO:0060205)	-0.248036	-1.80578	0.0017301	0.0991145	1	31/101	16.26%	APRT;C3;PYCARD;POMC;GRP;HSPA8;S100A11;EPX;PPIA;ALOX5;SRP14;GSTP1;PSMC3;BIN2;CAT;GHRL;DBH;AHSG;CSNK2B;CRISPLD2;NME2;CSTB;ARHGAP45;PGAM1;ALDOC;SERPINB1;PCSK1;ALDOA;PRDX4;ARPC5;GHDC	L3-5IT-1
695	KEGG_2021_Human__Ribosome biogenesis in eukaryotes	-0.269559	-1.80219	0	0.0998063	1	39/73	37.52%	RPP25L;NOP10;NHP2;RPP25;POP7;NXT2;NXT1;IMP3;CSNK2B;IMP4;POP5;EMG1;FBL;CSNK2A3;RAN;EIF6;RPP40;TBL3;SBDS;SNU13;NOL6;RRP7A;POP4;FBLL1;DKC1;LSG1;GNL3;GAR1;RIOK2;REXO2;NOP56;NOB1;UTP15;AK6;RPP38;GNL2;GTPBP4;MPHOSPH10;RIOK1	L3-5IT-1
696	GO_Biological_Process_2023__Skeletal System Development (GO:0001501)	-0.238375	-1.80042	0.00725953	0.100614	1	38/113	17.36%	CLEC3A;COL9A2;TLL1;MMP14;LECT2;MEPE;IGF1;HES5;CHI3L1;BMP6;WNT5A;VKORC1;FGF8;KIAA1217;CDH11;SULF2;CHD7;ARSL;ALPL;ALX4;ADAMTS4;PTHLH;GHRL;BMP7;DLL3;RPL13;AHSG;BMP1;PRDX1;HHIP;OGN;COL19A1;EVC;BMP2;HYAL2;CHRD;COL10A1;PTH1R	L3-5IT-1
697	GO_Biological_Process_2023__Regulation Of Blood Coagulation (GO:0030193)	-0.370903	-1.79557	0.0077821	0.102454	1	14/26	19.52%	PLAU;EMILIN1;APOH;CAV1;HPSE;EMILIN2;VTN;KNG1;APOE;F12;SERPINE2;F2;EDN1;THBS1	L3-5IT-1
698	KEGG_2021_Human__Neutrophil extracellular trap formation	-0.240032	-1.79547	0.00914077	0.102057	1	44/118	22.13%	SYK;TLR7;H4C3;C3;SLC25A5;H2BC11;H4C4;H3C6;AQP9;ELANE;CASP1;SELPLG;H2AC8;CYBB;ITGAM;SELP;H2BC21;GSDMD;H2AZ1;AGER;FPR3;H2BC15;H2AC20;H2BC4;H4C5;H3C1;PIK3R3;FPR1;CR1L;VWF;H4C8;PLCB2;ITGAL;PIK3R2;SLC25A4;H3-3B;H2AX;HDAC10;HDAC1;H2AC6;ACTG1;PRKCG;PPIF;MAPK12	L3-5IT-1
699	WikiPathway_2023_Human__GPCRs Other WP117	0.272188	1.79282	0.00610998	0.142406	1	28/61	21.62%	PTGFR;HTR7;FSHR;UTS2R;PROKR2;F2R;HRH4;GHRHR;GPR143;DRD4;GPR83;ACKR1;S1PR1;ADGRD1;GPR88;ADGRE2;CHRM2;SMO;MCHR2;OR1F1;HTR1F;P2RY11;ADGRF5;OR2M4;RXFP1;ADGRG1;VN1R1;ADGRV1	L3-5IT-1
700	WikiPathway_2023_Human__Parkin Ubiquitin Proteasomal System Pathway WP2359	-0.272885	-1.79254	0.00185529	0.103576	1	29/67	27.83%	TUBB2A;CASP1;GPR37;HSPA8;TUBA1A;TUBA4A;PSMC3;STUB1;PSMC5;HSPA2;HSPA1A;PSMD8;TUBB3;TUBA1B;TUBB4B;TUBB2B;SEPTIN5;HSPA1L;HSPA5;TUBB6;TUBB;CASP8;TUBB4A;SNCAIP;PSMD10;UBE2L6;PSMC4;PSMD2;PSMD7	L3-5IT-1
701	GO_Biological_Process_2023__Positive Regulation Of Programmed Cell Death (GO:0043068)	-0.204813	-1.78982	0	0.105012	1	104/222	33.41%	SYK;MNDA;LGALS1;FOXO1;SFRP1;LAPTM5;LILRB1;PMAIP1;PYCARD;TNFSF10;SCIN;TNFRSF10A;DUSP6;SFRP2;EMILIN1;EEF1E1;SFRP4;GBP2;GADD45G;EMILIN2;RFPL1;PNMA5;DAPK2;FZD9;PANO1;SOX4;BOK;HTRA1;FADD;BARD1;C1QBP;GADD45B;PIP5KL1;KNG1;CALHM2;BID;USP27X;PHLDA3;BAK1;GADD45A;RNF122;ANO6;SOD1;BMP2;HTRA2;SAP18;IRF5;HTRA4;MOAP1;NTRK1;REST;CTSD;ADAMTSL4;RPS6;HRK;SEPTIN4;IFIT2;FAS;ATF4;RACK1;TRADD;TFPT;RASSF2;CLU;SMPD1;NLRC…	L3-5IT-1
702	GO_Biological_Process_2023__Regulation Of Tyrosine Phosphorylation Of STAT Protein (GO:0042509)	-0.320629	-1.78961	0.00894454	0.104688	1	14/38	11.95%	HES1;TNFRSF1A;CLCF1;IGF1;IL23A;HES5;GHR;KIT;LYN;CSF1R;ERBB4;IL18;PARP14;CTF1	L3-5IT-1
703	GO_Biological_Process_2023__Positive Regulation Of Defense Response (GO:0031349)	0.237585	1.78889	0.00217391	0.141695	1	33/91	18.62%	CCN4;GBP5;MEFV;GPSM3;TLR2;IGF2BP1;PLA2G7;SERPINE1;SH2D1B;FPR2;IRGM;CYBA;TLR4;IL33;NLRP3;CCL5;IL15;EREG;NLRP12;MMRN2;RNF31;AGT;NLRP1;ZP3;MYO1C;IFI35;NFKBIZ;TNFSF4;ADAM8;IL17RA;MAPK13;FEM1A;NFKBIA	L3-5IT-1
704	GO_Biological_Process_2023__Hemopoiesis (GO:0030097)	-0.254172	-1.78373	0.00179856	0.107365	1	42/89	28.52%	TAL1;PTPRC;KDR;LYL1;SFRP1;TGFBR2;INHBA;SFRP2;EVI2B;KIT;RRAS;LYN;ZFP36L2;PLD4;WNT5A;CSF1R;JAG1;EPOR;RUNX2;FLT3LG;YJEFN3;CD34;NOTCH4;KITLG;KIRREL3;CEBPA;PBXIP1;ATF4;KLF3;SBDS;FSTL3;CEBPB;ARMC6;GLRX5;BMI1;PINK1;PDGFB;TP53;L3MBTL1;DLL1;WNT10B;ZFPM1	L3-5IT-1
705	GO_Biological_Process_2023__Positive Regulation Of Wnt Signaling Pathway (GO:0030177)	-0.238623	-1.77844	0.00520833	0.109965	1	25/103	10.65%	DAAM2;SFRP1;TERT;SALL1;DISC1;WNT3A;JUP;MRPS12;BAMBI;SFRP2;LGR6;SEMA5A;EGFR;EGF;SFRP4;SCEL;CAV1;RSPO3;SULF2;TNFAIP3;GPRC5B;DACT1;KANK1;FZD9;SOX4	L3-5IT-1
706	WikiPathway_2023_Human__Breast Cancer Pathway WP4262	-0.22348	-1.77741	0.00172117	0.109824	1	46/139	20.84%	HEY2;NOTCH1;WNT3A;CCND1;HES1;FGF20;MYC;WNT6;LEF1;FZD7;IGF1;HEYL;HES5;SHC4;EGFR;EGF;SFRP4;KIT;FGF6;WNT5A;GADD45G;FGF8;TCF7L1;FOS;WNT4;FZD9;FGF1;FRAT2;DLL3;NOTCH3;HRAS;PIK3R3;CSNK2B;GADD45B;HEY1;NOTCH4;BAK1;GADD45A;FGF22;CSNK2A3;PIK3R2;FGF23;FGFR1;WNT10A;JUN;BAX	L3-5IT-1
707	GO_Biological_Process_2023__Cellular Response To Estradiol Stimulus (GO:0071392)	-0.43387	-1.77297	0.0095057	0.111072	1	9/16	23.73%	SFRP1;EGFR;CRHBP;ZNF703;H2AZ1;SSTR1;RAMP3;SSTR2;KAT5	L3-5IT-1
708	WikiPathway_2023_Human__Metabolic Reprogramming In Colon Cancer WP4290	-0.310036	-1.77292	0.00902527	0.110657	1	30/41	43.30%	GAPDH;LDHA;PYCR1;PGAM1;PYCR2;TIGAR;SLC16A3;MDH2;SLC2A1;G6PD;ENO1;PDHB;PSAT1;PSPH;FASN;PFKL;TKT;PKM;IDH2;PGK1;TALDO1;RPIA;PDHA1;FH;ACLY;PPAT;GOT2;IDH3A;DLST;GLS	L3-5IT-1
709	GO_Biological_Process_2023__Activation Of Protein Kinase B Activity (GO:0032148)	-0.406103	-1.77159	0.00909091	0.111191	1	11/20	29.37%	IGF1;WNT5A;PPIA;IL18;FGF1;ADRA2C;MT3;TXN;PINK1;PDGFB;PARK7	L3-5IT-1
710	GO_Biological_Process_2023__Sodium Ion Transport (GO:0006814)	0.255221	1.77102	0.00663717	0.150704	1	35/77	27.03%	SCNN1A;SLC5A8;SLC4A11;SLC17A3;SCN5A;SLC6A12;SLC5A5;PKD2L1;SCN7A;SCNN1B;ASIC4;SLC5A1;ATP1A2;SCNN1D;SLC6A4;SLC5A12;SLC6A20;SLC6A13;HCN4;FGF13;HCN3;SLC12A3;SLC6A9;SLC6A8;SCN9A;SLC5A6;ASIC2;SLC6A16;SCN4B;SLC6A11;SLC8A2;SCN1A;HCN2;SCN11A;SLC9A5	L3-5IT-1
711	GO_Biological_Process_2023__Regulation Of MAPK Cascade (GO:0043408)	-0.214456	-1.77039	0.00172414	0.111623	1	71/176	26.57%	ADRA1D;LPAR1;ART4;SYK;VRK2;PTPRC;KDR;DUSP2;LAPTM5;DUSP4;DUSP6;GPR37;IGF1;INAVA;EGFR;EGF;KIT;RRAS;CAV1;GREM1;CD4;LYN;CSF1R;DUSP29;CD74;PPIA;LBH;GSTP1;SPRED3;REN;GRAP2;GPR37L1;DUSP5;GHRL;CAV3;ADRA2C;HRAS;SPRED1;CD24;CAV2;IGFBP6;PEBP1;FLT1;SOX2;DUSP1;WDR54;SOD1;BMP2;PIK3R2;FAS;FGFR1;PLCE1;SPRED2;LAMTOR1;PHB2;FN1;PSMD10;AVPI1;CHRNA7;CD81;DOK6;ADRA1B;GRM4;TRIM5;DOK4;DUSP16;PDGFB;TRAF7;DUSP7;ATP6AP2;CE…	L3-5IT-1
712	KEGG_2021_Human__Th17 cell differentiation	0.241434	1.75757	0.00434783	0.155821	1	35/85	24.27%	RORC;HLA-DMB;HLA-DPA1;RXRG;HLA-DQA1;IL21R;HLA-DQB1;IL23R;IRF4;ZAP70;HLA-DRB1;IL1R1;NFATC1;HLA-DRA;LCK;RUNX1;IL4R;RARA;RXRA;CD247;IL2RB;IL6R;HLA-DMA;MAPK13;NFKBIA;LAT;TGFB1;MAPK3;AHR;SMAD3;PPP3R1;MAPK11;TYK2;RORA;JAK3	L3-5IT-1
713	GO_Biological_Process_2023__Regulation Of Proteolysis (GO:0030162)	-0.301151	-1.75641	0.00793651	0.119992	1	18/45	21.02%	NEDD8;TM4SF20;CAV1;AURKAIP1;CDK5;PLAT;STUB1;FADD;CSTB;KNG1;BAK1;SERPINE2;F2;CST3;PERP;PARL;BAD;CASP8	L3-5IT-1
714	GO_Cellular_Component_2023__9+2 Motile Cilium (GO:0097729)	0.271482	1.75586	0.00461894	0.156189	1	30/56	31.46%	TEKT5;TTLL8;TCP11;TACR2;CFAP58;DCDC2C;TACR1;TTC29;RSPH6A;DNAH2;DNAH11;DNAJB13;CFAP65;LYZL4;TEKT3;DNAH17;AK8;QRICH2;ODAD4;SAXO1;CFAP52;TCTE1;CFAP74;WBP2NL;TTLL3;DNAH1;CFAP70;CFAP221;ATP2B4;FLACC1	L3-5IT-1
715	KEGG_2021_Human__Rap1 signaling pathway	-0.206718	-1.74848	0	0.122731	1	63/191	22.13%	LPAR1;ANGPT1;FYB1;APBB1IP;VAV3;PDGFRA;KDR;LPAR3;P2RY1;VEGFC;PARD6A;FGF20;PFN1;PARD3;IGF1;MET;PRKD1;CNR1;EGFR;VAV1;EGF;KIT;RRAS;FGF6;ITGAM;CSF1R;FGF8;PDGFD;NGF;CDH1;ID1;ANGPT2;FGF1;CALM2;HRAS;PIK3R3;PFN4;ADCY8;FPR1;ADCY7;FLT1;RAC3;CALM3;KITLG;FGF22;CALML4;RGS14;PLCB2;ITGAL;PIK3R2;FGF23;CALM1;PFN2;VEGFB;THBS1;FGFR1;PLCE1;ACTG1;PDGFRB;PRKCG;RASGRP3;PRKD3;MAPK12	L3-5IT-1
716	GO_Biological_Process_2023__Cardiac Muscle Tissue Development (GO:0048738)	-0.316065	-1.74167	0.00722022	0.125347	1	16/41	15.88%	MYOCD;HEY2;CSRP3;NOTCH1;MSC;SGCZ;GREM1;NPPA;MESP1;MYL7;ADAMTS9;TCAP;BMP7;HEY1;BMP2;PRMT1	L3-5IT-1
717	GO_Biological_Process_2023__Positive Regulation Of Inflammatory Response (GO:0050729)	0.251154	1.73858	0.0021978	0.165476	1	28/72	18.62%	CCN4;MEFV;GPSM3;TLR2;IGF2BP1;PLA2G7;SERPINE1;NUPR1;TLR4;IL33;NLRP3;IL15;PLCG2;NLRP12;CREB3L3;OSMR;AGT;NLRP1;ZP3;MYO1C;IFI35;NFKBIZ;TNFSF4;ADAM8;IL17RA;MAPK13;FEM1A;NFKBIA	L3-5IT-1
718	GO_Biological_Process_2023__Regulation Of Tumor Necrosis Factor Production (GO:0032680)	-0.235491	-1.73545	0.00733945	0.129707	1	27/97	12.30%	CX3CR1;CIDEA;SYK;IL1A;PTPRC;CD84;DDT;LILRB1;PYCARD;POMC;CD33;IGF1;IL23A;HLA-E;LILRA2;WNT5A;C5AR2;OAS1;LGALS9;ELF4;TNFAIP3;GSTP1;AGER;C1QTNF4;GHRL;FADD;LCP1	L3-5IT-1
719	GO_Biological_Process_2023__Positive Regulation Of Cell-Substrate Adhesion (GO:0010811)	-0.271184	-1.73197	0.00934579	0.132145	1	28/60	26.89%	CCDC80;SFRP1;NPNT;DOCK1;JUP;S100A10;DOCK5;CIB1;VIT;C1QBP;RREB1;MDK;NEDD9;NELL1;LIMS2;RAC3;ARL2;ENC1;RELL2;ECM2;CALR;FN1;UTRN;ILK;CDH13;PDGFB;CSPG5;RAC1	L3-5IT-1
720	GO_Molecular_Function_2023__Carboxylic Ester Hydrolase Activity (GO:0052689)	0.237703	1.7316	0.00686499	0.169834	1	37/86	26.14%	LIPG;ASPG;PLA2G10;PLA2G7;PLA2G4A;ABHD15;LCAT;PLA1A;PON2;PLA2G4E;PNPLA5;CEL;CES3;NOTUM;PON1;ABHD4;ABHD16A;ABHD1;PAFAH2;ABHD12B;PNPLA1;CA1;PNPLA7;PLB1;PLAAT1;ABHD3;FAAH;PNPLA2;LYPLA2;PNPLA6;PNPLA4;PLAAT3;GDPD1;TARS2;PLA2G4C;AARS2;RGN	L3-5IT-1
721	GO_Molecular_Function_2023__Transmembrane Receptor Protein Kinase Activity (GO:0019199)	-0.329135	-1.73135	0.00917431	0.132162	1	14/33	16.83%	INSRR;PDGFRA;KDR;TGFBR2;BMPR1B;EGFR;MUSK;KIT;ERBB4;DDR1;TIE1;FLT1;MST1R;NTRK1	L3-5IT-1
722	KEGG_2021_Human__Spliceosome	-0.220606	-1.73053	0	0.131348	1	124/129	73.13%	SF3B5;HSPA8;SNRPD2;U2AF1L4;PUF60;HSPA2;BUD31;ALYREF;PQBP1;LSM3;HSPA1A;LSM4;LSM7;SF3B4;XAB2;SNRPB;HSPA1L;SF3B6;SNRPE;SNU13;PCBP1;SRSF2;SNRPA;LSM2;RBM22;SNRPB2;DDX23;EIF4A3;CWC15;HNRNPA1;BCAS2;SRSF8;SNRPC;SNRPD3;RBMXL1;PPIL1;ZMAT2;RBM8A;SYF2;SNRPG;RP9;WBP11;NCBP2;SNRPA1;PHF5A;SF3B2;PRPF4;HNRNPK;SRSF3;SRSF7;LSM5;MAGOHB;SLU7;CRNKL1;SNRPD1;SRSF9;SRSF5;PRPF8;PRPF38A;CDC5L;SRSF6;PLRG1;HNRNPA3;MAGOH;CCDC…	L3-5IT-1
723	GO_Cellular_Component_2023__Sperm Flagellum (GO:0036126)	0.287343	1.72511	0.00704225	0.171843	1	25/46	31.46%	TEKT5;TTLL8;TCP11;TACR2;CFAP58;DCDC2C;TACR1;TTC29;RSPH6A;DNAH2;DNAJB13;CFAP65;LYZL4;TEKT3;DNAH17;QRICH2;SAXO1;TCTE1;CFAP74;WBP2NL;TTLL3;DNAH1;CFAP70;ATP2B4;FLACC1	L3-5IT-1
724	GO_Cellular_Component_2023__U2-type Spliceosomal Complex (GO:0005684)	-0.242485	-1.72283	0.00905797	0.136283	1	86/88	73.13%	SF3B5;SNRPD2;BUD31;LSM3;LSM4;LSM7;SF3B4;XAB2;SNRPB;RNF113A;SF3B6;SNRPE;SNU13;LSM2;RBM22;HTATSF1;SNRPB2;EIF4A3;IK;CWC15;BCAS2;SNRPD3;PPIL1;ZMAT2;RBM8A;SYF2;SNRPN;SNRPG;TFIP11;SNRPA1;PHF5A;SF3B2;PRPF4;MFAP1;RBMX2;LSM5;MAGOHB;CRNKL1;SNRPD1;CWC25;PRPF8;PRPF38A;LUC7L2;CDC5L;PLRG1;WBP4;YJU2B;CCDC12;SF3B1;TXNL4A;SNW1;CWC27;PRPF18;PRPF40A;CDC40;PRPF39;GCFC2;CWC22;SNRNP40;SMU1;LUC7L3;SF3B3;EFTUD2;LSM8;SNR…	L3-5IT-1
725	GO_Biological_Process_2023__Negative Regulation Of Cell Communication (GO:0010648)	0.402882	1.71421	0.00843882	0.175894	1	7/17	9.77%	MPIG6B;ERBB3;KIF26A;IGFBP3;GLRA1;NLRP12;IL11	L3-5IT-1
726	MSigDB_Hallmark_2020__Cholesterol Homeostasis	-0.251907	-1.71304	0.00706714	0.143685	1	41/71	36.32%	ECH1;CD9;ATF5;ADH4;S100A11;LPL;JAG1;SCD;TP53INP1;FABP5;TM7SF2;ALDOC;LDLR;FBXO6;IDI1;EBP;CLU;DHCR7;ACTG1;PMVK;TMEM97;CBS;ALCAM;SQLE;HMGCS1;PNRC1;TRIB3;MAL2;CYP51A1;FDPS;STARD4;ABCA2;PCYT2;HSD17B7;FASN;NSDHL;ACAT2;CHKA;MVK;FDFT1;CPEB2	L3-5IT-1
727	WikiPathway_2023_Human__Complement System WP2806	0.246217	1.71298	0.00655022	0.175968	1	27/71	17.19%	SFTPA1;VSIG4;ADM;TLR2;PTX3;CR2;GNA15;C4BPA;SELL;CFH;ICAM1;CR1;C6;F10;SFTPA2;CFD;CD40;C5AR1;C2;FCN1;F11;PLAUR;CFP;LAMA5;F13A1;ALB;MASP2	L3-5IT-1
728	GO_Biological_Process_2023__Positive Regulation Of Apoptotic Process (GO:0043065)	-0.192541	-1.70189	0.00337268	0.148308	1	112/241	33.90%	MNDA;LGALS1;FOXO1;SFRP1;LILRB1;PMAIP1;PYCARD;TNFSF10;SCIN;TNFRSF10A;DUSP6;SFRP2;EMILIN1;EEF1E1;SFRP4;GADD45G;EMILIN2;RFPL1;PNMA5;DAPK2;CDK5;DYNLL1;FZD9;PANO1;SOX4;BOK;HTRA1;DDIT3;FADD;BARD1;C1QBP;GADD45B;PIP5KL1;KNG1;CALHM2;BID;USP27X;PTGIS;PHLDA3;BAK1;GADD45A;RNF122;ANO6;TP63;SOD1;BMP2;HTRA2;SAP18;IRF5;HTRA4;MOAP1;REST;CTSD;ADAMTSL4;RPS6;HRK;SEPTIN4;IFIT2;FAS;ATF4;RACK1;TRADD;TFPT;BRMS1;RASSF2;C…	L3-5IT-1
729	WikiPathway_2023_Human__mRNA Processing WP411	-0.219853	-1.70105	0.00542495	0.148611	1	118/125	70.97%	SF3B5;SNRPD2;LSM7;PRMT1;SF3B4;SNRPB;HNRNPH2;SNRPE;HNRNPAB;SNU13;SRSF2;SNRPA;LSM2;CSTF2T;SNRPB2;HNRNPA1;CD2BP2;PABPN1;CSTF1;YBX1;SNRPD3;SNRPN;SNRPG;CPSF4;NCBP2;SNRPA1;PHF5A;SF3B2;PRPF4;CLK2;DDX20;CLK3;HNRNPK;SRSF3;SRSF7;SUPT5H;PPM1G;DNAJC8;SNRPD1;SRSF9;SRSF5;PRPF8;SRSF6;HNRNPR;SRP54;CLK4;SFPQ;RNPS1;RBMX;SF3B1;HNRNPH1;RNMT;TXNL4A;TRA2B;HNRNPD;RBM17;DDX1;RNGTT;CELF2;HNRNPC;SREK1;SRPK2;RBM39;HNRNPU;P…	L3-5IT-1
730	MSigDB_Hallmark_2020__KRAS Signaling Dn	0.203158	1.69403	0.00226757	0.184654	1	52/144	22.48%	IRS4;PTGFR;HSD11B2;LFNG;MEFV;GP1BA;TENT5C;SCGB1A1;MSH5;IFI44L;HTR1B;KLHDC8A;SERPINA10;ITGB1BP2;CHRNG;GRID2;MYH7;CKM;PKP1;TFCP2L1;GPRC5C;ALOX12B;SLC5A5;PAX3;RIBC2;KCNMB1;IL5;TGM1;HNF1A;PCDHB1;EFHD1;TG;CALCB;TEX15;KCNE2;FGFR3;TAS2R4;CNTFR;TGFB2;NUDT11;RYR1;BTG2;MAGIX;IDUA;NOS1;SLC12A3;MX1;ABCG4;MYO15A;SLC29A3;YPEL1;ZNF112	L3-5IT-1
731	GO_Biological_Process_2023__Cell-Cell Junction Organization (GO:0045216)	0.256012	1.69041	0.0021978	0.186415	1	28/62	25.59%	CDH12;PKP1;PKP3;TRPV4;F2R;PCDHGB4;PKHD1;CDH5;CDH3;MARVELD3;PKP2;MARVELD2;TJP2;TJP3;CLDN1;CDH17;GJC1;TGFB2;CDHR3;TGFB3;CDH4;FLCN;TGFB1;SMAD3;MYADM;ARVCF;CDH22;CDH26	L3-5IT-1
732	GO_Cellular_Component_2023__Cell-Substrate Junction (GO:0030055)	-0.174094	-1.68963	0.00170648	0.15824	1	93/378	16.02%	EFS;PTPRC;SHROOM4;SLC4A2;PEAK3;CD9;ACTC1;MMP14;CSPG4;TNC;GRB7;NECTIN2;JUP;TNS1;SPRY4;RND3;ANXA1;PFN1;PLAU;LAYN;RPL19;TM4SF20;PHLDB2;TSPAN4;RPL10A;RPS13;HSPA8;TES;ITGA2;FLNC;EGFR;RPL7A;SMPX;RPL8;RRAS;CAV1;RPL13A;RPS15;RPS18;FES;RPS4X;COL17A1;AIF1L;PGM5;RPS11;RPL9;PPIA;RPS16;RPS10;RPL12;ITGBL1;RPS14;ITGB5;FAT1;RPL3;RPL27;RPS7;DYNLL1;CAT;RPL18;CAV3;MCAM;RPS5;RPS2;RPS3A;RPS9;LCP1;RHOG;NME2;RPLP2;NEDD…	L3-5IT-1
733	GO_Cellular_Component_2023__Focal Adhesion (GO:0005925)	-0.173432	-1.68084	0.00170068	0.161586	1	91/371	16.02%	EFS;PTPRC;SHROOM4;SLC4A2;PEAK3;CD9;ACTC1;MMP14;CSPG4;TNC;GRB7;NECTIN2;JUP;TNS1;SPRY4;RND3;ANXA1;PFN1;PLAU;LAYN;RPL19;TM4SF20;PHLDB2;TSPAN4;RPL10A;RPS13;HSPA8;TES;ITGA2;FLNC;EGFR;RPL7A;RPL8;RRAS;CAV1;RPL13A;RPS15;RPS18;FES;RPS4X;AIF1L;PGM5;RPS11;RPL9;PPIA;RPS16;RPS10;RPL12;ITGBL1;RPS14;ITGB5;FAT1;RPL3;RPL27;RPS7;DYNLL1;CAT;RPL18;CAV3;MCAM;RPS5;RPS2;RPS3A;RPS9;LCP1;RHOG;NME2;RPLP2;NEDD9;KIF23;CAV2;…	L3-5IT-1
734	GO_Biological_Process_2023__Regulation Of Cellular Localization (GO:0060341)	-0.259584	-1.68036	0.00739372	0.161535	1	36/62	38.52%	KRT5;VIP;KHDC3L;PARD6A;RFPL1;OOEP;TRIM67;CAMK2D;TRIM68;RACK1;HSP90AB1;BORA;MMD2;ADCYAP1;TRIM17;HSP90AA1;STX10;GSN;TRIM5;CAMK1;RFPL2;MMD;TESK1;FKBP1A;TRIM25;WWC1;VPS4A;DVL1;REEP5;RAB14;TRIM46;FBXW7;ATCAY;PARP1;PARD6B;RSL1D1	L3-5IT-1
735	GO_Biological_Process_2023__Positive Regulation Of Cytokine Production (GO:0001819)	-0.181673	-1.67938	0.00353357	0.161392	1	75/241	19.67%	STING1;SYK;IL1A;TLR7;CD86;PTPRC;TXK;CRTAM;C3;LAPTM5;LILRB1;PYCARD;PDE4B;ELANE;IRF7;ANXA1;CASP1;RAB7B;PRKCQ;IL23A;INAVA;HLA-E;FCER1G;GAPDH;CHI3L1;CD4;LILRA2;HPSE;NLRP10;WNT5A;CSF1R;GARIN5A;TLR6;SULF2;CD74;EBI3;LGALS9;IL18;HTR2B;IL7;RGCC;NLRP9;AGER;C1QTNF4;LACC1;NOX1;CD80;PTGS2;DDIT3;PHB1;FADD;HLA-A;LCP1;MDK;S100A13;ISG15;TRAF3IP3;PQBP1;HSPA1A;HILPDA;SOD1;HYAL2;IRF5;STOML2;NFAM1;IRAK1;IRF3;LAMTOR5;…	L3-5IT-1
736	MSigDB_Hallmark_2020__Estrogen Response Late	-0.199458	-1.67731	0.00671141	0.162897	1	59/168	22.32%	GAL;TST;KRT19;FRK;DUSP2;CD9;PTGES;CCND1;KLK10;PCP4;TPBG;CDC20;PDLIM3;CCN5;DHRS2;PAPSS2;CA2;CAV1;NMU;GJB3;CXCL12;KLF4;FOS;PLXNB1;SGK1;CDH1;ETFB;MYOF;NXT1;GINS2;CYP26B1;ASCL1;DCXR;ANXA9;MDK;CXCL14;SLC24A3;FABP5;ASS1;ALDH3B1;CKB;TRIM29;NBL1;BAG1;BTG3;XRCC3;ID2;DYNLT3;CCNA1;PERP;COX6C;ST14;DHCR7;PDZK1;GLA;FKBP4;PPIF;SLC2A8;GALE	L3-5IT-1
737	KEGG_2021_Human__Viral carcinogenesis	-0.20332	-1.67545	0.00361664	0.161723	1	76/166	35.27%	SYK;EGR2;H4C3;C3;STAT5A;PMAIP1;H2BC11;H4C4;CCND1;CCR3;SCIN;IRF7;CDC20;HLA-E;CDKN2A;LYN;H2BC21;H2BC15;CDK1;H2BC4;TBPL2;H4C5;HRAS;HLA-A;PIK3R3;LTBR;HPN;HLA-B;BAK1;HLA-C;CREB3L1;CREB5;H4C8;IRF3;YWHAH;PIK3R2;RANBP1;ATF4;CCNA1;HDAC10;CREB3;HDAC1;TRADD;BAD;JUN;BAX;CASP8;TRAF5;GSN;YWHAB;CDK4;CCNE2;IKBKG;TP53;RAC1;GTF2E1;RHOA;SCRIB;RELA;MRPS18B;ATP6V0D1;TRAF2;NRAS;HDAC11;SRF;CDKN1B;PKM;HDAC5;CREB3L2;CDK6…	L3-5IT-1
738	GO_Biological_Process_2023__Positive Regulation Of Intracellular Signal Transduction (GO:1902533)	-0.166445	-1.66981	0	0.164169	1	158/455	25.98%	ADRA1D;CX3CR1;LPAR1;ANGPT1;ART4;TLR7;PDGFRA;CD86;LGALS1;PTPRC;KDR;SOX11;LRP2;CASP10;TIFA;EDA2R;LAPTM5;PMAIP1;PYCARD;SEMA3E;TNFSF10;POMC;S100B;TNFRSF1A;CASP1;PIK3R5;LITAF;HCST;GPR37;IGF1;SEMA5A;IL23A;BST2;PRKD1;INAVA;GAPDH;CHI3L1;EGFR;MUSK;EGF;BMP6;KIT;PIK3AP1;CAV1;CD4;RPS15;HPSE;LYN;SELP;WNT5A;RFPL1;TRIM56;TLR6;CD74;LGALS9;PDGFD;DDR1;PPIA;IL18;HTR2B;GCNT2;PLXNB1;AGER;RRAGA;GPRC5B;C1QTNF4;TCIM;GPR…	L3-5IT-1
739	GO_Biological_Process_2023__Positive Regulation Of Endothelial Cell Migration (GO:0010595)	-0.245489	-1.6675	0.00902527	0.164746	1	35/77	29.30%	ANGPT1;KDR;ETS1;STAT5A;RIN2;SMOC2;ANXA3;GFUS;SEMA5A;MET;PRKD1;EGF;RRAS;NOS3;WNT5A;PSG1;TMSB4X;FGF1;SPARC;NELL1;ZNF580;CALR;HSPB1;EDN1;THBS1;FGFR1;ATP5F1B;RHOB;GRN;PDGFB;RAC1;ATP5F1A;PRKD2;PDCD6;EMC10	L3-5IT-1
740	WikiPathway_2023_Human__Myometrial Relaxation And Contraction Pathways WP289	-0.209107	-1.66677	0.00718133	0.164933	1	46/141	21.05%	CRH;RGS1;LPAR1;GNG3;RAMP2;RGS10;RGS18;ACTC1;PDE4B;GNG13;GNG4;RGS20;ATF5;PRKCQ;PRKD1;GNG11;NOS3;GNGT1;RGS16;GNG8;FOS;RGS19;ACTA1;ACKR3;CALM2;PKIB;ADCY8;MAFF;IGFBP6;ADCY7;CALM3;CAMK2D;RGS4;ACTA2;GNB4;RGS14;RAMP3;YWHAH;IGFBP2;CALM1;ATF4;CREB3;PRKCD;ACTG1;JUN;PRKCG	L3-5IT-1
741	GO_Biological_Process_2023__Negative Regulation Of Apoptotic Process (GO:0043066)	-0.169263	-1.6632	0.00165563	0.164509	1	165/398	32.84%	CX3CR1;CIDEA;ANGPT1;AVP;KDR;FOXO1;VIP;TOX3;SFRP1;LRP2;TNFRSF10D;SEMA3E;PRDX5;DDAH2;NOTCH1;KHDC3L;MAG;ANXA1;FGF20;ATF5;NUGGC;MYC;BCL2L10;RPL10;LEF1;CLCF1;SMAD6;IGF1;EVI2B;CRYAB;APOH;EGFR;BDNF;PRELID1;DHRS2;PRDX2;HMGA2;CAV1;GREM1;WNT5A;TENT5B;HIGD2A;KLF4;CD74;ERBB4;NGF;NCKAP1L;CIB1;MIEN1;HTR2B;IL7;GSTP1;TCIM;CAT;FZD9;THOC6;GHRL;CDK1;BARD1;ASCL1;TMBIM4;RPS3A;IER3;PIK3R3;MDK;BCL3;SOX8;NME2;CDKN2D;PRR…	L3-5IT-1
742	GO_Biological_Process_2023__Extracellular Structure Organization (GO:0043062)	-0.23306	-1.65204	0.00769231	0.171497	1	31/87	17.84%	COL22A1;COL3A1;TGFBI;CCDC80;COL9A2;MMP14;COL4A5;NPNT;HPSE2;SMOC2;COL24A1;ADAMTS18;MATN1;COL17A1;ADAMTS20;PXDN;COL9A3;ADAMTS4;ADAMTS1;ADAMTS9;VIT;COL9A1;COL5A2;COL19A1;MARCOL;MMP15;ECM2;COL11A1;COL10A1;ADAMTSL4;MATN2	L3-5IT-1
743	KEGG_2021_Human__Transcriptional misregulation in cancer	-0.207065	-1.6512	0.00714286	0.171921	1	47/144	21.11%	ETV1;CD86;FOXO1;LYL1;TGFBR2;H3C6;JUP;DUSP6;ELANE;ERG;PLAU;MYC;IGF1;MET;ETV5;PER2;HMGA2;ITGAM;LMO2;GADD45G;CSF1R;NR4A3;PBX3;PLAT;SLC45A3;DDIT3;RUNX2;H3C1;BCL11B;GADD45B;FLT1;BAK1;GADD45A;EYA1;MYCN;CDKN2C;NTRK1;CEBPA;H3-3B;ID2;CCNA1;HDAC1;KLF3;PAX5;TSPAN7;BAX;CD14	L3-5IT-1
744	WikiPathway_2023_Human__Neural Crest Differentiation WP2064	-0.236817	-1.64552	0.0077821	0.173261	1	29/79	20.81%	ZIC5;ETS1;HEY2;GJB1;SOX10;NOTCH1;WNT3A;HES1;CDH6;OLIG2;MYC;HES5;OLIG1;FGF8;TCF7L1;CDH1;ID1;BMP7;DLL3;ASCL1;NOTCH3;NOTCH4;MBP;CDH7;MPZ;HDAC10;HDAC1;FGFR1;PMP22	L3-5IT-1
745	GO_Biological_Process_2023__Positive Regulation Of Peptidyl-Tyrosine Phosphorylation (GO:0050731)	-0.226861	-1.63086	0.00886525	0.183309	1	28/95	13.69%	ANGPT1;PTPRC;NOX4;CSPG4;HES1;TNFRSF1A;CLCF1;IGF1;IL23A;HES5;GHR;BMP6;ENPP2;KIT;GREM1;LYN;CSF1R;CD74;ERBB4;IL18;VTN;GPRC5B;CD80;RELN;PARP14;CTF1;NEDD9;NELL1	L3-5IT-1
746	MSigDB_Hallmark_2020__UV Response Up	-0.204243	-1.63032	0.00547445	0.182848	1	79/150	36.08%	GAL;TST;MMP14;ONECUT1;PDLIM3;TACR3;NPTX2;CA2;SELENOW;ATP6V1F;LYN;FOS;TUBA4A;CCK;APOM;PSMC3;SPR;JUNB;HSPA2;ABCB1;BID;AP2S1;BAK1;MRPL23;ALDOA;BMP2;HYAL2;GPX3;FEN1;CNP;SLC25A4;BTG3;IGFBP2;ALAS1;H2AX;UROD;PRKCD;SIGMAR1;YKT6;FKBP4;ENO2;PPIF;GRINA;POLE3;CYB5R1;RHOB;NPTXR;CDC34;NR4A1;GRPEL1;POLR2H;PDAP1;DNAJA1;RXRB;EIF5;CLTB;IRF1;BSG;ACAA1;DGAT1;FURIN;OLFM1;MAPK8IP2;CEBPG;ASNS;CHKA;HSPA13;AMD1;KLHDC3;TA…	L3-5IT-1
747	GO_Biological_Process_2023__Negative Regulation Of Transmembrane Receptor Protein Serine/Threonine Kinase Signaling Pathway (GO:0090101)	-0.224662	-1.63006	0.00724638	0.182654	1	34/99	21.75%	CIDEA;LRP2;NOTCH1;DLX1;BAMBI;EMILIN1;SPRY1;SMAD6;SINHCAF;CAV1;GREM1;CCN3;SPRED3;STUB1;DAND5;SPRED1;FAM89B;TNFAIP6;HSPA1A;VASN;VWC2L;NBL1;BMP2;CHRD;SPRY2;HTRA4;EID2;ASPN;HDAC1;BRMS1;SPRED2;SAP30;FSTL3;PRDM16	L3-5IT-1
748	GO_Biological_Process_2023__Extracellular Matrix Organization (GO:0030198)	0.195366	1.62065	0.00660793	0.225393	1	45/144	16.10%	LOXL1;OTOL1;COL8A2;COL27A1;HAS3;MMP11;ADAMTS15;MMP19;SMOC1;TMPRSS6;HAS2;ADAMTS14;ADAMTS5;MMP26;ADAMTS2;SERPINH1;ADAMTS12;SERPINF2;CYP1B1;ADAMTS7;NID2;COL15A1;COL8A1;COL13A1;COL4A6;ADAMTS6;ELN;MATN4;COL5A3;SPINK5;KLK5;SCX;ADAMTS16;COL18A1;THSD4;MANSC4;COL14A1;COL7A1;NOXO1;DDR2;LOXL2;P3H4;TGFB2;SPINT1;MMP28	L3-5IT-1
749	GO_Cellular_Component_2023__Platelet Alpha Granule (GO:0031091)	-0.237356	-1.61928	0.00899281	0.188589	1	26/73	19.98%	ISLR;CD9;VEGFC;IGF1;EGF;PCDH7;SELP;THBS2;TMSB4X;MMRN1;SYTL4;PLG;AHSG;SPARC;SRGN;KNG1;SERPINE2;ALDOA;F5;A2M;MAGED2;VWF;VPS33B;VEGFB;THBS1;CLU	L3-5IT-1
750	MSigDB_Hallmark_2020__Allograft Rejection	-0.203935	-1.61262	0.00896057	0.190077	1	50/144	21.15%	FYB1;IRF8;CD86;PTPRC;GPR65;ETS1;CRTAM;INHBA;ELANE;IRF7;EIF5A;HLA-E;EGFR;CDKN2A;CD4;GBP2;LYN;NME1;TLR6;CD74;ELF4;RPL9;IL18;IL7;ICOSLG;CD80;CAPG;LY86;RPS3A;RPS9;HLA-A;BCL3;ST8SIA4;ACHE;SRGN;PSMB10;B2M;RPS19;THY1;RPL39;IL27RA;IGSF6;F2;ITGAL;FAS;IL12RB1;CD8B;PRKCG;WAS;STAT1	L3-5IT-1
751	KEGG_2021_Human__Shigellosis	-0.182433	-1.611	0.00352113	0.19036	1	104/217	39.18%	STING1;FOXO1;C3;MYL9;TIFA;PYCARD;DOCK1;HK2;H3C6;RPS27A;TNFRSF1A;CASP1;PFN1;PRKCQ;UBB;EGFR;MYL12A;IL18;GABARAPL2;RRAGA;UBA52;MYL7;MYL12B;FOXO4;GABARAP;U2AF1L4;CYCS;H3C1;PIK3R3;PFN4;MYL5;ARPC5;ARPC4;UBC;PLCB2;ARPC3;IRF3;ARPC5L;PIK3R2;H3-3B;AKT1S1;CAPNS1;TRADD;PFN2;ARPC1B;ARPC1A;PLCE1;PRKCD;ACTG1;NLRC4;JUN;BAX;CD14;NOD1;TRAF5;MAPK12;ITGA5;RPS6KB2;ILK;CYTH2;GSK3A;BNIP3;IKBKG;ACTB;NFKBIB;TP53;SHARPIN;…	L3-5IT-1
752	WikiPathway_2023_Human__VEGFA VEGFR2 Signaling WP3888	-0.163115	-1.60536	0.00340716	0.194809	1	241/405	47.34%	TAL1;SDF2L1;CCN1;FJX1;KDR;ETS1;FOXO1;CCN2;MMP14;TMSB10;NOX4;CCND1;SHB;ANXA1;ERG;PFN1;PLAU;CLIC1;CHAC1;RPL26;RPL10A;PRKD1;SSR4;GAPDH;TRPC3;PRDX2;BMX;RPL18A;CYBB;CAV1;RPL13A;NOS3;NR4A3;SH3BGRL3;PLA2G5;TMSB4X;NFATC2;RPS11;JAG1;QKI;ITGB5;ADAMTS1;RPL27;FOXO4;ADAMTS9;KANK1;PTGS2;DUSP5;HTRA1;FADD;CYCS;ACKR3;LDHA;HRAS;RCN1;RPLP2;PTPRZ1;RPL7;NOTCH4;CFL1;AP2S1;FLT1;HSPA1A;RCAN1;SELE;ALDOA;IGFBP7;BMP2;SLC25…	L3-5IT-1
753	GO_Molecular_Function_2023__Sequence-Specific Double-Stranded DNA Binding (GO:1990837)	0.151612	1.60238	0	0.232898	1	166/494	25.85%	LMX1B;TBX2;MCM10;FIGLA;RFX6;EMX2;NHLH2;ZIC1;PTF1A;TBX6;HES7;TBX1;RORC;NFATC4;POU2F3;PROX1;SNAI2;TBX19;ZIC4;MAF;SOX13;DRGX;RXRG;DMRTA2;SIX4;PAX6;GLI3;ZNF296;ADRA2A;PRRX2;SNAI1;TBX15;MYBL2;FOXA3;DMRT3;YAP1;TFCP2L1;FLI1;DLX4;ETV7;ZNF501;MEOX2;ELF3;E2F7;NR1I3;IRF4;MEOX1;PAX3;RHOXF1;LHX1;RHOXF2;POU3F1;TFEC;CREB3L4;NHLH1;PAX2;ORC1;SKOR1;PAX8;FOXH1;MNX1;CDC6;GCM2;SCRT2;NANOG;CRX;FOSB;RFX5;FOXQ1;TFEB;HNF…	L3-5IT-1
754	GO_Cellular_Component_2023__Endoplasmic Reticulum Lumen (GO:0005788)	-0.176881	-1.58691	0.00168067	0.20741	1	84/242	24.21%	COL22A1;COL3A1;PENK;LGALS1;VCAN;VGF;C3;ARSJ;COL9A2;COL6A2;APOB;COL4A5;TNC;WNT3A;TSPO;MXRA8;MEPE;WNT6;SELENOM;COL24A1;ADAMTSL1;IL23A;VWA1;ARSI;BDNF;WNT5A;COL17A1;EBI3;PDGFD;ARSD;SPP1;COL9A3;ARSL;WNT4;SERPIND1;PTGS2;GHRL;COL9A1;CP;AHSG;LIPC;CASQ1;KNG1;COL4A4;COL5A2;COL19A1;B2M;RCAN1;APOE;SPON1;IGFBP7;MFGE8;PDIA5;F5;TOR2A;COL11A1;MTTP;JMJD8;COL10A1;MANF;ADAMTSL4;F2;FGF23;TSPAN15;CST3;CALR;CHGB;HSPA5…	L3-5IT-1
755	GO_Biological_Process_2023__Positive Regulation Of Cell Population Proliferation (GO:0008284)	-0.160375	-1.58497	0	0.207673	1	127/396	23.23%	ADRA1D;INSM1;PDGFRA;CD86;PTPRC;KDR;S1PR2;VIP;ITGAX;SFRP1;SOX11;TERT;TGFBR2;SLC25A5;NOTCH1;WNT3A;S100B;HES1;ELANE;VEGFC;MEIS2;FGF20;BAMBI;SFRP2;MYC;CDCA7L;LEF1;CLCF1;IGF1;BST2;HES5;SINHCAF;EGFR;EGF;BMP6;ROMO1;ZNF703;HMGA2;GREM1;FGF6;HPSE;LYN;WNT5A;RPS4X;NME1;EGR4;CSF1R;FGF8;MEGF10;PRTN3;NR4A3;CD74;ERBB4;PDGFD;CIB1;COPS9;CLDN5;IL18;HTR2B;GCNT2;IL7;S100A6;EDN3;NOX1;PTHLH;TGFA;PRC1;FZD9;SOX4;EPOR;FGF…	L3-5IT-1
756	GO_Biological_Process_2023__Negative Regulation Of Programmed Cell Death (GO:0043069)	-0.164614	-1.57071	0.00516351	0.216284	1	97/328	22.41%	ANGPT1;AVP;KDR;FOXO1;VIP;SFRP1;LRP2;LAPTM5;TNFRSF10D;PRDX5;DDAH2;GPX4;KHDC3L;SLC7A11;ANXA1;ATF5;NUGGC;MYC;BCL2L10;RPL10;LEF1;SMAD6;IGF1;MET;EVI2B;CRYAB;EGFR;PRELID1;DHRS2;PRDX2;HMGA2;GREM1;WNT5A;TENT5B;HIGD2A;CD74;ERBB4;NCKAP1L;CIB1;MIEN1;HTR2B;IL7;GSTP1;TCIM;CAT;AMIGO2;THOC6;PSMC5;GHRL;CDK1;BARD1;ASCL1;TMBIM4;RPS3A;IER3;BCL3;SOX8;NME2;PRR5;CARD14;CFL1;SOCS2;HPN;TRIAP1;HSPA1A;MT3;HAX1;SPRY2;BAG1;…	L3-5IT-1
757	GO_Cellular_Component_2023__Mitochondrial Matrix (GO:0005759)	-0.163697	-1.56745	0.00492611	0.218098	1	183/338	43.77%	ACSM5;NDUFA7;TST;NAGS;ALKBH7;ATP5F1E;PRDX5;KRT17;ATP5F1D;MRPS12;NUDT1;HSPE1;NDUFB8;BLOC1S1;MRPL51;HSD17B10;HOGA1;ACSM4;HSD17B8;SCO2;ACSS1;ERBB4;TYMS;NDUFAB1;OXCT2;GADD45GIP1;MRPL40;BCKDK;ETFB;CDK1;ACADL;MRPL28;MRPL20;C1QBP;FDXR;PYCR1;CYP27A1;CASQ1;SARS2;AMT;MPST;PCK2;FOXO3B;ALDH4A1;TRMT10C;SMDT1;TWNK;LIPT2;ACAA2;MRPL34;NDUFS3;ARL2;SOD1;MRPL57;IDH3G;PAM16;FDX2;MRPL43;ALDH1B1;NDUFS7;ADHFE1;ACSM6;IS…	L3-5IT-1
758	GO_Biological_Process_2023__Regulation Of Cell Migration (GO:0030334)	-0.159234	-1.55321	0.00158228	0.228929	1	82/385	13.36%	SST;KRT5;CLDN3;PDGFRA;CORT;KDR;DUSP10;ROBO1;ITGAX;DAAM2;GPNMB;SFRP1;CSRP3;SEMA3E;DACH1;STK26;DOCK10;MMP14;TMSB10;TNC;NOTCH1;GRB7;SMIM22;ANGPTL3;TMIGD3;ANXA1;FGF20;ROBO4;PLAU;TMSB4Y;SFRP2;EMILIN1;LEF1;LGR6;IGF1;SEMA5A;BST2;TWIST2;SINHCAF;EGFR;EGF;ENPP2;ARHGAP4;KIT;ZNF703;CAV1;FGF6;CLIC4;PLEKHG3;EMILIN2;CSF1R;FGF8;CXCL12;SEMA3C;CDH11;CD74;ERBB4;TMSB4X;PDGFD;SEMA5B;CIB1;CLDN5;MIEN1;RHOD;GCNT2;PLXNB1…	L3-5IT-1
759	MSigDB_Hallmark_2020__mTORC1 Signaling	-0.183714	-1.54305	0.00841751	0.235176	1	123/196	46.59%	SDF2L1;CD9;ATP5MC1;HK2;HSPE1;SLC7A11;EEF1E1;GAPDH;TES;TPI1;TUBA4A;PPIA;BUB1;SCD;TUBG1;DDIT3;LDHA;FDXR;PIK3R3;RRM2;PHGDH;PRDX1;FKBP2;TM7SF2;ALDOA;SLC37A4;CORO1A;LDLR;ARPC5L;IDI1;CALR;MTHFD2;HSPA5;EBP;PPP1R15A;DHCR7;ABCF2;YKT6;RRP9;GLA;HMBS;TMEM97;DDX39A;VLDLR;GOT1;SQLE;PSMB5;CACYBP;SLC2A1;MLLT11;MCM4;HMGCS1;G6PD;ENO1;PDAP1;TRIB3;CYP51A1;NFKBIB;PSMA4;PSMC4;XBP1;INSIG1;PPA1;STARD4;ATP6V1D;PSAT1;BHLH…	L3-5IT-1
760	GO_Biological_Process_2023__Negative Regulation Of Cellular Process (GO:0048523)	-0.150634	-1.52701	0.00337838	0.247817	1	110/463	17.23%	SST;ADRA1D;MYOCD;ANGPT1;IL1A;CLDN3;INSM1;ST18;TGFBI;AZGP1;ETS1;CCN2;GPNMB;SFRP1;DCSTAMP;LILRB1;MYO16;PLAAT4;CHMP2A;CD33;NOX4;INHBA;NOTCH1;SCIN;NDUFA13;TMIGD3;GNG4;ATF5;SFRP2;EMILIN1;MYC;SMAD6;SEMA5A;BST2;EEF1E1;CCN5;CRYAB;SINHCAF;CDT1;TES;H2AC8;S100A11;DHRS2;SFRP4;CDKN2A;ADAMDEC1;SH3BP4;LYN;NOS3;TENT5B;RFPL1;NME1;ARHGDIG;GMNC;FABP6;WNT9A;ERBB4;NGF;NUPR2;CIB1;PLXNB1;CCDC85B;ALOX5;RERG;CCN3;RGCC;FB…	L3-5IT-1
761	GO_Biological_Process_2023__Cellular Response To Cytokine Stimulus (GO:0071345)	0.163662	1.50858	0.00913242	0.281768	1	67/216	21.02%	GBP5;GBP6;MME;TNFSF11;TLR2;IFI16;CSF3R;HLA-DPA1;IL21R;IL11RA;IRGM;TLR4;FLT3;HAS2;GBP1;ZFP36;IL23R;IFITM2;ADAMTS12;ADAMTS7;HCLS1;IRAK3;LDLRAP1;CCL5;IFNE;FOXH1;PRLR;ALOX15;EREG;AXL;MT1X;PLP2;PTPN6;NLRP12;CD40;YBX3;IL13RA2;HCK;GBP3;SLC26A6;GPER1;ASAH2;IL4R;GBP4;GREM2;OSMR;IL5RA;IL2RB;IL6R;MYLK3;LEPR;MT2A;AQP4;STAT4;SHMT1;SHPK;MAPK13;NFKBIA;DAPK1;CACTIN;CDK9;SOX9;LIFR;TCF7;RIPOR2;IRAK4;NR1D1	L3-5IT-1
762	GO_Biological_Process_2023__Positive Regulation Of Cellular Process (GO:0048522)	-0.145156	-1.47225	0.00335008	0.282784	1	143/482	23.36%	ADRA1D;TAL1;HPR;EGR2;EXOSC4;INSM1;PDGFRA;CD86;KDR;S1PR2;VIP;CCN2;ITGAX;HBA1;SFRP1;DNPH1;PHPT1;TGFBR2;MMP14;SLC25A5;NOTCH1;WNT3A;S100B;DLX1;MYRF;HES1;VEGFC;MEIS2;FGF20;BAMBI;SFRP2;MYC;PARD3;CDCA7L;LEF1;CLCF1;IGF1;HES5;SINHCAF;EGFR;EGF;BMP6;ROMO1;ZNF703;CAV1;GREM1;FGF6;LILRA2;LYN;RPS4X;EGR4;CSF1R;FGF8;CXCL12;ECHDC3;NCMAP;PRTN3;ERBB4;FKBP1B;PDGFD;HBB;ZFP36L1;CIB1;COPS9;CLDN5;HTR2B;RHOD;GCNT2;IL7;EDN…	L3-5IT-1
763	KEGG_2021_Human__Pathways in cancer	-0.146926	-1.47048	0.00673401	0.284354	1	130/458	21.60%	LPAR1;PDGFRA;GNG3;ETS1;FOXO1;HEY2;LPAR3;TERT;STAT5A;PMAIP1;TGFBR2;COL4A5;NOTCH1;WNT3A;CCND1;HES1;JUP;GNG13;VEGFC;GNG4;FGF20;ELOB;MYC;WNT6;LEF1;FZD7;WNT8B;IGF1;HEYL;MET;IL23A;IL13RA1;HES5;ITGA2;EGFR;EGF;CDKN2A;GNG11;EDNRA;KIT;FGF6;WNT5A;GNGT1;GADD45G;CSF1R;FGF8;CXCL12;EDNRB;TCF7L1;GNG8;WNT9A;FOS;DAPK2;IL7;JAG1;GSTP1;CDH1;TGFA;WNT4;FZD9;PTGS2;EPOR;FGF1;CKS2;FRAT2;FADD;CYCS;CALM2;FLT3LG;DLL3;NOTCH3;…	L3-5IT-1
764	GO_Biological_Process_2023__Cytoplasmic Translation (GO:0002181)	-0.656294	-4.47775	0	0	0	78/92	24.47%	RPS27A;RPL26;RPS18;RPL10A;FAU;RPL19;RPL12;RPL41;RPL35;RPL36AL;RPL18A;RPL7A;RPS7;RPS26;RPL10;RPS15;RPL21;RPS3A;RPL32;RPL29;RPS10;RPL13A;RPS4X;RPS13;RPS23;RPL3;RPS9;RPS14;RPL8;RPS16;RPS21;RPS5;MRPS12;RPLP2;RPS15A;RPL35A;UBA52;RPL36;RPS11;RPL18;RPL9;RPS28;RPS2;RPL6;RPS27;RPLP1;RPL27;RPL13;RPL28;RPL24;RPL39;RPS17;RPL11;RPL38;RPL23A;RPL27A;RPS19;RPL7;RPS6;RPS25;RPL15;RPLP0;RPL14;RPL34;EIF4A2;RPS8;RPL2…	L3-5IT-3
765	KEGG_2021_Human__Ribosome	-0.601804	-4.46048	0	0	0	102/130	25.68%	RPS27A;RPL26;RPS18;MRPL12;RPL10A;MRPL36;FAU;RPL19;RPL12;RPL41;RPL35;RPS12;MRPL28;RPL36AL;RPL18A;RPL7A;RPS7;RPS26;RPL10;RPS15;RPL21;RPS3A;RPL32;RPL29;RPS10;RPL13A;RPS4X;RPS13;RPS23;RPL3;RPS9;RPS14;RPL8;RPS16;RPS21;RPS5;MRPS12;RPLP2;RPS15A;RPL35A;UBA52;RPL36;RPS11;RPL18;RPL9;MRPL34;RPS28;RPS2;RPL6;RPS27;MRPL23;RPLP1;RPL27;RPL23;RPL13;MRPL17;MRPS17;RPL28;RPL24;RPL39;RPS17;RPL11;RPL38;RPL23A;RPL27A;M…	L3-5IT-3
766	WikiPathway_2023_Human__Cytoplasmic Ribosomal Proteins WP477	-0.661135	-4.42435	0	0	0	74/87	24.47%	RPS27A;RPL26;RPS18;RPL10A;FAU;RPL19;RPL12;RPL41;RPL35;RPS12;RPL18A;RPL7A;RPS7;RPS26;RPL10;RPS15;RPL21;RPS3A;RPL32;RPL29;RPS10;RPL13A;RPS4X;RPS13;RPS23;RPL3;RPS9;RPS14;RPL8;RPS16;RPS21;RPS5;RPLP2;RPS15A;RPL35A;UBA52;RPL36;RPS11;RPL18;RPL9;RPS28;RPS2;RPL6;RPS27;RPLP1;RPL27;RPL23;RPL13;RPL28;RPL24;RPL39;RPS17;RPL11;RPL38;RPL23A;RPL27A;RPS19;RPL7;RPS4Y1;RPS6;RPS25;RPL15;RPLP0;RPL14;RPL34;RPS8;RPL30;R…	L3-5IT-3
767	GO_Biological_Process_2023__Peptide Biosynthetic Process (GO:0043043)	-0.553066	-4.18557	0	0	0	103/145	25.68%	RPS27A;RPL26;RPS18;MRPL12;RPL10A;MRPL36;FAU;RPL19;RPL12;RPL41;RPL35;MRPL28;RPL36AL;RPL18A;RPL7A;RPS7;RPS26;RPL10;RPS15;RPL21;RPS3A;RPL32;RPL29;RPS10;RPL13A;RPS4X;RPS13;MRPL55;RPS23;RPL3;RPS9;RPS14;RPL8;RPS16;RPS21;RPS5;MRPS12;RPLP2;RPS15A;RPL35A;MRPL51;RPL36;RPS11;CARNS1;PCSK5;RPL18;RPL9;MRPL34;RPS28;RPS2;RPL6;RPS27;MRPL23;RPLP1;GGT5;RPL27;RPL13;MRPS17;RPL28;RPL24;RPL39;RPS17;RPL11;RPL38;RPL23A;R…	L3-5IT-3
768	GO_Cellular_Component_2023__Large Ribosomal Subunit (GO:0015934)	-0.699289	-3.99614	0	0	0	44/48	24.47%	RPL26;RPL10A;RPL19;RPL12;RPL41;RPL35;RPL36AL;RPL18A;RPL7A;RPL21;RPL32;RPL29;RPL13A;RPL3;RPL8;RPLP2;RPL35A;UBA52;RPL36;RPL18;RPL9;RPL6;RPLP1;RPL27;RPL13;RPL28;RPL24;RPL39;RPL39L;RPL11;RPL38;RPL23A;RPL27A;RPL7;RPL15;RPLP0;RPL14;RPL34;RPL26L1;RPL30;RPL31;RPL4;RPL17;RPL5	L3-5IT-3
769	GO_Cellular_Component_2023__Cytosolic Large Ribosomal Subunit (GO:0022625)	-0.699289	-3.99614	0	0	0	44/48	24.47%	RPL26;RPL10A;RPL19;RPL12;RPL41;RPL35;RPL36AL;RPL18A;RPL7A;RPL21;RPL32;RPL29;RPL13A;RPL3;RPL8;RPLP2;RPL35A;UBA52;RPL36;RPL18;RPL9;RPL6;RPLP1;RPL27;RPL13;RPL28;RPL24;RPL39;RPL39L;RPL11;RPL38;RPL23A;RPL27A;RPL7;RPL15;RPLP0;RPL14;RPL34;RPL26L1;RPL30;RPL31;RPL4;RPL17;RPL5	L3-5IT-3
770	GO_Biological_Process_2023__Translation (GO:0006412)	-0.463174	-3.80523	0	0	0	132/225	25.68%	RPS27A;RPL26;RPS18;MRPL12;RPL10A;MRPL36;FAU;RPL19;RPL12;RPL41;RPL35;MRPL28;RPL36AL;AURKAIP1;EIF5A;RPL18A;RPL7A;EEF1B2;RPS7;RPS26;NDUFA7;RPL10;RPS15;RPL21;GADD45GIP1;RPS3A;RPL32;RPL29;RPS10;RPL13A;RPS4X;RPS13;MRPL40;MRPL55;RPS23;RPL3;RPS9;RPS14;RPL8;RPS16;RPS21;RPS5;MRPL54;MRPS12;RPLP2;RPS15A;RPL35A;UBA52;MRPL51;MRPS34;RPL36;MRPS28;RPS11;RPL18;RPL9;MRPL34;RPS28;RPS2;RPL6;RPS27;MRPL23;RPLP1;RPL27;R…	L3-5IT-3
771	GO_Biological_Process_2023__Macromolecule Biosynthetic Process (GO:0009059)	-0.480521	-3.76969	0	0	0	111/173	26.67%	RPS27A;RPL26;RPS18;MRPL12;RPL10A;MRPL36;FAU;RPL19;RPL12;RPL41;RPL35;TYMS;MRPL28;RPL36AL;EIF5A;RPL18A;RPL7A;EEF1B2;RPS7;RPS26;RPL10;RPS15;RPL21;RPS3A;RPL32;RPL29;COL5A1;RPS10;RPL13A;RPS4X;RPS13;MRPL55;RPS23;RPL3;RPS9;RPS14;RPL8;RPS16;RPS21;RPS5;MRPS12;RPLP2;RPS15A;RPL35A;MRPL51;RPL36;RPS11;RPL18;RPL9;MRPL34;RPS28;RPS2;RPL6;RPS27;MRPL23;RPLP1;RPL27;RPL13;MRPS17;RPL28;RPL24;RPL39;RPS17;B4GAT1;RPL11;…	L3-5IT-3
772	GO_Cellular_Component_2023__Cytosolic Small Ribosomal Subunit (GO:0022627)	-0.706025	-3.69547	0	0	0	33/37	22.75%	RPS27A;RPS18;FAU;RPS7;RPS26;RPS15;RPS3A;RPS10;RPS4X;RPS13;RPS23;RPS9;RPS14;RPS16;RPS21;RPS5;MRPS12;RPS15A;UBA52;RPS11;RPS28;RPS2;RPS27;RPS17;RPS19;RPS4Y1;RPS6;RPS25;RPS8;RACK1;RPSA;RPS24;RPS20	L3-5IT-3
773	WikiPathway_2023_Human__Electron Transport Chain OXPHOS System In Mitochondria WP111	-0.55578	-3.69121	0	0	0	64/89	26.70%	UCP1;COX8A;SLC25A5;NDUFB10;ATP5MF;COX6A1;ATP5MC1;COX7A1;NDUFA13;ATP5ME;ATP5F1D;COX5B;NDUFB8;NDUFA2;COX7C;COX4I1;NDUFA7;ATP5F1E;NDUFB2;NDUFC2;UQCRQ;ATP5PO;NDUFA4;ATP5PD;UQCR10;COX6B1;UQCRFS1;ATP5MC3;ATP5IF1;NDUFA11;UQCRB;NDUFB7;ATP5PF;UQCR11;NDUFS5;NDUFA3;NDUFB3;NDUFA1;COX7A2;NDUFS8;SURF1;COX7B;NDUFA6;NDUFS3;UQCRH;NDUFS6;SLC25A4;COX5A;ATP5F1B;NDUFS7;NDUFAB1;NDUFA12;COX6C;NDUFA8;NDUFS2;NDUFC1;UQCRC…	L3-5IT-3
774	GO_Cellular_Component_2023__Ribosome (GO:0005840)	-0.622324	-3.65914	0	0	0	40/57	20.23%	RPS18;RPL10A;RPL19;RPL41;RPL36AL;RPL18A;RPL7A;RPS7;RPS26;RPL32;RPS10;RPL13A;RPS4X;RPS13;RPS23;RPS9;RPL8;RPS21;RPS5;MRPS12;RPL36;RPS11;RPL18;RPL9;RPS28;RPL6;RPS27;RPL27;RPL24;RPL39;RPS17;RPL11;RPL38;RPS19;RPS25;MRPS7;RPL15;BTF3;RPL30;RPL31	L3-5IT-3
775	GO_Cellular_Component_2023__Small Ribosomal Subunit (GO:0015935)	-0.686131	-3.6048	0	0	0	33/38	22.75%	RPS27A;RPS18;FAU;RPS7;RPS26;RPS15;RPS3A;RPS10;RPS4X;RPS13;RPS23;RPS9;RPS14;RPS16;RPS21;RPS5;MRPS12;RPS15A;UBA52;RPS11;RPS28;RPS2;RPS27;RPS17;RPS19;RPS4Y1;RPS6;RPS25;RPS8;RACK1;RPSA;RPS24;RPS20	L3-5IT-3
776	KEGG_2021_Human__Oxidative phosphorylation	-0.501612	-3.55846	0	0	0	78/111	30.62%	COX8A;NDUFB11;NDUFB10;ATP5MF;COX6A1;ATP5MC1;COX7A1;NDUFA13;ATP5ME;ATP5F1D;COX5B;NDUFB8;NDUFA2;ATP6V0C;COX7C;COX4I1;NDUFA7;ATP5F1E;NDUFB2;NDUFC2;ATP12A;UQCRQ;ATP5PO;NDUFA4;ATP5PD;ATP6V1F;CYC1;UQCR10;COX6B1;UQCRFS1;ATP5MC3;ATP6V0B;NDUFA11;UQCRB;NDUFB7;ATP5PF;UQCR11;NDUFS5;ATP6AP1;NDUFA3;NDUFB3;ATP6V0D2;ATP6V1G2;NDUFA1;COX7A2;NDUFS8;COX7B;NDUFA6;NDUFS3;UQCRH;NDUFS6;COX5A;ATP5F1B;NDUFS7;NDUFAB1;NDUFA…	L3-5IT-3
777	GO_Biological_Process_2023__Aerobic Electron Transport Chain (GO:0019646)	-0.570309	-3.51888	0	0	0	50/64	29.59%	COX8A;NDUFB10;COX6A1;COX5B;NDUFB8;NDUFA2;COX7C;COX4I1;NDUFA7;NDUFB2;NDUFC2;UQCRQ;NDUFA4;CYC1;UQCR10;COX6B1;UQCRFS1;UQCC3;UQCRB;NDUFB7;UQCR11;NDUFS5;NDUFA3;NDUFB3;NDUFA1;CYCS;COX7A2;NDUFS8;COX7B;NDUFA6;NDUFS3;UQCRH;NDUFS6;COX5A;NDUFS7;NDUFAB1;COX6C;NDUFA8;NDUFS2;NDUFC1;UQCRC1;SDHAF2;NDUFV1;NDUFB5;NDUFB4;NDUFB9;NDUFV2;SDHA;SLC25A51;NDUFA9	L3-5IT-3
778	KEGG_2021_Human__Coronavirus disease	-0.439812	-3.51199	0	0	0	110/186	24.47%	C1QB;RPS27A;SYK;RPL26;RPS18;EGFR;RPL10A;FAU;MASP1;TLR7;RPL19;CASP1;RPL12;RPL41;ACE2;RPL35;C3;RPS12;RPL36AL;RPL18A;RPL7A;RPS7;RPS26;RPL10;RPS15;RPL21;RPS3A;TLR4;RPL32;RPL29;RPS10;RPL13A;RPS4X;C1QC;RPS13;RPS23;RPL3;RPS9;RPS14;FOS;RPL8;RPS16;RPS21;TLR3;RPS5;RPLP2;RPS15A;C7;RPL35A;UBA52;RPL36;RPS11;OAS1;RPL18;RPL9;RPS28;C3AR1;RPS2;RPL6;RPS27;RPLP1;RPL27;RPL23;RPL13;RPL28;MAS1;RPL24;RPL39;RPS17;RPL11;…	L3-5IT-3
779	GO_Biological_Process_2023__Mitochondrial ATP Synthesis Coupled Electron Transport (GO:0042775)	-0.557697	-3.49221	0	0	0	49/66	27.72%	COX8A;NDUFB10;COX6A1;COX5B;NDUFB8;NDUFA2;COX7C;COX4I1;NDUFA7;NDUFB2;NDUFC2;UQCRQ;NDUFA4;CYC1;UQCR10;COX6B1;UQCRFS1;UQCC3;UQCRB;NDUFB7;UQCR11;NDUFS5;NDUFA3;NDUFB3;NDUFA1;CYCS;COX7A2;NDUFS8;COX7B;NDUFA6;NDUFS3;UQCRH;NDUFS6;COX5A;NDUFS7;NDUFAB1;NDUFA12;COX6C;NDUFA8;NDUFS2;NDUFC1;UQCRC1;SDHAF2;NDUFV1;NDUFB5;NDUFB4;NDUFB9;NDUFV2;SDHA	L3-5IT-3
780	GO_Biological_Process_2023__Cellular Respiration (GO:0045333)	-0.522525	-3.44783	0	0	0	55/83	25.47%	COX8A;NDUFB11;NDUFB10;COX6A1;NR4A3;BLOC1S1;NDUFA13;COX5B;NDUFB8;NDUFA2;COX7C;COX4I1;NDUFA7;NDUFB2;NDUFC2;UQCRQ;NDUFA4;CYC1;UQCR10;ETFB;COX6B1;UQCRFS1;NDUFA11;UQCRB;NDUFB7;UQCR11;NDUFS5;NDUFA3;NDUFB3;NDUFA1;CYCS;COX7A2;NDUFS8;CHCHD5;SURF1;COX7B;NDUFA6;NDUFS3;UQCRH;NDUFS6;COX5A;MTLN;NDUFS7;NDUFAB1;MDH2;NDUFA12;COX6C;NDUFA8;NDUFS2;NDUFC1;UQCRC1;NDUFV1;NDUFB5;NDUFB4;NDUFB9	L3-5IT-3
781	GO_Molecular_Function_2023__Oxidoreduction-Driven Active Transmembrane Transporter Activity (GO:0015453)	-0.592373	-3.4269	0	0	0	41/52	26.70%	COX8A;NDUFB10;COX7A1;COX5B;NDUFB8;NDUFA2;COX7C;COX4I1;NDUFA7;NDUFB2;NDUFC2;CYBRD1;NDUFA4;UQCR10;COX6B1;UQCRB;NDUFB7;NDUFS5;NDUFA3;NDUFB3;NDUFA1;NDUFS8;COX7B;NDUFA6;NDUFS3;UQCRH;NDUFS6;COX5A;NDUFS7;NDUFA12;CYB561D2;NDUFA8;NDUFS2;NDUFC1;UQCRC1;NDUFV1;NDUFB5;NDUFB4;NDUFB9;CYB561A3;NDUFV2	L3-5IT-3
782	WikiPathway_2023_Human__Oxidative Phosphorylation WP623	-0.58141	-3.32015	0	0	0	39/51	26.70%	NDUFB10;ATP5MF;ATP5MC1;ATP5ME;ATP5F1D;NDUFB8;NDUFA2;NDUFA7;ATP5F1E;NDUFB2;NDUFC2;ATP5PO;NDUFA4;ATP5PD;ATP5MC3;NDUFA11;NDUFB7;ATP5PF;NDUFS5;ATP6AP1;NDUFA3;NDUFS8;NDUFA6;NDUFS3;NDUFS6;ATP6AP2;ATP5F1B;NDUFS7;NDUFAB1;NDUFA8;NDUFS2;NDUFC1;NDUFV1;NDUFB5;NDUFB4;NDUFB9;ATP5MG;ATP5F1A;NDUFV2	L3-5IT-3
783	GO_Biological_Process_2023__Oxidative Phosphorylation (GO:0006119)	-0.553726	-3.31646	0	0	0	45/60	29.59%	NDUFB11;NDUFB10;ATP5MF;NDUFA13;ATP5ME;ATP5F1D;NDUFB8;NDUFA2;NDUFA7;ATP5F1E;NDUFB2;NDUFC2;ATP5PO;ATP5PD;CHCHD10;NDUFA11;UQCRB;NDUFB7;ATP5PF;NDUFS5;NDUFA3;NDUFB3;NDUFA1;NDUFS8;NDUFA6;NDUFS3;UQCRH;NDUFS6;ATP5F1B;NDUFS7;NDUFAB1;NDUFA12;NDUFA8;NDUFS2;NDUFC1;UQCRC1;NDUFV1;NDUFB5;NDUFB4;NDUFB9;ATP5MG;NDUFV2;SDHA;SLC25A51;NDUFA9	L3-5IT-3
784	GO_Biological_Process_2023__Proton Motive Force-Driven Mitochondrial ATP Synthesis (GO:0042776)	-0.566816	-3.2713	0	0	0	39/52	27.72%	NDUFB11;NDUFB10;ATP5MF;NDUFA13;ATP5ME;ATP5F1D;NDUFB8;NDUFA2;NDUFA7;ATP5F1E;NDUFB2;NDUFC2;ATP5PO;ATP5PD;NDUFA11;NDUFB7;ATP5PF;NDUFS5;NDUFA3;NDUFB3;NDUFA1;NDUFS8;NDUFA6;NDUFS3;NDUFS6;ATP5F1B;NDUFS7;NDUFAB1;NDUFA12;NDUFA8;NDUFS2;NDUFC1;NDUFV1;NDUFB5;NDUFB4;NDUFB9;ATP5MG;NDUFV2;SDHA	L3-5IT-3
785	GO_Cellular_Component_2023__Polysomal Ribosome (GO:0042788)	-0.695495	-3.24368	0	0	0	21/27	20.23%	RPL10A;RPL19;RPL41;RPL36AL;RPL18A;RPL7A;RPS26;RPL32;RPS23;RPL8;RPS21;RPL36;RPL18;RPS28;RPL6;RPL24;RPL39;RPL11;RPL38;RPL30;RPL31	L3-5IT-3
786	GO_Biological_Process_2023__Proton Motive Force-Driven ATP Synthesis (GO:0015986)	-0.544837	-3.23925	0	0	0	43/59	27.72%	NDUFB11;NDUFB10;ATP5MF;ATP5MC1;NDUFA13;ATP5ME;ATP5F1D;NDUFB8;NDUFA2;NDUFA7;ATP5F1E;NDUFB2;NDUFC2;ATP5PO;ATP5PD;ATP5MC3;NDUFA11;ATP5MJ;NDUFB7;ATP5PF;NDUFS5;NDUFA3;NDUFB3;NDUFA1;NDUFS8;NDUFA6;ATP5MK;NDUFS3;NDUFS6;ATP5F1B;NDUFS7;NDUFAB1;NDUFA12;NDUFA8;NDUFS2;NDUFC1;NDUFV1;NDUFB5;NDUFB4;NDUFB9;ATP5MG;NDUFV2;SDHA	L3-5IT-3
787	MSigDB_Hallmark_2020__Oxidative Phosphorylation	-0.402657	-3.22104	0	0	0	141/198	41.93%	COX8A;GPX4;SLC25A5;ATP5MF;COX6A1;ATP5MC1;ECH1;ATP5ME;ATP5F1D;COX5B;NDUFB8;NDUFA2;ATP6V0C;COX7C;COX4I1;NDUFA7;ATP5F1E;NDUFB2;NDUFC2;UQCRQ;IDH3G;ATP5PO;TIMM10;NDUFA4;ATP5PD;ATP6V1F;CYC1;TOMM22;UQCR10;ETFB;TIMM8B;COX6B1;HSD17B10;UQCRFS1;MRPS12;ATP5MC3;ATP6V0B;LDHA;LDHB;BCKDHA;UQCRB;MRPL34;NDUFB7;ATP5PF;UQCR11;ATP6AP1;NDUFA3;HTRA2;NDUFB3;TIMM13;NDUFA1;CYCS;COX7A2;NDUFS8;SURF1;COX7B;BDH2;NDUFA6;ACAA2;…	L3-5IT-3
788	KEGG_2021_Human__Prion disease	-0.387025	-3.21914	0	0	0	136/239	30.20%	COX8A;C1QB;PPP3R2;NDUFB11;SLC25A5;PSMB6;TUBB2A;NOTCH1;NDUFB10;GRIN3A;COX6A1;ATP5MC1;COX7A1;HSPA8;NDUFA13;ATP5F1D;COX5B;NDUFB8;NDUFA2;TUBB1;COX7C;COX4I1;NDUFA7;ATP5F1E;NDUFB2;TUBA4A;NDUFC2;UQCRQ;C1QC;ATP5PO;NDUFA4;ATP5PD;CYC1;UQCR10;HSPA1L;PSMC3;COX6B1;DDIT3;UQCRFS1;EGR1;C7;ATP5MC3;GRIN2C;CREB3L3;PSMC5;NDUFA11;UQCRB;TUBA1A;NDUFB7;ATP5PF;UQCR11;TUBB4B;NDUFS5;PSMD8;TUBA1B;NDUFA3;CSNK2B;NDUFB3;HSPA5;…	L3-5IT-3
789	GO_Cellular_Component_2023__Mitochondrial Inner Membrane (GO:0005743)	-0.356129	-3.17606	0	0	0	235/350	42.39%	UCP1;COX8A;NDUFB11;NDUFAF3;SLC25A5;MRPL12;MRPL36;NDUFB10;ATP5MF;COX6A1;CYP24A1;ATP5MC1;ENDOG;MICOS13;TMEM160;NDUFA13;ATP5ME;TYMS;SCO2;ATP5F1D;COX5B;NDUFB8;NDUFA2;MRPL28;AURKAIP1;HCRT;COX7C;SDSL;COA3;COX4I1;NDUFA7;ATP5F1E;NDUFB2;NDUFC2;GADD45GIP1;PRODH;UQCRQ;MRPL40;ATP5PO;TIMM10;NDUFA4;ATP5PD;CYC1;UQCR10;MRPL55;COX6B1;UQCRFS1;MRPL54;MRPS12;ATP5MC3;MRPL51;MRPS34;LDHB;MRPS28;NDUFA11;UQCC3;ATP5MJ;UQC…	L3-5IT-3
790	GO_Molecular_Function_2023__Olfactory Receptor Activity (GO:0004984)	0.457501	3.13122	0	0	0	42/64	20.08%	OR2C1;OR13C3;OR2H2;OR1Q1;OR56A4;OR2T33;OR2T8;OR56B2P;OR2T12;OR1L8;OR14A2;OR56B1;OR52A5;OR2L8;OR10H5;OR10H1;OR52N4;OR1D2;OR52E5;OR2T11;OR8D4;OR10G4;OR13A1;OR2G6;OR3A2;OR2T6;OR52N2;OR1L6;OR7C1;OR52A1;OR51M1;OR2M3;OR2M2;OR10AC1;OR1B1;OR2M4;OR7D2;OR2L13;OR56A1;OR2L5;OR2L2;OR2L3	L3-5IT-3
791	WikiPathway_2023_Human__TYROBP Causal Network In Microglia WP3945	-0.521216	-3.04953	0	0	0	35/52	21.55%	LYL1;PYCARD;RGS1;APBB1IP;TNFRSF1B;MAF;ITGAX;ZFP36L2;TYROBP;STAT5A;CD84;C3;IL13RA1;CD37;GPX1;C1QC;LOXL3;IL18;ELF4;ITGAM;SAMSN1;PLEK;HLX;SPP1;HCLS1;CAPG;NCF2;BIN2;RBM47;NPC2;CD4;IL10RA;IGSF6;NRROS;PPP1R18	L3-5IT-3
792	GO_Cellular_Component_2023__Organelle Inner Membrane (GO:0019866)	-0.338547	-3.0428	0	0	0	212/374	35.32%	UCP1;COX8A;NDUFB11;NDUFAF3;SLC25A5;MRPL12;MRPL36;NDUFB10;ATP5MF;COX6A1;CYP24A1;ATP5MC1;ENDOG;MICOS13;TMEM160;NDUFA13;ATP5ME;TYMS;SCO2;ATP5F1D;COX5B;NDUFB8;NDUFA2;MRPL28;AURKAIP1;HCRT;COX7C;SDSL;COA3;COX4I1;NDUFA7;ATP5F1E;NDUFB2;NDUFC2;GADD45GIP1;PRODH;UQCRQ;MRPL40;ATP5PO;TIMM10;NDUFA4;ATP5PD;CYC1;UQCR10;MRPL55;COX6B1;UQCRFS1;MRPL54;MRPS12;TM7SF2;ATP5MC3;MRPL51;MRPS34;LDHB;MRPS28;NDUFA11;UQCC3;ATP…	L3-5IT-3
793	GO_Biological_Process_2023__Mitochondrial Respiratory Chain Complex Assembly (GO:0033108)	-0.457734	-3.03576	0	0	0	75/87	47.02%	NDUFB11;NDUFAF3;NDUFB10;NDUFA13;SCO2;NDUFB8;NDUFA2;COA3;COX14;NDUFB2;PET117;NDUFC2;UQCRFS1;NDUFA11;UQCC3;PET100;TMEM126A;NDUFB7;NDUFS5;CHCHD4;BCS1L;NDUFA3;NDUFB3;COX16;SDHAF1;NDUFA1;NDUFS8;SURF1;NDUFA6;NDUFS3;NDUFAF8;NDUFS7;NDUFAB1;NDUFA8;NDUFS2;NDUFC1;SDHAF2;UQCC2;NDUFB5;NDUFAF4;NDUFB4;TMEM186;NDUFB9;COA8;DMAC2;FOXRED1;NDUFA9;DMAC1;COX20;COX17;CHCHD7;TMEM223;SMIM20;TMEM126B;NDUFA5;OXA1L;NDUFB1;O…	L3-5IT-3
794	KEGG_2021_Human__Parkinson disease	-0.369032	-3.02812	0	0	0	112/220	26.70%	COX8A;RPS27A;NDUFB11;SLC25A5;PSMB6;TUBB2A;NDUFB10;COX6A1;ATP5MC1;COX7A1;NDUFA13;ATP5F1D;COX5B;NDUFB8;NDUFA2;TUBB1;COX7C;COX4I1;NDUFA7;ATP5F1E;NDUFB2;TUBA4A;NDUFC2;UBB;UQCRQ;ATP5PO;NDUFA4;ATP5PD;CYC1;UQCR10;PSMC3;COX6B1;DDIT3;UQCRFS1;ATP5MC3;UBA52;GPR37;PSMC5;NDUFA11;UQCRB;SLC18A2;TUBA1A;NDUFB7;ATP5PF;UQCR11;TUBB4B;NDUFS5;UBC;PSMD8;TUBA1B;NDUFA3;HTRA2;NDUFB3;SEPTIN5;CALM2;HSPA5;CALM3;TUBB4A;ITPR2;…	L3-5IT-3
795	GO_Biological_Process_2023__Sensory Perception Of Smell (GO:0007608)	0.479471	3.0236	0	0.000444771	0.001	32/49	20.08%	OR2C1;OR13C3;OR2H2;OR1Q1;OR2T33;OR2T8;OR2T12;SLC24A4;OR52A5;OR2L8;OR10H5;OR10H1;OR1D2;OR2T11;OR8D4;OR10G4;OR2G6;CNGB1;OR2T6;OR1L6;OR52A1;NXNL2;OR51M1;OR2M3;DRD2;OR2M2;OR10AC1;OR2M4;OR2L13;OR2L5;OR2L2;OR2L3	L3-5IT-3
796	GO_Biological_Process_2023__Detection Of Chemical Stimulus Involved In Sensory Perception Of Bitter Taste (GO:0001580)	0.624011	3.02017	0	0.000296514	0.001	18/23	16.90%	CA6;TAS2R1;GNAT2;TAS2R43;LPO;TAS2R10;TAS2R9;TAS2R30;TAS2R50;TAS2R3;TAS2R8;RTP5;TAS2R5;TAS2R7;TAS2R13;TAS2R46;TAS2R19;TAS2R4	L3-5IT-3
797	GO_Biological_Process_2023__Detection Of Chemical Stimulus Involved In Sensory Perception Of Smell (GO:0050911)	0.554872	3.01046	0	0.000222385	0.001	23/31	20.08%	OR2C1;OR13C3;OR2H2;OR2T33;OR2T8;OR2T12;SLC24A4;OR2L8;OR10H5;OR10H1;OR2T11;OR10G4;OR2G6;OR2T6;OR1L6;OR2M3;OR2M2;OR10AC1;OR2M4;OR2L13;OR2L5;OR2L2;OR2L3	L3-5IT-3
798	GO_Molecular_Function_2023__NADH Dehydrogenase (Quinone) Activity (GO:0050136)	-0.582989	-3.00838	0	0	0	27/34	29.59%	NDUFB10;NDUFB8;NDUFA2;NDUFA7;NDUFB2;NDUFC2;NDUFA4;NDUFB7;NDUFS5;NDUFA3;NDUFB3;NDUFS8;NDUFA6;NDUFS3;NDUFS6;NDUFS7;NDUFA12;NDUFA8;NDUFS2;NDUFC1;NDUFV1;NDUFB5;NDUFB4;NDUFB9;NDUFV2;NQO1;NDUFA9	L3-5IT-3
799	GO_Molecular_Function_2023__Taste Receptor Activity (GO:0008527)	0.658128	2.99087	0	0.000177908	0.001	15/19	16.90%	TAS2R1;TAS1R1;TAS2R43;TAS2R10;TAS2R9;TAS2R30;TAS2R50;TAS2R3;TAS2R8;TAS2R5;TAS2R7;TAS2R13;TAS2R46;TAS2R19;TAS2R4	L3-5IT-3
800	GO_Molecular_Function_2023__NADH Dehydrogenase (Ubiquinone) Activity (GO:0008137)	-0.582097	-2.96968	0	0	0	25/33	26.70%	NDUFB10;NDUFB8;NDUFA2;NDUFA7;NDUFB2;NDUFC2;NDUFA4;NDUFB7;NDUFS5;NDUFA3;NDUFB3;NDUFS8;NDUFA6;NDUFS3;NDUFS6;NDUFS7;NDUFA12;NDUFA8;NDUFS2;NDUFC1;NDUFV1;NDUFB5;NDUFB4;NDUFB9;NDUFV2	L3-5IT-3
801	GO_Biological_Process_2023__Detection Of Chemical Stimulus Involved In Sensory Perception Of Taste (GO:0050912)	0.600781	2.94976	0	0.000296514	0.002	19/25	16.90%	CA6;TAS2R1;GNAT2;TAS2R43;LPO;PKD1L3;TAS2R10;TAS2R9;TAS2R30;TAS2R50;TAS2R3;TAS2R8;RTP5;TAS2R5;TAS2R7;TAS2R13;TAS2R46;TAS2R19;TAS2R4	L3-5IT-3
802	GO_Cellular_Component_2023__Respiratory Chain Complex I (GO:0045271)	-0.553311	-2.94674	0	0	0	30/41	26.70%	NDUFB11;NDUFB10;NDUFA13;NDUFB8;NDUFA2;NDUFA7;NDUFB2;NDUFC2;NDUFA4;NDUFA11;NDUFB7;NDUFS5;NDUFA3;NDUFB3;NDUFA1;NDUFS8;NDUFA6;NDUFS3;NDUFS6;NDUFS7;NDUFAB1;NDUFA12;NDUFA8;NDUFS2;NDUFC1;NDUFV1;NDUFB5;NDUFB4;NDUFB9;NDUFV2	L3-5IT-3
803	GO_Cellular_Component_2023__Mitochondrial Respiratory Chain Complex I (GO:0005747)	-0.553311	-2.94674	0	0	0	30/41	26.70%	NDUFB11;NDUFB10;NDUFA13;NDUFB8;NDUFA2;NDUFA7;NDUFB2;NDUFC2;NDUFA4;NDUFA11;NDUFB7;NDUFS5;NDUFA3;NDUFB3;NDUFA1;NDUFS8;NDUFA6;NDUFS3;NDUFS6;NDUFS7;NDUFAB1;NDUFA12;NDUFA8;NDUFS2;NDUFC1;NDUFV1;NDUFB5;NDUFB4;NDUFB9;NDUFV2	L3-5IT-3
804	GO_Biological_Process_2023__Detection Of Chemical Stimulus Involved In Sensory Perception (GO:0050907)	0.532988	2.93227	0	0.000254155	0.002	23/32	20.08%	OR2C1;OR13C3;OR2H2;OR2T33;OR2T8;OR2T12;SLC24A4;OR2L8;OR10H5;OR10H1;OR2T11;OR10G4;OR2G6;OR2T6;OR1L6;OR2M3;OR2M2;OR10AC1;OR2M4;OR2L13;OR2L5;OR2L2;OR2L3	L3-5IT-3
805	MSigDB_Hallmark_2020__Myc Targets V1	-0.361952	-2.90545	0	0	0	144/197	45.87%	TYMS;NME1;NHP2;EEF1B2;RPS10;CYC1;RPS5;HSPE1;LDHA;PPIA;SET;NOP16;RPL18;LSM7;RAN;RPS2;RPL6;MRPL23;PSMD8;RRP9;PRDX4;C1QBP;HSP90AB1;H2AZ1;SNRPD2;TUFM;PCBP1;RPS6;MCM5;POLE3;MCM7;COX5A;RPLP0;RPL14;RPL34;RANBP1;PHB2;PSMA7;PCNA;SRM;NDUFAB1;AIMP2;LSM2;EIF4A1;MRPL9;RACK1;TRIM28;PSMB3;EIF4G2;CCT7;IMPDH2;PA2G4;VDAC1;VBP1;PSMD7;PSMA4;EIF1AX;PRDX3;NOLC1;ILF2;SRSF2;HNRNPA1;CCT5;SNRPA;POLD2;KPNA2;MCM4;RUVBL2;FBL…	L3-5IT-3
806	GO_Biological_Process_2023__Aerobic Respiration (GO:0009060)	-0.490474	-2.89819	0	0	0	39/58	29.59%	NDUFB11;NDUFB10;BLOC1S1;NDUFA13;ATP5F1D;NDUFB8;NDUFA2;NDUFA7;NDUFB2;NDUFC2;CHCHD10;NDUFA11;UQCRB;NDUFB7;NDUFS5;NDUFA3;NDUFB3;NDUFA1;NDUFS8;SURF1;NDUFA6;NDUFS3;UQCRH;NDUFS6;NDUFS7;NDUFAB1;MDH2;NDUFA12;NDUFA8;NDUFS2;NDUFC1;UQCRC1;NDUFV1;NDUFB5;NDUFB4;NDUFB9;NDUFV2;SLC25A51;NDUFA9	L3-5IT-3
807	GO_Biological_Process_2023__Sensory Perception Of Bitter Taste (GO:0050913)	0.592397	2.89641	0	0.000333578	0.003	18/24	16.90%	CA6;TAS2R1;GNAT2;TAS2R43;LPO;TAS2R10;TAS2R9;TAS2R30;TAS2R50;TAS2R3;TAS2R8;RTP5;TAS2R5;TAS2R7;TAS2R13;TAS2R46;TAS2R19;TAS2R4	L3-5IT-3
808	GO_Molecular_Function_2023__Bitter Taste Receptor Activity (GO:0033038)	0.688688	2.88782	0	0.000395352	0.004	13/16	16.90%	TAS2R43;TAS2R10;TAS2R9;TAS2R30;TAS2R50;TAS2R3;TAS2R8;TAS2R5;TAS2R7;TAS2R13;TAS2R46;TAS2R19;TAS2R4	L3-5IT-3
809	GO_Biological_Process_2023__Mitochondrial Electron Transport, NADH To Ubiquinone (GO:0006120)	-0.56563	-2.88389	0	0	0	25/34	26.70%	NDUFB10;NDUFB8;NDUFA2;NDUFA7;NDUFB2;NDUFC2;NDUFA4;NDUFB7;NDUFS5;NDUFA3;NDUFB3;NDUFS8;NDUFA6;NDUFS3;NDUFS6;NDUFS7;NDUFAB1;NDUFA8;NDUFS2;NDUFC1;NDUFV1;NDUFB5;NDUFB4;NDUFB9;NDUFV2	L3-5IT-3
810	GO_Biological_Process_2023__Energy Derivation By Oxidation Of Organic Compounds (GO:0015980)	-0.53528	-2.84828	0	0	0	25/39	22.35%	COX8A;COX6A1;NR4A3;COX5B;COX7C;COX4I1;UQCRQ;NDUFA4;CYC1;UQCR10;COX6B1;ADGRF5;UQCRB;UQCR11;MT3;CYCS;COX7A2;CHCHD5;LEP;COX7B;UQCRH;COX5A;MTLN;COX6C;UQCRC1	L3-5IT-3
811	KEGG_2021_Human__Diabetic cardiomyopathy	-0.362258	-2.81899	0	0	0	95/172	30.41%	COX8A;TGFBR2;NDUFB11;SLC25A5;NDUFB10;COX6A1;ATP5MC1;COX7A1;COL1A2;NDUFA13;ATP5F1D;COX5B;NDUFB8;NDUFA2;GAPDH;COX7C;COX4I1;NDUFA7;ATP5F1E;NDUFB2;NDUFC2;UQCRQ;ATP5PO;NDUFA4;ATP5PD;CYC1;UQCR10;COX6B1;UQCRFS1;ATP5MC3;PLCB2;NDUFA11;UQCRB;NDUFB7;ATP5PF;UQCR11;NDUFS5;NDUFA3;NDUFB3;PRKCD;CTSD;NDUFA1;ATP2A3;COX7A2;NDUFS8;CYBA;CYBB;COX7B;NDUFA6;PLN;NCF2;NDUFS3;UQCRH;NDUFS6;PIK3R3;SLC25A4;COX5A;PRKCA;REN;PPA…	L3-5IT-3
812	WikiPathway_2023_Human__Mitochondrial Complex I Assembly Model OXPHOS System WP4324	-0.489344	-2.81233	0	0	0	33/50	29.87%	NDUFB11;NDUFAF3;NDUFB10;NDUFA13;NDUFB8;NDUFA2;NDUFA7;NDUFB2;NDUFC2;NDUFB7;NDUFS5;NDUFA3;NDUFB3;NDUFA1;NDUFA6;NDUFS3;NDUFS6;NDUFAB1;NDUFA12;NDUFA8;NDUFS2;NDUFC1;TMEM70;NDUFV1;NDUFB5;NDUFAF4;NDUFB4;TMEM186;NDUFB9;NDUFV2;DMAC2;FOXRED1;DMAC1	L3-5IT-3
813	GO_Biological_Process_2023__Mitochondrial Respiratory Chain Complex I Assembly (GO:0032981)	-0.479288	-2.79125	0	0	0	43/53	42.35%	NDUFB11;NDUFAF3;NDUFB10;NDUFA13;NDUFB8;NDUFA2;NDUFB2;NDUFC2;NDUFA11;TMEM126A;NDUFB7;NDUFS5;BCS1L;NDUFA3;NDUFB3;NDUFA1;NDUFS8;NDUFA6;NDUFS3;NDUFAF8;NDUFS7;NDUFAB1;NDUFA8;NDUFS2;NDUFC1;NDUFB5;NDUFAF4;NDUFB4;TMEM186;NDUFB9;DMAC2;FOXRED1;NDUFA9;DMAC1;TMEM126B;NDUFA5;OXA1L;NDUFB1;ECSIT;LYRM2;NDUFB6;NDUFAF1;TAFAZZIN	L3-5IT-3
814	GO_Biological_Process_2023__NADH Dehydrogenase Complex Assembly (GO:0010257)	-0.479288	-2.79125	0	0	0	43/53	42.35%	NDUFB11;NDUFAF3;NDUFB10;NDUFA13;NDUFB8;NDUFA2;NDUFB2;NDUFC2;NDUFA11;TMEM126A;NDUFB7;NDUFS5;BCS1L;NDUFA3;NDUFB3;NDUFA1;NDUFS8;NDUFA6;NDUFS3;NDUFAF8;NDUFS7;NDUFAB1;NDUFA8;NDUFS2;NDUFC1;NDUFB5;NDUFAF4;NDUFB4;TMEM186;NDUFB9;DMAC2;FOXRED1;NDUFA9;DMAC1;TMEM126B;NDUFA5;OXA1L;NDUFB1;ECSIT;LYRM2;NDUFB6;NDUFAF1;TAFAZZIN	L3-5IT-3
815	GO_Biological_Process_2023__Gene Expression (GO:0010467)	-0.315682	-2.71812	0	2.48583e-05	0.001	147/280	35.16%	RPS27A;RPL26;CASP4;RPS18;MRPL12;RPL10A;MRPL36;FAU;RPL19;CASP1;RPL12;H3C1;RPL41;RPL35;EXOSC4;MRPL28;RPL36AL;RPL18A;RPL7A;RPS7;RPS26;RPL10;RPS15;RPL21;RPS3A;RPL32;RPL29;RPS10;CASP10;RPL13A;RPS4X;RPS13;MRPL55;RPS23;RPL3;RPS9;RPS14;RPL8;RPS16;RPS21;RPS5;MRPS12;NXT2;RPLP2;RPS15A;RPL35A;STUB1;MRPL51;ALYREF;RPL36;RPS11;RPL18;RPL9;MRPL34;RPS28;RPS2;RPL6;RPS27;MRPL23;RPLP1;RPL27;RPL13;MRPS17;RPL28;RPL24;R…	L3-5IT-3
816	GO_Molecular_Function_2023__Cytokine Activity (GO:0005125)	0.369891	2.7163	0	0.000978495	0.011	48/90	19.28%	CXCL8;INHBA;FAM3B;IL12A;CXCL16;WNT9A;INHBB;IL33;BMP6;WNT16;TNFSF11;KLF5;BMP4;CCL25;BMP5;IL11;MSTN;FAM3D;WNT2;GDF6;WNT11;WNT9B;GDF9;BMP8B;CCL22;WNT4;IFNE;GDF10;CCL2;AMH;IL5;CXCL13;GDF15;CSF1;BMP3;GDF5;GDF7;CCL5;WNT8A;INHA;BMP8A;TGFB2;IL16;TGFB1;GDF11;WNT3;WNT7A;WNT5B	L3-5IT-3
817	KEGG_2021_Human__Olfactory transduction	0.344822	2.65516	0	0.00121301	0.015	47/103	17.39%	OR2C1;OR13C3;OR2H2;OR1Q1;OR56A4;OR2T33;OR2T8;OR2T12;SLC24A4;OR1L8;OR14A2;OR11A1;OR56B1;OR52A5;OR2L8;OR10H5;OR10H1;OR4N2;OR52N4;OR1D2;OR52E5;PRKG2;OR2T11;OR8D4;OR10G4;CNGA3;OR13A1;OR2G6;CNGB1;OR3A2;OR2T6;OR52N2;OR4D9;OR1L6;OR7C1;OR52A1;OR51M1;OR2M3;CALML6;OR2M2;CALML4;OR10AC1;OR1B1;OR2M4;OR7D2;OR2L13;OR56A1	L3-5IT-3
818	GO_Molecular_Function_2023__Neuropeptide Hormone Activity (GO:0005184)	-0.652804	-2.6547	0	2.37535e-05	0.001	13/17	16.12%	CRH;PENK;NPY;GAL;GRP;CCK;CORT;HCRT;VIP;NPPA;PNOC;SPX;NMB	L3-5IT-3
819	GO_Molecular_Function_2023__Neuropeptide Activity (GO:0160041)	-0.652804	-2.6547	0	2.37535e-05	0.001	13/17	16.12%	CRH;PENK;NPY;GAL;GRP;CCK;CORT;HCRT;VIP;NPPA;PNOC;SPX;NMB	L3-5IT-3
820	GO_Biological_Process_2023__Ribosome Biogenesis (GO:0042254)	-0.344654	-2.63429	0	2.32371e-05	0.001	102/150	43.54%	RPL26;MRPL36;EXOSC4;RPS7;RPS15;RPS3A;RPS4X;RPS13;RPS23;RPS9;RPS14;RPS19BP1;RPS16;RPS5;MRPS12;RPS15A;RPL35A;RPS11;NOP16;RPS28;RPS27;RPL27;RRP9;RPS17;NOP53;RPL11;RPS19;RPL7;RPS6;RRS1;SNU13;RPS25;PIH1D1;NOC4L;EMG1;RPL14;EXOSC5;POP4;DDX54;RPS8;SBDS;RPL26L1;WDR74;BYSL;BOP1;GRWD1;RSL24D1;RPS24;UTP3;WDR18;NIP7;TBL3;RPL5;NOLC1;IGF2BP3;EBNA1BP2;WDR46;DKC1;FBL;ZNF622;RRP7A;MRTO4;PIH1D2;RBIS;NOL6;METTL17;RI…	L3-5IT-3
821	GO_Biological_Process_2023__Ribonucleoprotein Complex Biogenesis (GO:0022613)	-0.361925	-2.63003	0	2.27427e-05	0.001	81/116	43.27%	RPL26;MRPL36;RPS7;RPS15;RPS3A;RPS4X;RPS13;RPS23;RPS9;RPS14;RPS19BP1;RPS16;RPS5;MRPS12;RPS15A;RPL35A;RPS11;NOP16;RPS28;RPS27;RRP9;RPS17;RPL11;RPL38;RPS19;RPL7;RPS6;RRS1;SNU13;RPS25;EMG1;RPL14;RPS8;RPL26L1;WDR74;BYSL;BOP1;GRWD1;RSL24D1;RPS24;UTP3;NIP7;TBL3;RPL5;IGF2BP3;EBNA1BP2;WDR46;FBL;ZNF622;RRP7A;MRTO4;RBIS;NOL6;METTL17;RIOK1;NOL7;UTP11;NPM1;NOC2L;DNTTIP2;DHX37;RRP36;SURF6;PAK1IP1;GTF3A;PES1;NG…	L3-5IT-3
822	KEGG_2021_Human__Non-alcoholic fatty liver disease	-0.348856	-2.5941	0	4.45377e-05	0.002	70/138	27.72%	COX8A;NDUFB11;NDUFB10;COX6A1;COX7A1;NDUFA13;COX5B;NDUFB8;NDUFA2;COX7C;COX4I1;NDUFA7;NDUFB2;NDUFC2;UQCRQ;NDUFA4;CYC1;UQCR10;COX6B1;DDIT3;FOS;UQCRFS1;NDUFA11;UQCRB;NDUFB7;UQCR11;NDUFS5;NDUFA3;NDUFB3;NDUFA1;CYCS;ATF4;COX7A2;NDUFS8;LEP;COX7B;NDUFA6;TNFRSF1A;NDUFS3;UQCRH;NDUFS6;IL6R;JUN;PIK3R3;COX5A;CASP8;PPARA;NDUFS7;NDUFAB1;CASP7;NDUFA12;CEBPA;RAC1;COX6C;BAX;NDUFA8;NDUFS2;NDUFC1;UQCRC1;NDUFV1;GSK3A;…	L3-5IT-3
823	GO_Biological_Process_2023__Mitochondrial Gene Expression (GO:0140053)	-0.372762	-2.55883	0	4.36288e-05	0.002	69/103	41.31%	MRPL12;MRPL36;MRPL28;NDUFA7;GADD45GIP1;MRPL40;MRPL55;MRPL54;MRPS12;MRPL51;MRPS34;MRPS28;MRPL34;MRPL23;MRPL17;MRPS17;MRPL38;CHCHD1;MRPL57;MRPL21;MRPL2;MRPS26;MRPS7;TWNK;MRPL27;MRPL53;MRPL9;MRPS2;MRPL58;MRPL52;MTG1;MRPL16;MRPL41;MRPS33;MRPL43;MRPL24;MRPS15;MRPL11;MRPL20;MRPL14;MRPL10;MRPL4;TBRG4;MRPL18;MRPS6;MRPL47;MRPL35;FASTK;MRPL46;MRPL49;MRPS11;MRPL44;MRPS21;GATC;MRPS18A;MRPS10;MRPS18B;MRPS22;M…	L3-5IT-3
824	WikiPathway_2023_Human__Mitochondrial Complex IV Assembly WP4922	-0.528919	-2.55271	0	4.27562e-05	0.002	18/31	17.63%	COX8A;COX6A1;COX5B;COX7C;COA3;COX4I1;COX14;PET117;NDUFA4;COX6B1;TACO1;PET100;COX16;COX7A2;SURF1;COX7B;COX5A;HIGD1A	L3-5IT-3
825	GO_Biological_Process_2023__Ribosome Assembly (GO:0042255)	-0.463397	-2.5491	0	4.19179e-05	0.002	31/45	32.12%	RPL10;RPS15;RPS14;RPS5;RPS28;MPV17L2;RPL6;RPS27;C1QBP;NOP53;RPL11;RPL23A;RPS19;RRS1;MRPS7;NGRN;RPLP0;EIF6;SBDS;NOP2;MRPS2;RPSA;ERAL1;PPAN;MRPL20;RPL5;TRAF7;RRP7A;NLE1;MRPS11;NPM1	L3-5IT-3
826	KEGG_2021_Human__Cytokine-cytokine receptor interaction	0.294142	2.53306	0	0.00244624	0.032	77/160	20.51%	CXCL8;INHBA;IL12A;CXCL16;NGFR;IL3RA;INHBB;TNFRSF10A;TNFSF15;EDA2R;IL33;BMP6;IL18R1;CXCR4;IL11RA;CD40;TNFSF11;IL23R;BMP4;CCL25;TNFSF8;BMP5;CCR4;IL11;MSTN;GDF6;GDF9;PRLR;BMP8B;CCL22;OSMR;IFNE;GDF10;EBI3;TNFRSF10B;CCL2;AMH;IL5;IL17RC;IL2RB;CXCL13;IL17RB;GDF15;IL5RA;EDAR;TNFRSF14;CSF1;BMP3;GDF5;TNFSF18;GDF7;XCR1;THPO;EDA;CCL5;IL17B;RELT;TNFSF4;INHA;BMP8A;TGFB2;IL27RA;IFNLR1;IL16;TGFB1;GDF11;IL1R1;IL2…	L3-5IT-3
827	WikiPathway_2023_Human__Nonalcoholic Fatty Liver Disease WP4396	-0.33941	-2.52884	0	6.16676e-05	0.003	67/136	26.70%	COX8A;NDUFB11;NDUFB10;COX6A1;COX7A1;NDUFA13;COX5B;NDUFB8;NDUFA2;COX7C;COX4I1;NDUFA7;NDUFB2;NDUFC2;UQCRQ;NDUFA4;CYC1;UQCR10;COX6B1;DDIT3;UQCRFS1;NDUFA11;UQCRB;NDUFB7;UQCR11;NDUFS5;NDUFA3;NDUFB3;NDUFA1;CYCS;ATF4;COX7A2;NDUFS8;LEP;COX7B;NDUFA6;TNFRSF1A;NDUFS3;UQCRH;NDUFS6;IL6R;JUN;PIK3R3;COX5A;CASP8;PPARA;NDUFS7;NDUFAB1;CASP7;NDUFA12;CEBPA;RAC1;COX6C;BAX;NDUFA8;NDUFS2;NDUFC1;UQCRC1;NDUFV1;GSK3A;PIK3…	L3-5IT-3
828	GO_Biological_Process_2023__Positive Regulation Of Pathway-Restricted SMAD Protein Phosphorylation (GO:0010862)	0.414581	2.49404	0	0.00342131	0.046	23/42	17.83%	INHBA;INHBB;BMP6;BMP4;BMP5;MSTN;TTK;GDF6;GDF9;BMP8B;GDF10;GDF15;BMP3;GDF5;GDF7;INHA;TNXB;BMP8A;RBPMS;PPARG;TGFB2;TGFB1;GDF11	L3-5IT-3
829	GO_Biological_Process_2023__Mitochondrial Translation (GO:0032543)	-0.364218	-2.48123	0	0.000564705	0.026	66/98	42.89%	MRPL12;MRPL36;MRPL28;NDUFA7;GADD45GIP1;MRPL40;MRPL55;MRPL54;MRPS12;MRPL51;MRPS34;MRPS28;MRPL34;MRPL23;MRPL17;MRPS17;MRPL38;CHCHD1;MRPL57;TUFM;MRPL21;MRPL2;MRPS26;MRPS7;MRPL27;MRPL53;MRPL9;MRPS2;MRPL58;MRPL52;MTG1;MRPL16;MRPL41;MRPS33;MRPL43;MRPL24;MRPS15;MRPL11;MRPL20;MRPL14;MRPL10;MRPL4;MRPL18;MRPS6;MRPL47;MRPL35;MRPL46;MRPL49;MRPS11;MRPL44;MRPS21;GATC;MRPS18A;MRPS10;MRPS18B;MRPS22;MRPL50;MRPS23…	L3-5IT-3
830	GO_Biological_Process_2023__rRNA Metabolic Process (GO:0016072)	-0.366914	-2.47971	0	0.000574042	0.027	56/87	38.02%	RPL26;EXOSC4;RPS7;RPS15;RPS16;RPL35A;TRIR;RPS28;RPS27;RPL27;RRP9;RPS17;POLR1G;NOP53;RPL11;RPS19;RPL7;SLFN14;RPS6;RPS25;CAVIN1;PIH1D1;NOC4L;EMG1;RPL14;EXOSC5;POP4;DDX54;SBDS;WDR74;BYSL;RPS24;WDR18;RPL5;NOLC1;IGF2BP3;EBNA1BP2;DKC1;FBL;RRP7A;MRTO4;PIH1D2;NOL6;DEDD2;NIFK;SIRT7;EXOSC6;DDX49;DCAF13;WDR55;RRP36;LYAR;GTF3A;PES1;SPPL2B;NOP56	L3-5IT-3
831	GO_Molecular_Function_2023__Hormone Activity (GO:0005179)	-0.436616	-2.479	0	0.000563605	0.027	25/44	17.50%	SST;CRH;VGF;PENK;NPY;GAL;POMC;APLN;GRP;PTHLH;CCK;CORT;HCRT;VIP;ERFE;GHRL;CHGB;IGF1;NPPA;PNOC;LEP;SPX;NMB;INSL6;METRN	L3-5IT-3
832	GO_Cellular_Component_2023__Respiratory Chain Complex IV (GO:0045277)	-0.646206	-2.46286	0	0.000763504	0.037	12/15	21.34%	COX8A;COX6A1;COX5B;COX7C;COX4I1;NDUFA4;COX6B1;UQCRFS1;COX7A2;COX7B;COX5A;COX6C	L3-5IT-3
833	KEGG_2021_Human__Thermogenesis	-0.302666	-2.46023	0	0.000768862	0.038	101/208	30.96%	UCP1;COX8A;NDUFB11;NDUFAF3;NDUFB10;ATP5MF;COX6A1;ATP5MC1;COX7A1;NDUFA13;ATP5ME;ATP5F1D;COX5B;NDUFB8;NDUFA2;ADCY4;COX7C;COA3;COX4I1;COX14;NDUFA7;ATP5F1E;NDUFB2;NDUFC2;UQCRQ;ATP5PO;NDUFA4;ATP5PD;CYC1;UQCR10;PRDM16;COX6B1;UQCRFS1;ATP5MC3;DPF3;KLB;CREB3L3;NDUFA11;HRAS;UQCRB;NDUFB7;ATP5PF;UQCR11;NDUFS5;NPPA;NDUFA3;NDUFB3;COX16;CREB3L1;NDUFA1;ACTG1;COX7A2;NDUFS8;COX7B;NDUFA6;NDUFS3;UQCRH;RPS6;NDUFS6;CO…	L3-5IT-3
834	GO_Molecular_Function_2023__rRNA Binding (GO:0019843)	-0.439739	-2.45142	0	0.000829323	0.041	33/45	38.96%	RPL12;RPS13;RPS9;RPS14;RPS5;DDX28;TST;NOP53;RPL11;RBM34;RRS1;CAVIN1;MRPS7;NGRN;RPLP0;EMG1;SBDS;CIRBP;ERAL1;PPAN;MRPL16;MRPL11;RPL17;RPL5;MRPL18;MRPS6;RPS3;MRPS11;NPM1;MRPS18A;GTF3A;FASTKD5;MRPS18C	L3-5IT-3
835	GO_Biological_Process_2023__ncRNA Processing (GO:0034470)	-0.351128	-2.44747	0	0.000833384	0.042	70/98	46.19%	RPL26;EXOSC4;RPS7;POP7;RPS15;RPS16;RPL35A;RPS28;RPS27;RPL27;RRP9;RPS17;NOP53;RPL11;RPS19;RPL7;RPS6;RPS25;PIH1D1;INTS5;NOC4L;EMG1;RPL14;EXOSC5;POP4;DDX54;SBDS;WDR74;BYSL;TUT1;RPS24;WDR18;RPL5;NOLC1;IGF2BP3;EBNA1BP2;RPP21;DKC1;FBL;INTS12;TSEN34;RRP7A;MRTO4;PIH1D2;NOL6;THG1L;TSEN54;DDX49;DCAF13;WDR55;SSB;INTS11;KARS1;RRP36;LYAR;INTS1;PES1;SPPL2B;NOP56;EXOSC3;DDX27;EXOSC9;NOL8;UTP15;EXOSC2;ADAT1;PELP…	L3-5IT-3
836	GO_Biological_Process_2023__SMAD Protein Signal Transduction (GO:0060395)	0.401039	2.44496	0	0.00578202	0.082	23/44	18.95%	INHBA;ATOH8;SMAD6;INHBB;BMP6;BMP4;BMP5;MSTN;GDF6;GDF9;BMP8B;GDF10;SMAD3;GDF15;BMP3;GDF5;GDF7;INHA;BMP8A;TGFB2;TGFB1;GDF11;SMAD9	L3-5IT-3
837	GO_Biological_Process_2023__Ribosomal Large Subunit Biogenesis (GO:0042273)	-0.412139	-2.42867	0	0.0009442	0.049	39/51	42.87%	RPL26;RPL10;RPL35A;NOP16;RPL6;NOP53;RPL11;RPL23A;RPL7;RRS1;RPLP0;RPL14;EIF6;RPL26L1;WDR74;NOP2;RSL24D1;PPAN;NIP7;MRPL20;RPL5;EBNA1BP2;TRAF7;ZNF622;NLE1;MRTO4;NPM1;NOC2L;MAK16;NSA2;SURF6;PAK1IP1;BRIX1;GTF3A;PES1;TMA16;CINP;MALSU1;GTPBP4	L3-5IT-3
838	GO_Biological_Process_2023__Myoblast Fusion (GO:0007520)	-0.625756	-2.42342	0	0.000963767	0.051	12/16	25.28%	DOCK5;CACNA1H;DOCK2;ERVFRD-1;CD9;DOCK1;CD81;ERVW-1;ADAMTS5;ADAMTS15;NOS1;JAM2	L3-5IT-3
839	KEGG_2021_Human__Huntington disease	-0.286038	-2.42156	0	0.000965463	0.052	141/281	33.74%	UCP1;COX8A;NDUFB11;SLC25A5;PSMB6;TUBB2A;NDUFB10;COX6A1;ATP5MC1;COX7A1;POLR2I;NDUFA13;GPX3;ATP5F1D;COX5B;NDUFB8;NDUFA2;TUBB1;COX7C;COX4I1;NDUFA7;DCTN3;ATP5F1E;NDUFB2;TUBA4A;POLR2L;NDUFC2;GPX1;UQCRQ;ATP5PO;NDUFA4;ATP5PD;CYC1;POLR2J2;UQCR10;PSMC3;COX6B1;UQCRFS1;AP2M1;ATP5MC3;PLCB2;CREB3L3;PSMC5;NDUFA11;BDNF;POLR2K;UQCRB;TUBA1A;POLR2J;NDUFB7;ATP5PF;UQCR11;TUBB4B;NDUFS5;PSMD8;TUBA1B;NDUFA3;NDUFB3;CREB…	L3-5IT-3
840	GO_Biological_Process_2023__Positive Regulation Of Blood Coagulation (GO:0030194)	0.521918	2.4148	0	0.00776866	0.119	11/19	14.74%	SERPINE1;F2R;EMILIN2;HPSE;SERPINF2;F2;EMILIN1;PLG;VTN;THBS1;APOH	L3-5IT-3
841	GO_Biological_Process_2023__Neuropeptide Signaling Pathway (GO:0007218)	-0.42374	-2.4112	0	0.00108587	0.06	24/48	15.16%	PENK;HCRTR1;NPY;GALR1;NPBWR2;GAL;CYSLTR2;GRP;OPRK1;NXPH2;NXPH3;GPR37;CYSLTR1;GLRA2;GALR3;NPPA;PNOC;NTSR1;SSTR3;NMU;OPRL1;MCHR1;SSTR1;NTSR2	L3-5IT-3
842	WikiPathway_2023_Human__Mitochondrial Complex III Assembly WP4921	-0.633081	-2.40908	0	0.00113571	0.063	11/15	23.76%	UQCRQ;CYC1;UQCR10;UQCRFS1;UQCC3;UQCRB;UQCR11;BCS1L;UQCRH;UQCRC1;UQCC2	L3-5IT-3
843	GO_Cellular_Component_2023__Mitochondrial Proton-Transporting ATP Synthase Complex (GO:0005753)	-0.59618	-2.40126	0	0.00121467	0.069	12/17	18.74%	ATP5MF;ATP5MC1;ATP5ME;ATP5F1D;ATP5F1E;ATP5PO;ATP5PD;ATP5MC3;ATP5MJ;ATP5PF;ATP5MK;ATP5F1B	L3-5IT-3
844	GO_Cellular_Component_2023__Proton-Transporting ATP Synthase Complex (GO:0045259)	-0.59618	-2.40126	0	0.00121467	0.069	12/17	18.74%	ATP5MF;ATP5MC1;ATP5ME;ATP5F1D;ATP5F1E;ATP5PO;ATP5PD;ATP5MC3;ATP5MJ;ATP5PF;ATP5MK;ATP5F1B	L3-5IT-3
845	GO_Biological_Process_2023__Embryonic Digestive Tract Development (GO:0048566)	-0.632255	-2.39931	0	0.00119654	0.069	11/15	19.83%	FGFR2;SOX11;SALL1;STRA6;PDGFRA;RBPMS2;RARRES2;PCSK5;GLI3;GLI2;ID2	L3-5IT-3
846	GO_Biological_Process_2023__Regulation Of Blood Coagulation (GO:0030193)	0.471445	2.39478	0	0.00883981	0.141	14/25	14.74%	KNG1;SERPINE1;TFPI;F2R;EMILIN2;HPSE;CAV1;F2;EMILIN1;VTN;GP1BA;PLAUR;THBS1;APOH	L3-5IT-3
847	GO_Biological_Process_2023__Response To Ketone (GO:1901654)	0.577246	2.37196	0	0.0105175	0.175	11/15	21.70%	NKX3-1;HSD3B1;YAP1;CAV1;TGFBR3;SLIT2;THBS1;TGFB2;TGFB1;ABHD2;NR1H3	L3-5IT-3
848	GO_Biological_Process_2023__Dopamine Metabolic Process (GO:0042417)	0.535029	2.37151	0	0.00993321	0.175	11/17	19.28%	MOXD1;DRD4;DRD3;DBH;MAOA;DRD2;DRD1;LRTOMT;TGFB2;SNCAIP;MAOB	L3-5IT-3
849	GO_Biological_Process_2023__Ribosomal Small Subunit Biogenesis (GO:0042274)	-0.360426	-2.36019	0	0.00187059	0.108	56/81	43.27%	RPS7;RPS15;RPS3A;RPS4X;RPS13;RPS23;RPS9;RPS14;RPS19BP1;RPS16;RPS5;MRPS12;RPS15A;RPS11;TSR3;RPS28;RPS27;RRP9;RPS17;RPS19;RPS6;SNU13;RPS25;MRPS7;EMG1;RPS8;RPSA;ERAL1;RPS24;UTP3;TBL3;IGF2BP3;WDR46;FBL;RRP7A;NOL6;METTL17;RIOK1;NOL7;MRPS11;UTP11;NPM1;DNTTIP2;DHX37;RRP36;SURF6;NGDN;SPPL2B;NOP56;PNO1;FCF1;LTV1;MPHOSPH10;RIOK2;UTP15;DIMT1	L3-5IT-3
850	GO_Biological_Process_2023__Regulation Of Chemokine Production (GO:0032642)	-0.475992	-2.3353	0	0.00255608	0.142	17/30	16.20%	AIF1;PYCARD;TLR7;LILRB4;SIGIRR;TLR4;ELANE;IL18;TLR3;EGR1;CSF1R;LCP1;ALOX15B;CD74;IL6R;WNT5A;IL7	L3-5IT-3
851	GO_Biological_Process_2023__Fc Receptor Mediated Stimulatory Signaling Pathway (GO:0002431)	-0.531016	-2.30633	0	0.00332888	0.179	11/21	12.70%	SYK;NR4A3;PLPP4;YES1;MYO1G;FCER1G;VAV3;LYN;VAV2;VAV1;PRKCD	L3-5IT-3
852	KEGG_2021_Human__Amyotrophic lateral sclerosis	-0.265838	-2.29649	0	0.00367342	0.199	126/327	25.60%	COX8A;PPP3R2;NDUFB11;TNFRSF1B;PSMB6;TUBB2A;NDUFB10;COX6A1;ATP5MC1;COX7A1;CASP1;NDUFA13;GPX3;ATP5F1D;COX5B;NDUFB8;NDUFA2;TUBB1;COX7C;COX4I1;NDUFA7;DCTN3;ATP5F1E;NDUFB2;TUBA4A;NDUFC2;GPX1;UQCRQ;ATP5PO;NDUFA4;ATP5PD;CYC1;UQCR10;PFN1;PSMC3;NEFL;COX6B1;DDIT3;UQCRFS1;NXT2;ATP5MC3;CHCHD10;ALYREF;GRIN2C;PSMC5;NDUFA11;UQCRB;TUBA1A;NDUFB7;ATP5PF;UQCR11;TUBB4B;NDUFS5;PSMD8;TUBA1B;CAT;PFN2;NDUFA3;GABARAPL2;N…	L3-5IT-3
853	MSigDB_Hallmark_2020__TNF-alpha Signaling via NF-kB	-0.29089	-2.29589	0	0.0036224	0.199	83/175	24.85%	G0S2;DUSP4;CLCF1;TRIB1;TNC;SPHK1;TUBB2A;MSC;NR4A3;SDC4;STAT5A;PHLDA2;CD69;FOSB;HES1;EGR2;LITAF;GEM;TRIP10;TNFAIP8;IL23A;IL18;FOS;CCND1;EGR1;IL7R;IER3;EGR3;TNFAIP6;RELB;TNIP2;KLF2;PTX3;OLR1;NFKBIE;GADD45A;TNFRSF9;ACKR3;TNFSF9;EIF1;PLEK;BTG3;IER5;NINJ1;DUSP2;KLF10;VEGFA;FJX1;JUN;BCL3;MARCKS;SNN;MAFF;YRDC;SERPINB2;GADD45B;LDLR;CCN1;RHOB;JUNB;TIPARP;ICOSLG;CEBPD;BIRC3;BMP2;ID2;LAMB3;IL15RA;RCAN1;CEBP…	L3-5IT-3
854	WikiPathway_2023_Human__Pancreatic Cancer Subtypes WP5390	0.479363	2.28907	0	0.0197104	0.328	13/23	10.43%	LGALS4;PLA2G10;ANXA10;VSIG2;FAM83A;BTNL8;FAM3D;MYO1A;ST6GALNAC1;LYZ;TSPAN8;CDH17;LEMD1	L3-5IT-3
855	GO_Biological_Process_2023__rRNA Processing (GO:0006364)	-0.327105	-2.28771	0	0.00395349	0.218	65/99	43.54%	RPL26;EXOSC4;NHP2;RPS7;RPS15;RPS14;RPS16;RPL35A;TSR3;RPS28;RPS27;RPL27;RRP9;RPS17;NOP53;RPL11;RPS19;RPL7;RPS6;SNU13;RPS25;PIH1D1;NOC4L;EMG1;RPL14;EXOSC5;POP4;DDX54;EIF6;SBDS;WDR74;NOP2;RPS24;WDR18;RPL5;NOLC1;IGF2BP3;EBNA1BP2;DKC1;FBL;RRP7A;MRTO4;PIH1D2;NOL6;RIOK1;DDX49;DCAF13;WDR55;MAK16;NSA2;RRP36;LYAR;SART1;PES1;SPPL2B;NOP56;EXOSC3;DDX27;MPHOSPH10;EXOSC9;RIOK2;NOL8;TFB1M;UTP15;EXOSC2	L3-5IT-3
856	GO_Biological_Process_2023__Ribosomal Large Subunit Assembly (GO:0000027)	-0.565394	-2.28717	0	0.00392895	0.22	14/19	28.36%	RPL10;DDX28;RPL6;NOP53;RPL11;RPL23A;RRS1;RPLP0;NOP2;PPAN;MRPL20;RPL5;TRAF7;NLE1	L3-5IT-3
857	GO_Cellular_Component_2023__Small-Subunit Processome (GO:0032040)	-0.361836	-2.28338	0	0.00406184	0.232	48/70	43.58%	RPS27A;RPS7;RPS3A;RPS4X;RPS13;RPS23;RPS9;RPS14;RPS19BP1;RPS16;RPS5;MRPS12;RPS15A;RPS11;RPS28;RPS27;RRP9;RPS17;RPS19;RPS6;SNU13;NOC4L;EMG1;RPS8;FBLL1;RPS24;UTP3;TBL3;IGF2BP3;WDR46;FBL;RRP7A;NOL6;NOL7;DCAF13;UTP11;DNTTIP2;DHX37;NGDN;SPPL2B;NOP56;PNO1;PDCD11;FCF1;MPHOSPH10;UTP15;DIMT1;UTP14A	L3-5IT-3
858	GO_Molecular_Function_2023__Active Monoatomic Ion Transmembrane Transporter Activity (GO:0022853)	-0.547629	-2.27888	0	0.00414904	0.24	17/20	31.84%	COX8A;COX7A1;COX5B;COX7C;COX4I1;UQCR10;COX6B1;UQCRB;SLC18A2;COX7B;UQCRH;COX5A;UQCRC1;SLC47A1;SLC19A1;COX7A2L;CYB5A	L3-5IT-3
859	WikiPathway_2023_Human__Lipid Metabolism In Senescent Cells WP5149	0.53558	2.27283	0	0.02126	0.364	10/16	15.06%	PLA2G10;ALOX5;PLA2G4A;PLA2G4D;PLA2G12B;SLCO2A1;PLA2G7;CDKN1A;TP53;PTGS2	L3-5IT-3
860	KEGG_2021_Human__Alzheimer disease	-0.259669	-2.26161	0	0.00494195	0.276	129/334	24.42%	WNT6;COX8A;PPP3R2;PSENEN;NDUFB11;SLC25A5;PSMB6;TUBB2A;NDUFB10;COX6A1;ATP5MC1;COX7A1;NDUFA13;ATP5F1D;COX5B;NDUFB8;NDUFA2;GAPDH;TUBB1;COX7C;COX4I1;NDUFA7;ATP5F1E;NDUFB2;TUBA4A;NDUFC2;CDK5;UQCRQ;ATP5PO;NDUFA4;ATP5PD;CYC1;UQCR10;PSMC3;MME;DKK1;COX6B1;DDIT3;HSD17B10;UQCRFS1;WNT7B;ATP5MC3;PLCB2;GRIN2C;PSMC5;NDUFA11;HRAS;UQCRB;TUBA1A;NDUFB7;ATP5PF;UQCR11;TUBB4B;NDUFS5;PSMD8;WNT3A;TUBA1B;NDUFA3;CSNK2B;ND…	L3-5IT-3
861	MSigDB_Hallmark_2020__Epithelial Mesenchymal Transition	-0.282295	-2.2548	0	0.00516638	0.291	87/181	25.49%	LGALS1;TNFRSF12A;TNC;PTHLH;THY1;POSTN;SPARC;SDC1;VCAN;COL1A2;SCG2;SDC4;ANPEP;ITGB5;MXRA5;COL8A2;SFRP4;GEM;CXCL12;GREM1;COL5A1;SFRP1;RGS4;FBLN5;DKK1;PRRX1;SNTB1;FBN2;ADAM12;COL6A2;ITGA2;CCN2;IL32;HTRA1;MGP;DCN;IGFBP4;TIMP1;SERPINE2;ITGB3;BDNF;PTX3;FMOD;GADD45A;COL5A3;PFN2;PDLIM4;SPP1;THBS2;IL15;TNFRSF11B;CAPG;LAMA1;PMP22;VEGFA;ENO2;JUN;FGF2;MATN2;WNT5A;COL6A3;MCM7;ITGA5;DAB2;GADD45B;WIPF1;CCN1;RHO…	L3-5IT-3
862	WikiPathway_2023_Human__Complement And Coagulation Cascades WP558	0.377299	2.25333	0	0.0243141	0.418	20/45	11.25%	KNG1;SERPINE1;TFPI;C8G;SERPINC1;CFH;CR2;CR1;C6;C1QA;F2R;C5AR1;F3;SERPINF2;F5;F2;CFD;PLG;SERPIND1;PLAUR	L3-5IT-3
863	GO_Biological_Process_2023__Regulation Of Pathway-Restricted SMAD Protein Phosphorylation (GO:0060393)	0.350106	2.25169	0	0.0236133	0.424	25/53	17.83%	INHBA;SMAD6;INHBB;BMP6;BMP4;BMP5;MSTN;TTK;GDF6;GDF9;BMP8B;GDF10;EMILIN1;GDF15;BMP3;GDF5;GDF7;INHA;TNXB;BMP8A;RBPMS;PPARG;TGFB2;TGFB1;GDF11	L3-5IT-3
864	MSigDB_Hallmark_2020__Reactive Oxygen Species Pathway	-0.398741	-2.25092	0	0.00522275	0.295	34/47	39.98%	GPX4;LSP1;GPX3;PRDX2;CAT;CDKN2D;FES;PRDX4;SOD1;NDUFA6;LAMTOR5;FTL;PRDX1;JUNB;TXN;SELENOS;NDUFS2;MGST1;PRNP;NDUFB4;IPCEF1;ATOX1;NQO1;G6PD;SBNO2;ERCC2;PRDX6;GLRX;SOD2;GLRX2;STK25;MBP;PFKP;PTPA	L3-5IT-3
865	GO_Biological_Process_2023__Inflammatory Response (GO:0006954)	0.260408	2.22381	0	0.0281172	0.49	55/152	15.28%	CXCL8;KIT;PTGER4;TLR5;PTGIR;ELF3;ALOX15;CXCR4;TLR2;CD40;MEFV;SIGLEC1;CCL25;NOX4;PTGER3;BDKRB2;TLR6;SELE;F2R;C5AR1;PTGDR;AOC3;CCL22;C5AR2;CARD18;FPR2;CD44;CMKLR1;CCL2;ACKR1;ADCY8;AGER;LGALS9;TACR1;CXCL13;LYZ;NOX1;FPR1;NLRP3;GPR68;NOS2;FPR3;TAC4;F11R;XCR1;TLR1;SLC11A1;LTB4R;CCL5;THBS1;TNFSF4;CIITA;NOD1;RELA;AZU1	L3-5IT-3
866	GO_Biological_Process_2023__Positive Regulation Of Phospholipase C Activity (GO:0010863)	-0.45531	-2.21703	0	0.00729528	0.396	18/31	18.16%	ADRA1D;AVPR1B;CD86;LPAR1;EGFR;PDGFRA;FLT1;HTR2B;P2RY12;EDNRA;PLCB2;P2RY6;HRAS;GNA15;FGF2;ARHGAP6;PHB1;PHB2	L3-5IT-3
867	MSigDB_Hallmark_2020__Myc Targets V2	-0.37014	-2.20426	0	0.00807618	0.434	42/57	41.59%	DCTPP1;HSPE1;NOP16;HK2;RRP9;IPO4;DUSP2;MCM5;NOC4L;EXOSC5;SRM;IMP4;WDR74;AIMP2;BYSL;NOP2;GRWD1;PPAN;PA2G4;NIP7;NDUFAF4;NOLC1;TBRG4;TMEM97;FARSA;MCM4;CDK4;SLC19A1;MRTO4;PLK4;GNL3;NPM1;MYBBP1A;HSPD1;SLC29A2;PES1;RABEPK;SORD;NOP56;PPRC1;CBX3;MPHOSPH10	L3-5IT-3
868	GO_Biological_Process_2023__Negative Regulation Of MAPK Cascade (GO:0043409)	-0.326679	-2.2011	0	0.00816018	0.441	47/96	27.14%	DUSP4;DUSP10;DUSP6;PTPRC;IRAK3;LILRB4;SPRY4;GSTP1;SPRY1;DUSP9;TLR4;GBP1;FOXO1;EZR;HYAL2;STYXL2;PPIA;CBLC;PEBP1;LYN;PRKCD;CAV3;APOE;DUSP2;PSMD10;PHB1;BMP7;QARS1;RGS14;SPRED3;SPRED1;GPER1;BMP2;DUSP16;DUSP5;UCHL1;DUSP1;RGS2;PIK3R2;SPRED2;SPRY2;SMPD1;DUSP7;GBA1;DUSP8;PIN1;DUSP3	L3-5IT-3
869	KEGG_2021_Human__Pathways of neurodegeneration	-0.23948	-2.201	0	0.00807475	0.442	159/432	24.75%	WNT6;COX8A;PPP3R2;RPS27A;NDUFB11;TNFRSF1B;SLC25A5;PSMB6;TUBB2A;NDUFB10;COX6A1;ATP5MC1;COX7A1;NDUFA13;GPX3;ATP5F1D;COX5B;NDUFB8;NDUFA2;TUBB1;COX7C;COX4I1;NDUFA7;DCTN3;ATP5F1E;NDUFB2;TUBA4A;NDUFC2;GPX1;CDK5;UBB;UQCRQ;ATP5PO;NDUFA4;ATP5PD;CYC1;UQCR10;PSMC3;NEFL;DKK1;COX6B1;DDIT3;HSD17B10;UQCRFS1;WNT7B;ATP5MC3;PLCB2;UBA52;GPR37;GRIN2C;PSMC5;NDUFA11;HRAS;BDNF;UQCRB;TUBA1A;NDUFB7;ATP5PF;UQCR11;TUBB4B;N…	L3-5IT-3
870	KEGG_2021_Human__Taste transduction	0.323049	2.19263	0	0.0359152	0.583	34/66	25.34%	P2RX3;SCNN1B;HCN4;SCN9A;TAS2R1;HTR1A;TAS1R1;TAS2R43;PKD1L3;TAS2R10;ADCY8;TAS2R9;TAS2R30;TAS2R50;TAS2R3;TAS2R8;ITPR3;TAS2R5;TAS2R7;SCNN1A;TAS2R13;TAS2R46;GNB3;GRM4;TAS2R19;TAS2R4;HTR1F;PLCB4;GRM1;GABRA6;TAS2R20;HTR1E;PDE1B;CACNA1A	L3-5IT-3
871	GO_Biological_Process_2023__Fc-gamma Receptor Signaling Pathway (GO:0038094)	-0.499488	-2.18936	0	0.00895845	0.48	11/22	12.70%	SYK;PLPP4;YES1;MYO1G;FCER1G;VAV3;LCK;LYN;VAV2;VAV1;PRKCD	L3-5IT-3
872	GO_Cellular_Component_2023__Mitochondrial Ribosome (GO:0005761)	-0.503401	-2.18817	0.00170068	0.00896623	0.484	19/22	41.31%	MRPL28;NDUFA7;MRPL40;MRPS12;MRPL51;MRPL34;MRPL57;MRPL9;MTG1;MRPL43;MRPL20;MRPL14;MRPL18;MRPL35;MRPL49;MRPS22;MRPL37;MRPS14;MRPL13	L3-5IT-3
873	GO_Biological_Process_2023__Regulation Of Interleukin-1 Beta Production (GO:0032651)	-0.351842	-2.18324	0	0.00937157	0.499	31/67	18.20%	GSDMD;MNDA;PYCARD;CX3CR1;PYDC1;TYROBP;CARD16;CASP1;LILRB4;FFAR4;GSTP1;PYHIN1;TLR4;CD33;EGR1;GHRL;ELF4;LILRA2;IGF1;CLEC7A;FFAR1;NLRC4;LCP1;NLRP1;INAVA;FZD5;CPTP;NLRP2B;WNT5A;CASP8;CARD8	L3-5IT-3
874	GO_Biological_Process_2023__3'-UTR-mediated mRNA Destabilization (GO:0061158)	0.523387	2.18187	0.00468384	0.0373251	0.613	10/15	23.57%	PLEKHN1;ZFP36;ZC3H12A;DND1;ZC3H12D;MOV10;ZFP36L1;TRIM71;KHSRP;UPF1	L3-5IT-3
875	GO_Molecular_Function_2023__mRNA 5'-UTR Binding (GO:0048027)	-0.479407	-2.17997	0.00346021	0.00963244	0.512	17/24	34.89%	RPL26;RPL41;RPS7;RPS3A;RPS13;RPS14;IGF2BP1;IGF2BP2;SHMT2;NCL;RPL5;IGF2BP3;RSL1D1;GNL3;LARP6;MRPS11;SYNCRIP	L3-5IT-3
876	WikiPathway_2023_Human__GPCRs Class A Rhodopsin Like WP455	-0.28311	-2.17774	0	0.00972947	0.518	67/154	19.31%	ADRA1D;AVPR1B;HCRTR1;P2RY1;GALR1;CX3CR1;GPR6;NPBWR2;CYSLTR2;GPR171;LPAR5;OPRK1;GPR20;GPR17;NPFFR2;ADRA2C;TBXA2R;DRD5;CCR3;OPN1SW;GPR87;GPR18;ADRA2A;ACKR4;P2RY13;HTR2B;RHO;LPAR4;OR1A1;P2RY12;GPR34;EDNRA;ADORA2B;P2RY6;OR1F1;GPR37;GPR3;PTGFR;FFAR1;HTR2C;CYSLTR1;GALR3;GPR37L1;C3AR1;ACKR3;OR3A3;MAS1;NTSR1;OR7A17;GPR65;SSTR3;LPAR6;P2RY14;OPRL1;MCHR1;SSTR1;NTSR2;NPY2R;PTAFR;ADRA1B;ACKR2;CHRM5;GRPR;OR2AG…	L3-5IT-3
877	GO_Cellular_Component_2023__9+2 Motile Cilium (GO:0097729)	0.330469	2.1728	0	0.0385582	0.633	33/56	28.85%	TEKT5;TTLL8;TTC29;DNAH11;DNAI2;RSPH6A;DCDC2C;RSPH9;CFAP52;TACR1;DNAJB13;LYZL4;SAXO1;DNAH2;DNAH17;FLACC1;CFAP58;QRICH2;CFAP74;TEKT3;CABCOCO1;ODAD4;DNAH9;CFAP70;GAS8;TTLL3;CFAP221;WBP2NL;ATP2B4;RPGR;DNHD1;AK8;DNAH1	L3-5IT-3
878	GO_Biological_Process_2023__ATP Biosynthetic Process (GO:0006754)	-0.471522	-2.17235	0	0.0102687	0.536	16/24	27.94%	ATP5MF;ATP5MC1;ATP5ME;ATP5F1D;ATP5F1E;ATP5PO;ATP5PD;ATP5MC3;ATP5MJ;ATP5PF;ATP5MK;ATP5F1B;ATP5MG;ATP5F1A;ALDOA;NUDT2	L3-5IT-3
879	WikiPathway_2023_Human__Oligodendrocyte Specification And Differentiation Leading To Myelin Components For CNS WP4304	-0.486076	-2.16421	0	0.0110691	0.561	15/23	19.67%	OLIG2;MOG;NKX2-2;SHH;PLP1;OLIG1;IGF1;MAG;ASCL1;SOX10;CNP;SOX8;FGF2;GLI2;BMP2	L3-5IT-3
880	GO_Biological_Process_2023__Positive Regulation Of Glial Cell Differentiation (GO:0045687)	-0.540752	-2.16407	0.00178891	0.0109475	0.561	12/17	23.46%	CLCF1;TNFRSF1B;NOTCH1;HES1;EGR2;SERPINE2;MDK;PTN;BMP2;ID2;ZNF365;PTPRZ1	L3-5IT-3
881	GO_Biological_Process_2023__Regulation Of Oligodendrocyte Differentiation (GO:0048713)	-0.528332	-2.16288	0	0.010933	0.565	12/18	23.46%	TNFRSF1B;HES5;OPALIN;NOTCH1;SOX1;DAAM2;TMEM98;HES1;MDK;PTN;ZNF365;PTPRZ1	L3-5IT-3
882	GO_Biological_Process_2023__Extracellular Structure Organization (GO:0043062)	-0.324384	-2.14901	0	0.0123097	0.617	37/89	16.14%	COL4A5;COL13A1;NDNF;NPNT;POSTN;ADAMTS20;ADAMTS12;COL9A2;MMP23B;SPINT1;COL1A2;COL9A1;COL8A2;ADAMTS4;MMP19;COL5A1;MMP20;COL24A1;SMOC1;ADAMTS6;COL9A3;SPINK5;ADAMTS18;SMOC2;ADAMTS7;MMP15;COL22A1;ADAMTS1;COL5A3;ADAMTS5;HPSE2;VIT;ADAMTS15;COL14A1;CCDC80;MMP26;MATN2	L3-5IT-3
883	WikiPathway_2023_Human__Extrafollicular And Follicular B Cell Activation By SARS CoV 2 WP5218	-0.386886	-2.1459	0	0.012554	0.625	18/45	6.49%	IRF8;SYK;MAF;ITGAX;PTPRC;TLR7;HSPA8;ETS1;TMSB10;CD22;STAT5A;C3;CD69;MFGE8;CXCL12;TLR4;FOXO1;CD82	L3-5IT-3
884	GO_Biological_Process_2023__Peripheral Nervous System Development (GO:0007422)	-0.524998	-2.14301	0.00347826	0.0128494	0.634	9/18	14.66%	UGT8;GFRA3;EGR2;ADGRG6;ARTN;ERBB3;SOX10;SOX8;PMP22	L3-5IT-3
885	GO_Biological_Process_2023__Anterior/Posterior Pattern Specification (GO:0009952)	-0.451879	-2.14201	0	0.0128269	0.637	16/27	22.26%	HEY2;HES5;TBX1;HES1;HEYL;HEY1;DDIT3;HES4;PCSK5;HES2;GATA4;LRP5;ATP6AP2;BMP2;HES6;BHLHE41	L3-5IT-3
886	GO_Biological_Process_2023__Response To Reactive Oxygen Species (GO:0000302)	-0.350474	-2.13869	0	0.0130362	0.647	29/61	28.57%	CRYGD;UCP1;EGFR;ROMO1;PRDX5;HBB;GSTP1;PDGFRA;HBA1;GPX1;HYAL2;FOS;PLK3;MPV17L2;CAT;MT3;APOE;SOD1;JUN;STK26;PEX12;PEX10;HYAL1;PDK2;APOD;PRDX3;COA8;RPS3;MAPK3	L3-5IT-3
887	GO_Biological_Process_2023__Acetylcholine Receptor Signaling Pathway (GO:0095500)	-0.526194	-2.13737	0	0.0131214	0.655	12/17	31.51%	RGS10;RGS8;LYPD1;LY6H;CHRM5;CDK5R1;CHRM1;CHRNB2;CHRNA7;GRK2;CHRM2;CHRM4	L3-5IT-3
888	GO_Biological_Process_2023__Hydrogen Peroxide Catabolic Process (GO:0042744)	-0.557679	-2.13208	0.0017094	0.0136798	0.678	11/16	16.78%	HBQ1;PRDX5;HBB;GPX3;HBA1;GPX1;PRDX2;HBM;CAT;PRDX4;PRDX1	L3-5IT-3
889	GO_Biological_Process_2023__Ventricular Septum Development (GO:0003281)	-0.427044	-2.13183	0	0.0136072	0.678	13/31	12.55%	TGFBR2;SOX11;HEY2;SALL1;NOTCH1;PROX1;STRA6;HES1;SOX4;HEYL;HEY1;DAND5;GATA4	L3-5IT-3
890	WikiPathway_2023_Human__Vitamin D Receptor Pathway WP2877	0.256013	2.12576	0	0.053076	0.751	49/126	18.08%	TRPV5;KNG1;PTGER4;IL12A;TNFAIP3;HLA-DQA1;ALOX5;EPHB4;CYP3A4;BMP6;IRF4;CD40;TNFSF11;CDKN2A;BTLA;CDK2;MYC;FGF23;GXYLT2;SULT2A1;CDKN2B;BCL6;SOSTDC1;CYP2D6;PRDM1;CDKN1A;DND1;IGFBP5;MX2;SALL4;CRACR2A;LGALS9;NOX1;CYP3A5;VDR;IGFBP3;CYP2S1;SERPINB1;SLC37A2;TNFSF4;COLEC11;CCNE1;ID1;ABCD1;TGFB2;CEACAM1;CBS;TGFB1;TIMP3	L3-5IT-3
891	GO_Biological_Process_2023__External Encapsulating Structure Organization (GO:0045229)	-0.321467	-2.12298	0	0.0144673	0.703	37/89	16.14%	COL4A5;COL13A1;NDNF;NPNT;POSTN;ADAMTS20;ADAMTS12;COL9A2;MMP23B;SPINT1;COL1A2;COL9A1;COL8A2;ADAMTS4;MMP19;COL5A1;MMP20;COL24A1;SMOC1;ADAMTS6;COL9A3;SPINK5;ADAMTS18;SMOC2;ADAMTS7;MMP15;COL22A1;ADAMTS1;COL5A3;ADAMTS5;HPSE2;VIT;ADAMTS15;COL14A1;CCDC80;MMP26;MATN2	L3-5IT-3
892	KEGG_2021_Human__Neuroactive ligand-receptor interaction	-0.251492	-2.12236	0	0.0145036	0.708	95/244	20.40%	SST;CRH;PENK;ADRA1D;AVPR1B;HCRTR1;TAC1;CALCR;NPY;P2RY1;GALR1;S1PR5;NPBWR2;GAL;POMC;APLN;LPAR1;CYSLTR2;GRP;GRIN3A;CHRNB3;CCK;NPB;CORT;OPRK1;C3;NPFFR2;S1PR2;VIPR2;P2RX1;TSPO;HCRT;ADRA2C;TBXA2R;DRD5;VIP;ADRA2A;GABRP;P2RY13;HTR2B;LPAR4;TACR3;GIPR;EDNRA;GHRL;ADORA2B;CHRNB1;P2RY6;ADCYAP1;GRIN2C;LPAR3;PTGFR;INSL3;HTR2C;PRSS3;CYSLTR1;GLRA2;GALR3;C3AR1;GIP;MAS1;CHRNA1;NPW;GABRR1;NTSR1;SSTR3;LPAR6;TACR2;LE…	L3-5IT-3
893	GO_Cellular_Component_2023__Proton-Transporting V-type ATPase Complex (GO:0033176)	-0.528011	-2.11959	0	0.0147467	0.718	12/17	27.46%	ATP6V0C;ATP6V1F;ATP6V0B;ATP6V0D2;ATP6V1G2;CCDC115;TMEM199;RNASEK;ATP6AP2;ATP6V1G1;ATP6V1D;ATP6V0D1	L3-5IT-3
894	KEGG_2021_Human__Autoimmune thyroid disease	0.427557	2.10822	0.00252525	0.0585826	0.794	13/24	12.53%	HLA-DOB;HLA-DQA1;HLA-DRB5;CD40;HLA-DMB;CD80;TG;HLA-DQB1;IL5;TPO;HLA-E;HLA-DMA;HLA-F	L3-5IT-3
895	MSigDB_Hallmark_2020__Inflammatory Response	-0.275373	-2.10535	0	0.0169278	0.76	67/162	20.08%	HAS2;CSF3R;MET;RGS1;TNFRSF1B;LPAR1;RGS16;SPHK1;TPBG;TNFSF10;PIK3R5;LCP2;OPRK1;NPFFR2;CD69;EREG;STAB1;VIP;CD70;LY6E;BST2;AXL;IL18;CD82;RHOG;TACR3;TLR3;KCNMB2;IL7R;ADORA2B;TNFAIP6;CD14;TIMP1;ITGB3;OLR1;LCK;C3AR1;LYN;TNFRSF9;SCN1B;TNFSF9;GNA15;BEST1;SLC4A4;IL15;FZD5;KCNJ2;IL4R;CYBB;SLC31A2;GPC3;CD55;SCARF1;ITGA5;ADRM1;PTAFR;KCNA3;LDLR;ICOSLG;NDP;CHST2;IL10RA;HPN;AQP9;SELENOS;IL15RA;SLC28A2	L3-5IT-3
896	GO_Biological_Process_2023__Cell-Cell Junction Organization (GO:0045216)	0.312763	2.10141	0	0.059906	0.815	27/60	21.55%	CLDN1;PCDHGB4;DSP;KIRREL1;PKHD1;F2R;PRTN3;DSG2;PKP2;SMAD3;MARVELD2;CDH6;CDH5;CDH17;TJP2;TJP3;CDH22;CDH26;FLCN;TGFB2;CDH3;TGFB1;TRPV4;OCLN;GJC1;CDHR3;CDH7	L3-5IT-3
897	WikiPathway_2023_Human__Nuclear Receptors In Lipid Metabolism And Toxicity WP299	0.404591	2.09635	0	0.0601033	0.829	15/25	23.40%	CYP3A4;NR1H4;ABCB4;ABCA1;ABCC2;ABCC3;NR1I2;VDR;CYP4A11;NR1I3;PPARG;ABCG5;RARG;NR1H3;ABCG1	L3-5IT-3
898	GO_Molecular_Function_2023__Receptor Ligand Activity (GO:0048018)	0.232053	2.09474	0	0.059054	0.831	82/203	19.62%	INHBA;FAM3B;KNG1;DEFB109B;HGF;IL12A;WNT9A;INHBB;VEGFC;IL33;APELA;BMP6;DPP4;SEMA3F;LGALS3;SEMA3A;WNT16;TNFSF11;TGFA;CD80;BMP4;CCL25;FGF23;SEMA6A;BMP5;DLL4;IL11;MSTN;JAG1;FAM3D;WNT2;C1QTNF12;METRNL;GDF6;WNT11;WNT9B;GDF9;BMP8B;F2;WNT4;IFNE;GDF10;FGF10;AMH;EPGN;IL5;FGF17;CXCL13;GDF15;FGF18;OSGIN1;EGF;EDN3;CSF1;BMP3;GDF5;GDF7;SEMA5B;FGF5;THPO;EDA;CCL5;WNT8A;SEMA4A;APOA1;INHA;PDGFB;BMP8A;GNRH1;NPPC;TGF…	L3-5IT-3
899	KEGG_2021_Human__Alcoholism	-0.290196	-2.09407	0	0.0186193	0.787	57/124	29.01%	CRH;NPY;GNG3;H2BC12;GRIN3A;GNG12;H2BC21;H3C1;GNGT2;FOSB;H2BC8;GNG10;GNG13;SHC4;H4C5;ADORA2B;H4C3;GRIN2C;CREB3L3;HRAS;H2AC15;BDNF;H2AC8;SLC18A2;H2BC4;H2AC20;CALM2;CALM3;CREB3L1;H2AZ1;CALM1;ATF4;H4C4;H2AC6;HDAC1;GNG4;H2AJ;H2AX;GNG11;CREB5;GRIN2D;CREB3;H3-3B;PPP1R1B;GNAS;ARAF;GNB4;H2BC15;HDAC10;GNG5;H2BC5;GNB2;HDAC9;SHC1;CREB3L2;MAPK3;ATF6B	L3-5IT-3
900	GO_Biological_Process_2023__Positive Regulation Of Chemokine Production (GO:0032722)	-0.40556	-2.09237	0.00163399	0.0188067	0.794	19/38	16.20%	AIF1;PYCARD;SYK;TLR7;CD84;TLR4;IL18;TLR3;EGR1;ADCYAP1;CLEC7A;OAS1;CSF1R;LCP1;ALOX15B;CD74;IL6R;WNT5A;IL7	L3-5IT-3
901	GO_Biological_Process_2023__Negative Regulation Of Lymphocyte Proliferation (GO:0050672)	-0.443343	-2.08967	0.00168067	0.0191804	0.801	15/27	20.66%	MNDA;CD86;SOX11;VSIG4;TYROBP;SDC4;LILRB4;LILRB1;PLA2G5;HLA-DRB1;GPNMB;LYN;VTCN1;PDCD1LG2;CEBPB	L3-5IT-3
902	GO_Biological_Process_2023__Positive Regulation Of Production Of Molecular Mediator Of Immune Response (GO:0002702)	-0.445099	-2.08743	0.00328947	0.0193591	0.804	17/26	28.00%	CLCF1;CD86;PTPRC;LAPTM5;SASH3;TNFRSF4;INAVA;LACC1;IRF5;DNAJB9;WNT5A;PHB1;PHB2;STX4;SPHK2;XBP1;SCIMP	L3-5IT-3
903	KEGG_2021_Human__Systemic lupus erythematosus	-0.342299	-2.08394	0.0015949	0.0197797	0.814	27/63	15.78%	CD86;C1QB;HLA-DPA1;H2BC12;H2BC21;H3C1;TRIM21;C3;H2BC8;C1QC;ELANE;H4C5;HLA-DOA;C7;H4C3;HLA-DRB1;H2AC15;H2AC8;H2BC4;H2AC20;HLA-DPB1;HLA-DRA;H2AZ1;H4C4;H2AC6;H2AJ;H2AX	L3-5IT-3
904	GO_Biological_Process_2023__Embryonic Organ Morphogenesis (GO:0048562)	-0.459631	-2.08053	0	0.0201149	0.82	13/24	19.83%	FGFR2;TBX20;SOX11;MESP1;TBX1;HES1;PDGFRA;RBPMS2;FBN2;PPP1R35;ALDH1A3;FUZ;ID2	L3-5IT-3
905	GO_Biological_Process_2023__Negative Regulation Of MAP Kinase Activity (GO:0043407)	-0.373329	-2.06833	0.00160514	0.0224663	0.857	24/46	26.25%	DUSP10;IRAK3;SPRY4;GSTP1;SPRY1;HYAL2;CBLC;NPPA;LYN;PRKCD;CAV3;APOE;DNAJA1;BMP7;RGS14;BMP2;DUSP16;UCHL1;DUSP1;RGS2;SPRY2;SMPD1;DUSP7;GBA1	L3-5IT-3
906	GO_Biological_Process_2023__Positive Regulation Of Catabolic Process (GO:0009896)	-0.318524	-2.06761	0.00149925	0.0223516	0.858	27/75	18.02%	ANGPTL3;LAPTM5;ASB5;NDUFA13;PYHIN1;VSIR;C4BPA;VIP;FOXO1;C4BPB;EZR;BARD1;RILP;TNFSF12;OAZ1;VPS28;MAGEF1;ASB9;CAV3;OAZ3;NKD1;MSN;HSP90AA1;GPC3;WNT5A;DACT1;TIPARP	L3-5IT-3
907	GO_Biological_Process_2023__Positive Regulation Of Cation Channel Activity (GO:2001259)	-0.409305	-2.06732	0	0.02222	0.858	21/35	32.38%	LRRC26;PPP3R2;STAC;GAL;TMSB4X;EDNRA;ANTKMT;P2RY6;CASQ1;JPH2;CALM2;CALM3;CALM1;PPP3R1;AKAP5;EDN1;STAC3;GSTO1;APEX1;LRRC55;KCNIP2	L3-5IT-3
908	GO_Biological_Process_2023__Glial Cell Differentiation (GO:0010001)	-0.416011	-2.0669	0	0.0221001	0.859	17/31	23.46%	HES5;VCAN;RELN;EGR2;CDK5;ADGRG6;SHH;ERBB3;SOX2;MYRF;HAPLN1;SOX10;SOX8;METRN;BCAN;PAX2;PTPRZ1	L3-5IT-3
909	GO_Cellular_Component_2023__Mitochondrial Intermembrane Space (GO:0005758)	-0.344743	-2.06007	0	0.0231627	0.875	26/58	23.76%	PRELID1;BLOC1S1;TRIAP1;HCRT;CHCHD2;TIMM10;TIMM8B;ALPL;CHCHD10;NDUFB7;CHCHD4;ARL2;STOML2;HTRA2;TIMM13;CYCS;CHCHD5;SOD1;COA7;TIMM8A;PINK1;COA4;HAX1;NDUFA8;NME4;UQCC2	L3-5IT-3
910	GO_Biological_Process_2023__Chaperone-Mediated Protein Complex Assembly (GO:0051131)	-0.488916	-2.05993	0	0.0230183	0.875	18/21	42.25%	PFDN6;PTGES3L;PSMG3;HSP90AB1;HSPA1A;HSP90AA1;THEG;HOPX;CLU;TMEM35A;BBS12;HSPD1;CCT2;BBS10;PTGES3;LONP1;MKKS;NDUFAF1	L3-5IT-3
911	GO_Biological_Process_2023__Regulation Of Ubiquitin Protein Ligase Activity (GO:1904666)	-0.526192	-2.05605	0	0.0235525	0.882	12/15	36.38%	RPS7;UBE2S;RPL11;USP44;RPL17;RPL5;FBXO5;MAD2L1;FZR1;CDC14B;MAD2L2;SKP1	L3-5IT-3
912	WikiPathway_2023_Human__Microglia Pathogen Phagocytosis Pathway WP3937	-0.407535	-2.05557	0.0016129	0.0233982	0.882	17/34	17.73%	PIK3CG;C1QB;SYK;TYROBP;C1QC;ITGAM;FCER1G;VAV3;LYN;RAC3;VAV2;VAV1;CYBA;CYBB;NCF2;PIK3R3;PIK3R6	L3-5IT-3
913	GO_Biological_Process_2023__Regulation Of Neurogenesis (GO:0050767)	-0.339221	-2.05426	0.00160772	0.0234171	0.886	25/57	22.26%	CX3CR1;SOX11;HEY2;HES5;NOTCH1;HES1;LEF1;HEYL;HEY1;MME;S100A10;PAX6;LRP2;WNT3A;HES2;ASCL1;PER2;GPRASP3;RGS14;REST;GPER1;SERPINF1;HES6;HMGB2;BHLHE41	L3-5IT-3
914	GO_Biological_Process_2023__Positive Regulation Of Immune System Process (GO:0002684)	0.461674	2.05299	0	0.0774179	0.901	11/18	18.97%	C8G;C6;NCKAP1L;GPR151;CFP;LGALS9;TNFSF18;TGFB2;PIK3CD;MADCAM1;ZP3	L3-5IT-3
915	GO_Biological_Process_2023__Sensory Perception Of Chemical Stimulus (GO:0007606)	0.416688	2.0508	0.00484262	0.076204	0.904	13/25	14.89%	OR1Q1;SLC24A4;OR52A5;OR1D2;OR8D4;C5AR1;OR3A2;OR52A1;NXNL2;OR51M1;ITPR3;DRD2;OR2M4	L3-5IT-3
916	WikiPathway_2023_Human__Selenium Micronutrient Network WP15	-0.333019	-2.04875	0	0.0244245	0.895	30/67	19.47%	GPX4;SOD3;PRDX5;HBB;SELENOW;GPX3;ALOX5AP;HBA1;GPX1;F7;SELENOM;PRDX2;MSRB1;CAT;ALB;PRDX4;ALOX15B;SOD1;PLAT;PTGS1;PRDX1;SELENOP;LDLR;RFK;APOB;PNPO;TXN;KMO;SEPHS2;SELENOS	L3-5IT-3
917	GO_Biological_Process_2023__Motile Cilium Assembly (GO:0044458)	0.502329	2.04841	0	0.075297	0.907	11/15	26.02%	ZMYND10;RSPH6A;RSPH9;CCDC39;DNAAF1;ENKD1;E2F4;BBS5;CCDC40;SPATA6;CFAP221	L3-5IT-3
918	WikiPathway_2023_Human__Overview Of Nanoparticle Effects WP3287	0.500978	2.04695	0.00928074	0.0739844	0.908	9/16	16.13%	CXCL8;HMOX1;ITGAD;LAMA3;COL4A1;CCND3;PTGS2;PIK3CD;CDH3	L3-5IT-3
919	KEGG_2021_Human__Complement and coagulation cascades	0.309136	2.04544	0	0.0725964	0.909	24/62	11.25%	KNG1;F2RL2;SERPINE1;TFPI;F11;C8G;SERPINC1;CFH;CR2;CR1;C6;BDKRB2;C1QA;F2R;C5AR1;F3;SERPINF2;F5;F2;CFD;PLG;SERPIND1;VTN;PLAUR	L3-5IT-3
920	GO_Biological_Process_2023__Positive Regulation Of Intracellular Signal Transduction (GO:1902533)	-0.21863	-2.0445	0	0.025212	0.901	191/466	28.22%	ADRA1D;AVPR1B;CD86;CALCR;FGFR2;PIK3CG;PYCARD;LGALS1;CX3CR1;SOX11;GPR62;POMC;MUSK;LPAR1;SPHK1;EGFR;TNFSF10;PTPRC;LAPTM5;PIK3R5;IGFBP6;TBX1;CARD16;TLR7;CASP1;TRIM21;TRIP6;FFAR4;RELN;TRIM38;GAPDH;SEMA3E;ADRA2C;PDGFRA;LITAF;RPS15;TLR4;F7;LTB;CASP10;BST2;UNC5B;FLT1;IL23A;ADRA2A;TRIM56;AXL;S100B;C1QTNF4;SEMA5A;IL18;TCIM;HTR2B;DDIT3;TLR3;P2RY12;RRAGA;PDGFD;RFPL1;FGF1;GHRL;NODAL;HLA-DRB1;PPIA;DCN;GPR37;W…	L3-5IT-3
921	GO_Biological_Process_2023__BMP Signaling Pathway (GO:0030509)	0.317779	2.04329	0.00255754	0.0717643	0.912	21/50	18.95%	INHBA;SMAD6;INHBB;BMP6;TMEM100;BMP4;GDF6;GDF9;TGFBR3;GDF10;USP9Y;SCX;FAM83G;BMP3;GDF5;HJV;GDF7;PPARG;TGFB2;TGFB1;SMAD9	L3-5IT-3
922	GO_Biological_Process_2023__Myotube Differentiation (GO:0014902)	-0.471692	-2.03422	0	0.0274937	0.926	12/21	26.24%	DOCK5;CACNA1H;DOCK2;ERVFRD-1;DOCK1;IGF1;ERVW-1;ADAMTS5;ADAMTS15;NOS1;JAM2;TMEM182	L3-5IT-3
923	GO_Cellular_Component_2023__Spliceosomal snRNP Complex (GO:0097525)	-0.337881	-2.03317	0.00149925	0.0275395	0.929	40/56	46.13%	SF3B5;LSM7;TSSC4;SNRPD2;SNU13;LSM4;CD2BP2;LSM2;HTATSF1;SNRPB;SNRPE;LSM3;SF3B6;SF3B4;SNRPA;SNRPB2;SNRPN;SF3A2;SF3B2;PRPF31;PHF5A;DDX23;SNRPD3;RBMX2;TXNL4B;SNRPG;SF3A1;PRPF8;BUD13;SNRPD1;SNRPA1;PRPF4;TXNL4A;SNIP1;LUC7L2;PPIH;PRPF6;SNRNP200;SNRNP70;LSM5	L3-5IT-3
924	KEGG_2021_Human__Retrograde endocannabinoid signaling	-0.26976	-2.03239	0	0.0274985	0.932	60/138	29.59%	GNG3;NDUFB11;NDUFB10;GNG12;GNGT2;NDUFA13;NDUFB8;NDUFA2;ADCY4;NDUFA7;NDUFB2;SLC17A6;NDUFC2;GNG10;NDUFA4;GNG13;GABRP;SLC32A1;PLCB2;NDUFA11;NDUFB7;NDUFS5;NDUFA3;NDUFB3;GABRR1;ITPR2;NDUFA1;NDUFS8;NDUFA6;NDUFS3;GNG4;NDUFS6;GABRD;GNG11;CACNA1F;SLC17A8;PRKCA;NDUFS7;NDUFAB1;GABRG1;NDUFA12;ADCY7;NDUFA8;NDUFS2;NDUFC1;NDUFV1;SLC17A7;NDUFB5;NDUFB4;GNB4;GNG5;NDUFB9;GNB2;NDUFV2;MAPK12;MAPK3;GABRA5;MAPK11;PLCB3…	L3-5IT-3
925	MSigDB_Hallmark_2020__Allograft Rejection	0.23204	2.03073	0	0.0763367	0.927	55/152	17.95%	INHBA;IL12A;NCR1;HLA-DOB;CARTPT;HLA-DQA1;INHBB;IRF4;TLR2;CD40;ICAM1;CDKN2A;HLA-DMB;TAP1;CD80;IL11;TLR6;F2R;SRGN;FGR;F2;CCL22;CCL2;CD8B;CFP;IL2RB;CXCL13;MAP4K1;ITK;CSF1;HLA-E;GBP2;NLRP3;ACHE;PTPN6;HLA-DMA;NOS2;SPI1;ZAP70;TLR1;CCL5;TAP2;CCND3;B2M;WAS;TGFB2;GCNT1;IL27RA;IRF7;CD96;IL16;KLRD1;TGFB1;STAT4;CD247	L3-5IT-3
926	GO_Biological_Process_2023__Protein Insertion Into Mitochondrial Membrane (GO:0051204)	-0.425901	-2.02829	0.00344828	0.0282533	0.939	23/27	48.56%	ROMO1;NDUFA13;TIMM10;TOMM22;TIMM8B;MOAP1;TIMM13;TOMM7;MTX1;HSP90AA1;TIMM8A;TOMM20;TOMM5;TIMM22;MTCH1;TOMM40;TIMM10B;TIMM29;TRMT10B;SAMM50;COX18;HSPA4;TOMM70	L3-5IT-3
927	KEGG_2021_Human__Allograft rejection	0.434779	2.02549	0.00488998	0.0771848	0.934	12/22	12.53%	IL12A;HLA-DOB;HLA-DQA1;HLA-DRB5;CD40;HLA-DMB;CD80;HLA-DQB1;IL5;HLA-E;HLA-DMA;HLA-F	L3-5IT-3
928	GO_Biological_Process_2023__Substantia Nigra Development (GO:0021762)	-0.378532	-2.01821	0	0.0302857	0.955	16/38	18.55%	SYPL2;COX6B1;NDRG2;YWHAH;DYNLL1;PLP1;S100A1;ATP5PF;CALM2;HSPA5;CALM3;CALM1;CNP;NDUFS3;PADI2;SYNGR3	L3-5IT-3
929	WikiPathway_2023_Human__Glycolysis And Gluconeogenesis WP534	-0.377662	-2.01768	0.0016835	0.030165	0.956	30/39	42.43%	GAPDH;TPI1;FBP2;ALDOC;LDHA;LDHB;HK2;ENO3;PGAM1;ENO2;SLC2A2;SLC2A5;GCK;FBP1;MDH2;ENO1;GOT1;PFKL;ALDOA;SLC2A1;MDH1;PGK1;PKM;MPC2;SLC2A3;PFKM;PFKP;PDHA1;GOT2;PC	L3-5IT-3
930	GO_Biological_Process_2023__Regulation Of Extrinsic Apoptotic Signaling Pathway Via Death Domain Receptors (GO:1902041)	0.386856	2.01556	0.00245098	0.0807481	0.947	10/27	8.90%	HMOX1;SERPINE1;NOS3;TNFAIP3;LGALS3;ICAM1;BMP5;SP100;TMC8;CFLAR	L3-5IT-3
931	GO_Biological_Process_2023__Linoleic Acid Metabolic Process (GO:0043651)	0.467639	2.01514	0.00465116	0.0789956	0.947	9/16	13.46%	ALOX5;ALOX15;CYP4A22;ELOVL2;ALOX12B;CYP4A11;GSTM2;ALOXE3;ELOVL1	L3-5IT-3
932	GO_Biological_Process_2023__Pyroptosis (GO:0070269)	-0.442152	-2.01213	0.00336134	0.0315077	0.963	13/24	19.35%	GSDMD;PYCARD;CASP4;CASP1;TRIM21;ELANE;IGF2BP1;NLRP9;NLRC4;NLRP1;CASP8;IFI27;GSDMA	L3-5IT-3
933	GO_Biological_Process_2023__miRNA Metabolic Process (GO:0010586)	0.489376	2.00902	0.00475059	0.0804823	0.955	15/15	51.11%	ZC3H12A;LIN28A;TRIM71;KHSRP;LIN28B;XPO5;TUT4;TENT4B;SND1;PARN;DIS3L2;DDX17;DICER1;TUT7;DDX5	L3-5IT-3
934	GO_Biological_Process_2023__Heterotypic Cell-Cell Adhesion (GO:0034113)	0.40696	2.00506	0.00490196	0.0803069	0.957	13/24	19.12%	ITGA4;DSP;ITGAD;CD58;DSG2;PKP2;IZUMO1;JUP;ITGAV;DSC2;CD200R1;MADCAM1;ITGB2	L3-5IT-3
935	GO_Biological_Process_2023__Cardiac Ventricle Development (GO:0003231)	-0.496592	-1.99665	0.00345423	0.0357213	0.969	7/16	5.60%	HEY2;SALL1;NOTCH1;STRA6;HES1;HEYL;HEY1	L3-5IT-3
936	KEGG_2021_Human__ABC transporters	0.330662	1.99441	0.00259067	0.0848905	0.964	23/44	24.96%	TAP1;ABCA12;ABCC6;ABCB4;ABCA1;ABCC2;ABCC3;ABCB6;ABCA4;ABCG8;TAP2;ABCB5;ABCA13;ABCD1;ABCA7;ABCG5;ABCA10;ABCC9;ABCD4;ABCG4;ABCG1;ABCA5;ABCA9	L3-5IT-3
937	GO_Biological_Process_2023__Sensory Perception Of Light Stimulus (GO:0050953)	0.272203	1.99283	0	0.0838145	0.964	33/82	18.83%	RS1;FSCN2;CABP4;CRYBA1;ROM1;USH1C;CRYBG3;ARR3;CRYGA;GUCY2F;GNAT2;CNGB1;EFEMP1;CRYGB;DHRS3;CRYBB2;MYO7A;VAX2;TULP2;NXNL2;RDH10;PRR4;COL18A1;ADGRV1;CLRN1;CRYZ;AOC2;CRYBB3;PDE6C;PRPH2;WHRN;GPR179;GUCA1B	L3-5IT-3
938	GO_Biological_Process_2023__mRNA Destabilization (GO:0061157)	0.335269	1.99194	0	0.0825146	0.965	38/42	53.53%	PLEKHN1;ZFP36;ZC3H12A;DND1;ZC3H12D;MOV10;ZFP36L1;MEX3D;TRIM71;KHSRP;UPF1;RIDA;DCPS;METTL14;AGO4;METTL16;PDE12;TARDBP;ROCK1;CELF1;TUT4;CNOT1;RC3H2;FXR1;RC3H1;DIS3L2;CPEB3;GIGYF2;AGO3;FTO;PUM1;DHX36;ROCK2;AGO2;TUT7;YTHDF3;YTHDF1;YTHDF2	L3-5IT-3
939	GO_Biological_Process_2023__Fc-gamma Receptor Signaling Pathway Involved In Phagocytosis (GO:0038096)	-0.481694	-1.99098	0	0.0374199	0.976	9/19	12.70%	SYK;PLPP4;YES1;MYO1G;VAV3;LYN;VAV2;VAV1;PRKCD	L3-5IT-3
940	GO_Biological_Process_2023__Positive Regulation Of Activated T Cell Proliferation (GO:0042104)	-0.515775	-1.9908	0.00170068	0.0371506	0.976	10/16	18.21%	PYCARD;IL23A;IL18;IGF1;CD24;HHLA2;TNFSF9;TMIGD2;IL12RB1;ICOSLG	L3-5IT-3
941	GO_Biological_Process_2023__Regulation Of Viral Life Cycle (GO:1903900)	-0.501235	-1.9889	0.00670017	0.0374198	0.976	12/17	27.06%	TRIM21;TRIM38;RFPL1;PPIA;TRIM22;NECTIN2;RFPL3;TRIM5;TRIM62;TRIM68;TRIM58;KPNA2	L3-5IT-3
942	GO_Biological_Process_2023__Monoatomic Cation Homeostasis (GO:0055080)	0.283149	1.98874	0	0.0823866	0.966	24/68	18.56%	TRPV5;CYP4F2;HMOX1;SLC4A11;SCNN1B;SLC24A4;SLC39A12;BMP6;SLC12A3;TESMIN;SLC40A1;CAV1;HAMP;SLC12A4;ITPR3;CYP4A11;HJV;SCNN1A;CIB2;SLC11A1;TFR2;SLC12A1;CLDN16;FAM20A	L3-5IT-3
943	GO_Biological_Process_2023__Positive Regulation Of Protein Kinase B Signaling (GO:0051897)	-0.302847	-1.98502	0.0015456	0.0384645	0.979	41/79	30.56%	CALCR;PIK3CG;CX3CR1;EGFR;PIK3R5;F7;AXL;SEMA5A;IL18;P2RY12;CHI3L1;IGF1;TEK;LRP2;GCNT2;C1QBP;HSP90AB1;HCLS1;LEP;HIP1;HSP90AA1;MAZ;FGF2;MYORG;PHB1;PINK1;TXN;ANGPT1;HAX1;PARK7;F10;RASD2;ENG;SPRY2;TNFAIP8L3;MST1R;CX3CL1;HBEGF;PDGFA;TSPYL5;MYDGF	L3-5IT-3
944	GO_Biological_Process_2023__Dorsal/Ventral Pattern Formation (GO:0009953)	-0.458702	-1.98377	0.00335008	0.0386162	0.979	13/20	26.99%	TBX20;BMPR1B;GREM1;FGF8;SFRP1;SHH;NBL1;WNT8B;FBXL15;GLI2;PTCH1;BMP1;TLL2	L3-5IT-3
945	GO_Biological_Process_2023__Protein Targeting To Mitochondrion (GO:0006626)	-0.329691	-1.98319	0.00322061	0.0385677	0.98	41/57	47.02%	ROMO1;NDUFA13;TSPO;TIMM10;TOMM22;TIMM8B;DNLZ;TIMM17B;CHCHD4;TIMM13;TOMM7;AIP;MTX1;HSP90AA1;FIS1;TIMM8A;TOMM20;BCAP31;TIMM17A;DNAJC19;TOMM5;TIMM22;GRPEL1;MTCH1;TOMM40;TOMM34;PMPCA;GRPEL2;TIMM10B;HSPD1;TIMM44;TIMM50;TIMM29;TRMT10B;MFN2;MFF;TIMM21;FBXO7;SAMM50;HSPA4;AIFM1	L3-5IT-3
946	GO_Biological_Process_2023__Neutrophil Migration (GO:1990266)	0.366506	1.98131	0.00514139	0.08484	0.97	15/32	16.08%	CXCL8;LGALS3;KLF5;CCL25;CCL22;NCKAP1L;PRTN3;PECAM1;CCL2;CXCL13;EDN3;EMP2;CCL5;TGFB2;PIK3CD	L3-5IT-3
947	GO_Cellular_Component_2023__Focal Adhesion (GO:0005925)	-0.219592	-1.98092	0	0.03896	0.98	143/373	27.52%	SHROOM4;EFS;RPS18;TNC;THY1;EGFR;RPL10A;PTPRC;LAYN;RPL19;HSPA8;RPL12;NME2;AIF1L;ANXA1;TMEM98;SPRY4;TRIP6;ITGB5;ATP6V0C;RPL7A;RPS7;HSPG2;RRAS;RPS15;CDC42EP1;ALCAM;RPS3A;CD9;LIMS2;RPS10;RPL13A;RPS4X;RPS13;CALR;ACTC1;FLT1;PFN1;EZR;RPL3;MME;RPS9;RPS14;RND3;SNTB1;RHOG;RPL8;RPS16;ARHGAP24;RPS5;YES1;ITGA2;RPLP2;ARPC5L;PPIA;DYNLL1;ANXA5;RPS11;PGM5;ITGB3;RPL18;RPL9;ADGRE5;CD81;RPS2;RPL6;ARL2;RPLP1;CAT;RPL2…	L3-5IT-3
948	GO_Biological_Process_2023__Negative Regulation Of Apoptotic Process (GO:0043066)	-0.218892	-1.98077	0	0.0387303	0.98	149/408	25.21%	KRT18;CLCF1;TOX3;TBX3;TNFRSF10D;CX3CR1;NGF;POU3F4;PRELID1;NDNF;CIDEA;SPHK1;EGFR;NOTCH1;TBX1;PRDX5;CARD16;NFATC4;HIGD2A;PROC;NME2;BIRC5;ANXA1;FFAR4;CIB1;GSTP1;TRIAP1;SEMA3E;LEF1;RPL10;DHRS2;VIP;RPS3A;GPX1;GREM1;TNFAIP8;FOXO1;UNC5B;PRDX2;SFRP1;AXL;DKK1;TCIM;PTMS;HTR2B;BARD1;GHRL;SHH;IER3;MIEN1;NUAK2;EGR3;SET;ANXA5;IGF1;EVI2B;PLK3;ERBB3;BDNF;MDK;LTK;DDAH2;TEK;LRP2;CAT;CFL1;CDKN2D;MT3;MAG;ALB;HSPA5;C…	L3-5IT-3
949	GO_Biological_Process_2023__Regulation Of Endothelial Cell Proliferation (GO:0001936)	-0.302787	-1.97824	0	0.0393017	0.981	47/83	33.42%	TNMD;SPARC;PROX1;STAT5A;TIE1;PLXNB3;VIP;NR2F2;RGCC;SEMA5A;HTR2B;GHRL;ATP5IF1;EGR3;ITGB3;TNFSF12;TEK;SULF1;APOE;LEP;VEGFA;FGF2;WNT5A;PRKCA;PDCL3;CAV2;ANGPT1;CDH13;BMP2;ECM1;NRARP;HMGB2;ZNF580;NR4A1;STAT1;EGFL7;VASH1;PRKD1;ATP5F1A;MEN1;VEGFB;AGGF1;PRKD2;MYDGF;EMC10;AKT1;PDCD6	L3-5IT-3
950	GO_Biological_Process_2023__Ribosomal Small Subunit Assembly (GO:0000028)	-0.518082	-1.97813	0.00170648	0.0390574	0.981	11/15	31.41%	RPS15;RPS14;RPS5;RPS28;RPS27;RPS19;MRPS7;RPSA;ERAL1;RRP7A;MRPS11	L3-5IT-3
951	GO_Biological_Process_2023__Cellular Response To BMP Stimulus (GO:0071773)	0.295584	1.97763	0.004914	0.085287	0.972	23/55	18.95%	INHBA;SMAD6;INHBB;BMP6;TMEM100;BMP4;GDF6;GDF9;TGFBR3;GDF10;USP9Y;SCX;FAM83G;BMP3;GDF5;HJV;GDF7;VSTM2A;PPARG;TGFB2;SOX9;TGFB1;SMAD9	L3-5IT-3
952	KEGG_2021_Human__B cell receptor signaling pathway	-0.317306	-1.97745	0.00153374	0.038954	0.981	28/68	22.51%	PPP3R2;SYK;NFATC2;CD22;LILRB4;LILRB1;FOS;LILRA2;HRAS;BLNK;VAV3;PIK3AP1;NFKBIE;CD81;DAPP1;LYN;RAC3;BTK;VAV2;VAV1;INPP5D;JUN;PIK3R3;CARD11;NFKBIB;RAC1;RASGRP3;PPP3R1	L3-5IT-3
953	GO_Biological_Process_2023__Immune Response-Activating Cell Surface Receptor Signaling Pathway (GO:0002429)	0.452834	1.97688	0.00229885	0.0840794	0.973	9/17	12.62%	MICB;CR1;C5AR1;C5AR2;FPR2;CMKLR1;FPR1;FPR3;SLA2	L3-5IT-3
954	WikiPathway_2023_Human__Proteasome Degradation WP183	-0.332104	-1.97516	0.00158228	0.0392235	0.981	47/58	51.15%	PSMB6;PSMB10;UBB;PSMC3;PSMC5;UBC;PSMD8;H2AZ1;PSMB9;HLA-B;HLA-A;PSMD10;H2AX;PSME1;HLA-C;PSME2;PSMA7;PSMB4;PSMB5;UCHL3;PSMB3;UCHL1;PSMD7;PSMA4;PSMD2;PSMC4;PSMD3;PSMC1;PSMD4;RPN1;PSMD6;RPN2;PSMA3;UBA1;PSME3;PSMB1;UBE2D1;UBE2B;PSMA5;PSMB2;PSMC2;PSMD12;PSMD13;PSMB7;PSMC6;PSMA1;UBE2D2	L3-5IT-3
955	GO_Biological_Process_2023__Transmembrane Receptor Protein Serine/Threonine Kinase Signaling Pathway (GO:0007178)	0.246145	1.97513	0	0.0835122	0.974	39/114	17.83%	INHBA;ATOH8;HPGD;SMAD6;INHBB;BMP6;TMEM100;BMP4;BMP5;MSTN;GDF6;GDF9;BMP8B;TGFBR3;GDF10;AMH;LTBP2;SMAD3;USP9Y;WFIKKN1;SCX;GDF15;FAM83G;CDH5;BMP3;GDF5;HJV;GDF7;APOA1;INHA;ID1;BMP8A;FERMT2;PPARG;TGFB2;PXN;TGFB1;FOXH1;GDF11	L3-5IT-3
956	GO_Cellular_Component_2023__Vacuolar Proton-Transporting V-type ATPase Complex (GO:0016471)	-0.456405	-1.97494	0.00343053	0.0390376	0.981	14/21	30.62%	ATP6V0C;ATP6V1F;ATP6V0B;ATP6V0D2;ATP6V1G2;CCDC115;TMEM199;RNASEK;ATP6V1G1;ATP6V1C2;ATP6V1D;ATP6V0D1;ATP6V0E2;ATP6V1E1	L3-5IT-3
957	GO_Biological_Process_2023__Defense Response To Bacterium (GO:0042742)	-0.272315	-1.97271	0.00145138	0.0394673	0.981	51/113	22.88%	GSDMD;PYCARD;SYK;CASP4;H2BC12;ROMO1;FAU;RNASE1;SLAMF8;CASP1;H2BC21;PRB3;GBP6;H2BC8;IRGM;STAB1;TFEB;TLR4;LYPD8;RARRES2;GBP1;ELANE;IL23A;IL18;PGLYRP1;TLR3;FCER1G;OAS1;NLRC4;COLEC12;NLRP1;RPL39;PRKCD;ISG15;HLA-A;RPS19;RNF31;EPX;IL6R;NLRP10;GBP7;GBP4;GSDMA;WFDC3;RPL30;HMGB2;CEBPB;PGLYRP2;WFDC2;PPP1R11;STAB2	L3-5IT-3
958	GO_Molecular_Function_2023__Translation Initiation Factor Activity (GO:0003743)	-0.367671	-1.97224	0.00325733	0.0393194	0.981	33/41	48.50%	EIF2S3B;EIF3G;EIF1;EIF1AY;EIF4A2;EIF6;EIF4A1;EIF1B;EIF4G2;EIF1AX;EIF3I;EIF2B2;EIF5;EIF2B4;COPS5;EIF4G1;EIF2B5;EIF3K;EIF2S2;EIF3D;EIF3H;EIF2S3;EIF3B;EIF3L;EIF3J;MTIF3;EIF2B1;EIF3M;MTIF2;EIF2S1;EIF3F;EIF4E2;EIF5B	L3-5IT-3
959	GO_Cellular_Component_2023__Collagen-Containing Extracellular Matrix (GO:0062023)	-0.22539	-1.97109	0	0.0395127	0.983	116/307	20.13%	COL4A5;FGFR2;ADAMDEC1;C1QB;LGALS1;ANGPTL3;COL13A1;TNC;NPNT;POSTN;SPARC;ADAMTS20;COL9A2;MMP23B;SOD3;CLEC14A;SRPX2;VCAN;SPON1;COL1A2;KAZALD1;COL9A1;ANXA1;AZGP1;PODN;MXRA5;COL8A2;ADAMTS4;MFGE8;LGALS3BP;HSPG2;CXCL12;ANXA8;GREM1;F7;RARRES2;COL5A1;C1QC;ELANE;SFRP1;LOXL3;FBLN5;FBN2;NID1;COL24A1;COL6A2;SMOC1;SEMA3B;CBLN1;CCN2;SHH;S100A10;HTRA1;MGP;COL9A3;DCN;INHBE;ANXA5;CBLN4;FGL2;SMOC2;SERPINE2;VWA1;MMR…	L3-5IT-3
960	WikiPathway_2023_Human__Prostaglandin Signaling WP5088	0.468301	1.97091	0.00223714	0.0844038	0.976	10/16	17.70%	CXCL8;PTGES;PTGER4;IL12A;CCL2;CSF1;NLRP3;IRF7;KLRD1;TGFB1	L3-5IT-3
961	MSigDB_Hallmark_2020__Interferon Gamma Response	0.219568	1.97059	0	0.0830126	0.976	57/176	16.81%	SECTM1;EPSTI1;IFI44;NMI;SAMD9L;TNFAIP3;HLA-DQA1;PLA2G4A;LATS2;IRF4;IFI44L;CD40;ICAM1;TXNIP;PARP14;CFH;TAP1;IRF9;ZBP1;PNP;HELZ2;DDX60;PARP12;TNFAIP2;PSMB8;OAS3;MT2A;CMKLR1;IFITM2;CCL2;CDKN1A;MX2;NLRC5;MVP;IL2RB;IFI35;OAS2;FPR1;PIM1;CD274;IL18BP;PTPN6;SELP;HLA-DMA;APOL6;IFIH1;CCL5;NFKBIA;CIITA;BTG1;NOD1;PTGS2;B2M;IFITM3;UBE2L6;IRF7;VAMP8	L3-5IT-3
962	GO_Biological_Process_2023__Activation Of Phospholipase C Activity (GO:0007202)	-0.458704	-1.96812	0.0016835	0.0400766	0.984	13/22	18.16%	AVPR1B;CD86;LPAR1;EGFR;HTR2B;P2RY12;EDNRA;PLCB2;P2RY6;GNA15;ARHGAP6;PHB1;PHB2	L3-5IT-3
963	GO_Biological_Process_2023__Regulation Of Collagen Biosynthetic Process (GO:0032965)	0.469465	1.96765	0.00232558	0.0829744	0.979	10/17	17.70%	BMP4;F2R;SERPINF2;F2;WNT4;EMILIN1;RUNX1;SCX;CIITA;TGFB1	L3-5IT-3
964	KEGG_2021_Human__Neutrophil extracellular trap formation	-0.271547	-1.96736	0.0014771	0.0401094	0.985	57/122	29.58%	GSDMD;SYK;CASP4;H2BC12;SLC25A5;TLR7;CASP1;H2BC21;H3C1;C3;H2BC8;TLR4;ELANE;H4C5;H4C3;PLCB2;ITGAM;CLEC7A;ITGB3;H2AC15;H2AC8;H2BC4;H2AC20;SIGLEC9;H2AZ1;ACTG1;H4C4;CYBA;VWF;CYBB;H2AC6;NCF2;HDAC1;H2AJ;PIK3R3;H2AX;SLC25A4;PRKCA;ACTB;CR1L;AQP9;PPIF;H3-3B;RAC1;ITGAL;VDAC1;SLC25A31;PIK3R2;H2BC15;HDAC10;H2BC5;HDAC9;MAPK12;MAPK3;VDAC2;MAPK11;PLCB3	L3-5IT-3
965	GO_Biological_Process_2023__Long-Chain Fatty Acid Metabolic Process (GO:0001676)	0.282727	1.96718	0	0.0817084	0.979	23/67	14.96%	CYP4F2;PLA2G10;ALOX5;ALOX15;PLA2G4A;CYP3A4;ACADL;LTC4S;CYP4A22;ELOVL2;SLC27A3;CPT1A;ALOX12B;CYP4A11;GSTM2;ALOXE3;ELOVL1;ASAH2;ACOT2;EPHX1;ACOT1;ACSBG2;CYP2D7	L3-5IT-3
966	GO_Cellular_Component_2023__Motile Cilium (GO:0031514)	0.279123	1.96494	0	0.0815836	0.98	31/69	26.02%	OXCT2;CFAP206;CFAP300;DNAH11;ROPN1;RSPH9;CFAP52;TAS2R43;ROPN1B;DNAJB13;CATSPERG;HAVCR1;SAXO1;SCNN1A;DNAH2;DNAH17;RSPH4A;ROPN1L;DRC7;CFAP100;CFAP161;IQUB;MNS1;ODAD4;DNAH9;CFAP70;WDR19;IFT46;GAS8;NPHP1;CFAP221	L3-5IT-3
967	KEGG_2021_Human__Vibrio cholerae infection	-0.351904	-1.96355	0	0.0411962	0.989	25/46	30.97%	ATP6V0C;ATP6V1F;ATP6V0B;ATP6AP1;KCNQ1;ATP6V0D2;ATP6V1G2;SEC61G;ACTG1;PRKCA;ACTB;KDELR3;SEC61B;ATP6V1G1;GNAS;ATP6V1C2;CFTR;ATP6V1D;ATP6V0D1;ARF1;KDELR2;ATP6V0E2;KDELR1;ATP6V1E1;PDIA4	L3-5IT-3
968	GO_Biological_Process_2023__Regulation Of MAPK Cascade (GO:0043408)	-0.249356	-1.96289	0	0.0411421	0.989	84/178	30.95%	ADRA1D;AVPR1B;DUSP4;FGFR2;SYK;DUSP6;LPAR1;EGFR;PTPRC;LAPTM5;IGFBP6;TBX1;LBH;LILRB4;GSTP1;ADRA2C;RRAS;DUSP9;GREM1;FLT1;ADRA2A;SLA;GRAP2;STYXL2;GHRL;HLA-DRB1;PPIA;GPR37;IGF1;PEBP1;CD24;HRAS;WDR54;SOX2;GPR37L1;CD81;TEK;CSF1R;LYN;VRK2;INAVA;CAV3;LEP;SOD1;LAMTOR1;DUSP2;CD74;PSMD10;FGF2;ADRA1B;CAV2;REN;ATP6AP2;PHB2;SPRED3;SPRED1;CD4;AVPI1;GPER1;BMP2;PLCE1;DUSP16;TRIM5;DUSP5;DOK3;DOK5;DUSP1;CHRNA7;PIK3R…	L3-5IT-3
969	MSigDB_Hallmark_2020__DNA Repair	-0.257546	-1.96274	0.00146843	0.0409106	0.989	100/148	47.71%	APRT;GPX4;POLR2I;TYMS;NME1;NT5C;BCAM;MRPL40;CDA;GUK1;EDF1;POLR3GL;SUPT4H1;ALYREF;POLR2K;SAC3D1;POLR2J;VPS28;SNAPC5;HCLS1;SURF1;RPA3;POLD4;ADRM1;PCNA;VPS37D;FEN1;NME3;CETN2;EIF1B;NUDT21;ARL6IP1;PRIM1;NME4;POLE4;BCAP31;POLR2G;IMPDH2;TAF10;BRF2;TARBP2;MPG;NELFE;CMPK2;GMPR2;AK1;GTF2F1;TAF13;ERCC2;COX17;POLR2E;GTF2H5;POLR2C;NELFB;AAAS;POLR2H;MPC2;USP11;PDE4B;SSRP1;SUPT5H;TMED2;DAD1;NELFCD;NCBP2;CANT1;…	L3-5IT-3
970	WikiPathway_2023_Human__Hair Follicle Development Cytodifferentiation Part 3 Of 3 WP2840	-0.3152	-1.95738	0.0015674	0.0424306	0.992	21/64	10.28%	KLK7;EGFR;ADAMTS20;NOTCH1;LGR5;KLK6;KLK5;FOSB;EGR2;LEF1;BCL11B;ELANE;SFRP1;CD34;DKK1;FOS;CCN2;WIF1;SPINK5;IGF1;SOX2	L3-5IT-3
971	GO_Biological_Process_2023__Negative Regulation Of Interleukin-1 Beta Production (GO:0032691)	-0.427191	-1.95712	0.00172414	0.0422007	0.992	14/24	18.20%	CX3CR1;PYDC1;CARD16;LILRB4;FFAR4;GSTP1;CD33;GHRL;ELF4;IGF1;FFAR1;CPTP;NLRP2B;CARD8	L3-5IT-3
972	GO_Biological_Process_2023__Positive Regulation Of Interleukin-1 Production (GO:0032732)	-0.342806	-1.95579	0.00168067	0.042379	0.992	23/48	21.97%	GSDMD;MNDA;PYCARD;PYDC1;TYROBP;CASP1;PYHIN1;TLR4;EGR1;LILRA2;CLEC7A;NLRC4;LCP1;NLRP1;INAVA;FZD5;S100A13;NLRP10;WNT5A;CASP8;CARD8;NLRP2;AIM2	L3-5IT-3
973	KEGG_2021_Human__Phagosome	-0.267333	-1.95277	0	0.0432768	0.993	51/128	21.94%	HLA-DPA1;TUBB2A;C3;ITGB5;TUBB1;ATP6V0C;TUBA4A;TLR4;CALR;ATP6V1F;RILP;HLA-DOA;ITGA2;ATP6V0B;HLA-DRB1;ITGAM;CD14;CLEC7A;ITGB3;OLR1;TUBA1A;TUBB4B;MRC1;ATP6AP1;TUBA1B;COLEC12;HLA-DPB1;ATP6V0D2;TUBB4A;HLA-DRA;THBS2;ATP6V1G2;SEC61G;ACTG1;CYBA;HLA-B;CYBB;HLA-A;NCF2;RAB5C;HLA-C;ITGA5;TUBB;MRC2;ACTB;C1R;NOS1;SEC61B;ATP6V1G1;RAC1;CORO1A	L3-5IT-3
974	WikiPathway_2023_Human__Influence Of Laminopathies On Wnt Signaling WP4844	-0.394148	-1.95202	0.00164474	0.0432665	0.994	16/32	24.63%	HES5;HES1;LEF1;CCND1;RUNX2;SPP1;CDK6;EMD;TCF7L1;HMGA2;WNT10B;CEBPD;CEBPB;CEBPA;TARBP2;ICMT	L3-5IT-3
975	GO_Biological_Process_2023__Establishment Of Protein Localization To Mitochondrion (GO:0072655)	-0.354417	-1.95133	0.00162866	0.0431948	0.994	26/43	35.05%	ROMO1;TSPO;TIMM10;TOMM22;TIMM8B;DNLZ;HK2;TIMM17B;CHCHD4;TIMM13;TOMM7;AIP;FIS1;TOMM20;PINK1;BCAP31;TIMM17A;DNAJC19;TOMM5;GRPEL1;TOMM40;TOMM34;AKT1;GRPEL2;HSPD1;TIMM44	L3-5IT-3
976	GO_Biological_Process_2023__Protein Targeting To ER (GO:0045047)	-0.442456	-1.9504	0.00340716	0.0432805	0.994	17/23	39.56%	SRP14;UBL4A;SPCS1;SEC61G;GET3;GET4;ZFAND2A;ZFAND2B;CHMP4A;SRP9;MAN1A1;SGTA;SEC62;SRPRA;SRPRB;SPCS3;SPCS2	L3-5IT-3
977	GO_Cellular_Component_2023__U4/U6 X U5 tri-snRNP Complex (GO:0046540)	-0.370228	-1.94934	0.00327332	0.0429982	0.995	27/35	46.13%	LSM7;SNRPD2;RBM42;SNU13;LSM4;LSM2;SNRPB;SNRPE;LSM3;ZMAT2;SNRPA;SNRPN;PRPF31;DDX23;SNRPD3;TXNL4B;SART1;SNRPG;SNRNP27;PRPF8;SNRPD1;PRPF4;TXNL4A;PPIH;PRPF6;SNRNP200;LSM5	L3-5IT-3
978	GO_Cellular_Component_2023__Spliceosomal tri-snRNP Complex (GO:0097526)	-0.370228	-1.94934	0.00327332	0.0429982	0.995	27/35	46.13%	LSM7;SNRPD2;RBM42;SNU13;LSM4;LSM2;SNRPB;SNRPE;LSM3;ZMAT2;SNRPA;SNRPN;PRPF31;DDX23;SNRPD3;TXNL4B;SART1;SNRPG;SNRNP27;PRPF8;SNRPD1;PRPF4;TXNL4A;PPIH;PRPF6;SNRNP200;LSM5	L3-5IT-3
979	KEGG_2021_Human__Cell adhesion molecules	0.238482	1.94867	0	0.0890946	0.988	39/122	14.68%	ITGA4;HLA-DOB;CLDN1;HLA-DQA1;HLA-DRB5;CLDN9;ITGB8;SPN;CD40;ICAM1;HLA-DMB;SIGLEC1;CD80;ITGA8;ITGA6;SELPLG;SELE;CD58;CLDN14;CLDN34;HLA-DQB1;PECAM1;CLDN6;CLDN18;SELL;CD8B;CDH5;ITGA9;CD274;HLA-E;SELP;IGSF11;HLA-DMA;HLA-F;CLDN15;F11R;CLDN4;ITGAV;CD6	L3-5IT-3
980	GO_Biological_Process_2023__Ventricular Septum Morphogenesis (GO:0060412)	-0.427853	-1.947	0.00170648	0.0434443	0.995	9/24	5.60%	TGFBR2;SOX11;HEY2;NOTCH1;PROX1;HES1;SOX4;HEYL;HEY1	L3-5IT-3
981	KEGG_2021_Human__Hematopoietic cell lineage	-0.308743	-1.94698	0.00307692	0.0431745	0.995	31/65	18.82%	CSF3R;HLA-DPA1;CD22;ANPEP;CD37;CD9;IL2RA;CD34;MME;CD33;HLA-DOA;ITGA2;IL7R;HLA-DRB1;ITGAM;CD14;CD24;ITGB3;CSF1R;HLA-DPB1;HLA-DRA;GYPA;IL4R;IL6R;CD55;CD38;IL7;ITGA5;EPOR;CR1L;CD4	L3-5IT-3
982	GO_Cellular_Component_2023__Organelle Envelope Lumen (GO:0031970)	-0.314901	-1.94519	0.00313972	0.0435282	0.995	26/64	22.01%	PRELID1;TUBB2A;BLOC1S1;TRIAP1;HCRT;CHCHD2;TIMM10;TIMM8B;ALPL;CHCHD10;NDUFB7;CHCHD4;ARL2;STOML2;HTRA2;TIMM13;CYCS;CHCHD5;SOD1;COA7;TIMM8A;PINK1;COA4;HAX1;NDUFA8;NME4	L3-5IT-3
983	GO_Molecular_Function_2023__Transmembrane Receptor Protein Kinase Activity (GO:0019199)	0.348417	1.94267	0	0.091546	0.993	17/34	18.13%	ROS1;KIT;KDR;EPHA1;EPHB4;ERBB4;ROR1;FLT3;ROR2;NTRK1;INSRR;RET;ALK;DDR2;MERTK;NTRK3;ERBB2	L3-5IT-3
984	GO_Biological_Process_2023__Positive Regulation Of Peptidyl-Tyrosine Phosphorylation (GO:0050731)	0.251375	1.94065	0	0.091276	0.993	34/98	15.84%	ANGPT4;KIT;CSPG4;HGF;IL12A;PARP9;CLEC6A;BMP6;CD40;ERBB4;DOK7;PARP14;IL23R;CD80;NOX4;IL11;FLT3;FGF10;PECAM1;CD44;FGFR3;AMH;IL5;TNFRSF14;VTN;CASS4;EFNA1;TNFSF18;PLCG2;ACE;CCL5;TP53;PDGFB;AGT	L3-5IT-3
985	WikiPathway_2023_Human__Kallmann Syndrome WP5074	-0.469815	-1.94017	0.00546448	0.044894	0.997	9/20	13.41%	OLIG2;TMEM98;SEMA3E;FGF8;ANOS1;MYRF;CHD7;ASCL1;SOX10	L3-5IT-3
986	GO_Cellular_Component_2023__Sperm Flagellum (GO:0036126)	0.313404	1.94014	0.00265252	0.0900067	0.993	26/46	28.85%	TEKT5;TTLL8;TTC29;DNAI2;RSPH6A;DCDC2C;TACR1;DNAJB13;LYZL4;SAXO1;DNAH2;DNAH17;FLACC1;CFAP58;QRICH2;CFAP74;TEKT3;CABCOCO1;CFAP70;GAS8;TTLL3;WBP2NL;ATP2B4;RPGR;DNHD1;DNAH1	L3-5IT-3
987	MSigDB_Hallmark_2020__UV Response Up	-0.25899	-1.93936	0	0.0448875	0.997	91/149	39.67%	GAL;CA2;CCK;SELENOW;GPX3;FOSB;NPTX2;CDKN1C;TUBA4A;ATP6V1F;C4BPB;SLC6A12;PSMC3;HYAL2;FOS;APOM;TACR3;TST;PDLIM3;NAT1;SPR;MRPL23;LYN;BTG3;PRKCD;HSPA2;CNP;UROD;ENO2;DNAJA1;POLE3;FKBP4;H2AX;GRINA;AP2S1;SLC25A4;OLFM1;RHOB;JUNB;PDAP1;FEN1;SIGMAR1;CHRNA5;NPTXR;PPIF;BMP2;ABCB1;NR4A1;ATF3;BSG;SLC6A8;KLHDC3;CDC34;ALDOA;CHKA;EIF5;CYB5R1;GCH1;HSPA13;IRF1;YKT6;DGAT1;GRPEL1;ACAA1;FURIN;IL6ST;RXRB;MAPK8IP2;CLTB;…	L3-5IT-3
988	GO_Biological_Process_2023__Cellular Response To Estradiol Stimulus (GO:0071392)	-0.483136	-1.93913	0.00368324	0.0446803	0.997	11/16	29.36%	EGFR;ZNF703;SFRP1;CRHBP;H2AZ1;SSTR1;GPER1;KAT5;SSTR2;RUVBL2;FAM210B	L3-5IT-3
989	MSigDB_Hallmark_2020__Myogenesis	-0.245749	-1.93844	0	0.0447073	0.998	76/171	28.10%	PVALB;EFS;CACNA1H;PYGM;SPHK1;SPARC;NOTCH1;ACTA1;SOD3;LSP1;COX7A1;OCEL1;GPX3;ITGB5;HSPB2;ACTC1;MYL7;CKM;ADAM12;CKB;CTF1;COL6A2;SH3BGR;CSRP3;CHRNB1;MYH11;TEAD4;IGF1;ANKRD2;ERBB3;FKBP1B;ENO3;CASQ1;ATP6AP1;GABARAPL2;ITGB4;EPHB3;CHRNA1;CAV3;LDB3;CKMT2;FXYD1;FGF2;BAG1;COL6A3;SCD;FABP3;GADD45B;SYNGR2;EIF4A2;CRYAB;TNNT1;MYL3;MYL6B;CDH13;NOS1;TPM2;SGCD;CLU;PRNP;PDLIM7;MYH3;PTGIS;APOD;SLC6A8;ITGA7;AGRN;SSP…	L3-5IT-3
990	KEGG_2021_Human__Inflammatory bowel disease	0.324477	1.93819	0.00510204	0.0896249	0.994	19/42	17.84%	IL12A;HLA-DOB;TLR5;HLA-DQA1;IL18R1;HLA-DRB5;TLR2;HLA-DMB;IL23R;HLA-DQB1;NFATC1;SMAD3;IL5;FOXP3;HLA-DMA;RELA;TGFB2;TGFB1;STAT4	L3-5IT-3
991	GO_Cellular_Component_2023__Cell-Substrate Junction (GO:0030055)	-0.214093	-1.93757	0	0.0447532	0.998	144/379	27.52%	SHROOM4;EFS;RPS18;TNC;THY1;EGFR;RPL10A;PTPRC;LAYN;RPL19;HSPA8;RPL12;NME2;AIF1L;ANXA1;TMEM98;SPRY4;TRIP6;ITGB5;ATP6V0C;RPL7A;RPS7;HSPG2;RRAS;RPS15;CDC42EP1;ALCAM;RPS3A;CD9;LIMS2;RPS10;RPL13A;RPS4X;RPS13;CALR;ACTC1;FLT1;PFN1;EZR;RPL3;MME;RPS9;RPS14;RND3;SNTB1;RHOG;RPL8;RPS16;ARHGAP24;RPS5;YES1;ITGA2;RPLP2;ARPC5L;PPIA;DYNLL1;ANXA5;RPS11;PGM5;ITGB3;RPL18;RPL9;ADGRE5;CD81;RPS2;RPL6;ARL2;RPLP1;CAT;RPL2…	L3-5IT-3
992	GO_Biological_Process_2023__Cardiac Epithelial To Mesenchymal Transition (GO:0060317)	-0.473157	-1.9364	0.0017331	0.0449259	0.998	8/18	5.60%	HAS2;TBX3;HEY2;NOTCH1;SPRY1;HEYL;FGF8;HEY1	L3-5IT-3
993	GO_Biological_Process_2023__Regulation Of B Cell Proliferation (GO:0030888)	-0.385086	-1.93424	0.00318979	0.0453178	0.998	15/33	16.91%	MNDA;CLCF1;PTPRC;TYROBP;NFATC2;CD22;SASH3;VAV3;CD81;LYN;TNFRSF4;CD74;CD38;IL7;TNFRSF13C	L3-5IT-3
994	WikiPathway_2023_Human__Epithelial To Mesenchymal Transition In Colorectal Cancer WP4239	0.229143	1.93283	0	0.0915366	0.994	52/142	21.58%	TWIST1;SNAI1;CLDN1;WNT9A;TWIST2;DSP;CLDN9;LATS2;WNT16;FZD7;COL4A6;FZD8;DLL4;JAG1;WNT2;FOXQ1;FZD9;WNT11;WNT9B;CLDN14;FOXM1;WNT4;CLDN6;CLDN18;PKP2;SMAD3;GDF15;COL4A2;FZD1;VTN;NOTCH2;MMP2;JUP;COL4A1;CLDN15;WNT8A;CLDN4;TP53;ID1;TGFB2;PIK3CD;CLDN16;TGFB1;WNT3;OCLN;WNT7A;WNT5B;MAP2K3;WNT2B;DLL1;FZD6;COL4A3	L3-5IT-3
995	GO_Biological_Process_2023__Carbohydrate Biosynthetic Process (GO:0016051)	0.393096	1.92966	0.00487805	0.0918628	0.995	11/23	21.21%	FUT3;B4GALNT2;FUT6;B3GALT5;ST8SIA6;ST6GALNAC1;FUT1;B4GALT1;FUT4;FUT2;ST3GAL4	L3-5IT-3
996	GO_Biological_Process_2023__Positive Regulation Of Protein Catabolic Process (GO:0045732)	-0.292378	-1.92849	0.0015674	0.047189	0.998	28/86	16.56%	TNFRSF1B;ASB5;NDUFA13;C4BPA;VIP;FOXO1;C4BPB;ADRA2A;EZR;PSMC3;BARD1;RILP;PLK3;PSMC5;PACSIN3;TNFSF12;OAZ1;CD81;VPS28;ASB9;OAZ3;NKD1;APOE;MSN;HSP90AA1;GPC3;WNT5A;DACT1	L3-5IT-3
997	GO_Biological_Process_2023__Hexose Biosynthetic Process (GO:0019319)	-0.396666	-1.92538	0.00321027	0.047957	0.998	18/30	30.33%	KRT17;TPI1;SLC25A10;ENO3;SLC25A1;PGAM1;PCK2;ATF4;ENO2;PER2;SLC37A4;FBP1;MDH2;ENO1;MDH1;PGK1;G6PC3;CHST15	L3-5IT-3
998	GO_Biological_Process_2023__Regulation Of Nervous System Development (GO:0051960)	-0.356487	-1.92415	0.00652529	0.048194	0.999	20/40	25.23%	CX3CR1;HEY2;TNFRSF1B;HES5;NKX6-2;HES1;LEF1;HEYL;HEY1;S100A10;TYMP;HES2;ASCL1;PTN;PER2;HES6;HMGB2;BHLHE41;PTPRZ1;NSUN5	L3-5IT-3
999	GO_Biological_Process_2023__Positive Regulation Of NIK/NF-kappaB Signaling (GO:1901224)	-0.341968	-1.92291	0.00165563	0.0484035	0.999	19/45	18.88%	CD86;PYCARD;SPHK1;EGFR;LAPTM5;TLR7;TRIP6;TLR4;IL23A;TRIM56;C1QTNF4;TCIM;TLR3;CD27;LRRC19;PHB1;PHB2;TRADD;SASH1	L3-5IT-3
1000	GO_Biological_Process_2023__Tail-Anchored Membrane Protein Insertion Into ER Membrane (GO:0071816)	-0.501925	-1.92273	0.00172712	0.048199	0.999	15/16	45.55%	EMC6;EMC9;UBL4A;GET3;GET4;EMC4;EMC7;MMGT1;EMC10;SGTA;GET1;EMC8;CAMLG;EMC2;EMC3	L3-5IT-3
1001	GO_Biological_Process_2023__Positive Regulation Of Wound Healing (GO:0090303)	0.338517	1.9207	0.00253807	0.0964874	0.997	16/35	18.30%	CLDN1;SERPINE1;RREB1;F2R;EMILIN2;HPSE;F2;EMILIN1;VTN;CLDN4;THBS1;APOH;DUOX1;FERMT1;FERMT2;OCLN	L3-5IT-3
1002	GO_Biological_Process_2023__Regulation Of Interleukin-10 Production (GO:0032653)	-0.399658	-1.91687	0.00651466	0.0501408	0.999	13/31	13.67%	PYCARD;SYK;TYROBP;LILRB4;LILRB1;VSIR;TLR4;IL23A;HLA-DRB1;CLEC7A;TRIB2;INAVA;ISG15	L3-5IT-3
1003	GO_Biological_Process_2023__Regulation Of Neuron Differentiation (GO:0045664)	-0.302675	-1.91601	0.00156495	0.0502021	0.999	28/69	24.02%	SOX11;NGF;HES5;RELN;PCP4;HES1;ADRA2C;HEYL;CALR;HEY1;DKK1;CASZ1;YWHAH;BDNF;MMD2;SOX2;LTK;TUNAR;NBL1;ASCL1;GPRC5B;BMP7;REST;BMP2;ID2;CDK5R1;MMD;NREP	L3-5IT-3
1004	GO_Biological_Process_2023__Positive Regulation Of Interleukin-1 Beta Production (GO:0032731)	-0.346603	-1.91471	0.00507614	0.050462	0.999	21/43	21.97%	GSDMD;MNDA;PYCARD;PYDC1;TYROBP;CASP1;PYHIN1;TLR4;EGR1;LILRA2;CLEC7A;NLRC4;LCP1;NLRP1;INAVA;FZD5;WNT5A;CASP8;CARD8;NLRP2;AIM2	L3-5IT-3
1005	GO_Biological_Process_2023__Aortic Valve Morphogenesis (GO:0003180)	0.344765	1.91218	0.00959233	0.100778	0.997	13/33	11.49%	TWIST1;ROBO1;SNAI1;NOS3;SMAD6;BMP4;DLL4;JAG1;ELN;EMILIN1;NFATC1;SLIT2;EFNA1	L3-5IT-3
1006	GO_Biological_Process_2023__Regulation Of Actin Cytoskeleton Organization (GO:0032956)	-0.288865	-1.90858	0.00291545	0.052251	1	36/84	25.62%	ARHGDIB;DAAM2;SEMA3E;PDGFRA;IQGAP2;BST2;EZR;RHOG;ESAM;EPS8;MYO3A;DYNLL1;HRAS;MDK;CSF1R;SIGLEC15;RAC3;PRKCD;RAPGEF3;SMIM22;ARHGDIA;GRHL3;SH3BP1;SLC4A2;NEDD9;HAX1;RAC1;CLU;CORO1A;FSCN1;MLST8;TWF2;CARMIL2;ARHGAP18;TESK1;RNH1	L3-5IT-3
1007	WikiPathway_2023_Human__Translation Factors WP107	-0.335193	-1.90784	0.00302572	0.0523289	1	37/48	49.30%	EIF5A;EEF1B2;EIF3G;EIF1;EIF1AY;EEF1A2;EIF4A2;GSPT2;EIF6;EEF2;EIF4A1;EIF1AX;EEF1A1;EIF3I;EIF2B2;CLUH;EIF5;EIF2B4;EIF4G1;EIF2B5;EEF1D;EIF2S2;EIF3D;EIF3H;EIF2S3;EIF3B;EIF3J;EIF2B1;EIF4H;EIF2S1;EIF3F;EIF2AK1;EIF3A;ETF1;EIF4B;EIF5B;PAIP1	L3-5IT-3
1008	WikiPathway_2023_Human__White Fat Cell Differentiation WP4149	-0.409414	-1.90767	0.00830565	0.0521283	1	15/28	21.13%	EBF1;STAT5A;EGR2;NR2F2;FOXO1;DDIT3;MECOM;KLF2;TLE3;TCF7L1;WNT10B;KLF15;CEBPD;CEBPB;CEBPA	L3-5IT-3
1009	GO_Molecular_Function_2023__G Protein-Coupled Receptor Binding (GO:0001664)	-0.267643	-1.90746	0	0.05193	1	37/109	16.84%	PENK;WNT6;GNAT3;RTP1;POMC;NPB;BAMBI;HSPA8;CORT;S1PR2;CXCL12;HOMER3;SFRP1;GHRL;WNT7B;STUB1;PSMC5;INSL3;WNT3A;NPPA;GIP;ITGB4;PNOC;WNT8B;GNA15;NPW;C1QBP;HSPA1A;GPRC5B;CCDC88C;FCN1;DNAJA1;GPHB5;WNT10A;WNT5A;PHB1;WNT10B	L3-5IT-3
1010	WikiPathway_2023_Human__Burn Wound Healing WP5055	0.292844	1.90587	0.00529101	0.103416	0.997	23/55	16.93%	CXCL8;INHBA;HGF;FGFR4;CXCR4;AMBP;ICAM1;SERPINH1;NOX4;FLG;ELN;LIN28A;PECAM1;CCL2;FGFR3;SMAD3;EGF;ACHE;MMP2;TP53;TGFB2;TAGLN;F13A1	L3-5IT-3
1011	GO_Biological_Process_2023__Regulation Of NIK/NF-kappaB Signaling (GO:1901222)	-0.299823	-1.90537	0.00154321	0.0523881	1	29/70	21.67%	CD86;PYCARD;SPHK1;EGFR;LAPTM5;TLR7;TRIP6;TLR4;UACA;IL23A;TRIM56;EZR;C1QTNF4;RASSF2;TCIM;TLR3;TMSB4X;CCN3;TRIM60;CD27;LRRC19;BCL3;PHB1;BMP7;PHB2;TRADD;SASH1;NLRP2;TSPAN6	L3-5IT-3
1012	GO_Biological_Process_2023__Regulation Of Interleukin-8 Production (GO:0032677)	-0.315786	-1.90437	0	0.0524809	1	24/61	15.71%	PYCARD;SYK;PTPRC;TLR7;ANXA1;CD244;TLR4;ELANE;CD33;HYAL2;DDIT3;TLR3;TMSB4X;LILRA2;CHI3L1;CD14;CLEC7A;HSPA1A;LEP;CD74;FCN1;LAMTOR5;BCL3;NLRP10	L3-5IT-3
1013	WikiPathway_2023_Human__Cholesterol Biosynthesis Pathway WP197	-0.503984	-1.90427	0.00679117	0.0522435	1	13/15	37.79%	IDI1;HMGCS1;PMVK;SQLE;MSMO1;NSDHL;DHCR7;FDPS;MVK;HMGCR;SC5D;FDFT1;MVD	L3-5IT-3
1014	GO_Biological_Process_2023__Extracellular Matrix Organization (GO:0030198)	-0.252236	-1.90121	0	0.0532039	1	49/146	15.37%	COL4A5;HAS2;KLK7;COL13A1;NDNF;NPNT;POSTN;ADAMTS20;ADAMTS12;COL9A2;MMP23B;SPINT1;COL1A2;COL9A1;KLK5;COL8A2;ADAMTS4;MMP19;GREM1;COL5A1;ELANE;MMP20;LOXL3;NID1;COL24A1;SMOC1;NOXO1;ADAMTS6;COL9A3;SPINK5;CYP1B1;ADAMTS18;SMOC2;ADAMTS7;MMP15;COL22A1;ADAMTS1;COL5A3;ADAMTS5;LCP1;HPSE2;VIT;CREB3L1;HAS1;ADAMTS15;CAPG;COL14A1;CCDC80;MMP26	L3-5IT-3
1015	GO_Biological_Process_2023__Regulation Of Protein Kinase B Signaling (GO:0051896)	-0.262657	-1.90098	0	0.0530566	1	57/118	30.95%	CALCR;PIK3CG;CX3CR1;RCAN3;EGFR;PIK3R5;CIB1;RRAS;F7;AXL;SEMA5A;IL18;HYAL2;DDIT3;P2RY12;CHI3L1;IGF1;TEK;LRP2;GCNT2;C1QBP;HSP90AB1;GATA4;HCLS1;NOP53;LEP;HIP1;PHLDA3;HSP90AA1;MAZ;FGF2;MYORG;PHB1;PPARA;PINK1;TXN;ANGPT1;GPER1;HAX1;PARK7;F10;PPP2CA;RACK1;RASD2;AIM2;ENG;SPRY2;TNFAIP8L3;MUL1;MST1R;CX3CL1;HBEGF;GRM2;PDGFA;TSPYL5;MYDGF;PPP2R1A	L3-5IT-3
1016	GO_Biological_Process_2023__protein-RNA Complex Assembly (GO:0022618)	-0.250326	-1.90029	0	0.0530302	1	84/143	45.33%	RAMAC;RPL10;RPS15;EIF2S3B;RPS14;GEMIN7;RPS5;EIF3G;TSSC4;RPS28;RPL6;RPS27;HSP90AB1;SNRPD2;NOP53;RPL11;RPL38;RPL23A;RPS19;HSP90AA1;RRS1;LSM4;MRPS7;RPLP0;PUF60;EIF6;BOP1;NOP2;NUDT21;SNRPB;RPSA;ERAL1;SNRPE;PPAN;MRPL20;GEMIN6;RPL5;TARBP2;GEMIN4;XAB2;EIF3I;TRAF7;HEXIM1;EIF5;RRP7A;NLE1;SF3A2;MRPS11;PRMT5;DDX23;SNRPD3;CELF3;STRAP;EIF3K;SART1;PTGES3;BRIX1;SNRPG;DDX20;SRSF9;GEMIN8;EIF2S2;CELF5;COIL;PRPF19;…	L3-5IT-3
1017	GO_Biological_Process_2023__Regulation Of Blood Circulation (GO:1903522)	-0.401465	-1.89977	0.00165837	0.0529419	1	12/26	16.01%	KCNG2;TMIGD3;CACNA1H;CYP2J2;ACE2;KCNMB2;S100A1;KCNQ1;CAV3;PLN;FXYD1;PER2	L3-5IT-3
1018	GO_Biological_Process_2023__Defense Response To Gram-positive Bacterium (GO:0050830)	-0.370726	-1.89898	0.00325203	0.0530177	1	20/36	22.88%	GSDMD;CASP4;H2BC12;ROMO1;FAU;RNASE1;H2BC21;GBP6;H2BC8;RARRES2;IL18;PGLYRP1;RPL39;HLA-A;GBP7;GBP4;HMGB2;PGLYRP2;PPP1R11;STAB2	L3-5IT-3
1019	GO_Biological_Process_2023__Positive Regulation Of Adenylate Cyclase Activity (GO:0045762)	-0.457951	-1.89895	0	0.0527457	1	9/19	15.62%	CALCR;TMIGD3;DRD5;GIPR;EDNRA;ADORA2B;ADCYAP1;ORAI1;CRHR1	L3-5IT-3
1020	MSigDB_Hallmark_2020__Unfolded Protein Response	-0.271155	-1.89546	0.00145773	0.0539408	1	75/110	49.30%	TUBB2A;EXOSC4;NHP2;CALR;RPS14;BANF1;IMP3;YIF1A;CHAC1;RRP9;HSPA5;DDIT4;SPCS1;ATF4;MTHFD2;VEGFA;DNAJB9;LSM4;H2AX;EXOSC5;EIF4A2;POP4;KDELR3;EEF2;EIF4A1;CEBPB;TATDN2;WFS1;ATF3;DCTN1;GEMIN4;NOLC1;XBP1;PREB;LSM1;CKS1B;SHC1;HSP90B1;ATP6V0D1;DKC1;HYOU1;IFIT1;EIF4A3;ARFGAP1;NPM1;TSPYL2;EIF4G1;YWHAZ;TARS1;HERPUD1;PSAT1;FKBP14;SRPRA;SRPRB;SPCS3;CEBPG;NOP56;DNAJA4;EXOSC9;EXOSC2;HSPA9;EXOSC1;NFYA;EIF2S1;ZBTB1…	L3-5IT-3
1021	GO_Biological_Process_2023__DNA Synthesis Involved In DNA Repair (GO:0000731)	0.361241	1.89372	0.0071599	0.108982	0.999	19/27	37.48%	SYCP1;HROB;POLD1;PARP10;USP43;RFC3;PCLAF;POLN;TNFSF13B;PRIMPOL;POLE;RRM1;ZBTB1;POLI;POLH;SIRT1;POLD3;WRN;POLA1	L3-5IT-3
1022	GO_Molecular_Function_2023__G Protein-Coupled Receptor Activity (GO:0004930)	-0.244018	-1.89211	0	0.0549054	1	69/176	21.23%	HCRTR1;GPR26;NPY;P2RY1;GALR1;CX3CR1;GPR6;NPBWR2;GPR62;LPAR1;CYSLTR2;GPR171;LGR5;GPRC6A;PGR;RGR;OPRK1;GPR20;FFAR4;GPR17;NPFFR2;S1PR2;VIPR2;DRD5;OPN1SW;GPR87;GPR18;P2RY13;ADGRF5;RHO;ADGRG6;P2RY12;GPR34;GIPR;ADORA2B;P2RY6;GPR37;GPR150;LPAR3;FFAR1;LGR6;CYSLTR1;QRFPR;ADGRE5;GPR37L1;C3AR1;ADGRE3;GPR143;MAS1;ADGRL4;NTSR1;GPR65;SSTR3;P2RY14;OPRL1;MCHR1;NTSR2;CRHR1;PTH1R;PTAFR;GRPR;NPFFR1;TSHR;GNRHR;GPER1…	L3-5IT-3
1023	GO_Biological_Process_2023__Regulation Of Inflammatory Response (GO:0050727)	-0.236355	-1.89146	0	0.0549472	1	72/183	24.40%	GSDMD;PYCARD;LGALS1;CASP4;TNFRSF1B;TNC;SPHK1;ADAMTS12;CARD16;TLR7;CASP1;PROC;ETS1;ACE2;ANXA1;FFAR4;IRGM;TLR4;ELANE;IL23A;DDT;IL18;HYAL2;TLR3;TMSB4X;GHRL;IGF2BP1;ELF4;CCN3;TNFAIP6;NLRP9;NLRC4;MDK;PIK3AP1;TEK;LCP1;NLRP1;PRKCD;IL15;LACC1;GPRC5B;VAMP2;APOE;NINJ1;TNFRSF1A;LRRC19;MMP26;NLRP10;AHSG;WNT5A;FNDC4;PPARA;TRADD;IL10RA;GPER1;BIRC3;SELENOS;GRN;PARK7;NR1D1;GPS2;NLRP2;CAMK2N1;CEBPA;AKNA;AIM2;MACI…	L3-5IT-3
1024	GO_Biological_Process_2023__Collagen Fibril Organization (GO:0030199)	0.331427	1.88958	0.00520833	0.110445	0.999	19/37	22.98%	DPT;ADAMTS2;COL27A1;ADAMTS3;LOXL1;SERPINH1;COL5A2;SERPINF2;LOXL4;LOX;SCX;PXDN;COL18A1;DDR2;TGFB2;LOXL2;P3H4;PLOD3;TGFBR1	L3-5IT-3
1025	WikiPathway_2023_Human__Lung Fibrosis WP3624	0.317854	1.88254	0.0075188	0.113785	0.999	19/45	15.57%	CXCL8;HGF;HMOX1;DSP;SFTPA1;TGFA;SFTPA2;ELN;MT2A;CCL2;IL5;TERT;EGF;MMP2;CCL5;SFTPC;RTEL1;PDGFB;STN1	L3-5IT-3
1026	GO_Biological_Process_2023__Positive Regulation Of Tyrosine Phosphorylation Of STAT Protein (GO:0042531)	-0.379269	-1.88238	0.00487013	0.0583557	1	16/32	15.14%	CLCF1;HES5;HES1;IL23A;TNFRSF18;IL18;CTF1;PTK6;IGF1;CSF1R;LYN;HCLS1;IL15;TNFRSF1A;VEGFA;IL6R	L3-5IT-3
1027	GO_Biological_Process_2023__Regulation Of Rac Protein Signal Transduction (GO:0035020)	-0.489388	-1.88072	0.00511945	0.0586441	1	9/15	28.87%	PIK3CG;ARHGAP24;SH3BP1;GABARAP;CADM4;ARF6;KBTBD6;KBTBD7;STMN3	L3-5IT-3
1028	GO_Cellular_Component_2023__U2-type Precatalytic Spliceosome (GO:0071005)	-0.327285	-1.88052	0.0015674	0.0584514	1	35/49	46.13%	SF3B5;LSM7;SNRPD2;RNF113A;SNU13;LSM4;LSM2;SNRPB;SNRPE;LSM3;ZMAT2;SF3B4;SNRPB2;SF3A2;IK;SF3B2;PRPF31;PHF5A;SNRPD3;RBMX2;SART1;SNRPG;DHX16;SF3A1;PRPF8;SNRPD1;SNRPA1;PRPF4;TXNL4A;SNIP1;WBP4;PRPF6;SNRNP200;MFAP1;LSM5	L3-5IT-3
1029	GO_Biological_Process_2023__Gluconeogenesis (GO:0006094)	-0.40145	-1.87734	0.00816993	0.059848	1	16/27	29.52%	KRT17;TPI1;SLC25A10;ENO3;SLC25A1;PGAM1;PCK2;ENO2;PER2;SLC37A4;FBP1;MDH2;ENO1;MDH1;PGK1;G6PC3	L3-5IT-3
1030	GO_Biological_Process_2023__Protein Stabilization (GO:0050821)	-0.234431	-1.87203	0	0.0620231	1	112/189	45.18%	TYROBP;GAPDH;PYHIN1;RPS7;IRGM;SOX4;CALR;PFN1;TMEM88;RASSF2;DNLZ;PFDN6;STUB1;IGF1;TNIP2;PFN2;MT3;HSP90AB1;HSPA1A;PRKCD;NOP53;RPL11;HIP1;HSP90AA1;BAG1;PIH1D1;PHB1;ATP1B2;WNT10B;PDCL3;PPIB;CRYAB;PHB2;PINK1;SWSAP1;GRN;PARK7;PIM2;CLU;CCT7;PFDN2;PDRG1;VBP1;TBL1X;WFS1;RPL17;RPL5;FLNA;USP27X;CCT5;PIN1;MUL1;ATP1B1;USP19;TESC;RUVBL2;COA8;TCP1;TELO2;PIH1D2;UXT;CCT6A;CHEK2;TAF9B;SYVN1;BAG6;POLR2E;FLOT1;DVL1;…	L3-5IT-3
1031	GO_Biological_Process_2023__mRNA Processing (GO:0006397)	-0.230031	-1.87109	0	0.0621764	1	196/205	72.18%	RAMAC;HSPA8;GEMIN7;ALYREF;SF3B5;LSM7;SNRPD2;RBM42;RNF113A;SNU13;LSM4;U2AF1L4;MBLAC1;LSM2;NUDT21;HTATSF1;SNRPB;DDX39A;BUD31;SNRPE;ESS2;LSM3;SF3B6;SRSF8;ZMAT2;SF3B4;GEMIN6;DDX41;SRSF2;XAB2;HNRNPA1;TBRG4;SNRPA;HEXIM1;PIN1;HNRNPK;WDR83;GPKOW;SNRPB2;EIF4A3;SNRPN;SF3A2;SRSF3;BCAS2;IK;SF3B2;PRPF31;PHF5A;CWC15;RBM8A;HNRNPA0;DDX23;RBM4B;SNRPD3;SRSF7;SYF2;RBMX2;FRG1;SYNCRIP;NCBP2;METTL3;DHX38;SART1;PRKACA;…	L3-5IT-3
1032	GO_Biological_Process_2023__Cilium Movement (GO:0003341)	0.277839	1.86925	0.0026738	0.119333	0.999	28/56	25.98%	TEKT5;TTLL8;TEKT1;CFAP206;TTC29;DNAH11;DNAI2;RSPH6A;RSPH9;ODAD1;CFAP53;DNAH17;DNAI3;RSPH4A;DNAI1;ROPN1L;CCDC39;CFAP54;CFAP100;DNAAF1;TEKT3;ODAD4;DNAH9;CFAP70;HYDIN;GAS8;CCDC40;TTLL3	L3-5IT-3
1033	GO_Biological_Process_2023__Positive Regulation Of T Cell Proliferation (GO:0042102)	-0.332378	-1.86922	0.00309598	0.062818	1	20/47	18.21%	AIF1;CD86;PYCARD;SYK;HLA-DPA1;PTPRC;ANXA1;CD70;IL23A;IL18;IGF1;CD24;HHLA2;TNFSF9;IL15;TMIGD2;LEP;IL12RB1;TNFRSF13C;ICOSLG	L3-5IT-3
1034	GO_Biological_Process_2023__Platelet Aggregation (GO:0070527)	-0.381983	-1.86908	0.00983607	0.0625834	1	18/31	30.06%	PIK3CG;HBB;PDGFRA;P2RY12;PPIA;MYL12A;ITGB3;FIBP;FGL1;PLEK;ACTG1;CSRP1;CLIC1;MYL9;GNAS;FLNA;ILK;UBASH3B	L3-5IT-3
1035	WikiPathway_2023_Human__Eicosanoid Metabolism Via Lipooxygenases LOX WP4721	0.371472	1.86814	0.00797872	0.118646	0.999	11/26	13.84%	CYP4F2;HPGD;ALOX5;ALOX15;DPEP1;FPR2;LTC4S;CYP4A22;ACOX2;CYP4A11;LTB4R	L3-5IT-3
1036	GO_Biological_Process_2023__Adenylate Cyclase-Modulating G Protein-Coupled Receptor Signaling Pathway (GO:0007188)	-0.258437	-1.86589	0	0.063712	1	42/125	15.62%	ADRA1D;GPR26;CALCR;GNAT3;RGS1;LPAR1;PTHLH;GPR171;CORT;OPRK1;VIPR2;ADM5;ADCY4;TBXA2R;DRD5;CCR3;VIP;ADRA2A;ADGRF5;ADGRG6;P2RY12;GIPR;ADORA2B;ADCYAP1;GPR37;RAMP2;GPR3;PTGFR;INSL3;ADGRE5;GALR3;GPR37L1;GIP;ADGRE3;TCP11;GNA15;ADGRL4;GPR65;OPRL1;MCHR1;GPHB5;CRHR1	L3-5IT-3
1037	WikiPathway_2023_Human__Cholesterol Synthesis Disorders WP5193	-0.474108	-1.86503	0.00690846	0.0638386	1	14/17	37.79%	EBP;IDI1;HMGCS1;DHCR24;PMVK;SQLE;MSMO1;DHCR7;FDPS;MVK;HMGCR;SC5D;FDFT1;MVD	L3-5IT-3
1038	GO_Biological_Process_2023__Epithelial Cell Differentiation (GO:0030855)	-0.272463	-1.86301	0.00302115	0.0644235	1	33/87	18.29%	CRYGD;DHRS9;KRT31;FGFR2;MAF;MESP1;DNPH1;KRT17;TBX1;PROX1;ANXA1;ZNF703;PTER;EDF1;TST;ALDOC;SPINK5;SCUBE1;OVOL3;PLAAT3;KRT10;TAGLN2;PCK2;ASCL1;BDH2;VEGFA;HDAC1;UPK1B;PIH1D1;DAB2;GRHL2;ACTL8;PCNA	L3-5IT-3
1039	WikiPathway_2023_Human__Hematopoietic Stem Cell Differentiation WP2849	-0.339309	-1.86214	0.00313972	0.0645609	1	17/42	14.28%	IKZF1;FLI1;LYL1;NOTCH1;NFATC2;STAT5A;FOSB;LEF1;MYB;CD34;TRAF3IP3;FOS;ITGB3;VAV1;GYPA;LMO2;IRF5	L3-5IT-3
1040	WikiPathway_2023_Human__Amplification And Expansion Of Oncogenic Pathways As Metastatic Traits WP3678	-0.470671	-1.86108	0.00519031	0.064743	1	9/16	15.70%	PIK3CG;TNC;POSTN;NOTCH1;CYTIP;LEF1;VEGFA;EPAS1;TCF7L1	L3-5IT-3
1041	GO_Biological_Process_2023__Establishment Of Skin Barrier (GO:0061436)	0.429485	1.86057	0.00724638	0.122662	0.999	10/17	17.75%	CLDN1;KDF1;HRNR;FLG2;TP63;ALOX12B;TMEM79;ALOXE3;CLDN4;LSR	L3-5IT-3
1042	GO_Cellular_Component_2023__Precatalytic Spliceosome (GO:0071011)	-0.322552	-1.86032	0.00160772	0.0647401	1	36/51	46.13%	SF3B5;LSM7;SNRPD2;RNF113A;SNU13;LSM4;LSM2;SNRPB;SNRPE;LSM3;SF3B6;ZMAT2;SF3B4;SNRPB2;SF3A2;IK;SF3B2;PRPF31;PHF5A;SNRPD3;RBMX2;SART1;SNRPG;DHX16;SF3A1;PRPF8;SNRPD1;SNRPA1;PRPF4;TXNL4A;SNIP1;WBP4;PRPF6;SNRNP200;MFAP1;LSM5	L3-5IT-3
1043	GO_Biological_Process_2023__Response To Copper Ion (GO:0046688)	0.454561	1.85951	0.00952381	0.121785	0.999	7/15	7.94%	MT1X;AQP1;MT1E;MT1G;MT1M;MT2A;MT1F	L3-5IT-3
1044	GO_Biological_Process_2023__Regulation Of Insulin-Like Growth Factor Receptor Signaling Pathway (GO:0043567)	0.456569	1.85897	0.0091954	0.120712	0.999	9/15	17.14%	CILP;NKX3-1;BMP5;GHRHR;IGFBP5;IGFBP3;IGFBP2;CDH3;INPPL1	L3-5IT-3
1045	GO_Molecular_Function_2023__Serine-Type Endopeptidase Inhibitor Activity (GO:0004867)	0.351027	1.8588	0.00481928	0.119324	0.999	16/32	20.87%	SERPINE1;TFPI;SERPINC1;AMBP;SERPINA10;SERPINH1;SERPINF2;ANXA2;SERPIND1;SERPINE3;SERPINB1;SERPINB6;SERPINB8;SPINK9;SERPING1;MANSC4	L3-5IT-3
1046	WikiPathway_2023_Human__Dravet Syndrome WP5200	-0.398213	-1.85569	0.00796178	0.0656528	1	27/27	60.25%	PRR5L;SCN1B;CALM1;PRKCA;PRR5;SCN2B;MLST8;MAPK11;SCN3B;SCN4B;AKT1;KCNA2;FGF13;PCDH19;CAMK2A;STXBP1;NFKB1;MAPKAP1;SCN2A;SCN8A;RICTOR;SCN3A;CHD2;MTOR;HCN1;PIK3CA;SCN1A	L3-5IT-3
1047	KEGG_2021_Human__Proteasome	-0.340269	-1.85502	0.00472441	0.0657004	1	35/44	50.84%	PSMB6;PSMB10;PSMC3;PSMC5;PSMD8;PSMB9;PSME1;PSME2;ADRM1;PSMA8;PSMA7;PSMB4;PSMB5;PSMB3;PSMD7;PSMA4;PSMD2;PSMC4;PSMD3;POMP;PSMC1;PSMD4;PSME4;PSMD6;PSMA3;PSME3;PSMB1;PSMA5;PSMB2;PSMC2;PSMD12;PSMD13;PSMB7;PSMC6;PSMA1	L3-5IT-3
1048	KEGG_2021_Human__Synaptic vesicle cycle	-0.293581	-1.85379	0.00618238	0.0659554	1	47/68	46.90%	SLC6A5;ATP6V0C;SLC17A6;ATP6V1F;SLC6A12;RAB3A;SLC32A1;AP2M1;ATP6V0B;SLC18A2;SLC6A1;ATP6V0D2;ATP6V1G2;VAMP2;AP2S1;SLC17A8;ATP6V1G1;SLC6A4;STX1A;SLC1A2;SLC17A7;ATP6V1C2;ATP6V1D;ATP6V0D1;ATP6V0E2;STX1B;SLC6A9;ATP6V1E1;CPLX1;SLC1A6;CPLX2;CLTB;CLTA;ATP6V1B2;NAPA;SLC6A7;DNM1;UNC13A;SNAP25;SLC1A1;AP2A1;ATP6V1A;ATP6V1E2;ATP6V1C1;NSF;CLTC;AP2A2	L3-5IT-3
1049	WikiPathway_2023_Human__Heart Development WP1591	-0.378979	-1.85337	0.00674536	0.0655563	1	12/30	14.77%	TBX20;HEY2;NOTCH1;TBX1;NFATC4;NFATC2;FGF8;HEY1;SHH;ERBB3;GATA4;VEGFA	L3-5IT-3
1050	MSigDB_Hallmark_2020__Complement	-0.236471	-1.85315	0	0.0654131	1	93/172	37.25%	PRSS36;PIK3CG;DUSP6;CASP4;CA2;PIK3R5;LCP2;CASP1;GNGT2;C3;F7;CASP10;C1QC;C4BPB;PFN1;MSRB1;CDA;DOCK10;RHOG;APOC1;ITGAM;FCER1G;CPM;ANXA5;TIMP1;MMP15;PRSS3;OLR1;LCK;LYN;MT3;HSPA5;PLEK;CALM3;HSPA1A;PRKCD;CTSD;CALM1;PSMB9;PLAT;FCN1;NOTCH4;S100A13;CD55;MAFF;SERPINB2;CSRP1;SCG3;C1R;CDH13;CASP7;RCE1;F10;STX4;CEBPB;CDK5R1;GMFB;KYNU;CLU;DUSP5;EHD1;ERAP2;GNB4;CTSL;SIRT6;CTSO;L3MBTL4;TIMP2;GNB2;ATOX1;HPCAL4;I…	L3-5IT-3
1051	GO_Cellular_Component_2023__Cornified Envelope (GO:0001533)	0.412509	1.85175	0.00502513	0.122712	1	10/19	16.15%	DSP;TCHH;DSC1;HRNR;FLG2;DSG2;PKP2;TGM1;JUP;DSC2	L3-5IT-3
1052	GO_Biological_Process_2023__Positive Regulation Of Cytokine Production (GO:0001819)	-0.219766	-1.85162	0	0.0657231	1	79/252	16.90%	AIF1;CD86;GARIN5A;PIK3CG;PYCARD;SYK;HLA-DPA1;SPHK1;PTPRC;TYROBP;LAPTM5;TLR7;CASP1;ANXA1;LILRB1;C3;EREG;GAPDH;CD244;TLR4;LTB;ELANE;RGCC;IL23A;ADRA2A;TRAF3IP3;C1QTNF4;IL18;HTR2B;HYAL2;DDIT3;TLR3;EGR1;NODAL;LILRA2;FCER1G;CYP1B1;CHI3L1;CD14;CLEC7A;SIGLEC16;NLRP9;MDK;HHLA2;CSF1R;LCP1;STOML2;ALOX15B;SULF1;GATA4;HSPA1A;INAVA;IL15;LACC1;TMIGD2;FZD5;ATF4;CYBA;ISG15;LEP;HLA-A;SOD1;IRF5;CD74;FCN1;IL12RB1;LA…	L3-5IT-3
1053	GO_Biological_Process_2023__Negative Regulation Of Cell Projection Organization (GO:0031345)	-0.320757	-1.84831	0.0046875	0.0670605	1	28/49	38.14%	LPAR1;DCC;CIB1;YWHAH;WNT3A;KANK1;MT3;MAG;APOE;TSKU;PRAG1;ITM2C;FKBP4;MINAR1;PTPRO;ZNF365;RTN4R;MYLIP;PRNP;RTN4RL2;SPRY2;STMN2;STX1B;PTPRS;BAG5;RAB29;GORASP1;RTN4RL1	L3-5IT-3
1054	GO_Biological_Process_2023__Regulation Of Cell Development (GO:0060284)	-0.329744	-1.84533	0.00632911	0.0683522	1	24/45	32.81%	CX3CR1;HEY2;HES5;SLAMF8;HES1;LEF1;HEYL;HEY1;S100A10;HES2;ASCL1;RPS19;PTN;GFI1B;PER2;GRN;HES6;HMGB2;BHLHE41;HDAC9;CX3CL1;BRPF1;BHLHE40;AKT1	L3-5IT-3
1055	GO_Biological_Process_2023__Positive Regulation Of Inflammatory Response (GO:0050729)	-0.29066	-1.83891	0.00305344	0.0716119	1	32/74	21.97%	GSDMD;PYCARD;LGALS1;CASP4;TLR7;CASP1;ETS1;TLR4;IL23A;DDT;IL18;HYAL2;TLR3;IGF2BP1;CREB3L3;NLRC4;MDK;CD81;LCP1;NLRP1;IL15;GPRC5B;NINJ1;RPS19;TNFRSF1A;NLRP10;WNT5A;TRADD;GRN;CAMK2N1;CEBPA;AIM2	L3-5IT-3
1056	WikiPathway_2023_Human__Cholesterol Metabolism WP5304	-0.29942	-1.83657	0.00313972	0.0719241	1	40/63	38.27%	ANGPTL3;ABCB11;ANGPTL8;TSPO;LCAT;APOC1;TM7SF2;LIPG;LIPC;EBP;STAR;CYP27A1;APOE;IDI1;LDLR;APOB;NPC2;MTTP;HMGCS1;DHCR24;PLTP;MYLIP;PMVK;VDAC1;SQLE;MSMO1;NSDHL;DHCR7;DGAT1;FDPS;ACAT2;CD36;MVK;HSD17B7;HMGCR;SC5D;SLC27A4;FDFT1;MVD;LRPAP1	L3-5IT-3
1057	GO_Biological_Process_2023__Positive Regulation Of Extracellular Matrix Organization (GO:1903055)	0.439141	1.83567	0.00496278	0.127173	1	9/17	17.70%	PDPN;EMILIN1;SMAD3;RUNX1;DDR2;EFEMP2;TNXB;MELTF;TGFB1	L3-5IT-3
1058	GO_Biological_Process_2023__Positive Regulation Of Extrinsic Apoptotic Signaling Pathway (GO:2001238)	-0.383862	-1.83169	0.00854701	0.0743808	1	11/28	11.25%	G0S2;PYCARD;TNFRSF12A;TNFSF10;TLR4;LTB;SFRP1;HYAL2;LTBR;TNFSF12;HTRA2	L3-5IT-3
1059	GO_Biological_Process_2023__Oligosaccharide Biosynthetic Process (GO:0009312)	0.395536	1.82836	0.00697674	0.128534	1	10/20	21.21%	FUT3;B4GALNT2;FUT6;B3GALT5;ST6GALNAC1;FUT1;B4GALT1;FUT4;FUT2;ST3GAL4	L3-5IT-3
1060	GO_Biological_Process_2023__Cellular Response To Oxidative Stress (GO:0034599)	-0.253491	-1.82824	0.00436681	0.0761173	1	45/112	28.57%	CRYGD;AIF1;UCP1;EGFR;ZFP36L2;ROMO1;PRDX5;CHCHD2;PDGFRA;DHRS2;GPX1;FOXO1;PRDX2;FOS;PPIA;ANKRD2;PRR5L;MPV17L2;HTRA2;MT3;PYCR2;VRK2;PYCR1;HSPA1A;PRKCD;ATF4;ETV5;JUN;PEX12;PEX10;PINK1;ALDH3B1;SELENOS;PARK7;STX4;PDK2;PRDX3;PRKD1;PARP1;GPX7;NUDT2;NQO1;G6PD;RPS3;MAPK3	L3-5IT-3
1061	KEGG_2021_Human__Linoleic acid metabolism	0.401912	1.82539	0.00954654	0.129509	1	7/18	5.94%	PLA2G10;ALOX15;PLA2G4A;CYP3A4;PLA2G4D;PLA2G12B;JMJD7-PLA2G4B	L3-5IT-3
1062	GO_Biological_Process_2023__Positive Regulation Of Interleukin-8 Production (GO:0032757)	-0.328731	-1.82315	0.0046875	0.0779653	1	19/46	15.71%	PYCARD;SYK;TLR7;CD244;TLR4;ELANE;HYAL2;DDIT3;TLR3;LILRA2;CHI3L1;CD14;CLEC7A;HSPA1A;LEP;CD74;FCN1;LAMTOR5;NLRP10	L3-5IT-3
1063	GO_Biological_Process_2023__Blood Vessel Morphogenesis (GO:0048514)	-0.332545	-1.82293	0.00656814	0.0777721	1	14/43	8.97%	HAS2;TGFBR2;TBX20;ANGPTL3;HEY2;SYK;TBX1;PROX1;STRA6;HES1;FLT1;SHH;CYP1B1;RAMP2	L3-5IT-3
1064	KEGG_2021_Human__Starch and sucrose metabolism	0.348525	1.82258	0.00740741	0.130293	1	17/29	28.86%	SI;TREH;MGAM;GBA3;HK3;PYGL;MGAM2;GYG2;HKDC1;ENPP1;ENPP3;GYS1;AMY2B;PGM2;GAA;PYGB;GANC	L3-5IT-3
1065	KEGG_2021_Human__Staphylococcus aureus infection	0.31466	1.82085	0.00251889	0.130298	1	18/42	12.11%	HLA-DOB;HLA-DQA1;HLA-DRB5;ICAM1;HLA-DMB;CFH;C1QA;SELPLG;C5AR1;HLA-DQB1;FPR2;CFD;PLG;FPR1;FCAR;SELP;HLA-DMA;FPR3	L3-5IT-3
1066	GO_Biological_Process_2023__Positive Regulation Of Defense Response (GO:0031349)	-0.266223	-1.82061	0.00440529	0.0781984	1	38/95	21.97%	GSDMD;PYCARD;LGALS1;CASP4;GRP;TLR7;CASP1;ETS1;EREG;IRGM;TLR4;IL23A;TRIM56;DDT;TASL;IL18;HYAL2;TLR3;IGF2BP1;SIGLEC16;NLRC4;MDK;LCP1;NLRP1;IL15;GPRC5B;CYBA;NINJ1;TNFRSF1A;RNF31;NLRP10;WNT5A;GRPR;TRADD;GRN;CAMK2N1;CEBPA;AIM2	L3-5IT-3
1067	WikiPathway_2023_Human__Spinal Cord Injury WP2431	0.242017	1.82048	0	0.129169	1	35/97	17.85%	ROS1;CXCL8;CSPG4;NGFR;ACAN;PDYN;LGALS3;ICAM1;CDK2;MYC;NOX4;SEMA6A;ZFP36;GJA1;GFAP;AQP1;CDK1;SLIT3;CCL2;SLIT2;TACR1;LILRB3;AQP4;SELP;CHST11;NOS2;COL4A1;LTB4R;TP53;PTGS2;NTN1;SOX9;BTG2;TGFB1;IL1R1	L3-5IT-3
1068	KEGG_2021_Human__Spliceosome	-0.246317	-1.81861	0.00151515	0.0789043	1	89/129	51.82%	HSPA8;HSPA1L;ALYREF;SF3B5;LSM7;HSPA1A;SNRPD2;HSPA2;PCBP1;SNU13;LSM4;PUF60;U2AF1L4;LSM2;SNRPB;PQBP1;BUD31;SNRPE;LSM3;SF3B6;SRSF8;ZMAT2;SF3B4;SRSF2;XAB2;HNRNPA1;SNRPA;HNRNPK;SNRPB2;THOC3;EIF4A3;RBMXL1;SF3A2;SRSF3;BCAS2;CHERP;SF3B2;PRPF31;PHF5A;CWC15;RBM8A;DDX23;SNRPD3;SRSF7;SYF2;NCBP2;WBP11;DHX38;SART1;SNRPG;MAGOH;SLU7;SNRNP27;DHX16;SRSF9;RBM22;SF3A1;CCDC12;SNRPC;HNRNPA3;PRPF19;PRPF8;SRSF5;SNRPD1;R…	L3-5IT-3
1069	GO_Biological_Process_2023__Positive Regulation Of Epithelial Cell Proliferation (GO:0050679)	-0.257918	-1.81627	0	0.0797981	1	56/103	33.42%	FGFR2;JAML;SOX11;EGFR;NR4A3;TBX1;NME2;PROX1;STAT5A;NME1;PLXNB3;ZNF703;VIP;SFRP1;SEMA5A;HTR2B;NODAL;EGR3;IGF1;HRAS;ITGB3;MDK;TNFSF12;TEK;PTN;VEGFA;FGF2;WNT5A;PRKCA;PDCL3;HPN;CDH13;BMP2;GRN;ECM1;NRARP;FGF7;HYAL1;HMGB2;ZNF580;PAX2;NR4A1;EGFL7;XBP1;PRKD1;MEN1;VEGFB;LAMB1;PRKD2;BAD;MYDGF;EMC10;RTN4;ZNF304;AKT1;PDCD6	L3-5IT-3
1070	WikiPathway_2023_Human__Neural Crest Differentiation WP2064	-0.278758	-1.81613	0	0.0795257	1	28/77	18.10%	OLIG2;FGFR2;ZIC1;HEY2;GJB1;HES5;NOTCH1;ETS1;HES1;PRTG;MITF;MYB;FGF8;CDH1;DLL3;OLIG1;WNT3A;ASCL1;SOX10;PMP22;HDAC1;NOTCH4;TCF7L1;FGF2;BMP7;RHOB;NOTCH3;COL11A2	L3-5IT-3
1071	GO_Biological_Process_2023__Positive Regulation Of ERK1 And ERK2 Cascade (GO:0070374)	-0.240874	-1.81252	0	0.0806913	1	49/134	19.67%	ADRA1D;CALCR;P2RY1;FGFR2;PYCARD;MUSK;NPNT;EGFR;NOTCH1;PTPRC;FFAR4;CIB1;GLIPR2;PDGFRA;DDT;PLA2G5;HTR2B;PDGFD;FGF1;NODAL;CCN2;P2RY6;ADCYAP1;NECAB2;HLA-DRB1;CHI3L1;IGF1;HRAS;GPNMB;HTR2C;TEK;CSF1R;ACKR3;MT3;GCNT2;GATA4;DDR1;APOE;CD74;ALKAL2;FGF2;PHB1;PRKCA;PHB2;CD4;ANGPT1;GPER1;GAREM1;BMP2	L3-5IT-3
1072	GO_Biological_Process_2023__Regulation Of Neuron Apoptotic Process (GO:0043523)	-0.268763	-1.81202	0.00452489	0.0806405	1	45/89	33.28%	CLCF1;TOX3;NGF;NDNF;NFATC4;SEMA3E;CDK5;UBB;UNC5B;DKK1;DDIT3;EGR1;SET;ERBB3;BDNF;MDK;MT3;MAG;ATF4;APOE;SOD1;FGF20;GPRASP3;PINK1;SIGMAR1;GRN;PARK7;CDK5R1;TGFB3;BAX;CLU;PRNP;PTPRZ1;WFS1;AKT1S1;VSTM2L;CRLF1;FAIM2;NRBP2;GRID2;PRKCG;NSMF;IL6ST;BCL2;AGAP2	L3-5IT-3
1073	GO_Biological_Process_2023__Heart Morphogenesis (GO:0003007)	-0.317742	-1.81039	0.00471698	0.0812852	1	23/49	24.94%	TBX3;TBX20;HEY2;MESP1;NOTCH1;TBX1;HES1;HEYL;FGF8;HEY1;HTR2B;DYNLL1;LEFTY1;ADAMTS5;CHD7;TBX19;VEGFA;OLFM1;MESP2;BMP2;ACVR1;ENG;FKBP1A	L3-5IT-3
1074	GO_Biological_Process_2023__Positive Regulation Of Chemotaxis (GO:0050921)	-0.356241	-1.80932	0.00658979	0.0816793	1	16/34	20.86%	AIF1;MET;F7;RARRES2;SEMA5A;TMSB4X;P2RY12;SMOC2;MDK;PTN;VEGFA;IL6R;FGF2;CDH13;STX4;ZNF580	L3-5IT-3
1075	MSigDB_Hallmark_2020__KRAS Signaling Up	-0.232078	-1.80795	0.00142045	0.0821181	1	64/171	23.39%	IRF8;G0S2;IKZF1;ADAMDEC1;TRIB1;NGF;DUSP6;TNFRSF1B;CIDEA;RGS16;CA2;DOCK2;LAPTM5;SPON1;ETS1;RELN;PCP4;EREG;CD37;MAFB;PRRX1;ETV1;SEMA3B;ITGA2;IL7R;RBP4;ANO1;FCER1G;GPNMB;PCSK1N;TMEM158;TRIB2;C3AR1;LCP1;PLVAP;HSD11B1;SCN1B;SPP1;ADGRL4;GADD45G;TSPAN7;GPRC5B;PLAT;MYCN;ETV5;GNG11;YRDC;NAP1L2;CBX8;ALDH1A3;SCG3;IL10RA;BIRC3;BMP2;ABCB1;ID2;PDCD1LG2;PPP1R15A;SCG5;VWA5A;NRP1;MMD;ARG1;ENG	L3-5IT-3
1076	GO_Biological_Process_2023__mRNA Splicing, Via Spliceosome (GO:0000398)	-0.219769	-1.80706	0	0.0823057	1	194/204	72.18%	HSPA8;GEMIN7;SF3B5;LSM7;TSSC4;SNRPD2;RBM42;SCNM1;RNF113A;SNU13;LSM4;PUF60;U2AF1L4;LSM2;HTATSF1;SNRPB;PQBP1;DDX39A;BUD31;SNRPE;ESS2;LSM3;SF3B6;SRSF8;ZMAT2;SF3B4;GEMIN6;DDX41;GEMIN4;SRSF2;XAB2;HNRNPA1;SNRPA;PIN1;HNRNPK;WDR83;GPKOW;SNRPB2;EIF4A3;SNRPN;SF3A2;SRSF3;BCAS2;IK;SF3B2;PRMT5;PRPF31;PHF5A;CWC15;RBM8A;DDX23;RBM4B;SNRPD3;SRSF7;SYF2;RBMX2;FRG1;SYNCRIP;NCBP2;METTL3;DHX38;STRAP;SART1;SNRPG;MAGOH;…	L3-5IT-3
1077	GO_Biological_Process_2023__Visual Perception (GO:0007601)	0.247627	1.8056	0.00290698	0.135987	1	31/81	19.33%	RS1;FSCN2;CABP4;CRYBA1;ROM1;CRYBG3;ARR3;CRYGA;GUCY2F;GNAT2;CNGB1;EFEMP1;CRYGB;DHRS3;CRYBB2;MYO7A;VAX2;TULP2;NXNL2;RDH10;PRR4;COL18A1;ADGRV1;CRYZ;AOC2;CRYBB3;PDE6C;PRPH2;GPR179;GUCA1B;CACNA2D4	L3-5IT-3
1078	WikiPathway_2023_Human__Complement System WP2806	0.251671	1.80533	0.00268097	0.134756	1	31/73	19.87%	F11;TLR2;SFTPA1;CD40;ICAM1;CFH;CR2;CR1;SFTPA2;C6;SELPLG;SELE;C5AR1;C5AR2;SELL;CFD;CFP;PLG;FPR1;VTN;FCER2;PLAUR;SELP;ITGA2B;THBS1;APOA1;WAS;F13A1;LAMA5;SERPING1;C2	L3-5IT-3
1079	WikiPathway_2023_Human__Network Map Of SARS CoV 2 Signaling Pathway WP5115	0.209647	1.80394	0	0.130416	1	52/160	17.20%	IGLL1;CXCL8;IL12A;HRG;CXCL16;SERPINE1;MMP25;IL33;HLA-DRB5;FAM83A;CD163;IFI44L;SERPINA10;GTSE1;CFH;IRF9;APOL1;CCL22;CDK1;BTN3A1;LBP;ITIH3;CCL2;NTRK1;CD8B;IL5;CFP;CCNB2;TPO;CXCL13;IFI6;OAS2;TP53I3;IGFBP3;GP1BA;NLRP3;PTPN6;SELP;ZAP70;SKAP1;COL7A1;RIGI;IFIH1;CCL5;APOA1;APOH;PTGS2;IFITM3;AGT;EIF4EBP1;ITIH4;IL16	L3-5IT-3
1080	GO_Cellular_Component_2023__Vacuolar Membrane (GO:0005774)	-0.308173	-1.80333	0.00963082	0.0835206	1	28/53	31.99%	CHMP2A;IRGM;MAP1LC3A;ATP6V1F;WDR24;GABARAPL2;RUBCNL;ATP6V0D2;ATP6V1G2;CCDC115;TMEM199;ATP6AP2;ATP6V1G1;GABARAP;GABARAPL1;MAP1LC3B;NPRL2;PRKD1;VPS4A;CHMP4A;ATG9A;ATP6V0D1;CHMP3;TEX264;CHMP5;CHMP1A;WDR81;CHMP1B	L3-5IT-3
1081	GO_Molecular_Function_2023__GTPase Activity (GO:0003924)	-0.214038	-1.80304	0.00133869	0.0833575	1	139/255	42.44%	GIMAP7;RGS18;GNG3;GNAT3;RGS1;ARHGDIB;RGS16;RGS10;RHOJ;GNGT2;GBP6;RERG;RGS8;GEM;RRAS;IRGM;GNG10;GBP1;RAB13;SEPTIN12;RAB3A;RGS4;RND3;RHOG;RASL10A;RRAGA;SEPTIN10;RAB3B;HRAS;RASL12;RAN;TMEM250;ARL2;TUBA1B;SEPTIN5;RHOV;RAB42;RAC3;GNA15;RGS19;SEPTIN14;DIRAS1;EEF1A2;NUGGC;RHOU;RAB5C;NLRP10;GNG11;RAB33A;RND2;RHOB;RGS14;GBP7;GSPT2;RHOC;RAB20;GBP4;EEF2;RAB6D;RRAGC;RHEBL1;RAB11B;TBCC;RAC1;RASD2;GNAL;RAB31;R…	L3-5IT-3
1082	WikiPathway_2023_Human__Pathogenic Escherichia Coli Infection WP2272	-0.314505	-1.8017	0.00324675	0.0840177	1	31/52	35.42%	KRT18;TUBB2A;TUBB1;TUBA4A;TLR4;CDH1;EZR;ARPC5L;CD14;TUBA1A;TUBB4B;TUBA1B;TUBB4A;HCLS1;ACTG1;PRKCA;TUBB;ARPC4;ACTB;NCL;ARPC3;ARPC1A;TUBB6;ARPC1B;TUBB2B;ARPC5;RHOA;YWHAZ;TUBB3;YWHAQ;ARHGEF2	L3-5IT-3
1083	GO_Biological_Process_2023__Positive Regulation Of Transmembrane Receptor Protein Serine/Threonine Kinase Signaling Pathway (GO:0090100)	0.243442	1.8004	0.00280112	0.132128	1	30/84	17.83%	INHBA;INHBB;BMP6;BMP4;BMP5;MSTN;TTK;CDKN2B;GDF6;GDF9;BMP8B;GDF10;GDF15;CDH5;BMP3;SCUBE3;GDF5;CCNA2;GDF7;THBS1;ZNF423;INHA;TNXB;BMP8A;FLCN;RBPMS;PPARG;TGFB2;TGFB1;GDF11	L3-5IT-3
1084	GO_Biological_Process_2023__Mitochondrial Transport (GO:0006839)	-0.307605	-1.79948	0.00156006	0.0850289	1	29/52	36.17%	SLC25A5;TSPO;TIMM10;TOMM22;TIMM8B;TIMM17B;BCS1L;TIMM13;TOMM7;AIP;HSP90AA1;FIS1;SLC25A4;TOMM20;PINK1;PPIF;BCAP31;SLC25A31;TIMM17A;BNIP3;DNAJC19;TOMM5;BAD;TOMM40;TOMM34;BCL2;TIMM44;KIFBP;OXA1L	L3-5IT-3
1085	GO_Biological_Process_2023__Negative Regulation Of Programmed Cell Death (GO:0043069)	-0.204584	-1.79785	0.00138504	0.0856096	1	116/332	25.21%	KRT18;MET;TBX3;TNFRSF10D;PRELID1;GPX4;SPHK1;EGFR;LAPTM5;AMIGO2;PRDX5;HIGD2A;PROC;NME2;BIRC5;ANXA1;FFAR4;CIB1;GSTP1;TRIAP1;LEF1;RPL10;DHRS2;VIP;RPS3A;GREM1;TNFAIP8;FOXO1;PRDX2;SFRP1;AXL;DKK1;TCIM;PTMS;HTR2B;BARD1;GHRL;SHH;IER3;SLC7A11;MECOM;MIEN1;NUAK2;EGR3;ANXA5;IGF1;EVI2B;PLK3;PSMC5;ERBB3;LTK;DDAH2;TEK;LRP2;CAT;CFL1;MT3;ALB;HSPA5;CD27;ATF5;HSPA1A;NTSR1;ASCL1;SOX8;CD74;VEGFA;HDAC1;ARHGDIA;PSMD10;…	L3-5IT-3
1086	GO_Biological_Process_2023__Negative Regulation Of Transposition (GO:0010529)	0.391448	1.79736	0.00729927	0.13337	1	11/20	20.36%	APOBEC3G;APOBEC3H;APOBEC3A;MOV10;TEX15;MYBL1;TDRD9;ZNF93;TDRD12;PIWIL2;DDX4	L3-5IT-3
1087	GO_Biological_Process_2023__Protein Insertion Into ER Membrane (GO:0045048)	-0.380915	-1.79733	0.01	0.085605	1	22/28	45.55%	EMC6;RAB5IF;TMEM147;EMC9;UBL4A;GET3;GET4;EMC4;EMC7;NOMO2;MMGT1;EMC10;TRAM1L1;SGTA;GET1;EMC8;CAMLG;NCLN;NOMO1;CCDC47;EMC2;EMC3	L3-5IT-3
1088	GO_Biological_Process_2023__RNA Splicing, Via Transesterification Reactions With Bulged Adenosine As Nucleophile (GO:0000377)	-0.227246	-1.7943	0	0.0867985	1	165/173	72.18%	HSPA8;GEMIN7;SF3B5;LSM7;SNRPD2;RBM42;RNF113A;SNU13;LSM4;U2AF1L4;LSM2;HTATSF1;SNRPB;DDX39A;BUD31;SNRPE;ESS2;LSM3;SF3B6;SRSF8;ZMAT2;SF3B4;GEMIN6;DDX41;SRSF2;XAB2;HNRNPA1;SNRPA;PIN1;HNRNPK;WDR83;GPKOW;SNRPB2;EIF4A3;SNRPN;SF3A2;SRSF3;BCAS2;IK;SF3B2;PRPF31;PHF5A;CWC15;RBM8A;DDX23;RBM4B;SNRPD3;SRSF7;SYF2;RBMX2;FRG1;SYNCRIP;NCBP2;METTL3;DHX38;SART1;SNRPG;MAGOH;SLU7;SNRNP27;DHX16;SRSF9;RBM22;SF3A1;HNRNPA…	L3-5IT-3
1089	GO_Molecular_Function_2023__Transmembrane Receptor Protein Tyrosine Kinase Activity (GO:0004714)	0.292862	1.7935	0.00542005	0.13397	1	20/48	18.13%	ROS1;KIT;KDR;EPHA1;EPHB4;FGFR4;ERBB4;ROR1;FLT3;EFEMP1;ROR2;FGFR3;NTRK1;FGFRL1;INSRR;RET;DDR2;MERTK;NTRK3;ERBB2	L3-5IT-3
1090	GO_Biological_Process_2023__Negative Regulation Of Interleukin-1 Production (GO:0032692)	-0.376843	-1.79163	0.00169779	0.0878243	1	14/27	18.20%	CX3CR1;PYDC1;CARD16;LILRB4;FFAR4;GSTP1;CD33;GHRL;ELF4;IGF1;FFAR1;CPTP;NLRP2B;CARD8	L3-5IT-3
1091	MSigDB_Hallmark_2020__KRAS Signaling Dn	0.210572	1.78846	0	0.135588	1	50/148	18.60%	HSD11B2;TFCP2L1;IRS4;YBX2;SCN10A;UPK3B;IFI44L;SLC12A3;LFNG;SERPINA10;MEFV;PAX3;WNT16;GPRC5C;CD80;MSH5;KLHDC8A;MYH7;SCGB1A1;TG;CHRNG;SLC5A5;SMPX;BRDT;ITIH3;FGFR3;IL5;TGM1;EGF;EDAR;COQ8A;NRIP2;GP1BA;ALOX12B;CALCB;CYP39A1;RIBC2;NPHS1;TEX15;KCNE2;IGFBP2;TGFB2;KCND1;RYR1;BTG2;TAS2R4;CLDN16;P2RX6;CNTFR;TENM2	L3-5IT-3
1092	GO_Molecular_Function_2023__G Protein-Coupled Peptide Receptor Activity (GO:0008528)	0.280442	1.78646	0.00767263	0.136042	1	22/52	15.30%	MC4R;CCKAR;CRHR2;PTH2R;NPR3;BDKRB2;GHRHR;NPSR1;FPR2;GPR151;EDNRB;MC1R;SCTR;GLP2R;UTS2R;FPR1;HCRTR2;GPR83;OXTR;FPR3;LTB4R;NPY1R	L3-5IT-3
1093	GO_Biological_Process_2023__Response To Type II Interferon (GO:0034341)	0.270498	1.78466	0.00524934	0.13619	1	20/53	15.17%	GBP5;CXCL16;TLR2;CD40;MEFV;IL23R;CCL25;CD58;DAPK1;SP100;CCL22;IFITM2;CCL2;LGALS9;AQP4;GBP2;SLC11A1;CCL5;CIITA;IFITM3	L3-5IT-3
1094	GO_Biological_Process_2023__Heart Development (GO:0007507)	-0.23972	-1.78391	0.00449775	0.0926481	1	53/138	24.16%	TGFBR2;TBX3;MESP1;APLN;SALL1;NOTCH1;TBX1;SGCZ;STRA6;SOX4;FGF8;MYL7;HTR2B;PDLIM3;CSRP3;BVES;SHH;DYNLL1;SCUBE1;RAMP2;DAND5;DNAAF4;EEF1AKMT4-ECE2;ERBB3;PCSK5;HEG1;LEFTY1;TEK;PDLIM4;GATA4;CHD7;TBX19;MYOCD;LDB3;GPC3;VEGFA;BMP7;GLI2;CASP8;PRMT1;MESP2;POPDC2;BMP2;ID2;BORCS8;PLCE1;CITED2;AKAP13;SGCD;PDLIM2;SH3PXD2B;PDLIM7;CACYBP	L3-5IT-3
1095	KEGG_2021_Human__Estrogen signaling pathway	-0.249705	-1.78266	0.00297177	0.0931757	1	49/108	32.81%	KRT31;KRT18;POMC;EGFR;KRT17;PGR;HSPA8;ADCY4;HSPA1L;SHC4;FOS;PLCB2;CREB3L3;HRAS;KRT10;CALM2;CALM3;CREB3L1;HSP90AB1;ITPR2;HSPA1A;PRKCD;CTSD;CALM1;HSPA2;ATF4;HSP90AA1;JUN;FKBP4;PIK3R3;CREB5;CREB3;GPER1;ADCY7;KRT15;GNAS;PIK3R2;SHC1;HSP90B1;HBEGF;CREB3L2;MAPK3;RARA;ATF6B;PLCB3;CREB3L4;KCNJ9;BCL2;AKT1	L3-5IT-3
1096	GO_Biological_Process_2023__Negative Regulation Of Epithelial Cell Apoptotic Process (GO:1904036)	0.338341	1.78161	0.00982801	0.137438	1	9/29	5.48%	KDR;SERPINE1;TNFAIP3;NEUROD1;ICAM1;PKHD1;IL11;YAP1;NUPR1	L3-5IT-3
1097	WikiPathway_2023_Human__LDL Influence On CD14 And TLR4 WP5272	-0.414743	-1.77731	0.00844595	0.0953472	1	13/20	32.81%	TLR4;RELB;CD14;CREB3L3;CREB3L1;ATF4;CREB5;CREB3;MAPK12;CREB3L2;MAPK11;CREB3L4;AKT1	L3-5IT-3
1098	GO_Molecular_Function_2023__Metalloendopeptidase Activity (GO:0004222)	-0.270452	-1.77462	0.00436681	0.0962616	1	23/81	11.22%	ADAMDEC1;KLK7;ADAM33;ADAMTS20;ADAMTS12;MMP23B;ADAM28;ADAMTS4;MMP19;ADAM7;MMP20;CLCA4;MME;ADAM12;ADAMTS6;MMEL1;ADAMTS18;EEF1AKMT4-ECE2;ADAMTS7;MMP15;ADAMTS1;ADAMTS5;CLCA1	L3-5IT-3
1099	WikiPathway_2023_Human__Myometrial Relaxation And Contraction Pathways WP289	-0.236913	-1.77217	0.00149701	0.0976493	1	75/143	37.08%	CRH;RGS18;GNG3;RGS1;LPAR1;RGS16;ACTA1;IGFBP6;RGS10;GNG12;ADCY4;ACTC1;GNG13;RGS4;FOS;YWHAH;IGFBP4;RAMP2;ACKR3;CALM2;CALM3;ATF5;RGS19;ITPR2;PRKCD;CALM1;ATP2A3;ACTG1;ATF4;CNN1;GNG4;JUN;CRHR1;GNG11;PRKCQ;MAFF;PRKCA;CREB3;RGS14;ACTB;RYR3;NOS1;ADCY7;YWHAB;ACTA2;GNAS;RGS3;RGS2;ATF3;ETS2;GNB4;GNG5;YWHAG;PRKD1;CRCP;GNB2;CACNB3;GSTO1;ATF6B;RGS5;PLCB3;PRKCG;PRKAR1A;GUCY1A1;YWHAZ;PDE4B;GNG7;YWHAQ;RXFP1;GRK5;…	L3-5IT-3
1100	MSigDB_Hallmark_2020__mTORC1 Signaling	-0.223274	-1.76689	0.00289017	0.100374	1	130/196	49.24%	SDF2L1;NIBAN1;ATP5MC1;FKBP2;EEF1E1;GAPDH;TPI1;TUBA4A;CD9;CALR;SLA;DDIT3;TM7SF2;HSPE1;ARPC5L;LDHA;SLC7A11;PPIA;HK2;FGL2;DAPP1;RRP9;HSPA5;EBP;DDIT4;MTHFD2;PIK3R3;SCD;RRM2;PRDX1;IDI1;LDLR;SLC37A4;PHGDH;ABCF2;PDAP1;NFKBIB;PSMB5;BUB1;SHMT2;HMGCS1;DHCR24;PPP1R15A;TUBG1;DDX39A;CORO1A;INSIG1;SQLE;MLLT11;FDXR;PSMA4;CACYBP;ENO1;ATP6V1D;XBP1;GOT1;VLDLR;TMEM97;DHCR7;PFKL;ALDOA;MCM4;HSP90B1;HMBS;SLC2A1;G6PD;P…	L3-5IT-3
1101	GO_Biological_Process_2023__Negative Regulation Of Cytokine Production (GO:0001818)	-0.234004	-1.76628	0	0.100418	1	37/147	10.21%	PYCARD;CIDEA;VSIG4;PTPRC;TYROBP;LAPTM5;IRAK3;LILRB4;ANXA1;FFAR4;CD84;LILRB1;SIGIRR;VSIR;LEF1;IRGM;TLR4;PSG4;GBP1;ELANE;HOMER3;RGCC;IL23A;AXL;EZR;CD34;SLC2A10;CD33;DDIT3;BANF1;TMSB4X;GHRL;ELF4;HLA-DRB1;XAF1;GPNMB;TRIB2	L3-5IT-3
1102	GO_Biological_Process_2023__Regulation Of Tumor Necrosis Factor Production (GO:0032680)	-0.256128	-1.76181	0.00605144	0.102592	1	27/100	9.32%	PYCARD;CX3CR1;SYK;POMC;CIDEA;PTPRC;TYROBP;IRAK3;LILRB4;CD84;LILRB1;GSTP1;VSIR;TLR4;IL23A;DDT;C1QTNF4;CD33;TLR3;GHRL;ELF4;LILRA2;TNFRSF8;CD14;IGF1;CLEC7A;OAS1	L3-5IT-3
1103	GO_Biological_Process_2023__Glucose Metabolic Process (GO:0006006)	-0.301892	-1.76111	0.00921659	0.102724	1	26/52	29.52%	KRT17;TPI1;GHRL;DCXR;HK2;OAS1;SLC25A10;ENO3;SLC25A1;PGAM1;PCK2;ATF4;ENO2;LRP5;PER2;SLC37A4;GCK;FBP1;MDH2;APOD;ENO1;G6PD;MDH1;KCNJ11;PGK1;G6PC3	L3-5IT-3
1104	KEGG_2021_Human__Arginine and proline metabolism	-0.306083	-1.75643	0.00320513	0.105064	1	24/47	28.19%	PRODH;CKM;CKB;CNDP1;ALDH1B1;PYCR3;CARNS1;PYCR2;PYCR1;CKMT2;P4HA3;GAMT;SRM;NOS1;ALDH4A1;DAO;SAT2;OAT;ARG1;AGMAT;GOT1;SMOX;CNDP2;ODC1	L3-5IT-3
1105	WikiPathway_2023_Human__Cardiac Progenitor Differentiation WP2406	-0.334163	-1.7559	0.00955414	0.105075	1	15/38	12.55%	TBX20;MESP1;THY1;NOTCH1;SOX1;ANPEP;PDGFRA;ACTC1;DKK1;NODAL;PAX6;IGF1;SOX2;WNT3A;GATA4	L3-5IT-3
1106	GO_Biological_Process_2023__Positive Regulation Of Response To External Stimulus (GO:0032103)	-0.24373	-1.75487	0.00145985	0.105224	1	45/118	21.13%	GSDMD;AIF1;PYCARD;LGALS1;CASP4;TLR7;CASP1;ETS1;EREG;IRGM;TLR4;RARRES2;IL23A;TRIM56;DDT;TASL;IL18;HYAL2;TLR3;P2RY12;LY86;IGF2BP1;SIGLEC16;NLRC4;MDK;LCP1;NLRP1;IL15;GPRC5B;CYBA;NINJ1;PLAT;TNFRSF1A;PTN;RNF31;NLRP10;SCARF1;WNT5A;PRKCA;TRADD;SASH1;GRN;STX4;CAMK2N1;CEBPA	L3-5IT-3
1107	GO_Biological_Process_2023__Regulation Of Protein Catabolic Process (GO:0042176)	-0.244819	-1.74645	0.00609756	0.109955	1	68/118	43.42%	EGFR;IRAK3;ASB5;NDUFA13;C4BPA;VIP;GPX1;UBB;FOXO1;C4BPB;EZR;BARD1;RILP;DNAAF4;TNFSF12;OAZ1;VPS28;ASB9;OAZ3;NUDT15;NKD1;APOE;MSN;HSP90AA1;GPC3;EEF1A2;PSME1;WNT5A;PHB1;DACT1;PSME2;TIPARP;PINK1;ATRAID;PLK2;GSK3A;FLNA;EEF1A1;PIN1;CTSA;NQO1;ODC1;MAD2L1;CHEK2;PRKCG;CDKN1B;FURIN;APC2;AGAP2;HMGCR;TMEM9;HGS;MAD2L2;NELL1;TRIM32;SNX12;PRKACA;PKD1;VPS11;OAZ2;RNF41;VPS35;PSME3;VCP;ATP13A2;SORL1;SNX3;AZIN1	L3-5IT-3
1108	GO_Molecular_Function_2023__Ribonucleoside Triphosphate Phosphatase Activity (GO:0017111)	-0.206985	-1.74641	0.0040107	0.109611	1	139/260	42.44%	GIMAP7;RGS18;GNG3;GNAT3;RGS1;ARHGDIB;RGS16;RGS10;RHOJ;GNGT2;GBP6;RERG;RGS8;GEM;RRAS;IRGM;GNG10;GBP1;RAB13;SEPTIN12;RAB3A;RGS4;RND3;RHOG;RASL10A;RRAGA;SEPTIN10;RAB3B;HRAS;RASL12;RAN;TMEM250;ARL2;TUBA1B;SEPTIN5;RHOV;RAB42;RAC3;GNA15;RGS19;SEPTIN14;DIRAS1;EEF1A2;NUGGC;RHOU;RAB5C;NLRP10;GNG11;RAB33A;RND2;RHOB;RGS14;GBP7;GSPT2;RHOC;RAB20;GBP4;EEF2;RAB6D;RRAGC;RHEBL1;RAB11B;TBCC;RAC1;RASD2;GNAL;RAB31;R…	L3-5IT-3
1109	GO_Biological_Process_2023__Hemopoiesis (GO:0030097)	-0.260523	-1.7462	0.00753012	0.109423	1	35/91	21.13%	TAL1;LYL1;TGFBR2;FGFR2;ZFP36L2;PTPRC;RRAS;MYB;SFRP1;CD34;RUNX2;IL7R;MECOM;EVI2B;LCK;TEK;CSF1R;LYN;MELK;PLEK;PLD4;SFRP2;YJEFN3;ATF4;PBXIP1;GLRX5;NOTCH4;WNT5A;WNT10B;EPOR;PINK1;SBDS;PRKX;CEBPB;CEBPA	L3-5IT-3
1110	GO_Biological_Process_2023__Cholesterol Metabolic Process (GO:0008203)	-0.296718	-1.74559	0.00650407	0.109489	1	34/55	37.79%	ANGPTL3;LCAT;TM7SF2;AKR1D1;CH25H;CYP27A1;APOE;ACAA2;TSKU;SULT2B1;SCARF1;SNX17;APOB;HMGCS1;DHCR24;PMVK;PIP4P1;INSIG1;SQLE;MSMO1;NSDHL;GBA1;DHCR7;PLPP6;G6PD;CLN8;ACLY;MVK;HSD17B7;HMGCR;GBA2;FDFT1;CYP46A1;MVD	L3-5IT-3
1111	GO_Biological_Process_2023__Negative Regulation Of Cell Death (GO:0060548)	-0.289461	-1.74163	0.00501672	0.111609	1	31/59	33.44%	TNFRSF1B;CHMP2A;AMIGO2;CDK5;CCN2;MECOM;CCN3;PSMC5;GPNMB;HTRA2;MT3;ALB;GATA4;TMEM109;PINK1;NUP62;PARK7;PAX2;WFS1;BNIP3;VPS4A;CHMP4A;TIGAR;GBA1;CHMP3;CHMP5;CHMP1A;IKBKG;CHMP1B;AKT1;EIF4G1	L3-5IT-3
1112	GO_Biological_Process_2023__Regulation Of Cysteine-Type Endopeptidase Activity Involved In Apoptotic Process (GO:0043281)	-0.271408	-1.7412	0.00796178	0.111239	1	29/73	22.34%	PYCARD;SYK;TNFSF10;CARD16;CASP1;NDUFA13;TRIAP1;GPX1;UACA;NODAL;CLEC7A;SOX2;CDKN2D;HTRA2;CTSD;CYCS;FIS1;VEGFA;LAMTOR5;ARL6IP5;REST;CARD8;SOX7;GPER1;DHCR24;ARL6IP1;NLRP2;BCAP31;PAX2	L3-5IT-3
1113	GO_Biological_Process_2023__Antimicrobial Humoral Immune Response Mediated By Antimicrobial Peptide (GO:0061844)	-0.399241	-1.7401	0.00682594	0.111662	1	11/22	14.26%	H2BC12;ROMO1;FAU;H2BC21;CXCL14;GAPDH;H2BC8;CXCL5;PGLYRP1;RPL39;RPS19	L3-5IT-3
1114	GO_Biological_Process_2023__Negative Regulation Of Amyloid-Beta Formation (GO:1902430)	-0.448943	-1.73793	0.00875657	0.112123	1	14/16	48.28%	IGF1;APOE;CLU;PRNP;CHRNA7;PIN1;APEX1;RTN4;RTN2;GGA3;BIN1;SORL1;RTN3;NTRK2	L3-5IT-3
1115	WikiPathway_2023_Human__Parkin Ubiquitin Proteasomal System Pathway WP2359	-0.278271	-1.73596	0.00770416	0.11282	1	22/67	17.44%	TUBB2A;HSPA8;CASP1;TUBB1;TUBA4A;HSPA1L;PSMC3;STUB1;GPR37;PSMC5;TUBA1A;TUBB4B;PSMD8;TUBA1B;SEPTIN5;HSPA5;TUBB4A;HSPA1A;HSPA2;PSMD10;TUBB;CASP8	L3-5IT-3
1116	GO_Molecular_Function_2023__Endopeptidase Activity (GO:0004175)	-0.206056	-1.72986	0.00134771	0.116097	1	82/242	23.37%	PRSS36;USP17L2;ADAMDEC1;KLK7;CASP4;ADAM33;PSMB6;ADAMTS20;ADAMTS12;MMP23B;KLK6;ADAM28;MASP1;CASP1;PROC;ACE2;PSMB10;HPR;KLK5;ADAMTS4;PRSS54;MMP19;F7;CASP10;ADAM7;ELANE;HTRA4;MMP20;NAPSA;SFRP1;CLCA4;MME;ADAM12;USP17L7;ADGRG6;PGA3;PRSS48;SHH;ADAMTS6;MMEL1;ADAMTS18;KLK15;EEF1AKMT4-ECE2;ADAMTS7;MMP15;PCSK5;PRSS3;ADAMTS1;ADAMTS5;CLCA1;HTRA2;PCSK6;CTSD;PSMB9;ADAMTS15;PARL;PLAT;RHBDL1;APEH;MMP26;MST1;PAPP…	L3-5IT-3
1117	GO_Biological_Process_2023__Inorganic Cation Import Across Plasma Membrane (GO:0098659)	0.226569	1.72745	0	0.17166	1	42/97	26.96%	TRPV5;SCN5A;SCN10A;SCNN1B;SLC24A4;SLC39A12;SLC12A3;CACNA1S;SLC5A2;SLC9A2;AQP8;HCN4;FXYD2;SCN9A;SLC9A3;SCN7A;ATP1A4;SLC12A4;KCNJ5;SCNN1A;SLC9C2;NALF2;KCNJ1;KCNE2;CACNA1G;KCNJ12;KCNJ14;SLC12A1;TRPV4;ABCC9;TRPV1;SLC9A5;KCNK9;TRPM4;CACNA1A;SLC39A8;CACNA1I;SLC8A1;SLC12A8;SCN11A;SLC39A14;ATP2B4	L3-5IT-3
1118	GO_Biological_Process_2023__Regulation Of ERK1 And ERK2 Cascade (GO:0070372)	-0.214617	-1.7232	0.00283688	0.117768	1	63/193	19.67%	ADRA1D;DUSP4;CALCR;P2RY1;FGFR2;PYCARD;SYK;DUSP10;DUSP6;MUSK;NPNT;EGFR;NOTCH1;PTPRC;FFAR4;CIB1;GSTP1;SPRY1;GLIPR2;PDGFRA;RRAS;TLR4;GBP1;DDT;EZR;PLA2G5;HTR2B;PDGFD;FGF1;NODAL;CCN2;P2RY6;ADCYAP1;NECAB2;HLA-DRB1;CHI3L1;IGF1;HRAS;GPNMB;HTR2C;TEK;CSF1R;LYN;ACKR3;MT3;GCNT2;GATA4;DDR1;APOE;CD74;ALKAL2;FGF2;PHB1;PRKCA;RGS14;PHB2;SPRED3;SPRED1;CD4;ANGPT1;GPER1;GAREM1;BMP2	L3-5IT-3
1119	GO_Biological_Process_2023__Negative Regulation Of Intrinsic Apoptotic Signaling Pathway (GO:2001243)	-0.285541	-1.72021	0.00803859	0.118998	1	32/56	37.09%	NDUFA13;CXCL12;PPIA;CDKN2D;HTRA2;CREB3L1;HSPA1A;SFRP2;NDUFS3;DNAJA1;TPT1;CREB3;PINK1;DDIAS;SELENOS;PPIF;PARK7;CLU;MAPK7;ENO1;XBP1;HYOU1;SYVN1;BCL2;AKT1;NOC2L;HERPUD1;BAG5;ARHGEF2;TRIM32;SOD2;BCL2L2	L3-5IT-3
1120	GO_Biological_Process_2023__Regulation Of Angiogenesis (GO:0045765)	-0.219171	-1.71702	0.00143472	0.120618	1	61/173	20.41%	TNMD;PIK3CG;ANGPTL3;TSPAN12;ITGAX;SPHK1;SPARC;RHOJ;ETS1;SEMA3E;HSPG2;RRAS;CCR3;STAB1;RGCC;FLT1;SFRP1;CD34;SEMA5A;FGF1;GHRL;NODAL;DCN;SPINK5;CYP1B1;CHI3L1;RAMP2;HK2;SMOC2;GPNMB;CLDN5;TNFSF12;ADAMTS1;HSPB6;TEK;EFNA3;THBS2;SULF1;GATA4;SFRP2;TMIGD2;YJEFN3;RAPGEF3;LEP;NINJ1;VEGFA;MINAR1;FGF2;HMGA2;WNT5A;PRKCA;PDCL3;PIK3R6;RHOB;SPRED1;SASH1;SERPINF1;GRN;ISM1;ECM1;HYAL1	L3-5IT-3
1121	GO_Biological_Process_2023__Negative Regulation Of Neuron Death (GO:1901215)	-0.261253	-1.71584	0.00757576	0.121176	1	40/79	33.44%	CLCF1;TOX3;NGF;TNFRSF1B;NDNF;NFATC4;SEMA3E;CDK5;UNC5B;SET;GPNMB;ERBB3;BDNF;MDK;HTRA2;MT3;MAG;ATF4;APOE;SOD1;FGF20;GPRASP3;PINK1;GRN;PARK7;TGFB3;CLU;PTPRZ1;WFS1;GBA1;VSTM2L;CRLF1;NRBP2;PRKCG;IKBKG;IL6ST;BCL2;AKT1;AGAP2;EIF4G1	L3-5IT-3
1122	GO_Biological_Process_2023__Positive Regulation Of MAPK Cascade (GO:0043410)	-0.204666	-1.71394	0	0.122294	1	81/244	20.26%	ADRA1D;AVPR1B;CALCR;P2RY1;FGFR2;PIK3CG;PYCARD;MUSK;LPAR1;NPNT;EGFR;NOTCH1;PTPRC;LAPTM5;PIK3R5;IGFBP6;TBX1;FFAR4;CIB1;GLIPR2;ADRA2C;PDGFRA;TLR4;ELANE;FLT1;ADRA2A;DDT;PLA2G5;HTR2B;PDGFD;FGF1;GHRL;NODAL;CCN2;P2RY6;ADCYAP1;NECAB2;HLA-DRB1;PPIA;GPR37;CHI3L1;IGF1;CD24;HRAS;GPNMB;HTR2C;SOX2;GPR37L1;CD81;TEK;CSF1R;ACKR3;MT3;GCNT2;GATA4;INAVA;DDR1;APOE;LEP;DIRAS1;SOD1;LAMTOR1;CD74;VEGFA;ALKAL2;FGF2;PHB1;P…	L3-5IT-3
1123	GO_Biological_Process_2023__Negative Regulation Of Inflammatory Response (GO:0050728)	-0.248934	-1.71315	0.0015748	0.122563	1	42/94	27.76%	SYK;TNFRSF1B;SLAMF8;PROC;FFAR4;GSTP1;IRGM;ELANE;YES1;SIGLEC10;GHRL;ELF4;CCN3;HLA-DRB1;TNFAIP6;IGF1;MDK;TEK;LYN;RHBDF2;PRKCD;APOE;RPS19;TNFRSF1A;MMP26;FNDC4;PPARA;IL10RA;GPER1;SELENOS;GRN;NR1D1;GPS2;MACIR;CXCL17;PLK2;MAPK7;PTGIS;TRIM45;GBA1;FEM1A;SHARPIN	L3-5IT-3
1124	GO_Biological_Process_2023__Regulation Of Heart Rate By Cardiac Conduction (GO:0086091)	0.296602	1.70653	0	0.177962	1	14/38	16.15%	SCN5A;DSP;KCNH6;HCN4;CAV1;DSG2;PKP2;KCNE1;JUP;KCNJ5;KCNE2;KCNE3;CACNA1G;DSC2	L3-5IT-3
1125	GO_Biological_Process_2023__Mitochondrion Organization (GO:0007005)	-0.220155	-1.70302	0.00286123	0.125941	1	93/153	47.04%	COX7A1;HIGD2A;ATP5F1D;TSPO;CHCHD2;RAB5IF;TIMM10;TOMM22;TIMM8B;HSD17B10;CHCHD10;HK2;HIGD1B;TIMM17B;CHCHD4;BCS1L;STOML2;TYMP;TIMM13;TOMM7;FMC1;AIP;COX7A2;MTX1;FIS1;SLC25A4;PHB1;TOMM20;CAV2;HIGD1A;PHB2;PINK1;HAX1;PARK7;BAX;RAB32;BCAP31;TMEM70;TIMM17A;PRDX3;BNIP3;DNAJC19;GBA1;MUL1;PARP1;MIEF1;CLUH;TOMM5;PLD6;TMEM11;COX7A2L;APEX1;CHCHD7;THG1L;TOMM40;TOMM34;ATP7A;WDR81;ATAD3B;ATAD3A;IFIT2;MSTO1;HSPD1;R…	L3-5IT-3
1126	KEGG_2021_Human__Insulin secretion	-0.258741	-1.69908	0.00462963	0.127326	1	36/79	30.96%	CCK;ADCY4;RAB3A;ATP1A2;KCNMB2;PLCB2;ADCYAP1;CREB3L3;FFAR1;GIP;CREB3L1;ATF4;VAMP2;SLC2A2;ATP1B2;CACNA1F;CREB5;PRKCA;CREB3;ATP1A3;GCK;KCNMB1;ADCY7;GNAS;STX1A;KCNN2;ATP1B1;SLC2A1;CREB3L2;ATP1A1;KCNJ11;ATF6B;PLCB3;PRKCG;KCNN1;CREB3L4	L3-5IT-3
1127	GO_Biological_Process_2023__Negative Regulation Of Amyloid Precursor Protein Catabolic Process (GO:1902992)	-0.421384	-1.69709	0.0087108	0.1286	1	15/18	48.28%	IGF1;APOE;CLU;PRNP;CHRNA7;PIN1;APEX1;RTN4;FLOT2;RTN2;GGA3;BIN1;SORL1;RTN3;NTRK2	L3-5IT-3
1128	GO_Biological_Process_2023__Positive Regulation Of Cell Population Proliferation (GO:0008284)	-0.187699	-1.69161	0	0.131029	1	123/401	20.46%	AIF1;ADRA1D;HAS2;CLCF1;CD86;TGFBR2;FGFR2;TBX3;TBX20;SOX11;CDCA7L;MEIS2;SLC25A5;HES5;PTHLH;ITGAX;SPHK1;EGFR;NOTCH1;PTPRC;NR4A3;ROMO1;TBX1;BAMBI;EGR4;NME2;PROX1;BIRC5;CIB1;NME1;S1PR2;HES1;EREG;COPS9;SINHCAF;PDGFRA;LEF1;SOX4;ZNF703;VIP;CXCL5;GREM1;RBPMS2;RPS4X;ELANE;CALR;BST2;FGF8;ADRA2A;SFRP1;S100B;RPS9;IL18;HTR2B;RHOG;MEGF10;CTF1;PDGFD;FGF1;RPS15A;IL7R;NODAL;SHH;IGF1;CLEC7A;CLEC11A;TIMP1;HRAS;PTGF…	L3-5IT-3
1129	GO_Biological_Process_2023__Positive Regulation Of Cysteine-Type Endopeptidase Activity Involved In Apoptotic Process (GO:0043280)	-0.242274	-1.69141	0.00458716	0.130836	1	36/97	22.13%	ST18;PYCARD;SYK;TNFSF10;LAPTM5;CASP1;NDUFA13;UACA;BEX3;CASP10;RFPL1;HSPE1;NODAL;DYNLL1;CLEC7A;NLRC4;LCK;HTRA2;ACVR1C;NLRP1;CTSD;ATP2A3;CYCS;HIP1;FIS1;ARL6IP5;CASP8;REST;PRR7;CARD8;SOX7;GPER1;RACK1;NLRP2;BAX;BCAP31	L3-5IT-3
1130	GO_Biological_Process_2023__Response To Molecule Of Bacterial Origin (GO:0002237)	0.264773	1.69013	0.008	0.182256	1	17/53	14.68%	CXCL8;IL12A;NOS3;SMAD6;TNFAIP3;IL23R;PALM3;SELE;F2R;LGALS9;MAPKAPK3;SELP;PTPN22;NOS2;LY96;SLC11A1;CD6	L3-5IT-3
1131	GO_Cellular_Component_2023__Mitochondrial Envelope (GO:0005740)	-0.223902	-1.68349	0.00753012	0.13508	1	50/138	24.85%	PRELID1;CIDEA;BLOC1S1;NDUFA13;NDUFA2;TRIAP1;HCRT;CHCHD2;IRGM;TIMM10;GPAT2;IFI27L2;TIMM8B;ALPL;CHCHD10;NDUFB7;CHCHD4;ARL2;STOML2;HTRA2;VRK2;TIMM13;NDUFA1;CYCS;CHCHD5;SOD1;NDUFA6;NDUFS3;COA7;SLC25A4;TIMM8A;NGRN;PINK1;COA4;IFI27;ATP5F1B;NDUFAB1;GPER1;HAX1;NDUFA8;NME4;TMEM70;NAT8L;VDAC1;SLC8B1;UQCC2;TMEM14B;NDUFAF4;BNIP3;FKBP8	L3-5IT-3
1132	GO_Biological_Process_2023__Regulation Of Protein Localization (GO:0032880)	-0.246265	-1.66445	0.00597907	0.145123	1	52/90	42.15%	TRIM21;TRIM38;KRT5;VIP;RFPL1;SHH;ADCYAP1;HFE;ITGB3;BDNF;MMD2;HSP90AB1;CTSD;TRIM22;HSP90AA1;GPC3;SUMO3;RFPL3;NEDD9;RACK1;RAB11B;TRIM5;MAP1A;MMD;CAMK1;TRIM68;FKBP1A;TESK1;VPS4A;PIN1;PARP1;TRIM58;TRIM17;RSL1D1;DVL1;STX10;ABCA2;FBXW7;GPC1;TOR1A;TRIM46;RAB14;BORA;DVL3;ATCAY;CTNNB1;PPM1F;RAB11FIP5;DNAJB6;VCPIP1;VCP;ATP13A2	L3-5IT-3
1133	GO_Cellular_Component_2023__Basolateral Plasma Membrane (GO:0016323)	0.196315	1.66019	0.00628931	0.194194	1	42/153	15.42%	GPIHBP1;SLC22A3;SLC4A11;SLC4A1;CLDN1;EPCAM;TRPC4;ERBB4;SLC14A1;SLCO1C1;TGFA;AQP8;SLC40A1;ANK1;RHBG;PDPN;C5AR1;AQP1;ABCC6;ALPK2;SLC26A7;CD44;LPO;ANXA2;MYO1A;MARVELD2;AQP7B;AQP7;SLC22A7;ADCY8;ABCC3;CDH17;EPB41;AQP4;B4GALT1;PLPP3;ENPP1;RAB17;SLC6A13;NOD1;PDGFB;VSIG1	L3-5IT-3
1134	KEGG_2021_Human__PI3K-Akt signaling pathway	-0.1915	-1.65403	0.00659631	0.150949	1	85/296	17.73%	COL4A5;CSF3R;MET;GNG3;FGFR2;PIK3CG;NGF;SYK;TNC;LPAR1;EGFR;COL9A2;PIK3R5;COL1A2;GNG12;LPAR5;COL9A1;GNGT2;RELN;ITGB5;EREG;PDGFRA;TLR4;MYB;GNG10;IL2RA;FGF8;GNG13;FLT1;LPAR4;CCND1;COL6A2;PDGFD;YWHAH;ITGA2;FGF1;IL7R;COL9A3;EFNA2;IGF1;CREB3L3;LPAR3;HRAS;ERBB3;ITGB3;BDNF;PIK3AP1;TEK;CSF1R;FGF6;ITGB4;MTCP1;EFNA3;CREB3L1;SPP1;HSP90AB1;THBS2;LAMC3;DDIT4;PCK2;LPAR6;ATF4;VWF;IL4R;HSP90AA1;LAMA1;CDK6;FGF20;VE…	L3-5IT-3
1135	GO_Biological_Process_2023__Regulation Of Cell Migration (GO:0030334)	-0.183474	-1.65163	0	0.151885	1	116/386	21.21%	SST;AIF1;HAS2;TMIGD3;NTNG1;USP17L2;ANGPTL3;DUSP10;TNC;THY1;ITGAX;SPHK1;EGFR;NOTCH1;SEMA6D;CORT;TMSB10;DAAM2;ANXA1;TRIP6;RELN;CIB1;PLEKHG3;PODN;SEMA3E;SINHCAF;PDGFRA;MITF;VSIR;CLIC4;KRT5;LEF1;PLXNB3;CXCL12;ZNF703;F7;TMSB4Y;ENPP2;BST2;FGF8;CDH1;FLT1;ADRA2A;SFRP1;SEMA5A;DOCK10;TMSB4X;SEMA3B;SEMA3D;PDGFD;FGF1;CSRP3;SHH;MIEN1;SPATA13;DYNLL1;SEMA3C;CYP1B1;IGF1;CLEC7A;HRAS;GPNMB;ROBO4;SERPINE2;LGR6;KIF2…	L3-5IT-3
1136	GO_Cellular_Component_2023__Cell-Cell Junction (GO:0005911)	0.170375	1.64941	0.00401606	0.196562	1	78/273	19.09%	GJB3;CLDN1;FGFR4;PCDHGB4;DSP;SAPCD2;VANGL2;STXBP6;KIRREL2;CD53;TRPC4;DSC1;KIRREL1;MAPK15;KIAA1210;NDRG1;PDLIM1;PDLIM5;PARD3;CNN2;JAG1;PARD3B;GJA1;POF1B;VSIG10L2;LLGL1;FOXM1;GAB1;PECAM1;DSG2;TRIM29;PKP2;ANXA2;MARVELD2;GJB6;LLGL2;AQP7;CDH6;MYO1E;TMEM47;NIBAN2;CDH5;CDH17;FGFRL1;B4GALT1;AHNAK;TJP2;PDZD2;JUP;IGSF11;PLPP3;PERP;STEAP1;CDH22;CDC42EP4;F11R;NPHS1;CLDN4;CDH26;FLCN;NRAP;HMCN1;LIMD1;FERMT2;CE…	L3-5IT-3
1137	WikiPathway_2023_Human__Metapathway Biotransformation Phase I And II WP702	0.20229	1.64654	0.00623053	0.195444	1	52/127	23.66%	CYP4F2;GSTM5;CYP4F3;CYP3A4;GLYAT;CYP11A1;SULT6B1;CYP2A6;CHST6;SULT2A1;CYP4F22;CYP3A43;SULT1B1;CYP21A2;GAL3ST4;CYP2D6;SULT1A2;GAL3ST2;INMT;HS6ST3;CYP3A5;GAL3ST1;CHST11;CYP2S1;HS3ST3A1;GSTM2;CYP39A1;GPX2;CHST8;EPHX1;CYP27C1;AKR1C2;KCNAB3;MGST2;GLYATL1;CHST7;HS3ST5;NNMT;AKR1C1;AKR7A3;CYP20A1;CYP2C8;CYP2R1;CYP51A1;GSTM3;CHST1;BAAT;EPHX2;SULT1A1;AKR1C3;HS6ST1;CHST12	L3-5IT-3
1138	GO_Biological_Process_2023__Central Nervous System Development (GO:0007417)	-0.195626	-1.64492	0.00847458	0.156215	1	120/255	38.50%	ZIC4;SHROOM4;TGFBR2;ZIC1;CX3CR1;SOX11;UGT8;MEIS2;HES5;KLK6;AMIGO2;MOG;FOXR1;PROX1;NKX2-2;RELN;C3;GSTP1;MAL;EGR2;HSPG2;PCDH18;SOX4;CDK5;EMX2;S100B;SYNJ2;LOXL3;CA10;NNAT;SHH;CDK5R2;PAX6;ITGAM;SPINK5;GRIN2C;EEF1AKMT4-ECE2;ZIC2;MYRF;PBX3;VIT;UFC1;DDIT4;MARCKSL1;CHD7;SOX10;CAPG;COX7B;SOX8;PAFAH1B3;MARCKS;PSPN;GRIN2D;QARS1;GRHL2;THOC6;PHGDH;ATP6AP2;PPP1R17;NHLH1;ROGDI;CDK5R1;AFF2;AIM2;TMX2;UTP3;DNAJC30…	L3-5IT-3
1139	WikiPathway_2023_Human__PI3K Akt Signaling Pathway WP4172	-0.191775	-1.6421	0.00402685	0.158146	1	81/283	17.73%	COL4A5;CSF3R;MET;GNG3;FGFR2;PIK3CG;NGF;SYK;TNC;LPAR1;EGFR;COL9A2;PIK3R5;COL1A2;GNG12;LPAR5;COL9A1;GNGT2;RELN;ITGB5;PDGFRA;TLR4;MYB;GNG10;IL2RA;FGF8;GNG13;FLT1;LPAR4;CCND1;COL6A2;PDGFD;ITGA2;FGF1;IL7R;COL9A3;EFNA2;IGF1;CREB3L3;LPAR3;HRAS;ITGB3;BDNF;PIK3AP1;TEK;CSF1R;FGF6;ITGB4;EFNA3;CREB3L1;SPP1;HSP90AB1;THBS2;LAMC3;DDIT4;PCK2;LPAR6;ATF4;VWF;IL4R;HSP90AA1;LAMA1;CDK6;FGF20;VEGFA;GNG4;RPS6;IL6R;PIK3…	L3-5IT-3
1140	MSigDB_Hallmark_2020__Apoptosis	-0.214937	-1.63847	0.00716332	0.159459	1	65/148	30.54%	KRT18;GPX4;CASP4;TNFRSF12A;TNFSF10;IGFBP6;CASP1;ANXA1;GPX3;CD69;EREG;TSPO;LEF1;GPX1;IL18;DDIT3;CCND1;IER3;PLCB2;DCN;EGR3;CD14;TIMP1;ERBB3;GADD45A;H1-0;BTG3;GNA15;EBP;NEFH;SOD1;PLAT;ENO2;JUN;DNAJA1;GUCY2D;CD38;ISG20;GADD45B;CASP8;RHOB;CCNA1;BIRC3;AIFM3;BMP2;NEDD9;CASP7;HMGB2;BAX;CLU;BCAP31;PPP3R1;FDXR;ATF3;PEA15;TIMP2;PPP2R5B;RARA;GCH1;VDAC2;DAP;IRF1;RNASEL;GSN;CDKN1B	L3-5IT-3
1141	GO_Biological_Process_2023__Proteasomal Protein Catabolic Process (GO:0010498)	-0.198562	-1.61755	0.00966851	0.172158	1	187/212	66.73%	RCAN3;PSMB6;RNF5;TRIM21;PSMC3;DDIT3;STUB1;PSMC5;PSMD8;RNF122;UBXN1;RNF187;SPSB4;NHLRC1;USP44;PSMA8;PEX12;PEX10;PSMA7;IFI27;PSMB4;PSMB5;NR1D1;PSMB3;ZFAND2A;KAT5;SPSB2;ENC1;UCHL1;TBL1X;ZFAND2B;PSMD7;PSMA4;GSK3A;KBTBD6;ANKRD9;KCTD17;FBXO45;XBP1;FBXL22;UBXN6;PSMD2;KLHDC3;KBTBD7;CDC34;KCTD5;SHARPIN;FBXW5;TNFAIP1;PSMC4;RAD23A;SYVN1;BAG6;HECTD3;SPSB3;FBXL19;GID8;RNF126;PSMD3;APC2;FBXW7;AXIN2;FBXO44;FEM1…	L3-5IT-3
1142	GO_Biological_Process_2023__Cellular Response To Lipid (GO:0071396)	-0.2045	-1.60422	0.00886263	0.180013	1	76/179	29.92%	UCP1;WNT6;CD86;PYCARD;CX3CR1;SYK;TNFRSF1B;EGFR;TBX1;CARD16;HSPA8;CASP1;LILRB1;NDUFA13;GSTP1;IRGM;ZNF703;TLR4;CXCL5;SFRP1;AXL;ATP1A2;PTK6;WNT7B;CD14;TNIP2;CRHBP;LTK;WNT3A;LCP1;LYN;HTRA2;FES;WNT8B;SPP1;H2AZ1;HSPA1A;TNIP3;MSN;SSTR1;NUGGC;ADTRP;WNT5A;MEIOSIN;WNT10B;ATP1A3;PTK7;VIM;NFKBIB;GPER1;SELENOS;CASP7;PDCD1LG2;HMGB2;NR1D1;KAT5;PAX2;MGST1;INSIG1;TWF2;NFKBIL1;CFTR;SPHK2;XBP1;SSTR2;TESC;RUVBL2;SBN…	L3-5IT-3
1143	KEGG_2021_Human__Calcium signaling pathway	-0.195207	-1.60079	0.00981767	0.182756	1	76/213	23.97%	ADRA1D;AVPR1B;MET;FGFR2;PPP3R2;CACNA1H;NGF;CYSLTR2;SLC25A5;SPHK1;EGFR;P2RX1;ADCY4;PDGFRA;TBXA2R;DRD5;FGF8;FLT1;HTR2B;TACR3;PDGFD;EDNRA;FGF1;ADORA2B;PLCB2;GRIN2C;PTGFR;ERBB3;HTR2C;CYSLTR1;ORAI3;CASQ1;FGF6;CALM2;MCOLN2;CALM3;GNA15;ITPR2;CALM1;NTSR1;ATP2A3;TACR2;ORAI1;PLN;FGF20;VEGFA;FGF2;P2RX5;CD38;SLC25A4;CACNA1F;PRKCA;GRIN2D;PTAFR;MST1;ADRA1B;CHRM5;GRPR;RYR3;HTR4;PPIF;NOS1;PLCE1;FGF7;ADCY7;HRH1;G…	L3-5IT-3
1144	GO_Cellular_Component_2023__Vacuolar Lumen (GO:0005775)	-0.211959	-1.59847	0.00872093	0.183129	1	66/138	33.84%	MNDA;PYCARD;SDC1;TUBB2A;VCAN;HSPA8;SDC4;TRAPPC1;C3;HSPG2;ELANE;DCN;TCN2;FMOD;TUBB4B;GPC6;NEU4;PRKCD;CTSD;HSP90AA1;CD74;GPC3;NAPRT;GPC4;FABP5;FTL;FRK;PADI2;APOB;PTGES2;NPC2;GRN;OGN;HYAL1;CBLIF;AGA;BCAN;CEL;PA2G4;ARG1;CTSF;NEU1;CTSL;SDC2;SMPD1;AGRN;GBA1;ARSA;CTSA;SDC3;TOLLIP;DPP7;PSAP;IDUA;OMD;GLA;CSPG5;ACLY;PPT2;CHID1;GM2A;PRDX6;GPC1;FUCA2;CCT8;IMPDH1	L3-5IT-3
1145	KEGG_2021_Human__Hippo signaling pathway	0.189922	1.59225	0.00645161	0.222989	1	52/156	21.20%	AFP;WNT9A;SERPINE1;BMP6;LATS2;RASSF6;WNT16;FZD7;TP73;PARD3;BMP4;MYC;FZD8;BMP5;YAP1;WNT2;GDF6;LLGL1;FZD9;WNT11;WNT9B;BMP8B;WNT4;AMH;SMAD3;LLGL2;FZD1;TEAD2;AMOT;GDF5;GDF7;TCF7;TP53BP2;WNT8A;CCND3;ID1;BMP8A;LIMD1;TGFB2;BBC3;WTIP;TGFB1;WNT3;CSNK1E;WNT7A;TPTEP2-CSNK1E;ITGB2;WNT5B;DLG4;WNT2B;TCF7L2;FZD6	L3-5IT-3
1146	GO_Biological_Process_2023__Cellular Response To Oxygen-Containing Compound (GO:1901701)	-0.179576	-1.59203	0.00263852	0.18616	1	129/343	29.36%	CRYGD;UCP1;WNT6;PDXP;CD86;P2RY1;PYCARD;CACNA1H;CX3CR1;TNFRSF1B;EGFR;NR4A3;GUCA1A;ROMO1;TBX1;PRDX5;CARD16;CASP1;SYT6;LILRB1;NDUFA13;GSTP1;PDGFRA;CLIC4;ALOX5AP;SYT10;DRD5;IRGM;CPNE2;ZNF703;TLR4;CXCL5;FOXO1;CDH1;SFRP1;AXL;EZR;FOS;SLC13A2;PTK6;EGR1;P2RY12;RRAGA;WNT7B;P2RY6;SH3BP4;CD14;TNIP2;GLRA2;CRHBP;LTK;MPV17L2;LAMTOR2;WNT3A;LCP1;KCNQ1;LYN;HTRA2;MT3;CPNE6;FES;SLC13A5;WNT8B;H2AZ1;PRKCD;RAPGEF3;TNIP…	L3-5IT-3
1147	KEGG_2021_Human__Protein processing in endoplasmic reticulum	-0.208065	-1.59067	0.0042796	0.187342	1	149/163	69.31%	SSR4;RNF5;HSPA8;CALR;HSPA1L;DERL3;DDIT3;STUB1;HSPA5;HSP90AB1;HSPA1A;SEC61G;HSPA2;ATF4;UBXN1;DNAJC5B;HSP90AA1;DNAJA1;BAG1;CRYAB;UBQLN2;SELENOS;SEC61B;ERP29;PPP1R15A;BAX;SSR2;BCAP31;WFS1;DNAJB11;XBP1;PREB;DNAJC5G;UBXN6;DNAJC5;DNAJA2;HSPBP1;HSP90B1;HYOU1;ATF6B;RAD23A;SYVN1;YOD1;PDIA4;MOGS;PRKCSH;UBXN8;CKAP4;FBXO2;BCL2;TRAM1L1;P4HB;SVIP;EDEM2;MAN1A1;HERPUD1;DAD1;RRBP1;SEC62;DNAJB1;ERLEC1;SKP1;DERL2;M…	L3-5IT-3
1148	GO_Molecular_Function_2023__GTP Binding (GO:0005525)	-0.198727	-1.58771	0.00727802	0.189037	1	119/189	47.71%	GIMAP7;ARL4D;TUBB2A;RHOJ;NME1;GBP6;TUBB1;RERG;GEM;RRAS;TUBA4A;GBP1;RAB13;SEPTIN12;RND3;RHOG;RRAGA;ARL11;HRAS;RASL12;TUBA1A;RAN;TUBB4B;ARL2;TUBA1B;ARF5;RHOV;RAB42;RAC3;GNA15;TUBB4A;ARF3;DIRAS1;GLUD2;RHOU;RAB33A;ARL4C;RND2;RHOB;GBP7;RHOC;GBP4;RRAGC;RHEBL1;RAB11B;RAC1;TUBG1;RAB31;RAB32;SEPTIN4;SCG5;RAB39B;ARF6;TUBB6;GNA14;RAB39A;RAB1B;EEF1A1;RND1;TUBG2;DIRAS2;ARL8A;ARF1;EIF2B2;RABL6;GCH1;TUBB2B;RAB2…	L3-5IT-3
1149	KEGG_2021_Human__Pathways in cancer	0.151279	1.58551	0.00458716	0.228848	1	127/471	18.43%	CXCL8;KNG1;NKX3-1;KIT;HGF;PTGER4;IL12A;GSTM5;HMOX1;IL3RA;GNG8;WNT9A;VEGFC;FGFR4;FLT3LG;CXCR4;WNT16;TGFA;CDKN2A;LAMA2;FZD7;IL23R;BMP4;COL4A6;CDK2;MYC;PLD2;FGF23;FZD8;PTGER3;BDKRB2;DLL4;JAG1;ITGA6;CDKN2B;F2R;WNT2;FLT3;FZD9;WNT11;WNT9B;LAMB2;DAPK1;AR;RASGRP4;F2;WNT4;PAX8;FGF10;CKS2;CDKN1A;FGFR3;NTRK1;EDNRB;SMAD3;RUNX1;IL5;LAMC2;FGF17;LPAR2;TERT;ADCY8;IL2RB;IL5RA;FGF18;EGF;COL4A2;FZD1;LAMA3;PIM1;FRAT…	L3-5IT-3
[truncated: 1,992 more rows]
