# Supplementary material for: Single-Cell Multi-Modal Differential Analysis of the Human Neo-Cortex in HIV Infection Reveals Similarities with Hallmarks of Alzheimer’s Disease
Source: Research Square preprint supplement (doi:10.21203/rs.3.rs-7636879/v1), 2025-11-01
Supplement: Supplementary file 6 [file cfe3239f8aee2f01334e529a.xlsx]

## Sheet: Sheet1
	Term	ES	NES	NOM p-val	FDR q-val	FWER p-val	Tag %	Gene %	Lead_genes	cell_type
0	WikiPathway_2023_Human__Cytoplasmic Ribosomal Proteins WP477	-0.615938	-4.18352	0	0	0	76/88	28.50%	RPS14;RPL10;RPS23;RPS13;RPL19;RPL3;RPL30;RPL9;FAU;RPS4X;RPS11;RPL29;RPS15;RPL10A;RPS27A;RPL7A;RPL7;RPS18;RPS3A;RPS9;RPL32;RPLP2;RPS4Y1;RPL27A;RPS25;RPL26;RPS16;RPS7;RPL34;RPL23;RPS12;RPS28;RPS8;RPL39;RPL27;RPS21;RPS5;RPL12;RPL24;RPL15;RPL8;RPS15A;RPL14;RPL41;RPL18A;UBA52;RPL18;RPS20;RPLP1;RPL13;RPS6;RPL13A;RPL23A;RPL11;RPL38;RPS2;RPL21;RPL28;RPLP0;RPS26;RPS3;RPL37;RPS6KA6;RPS10;RPL36;RPL35A;RPL5;…	vascular
1	GO_Biological_Process_2023__Cytoplasmic Translation (GO:0002181)	-0.581009	-4.04762	0	0	0	73/92	26.44%	RPS14;RPL10;RPS23;RPS13;RPL19;RPL3;RPL30;RPL9;FAU;RPS4X;RPS11;RPL36AL;RPL29;RPS15;RPL10A;RPS27A;RPL7A;RPL7;RPS18;RPS3A;RPS9;RPL32;RPLP2;RPL27A;RPS25;RPL26;RPS16;RPS7;RPL34;RPS28;RPS8;RPL39;RPL27;RPS21;RPS5;RPL12;RPL24;RPL15;RPL8;RPS15A;RPL14;RPL41;RPL18A;UBA52;RPL18;RPS20;RPLP1;RPL13;RPS6;RPL13A;MRPS12;RPL23A;RPL11;RPL38;RPS2;RPL21;RPL28;RPLP0;RPS26;RPS3;RPL37;RPS10;RPL36;RPL35A;RPL5;RPL6;RPL35;R…	vascular
2	GO_Cellular_Component_2023__Large Ribosomal Subunit (GO:0015934)	-0.641513	-3.68983	0	0	0	43/49	26.44%	RPL19;RPL3;RPL30;RPL9;RPL36AL;RPL29;RPL10A;RPL7A;RPL7;RPL32;RPLP2;RPL27A;RPL26;RPL34;RPL39;RPL27;RPL12;RPL24;RPL15;RPL8;RPL14;RPL41;RPL18A;UBA52;RPL18;RPLP1;RPL13;RPL13A;RPL23A;RPL11;RPL38;RPL21;RPL39L;RPL28;RPLP0;RPL37;RPL36;RPL35A;RPL5;RPL6;RPL35;RPL4;RPL22	vascular
3	GO_Cellular_Component_2023__Cytosolic Large Ribosomal Subunit (GO:0022625)	-0.641513	-3.68983	0	0	0	43/49	26.44%	RPL19;RPL3;RPL30;RPL9;RPL36AL;RPL29;RPL10A;RPL7A;RPL7;RPL32;RPLP2;RPL27A;RPL26;RPL34;RPL39;RPL27;RPL12;RPL24;RPL15;RPL8;RPL14;RPL41;RPL18A;UBA52;RPL18;RPLP1;RPL13;RPL13A;RPL23A;RPL11;RPL38;RPL21;RPL39L;RPL28;RPLP0;RPL37;RPL36;RPL35A;RPL5;RPL6;RPL35;RPL4;RPL22	vascular
4	GO_Biological_Process_2023__Chemical Synaptic Transmission (GO:0007268)	-0.421793	-3.66752	0	0	0	177/257	33.87%	SST;CRH;GRM3;PNOC;CORT;SNCB;PLP1;HTR1A;NSG1;GABRD;NPY5R;CRHBP;SCN2B;HTR1F;PENK;HTR2A;GABRA1;KCNK3;SNAP25;GABRA5;LIN7A;GLRA2;SLC6A1;CHRM4;SLC1A6;SHISA6;CACNB2;SYT5;GAD2;CHRM1;SLC1A3;SLC17A8;GRID1;GAD1;HRH3;HRH2;GABRE;GRIN1;CDK5;GRIN3A;NPTX2;GRIA4;SYN2;GABBR1;PDE7B;NLGN4Y;TSPOAP1;SYN1;KCNA1;GABRG2;NPTX1;SNCG;GABBR2;GPR176;GRID2;SLC12A5;SLC17A6;CDH8;KCNQ2;SNPH;SLC17A7;SYT1;NPFF;NLGN1;AMPH;GLRA1;CHRM…	vascular
5	GO_Biological_Process_2023__Anterograde Trans-Synaptic Signaling (GO:0098916)	-0.433276	-3.57603	0	0	0	128/189	31.26%	SST;CRH;GRM3;PNOC;CORT;SNCB;PLP1;HTR1A;GABRD;NPY5R;SCN2B;HTR1F;PENK;HTR2A;KCNK3;SNAP25;GLRA2;SLC6A1;CHRM4;SLC1A6;CACNB2;SYT5;GAD2;CHRM1;SLC1A3;GAD1;HRH3;HRH2;GRIN1;CDK5;NPTX2;SYN2;PDE7B;NLGN4Y;SYN1;KCNA1;NPTX1;SNCG;GABBR2;GPR176;SLC12A5;KCNQ2;SYT1;NPFF;NLGN1;AMPH;GLRA1;CHRM2;CHRNA4;APBA2;HTR2C;PCDHB2;LPAR3;KCNMB1;NTSR1;NRXN2;CACNA1E;PCDHB10;GLRB;MPZ;CACNB1;GRM4;SNCA;CHRNB2;HTR5A;CHRNB3;GABRB2;PDY…	vascular
6	KEGG_2021_Human__Ribosome	-0.473647	-3.57513	0	0	0	91/131	28.90%	RPS14;RPL10;RPS23;RPS13;RPL19;RPL3;RPL30;RPL9;FAU;RPS4X;MRPL36;RPS11;RPL36AL;RPL29;RPS15;RPL10A;RPS27A;RPL7A;RPL7;RPS18;RPS3A;RPS9;RPL32;RPLP2;RPS4Y1;RPL27A;RPS25;RPL26;RPS16;RPS7;MRPL11;RPL34;RPL23;RPS12;RPS28;RPS8;RPL39;RPL27;RPS21;RPS5;RPL12;RPL24;RPL15;RPL8;RPS15A;RPL14;RPL41;RPL18A;UBA52;RPL18;RPS20;RPLP1;RPL13;RPS6;RPL13A;MRPS12;MRPL21;RPL23A;MRPL34;MRPL17;RPL11;RPL38;RPS2;MRPS17;RPL21;MRPL…	vascular
7	KEGG_2021_Human__Neuroactive ligand-receptor interaction	-0.409202	-3.54667	0	0	0	190/276	32.29%	SST;CRH;GRP;CCK;TAC1;GRM3;CORT;AVPR1A;GRM8;HTR1A;P2RY14;GABRD;PTH1R;NPY5R;P2RY13;HTR1F;PENK;HTR2A;EDNRA;CYSLTR2;S1PR5;GABRA1;EDN3;GABRA5;ADORA2B;P2RX5;GLRA2;ADCYAP1R1;CHRM4;NPY;ADORA1;P2RX3;CHRM1;S1PR3;DRD1;ADRA2A;PTGER1;GRID1;S1PR4;APLN;TBXA2R;HRH3;HRH2;GABRE;CCKBR;AGTR1;GRIN1;C3;LPAR1;GRIN3A;SSTR2;MC4R;TACR3;GRIA4;FSHR;GABBR1;GNRHR;NMU;RXFP1;GPR83;GALR1;NPY1R;GABRG2;S1PR2;ADRA2B;ADRA1A;INSL3;GA…	vascular
8	GO_Biological_Process_2023__Peptide Biosynthetic Process (GO:0043043)	-0.450317	-3.48927	0	0	0	96/149	28.55%	EEF1A2;CARNS1;RPS14;RPL10;RPS23;RPS13;RPL19;RPL3;RPL30;RPL9;FAU;RPS4X;MRPL36;PCSK1;RPS11;RPL36AL;DMD;PCSK5;RPL29;RPS15;RPL10A;RPS27A;RPL7A;RPL7;RPS18;RPS3A;RPS9;RPL32;RPLP2;RPS4Y1;RPL27A;RPS25;RPL26;RPS16;RPS7;MRPL11;RPL34;MRPL51;RPS28;RPS8;RPL39;GSPT2;MRPL41;RPL27;RPS21;RPS5;RPL12;RPL24;RPL15;RPL8;RPS15A;RPL14;RPL41;RPL18A;RPL18;RPS20;RPLP1;RPL13;MRPL43;RPS6;RPL13A;MRPS12;RPL23A;EEF1A1;MRPL55;MR…	vascular
9	GO_Cellular_Component_2023__Small Ribosomal Subunit (GO:0015935)	-0.650118	-3.46433	0	0	0	34/38	27.77%	RPS14;RPS23;RPS13;FAU;RPS4X;RPS11;RPS15;RPS27A;RPS18;RPS3A;RPS9;RPS4Y1;RPS25;RPS16;RPS7;RPS28;RPS8;RPS21;RPS5;RPS15A;UBA52;RPS20;RPS6;MRPS12;RPS2;RPS26;RPS3;RPS10;RPS24;RPS27;RPSA;MRPS6;RACK1;RPS19	vascular
10	GO_Cellular_Component_2023__Cytosolic Small Ribosomal Subunit (GO:0022627)	-0.648226	-3.44831	0	0	0	33/37	27.77%	RPS14;RPS23;RPS13;FAU;RPS4X;RPS11;RPS15;RPS27A;RPS18;RPS3A;RPS9;RPS4Y1;RPS25;RPS16;RPS7;RPS28;RPS8;RPS21;RPS5;RPS15A;UBA52;RPS20;RPS6;MRPS12;RPS2;RPS26;RPS3;RPS10;RPS24;RPS27;RPSA;RACK1;RPS19	vascular
11	GO_Biological_Process_2023__Neuropeptide Signaling Pathway (GO:0007218)	-0.568311	-3.43982	0	0	0	42/54	25.10%	GRP;PNOC;PTGDR2;PENK;CYSLTR2;GPR149;GLRA2;GPR37;NPSR1;NPY;NPPA;NXPH2;SSTR2;NMU;GPR83;GALR1;SORCS1;SORL1;GLRA1;MCHR2;LTB4R2;NTSR1;NXPH4;GLRB;SSTR3;PDYN;SORCS3;NMUR1;MCHR1;NPBWR1;NTSR2;NMUR2;NXPH3;GAL;OPRD1;CPE;CMKLR2;SORCS2;ECEL1;SSTR1;CYSLTR1;OPRM1	vascular
12	GO_Cellular_Component_2023__Postsynaptic Specialization Membrane (GO:0099634)	-0.61898	-3.31752	0	0	0	35/38	32.73%	SYNDIG1;LRRTM1;GRID1;GRIN3A;GRIA4;CACNG3;CACNG4;GRID2;NETO1;NLGN1;CACNG8;GRIN2C;PTPRS;CACNG7;LRRTM2;PLPPR4;GRIA1;CACNG5;GRIN2B;GRIK4;GRIA2;GRIN2A;CACNG2;SLITRK3;GRIK3;GRM5;GRIK1;DLG4;GRM1;DLG3;GRIN2D;GRIA3;DAGLA;GRIK2;GRIK5	vascular
13	GO_Biological_Process_2023__Axon Development (GO:0061564)	-0.475848	-3.30854	0	0	0	58/88	29.08%	RAB3A;CCK;NEUROD6;PLP1;L1CAM;CDK5R1;APLP1;CRTAC1;SLITRK2;GAP43;OLIG2;SEMA5A;CNTN4;OLIG1;SLITRK5;SLITRK1;CDK5;MGARP;RTN4RL2;MAPT;BHLHE22;WNT7A;FGFR2;ATL1;NEFH;NEUROD2;EPHB3;NMNAT2;SLITRK4;S100B;SHTN1;ANK3;TRIM46;NTNG2;DSCAML1;S100A6;PAX2;GPM6B;BRSK1;SVBP;CTNNA2;PLPPR4;PAK3;MAP1A;DCC;SLITRK3;NTNG1;SSNA1;NRCAM;RTN4RL1;EPHB2;SPTBN4;BRSK2;AMIGO1;MAP1B;ATOH7;SLITRK6;LLGL1	vascular
14	WikiPathway_2023_Human__Electron Transport Chain OXPHOS System In Mitochondria WP111	-0.466683	-3.29881	0	0	0	65/91	34.09%	ATP5MC1;ATP5PO;NDUFA4;ATP5F1D;ATP5IF1;NDUFS5;ATP5MC3;NDUFC2;UQCRH;NDUFB10;NDUFS7;NDUFB8;COX8A;NDUFB7;NDUFB5;NDUFA1;COX5A;SLC25A4;SDHD;SLC25A5;COX6B1;COX7C;NDUFA8;COX6A1;COX5B;UQCR10;COX4I1;COX7A2;NDUFS3;NDUFA13;UQCRB;COX7B;NDUFB2;ATP5MG;UQCRQ;NDUFAB1;NDUFA2;ATP5PF;ATP5MF;COX6A2;NDUFB9;NDUFB3;COX6C;NDUFA11;ATP5PD;ATP5ME;ATP5F1E;UQCR11;NDUFA7;COX7A1;ATP5F1A;ATP5F1B;UQCRFS1;COX7A2L;NDUFS8;NDUFS6;NDU…	vascular
15	GO_Biological_Process_2023__Synapse Organization (GO:0050808)	-0.427275	-3.29555	0	0	0	84/130	30.43%	CX3CR1;SNCB;L1CAM;MUSK;CHCHD10;SLC6A1;DKK1;CACNB2;SLITRK2;DRD1;CNTN2;SLITRK1;CDK5;C1QA;TNC;DNER;C1QC;PTK7;SLC8A2;CBLN3;GPM6A;MAPT;SNCG;LRRC4B;KIRREL3;NLGN1;RAB39B;LRRC4;PCDHB2;ANK3;NRXN2;PCDHB10;PTPRS;CACNB1;SNCA;LRFN5;CDH1;PIN1;PPFIA4;NLGN4X;UNC13C;PCDHB14;PCDHB16;C5AR1;PTPRD;SLC8A3;PAK3;FLRT3;PTPRF;KY;CTNND2;SLITRK3;LRRC4C;SEMA3E;CHRNA7;NTNG1;NLGN3;ADGRF1;NRCAM;PPFIA2;PCDHB6;LRP4;PCDHB3;LRFN4;P…	vascular
16	KEGG_2021_Human__Cardiac muscle contraction	-0.485756	-3.24925	0	0	0	51/78	23.54%	ATP1A3;COX4I2;CACNA2D2;ATP1B1;CASQ2;ATP1A2;CACNB2;HRC;MYL3;SLC8A2;ATP1A4;CYC1;UQCRH;COX8A;CACNG3;CACNG4;CACNA2D3;CACNA1S;ATP1B2;COX5A;COX6B1;COX7C;CACNG8;COX6A1;COX5B;UQCR10;ACTC1;COX4I1;COX7A2;CACNA1F;UQCRB;COX7B;CACNB1;CACNG7;UQCRQ;CACNA2D4;COX6A2;CACNG5;COX6C;FXYD2;RYR2;SLC8A1;SLC8A3;CACNG2;UQCR11;ATP2A3;TPM2;COX7A1;CACNA1D;UQCRHL;UQCRFS1	vascular
17	GO_Biological_Process_2023__Aerobic Electron Transport Chain (GO:0019646)	-0.504833	-3.21148	0	0	0	51/66	35.30%	COX4I2;NDUFA4;NDUFS5;NDUFC2;CYC1;UQCRH;NDUFB10;NDUFS7;NDUFB8;COX8A;NDUFB7;NDUFB5;NDUFA1;COX5A;SDHD;COX6B1;COX7C;NDUFA8;COX6A1;COX5B;UQCR10;COX4I1;CYCS;COX7A2;NDUFS3;UQCRB;COX7B;NDUFB2;UQCRQ;NDUFAB1;NDUFA2;COX6A2;NDUFB9;NDUFB3;COX6C;UQCR11;NDUFA7;UQCC3;UQCRHL;SLC25A51;UQCRFS1;NDUFS8;NDUFS6;NDUFA3;NDUFA6;NDUFC1;NDUFB1;SDHAF2;NDUFA5;NDUFB4;NDUFV1	vascular
18	GO_Biological_Process_2023__Potassium Ion Transport (GO:0006813)	-0.426019	-3.20922	0	0	0	80/115	32.44%	KCNJ4;KCNG1;ABCC9;KCNK1;KCNJ11;KCNS1;KCNJ8;KCNS3;KCNK3;KCNQ4;KCNA3;SLC24A3;KCNF1;ATP1A2;KCNA4;SLC1A3;LRRC55;KCNK12;PKD2L1;KCNAB1;HCN3;KCNH3;ATP1A4;KCNA1;NALCN;KCNC1;KCNK2;KCNK13;KCNA5;ABCC8;KCNB1;KCNQ2;KCNJ6;SLC17A7;KCNK9;KCNH2;KCNJ12;KCNMB1;KCNH8;HCN1;HCN2;KCNA2;KCNV1;SLC24A2;KCNN1;KCNMB2;KCNQ3;KCNA6;SLC12A7;KCNK10;KCNC2;AQP1;KCNH6;KCNQ5;KCNH7;KCNMA1;SLC24A4;KCNJ3;KCNB2;KCNH1;KCND3;KCNS2;KCNJ16;…	vascular
19	GO_Molecular_Function_2023__Potassium Channel Activity (GO:0005267)	-0.48733	-3.195	0	0	0	55/71	32.73%	KCNG1;ABCC9;KCNK1;KCNJ11;KCNS3;KCNK3;KCNQ4;KCNF1;KCNA4;LRRC55;KCNK12;PKD2L1;HCN3;KCNH3;KCNA1;KCNC1;KCNK2;KCNK13;KCNQ2;KCNK9;KCNH2;KCNMB1;KCNH8;HCN1;HCN2;KCNA2;KCNV1;KCNN1;KCNMB2;KCNQ3;KCNA6;KCNT1;KCNK10;KCNC2;AQP1;KCNQ5;GRIK4;KCNMA1;GRIK3;KCND3;KCNS2;KCNU1;KCNK15;GRIK1;KCNG2;KCNK17;KCNK7;HCN4;KCNV2;KCNH5;GRIK2;KCNN4;CCDC51;KCND2;GRIK5	vascular
20	GO_Cellular_Component_2023__Potassium Channel Complex (GO:0034705)	-0.469336	-3.17688	0	0	0	58/77	32.73%	KCNJ4;KCNG1;ABCC9;KCNK1;KCNJ11;KCNS1;KCNJ8;KCNS3;KCNQ4;KCNA3;KCNF1;KCNA4;LRRC55;KCNAB1;KCNIP1;KCNA1;KCNC1;KCNIP3;KCNA5;ABCC8;KCNB1;KCNQ2;KCNJ6;KCNH2;KCNMB1;HCN2;KCNA2;KCNV1;KCNN1;KCNMB2;KCNQ3;KCNA6;KCNC2;KCNQ5;GRIK4;DPP10;KCNMA1;KCNJ3;KCNB2;GRIK3;KCNH1;KCND3;DPP6;KCNS2;KCNJ16;GRIK1;KCNG3;KCNG2;KCNAB2;KCNV2;KCNAB3;CNTNAP2;GRIK2;KCNN4;CCDC51;KCNIP4;KCND2;GRIK5	vascular
21	GO_Cellular_Component_2023__Postsynaptic Density Membrane (GO:0098839)	-0.611783	-3.17241	0	0	0	31/34	32.73%	SYNDIG1;GRID1;GRIN3A;GRIA4;CACNG3;CACNG4;GRID2;NETO1;CACNG8;GRIN2C;PTPRS;CACNG7;PLPPR4;GRIA1;CACNG5;GRIN2B;GRIK4;GRIA2;GRIN2A;CACNG2;GRIK3;GRM5;GRIK1;DLG4;GRM1;DLG3;GRIN2D;GRIA3;DAGLA;GRIK2;GRIK5	vascular
22	GO_Biological_Process_2023__Mitochondrial ATP Synthesis Coupled Electron Transport (GO:0042775)	-0.488716	-3.13671	0	0	0	51/68	35.30%	COX4I2;NDUFA4;NDUFS5;NDUFC2;CYC1;UQCRH;NDUFB10;NDUFS7;NDUFB8;COX8A;NDUFB7;NDUFB5;NDUFA1;COX5A;SDHD;COX6B1;COX7C;NDUFA8;COX6A1;COX5B;UQCR10;COX4I1;CYCS;COX7A2;NDUFS3;COA6;UQCRB;COX7B;NDUFB2;UQCRQ;NDUFAB1;NDUFA2;COX6A2;NDUFB9;NDUFB3;COX6C;UQCR11;NDUFA7;UQCC3;UQCRHL;UQCRFS1;NDUFS8;NDUFS6;NDUFA3;NDUFA6;NDUFC1;NDUFB1;SDHAF2;NDUFA5;NDUFB4;NDUFV1	vascular
23	GO_Cellular_Component_2023__Postsynaptic Density (GO:0014069)	-0.401695	-3.12782	0	0	0	95/149	32.89%	SHISA7;SRCIN1;CDK5R1;MAPK8IP2;SYNDIG1;FABP5;SHISA6;GAP43;GRID1;GRIN1;NEURL1;INSYN2B;CDK5;GRIN3A;TMEM108;RPS14;GRIA4;SLC8A2;RPS13;RPL30;CACNG3;INSYN1;CACNG4;IQSEC3;GRID2;AKAP5;RNF112;RPL7;RPS18;NETO1;ATP2B2;NLGN1;CACNG8;ARHGAP44;GRIN2C;ADD2;RPS25;PTPRS;SRGAP3;ADGRA1;SH2D5;NETO2;SAMD14;CACNG7;RPL12;SPOCK1;RPL8;SHANK1;ADCY8;RPL14;PLPPR4;GRIA1;CACNG5;GRIN2B;RGS14;GRIK4;SLC8A1;SLC8A3;GRIA2;RPL38;GRIN2…	vascular
24	GO_Biological_Process_2023__Mitochondrial Electron Transport, Cytochrome C To Oxygen (GO:0006123)	-0.799543	-3.1273	0	0	0	14/15	16.34%	COX4I2;NDUFA4;COX8A;COX5A;COX6B1;COX7C;COX6A1;COX5B;COX4I1;CYCS;COX7A2;COX7B;COX6A2;COX6C	vascular
25	GO_Biological_Process_2023__Macromolecule Biosynthetic Process (GO:0009059)	-0.387046	-3.11596	0	0	0	103/178	28.55%	EEF1A2;RPS14;RPL10;RPS23;RPS13;RPL19;RPL3;RPL30;EIF5A2;RPL9;FAU;RPS4X;MRPL36;RPS11;RPL36AL;B4GAT1;RPL29;RPS15;RPL10A;GAL3ST4;RPS27A;RPL7A;RPL7;RPS18;RPS3A;RPS9;RPL32;RPLP2;RPS4Y1;RPL27A;RPS25;RPL26;RPS16;RPS7;MRPL11;RPL34;INHBA;MRPL51;RPS28;RPS8;RPL39;GSPT2;MRPL41;RPL27;RPS21;APOE;ST3GAL4;INHA;RPS5;RPL12;RPL24;RPL15;RPL8;RPS15A;RPL14;RPL41;RPL18A;RPL18;RPS20;RPLP1;RPL13;MRPL43;RPS6;RPL13A;MRPS12;…	vascular
26	GO_Biological_Process_2023__Monoatomic Cation Transmembrane Transport (GO:0098655)	-0.352262	-3.10117	0	0	0	156/262	32.53%	TRPA1;SLC30A10;NOX5;SLC6A7;KCNG1;ABCC9;KCNK1;SCN2B;ATP1A3;KCNJ11;SLC6A12;KCNS1;CNGA1;SLC4A11;KCNJ8;KCNS3;KCNK3;TRPC3;ATP5PO;ATP1B1;SLC6A13;KCNQ4;KCNA3;SLC24A3;KCNF1;SLC6A1;SLC6A17;ATP1A2;CACNA1G;KCNA4;SLC30A8;SLC1A3;LRRC55;SLC6A15;TRPC4;GRIN1;SCN4B;KCNK12;ATP6V1F;SCARA5;PKD2L1;SLC4A8;HCN3;SLC8A2;KCNH3;ATP1A4;KCNA1;NALCN;KCNC1;KCNK2;KCNK13;KCNA5;ABCC8;CACNA1S;KCNB1;TRPV6;KCNQ2;SLC30A3;ATP6V0B;SCN3…	vascular
27	KEGG_2021_Human__Oxidative phosphorylation	-0.415498	-3.08548	0	0	0	69/115	28.88%	NDUFA4L2;COX4I2;ATP6V1G2;ATP5MC1;ATP5PO;NDUFA4;ATP5F1D;NDUFS5;ATP6V1F;ATP5MC3;NDUFC2;CYC1;UQCRH;NDUFB10;NDUFS7;NDUFB8;COX8A;NDUFB7;NDUFB5;NDUFA1;COX5A;ATP6V0B;SDHD;COX6B1;COX7C;NDUFB11;NDUFA8;COX6A1;COX5B;UQCR10;COX4I1;COX7A2;NDUFS3;NDUFA13;UQCRB;COX7B;NDUFB2;ATP5MG;UQCRQ;NDUFAB1;NDUFA2;ATP5PF;ATP5MF;COX6A2;NDUFB9;ATP6V0A4;NDUFB3;COX6C;NDUFA11;NDUFC2-KCTD14;ATP5PD;ATP5ME;ATP5F1E;UQCR11;NDUFA7;COX…	vascular
28	GO_Cellular_Component_2023__Dendrite (GO:0030425)	-0.350495	-3.07778	0	0	0	154/267	33.90%	THY1;PNOC;HTR1A;NSG1;CRHBP;NSG2;HTR1F;PENK;HTR2A;SRCIN1;CPNE6;KLHL1;GABRA1;GABRA5;CDK5R1;CHRM4;ADORA1;MME;CHRM1;CALB1;HRH3;CALB2;HRH2;GABRE;GRIN1;NEURL1;CDK5;DNER;SLC4A8;PRKAA2;HCN3;RGS8;SLC8A2;KCNA1;IL1RAPL1;GABRG2;PRKCG;MARK1;KCNC1;MAPT;FGF13;ELAVL4;PLK2;EPHB6;KIRREL3;KCNB1;EPHB3;AKAP5;CYP46A1;SPACDR;ZNF385A;NPFF;NLGN1;ARHGAP44;ADORA3;CHRM2;APOD;GABRA4;CHRNA4;HTR2C;PAK1;ANK3;PRSS12;VSTM5;SLC4A1…	vascular
29	WikiPathway_2023_Human__Oxidative Phosphorylation WP623	-0.509864	-3.0682	0	0	0	43/52	38.44%	NDUFA4L2;ATP5MC1;ATP5PO;NDUFA4;ATP5F1D;NDUFS5;ATP5MC3;NDUFC2;NDUFB10;NDUFS7;NDUFB8;NDUFB7;NDUFB5;NDUFA8;NDUFS3;NDUFB2;ATP5MG;NDUFAB1;NDUFA2;ATP5PF;ATP5MF;NDUFB9;NDUFA11;ATP5PD;ATP5ME;ATP5F1E;NDUFA7;ATP6AP1;ATP5F1A;GZMB;ATP5F1B;NDUFS8;ATP6AP2;NDUFS6;NDUFA3;NDUFA6;NDUFC1;NDUFB1;NDUFA5;NDUFB4;NDUFV1;ATP5PB;ATP5MC2	vascular
30	GO_Molecular_Function_2023__Voltage-Gated Monoatomic Cation Channel Activity (GO:0022843)	-0.459519	-3.06608	0	0	0	53/71	32.89%	KCNK1;KCNJ11;KCNS3;CACNA2D2;KCNQ4;KCNF1;CACNB2;KCNA4;LRRC55;HCN3;KCNH3;KCNA1;KCNC1;CACNG3;CACNG4;CACNA2D3;CACNA1S;KCNQ2;NCS1;CACNG8;KCNH2;CACNA1E;KCNH8;CACNA1F;CACNB1;HCN1;HCN2;KCNA2;CACNG7;KCNV1;CACNA2D4;KCNQ3;KCNA6;KCNC2;CACNA1I;CACNG5;KCNQ5;KCNMA1;CACNG2;KCND3;TMC2;KCNS2;CACNA1D;CACNA1B;KCNG2;OPRM1;HCN4;KCNV2;KCNH5;KCND2;CACNA1A;RYR1;CACNA2D1	vascular
31	KEGG_2021_Human__Protein digestion and absorption	-0.443129	-3.03766	0	0	0	64/87	33.98%	ATP1A3;COL12A1;COL4A4;COL24A1;COL4A3;COL6A3;ATP1B1;COL1A2;COL3A1;COL15A1;COL16A1;COL5A3;ATP1A2;DPP4;MME;COL6A2;COL9A1;COL6A1;COL9A2;CPB1;COL27A1;SLC3A1;SLC8A2;COL1A1;ATP1A4;XPNPEP2;COL20A1;COL4A5;CPB2;ATP1B2;COL21A1;COL13A1;KCNE3;ELN;COL9A3;COL23A1;FXYD2;COL25A1;CPA2;SLC8A1;SLC8A3;COL5A2;SLC7A8;COL11A1;COL2A1;COL19A1;SLC36A3;PRSS3;COL4A6;COL8A2;COL28A1;SLC16A10;COL22A1;SLC3A2;COL10A1;KCNJ13;COL26…	vascular
32	GO_Biological_Process_2023__Inorganic Cation Transmembrane Transport (GO:0098662)	-0.343498	-3.03407	0	0	0	154/262	32.53%	TRPA1;SLC30A10;NOX5;SLC6A7;KCNG1;ABCC9;KCNK1;SCN2B;ATP1A3;KCNJ11;SLC6A12;KCNS1;SLC4A11;KCNJ8;KCNS3;KCNK3;TRPC3;ATP5PO;ATP1B1;SLC6A13;KCNQ4;KCNA3;SLC24A3;KCNF1;RHCG;SLC6A1;SLC6A17;ATP1A2;CACNA1G;P2RX3;KCNA4;SLC30A8;SLC1A3;LRRC55;SLC6A15;TRPC4;SCN4B;KCNK12;ATP6V1F;SCARA5;PKD2L1;SLC4A8;HCN3;SLC8A2;KCNH3;ATP1A4;KCNA1;NALCN;KCNC1;KCNK2;KCNK13;KCNA5;ABCC8;CACNA1S;KCNB1;TRPV6;KCNQ2;CACNA1H;SLC30A3;ATP6V…	vascular
33	GO_Cellular_Component_2023__Voltage-Gated Potassium Channel Complex (GO:0008076)	-0.461058	-3.03024	0	0	0	51/70	30.89%	KCNJ4;KCNG1;KCNK1;KCNS1;KCNJ8;KCNS3;KCNQ4;KCNA3;KCNF1;KCNA4;LRRC55;KCNAB1;HCN3;KCNIP1;KCNA1;KCNC1;KCNIP3;KCNA5;KCNB1;KCNQ2;KCNJ6;KCNH2;KCNMB1;HCN1;HCN2;KCNA2;KCNV1;KCNN1;KCNMB2;KCNQ3;KCNA6;KCNC2;KCNQ5;DPP10;KCNMA1;KCNJ3;KCNB2;KCNH1;KCND3;DPP6;KCNS2;KCNJ16;KCNG3;KCNG2;KCNAB2;HCN4;KCNV2;KCNAB3;CNTNAP2;KCNN4;KCNIP4	vascular
34	GO_Biological_Process_2023__Regulation Of Neurotransmitter Receptor Activity (GO:0099601)	-0.550293	-3.02353	0	0	0	30/40	28.89%	CRH;CRHBP;SHISA7;MAPK8IP2;SHISA6;NPTX2;NPTXR;NPTX1;CACNG3;CACNG4;BEGAIN;DAPK1;NETO1;NLGN1;CACNG8;CACNG7;SHANK1;DLGAP3;LYNX1;CACNG5;CACNG2;GSG1L;DLG4;SHISA8;SHISA9;DLGAP2;OPRM1;PRRT1;RELN;DLGAP1	vascular
35	GO_Cellular_Component_2023__Ionotropic Glutamate Receptor Complex (GO:0008328)	-0.591246	-3.02276	0	0	0	29/33	32.73%	SHISA7;SHISA6;GRIN1;GRIN3A;GRIA4;CACNG3;CACNG4;GRID2;VWC2;CACNG8;GRIN2C;CACNG7;VWC2L;GRIA1;CACNG5;GRIN2B;GRIK4;GRIA2;GRIN2A;GRIK3;OLFM2;GRIK1;DLG4;SHISA8;SHISA9;GRIN2D;GRIA3;GRIK2;GRIK5	vascular
36	GO_Cellular_Component_2023__Axon (GO:0030424)	-0.361997	-3.00417	0	0	0	110/199	29.90%	RAB3A;CCK;GRM3;SYT4;ATP1A3;L1CAM;SRCIN1;CPNE6;NEFL;CDK5R1;KCNA3;OLFM1;SLC6A1;LRRTM1;NTRK3;SYT5;MME;KCNA4;CALB1;FEZ1;CNTN4;ATP2B3;CNTN2;CDK5;TMEM108;PTK7;PRKAA2;HCN3;RTN4RL2;SLC8A2;NTRK1;NEFM;KCNC1;NELL2;MAPT;FGF13;ELAVL4;CNTN1;NEFH;KIRREL3;KCNB1;SYT1;CLDN11;ALDH1A1;SHTN1;CNTN6;PAK1;CCSAP;PRSS12;VSTM5;PTPRS;DSCAML1;HCN1;HCN2;SCN9A;SNCA;CIB1;KCNA2;ADCY8;UNC80;KIF1A;KCNC2;CTNNA2;NFASC;EPHA5;CNTN5;SC…	vascular
37	GO_Cellular_Component_2023__Ribosome (GO:0005840)	-0.496682	-3.00353	0	0	0	38/59	25.00%	RPS23;RPS13;RPL19;RPL30;RPL9;RPS4X;RPS11;RPL36AL;RPL10A;RPL7A;RPS18;RPS9;RPL32;RPS25;RPS7;RPS28;RPL39;RPL27;RPS21;RPS5;RPL24;RPL15;RPL8;RPL41;RPL18A;RPL18;RPL13A;MRPS12;RPL11;RPL38;NR0B1;RPS26;RPS3;RPS10;RPL36;RPL6;BTF3;RPS27	vascular
38	GO_Cellular_Component_2023__Polysomal Ribosome (GO:0042788)	-0.624532	-3.00296	0	0	0	21/28	22.43%	RPS23;RPL19;RPL30;RPL36AL;RPL10A;RPL7A;RPL32;RPS28;RPL39;RPS21;RPL24;RPL8;RPL41;RPL18A;RPL18;RPL11;RPL38;NR0B1;RPS26;RPL36;RPL6	vascular
39	GO_Molecular_Function_2023__Voltage-Gated Potassium Channel Activity (GO:0005249)	-0.450656	-3.00156	0	0	0	47/74	23.71%	KCNJ4;KCNG1;KCNK1;KCNJ11;KCNS1;KCNJ8;KCNS3;KCNE4;KCNQ4;KCNA3;KCNF1;KCNA4;LRRC55;KCNJ9;HCN3;KCNH3;KCNA1;KCNC1;KCNK2;KCNA5;KCNB1;KCNQ2;KCNJ6;KCNH2;KCNJ12;KCNE3;KCNH8;HCN2;KCNA2;KCNV1;KCNN1;KCNQ3;KCNA6;KCNT1;KCNC2;KCNH6;KCNQ5;KCNH7;KCNMA1;KCNJ3;KCNB2;KCNH1;KCND3;KCNS2;KCNJ16;KCNG3;KCNG2	vascular
40	GO_Molecular_Function_2023__Oxidoreduction-Driven Active Transmembrane Transporter Activity (GO:0015453)	-0.496158	-2.99085	0	0	0	41/53	35.30%	COX4I2;NDUFA4;NDUFS5;NDUFC2;UQCRH;NDUFB10;NDUFS7;NDUFB8;COX8A;NDUFB7;NDUFB5;NDUFA1;COX5A;COX6B1;COX7C;NDUFA8;COX5B;UQCR10;COX4I1;NDUFS3;UQCRB;COX7B;NDUFB2;NDUFA2;NDUFB9;NDUFB3;NDUFA7;COX7A1;UQCRHL;COX7A2L;NDUFS8;NDUFS6;NDUFA3;NDUFA6;NDUFC1;NDUFB1;CYB561D2;CYBRD1;NDUFA5;NDUFB4;NDUFV1	vascular
41	GO_Biological_Process_2023__Potassium Ion Transmembrane Transport (GO:0071805)	-0.385453	-2.97638	0	0	0	71/127	24.26%	KCNJ4;KCNG1;ABCC9;KCNK1;ATP1A3;KCNJ11;KCNS1;KCNJ8;KCNS3;KCNK3;KCNE4;ATP1B1;KCNQ4;KCNA3;SLC24A3;KCNF1;ATP1A2;KCNA4;SLC1A3;LRRC55;KCNJ9;KCNK12;PKD2L1;HCN3;KCNH3;ATP1A4;KCNA1;NALCN;KCNC1;KCNK2;KCNK13;KCNA5;ABCC8;KCNB1;SLC12A5;ATP1B2;KCNQ2;KCNJ6;KCNK9;KCNH2;KCNJ12;KCNE3;KCNH8;HCN1;HCN2;KCNA2;KCNV1;SLC24A2;KCNN1;KCNQ3;KCNA6;SLC12A7;KCNK10;KCNC2;FXYD2;KCNH6;KCNQ5;KCNH7;SLC24A4;KCNJ3;KCNB2;KCNH1;KCND3;S…	vascular
42	GO_Cellular_Component_2023__Mitochondrial Respiratory Chain Complex IV (GO:0005751)	-0.755244	-2.97031	0	0	0	14/16	16.34%	NDUFA4L2;COX4I2;NDUFA4;COX8A;COX5A;COX6B1;COX7C;COX6A1;COX5B;COX4I1;COX7A2;COX7B;COX6A2;COX6C	vascular
43	KEGG_2021_Human__TNF signaling pathway	0.294617	2.92404	0	0.00440137	0.003	50/109	21.19%	IL6;PTGS2;IL18R1;SELE;CXCL1;CXCL2;EDN1;PIK3R3;CREB3L3;MLKL;MAP3K8;CXCL3;SOCS3;VCAM1;VEGFD;MAPK13;CREB5;MAPK11;VEGFC;BCL3;ICAM1;NOD2;TRAF1;LTA;CASP10;CASP8;TNFAIP3;TRADD;DAB2IP;IL15;CFLAR;CSF1;BIRC3;MAP3K5;FAS;RPS6KA4;JAG1;MAP2K3;IKBKB;CREB3L4;RPS6KA5;TNFRSF1A;TRAF2;CASP7;MAP3K14;MMP14;MAPK14;TNFRSF1B;TAB1;CASP3	vascular
44	GO_Molecular_Function_2023__Transmitter-Gated Monoatomic Ion Channel Activity (GO:0022824)	-0.545118	-2.90869	0	0	0	32/37	33.87%	GABRA1;GABRA5;GLRA2;GRID1;GABRE;GRIN3A;GRIA4;GABRG2;GRID2;GABRA4;GRIN2C;GABRB2;GLRA3;GRIA1;GABRA6;GRIN2B;GRIK4;GRIA2;GRIN2A;GABRG3;GRIK3;GRIK1;GABRB3;CHRNB1;GABRB1;GABRG1;GRIN2D;GRIA3;HTR3C;GRIK2;GRIK5;GABRA2	vascular
45	GO_Cellular_Component_2023__Glutamatergic Synapse (GO:0098978)	-0.431881	-2.90415	0	0	0	45/77	24.75%	RAC3;SHISA7;SRCIN1;SHISA6;SPTB;SLITRK2;ATP2B3;SLITRK1;ARHGAP22;NPTX2;SH3GL3;NPTXR;SLC4A8;NLGN4Y;IL1RAPL1;NPTX1;NELL2;WNT7A;LRRTM3;LRRC4B;SLITRK4;ATP2B2;NLGN1;WNT5A;LRRC4;IL1RAPL2;NRG3;ADGRA1;APOE;LRFN5;DLGAP3;PIN1;NLGN4X;CADPS;CACNG5;PTPRD;PTPRO;BSN;LRRC4C;SH3GL2;NLGN3;HRAS;ACTB;DLGAP2;PCLO	vascular
46	GO_Molecular_Function_2023__Taste Receptor Activity (GO:0008527)	0.609127	2.90047	0	0.00513493	0.007	13/16	18.97%	TAS2R5;TAS2R43;TAS2R50;TAS2R3;TAS1R1;TAS2R19;TAS2R30;TAS2R10;TAS2R13;TAS2R46;TAS2R20;TAS2R14;TAS2R4	vascular
47	GO_Cellular_Component_2023__GABA-ergic Synapse (GO:0098982)	-0.679428	-2.89174	0	0	0	16/19	19.83%	CBLN4;LRRTM1;SLITRK2;ATP2B3;SLITRK1;NLGN4Y;ATP2B2;NLGN1;MDGA1;LRRTM2;LRFN5;NLGN4X;PTPRO;BSN;SLITRK3;NLGN3	vascular
48	GO_Cellular_Component_2023__Collagen-Containing Extracellular Matrix (GO:0062023)	-0.323724	-2.88115	0	0	0	210/332	36.00%	CBLN4;LUM;SMOC2;SERPINF1;IGFBPL1;ANGPT1;PCSK6;THBS2;L1CAM;MXRA5;COL12A1;ADAMTS4;COL4A4;FBLN1;COL24A1;COL4A3;POSTN;ASPN;COL6A3;THBS1;DCN;CSPG4;ZP1;COL1A2;COL3A1;SOD3;COL15A1;APLP1;RARRES2;COL16A1;COL5A3;NDP;COL6A2;PRELP;FREM1;LGALS1;EDIL3;LTBP4;CCDC80;NPPA;COCH;MGP;COL9A1;LOXL1;SDC2;C1QA;CILP;COL6A1;TNC;COL9A2;EMILIN1;FBLN5;S100A4;CHADL;C1QC;COL27A1;FMOD;COL1A1;MFAP2;TGFBI;SFRP1;HAPLN1;MATN1;F12;C…	vascular
49	GO_Biological_Process_2023__Metal Ion Transport (GO:0030001)	-0.356507	-2.8679	0	0	0	96/158	32.89%	CLDN16;KCNJ4;KCNG1;KCNK1;KCNS1;SLC4A11;KCNJ8;KCNS3;KCNK3;TRPC3;KCNQ4;KCNA3;SLN;KCNF1;ATP1A2;KCNA4;RAMP2;SCN7A;NIPAL4;TRPC4;SCN4B;GRIN3A;KCNAB1;CCL5;KCNH3;ATP1A4;KCNA1;KCNC1;SCN1A;FGF13;CACNG3;KCNA5;CACNA1S;CAMK2A;TRPV6;KCNJ6;SLC17A7;RAMP1;SCN3B;KCNK9;ATP2B2;CACNG8;CHRNA4;KCNJ12;RYR3;KCNMB1;ASIC1;SCN9A;KCNA2;CHRNB2;CACNG7;KCNV1;KCNN1;KCNMB2;KCNA6;AQP1;NMUR1;SLC5A6;TPT1;SCNN1D;SCN8A;RYR2;KCNMA1;KCN…	vascular
50	GO_Biological_Process_2023__Regulation Of Catecholamine Secretion (GO:0050433)	-0.616478	-2.86205	0	0	0	20/25	25.22%	SYT4;SYT13;STX1A;SYT5;HRH3;SYT15;FGF20;KCNB1;SYT1;CHRNA4;SYT9;SNCA;KCNA2;CHRNB2;SYT10;SYT6;SYT17;SYT3;SYT2;SYT7	vascular
51	KEGG_2021_Human__Nicotine addiction	-0.516975	-2.85836	0	0	0	31/40	28.60%	GABRD;GABRA1;GABRA5;SLC17A8;GABRE;GRIN1;GRIN3A;GRIA4;GABRG2;SLC17A6;SLC17A7;GABRA4;CHRNA4;GRIN2C;CHRNB2;GABRB2;GABRQ;GRIA1;GABRA6;GRIN2B;SLC32A1;GRIA2;GRIN2A;GABRG3;CHRNA7;GABRB3;CACNA1B;GABRB1;GABRG1;GRIN2D;GRIA3	vascular
52	GO_Biological_Process_2023__Neuron Projection Morphogenesis (GO:0048812)	-0.372198	-2.85625	0	0	0	78/141	29.44%	RAB3A;CCK;TUNAR;MAPK8IP2;APLP1;DOCK10;ZNF365;SLITRK2;CNTN4;SLITRK5;SLITRK1;CDK5;SDC2;GAS7;PACSIN1;GPM6A;WNT7A;FGFR2;ATL1;NEFH;CELSR2;EPHB3;SLITRK4;SPACDR;S100B;NLGN1;NYAP2;TNIK;SHTN1;PAK1;CNTNAP1;ANK3;TRIM46;UBB;NTNG2;SRGAP3;DSCAML1;S100A6;PAX2;EPB41L3;SHANK1;NYAP1;BRSK1;CTNNA2;NBL1;PLPPR4;MYO16;PAK3;FLRT3;NCKAP1L;MAP1A;DCC;CTNND2;SLITRK3;EPHB1;NTNG1;SSNA1;MNX1;NRCAM;LRP4;NRN1;DLG4;DCDC2;TNN;ALCA…	vascular
53	GO_Biological_Process_2023__Cell Morphogenesis Involved In Neuron Differentiation (GO:0048667)	-0.432459	-2.84504	0	0	0	45/74	29.08%	RAB3A;CCK;MAPK8IP2;APLP1;SLITRK2;CNTN4;SLITRK5;SLITRK1;CDK5;SDC2;WNT7A;FGFR2;ATL1;NEFH;CDHR1;CELSR2;SLITRK4;S100B;SHTN1;ANK3;TRIM46;NTNG2;DSCAML1;S100A6;PAX2;BRSK1;CTNNA2;PLPPR4;PAK3;MAP1A;DCC;SLITRK3;NTNG1;SSNA1;NRCAM;LRP4;DCDC2;SPTBN4;ADGRB1;BRSK2;MAP6;MAP1B;MFSD2A;SLITRK6;LLGL1	vascular
54	GO_Cellular_Component_2023__Respiratory Chain Complex IV (GO:0045277)	-0.707948	-2.84352	0	0	0	14/17	16.34%	NDUFA4L2;COX4I2;NDUFA4;COX8A;COX5A;COX6B1;COX7C;COX6A1;COX5B;COX4I1;COX7A2;COX7B;COX6A2;COX6C	vascular
55	GO_Biological_Process_2023__Proton Motive Force-Driven ATP Synthesis (GO:0015986)	-0.448217	-2.84127	0	0	0	38/59	28.88%	ATP5MC1;ATP5PO;ATP5F1D;NDUFS5;ATP5MC3;NDUFC2;NDUFB10;NDUFS7;NDUFB8;NDUFB7;NDUFB5;NDUFA1;SDHD;NDUFB11;NDUFA8;NDUFS3;NDUFA13;NDUFB2;ATP5MJ;ATP5MG;NDUFAB1;NDUFA2;ATP5PF;ATP5MF;NDUFB9;NDUFB3;NDUFA11;ATP5MK;ATP5PD;ATP5ME;ATP5F1E;NDUFA7;ATP5F1B;NDUFS8;NDUFS6;NDUFA3;NDUFA6;NDUFC1	vascular
56	GO_Biological_Process_2023__Proton Motive Force-Driven Mitochondrial ATP Synthesis (GO:0042776)	-0.468836	-2.84029	0	0	0	38/52	35.30%	ATP5PO;ATP5F1D;NDUFS5;NDUFC2;NDUFB10;NDUFS7;NDUFB8;NDUFB7;NDUFB5;NDUFA1;SDHD;NDUFB11;NDUFA8;NDUFS3;NDUFA13;NDUFB2;ATP5MG;NDUFAB1;NDUFA2;ATP5PF;ATP5MF;NDUFB9;NDUFB3;NDUFA11;ATP5PD;ATP5ME;ATP5F1E;NDUFA7;ATP5F1B;NDUFS8;NDUFS6;NDUFA3;NDUFA6;NDUFC1;NDUFB1;NDUFA5;NDUFB4;NDUFV1	vascular
57	WikiPathway_2023_Human__GPCRs Class A Rhodopsin Like WP455	-0.350062	-2.82472	0	0	0	101/185	25.10%	CX3CR1;AVPR1A;PTGDR2;HTR1A;P2RY14;NPY5R;P2RY13;HTR1F;HTR2A;OR7C1;P2RY12;EDNRA;CYSLTR2;ADORA2B;GPR85;CHRM4;GPR37;GPR39;ADORA1;CHRM1;GPR173;DRD1;ADRA2A;PTGER1;TBXA2R;HRH3;HRH2;CCKBR;AGTR1;GPR65;SSTR2;MC4R;GPR174;FSHR;GPR83;GALR1;NPY1R;CXCR5;GPR18;ADRA2B;ADRA1A;GPR27;GPR3;ADORA2A;ADORA3;ADRA1B;CHRM2;HTR2C;NTSR1;SSTR3;OR1F1;PTGER4;PTGFR;CCR10;CNR1;GPR17;HTR5A;C3AR1;LPAR4;HTR7;CMKLR1;F2RL2;GPR12;MAS1;…	vascular
58	GO_Biological_Process_2023__Golgi Organization (GO:0007030)	0.266306	2.81273	0	0.00537945	0.011	100/117	53.24%	GOLGA8Q;FHDC1;SEC16B;ATP8B3;TMED3;SYNE1;ZFP69B;TMED6;USP6NL;YIPF7;ATP8B2;PLK3;VTI1A;PI4K2B;BET1;ATP8B1;CDC42;COG7;CSNK1D;CSNK1A1;PRKD1;PLEKHM2;VPS51;TRAPPC12;GAK;GOLPH3L;DYM;GORASP1;ARHGEF7;VMP1;COG2;ZW10;NPLOC4;GBF1;UBXN2A;TRAPPC11;GOLGA5;TMED10;VPS13B;COG3;COG5;HTT;COG6;HACE1;BCAS3;RAB1A;GOLPH3;TRAPPC8;CLASP1;SEC23IP;TRIP11;RAB2A;STX17;YIPF4;ATL2;GOLGB1;TMED5;CLASP2;RAB30;SEC22B;PDCD10;GORASP2;…	vascular
59	GO_Biological_Process_2023__Oxidative Phosphorylation (GO:0006119)	-0.447356	-2.80914	0	0	0	38/60	28.88%	ATP5PO;CHCHD10;ATP5F1D;NDUFS5;NDUFC2;UQCRH;NDUFB10;NDUFS7;NDUFB8;NDUFB7;NDUFB5;NDUFA1;SDHD;NDUFB11;NDUFA8;NDUFS3;NDUFA13;UQCRB;NDUFB2;ATP5MG;NDUFAB1;NDUFA2;ATP5PF;ATP5MF;NDUFB9;NDUFB3;NDUFA11;ATP5PD;ATP5ME;ATP5F1E;NDUFA7;SLC25A51;ATP5F1B;NDUFS8;NDUFS6;NDUFA3;NDUFA6;NDUFC1	vascular
60	GO_Biological_Process_2023__Axonogenesis (GO:0007409)	-0.343012	-2.7798	0	0	0	104/180	32.55%	RAB3A;CCK;NOTCH3;L1CAM;CDK5R1;APLP1;EFNA3;SEMA3D;SEMA3C;SLITRK2;SEMA5A;FEZ1;CNTN4;CNTN2;SLITRK5;SLITRK1;CDK5;SEMA4D;SEMA3G;NELL2;UNC5C;WNT7A;CNTN1;LGR6;FGFR2;ATL1;PLEKHG4;EFNA5;NEFH;EPHB6;EPHB3;SLIT2;LRTM1;SLITRK4;S100B;DPYSL5;WNT5A;SHTN1;CNTN6;ANK3;KIF5C;TRIM46;SEMA6D;NTNG2;ARHGEF25;SEMA5B;DSCAML1;S100A6;CXCL12;TNR;PAX2;ANOS1;LGI1;BRSK1;CTNNA2;NFASC;HSP90AB1;PLPPR4;CYFIP2;EPHA5;CNTN5;EMB;SEMA3A;…	vascular
61	GO_Biological_Process_2023__Regulation Of Monoatomic Ion Transmembrane Transporter Activity (GO:0032412)	-0.432323	-2.77528	0	0	0	41/66	28.10%	CRH;FXYD7;CRHBP;SHISA7;SCN2B;MAPK8IP2;SHISA6;SCN4B;HCN3;CACNG3;CACNG4;FXYD1;DAPK1;SCN3B;NLGN1;CACNG8;FXYD6;ANK2;HCN1;HCN2;TRPC6;CACNG7;PTPN3;SHANK1;YWHAH;CACNG5;FXYD2;CACNG2;PHB2;SCN1B;GSG1L;CACNA1D;PPIF;DLG4;SHISA8;SHISA9;OPRM1;HCN4;CHRM3;PRRT1;RELN	vascular
62	GO_Molecular_Function_2023__Neuropeptide Receptor Activity (GO:0008188)	-0.549028	-2.77118	0	0	0	26/30	33.63%	NPY5R;GPR37;NPSR1;SSTR2;TACR3;GPR83;GALR1;NPY1R;SORCS1;NTSR1;SORCS3;NMUR1;TACR1;MCHR1;GPR171;GRPR;NTSR2;NMUR2;GAL;SORCS2;NPFFR1;SSTR1;OPRM1;NMBR;NPY2R;KISS1R	vascular
63	GO_Molecular_Function_2023__G Protein-Coupled Receptor Activity (GO:0004930)	-0.335255	-2.7708	0	0	0	128/203	34.55%	GRM3;CX3CR1;GRM8;GPR62;PTGDR2;P2RY14;PTH1R;P2RY13;P2RY12;CYSLTR2;GPR149;PDGFRB;ADORA2B;ADGRD1;ADCYAP1R1;GPR85;GPR37;NPY;GPR39;ADORA1;GPR173;S1PR3;DRD1;GPR150;LGR5;S1PR4;MRGPRF;ADGRE2;GPR65;LPAR1;GPR174;GABBR1;GNRHR;RXFP1;GPR83;GPR88;GALR1;GPR61;CXCR5;GPR18;S1PR2;LGR6;GPR27;GABBR2;CELSR2;GPR176;ELOVL4;GPR26;ADGRB2;ADORA2A;MCHR2;ADORA3;ADGRB3;LTB4R2;LPAR3;NTSR1;GHRHR;SSTR3;ADGRA1;GRM4;CNR1;GPR17;C3…	vascular
64	GO_Biological_Process_2023__Extracellular Structure Organization (GO:0043062)	-0.393243	-2.77055	0	0	0	60/95	28.76%	MMP15;SMOC2;ADAMTS4;COL24A1;COL4A3;POSTN;COL1A2;COL3A1;COL15A1;APLP1;COL16A1;COL5A3;CCDC80;ECM2;ADAMTS5;COL9A1;COL9A2;ADAMTS15;COL1A1;TGFBI;ADAMTS7;MATN1;COL4A5;HPSE2;VIT;ADAMTS16;COL13A1;MMP17;MATN2;ADAMTS18;MMP26;MMP16;MMP11;PXDN;COL9A3;SPINT1;SPINK5;COL23A1;NDNF;ADAMTS8;ADAMTS20;NPNT;COL5A2;ADAMTS2;COL11A1;SMOC1;COL19A1;MMP19;ADAMTS19;COL4A6;COL8A2;COL28A1;COLQ;COL22A1;SPOCK2;COL10A1;ADAMTS17;…	vascular
65	MSigDB_Hallmark_2020__Epithelial Mesenchymal Transition	-0.332748	-2.75578	0	0	0	105/195	26.96%	THY1;RGS4;LUM;SFRP4;SNAI2;THBS2;MXRA5;COL12A1;PDGFRB;FBLN1;POSTN;SCG2;COL6A3;THBS1;SNTB1;DCN;SPP1;COL1A2;COL3A1;APLP1;COL16A1;CD44;COL5A3;DKK1;PCOLCE2;COL6A2;SLIT3;LGALS1;PFN2;EDIL3;ECM2;GEM;MGP;MYL9;TAGLN;LOXL1;TNC;FBLN5;FMOD;FOXC2;PRRX1;COL1A1;CDH6;TGFBI;SFRP1;IGFBP2;ANPEP;NT5E;FAP;SLIT2;LRP1;NTM;BGN;LAMA2;WNT5A;MATN2;GREM1;ADAM12;INHBA;BASP1;ELN;SGCG;CCN1;LAMA1;CXCL12;JUN;DPYSL3;SPOCK1;VCAN;MF…	vascular
66	GO_Cellular_Component_2023__Mitochondrial Respiratory Chain Complex I (GO:0005747)	-0.490135	-2.7476	0	0	0	31/41	35.30%	NDUFA4;NDUFS5;NDUFC2;NDUFB10;NDUFS7;NDUFB8;NDUFB7;NDUFB5;NDUFA1;WDR93;NDUFB11;NDUFA8;NDUFS3;NDUFA13;NDUFB2;NDUFAB1;NDUFA2;NDUFB9;NDUFB3;NDUFA11;NDUFC2-KCTD14;NDUFA7;NDUFS8;NDUFS6;NDUFA3;NDUFA6;NDUFC1;NDUFB1;NDUFA5;NDUFB4;NDUFV1	vascular
67	GO_Cellular_Component_2023__Respiratory Chain Complex I (GO:0045271)	-0.490135	-2.7476	0	0	0	31/41	35.30%	NDUFA4;NDUFS5;NDUFC2;NDUFB10;NDUFS7;NDUFB8;NDUFB7;NDUFB5;NDUFA1;WDR93;NDUFB11;NDUFA8;NDUFS3;NDUFA13;NDUFB2;NDUFAB1;NDUFA2;NDUFB9;NDUFB3;NDUFA11;NDUFC2-KCTD14;NDUFA7;NDUFS8;NDUFS6;NDUFA3;NDUFA6;NDUFC1;NDUFB1;NDUFA5;NDUFB4;NDUFV1	vascular
68	GO_Biological_Process_2023__Positive Regulation Of Synaptic Transmission (GO:0050806)	-0.417379	-2.74726	0	0	0	47/74	30.54%	STX1B;SHISA7;RIMS4;DRD1;GRIN1;SLC8A2;NMU;NALCN;CCL2;CACNG3;CACNG4;PLK2;AKAP5;VAMP2;SYT1;NLGN1;CACNG8;GRIN2C;CACNG7;SLC24A2;ADCY8;LGI1;CACNG5;GRIN2B;RGS14;SLC8A3;GRIN2A;PRKCZ;CACNG2;GPER1;RIMS3;NFATC4;CHRNA7;CLSTN2;NLGN3;ZDHHC12;BAIAP3;DLG4;APEX1;EPHB2;RIMS1;ADRA1D;GRIN2D;RELN;NRXN1;SHANK2;GRIK2	vascular
69	GO_Biological_Process_2023__Translation (GO:0006412)	-0.32453	-2.73751	0	0	0	110/229	26.44%	EEF1A2;RPS14;RPL10;RPS23;RPS13;RPL19;RPL3;RPL30;EIF5A2;RPL9;FAU;RPS4X;MRPL36;RPS11;RPL36AL;RPL29;RPS15;RPL10A;RPS27A;RPL7A;RPL7;RPS18;RPS3A;RPS9;RPL32;RPLP2;RPS4Y1;AURKAIP1;RPL27A;RPS25;RPL26;RPS16;RPS7;MRPL11;RPL34;MRPL51;RPS28;MRPS34;RPS8;GADD45GIP1;RPL39;GSPT2;MRPL41;RPL27;RPS21;RPS5;RPL12;MRPL40;RPL24;RPL15;RPL8;RPS15A;RPL14;RPL41;RPL18A;UBA52;RPL18;RPS20;RPLP1;RPL13;MRPL43;RPS6;RPL13A;MRPS12…	vascular
70	GO_Biological_Process_2023__Regulation Of Calcium Ion-Dependent Exocytosis (GO:0017158)	-0.57847	-2.73076	0	0	0	20/27	25.22%	SYT4;SYT13;STX1A;SYT5;SYT15;CBARP;KCNB1;TRPV6;SCAMP5;SYT1;RPH3A;SYT9;SYT10;SYT6;DOC2A;SYT17;SYT3;BAIAP3;SYT2;SYT7	vascular
71	GO_Biological_Process_2023__External Encapsulating Structure Organization (GO:0045229)	-0.386625	-2.72974	0	0	0	58/95	27.42%	MMP15;SMOC2;ADAMTS4;COL24A1;COL4A3;POSTN;COL1A2;COL3A1;COL15A1;APLP1;COL16A1;COL5A3;CCDC80;ECM2;ADAMTS5;COL9A1;COL9A2;ADAMTS15;COL1A1;TGFBI;ADAMTS7;MATN1;COL4A5;HPSE2;VIT;ADAMTS16;COL13A1;MMP17;MATN2;ADAMTS18;MMP26;MMP16;MMP11;PXDN;COL9A3;SPINT1;SPINK5;COL23A1;NDNF;ADAMTS8;ADAMTS20;NPNT;COL5A2;ADAMTS2;COL11A1;SMOC1;COL19A1;MMP19;ADAMTS19;COL4A6;COL8A2;COL28A1;COLQ;COL22A1;SPOCK2;COL10A1;ADAMTS17;…	vascular
72	GO_Cellular_Component_2023__Excitatory Synapse (GO:0060076)	-0.59448	-2.72641	0	0	0	19/24	23.33%	SHISA7;SYNDIG1;SHISA6;SLC17A8;ATP2B3;GRIN1;NLGN4Y;FGFR2;SLC17A6;AKAP5;SLC17A7;NETO1;NLGN1;SHANK1;NLGN4X;GRIA2;BSN;NLGN3;DLG4	vascular
73	KEGG_2021_Human__Calcium signaling pathway	-0.322223	-2.71492	0	0	0	135/223	35.25%	AVPR1A;PLCE1;CASQ1;HTR2A;EDNRA;CYSLTR2;PDGFRB;ITPKA;ADORA2B;CD38;P2RX5;CALM3;CASQ2;NTRK3;PDGFRA;CACNA1G;FGF1;P2RX3;CHRM1;DRD1;PTGER1;HRC;TBXA2R;HRH2;ATP2B3;CCKBR;AGTR1;GRIN1;FGF9;MET;MYLK2;TACR3;CALML4;SLC8A2;NTRK1;NOS2;PRKCG;FGF20;PDE1A;ADRA1A;FGFR2;CALM1;CACNA1S;CAMK2A;ADCY1;CALM2;CACNA1H;PDGFD;SLC25A4;SLC25A5;PDE1C;ADORA2A;ATP2B2;HGF;ADRA1B;CHRM2;HTR2C;LTB4R2;RYR3;GRIN2C;CAMK2B;NTSR1;CACNA1E;C…	vascular
74	GO_Cellular_Component_2023__AMPA Glutamate Receptor Complex (GO:0032281)	-0.653825	-2.70269	0	0	0	17/19	28.60%	SHISA7;SHISA6;GRIA4;CACNG3;CACNG4;VWC2;CACNG8;CACNG7;VWC2L;GRIA1;CACNG5;GRIA2;OLFM2;DLG4;SHISA8;SHISA9;GRIA3	vascular
75	KEGG_2021_Human__Retrograde endocannabinoid signaling	-0.348251	-2.6961	0	0	0	80/140	30.58%	GNG3;GABRD;NDUFA4L2;GNG2;GABRA1;GABRA5;ADCY5;NDUFA4;SLC17A8;GABRE;KCNJ9;GNG8;NDUFS5;GNB3;NDUFC2;GRIA4;GABRG2;PRKCG;MAPK10;GNGT1;NDUFB10;NDUFS7;NDUFB8;NDUFB7;NDUFB5;CACNA1S;ADCY1;SLC17A6;NDUFA1;KCNJ6;SLC17A7;NDUFB11;NDUFA8;GABRA4;GNG13;NDUFS3;NDUFA13;GNAO1;CACNA1F;NDUFB2;CNR1;GNAI1;NDUFAB1;GABRB2;ADCY8;NDUFA2;GABRQ;NDUFB9;NDUFB3;PLCB2;GRIA1;GABRA6;NDUFA11;NDUFC2-KCTD14;SLC32A1;GRIA2;GABRG3;KCNJ3;N…	vascular
76	GO_Molecular_Function_2023__Receptor Ligand Activity (GO:0048018)	-0.319853	-2.696	0	0	0	151/228	38.11%	SST;CRH;CCK;VGF;IGF1;CHGB;EDN3;CD86;PTN;DKK1;NDP;BMP2;DPP4;SEMA3D;FGF1;WNT16;SEMA3C;SEMA5A;APLN;WNT6;NPPA;CCL4;FGF9;CCL26;SEMA4D;S100A4;CCL5;IL33;GPNMB;IGF2;CLEC11A;SEMA3G;IL17D;LIF;GDF7;FGF20;EDA;WNT7A;WNT10B;THPO;CXCL10;NODAL;IL34;TNFSF12;PGLYRP1;HSPA1A;CSPG5;WNT10A;SCGB3A1;BMP4;HGF;WNT5A;DLL4;NRG4;GREM1;WNT2;SEMA6D;INHBA;NRG3;SEMA5B;C1QTNF12;BTC;BMP8A;IL1B;NPPC;INHA;NMB;FGF10;TDGF1;POMC;TAFA4;…	vascular
77	GO_Biological_Process_2023__Cellular Respiration (GO:0045333)	-0.389118	-2.69576	0	0	0	54/84	35.30%	COX4I2;NDUFA4;NDUFS5;NDUFC2;CYC1;UQCRH;NDUFB10;NDUFS7;NDUFB8;COX8A;NDUFB7;NDUFB5;NDUFA1;COX5A;COX6B1;COX7C;NDUFB11;NDUFA8;COX6A1;COX5B;UQCR10;COX4I1;CYCS;COX7A2;NDUFS3;NDUFA13;UQCRB;COX7B;NDUFB2;ETFB;BLOC1S1;UQCRQ;NDUFAB1;NDUFA2;NDUFB9;NDUFB3;COX6C;NDUFA11;UQCR11;NDUFA7;MDH2;MTLN;UQCRFS1;NDUFS8;NDUFS6;NDUFA3;NDUFA6;NDUFC1;NDUFB1;CHCHD5;NDUFA5;NDUFB4;MTFR1L;NDUFV1	vascular
78	GO_Cellular_Component_2023__Asymmetric Synapse (GO:0032279)	-0.353884	-2.68948	0	3.39702e-05	0.003	78/131	33.90%	SHISA7;SRCIN1;CDK5R1;MAPK8IP2;SYNDIG1;FABP5;SHISA6;GAP43;GRIN1;NEURL1;INSYN2B;CDK5;TMEM108;RPS14;SLC4A8;SLC8A2;NLGN4Y;RPS13;RPL30;INSYN1;IQSEC3;AKAP5;RNF112;RPL7;RPS18;NETO1;NLGN1;CACNG8;ARHGAP44;ADD2;RPS25;SRGAP3;ADGRA1;SH2D5;NETO2;SAMD14;RPL12;SPOCK1;RPL8;SHANK1;ADCY8;RPL14;NLGN4X;GRIA1;CACNG5;GRIN2B;RGS14;SLC8A1;SLC8A3;GRIA2;RPL38;GRIN2A;NOS1;CTNND2;GPER1;KCND3;NLGN3;RPLP0;NTRK2;RPS3;LRP4;DLG4…	vascular
79	GO_Biological_Process_2023__Cell-Cell Adhesion Via Plasma-Membrane Adhesion Molecules (GO:0098742)	-0.338952	-2.68746	0	3.3529e-05	0.003	88/156	27.94%	CLDN16;MAG;CLDN7;L1CAM;SLITRK2;CNTN4;FAT2;CNTN2;SLITRK1;PTK7;CDH6;IL1RAPL1;CLDN1;CDH7;IGSF21;CXADR;CRTAM;AMIGO2;CELSR2;LRRC4B;GRID2;KIRREL3;CDH8;CLDN20;NECTIN1;CD177;PLXNB3;TENM4;NLGN1;CLDN11;ITGAM;ROBO1;UNC5D;LRRC4;CNTN6;PCDHB2;CDH12;PCDHB10;CRB2;CDH3;PTPRS;MPZ;DSCAML1;DSG2;CLDN18;LRFN5;CADM4;CDH1;ITGB2;PCDHB14;PCDHB16;EMB;PTPRD;FLRT3;PTPRF;TENM3;TENM1;SLITRK3;CDH13;LRRC4C;JAML;IGSF11;CD6;HMCN1;…	vascular
80	GO_Biological_Process_2023__Nucleocytoplasmic Transport (GO:0006913)	0.354552	2.68734	0	0.0113702	0.028	45/48	54.85%	BACH2;RITA1;LSG1;MALT1;GLE1;NUP98;NUP88;NUP43;NUP93;NUP35;NUP85;NUP107;NUP37;NUP160;NUP214;NEMF;NUP42;NUP155;XPO1;NUP133;RSRC1;NUP153;TPR;NUP205;RANBP2;AHCTF1;NUP54;ATXN1;POM121;NUP58;ANP32A;SEH1L;NUP50;RAE1;SEC13;NDC1;RANGAP1;NUP188;NPM1;CDAN1;HTATIP2;NUP210;UBE2I;HNRNPA1;NUP62	vascular
81	WikiPathway_2023_Human__GPCRs Other WP117	-0.407883	-2.68267	0	3.30992e-05	0.003	39/72	19.66%	GRM8;GPR62;P2RY13;HTR1F;HTR2A;EDNRA;GPR162;ADGRD1;ADGRE2;CCKBR;SSTR2;FSHR;GNRHR;RXFP1;GPR83;GPR88;GPR61;GPR18;LGR6;CELSR2;GPR176;ADORA2A;MCHR2;ADORA3;CHRM2;LTB4R2;NTSR1;GHRHR;OR1F1;PTGFR;CNR1;GPR17;CELSR1;HTR7;PROKR2;GRPR;VN1R1;OR2F1;SMO	vascular
82	GO_Biological_Process_2023__Muscle Contraction (GO:0006936)	-0.382683	-2.67167	0	3.26802e-05	0.003	55/85	33.72%	DES;EDNRA;GJC1;SNTB1;CASQ2;HRC;CRYAB;SCN7A;TMOD1;MYLK2;LMOD3;SMPX;CACNA1S;CACNA1H;MYOM2;SGCA;FXYD1;GLRA1;LMOD1;ANKRD2;KCNJ12;RYR3;CLCN1;GNAO1;MYH11;P2RX6;CHRNB2;MYL6;NMUR1;PGAM2;RYR2;SLC8A1;NOS1;MYL11;MYLK;SSPN;KLHL41;TPM2;BDKRB2;MYL6B;DTNA;TTN;GAMT;SNTA1;MYOT;CHRNB1;HCN4;TNNT2;ADRA1D;EMD;UTS2;RYR1;ALDOA;TRDN;LMOD2	vascular
83	GO_Biological_Process_2023__Nuclear-Transcribed mRNA poly(A) Tail Shortening (GO:0000289)	0.518486	2.67016	0	0.009683	0.03	19/19	48.21%	CNOT6L;PNLDC1;CNOT8;ZFP36;SAMD4A;TNKS1BP1;CNOT9;CNOT10;CNOT11;TUT7;CNOT2;CNOT4;TUT4;PARN;CNOT6;SAMD4B;PAN2;CNOT7;CNOT3	vascular
84	KEGG_2021_Human__GABAergic synapse	-0.380977	-2.65767	0	3.22717e-05	0.003	49/88	26.00%	GNG3;GABRD;SLC6A12;GNG2;GABRA1;GABRA5;SLC6A13;SLC6A1;ADCY5;GAD2;SLC38A5;GAD1;GABRE;GNG8;GNB3;GABBR1;GABRG2;PRKCG;GNGT1;SLC38A1;GABBR2;CACNA1S;ADCY1;SLC12A5;KCNJ6;GABRA4;GNG13;GNAO1;CACNA1F;GNAI1;SLC6A11;GABRB2;ADCY8;GABRQ;GABRA6;SLC32A1;GABRG3;GLS2;PLCL1;GNG11;CACNA1D;ADCY7;SLC38A3;GABRB3;CACNA1B;GABRB1;GABARAPL2;GNG10;GABRG1	vascular
85	WikiPathway_2023_Human__Calcium Regulation In Cardiac Cells WP536	-0.335714	-2.64407	0	4.24977e-05	0.004	94/145	38.86%	GNG3;RGS4;CASQ1;GNG2;GJC1;ATP1B1;CHRM4;ADCY5;CALM3;CASQ2;GJB1;CHRM1;RGS1;ATP2B3;GNG8;GNB3;GJA4;ATP1A4;PRKCG;GNGT1;GJD2;GJA5;RGS5;GNAZ;ADRA1A;CALM1;CACNA1S;CAMK2A;ADCY1;KCNB1;ATP1B2;CALM2;RGS20;RGS10;ATP2B2;ADRA1B;CHRM2;GNG13;RYR3;CAMK2B;CACNA1E;GJB2;GNAO1;CACNB1;CAMK4;PLN;GNAI1;ADCY8;YWHAH;CAMK1;RGS11;RGS14;FXYD2;RYR2;SLC8A1;SLC8A3;PRKCZ;KCNJ3;ARRB1;ATP2A3;RGS18;GJC2;CHRM5;GNG11;CACNA1D;ADCY7;RGS…	vascular
86	GO_Biological_Process_2023__Xenobiotic Transport (GO:0042908)	0.516219	2.64205	0.00324675	0.011737	0.043	13/19	15.75%	ABCC3;SLC47A1;ABCC11;SLC22A2;ABCC1;ABCC2;ABCB1;SLC22A4;SLC7A5;SLC22A1;SLC15A2;SLC31A1;GJA1	vascular
87	GO_Biological_Process_2023__Calcium-Ion Regulated Exocytosis (GO:0017156)	-0.577803	-2.63353	0	5.24743e-05	0.005	19/24	26.64%	RAB3A;SYT4;SYT13;RIMS4;SCIN;SYT5;SYT15;VAMP2;SYT1;SYT9;SYT10;RIMS3;SYT6;CLTRN;SYT17;SYT3;SYT2;SYT7;RIMS1	vascular
88	KEGG_2021_Human__Parkinson disease	-0.310753	-2.62893	0	5.1842e-05	0.005	116/228	31.20%	UCHL1;TUBB2A;TUBB4A;NDUFA4L2;COX4I2;ATP5MC1;ATP5PO;ADCY5;CALM3;GPR37;NDUFA4;DRD1;ATP5F1D;NDUFS5;ATP5MC3;NDUFC2;CALML4;CYC1;TUBA1A;MAPK10;UQCRH;NDUFB10;NDUFS7;MAPT;DDIT3;NDUFB8;COX8A;NDUFB7;NDUFB5;CALM1;CAMK2A;NDUFA1;CALM2;COX5A;SLC25A4;SDHD;SLC25A5;PSMB6;COX6B1;RPS27A;COX7C;NDUFB11;ADORA2A;NDUFA8;COX6A1;COX5B;UQCR10;COX4I1;CYCS;COX7A2;RYR3;NDUFS3;CAMK2B;KIF5C;NDUFA13;PSMD8;UBB;UQCRB;COX7B;NDUFB2;…	vascular
89	GO_Biological_Process_2023__Synapse Assembly (GO:0007416)	-0.397128	-2.6217	0	7.17148e-05	0.007	44/69	30.43%	CBLN4;GABRA1;DRD1;SLITRK1;CDK5;DNER;NLGN4Y;GABRG2;GPM6A;FGF13;WNT7A;GRID2;KIRREL3;NLGN1;WNT5A;LRRC4;PCDHB2;NRXN2;PCDHB10;SRGAP3;GABRB2;CDH1;NLGN4X;PCDHB14;PCDHB16;PTPRD;FLRT3;NLGN3;ADGRF1;NRCAM;PCDHB6;PCDHB3;PCDHB9;GABRB3;DSCAM;PCDHB4;SPOCK2;BDNF;PCDHB13;SLITRK6;PCDHB11;NRXN1;NPAS4;SHANK2	vascular
90	KEGG_2021_Human__Circadian entrainment	-0.372419	-2.61714	0	7.08711e-05	0.007	47/93	22.20%	GNG3;GNG2;GUCY1B1;ADCYAP1R1;ADCY5;CALM3;PRKG1;CACNA1G;GRIN1;GUCY1A2;KCNJ9;GNG8;GNB3;GRIA4;CALML4;GUCY1A1;PRKCG;GNGT1;RASD1;CALM1;CAMK2A;ADCY1;CALM2;CACNA1H;KCNJ6;GNG13;RYR3;GRIN2C;CAMK2B;GNAO1;GNAI1;ADCY8;CACNA1I;PLCB2;GRIA1;FOS;GRIN2B;RYR2;GRIA2;GRIN2A;NOS1;KCNJ3;PRKG2;GNG11;CACNA1D;ADCY7;ADCYAP1	vascular
91	GO_Cellular_Component_2023__Dendrite Membrane (GO:0032590)	-0.534483	-2.61232	0	7.0047e-05	0.007	21/28	26.00%	THY1;SHISA7;GABRA1;GABRA5;SHISA6;GABRE;GABRG2;KCNC1;KCNB1;ATP2B2;GABRA4;SGCE;KCNC2;GRIA1;GABRA6;GABRG3;GPER1;LAMP5;SHISA8;SHISA9;GABRG1	vascular
92	GO_Biological_Process_2023__Modulation Of Chemical Synaptic Transmission (GO:0050804)	-0.349641	-2.58609	0	9.8917e-05	0.01	68/120	30.54%	GRM3;CX3CR1;GRM8;CNTNAP4;MAPK8IP2;ATP1A2;RIMS4;GRID1;CDK5;GRIN3A;TMEM108;NPTX2;NPTXR;GRIA4;SLC4A8;CPLX2;SLC8A2;NMU;NLGN4Y;SYN1;NPTX1;SLC38A1;FER1L5;CAMK2A;GRID2;BEGAIN;SYT1;NLGN1;LRRC4;TPRG1L;NRG3;GRM4;IL1B;CHRNB2;DLGAP3;LGI1;NLGN4X;PLPPR4;GRIA1;CACNG5;GRIK4;SLC8A3;GRIA2;CHRNB4;LRRC4C;GRIK3;RIMS3;CHRNA7;CLSTN2;NLGN3;OTOF;SLC6A9;GRM5;GRIK1;BAIAP3;DLG4;CACNA1B;GRM1;DLGAP2;DGKI;RIMS1;RELN;RNF167;GRI…	vascular
93	GO_Biological_Process_2023__Energy Derivation By Oxidation Of Organic Compounds (GO:0015980)	-0.476573	-2.58375	0	9.7793e-05	0.01	25/40	24.53%	PID1;COX4I2;GFPT2;NDUFA4;CYC1;UQCRH;COX8A;MRAP2;COX5A;COX6B1;COX7C;COX6A1;COX5B;UQCR10;COX4I1;CYCS;COX7A2;UQCRB;COX7B;UQCRQ;COX6C;UQCR11;ADGRF1;MTLN;MT3	vascular
94	GO_Biological_Process_2023__Extracellular Matrix Organization (GO:0030198)	-0.329377	-2.57866	0	9.66942e-05	0.01	83/154	27.42%	MMP15;LUM;SMOC2;COL12A1;KLK7;ADAMTS4;COL24A1;COL4A3;POSTN;COL1A2;COL3A1;COL15A1;APLP1;COL16A1;COL5A3;CCDC80;ECM2;ADAMTS5;COL9A1;LOXL1;COL9A2;ADAMTS15;COL27A1;COL1A1;TGFBI;ADAMTS7;MATN1;COL4A5;HPSE2;VIT;KLK5;LOXL4;ADAMTS16;COL13A1;CYP1B1;HAS1;MMP17;MATN2;ADAM8;GREM1;ADAMTS18;MMP26;MMP16;CREB3L1;ELN;MMP11;PXDN;NID1;COL9A3;SPINT1;SPINK5;GPM6B;NID2;COL23A1;NDNF;ADAMTS8;ADAMTS20;NPNT;COLGALT2;COL5A2;N…	vascular
95	GO_Molecular_Function_2023__Neuropeptide Binding (GO:0042923)	-0.592592	-2.57547	0	0.000105182	0.011	17/21	25.10%	PTGDR2;NPY5R;GPR149;GPR37;SSTR2;MC4R;NPY1R;SORL1;SSTR3;NMUR1;MCHR1;GPR171;NPBWR1;NMUR2;OPRD1;SSTR1;OPRM1	vascular
96	GO_Biological_Process_2023__Sensory Perception (GO:0007600)	-0.463455	-2.57474	0	0.000104026	0.011	28/41	28.26%	TRPA1;PNOC;PENK;USH1C;MYO7A;MME;CCL2;ADORA2A;CHRNA4;WHRN;RETREG1;PCDH15;SCN9A;KCNA2;CHRNB2;NMB;PDYN;C5AR1;OR3A2;NTSR2;CHRNA7;PTGES;TRPV2;ALOXE3;OPRM1;ASIC3;P2RX7;PRDM12	vascular
97	GO_Cellular_Component_2023__Intercalated Disc (GO:0014704)	-0.509577	-2.56518	0	0.000112249	0.012	19/31	18.79%	DES;GJC1;ATP1B1;SCN4B;CTNNA3;GJA5;FGF13;KCNA5;CXADR;FXYD1;PKP2;PAK1;ANK3;ANK2;DSG2;YWHAH;SLC8A1;JUP;SCN1B	vascular
98	KEGG_2021_Human__Aminoacyl-tRNA biosynthesis	0.341635	2.5643	0	0.0165575	0.072	42/44	58.44%	WARS1;PARS2;MARS2;VARS2;SEPSECS;FARSB;YARS2;WARS2;YARS1;HARS2;TARS2;MTFMT;TARS3;DARS2;NARS2;CARS2;LARS2;TARS1;IARS1;QRSL1;RARS2;FARS2;DARS1;LARS1;CARS1;HARS1;RARS1;EPRS1;IARS2;SARS1;KARS1;GARS1;MARS1;GATB;QARS1;EARS2;AARS2;AARS1;GATC;PSTK;FARSA;NARS1	vascular
99	GO_Biological_Process_2023__Nervous System Development (GO:0007399)	-0.278938	-2.56248	0	0.000111042	0.012	202/411	31.00%	NRGN;LY6H;MESP1;EMX1;NRSN1;TAGLN3;ECRG4;UGT8;L1CAM;DPYSL4;MELTF;ENC1;AXL;P2RX5;SOX4;KLK6;ROGDI;OLFM1;APLP1;PTN;NDP;SCIN;EGR2;ADORA1;GJB1;ACTL6B;SOX11;DCX;CHRM1;DRD1;IGSF8;SEMA5A;DACT1;PLPPR1;FEZ1;CNTN4;NEURL1;SLITRK1;CDK5;LPAR1;NOG;POU3F3;POU6F2;MET;DNER;SH3GL3;FABP7;NPAS1;NHLH2;MOG;NPTX1;GPM6A;LSAMP;FGF13;FZD9;EFNA5;MSI1;SOX10;NEUROD2;CSPG5;KIRREL3;GFRA2;KCNQ2;CYP46A1;DPF1;HPCAL4;ADGRB2;DLX5;S10…	vascular
100	MSigDB_Hallmark_2020__IL-6/JAK/STAT3 Signaling	0.290757	2.55924	0	0.0144878	0.072	35/77	18.98%	IL6;IL18R1;CXCL1;OSMR;IL4R;MAP3K8;CXCL3;SOCS3;IL15RA;IFNGR1;CSF2RB;IL2RG;CXCL13;EBI3;TLR2;IL3RA;ITGB3;LEPR;PDGFC;STAT3;CSF2RA;TNFRSF12A;CNTFR;IL1R1;IL17RA;IL2RA;IL10RB;HMOX1;CSF1;IL13RA1;FAS;IFNAR1;TGFB1;TNFRSF1A;IL6ST	vascular
101	GO_Biological_Process_2023__Nuclear Transport (GO:0051169)	0.372869	2.55554	0	0.0135301	0.076	32/37	42.60%	GLE1;NUP98;NUP88;NUP43;NUP93;NUP35;NUP85;NUP107;NUP37;NUP160;NUP214;NUP42;NUP155;XPO1;NUP133;RSRC1;NUP153;TPR;NUP205;RANBP2;AHCTF1;NUP54;POM121;NUP58;ANP32A;SEH1L;NUP50;RAE1;SEC13;NDC1;RANGAP1;NUP188	vascular
102	GO_Biological_Process_2023__Modulation Of Excitatory Postsynaptic Potential (GO:0098815)	-0.501223	-2.54255	0	0.000164792	0.017	23/31	30.16%	STX1B;GRIN1;TMEM108;SLC8A2;WNT7A;NETO1;NLGN1;GRIN2C;SHANK1;NLGN4X;CUX2;GRIN2B;SLC8A3;GRIN2A;PRKCZ;CHRNA7;NLGN3;DLG4;RIMS1;GRIN2D;CBLN1;RELN;NRXN1	vascular
103	WikiPathway_2023_Human__Hair Follicle Development Cytodifferentiation Part 3 Of 3 WP2840	-0.390554	-2.5371	0	0.000163057	0.017	44/71	31.12%	IGF1;FOSB;TP63;KLK7;KLK6;RUNX3;GPRC5D;DKK1;EGR2;BCL11B;LGR5;S100A4;PHLDA1;SFRP1;KRT19;BMPR1A;KLK5;BMP4;IGFBP5;WNT5A;GSDMA;JUN;SPINK5;FOXQ1;HR;PROM1;FOS;ADAMTS20;CCN2;SOSTDC1;DKK3;GATA3;SOX2;CD200;NOTCH2;GAS1;DSC2;KITLG;SOX9;PERP;LRIG1;WIF1;FST;LHX2	vascular
104	KEGG_2021_Human__Coronavirus disease	-0.308619	-2.53676	0	0.000161358	0.017	93/199	23.36%	SYK;PIK3CD;AGTR1;C3;C1QA;RPS14;RPL10;RPS23;C1QC;RPS13;ISG15;RPL19;RPL3;CFD;RPL30;PRKCG;MAPK10;RPL9;FAU;RPS4X;CCL2;CXCL10;RPS11;RPL36AL;F13A1;RPL29;RPS15;RPL10A;RPS27A;RPL7A;RPL7;RPS18;RPS3A;RPS9;RPL32;RPLP2;C6;ACE;RPS4Y1;RPL27A;RPS25;RPL26;RPS16;RPS7;RPL34;RPL23;RPS12;RPS28;RPS8;RPL39;RPL27;RPS21;IL1B;JUN;RPS5;RPL12;RPL24;C3AR1;RPL15;RPL8;RPS15A;RPL14;RPL41;RPL18A;UBA52;RPL18;RPS20;RPLP1;RPL13;MA…	vascular
105	KEGG_2021_Human__Diabetic cardiomyopathy	-0.311805	-2.52649	0	0.000195183	0.02	82/183	23.54%	NDUFA4L2;COX4I2;ATP5MC1;ATP5PO;GFPT2;COL1A2;COL3A1;PIK3CD;NDUFA4;ATP5F1D;AGTR1;NDUFS5;ATP5MC3;NDUFC2;COL1A1;CYC1;PRKCG;MAPK10;UQCRH;NDUFB10;NDUFS7;SLC2A4;NDUFB8;COX8A;NDUFB7;NDUFB5;CAMK2A;NDUFA1;COX5A;SLC25A4;SDHD;SLC25A5;COX6B1;COX7C;NDUFB11;NDUFA8;COX6A1;COX5B;UQCR10;COX4I1;ACE;COX7A2;NDUFS3;CAMK2B;IRS1;RAC2;NDUFA13;UQCRB;COX7B;NDUFB2;PLN;PDK2;UQCRQ;NDUFAB1;NDUFA2;ATP5PF;COX6A2;NDUFB9;NDUFB3;PL…	vascular
106	GO_Biological_Process_2023__Regulation Of Dopamine Secretion (GO:0014059)	-0.580823	-2.51824	0	0.000228317	0.024	16/21	25.22%	SYT4;SYT13;SYT5;SYT15;FGF20;SYT1;SYT9;SNCA;KCNA2;CHRNB2;SYT10;SYT6;SYT17;SYT3;SYT2;SYT7	vascular
107	GO_Biological_Process_2023__Negative Regulation Of Neuron Projection Development (GO:0010977)	-0.419166	-2.51817	0	0.00022601	0.024	31/54	24.60%	THY1;STX1B;MAG;STMN2;ZNF365;LPAR1;MGARP;KIAA0319;MINAR1;RTN4RL2;ITM2C;RTN4R;BCL11A;NLGN1;NGEF;PTPRS;TNR;APOE;CIB1;DPYSL3;MCF2;SPOCK1;SEMA3A;PTPRO;EFNB3;DCC;CRMP1;LRP4;RTN4RL1;MT3;GFI1	vascular
108	GO_Molecular_Function_2023__Monoatomic Cation Channel Activity (GO:0005261)	-0.348356	-2.51121	0	0.000240962	0.026	48/97	24.26%	TRPA1;NOX5;KCNG1;ABCC9;KCNK1;SLC4A11;KCNK3;TRPC3;ANO1;KCNQ4;SLC24A3;KCNF1;CACNB2;TRPC4;GRIN1;PKD2L1;KCNA1;NALCN;TRPV6;KCNK9;CALHM2;CACNA1E;TRPV3;P2RX1;HCN1;TRPC6;KCNA2;MCOLN3;SLC24A2;UNC80;KCNK10;AQP1;TRPM5;PIEZO2;TRPM3;TMEM63C;RYR2;PKD1L2;SLC24A4;TRPM2;TRPC5;CHRNA7;CACNA1D;KCNU1;TRPV2;CALHM4;KCNK17;KCNK7	vascular
109	WikiPathway_2023_Human__DNA IR Damage And Cellular Response Via ATR WP4016	0.270725	2.50654	0	0.0165785	0.1	65/81	47.80%	CDC45;FOXM1;CHEK2;FANCI;CDC25C;BCL6;CDK2;BRCA2;POLN;PLK1;RAD51;E2F1;EXO1;RECQL5;PML;RAD9A;BRIP1;PALB2;PPM1D;TDP1;MCPH1;RFWD3;POLB;MDC1;CEP164;RAD52;MDM2;BARD1;HERC2;ATR;TP53;RMI1;BRCC3;RAD17;RBBP8;RECQL;ATM;WRN;UIMC1;TP53BP1;MLH1;MRE11;TOPBP1;UBE2D3;XRCC5;PRKDC;SP1;SMARCAL1;SMC1A;RPA1;TOP3A;NBN;UPF1;XPA;CLK2;HUS1;ATRIP;SMARCC2;RPA2;MSH2;SEM1;RAD1;DCLRE1A;ABRAXAS1;BRCA1	vascular
110	WikiPathway_2023_Human__Monoamine GPCRs WP58	-0.495799	-2.5038	0	0.000281179	0.029	25/32	31.02%	HTR1A;HTR1F;HTR2A;CHRM4;CHRM1;DRD1;ADRA2A;HRH2;ADRA2B;ADRA1A;ADRA1B;CHRM2;HTR2C;HTR5A;HTR7;DRD5;HTR2B;ADRA2C;DRD4;CHRM5;HTR1E;CHRM3;ADRA1D;ADRB1;HTR6	vascular
111	GO_Biological_Process_2023__Regulation Of Synaptic Transmission, Glutamatergic (GO:0051966)	-0.413221	-2.49954	0	0.000286859	0.03	36/54	33.42%	GRM3;GRM8;MAPK8IP2;ATP1A2;DRD1;GRIN1;CDK5;CCL2;CACNG3;CACNG4;SYT1;NLGN1;CACNG8;GRIN2C;TPRG1L;GRM4;HCN1;CACNG7;PLPPR4;CACNG5;GRIN2B;GRIN2A;CACNG2;GRIK3;NLGN3;GRM5;GRIK1;GRM1;DGKI;GRIN2D;RELN;RNF167;NRXN1;UNC13A;GRM7;CCR2	vascular
112	GO_Biological_Process_2023__Synaptic Transmission, Glutamatergic (GO:0035249)	-0.533058	-2.49893	0	0.000284074	0.03	22/27	32.73%	SLC17A8;GRID1;GRIN3A;GRIA4;GRID2;SLC17A6;SLC17A7;GRIN2C;UNC13C;GRIA1;GRIN2B;GRIK4;GRIA2;GRIN2A;GRIK3;GRIK1;GRIN2D;GRIA3;UNC13A;SLC1A4;GRIK2;GRIK5	vascular
113	GO_Biological_Process_2023__Mitochondrial Electron Transport, NADH To Ubiquinone (GO:0006120)	-0.475314	-2.49872	0	0.000281343	0.03	25/34	35.30%	NDUFA4;NDUFS5;NDUFC2;NDUFB10;NDUFS7;NDUFB8;NDUFB7;NDUFB5;NDUFA8;NDUFS3;NDUFB2;NDUFAB1;NDUFA2;NDUFB9;NDUFB3;NDUFA7;NDUFS8;NDUFS6;NDUFA3;NDUFA6;NDUFC1;NDUFB1;NDUFA5;NDUFB4;NDUFV1	vascular
114	GO_Biological_Process_2023__Neuron Differentiation (GO:0030182)	-0.319932	-2.49856	0	0.000278663	0.03	85/140	37.12%	EMX1;FZD10;FZD2;CDK5R1;SOX4;RUNX3;MYO7A;SOX11;WNT16;WNT6;EPOP;CDK5;MET;ITM2C;RUNX2;IL1RAPL1;BHLHE22;WNT7A;WNT10B;DMD;INSM1;SNPH;WNT10A;RNF112;TENM4;ATP2B2;WNT5A;VSX1;WNT2;MANF;INHBA;SALL1;ASCL1;ERBB4;ANOS1;SPINK5;MYT1L;SPOCK1;PIN1;BRSK1;NLGN4X;EPHA5;PTPRD;WNT3;WNT4;TENM3;TENM1;IER2;VXN;FUT9;NTRK2;LMX1A;FZD7;PBX4;ID2;CTF1;RORB;WNT11;TENM2;ALK;ATP8A2;SHH;LMX1B;PAX6;BRSK2;VEGFA;RTN3;EMX2;BRINP3;WNT5…	vascular
115	GO_Cellular_Component_2023__Calcium Channel Complex (GO:0034704)	-0.389585	-2.49386	0	0.000292272	0.031	32/59	23.45%	CACNA2D2;CALM3;CASQ2;CACNA1G;CACNB2;SCN7A;TRPC4;PKD2L1;FKBP1B;SCN1A;CACNG3;CACNA2D3;CALM1;CACNA1S;CALM2;CACNA1H;CACNG8;RYR3;CACNA1E;CACNA1F;CACNB1;SMDT1;SCN9A;CACNG7;CACNA2D4;CACNA1I;SCN8A;RYR2;TRPC5;CACNA1D;CACHD1;CACNA1B	vascular
116	GO_Biological_Process_2023__Cell Communication By Electrical Coupling Involved In Cardiac Conduction (GO:0086064)	-0.612176	-2.49364	0	0.00028954	0.031	12/16	19.10%	ATP1A3;GJC1;ATP1B1;ATP1A2;GJC3;FKBP1B;GJA5;ATP1B2;PKP2;RYR2;SLC8A1;GJD3	vascular
117	GO_Molecular_Function_2023__Transmitter-Gated Monoatomic Ion Channel Activity Involved In Regulation Of Postsynaptic Membrane Potential (GO:1904315)	-0.493132	-2.48744	0	0.000302796	0.033	26/32	33.87%	GRID1;GRIN3A;GRIA4;GRID2;CHRNA4;GRIN2C;CHRNB2;CHRNB3;GRIA1;CHRNA2;GRIN2B;GRIK4;GRIA2;GRIN2A;CHRNB4;GRIK3;CHRNA7;GRIK1;CHRNB1;CHRNA9;GRIN2D;GRIA3;CHRNA5;GRIK2;GRIK5;GABRA2	vascular
118	GO_Biological_Process_2023__Sodium Ion Transport (GO:0006814)	-0.364466	-2.48689	0	0.000300018	0.033	40/80	21.06%	SLC6A7;KCNK1;SCN2B;SLC6A12;SLC4A11;ATP1B1;SLC6A13;SLC24A3;SLC6A1;SLC6A17;ATP1A2;SCN7A;SLC6A15;SCN4B;PKD2L1;SLC4A8;HCN3;SLC8A2;ATP1A4;NALCN;SCN1A;FGF13;SCN3B;ASIC1;HCN1;HCN2;SCN9A;SLC6A11;SLC24A2;SLC5A6;SCNN1D;SCN8A;SLC8A1;SLC8A3;SLC24A4;SLC5A1;SCN1B;SLC12A1;ASIC4;SLC6A9	vascular
119	GO_Biological_Process_2023__Histone Lysine Methylation (GO:0034968)	0.390712	2.48671	0	0.0169386	0.113	31/32	56.68%	SMYD2;PAGR1;DOT1L;WDR5B;SETDB2;KDM6A;SETDB1;SMYD3;MLLT10;NCOA6;KMT2C;BOD1L1;KMT2A;RBBP5;WDR82;KMT2D;WDR5;HCFC2;SETD1B;PAXIP1;SKIC8;DPY30;HCFC1;SETD1A;EHMT2;KMT2B;SUV39H2;MEN1;SMYD1;BOD1;CXXC1	vascular
120	WikiPathway_2023_Human__GABA Receptor Signaling WP4159	-0.4904	-2.48649	0	0.000297291	0.033	23/31	33.87%	GABRD;GABRA1;GABRA5;SLC6A1;GAD2;GAD1;GABRE;GABBR1;GABRG2;GABBR2;GABRA4;SLC6A11;GABRB2;GABRQ;GABRA6;SLC32A1;GABRG3;GABRB3;GABRB1;GABRG1;AP2S1;AP2M1;GABRA2	vascular
121	GO_Molecular_Function_2023__Neurotransmitter Receptor Activity Involved In Regulation Of Postsynaptic Membrane Potential (GO:0099529)	-0.580037	-2.48385	0	0.000302365	0.034	18/20	33.87%	GRID1;GRIN3A;GRIA4;GRID2;GRIN2C;GRIA1;GRIN2B;GRIK4;GRIA2;GRIN2A;GRIK3;GRIK1;CHRNB1;GRIN2D;GRIA3;GRIK2;GRIK5;GABRA2	vascular
122	WikiPathway_2023_Human__Interactome Of Polycomb Repressive Complex 2 PRC2 WP2916	0.522001	2.48105	0	0.0165051	0.118	16/16	47.85%	EZH2;TRIM35;ELL;EED;STK38;AEBP2;SETX;MORC3;JARID2;SUZ12;MTF2;BCLAF1;THRAP3;RBBP4;EZH1;RBBP7	vascular
123	GO_Biological_Process_2023__Positive Regulation Of Synapse Assembly (GO:0051965)	-0.487492	-2.47923	0	0.000299666	0.034	24/32	31.53%	SYNDIG1;SLITRK2;SLITRK5;SLITRK1;SEMA4D;IL1RAPL1;WNT7A;LRRC4B;GRID2;EPHB3;SLITRK4;NLGN1;VSTM5;CUX2;PTPRD;SLITRK3;EPHB1;CLSTN2;NLGN3;EPHB2;BDNF;SLITRK6;NRXN1;SEMA4A	vascular
124	GO_Biological_Process_2023__Regulation Of DNA Damage Checkpoint (GO:2000001)	0.501952	2.47351	0	0.0163641	0.125	18/18	49.86%	DEPDC1B;BRCA2;RAD51;THOC5;DDX39B;RFWD3;TTI1;BARD1;CRY1;THOC1;CCAR2;TTI2;ETAA1;RPA2;WDR76;TELO2;BRCA1;FEM1B	vascular
125	WikiPathway_2023_Human__Synaptic Vesicle Pathway WP2267	-0.411158	-2.46756	0	0.000335092	0.039	31/48	35.19%	RAB3A;STX1B;SLC22A3;SNAP25;STX1A;ATP1A2;SLC1A3;SYP;SLC17A8;CPLX2;SYN2;SYN1;SLC38A1;DNM1;SLC17A6;VAMP2;SLC25A4;SLC17A7;SYT1;UNC13C;SLC32A1;PARK7;CACNA1B;SLC18A2;RIMS1;AP2S1;UNC13A;AP2M1;CACNA1A;SLC6A4;SYN3	vascular
126	GO_Biological_Process_2023__Axon Guidance (GO:0007411)	-0.318878	-2.46376	0	0.000347251	0.041	75/144	28.10%	RAC3;NOTCH3;L1CAM;CDK5R1;EFNA3;SEMA3D;SEMA3C;GAP43;SEMA5A;FEZ1;CNTN4;CNTN2;SEMA4D;SEMA3G;NELL2;UNC5C;CNTN1;LGR6;PLEKHG4;EFNA5;EPHB6;RNF165;EPHB3;NTN1;SLIT2;LRTM1;UNC5A;PLXNB3;DPYSL5;PLXNA4;WNT5A;CNTN6;KIF5C;SEMA6D;ARHGEF25;SEMA5B;DSCAML1;CXCL12;TNR;ANOS1;NCAM1;LGI1;NFASC;CYFIP2;EPHA5;CNTN5;EMB;SEMA3A;PTPRO;EFNB3;DCC;PLXNC1;SEMA7A;NELL1;EPHB1;SCN1B;SEMA3E;SMO;KIF5A;EFNA2;NRCAM;NOTCH2;SHH;DSCAM;ROB…	vascular
127	MSigDB_Hallmark_2020__Oxidative Phosphorylation	-0.294447	-2.45721	0	0.000359198	0.043	182/200	64.74%	ATP5MC1;ATP5PO;ATP1B1;NDUFA4;ATP5F1D;LDHB;ATP6V1F;ATP5MC3;NDUFC2;CYC1;UQCRH;TIMM10;NDUFS7;GPX4;TOMM22;NDUFB8;COX8A;NDUFB7;NDUFB5;NDUFA1;COX5A;SLC25A4;ATP6V0B;SDHD;SLC25A5;COX6B1;COX7C;NDUFA8;COX6A1;COX5B;UQCR10;TIMM13;COX4I1;CYCS;COX7A2;NDUFS3;MRPL11;UQCRB;COX7B;NDUFB2;ETFB;ATP5MG;UQCRQ;NDUFAB1;NDUFA2;ATP5PF;ATP5MF;NDUFB3;TIMM8B;MRPS12;COX6C;MRPL34;PRDX3;MDH1;ATP5PD;BAX;HSD17B10;PHB2;ATP5ME;ATP5F…	vascular
128	GO_Molecular_Function_2023__Ligand-Gated Monoatomic Anion Channel Activity (GO:0099095)	-0.596601	-2.45715	0	0.000356101	0.043	15/18	26.00%	GABRA1;GABRA5;GLRA2;GABRE;GABRG2;GLRA1;GABRA4;GLRB;GABRB2;GLRA3;GABRA6;GABRG3;GABRB3;GABRB1;GABRG1	vascular
129	GO_Molecular_Function_2023__G Protein-Coupled Peptide Receptor Activity (GO:0008528)	-0.404241	-2.45304	0	0.00039719	0.049	37/56	29.92%	CX3CR1;AVPR1A;PTH1R;EDNRA;CYSLTR2;GPR37;NPSR1;CCKBR;MC4R;GPR83;GALR1;NPY1R;S1PR2;SORCS1;MCHR2;LTB4R2;GHRHR;SORCS3;MAS1;NMUR1;MCHR1;GPR171;GRPR;GIPR;VIPR2;FPR1;OPRD1;BDKRB2;SORCS2;GPR37L1;NPFFR1;CYSLTR1;VIPR1;FPR3;NMBR;GLP1R;GLP2R	vascular
130	WikiPathway_2023_Human__NRXN1 Deletion Syndrome WP5398	-0.605721	-2.44922	0	0.000415703	0.052	15/17	30.16%	GRIN1;GRIN3A;GRIA4;NLGN1;GRIN2C;NLGN4X;GRIA1;GRIN2B;GRIA2;GRIN2A;NLGN3;DLG4;GRIN2D;GRIA3;NRXN1	vascular
131	GO_Cellular_Component_2023__Synaptic Vesicle Membrane (GO:0030672)	-0.411778	-2.44856	0	0.00041221	0.052	30/51	24.39%	SYT4;SYPL2;SYNDIG1;SYT5;SYP;SLC17A8;SYNPR;TMEM163;SYN2;SYN1;SV2B;FER1L5;SYNGR3;RAB26;SV2A;SLC17A6;VAMP2;SLC17A7;SYT1;RPH3A;PTPRS;SYNGR1;UNC13C;SLC32A1;SV2C;OTOF;DOC2A;RAB3B;SYT2;SLC18A2	vascular
132	GO_Molecular_Function_2023__NADH Dehydrogenase (Ubiquinone) Activity (GO:0008137)	-0.47094	-2.443	0	0.000408775	0.052	24/33	35.30%	NDUFA4;NDUFS5;NDUFC2;NDUFB10;NDUFS7;NDUFB8;NDUFB7;NDUFB5;NDUFA8;NDUFS3;NDUFB2;NDUFA2;NDUFB9;NDUFB3;NDUFA7;NDUFS8;NDUFS6;NDUFA3;NDUFA6;NDUFC1;NDUFB1;NDUFA5;NDUFB4;NDUFV1	vascular
133	GO_Biological_Process_2023__Regulation Of mRNA Processing (GO:0050684)	0.353044	2.44216	0	0.0195966	0.159	31/34	51.04%	CDK11A;SRPK1;IWS1;METTL16;NCBP1;SRPK2;PAPOLA;SAFB;DHX9;SLTM;RBM39;YTHDC1;CWC22;SON;SRSF10;SRRM1;TIA1;SUPT6H;MAGOH;SAFB2;RBM23;QKI;LARP7;SRSF3;MAGOHB;PTCD2;JMJD6;CDK9;CDK11B;RBM20;ZFP36L1	vascular
134	GO_Biological_Process_2023__Regulation Of Smooth Muscle Cell Migration (GO:0014910)	-0.571264	-2.43941	0	0.000419621	0.052	14/19	18.87%	PLAU;IGF1;PDGFRB;CCN4;CCL5;BMPR1A;NDRG4;SLIT2;SORL1;LRP1;IGFBP5;S100A11;NELL1;PDGFA	vascular
135	GO_Biological_Process_2023__Adenylate Cyclase-Inhibiting G Protein-Coupled Receptor Signaling Pathway (GO:0007193)	-0.410609	-2.42857	0	0.000437343	0.055	31/50	26.85%	CORT;GRM8;HTR1A;HTR1F;P2RY12;CHRM4;ADCY5;GPR37;CHRM1;ADRA2A;RGS1;HRH3;LPAR1;GABBR1;NPY1R;INSL3;GABBR2;AKAP5;CHRM2;GRM4;GNAI1;HTR5A;OXER1;MCHR1;DRD4;CHRM5;ADCY7;GPR37L1;OPRM1;HTR1E;CHRM3	vascular
136	GO_Molecular_Function_2023__Histone H4 Acetyltransferase Activity (GO:0010485)	0.460897	2.42706	0	0.0203441	0.174	20/20	53.96%	BRCA2;MSL3;KAT6A;JADE2;KAT7;HAT1;EP300;NAA50;BRD1;USP22;BRPF3;ING3;NAA40;NAA60;ING4;KAT8;JADE1;BRPF1;MEAF6;KAT5	vascular
137	GO_Cellular_Component_2023__Mitochondrial Proton-Transporting ATP Synthase Complex (GO:0005753)	-0.577766	-2.41838	0	0.00049969	0.064	13/17	23.52%	ATP5MC1;ATP5PO;ATP5F1D;ATP5MC3;ATP5MJ;ATP5MG;ATP5PF;ATP5MF;ATP5MK;ATP5PD;ATP5ME;ATP5F1E;ATP5F1B	vascular
138	GO_Cellular_Component_2023__Proton-Transporting ATP Synthase Complex (GO:0045259)	-0.577766	-2.41838	0	0.00049969	0.064	13/17	23.52%	ATP5MC1;ATP5PO;ATP5F1D;ATP5MC3;ATP5MJ;ATP5MG;ATP5PF;ATP5MF;ATP5MK;ATP5PD;ATP5ME;ATP5F1E;ATP5F1B	vascular
139	KEGG_2021_Human__Prion disease	-0.284262	-2.41828	0	0.000495693	0.064	121/251	29.67%	TUBB2A;TUBB4A;NDUFA4L2;COX4I2;ATP5MC1;ATP5PO;PIK3CD;NDUFA4;ATP5F1D;GRIN1;HSPA2;GRIN3A;NDUFS5;C1QA;ATP5MC3;NDUFC2;C1QC;CCL5;CYC1;TUBA1A;MAPK10;UQCRH;NDUFB10;NDUFS7;DDIT3;NDUFB8;COX8A;NDUFB7;NDUFB5;HSPA1A;CACNA1S;NDUFA1;COX5A;SLC25A4;SDHD;SLC25A5;PSMB6;COX6B1;COX7C;NDUFB11;NDUFA8;COX6A1;COX5B;UQCR10;C6;COX4I1;CYCS;COX7A2;RYR3;NDUFS3;GRIN2C;KIF5C;RAC2;NDUFA13;PSMD8;CREB3L1;CACNA1F;UQCRB;COX7B;NDUFB2…	vascular
140	KEGG_2021_Human__Cytokine-cytokine receptor interaction	0.205164	2.41788	0	0.0203563	0.186	63/210	11.30%	IL6;IL18R1;BMP5;CSF3;IL1RL1;CXCL1;CXCL2;RELT;OSMR;IL4R;TNFRSF4;IL1RL2;AMH;CXCL8;IL19;TNFRSF8;NGFR;CCR9;TNFRSF10D;TNFRSF11A;TNFRSF10A;TNFRSF10C;CXCL3;CXCR4;NGF;IL15RA;IL20RB;CCR3;IL27RA;IFNGR1;ACKR3;IFNLR1;CSF2RB;IL2RG;CCL28;CXCL13;EBI3;IL3RA;TNFRSF10B;IL12A;LEPR;TNFSF14;IL1RN;GDF5;CNTF;INHBB;LTA;IL6R;CSF2RA;TNFRSF9;CCR4;GHR;TNFRSF11B;BMP6;TNFRSF13B;TNFRSF12A;TNFSF13B;CNTFR;IL1R1;IFNAR2;XCR1;ACVR1…	vascular
141	GO_Molecular_Function_2023__Delayed Rectifier Potassium Channel Activity (GO:0005251)	-0.510775	-2.41626	0	0.000525909	0.069	18/26	23.71%	KCNG1;KCNS1;KCNS3;KCNE4;KCNA3;KCNA4;KCNC1;KCNA5;KCNB1;KCNH2;KCNE3;KCNA2;KCNA6;KCNC2;KCNB2;KCNH1;KCNG3;KCNG2	vascular
142	GO_Biological_Process_2023__Calcium Ion Transport (GO:0006816)	-0.326992	-2.40549	0	0.000562425	0.074	70/109	39.79%	TRPA1;TRPC3;SLN;SLC24A3;CACNA1G;CACNB2;RAMP2;TRPC4;GRIN3A;CCL5;SLC8A2;NALCN;CACNG3;CACNA1S;CAMK2A;TRPV6;CACNA1H;RAMP1;ATP2B2;CACNG8;CHRNA4;RYR3;CRACR2B;CACNB1;TRPV3;TRPC6;CHRNB2;CACNG7;MCOLN3;CACNA2D4;SLC24A2;NMUR1;TRPM5;TRPM3;TPT1;RYR2;SLC8A1;SLC8A3;SLC24A4;TRPM2;TRPC5;CHRNA7;NMUR2;ATP2A3;SELENOK;CACNA1D;ATP2C2;TRPV2;ITPR1;SLC3A2;P2RX7;CCL3;CACNG1;PSEN2;KCNN4;CASR;ORAI1;CACNA1A;RYR1;CACNA2D1;MCO…	vascular
143	KEGG_2021_Human__Salivary secretion	-0.369901	-2.40547	0	0.000558031	0.074	33/71	17.94%	ATP1A3;CD38;ATP1B1;GUCY1B1;ADCY5;CALM3;PRKG1;ATP1A2;PRB2;ATP2B3;GUCY1A2;CALML4;ATP1A4;GUCY1A1;PRKCG;ADRA1A;CALM1;ADCY1;TRPV6;LPO;ATP1B2;CALM2;VAMP2;ATP2B2;ADRA1B;RYR3;BST1;ADCY8;PRH2;PLCB2;FXYD2;NOS1;KCNMA1	vascular
144	KEGG_2021_Human__cGMP-PKG signaling pathway	-0.304907	-2.40168	0	0.000573719	0.077	68/157	22.97%	PIK3CG;ATP1A3;CNGA1;PDE3A;EDNRA;KCNJ8;ATP1B1;GUCY1B1;ADCY5;CALM3;PRKG1;ATP1A2;ADORA1;ADRA2A;NPPA;ATP2B3;AGTR1;GUCY1A2;MYL9;MYLK2;CALML4;SLC8A2;ATP1A4;GUCY1A1;IRAG1;ADRA2B;ADRA1A;CALM1;CACNA1S;ADCY1;ATP1B2;CALM2;SLC25A4;SLC25A5;PDE5A;ATP2B2;ADORA3;ADRA1B;IRS1;KCNMB1;CREB3L1;CACNA1F;PLN;TRPC6;GNAI1;NPPC;ADCY8;KCNMB2;PIK3R5;PIK3R6;PLCB2;FXYD2;SLC8A1;SLC8A3;KCNMA1;ADRA2C;NFATC4;MYLK;IRS4;ATP2A3;PRKG2…	vascular
145	GO_Biological_Process_2023__Striated Muscle Contraction (GO:0006941)	-0.405498	-2.40139	0	0.000569305	0.077	40/53	39.85%	STAC;SCN2B;ATP1B1;CASQ2;ATP1A2;SCN4B;MYLK2;MYL3;TNNT1;LMOD3;SMPX;DMD;SCN3B;KCNH2;RYR3;JSRP1;PGAM2;STAC2;RYR2;SLC8A1;NOS1;CCDC78;SCN1B;KLHL41;DTNA;TTN;TNNT2;TNNC2;GAA;TNNT3;TNNI3;MYL4;MYH7B;RYR1;PVALEF;TNNC1;MYH7;TNNI2;CHRNA1;TNNI1	vascular
146	GO_Biological_Process_2023__Positive Regulation Of DNA-templated Transcription, Elongation (GO:0032786)	0.293824	2.40064	0	0.0220068	0.208	48/55	51.68%	ELL2;MED18;ZMYND8;MED9;THOC5;DDX39B;ELL;CCNT1;MED17;KAT7;MED15;MED21;MED28;NCBP1;MED27;BRD4;CCNK;MED14;CDK12;THOC1;CCNT2;CDC73;CDK13;MED4;SCAF8;TCERG1;SUPT6H;MED6;EAPP;MED23;PWWP2A;ERCC6;SUPT16H;LEO1;MED1;MED30;MED16;SUPT5H;CDK9;HMGN1;MED7;MED10;PWWP2B;MED29;MED22;MED31;MED8;MED26	vascular
147	GO_Biological_Process_2023__Regulation Of Postsynaptic Membrane Potential (GO:0060078)	-0.462972	-2.39786	0	0.000591237	0.08	24/35	30.21%	GABRA1;GABRA5;MAPK8IP2;GABRE;GRIN1;INSYN2B;GABRG2;INSYN1;GRID2;NPFF;GLRA1;GABRA4;CHRNA4;GRIN2C;GABRA6;GRIN2B;GRIN2A;GABRG3;NLGN3;DRD4;GABRG1;GRIN2D;GSK3A;NPAS4	vascular
148	WikiPathway_2023_Human__miRNA Targets In ECM And Membrane Receptors WP2911	-0.533938	-2.39594	0	0.000599797	0.082	10/21	5.05%	THBS2;ITGA11;COL6A3;THBS1;COL1A2;COL3A1;COL5A3;COL6A2;SDC2;COL6A1	vascular
149	GO_Biological_Process_2023__Stress-Activated Protein Kinase Signaling Cascade (GO:0031098)	0.455921	2.39568	0	0.0218438	0.219	17/20	35.93%	NLRP1;MAPK13;MAPK11;STK26;MAP3K5;MAP2K3;IKBKB;MAPK14;TAOK2;KAT7;MAP3K20;MAP3K13;MAP3K7;MAPK8;CCM2;MAPK1;PDCD10	vascular
150	GO_Biological_Process_2023__Regulation Of AMPA Receptor Activity (GO:2000311)	-0.519318	-2.39485	0	0.000601758	0.083	17/24	28.10%	SHISA7;MAPK8IP2;SHISA6;CACNG3;CACNG4;NLGN1;CACNG8;CACNG7;SHANK1;CACNG5;CACNG2;NLGN3;GSG1L;SHISA8;SHISA9;PRRT1;RELN	vascular
151	KEGG_2021_Human__Herpes simplex virus 1 infection	0.161538	2.391	0	0.0210802	0.223	368/464	57.39%	IL6;PIK3R3;ZNF716;HLA-DRB1;HLA-DRB5;HLA-DPA1;SOCS3;IKBKE;ZNF285;ZNF597;ZNF792;IFNGR1;TLR2;HLA-DOA;ZNF670;HLA-DQA2;IL12A;ZNF878;ITGB3;TNFSF14;PILRA;ZNF630;ZNF534;ITGA5;ZNF343;ZNF619;CGAS;LTA;ZNF658;ZFP69B;PILRB;CASP8;ZNF208;ZNF157;ZNF564;IFNAR2;TRADD;ZNF19;ZNF726;ZNF273;HLA-DMA;ZNF563;ZNF182;ZNF517;ZNF222;ZNF600;ZNF90;ZNF556;ZNF79;NECTIN2;ZNF761;ZNF879;ZNF112;EIF4EBP1;BIRC3;CASP9;IRAK4;ZNF808;ZNF4…	vascular
152	GO_Biological_Process_2023__Regulation Of Trans-Synaptic Signaling (GO:0099177)	-0.455074	-2.39056	0	0.000648645	0.087	26/36	34.37%	CX3CR1;FABP5;GRID1;GRIN3A;GRIA4;SLC4A8;NLGN4Y;GRID2;NLGN1;LRRC4;NRG3;NLGN4X;GRIA1;GRIK4;GRIA2;LRRC4C;GRIK3;NLGN3;GRIK1;CACNA1B;RELN;GRIA3;GRIK2;CACNA1A;GRIK5;IQSEC2	vascular
153	GO_Molecular_Function_2023__Hormone Activity (GO:0005179)	-0.409278	-2.38405	0	0.000707586	0.095	29/46	27.62%	SST;CRH;GRP;CCK;VGF;PNOC;CORT;IGF1;PENK;CHGB;EDN3;NPY;SPX;APLN;NPPA;NPFF;INHBA;C1QTNF12;NPPC;INHA;NMB;POMC;PTHLH;GAL;VIP;KNG1;OXT;PTH;AGT	vascular
154	GO_Biological_Process_2023__Positive Regulation Of Activated T Cell Proliferation (GO:0042104)	-0.583057	-2.37979	0	0.00074035	0.1	15/17	33.22%	IGF1;IGF2;IGFBP2;CD24;TNFSF9;PYCARD;HHLA2;IL12RB1;IL18;RPS3;ICOSLG;IL23R;FADD;TMIGD2;IL23A	vascular
155	GO_Biological_Process_2023__Regulation Of Heart Contraction (GO:0008016)	-0.368605	-2.37663	0	0.000766354	0.103	36/64	27.97%	DES;TBX2;HSPB7;CALM3;ATP1A2;HRC;APLN;ATP2B3;CYP2J2;SLC8A2;GJA5;CALM1;CALM2;CACNA1H;FXYD1;ATP2B2;ADORA3;KCNJ12;TNNI3K;PLN;ANK2;SLC4A3;TMIGD3;RYR2;SLC8A1;SLC8A3;NOS1;SCN1B;ATP2A3;KCNG2;HCN4;SPTBN4;TH;TNNT2;AGT;GSK3A	vascular
156	WikiPathway_2023_Human__NO cGMP PKG Mediated Neuroprotection WP4008	-0.420425	-2.37346	0	0.000785745	0.107	23/44	20.41%	CNGA1;PDE3A;NEFL;GUCY1B1;BCL2;NPPA;GRIN1;GUCY1A2;ACTN2;GUCY1A1;NOS2;CALM1;CAMK2A;CYCS;GRIN2C;CAMK2B;TSPO;IL1B;GRIN2B;GRIN2A;NOS1;CNGA4;PRKG2	vascular
157	KEGG_2021_Human__Viral protein interaction with cytokine and cytokine receptor	0.272022	2.37219	0	0.0227404	0.247	28/69	14.38%	IL6;IL18R1;CXCL1;CXCL2;CXCL8;IL19;CCR9;TNFRSF10D;TNFRSF10A;TNFRSF10C;CXCL3;CXCR4;IL20RB;CCR3;ACKR3;IL2RG;CCL28;CXCL13;TNFRSF10B;TNFSF14;LTA;IL6R;CCR4;XCR1;IL2RA;IL10RB;CCL8;CSF1	vascular
158	GO_Cellular_Component_2023__Exocytic Vesicle Membrane (GO:0099501)	-0.404878	-2.37071	0	0.000811048	0.112	29/50	24.39%	SYT4;SYPL2;SYNDIG1;SYT5;SYP;SLC17A8;SYNPR;TMEM163;SYN2;SYN1;SV2B;FER1L5;SYNGR3;RAB26;SV2A;SLC17A6;VAMP2;SLC17A7;SYT1;RPH3A;PTPRS;SYNGR1;UNC13C;SLC32A1;SV2C;OTOF;RAB3B;SYT2;SLC18A2	vascular
159	GO_Biological_Process_2023__G Protein-Coupled Receptor Signaling Pathway, Coupled To Cyclic Nucleotide Second Messenger (GO:0007187)	-0.423729	-2.37068	0	0.000805255	0.112	32/43	34.90%	HTR1A;PTH1R;HTR1F;HTR2A;CHRM4;NPY;CHRM1;DRD1;HRH3;HRH2;NPY1R;CCL2;CHRM2;HTR2C;LPAR3;CNR1;HTR5A;HTR7;HTR2B;DRD4;OPRD1;CHRM5;TSHR;OPRM1;VIPR1;HTR1E;CHRM3;AGT;HTR6;CNR2;CCR1;HTR4	vascular
160	GO_Biological_Process_2023__Regulation Of Chromatin Organization (GO:1902275)	0.414743	2.36986	0	0.0223561	0.254	24/25	52.63%	TAL1;MKI67;KANSL2;MSL3;LSM11;KANSL1;PHF20;RLIM;SETD5;TLK1;TLK2;OGT;HNRNPU;MSL2;KANSL3;MSL1;ZNF445;MLLT3;METTL4;WDR5;KAT8;HCFC1;SETD1A;SSRP1	vascular
161	GO_Biological_Process_2023__Neurotransmitter Transport (GO:0006836)	-0.403231	-2.36712	0	0.000836164	0.117	35/48	38.55%	SLC22A3;SNAP25;LIN7A;SLC1A6;SLC1A3;SLC17A8;HRH3;SLC6A15;SYN2;SYN1;SLC38A1;SLC17A6;SNPH;SLC17A7;SYT1;NRXN2;GRM4;BRSK1;SLC32A1;PDZD11;SLC28A2;SLC18A2;SLC29A2;SLC29A1;LIN7B;NRXN1;UNC13A;SLC29A4;SLC1A2;PPFIA3;SLC6A4;GABRA2;SYN3;SNAPIN;SLC6A3	vascular
162	GO_Biological_Process_2023__Histone Modification (GO:0016570)	0.262725	2.36621	0	0.0217401	0.259	76/80	65.78%	SIRT4;AURKC;RUVBL1;HDAC4;GATAD2A;RUVBL2;MSL3;HDAC1;TAF5L;USP3;HDAC8;JADE2;TADA2A;TRRAP;KAT7;TBL1X;SUDS3;EPC1;MBTD1;EPC2;GATAD2B;SIRT1;EP300;YEATS2;MBD2;MTA3;EP400;MIER1;CREBBP;PHF20L1;TBL1XR1;RBBP4;UBE2B;HDAC3;SIRT2;KAT2B;JADE3;ACTL6A;HDAC2;ING3;SUPT3H;ING5;UBE2A;BRD8;HDAC5;CARM1;TAF12;HDAC11;ING4;BRMS1L;YEATS4;MRGBP;MTA1;CHD4;KAT14;RBBP7;HDAC6;UBE2N;JADE1;MORF4L1;ENY2;MIER2;CHD3;MEAF6;KAT5;BRMS1…	vascular
163	GO_Molecular_Function_2023__Active Monoatomic Ion Transmembrane Transporter Activity (GO:0022853)	-0.533956	-2.36615	0	0.000842397	0.119	16/21	26.03%	SLC19A1;COX4I2;UQCRH;COX8A;COX5A;COX6B1;COX7C;COX5B;UQCR10;COX4I1;UQCRB;COX7B;COX7A1;UQCRHL;SLC18A2;COX7A2L	vascular
164	GO_Biological_Process_2023__Regulation Of Neuron Projection Development (GO:0010975)	-0.295531	-2.36518	0	0.000848542	0.121	83/172	29.29%	STX1B;MAG;SRCIN1;SEZ6;STMN2;CDK5R1;MUSK;NTRK3;PTN;ZNF365;GPC2;CDK5;LPAR1;PTK7;MINAR1;RTN4RL2;NTRK1;ITM2C;IL1RAPL1;MARK1;RTN4R;NDRG4;EPHB3;ATP1B2;PLPPR5;PLXNB3;NLGN1;NCS1;ARHGAP44;WNT5A;PAK1;CAMK2B;NTNG2;PTPRS;TBR1;CFL1;TNR;APOE;CIB1;DPYSL3;ZNF804A;SPOCK1;KIF1A;BRSK1;CAMK1;CTNNA2;SERPINI1;NDNF;SEMA3A;ROR1;PTPRO;PAK3;TENM3;DCC;CRMP1;LRRC4C;SCN1B;KNDC1;NTNG1;FUT9;NTRK2;PPFIA2;PTK6;CSMD3;RIT2;TWF2;DD…	vascular
165	KEGG_2021_Human__Intestinal immune network for IgA production	0.328218	2.36495	0	0.02105	0.261	18/41	12.97%	IL6;CCR9;HLA-DRB1;HLA-DRB5;HLA-DPA1;CXCR4;IL15RA;ITGB7;CD80;CCL28;HLA-DOA;HLA-DQA2;MADCAM1;TNFRSF13B;TNFSF13B;ICOS;HLA-DMA;IL15	vascular
166	GO_Biological_Process_2023__Regulation Of Oligodendrocyte Differentiation (GO:0048713)	-0.55948	-2.36184	0	0.00087253	0.124	11/18	13.73%	OPALIN;PTN;DAAM2;ZNF365;SLC45A3;TMEM98;IL34;TENM4;HES5;HES1;TNFRSF21	vascular
167	GO_Biological_Process_2023__Regulation Of Presynapse Assembly (GO:1905606)	-0.593635	-2.35859	0	0.000895944	0.129	12/16	21.92%	SLITRK2;SLITRK1;IL1RAPL1;WNT7A;LRRTM3;LRRC4B;IL1RAPL2;MDGA1;SNCA;LRFN5;SLITRK3;LRFN4	vascular
168	GO_Biological_Process_2023__Regulation Of Presynapse Organization (GO:0099174)	-0.593635	-2.35859	0	0.000895944	0.129	12/16	21.92%	SLITRK2;SLITRK1;IL1RAPL1;WNT7A;LRRTM3;LRRC4B;IL1RAPL2;MDGA1;SNCA;LRFN5;SLITRK3;LRFN4	vascular
169	GO_Biological_Process_2023__Signal Release From Synapse (GO:0099643)	-0.436901	-2.35501	0	0.000919121	0.134	30/37	42.59%	RAB3A;SNAP25;STX1A;LIN7A;HRH3;CDK5;CPLX2;SYN2;SYN1;SNPH;VAMP2;SYT1;NRXN2;GRM4;SNCA;SYT10;SLC32A1;PDZD11;OTOF;PCLO;RIMS1;LIN7B;NRXN1;UNC13A;PPFIA3;SYN3;SNAPIN;CPLX1;DNAJC5;PTPRN2	vascular
170	GO_Molecular_Function_2023__NADH Dehydrogenase (Quinone) Activity (GO:0050136)	-0.44764	-2.34972	0	0.000994316	0.145	24/34	35.30%	NDUFA4;NDUFS5;NDUFC2;NDUFB10;NDUFS7;NDUFB8;NDUFB7;NDUFB5;NDUFA8;NDUFS3;NDUFB2;NDUFA2;NDUFB9;NDUFB3;NDUFA7;NDUFS8;NDUFS6;NDUFA3;NDUFA6;NDUFC1;NDUFB1;NDUFA5;NDUFB4;NDUFV1	vascular
171	GO_Biological_Process_2023__Regulation Of Transcription Elongation By RNA Polymerase II (GO:0034243)	0.260433	2.34431	0	0.0231072	0.291	65/76	53.10%	ELL2;MED18;RECQL5;ZMYND8;MED9;INTS13;EAF2;INTS3;ELL;SRCAP;INTS2;INTS7;INTS6;INTS9;CCNT1;RNF168;WDR43;INTS10;MED17;MED15;INTS14;INTS8;MED21;MED28;NELFA;INTS4;NCBP1;MED27;CCNK;MED14;CDK12;CDC73;ZMYND11;CDK13;MED4;HNRNPU;TCERG1;SUPT6H;RNF8;MED6;EAPP;MED23;PWWP2A;INTS12;VHL;NELFCD;LARP7;LEO1;INTS11;MED1;MED30;MED16;SUPT5H;CDK9;MED7;MED10;INTS1;PWWP2B;MED29;NELFE;MED22;MED31;MED8;MED26;LDB1	vascular
172	GO_Molecular_Function_2023__Wide Pore Channel Activity (GO:0022829)	-0.560405	-2.34408	0	0.0010454	0.151	13/18	21.99%	GJC1;GJB1;GJA4;GJC3;GJD2;GJA5;PRF1;GSDMA;GJB2;GSDME;PANX2;GJC2;GSDMD	vascular
173	GO_Biological_Process_2023__Regulation Of Cation Channel Activity (GO:2001257)	-0.388621	-2.33946	0	0.00110154	0.16	25/52	17.79%	STAC;KCNG1;KCNS1;EDNRA;JPH4;CACNB2;HRC;KCNAB1;HCN3;FKBP1B;FGF13;DMD;CALM1;CALM2;VAMP2;NETO1;JPH3;ANK3;CACNB1;ANK2;HCN1;HCN2;JSRP1;EPO;NOS1	vascular
174	MSigDB_Hallmark_2020__Myogenesis	-0.285296	-2.33713	0	0.00112844	0.166	115/187	40.29%	FABP3;PVALB;IGF1;CASQ1;LSP1;DES;LDB3;ITGA7;COL6A3;CKB;SLN;COL3A1;SOD3;COL15A1;CASQ2;ACTA1;COL6A2;HRC;REEP1;CRYAB;SPDEF;TAGLN;HSPB2;ACTN2;MYL3;COL1A1;SCD;TNNT1;DAPK2;FKBP1B;CFD;GJA5;DMD;EFS;FOXO4;EPHB3;CACNA1H;MYOM2;SGCA;FXYD1;APOD;LAMA2;ANKRD2;ACTC1;KCNH2;ADAM12;CAMK2B;SGCG;GNAO1;MYH11;SPEG;NCAM1;PPFIA4;COX6A2;PGAM2;NOS1;SGCD;CDH13;KCNH1;MYLK;SSPN;TPM2;COX7A1;ATP6AP1;ERBB3;CKM;CD36;PC;HBEGF;BDKRB…	vascular
175	KEGG_2021_Human__Alzheimer disease	-0.259714	-2.33517	0	0.00116065	0.172	150/344	28.88%	TUBB2A;FZD10;TUBB4A;NDUFA4L2;COX4I2;LPL;FZD2;CDK5R1;ATP5MC1;ATP5PO;PIK3CD;CALM3;DKK2;DKK1;NDUFA4;MME;WNT16;CHRM1;ATP5F1D;WNT6;GRIN1;CDK5;NDUFS5;ATP5MC3;NDUFC2;CALML4;GPR83;CYC1;TUBA1A;NOS2;MAPK10;UQCRH;NDUFB10;NDUFS7;MAPT;DDIT3;NDUFB8;COX8A;FZD9;WNT7A;WNT10B;NDUFB7;NDUFB5;CALM1;CACNA1S;NDUFA1;CALM2;COX5A;SLC25A4;WNT10A;SDHD;LRP1;SLC25A5;PSMB6;COX6B1;COX7C;NDUFB11;NDUFA8;COX6A1;COX5B;APC2;UQCR10;W…	vascular
176	GO_Biological_Process_2023__Vesicle Cargo Loading (GO:0035459)	0.449934	2.33495	0	0.0230632	0.305	18/20	39.87%	CTAGE6;SEC24D;SEC31B;MIA2;PICALM;SEC24C;SEC24A;SEC23B;TMED10;KIF13A;SEC24B;RAB1A;SEC23A;SEC31A;MIA3;SAR1A;TBC1D20;SEC13	vascular
177	GO_Biological_Process_2023__Phospholipase C-activating G Protein-Coupled Receptor Signaling Pathway (GO:0007200)	-0.350573	-2.32807	0	0.00123181	0.183	44/74	29.24%	CX3CR1;PLCE1;PTH1R;HTR2A;P2RY12;ANO1;CHRM1;DRD1;ADRA2A;CCKBR;AGTR1;GPR65;LPAR1;GPR174;GPR83;GPR18;ADRA1B;CHRM2;HTR2C;GPR17;C3AR1;LPAR4;CMKLR1;ESR1;F2RL2;NMUR1;TACR1;C5AR1;PTGER3;DRD5;GRPR;HTR2B;NMUR2;FPR1;OPRD1;VIP;GRM5;GRM1;OPRM1;ADRA1D;AGT;FPR3;NMBR;P2RY8	vascular
178	WikiPathway_2023_Human__Histone Modifications WP2369	0.308731	2.32793	0	0.0233611	0.315	45/50	55.42%	H4C4;H3C6;H4C2;H3C10;H4C8;SMYD2;SETBP1;KMT5C;H4C5;EZH2;DOT1L;SMYD4;SETDB2;SETD4;EED;SETDB1;SETD7;SMYD3;EHMT1;AEBP2;PRDM2;SETD5;KMT2E;NSD1;SETD3;ASH1L;SETD2;KMT2C;KMT2A;KMT5B;KMT2D;H3-3A;EZH1;KMT5A;SETD1B;SMYD5;SETD1A;EHMT2;H4C16;KMT2B;SUV39H2;SETD9;SETD6;SMYD1;H4C3	vascular
179	GO_Biological_Process_2023__Regulation Of Synapse Assembly (GO:0051963)	-0.39369	-2.32775	0	0.00122381	0.183	31/51	30.16%	SYNDIG1;MUSK;SLITRK2;LHFPL4;SLITRK5;SLITRK1;IL1RAPL1;WNT7A;LRRTM3;LRRC4B;GRID2;EPHB3;SLITRK4;NLGN1;IL1RAPL2;MDGA1;SNCA;CHRNB2;LRFN5;CUX2;PTPRD;SLITRK3;EPHB1;CLSTN2;NLGN3;LRFN4;ROBO2;EPHB2;BDNF;SLITRK6;NRXN1	vascular
180	GO_Biological_Process_2023__Aerobic Respiration (GO:0009060)	-0.375955	-2.32516	0	0.00123812	0.185	36/58	35.30%	CHCHD10;ATP5F1D;NDUFS5;NDUFC2;UQCRH;NDUFB10;NDUFS7;NDUFB8;NDUFB7;NDUFB5;NDUFA1;NDUFB11;NDUFA8;NDUFS3;NDUFA13;UQCRB;NDUFB2;BLOC1S1;NDUFAB1;NDUFA2;NDUFB9;NDUFB3;NDUFA11;NDUFA7;MDH2;SLC25A51;NDUFS8;NDUFS6;NDUFA3;NDUFA6;NDUFC1;NDUFB1;NDUFA5;NDUFB4;MTFR1L;NDUFV1	vascular
181	GO_Molecular_Function_2023__Potassium Ion Transmembrane Transporter Activity (GO:0015079)	-0.467589	-2.32178	0	0.00127983	0.192	17/28	24.26%	KCNG1;ABCC9;KCNK1;KCNK3;KCNQ4;KCNF1;KCNA1;SLC12A5;KCNK9;HCN1;KCNA2;SLC12A7;KCNK10;AQP1;KCNU1;KCNK17;KCNK7	vascular
182	GO_Biological_Process_2023__Positive Regulation Of Nervous System Development (GO:0051962)	-0.392644	-2.3211	0	0.00127168	0.192	26/48	25.18%	CX3CR1;SERPINF1;SYNDIG1;MME;SOX11;SLITRK2;SLITRK5;SLITRK1;IL1RAPL1;WNT7A;LRRC4B;GRID2;EPHB3;SLITRK4;NLGN1;CUX2;RGS14;PTPRD;SLITRK3;GPER1;EPHB1;CLSTN2;NLGN3;EPHB2;OPRM1;LRP2	vascular
183	GO_Biological_Process_2023__tRNA Aminoacylation For Protein Translation (GO:0006418)	0.336516	2.321	0	0.0239087	0.328	31/35	49.74%	WARS1;PARS2;MARS2;FARSB;WARS2;YARS1;HARS2;TARS2;TARS3;DARS2;NARS2;CARS2;LARS2;TARS1;IARS1;RARS2;FARS2;DARS1;LARS1;CARS1;HARS1;RARS1;EPRS1;IARS2;SARS1;KARS1;GARS1;MARS1;QARS1;EARS2;AARS2	vascular
184	GO_Biological_Process_2023__Regulation Of Muscle Contraction (GO:0006937)	-0.482184	-2.31995	0	0.00127997	0.193	24/27	43.33%	PLCE1;ATP1A2;CNN1;MYL9;MYLK2;MYL3;TNNT1;KCNA1;CACNA1S;CHRM2;CACNB1;MYL5;KCNB2;NMUR2;TNNC2;TNNT3;CACNG1;SRI;TNNC1;CHRNA3;CAV1;TNNI1;ENO1;DAPK3	vascular
185	GO_Molecular_Function_2023__Ligand-Gated Monoatomic Ion Channel Activity (GO:0015276)	-0.52161	-2.31976	0	0.00127192	0.193	20/22	39.79%	GABRA5;GRIN1;GRIA4;GLRA1;CHRNA4;CHRNB2;GRIA1;GRIN2B;GRIK4;CHRNB4;ZACN;CHRNB1;GABRB1;GRIA3;CHRNA5;GRIK5;GABRA2;CNGA3;CHRNA3;TRPV1	vascular
186	GO_Biological_Process_2023__Glial Cell Differentiation (GO:0010001)	-0.451706	-2.31902	0	0.00126935	0.194	23/32	30.73%	EGR2;TPPP;CDK5;HAPLN1;SOX10;HAPLN2;MYRF;HES5;NCAN;PAX2;FGF10;VCAN;GPC1;SLC8A3;ERBB3;BCAN;SOX2;SHH;SOX8;RELN;SOX9;HAPLN3;PTPRZ1	vascular
187	GO_Biological_Process_2023__Regulation Of Neuronal Synaptic Plasticity (GO:0048168)	-0.435221	-2.31824	0	0.00126147	0.194	21/34	27.62%	RAB3A;SHISA7;SHISA6;SYP;GRIN1;SLC8A2;CAMK2A;NETO1;GRIN2C;CAMK2B;SLC4A10;APOE;SYNGR1;GRIN2B;GRIN2A;NCDN;DLG4;SHISA8;SHISA9;EPHB2;GRIN2D	vascular
188	GO_Biological_Process_2023__Neuron Projection Guidance (GO:0097485)	-0.311978	-2.3174	0	0.00126962	0.197	67/120	32.55%	NOTCH3;L1CAM;CDK5R1;EFNA3;SEMA3D;SEMA3C;SEMA5A;FEZ1;CNTN4;CNTN2;SEMA4D;SEMA3G;NELL2;UNC5C;CNTN1;LGR6;PLEKHG4;EFNA5;EPHB6;EPHB3;SLIT2;LRTM1;DPYSL5;WNT5A;CNTN6;KIF5C;SEMA6D;ARHGEF25;SEMA5B;DSCAML1;CXCL12;TNR;LGI1;NFASC;CYFIP2;EPHA5;CNTN5;EMB;SEMA3A;PTPRO;EFNB3;DCC;SEMA7A;NELL1;EPHB1;SCN1B;SEMA3E;KIF5A;EFNA2;NRCAM;NOTCH2;SHH;DSCAM;ROBO2;EPHB2;EPHA6;NRXN3;BDNF;EFNA4;PALLD;RELN;NRXN1;SEMA3B;SEMA4A;EPH…	vascular
189	GO_Biological_Process_2023__Positive Regulation Of Excitatory Postsynaptic Potential (GO:2000463)	-0.51422	-2.31632	0	0.00126711	0.198	17/22	30.16%	STX1B;GRIN1;WNT7A;NETO1;NLGN1;GRIN2C;SHANK1;CUX2;GRIN2B;GRIN2A;PRKCZ;NLGN3;DLG4;RIMS1;GRIN2D;RELN;NRXN1	vascular
190	GO_Molecular_Function_2023__Voltage-Gated Calcium Channel Activity (GO:0005245)	-0.403739	-2.31006	0	0.00133809	0.21	36/45	42.36%	CACNA2D2;CACNA1G;CACNB2;SCN7A;SCN1A;CACNG3;CACNG4;CACNA2D3;CACNA1S;CACNA1H;NCS1;CACNG8;CACNA1E;CACNA1F;CACNB1;SCN9A;CACNG7;CACNA2D4;CACNA1I;CACNG5;SCN8A;CACNG2;TMC2;CACNA1D;CACNA1B;OPRM1;CACNA1A;RYR1;CACNA2D1;SCN3A;TRPV1;SCN2A;TPCN2;CATSPER3;CACNB3;CACNB4	vascular
191	GO_Molecular_Function_2023__Cytokine Receptor Activity (GO:0004896)	0.269681	2.30412	0	0.0255698	0.359	29/67	15.50%	IL18R1;IL1RL1;OSMR;IL4R;IL1RL2;FLT3;IL15RA;CCR3;IFNLR1;CSF2RB;IL2RG;EBI3;IL3RA;IL17REL;LEPR;IL6R;CSF2RA;CCR4;GHR;CNTFR;IL1R1;IFNAR2;IL17RD;IL17RA;IL2RA;IL10RB;IL13RA1;LIFR;FZD4	vascular
192	GO_Biological_Process_2023__Sodium Ion Transmembrane Transport (GO:0035725)	-0.348771	-2.30281	0	0.00146559	0.23	37/76	21.06%	SLC6A7;KCNK1;SCN2B;ATP1A3;SLC6A12;ATP1B1;SLC6A13;SLC24A3;SLC6A1;SLC6A17;ATP1A2;SLC6A15;SCN4B;PKD2L1;SLC4A8;HCN3;SLC8A2;ATP1A4;NALCN;ATP1B2;SCN3B;ASIC1;HCN1;HCN2;SCN9A;SLC6A11;SLC24A2;FXYD2;SCNN1D;SLC8A1;SLC8A3;SLC24A4;SLC5A1;SCN1B;SLC12A1;ASIC4;SLC6A9	vascular
193	GO_Biological_Process_2023__Cell Junction Organization (GO:0034330)	-0.36511	-2.3027	0	0.00145676	0.23	34/61	30.46%	SNCB;SH3BP1;L1CAM;SLC6A1;C1QA;PTK7;SLC8A2;CLDN1;MAPT;CXADR;SNCG;AJM1;RAB39B;SNCA;PIN1;PPFIA4;NLGN4X;GRHL2;SLC8A3;PAK3;MARVELD3;CTNND2;SEMA3E;CHRNA7;NLGN3;PPFIA2;LRP4;GRM5;TJP3;MYOT;CBLN2;CBLN1;RHOA;TGFB3	vascular
194	WikiPathway_2023_Human__Oligodendrocyte Specification And Differentiation Leading To Myelin Components For CNS WP4304	-0.463481	-2.30263	0	0.00144804	0.23	22/29	31.82%	PLP1;IGF1;MAG;BMP2;OLIG2;OLIG1;MYT1;MOG;LIF;OMG;SOX10;BMP4;ASCL1;IL1B;SOX6;NKX2-2;SHH;SOX8;MBP;SOX9;CNP;PDGFB	vascular
195	WikiPathway_2023_Human__Photodynamic Therapy Induced NF kB Survival Signaling WP3617	0.366579	2.30098	0	0.0250928	0.365	16/31	19.79%	IL6;PTGS2;SELE;CXCL2;CXCL8;MMP2;VCAM1;ICAM1;RELB;CFLAR;BIRC3;EGLN2;IL1A;IKBKB;TNFRSF1A;NFKB2	vascular
196	GO_Biological_Process_2023__Positive Regulation Of Transcription Elongation By RNA Polymerase II (GO:0032968)	0.308693	2.30072	0	0.0242564	0.365	37/42	51.68%	ELL2;MED18;ZMYND8;MED9;ELL;CCNT1;MED17;MED15;MED21;MED28;NCBP1;MED27;CCNK;MED14;CDK12;CDC73;CDK13;MED4;TCERG1;SUPT6H;MED6;EAPP;MED23;PWWP2A;LEO1;MED1;MED30;MED16;CDK9;MED7;MED10;PWWP2B;MED29;MED22;MED31;MED8;MED26	vascular
197	WikiPathway_2023_Human__Host Pathogen Interaction Of Human Coronaviruses Autophagy WP4863	0.445697	2.29828	0	0.0237106	0.368	18/19	44.90%	WIPI1;ATG4A;ZFYVE1;ATG7;PIK3R4;ATG10;ATG12;ATG16L1;MTOR;PIK3C3;RB1CC1;ATG3;ATG5;ATG13;ATG16L2;BECN1;ULK2;ULK1	vascular
198	WikiPathway_2023_Human__Disruption Of Postsynaptic Signaling By CNV WP4875	-0.442153	-2.29223	0	0.00158797	0.247	21/33	30.16%	STX1A;GRIN1;CAMK2A;NLGN1;GRIN2C;CAMK2B;NRXN2;RPH3A;SHANK1;NLGN4X;GRIN2B;RYR2;GRIN2A;NLGN3;GRM1;ARC;NRXN3;GRIN2D;DLGAP1;SYNGAP1;NRXN1	vascular
199	GO_Biological_Process_2023__Cell Chemotaxis (GO:0060326)	-0.42263	-2.28731	0	0.00167023	0.262	31/39	42.44%	PDGFRB;ENC1;PDGFRA;SEMA5A;AGTR1;LPAR1;BIN2;KIT;PLXNB3;HGF;NR4A1;CXCL12;NELL1;EPHB1;DEFB109B;CCN3;EGR3;HBEGF;CCL20;VEGFA;CORO1B;CX3CL1;RAB13;TNFRSF25;PDGFB;EPHA2;PRKCD;RHOG;AZU1;ARRB2;HMGB2	vascular
200	GO_Biological_Process_2023__Regulation Of Axon Extension (GO:0030516)	-0.442141	-2.28335	0	0.0017414	0.272	18/34	24.53%	MAG;L1CAM;OLFM1;KIAA0319;SEMA3G;MAPT;RTN4R;NTN1;SHTN1;TRIM46;PTPRS;APOE;ISLR2;SEMA3A;SEMA7A;NRCAM;TWF2;MT3	vascular
201	GO_Molecular_Function_2023__Nuclear Receptor Coactivator Activity (GO:0030374)	0.288414	2.28157	0	0.0253537	0.396	46/50	59.80%	CCDC62;FGF2;PPARGC1A;TACC1;HELZ2;PPRC1;NCOA1;NCOA7;RBM14;CNOT9;RNF4;NCOA3;NCOA2;MED17;ZMIZ1;CCAR1;ACTN4;TMF1;MED14;KDM1A;NCOA6;MED4;MED13;THRAP3;DCAF6;CNOT6;SS18;USP22;CALCOCO1;ZMIZ2;ETS1;BRD8;CARM1;MED12;PKN1;MED1;MED30;MED22;ENY2;ELK1;PRKCB;ATXN7L3;TRERF1;SFR1;HMGA1;WDR77	vascular
202	GO_Cellular_Component_2023__Histone Acetyltransferase Complex (GO:0000123)	0.386104	2.27841	0	0.0249411	0.4	27/27	61.45%	KANSL2;TAF5L;JADE2;TADA2A;KAT7;KANSL1;PHF20;EP300;SUPT20H;OGT;CREBBP;KANSL3;KAT2B;JADE3;BRPF3;WDR5;ING5;SGF29;ING4;KAT8;HCFC1;JADE1;TADA2B;BRPF1;MEAF6;KAT2A;MCRS1	vascular
203	GO_Biological_Process_2023__Adenylate Cyclase-Modulating G Protein-Coupled Receptor Signaling Pathway (GO:0007188)	-0.299182	-2.27629	0	0.00191743	0.291	81/138	34.55%	CORT;GRM8;PTH1R;HTR1F;P2RY12;ADORA2B;ADGRD1;ADCYAP1R1;ADCY5;GPR37;DRD1;ADRA2A;PTGER1;RAMP2;RGS1;TBXA2R;ADGRE2;GPR65;LPAR1;MC4R;GABBR1;NPY1R;GNAZ;CXCL10;INSL3;GABBR2;ADCY1;GPR26;AKAP5;GPR3;ADGRB2;RAMP1;ADORA2A;ADRA1B;CHRM2;ADGRB3;CXCL11;GHRHR;GNAO1;PTGER4;PTGFR;CNR1;GNAI1;ADCY8;OXER1;MCHR1;PTGER3;DRD5;GPR171;GIPR;ADM;PTHLH;GPER1;VIPR2;ADGRG5;ADGRF1;FPR1;GNAT2;CACNA1D;ADCY7;ADCYAP1;VIP;GPR37L1;TSHR…	vascular
204	GO_Biological_Process_2023__Organic Cation Transport (GO:0015695)	0.374677	2.27279	0.00380228	0.0252	0.41	14/28	14.26%	SLC47A1;SLC22A2;SLC22A16;SLC19A3;SLC47A2;SEC14L1;SLC22A4;SLC22A1;SLC29A3;PDZK1;SLC19A2;SLC18B1;SLC25A29;SLC25A42	vascular
205	GO_Biological_Process_2023__Positive Regulation Of Synaptic Transmission, Glutamatergic (GO:0051968)	-0.524237	-2.27176	0	0.00198633	0.3	17/21	33.42%	DRD1;GRIN1;CCL2;CACNG3;CACNG4;NLGN1;CACNG8;GRIN2C;CACNG7;CACNG5;GRIN2B;GRIN2A;NLGN3;GRIN2D;RELN;NRXN1;CCR2	vascular
206	GO_Molecular_Function_2023__Ubiquitin-Like Protein Transferase Activity (GO:0019787)	0.184855	2.27163	0	0.0248153	0.413	193/235	54.93%	RNF144B;MARCHF3;RAG1;TRIM71;FBXO24;ASB4;TRIM5;NHLRC1;RNF217;TNFSF13B;TNFAIP3;RNF212B;TRIM32;LNX2;RNF220;UHRF1;KLHL21;BIRC3;PML;ZNRF1;FBXL14;PIAS2;TNFAIP1;PDZRN3;HERC5;RNF115;DDB2;MALT1;TRIM17;SMURF2;TRAF2;LRSAM1;TRIM25;KLHL20;HDAC4;RNF40;TRIM11;FANCL;MARCHF8;UBR4;TRIM27;RNF169;CBLL1;MDM2;TRIM56;BCOR;CHFR;BARD1;RSPRY1;RNF4;TRAF6;RNF168;RNF213;ZNF738;SMURF1;WWP1;BIRC2;MGRN1;ATG10;UHRF2;ANAPC4;ATG16…	vascular
207	GO_Molecular_Function_2023__Histone H3 Methyltransferase Activity (GO:0140938)	0.342124	2.26903	0	0.024615	0.421	32/36	50.60%	PRDM16;MECOM;SMYD2;SETBP1;PRMT6;EZH2;DOT1L;SETDB2;SETD4;NSD2;SETDB1;SETD7;EHMT1;SETD5;KMT2E;JARID2;NSD1;SETD3;SETD2;NSD3;KMT2C;KMT2A;KMT2D;PRMT2;EZH1;CARM1;SETD1B;METTL23;SETD1A;EHMT2;KMT2B;SUV39H2	vascular
208	GO_Biological_Process_2023__Mesoderm Formation (GO:0001707)	0.472368	2.26569	0	0.0243463	0.425	10/17	15.33%	ITGA8;SNAI1;ITGB4;HMGA2;ITGA2;ITGB3;TBX19;ITGA3;SCX;BMPR2	vascular
209	GO_Biological_Process_2023__Postsynaptic Membrane Organization (GO:0001941)	-0.541714	-2.26473	0	0.00210419	0.316	13/17	30.16%	SHISA7;MUSK;LHFPL4;NLGN4Y;NLGN1;LRRC4;NRXN2;NLGN4X;NLGN3;LRP4;DLG4;CHRNB1;NRXN1	vascular
210	GO_Biological_Process_2023__Heterochromatin Organization (GO:0070828)	0.328595	2.26442	0	0.0238986	0.428	32/37	49.82%	PRDM16;SNAI1;HMGA2;MECOM;LMNB1;LOXL2;UHRF1;EZH2;PPM1D;MTHFR;SETDB2;SPTY2D1;SCMH1;SETDB1;SETD7;PCID2;UBR5;RB1;SIRT1;UBR2;TRIP12;SMARCA5;BAZ2A;HP1BP3;KMT2D;SIRT2;HDAC2;EZH1;HDAC5;CBX3;CTBP1;L3MBTL1	vascular
211	GO_Biological_Process_2023__Muscle Cell Development (GO:0055001)	-0.463379	-2.26399	0	0.00209209	0.316	20/28	31.41%	IGF1;RAMP2;ACTN2;MEGF10;CXADR;DMD;MYH11;ANK2;HES1;HEY2;SLC8A1;SDC1;TTN;CHRNB1;ACTN3;ASB2;VEGFA;SGCZ;ALPK2;EFEMP2	vascular
212	GO_Molecular_Function_2023__Ionotropic Glutamate Receptor Activity (GO:0004970)	-0.574729	-2.26397	0	0.00208014	0.316	14/16	32.73%	GRIN1;GRIN3A;GRIA4;GRIN2C;GRIN2B;GRIK4;GRIA2;GRIN2A;GRIK3;GRIK1;GRIN2D;GRIA3;GRIK2;GRIK5	vascular
213	GO_Molecular_Function_2023__Lysine-Acetylated Histone Binding (GO:0070577)	0.417501	2.26168	0	0.0231805	0.433	20/22	44.91%	BRDT;ZMYND8;MLLT1;TAF1;PSME4;ZZEF1;SMARCA4;BRD4;PHIP;TRIM24;KMT2A;BAZ2A;ZZZ3;BRD2;BRD7;MLLT3;BRD9;DPF2;CARM1;YEATS4	vascular
214	GO_Molecular_Function_2023__Acetylation-Dependent Protein Binding (GO:0140033)	0.417501	2.26168	0	0.0231805	0.433	20/22	44.91%	BRDT;ZMYND8;MLLT1;TAF1;PSME4;ZZEF1;SMARCA4;BRD4;PHIP;TRIM24;KMT2A;BAZ2A;ZZZ3;BRD2;BRD7;MLLT3;BRD9;DPF2;CARM1;YEATS4	vascular
215	GO_Biological_Process_2023__Learning (GO:0007612)	-0.400511	-2.26156	0	0.00213678	0.323	26/43	30.43%	MAPK8IP2;SLC6A1;PTN;SLC8A2;NLGN4Y;GPR88;FGF13;CHRNB2;STRA6;SHANK1;BRSK1;NLGN4X;RGS14;SLC8A3;MAP1A;NLGN3;NTRK2;CLDN5;DLG4;EPHB2;TH;NRXN3;CNTNAP2;NRXN1;NPAS4;SHANK2	vascular
216	GO_Biological_Process_2023__Cell Junction Assembly (GO:0034329)	-0.321393	-2.25905	0	0.00217819	0.332	50/92	30.43%	SH3BP1;GJC1;DRD1;SLITRK1;CDK5;DNER;GJA4;CDH6;GPM6A;CDH7;KIRREL3;CDH8;PKP2;NLGN1;PCDHB2;CDH12;NRXN2;PCDHB10;CDH3;CDH1;PCDHB14;PCDHB16;GRHL2;FLRT3;CTNND2;CDH13;NLGN3;ADGRF1;FSCN1;NRCAM;CDH22;PCDHB6;PCDHB3;CLDN5;PCDHB9;CDH17;CDH18;DSCAM;PCDHB4;SPOCK2;BDNF;PKP1;PKP3;PCDHB13;SLITRK6;PCDHB11;RHOA;NRXN1;CDH9;SHANK2	vascular
217	GO_Biological_Process_2023__Response To Ethanol (GO:0045471)	-0.552159	-2.2586	0	0.00217078	0.332	13/17	26.51%	CRHBP;GLRA2;GRIN1;GRIN3A;GLRA1;CHRNB2;SOD1;GRIN2B;ADH6;GRIN2A;DRD4;OPRM1;TH	vascular
218	GO_Biological_Process_2023__Protein Autoubiquitination (GO:0051865)	0.264899	2.25847	0	0.022973	0.438	52/69	41.66%	DEPDC1B;SH3RF2;RAG1;TRIM71;ASB4;BRCA2;RAD51;RNF220;RNF122;UHRF1;RNF19B;SH3RF3;BABAM2;RNF115;DDB2;TRIM17;UBE3D;TRAF2;LRSAM1;RAD18;TRIM11;MDM2;BARD1;RNF4;NFX1;TRAF6;RNF213;MARCHF5;RNF185;UHRF2;OBI1;BFAR;WWP2;PRKN;MARCHF7;CNOT4;RNF146;UBE2D3;CUL3;UBE3A;UBE2D2;RNF10;ERCC8;UBE2B;RNF8;KLHL24;RNF13;ITCH;TRIM13;TRIM52;RNF41;UBE2A	vascular
219	GO_Biological_Process_2023__Regulation Of DNA-templated Transcription Elongation (GO:0032784)	0.307426	2.25804	0	0.0226356	0.441	36/42	47.94%	TSFM;INTS13;EAF2;THOC5;DDX39B;INTS3;ELL;SRCAP;INTS2;INTS7;INTS6;INTS9;CCNT1;WDR43;INTS10;KAT7;INTS14;INTS8;INTS4;SETD5;CCNK;THOC1;CCNT2;ZMYND11;ZNF326;SCAF8;WDR82;ZC3H4;ERCC6;SUPT16H;INTS12;CCAR2;INTS11;SUPT5H;HMGN1;INTS1	vascular
220	GO_Biological_Process_2023__Synaptic Vesicle Cycle (GO:0099504)	-0.414839	-2.25347	0.00131926	0.00223077	0.34	21/36	26.64%	RAB3A;SNAP25;STX1A;SYNDIG1;SLC17A8;CDK5;CPLX2;WNT7A;SLC17A6;VAMP2;SLC17A7;NLGN1;SNCA;BRSK1;SYT10;SLC32A1;OTOF;SLC18A2;PCLO;SYT7;RIMS1	vascular
221	GO_Biological_Process_2023__Double-Strand Break Repair Via Nonhomologous End Joining (GO:0006303)	0.323985	2.24924	0	0.0235081	0.46	39/40	63.57%	POLQ;UVRAG;POLM;POLL;POLB;XRCC4;PNKP;POLA1;RNF168;HELQ;SMC5;KDM2A;DCLRE1C;ATM;TP53BP1;NSMCE2;MRE11;XRCC5;PRKDC;PSMD14;ERCC8;RNF8;SMARCAL1;ERCC4;ERCC6;XRCC6;ZBTB7A;LIG4;DCLRE1A;IFFO1;PRPF19;HMGB1;HMGB2;ATP23;SETMAR;NHEJ1;PAXX;CYREN;ERCC1	vascular
222	GO_Cellular_Component_2023__Basement Membrane (GO:0005604)	-0.392427	-2.24748	0	0.00231878	0.355	27/45	26.94%	SMOC2;COL4A4;COL4A3;COL15A1;APLP1;CCDC80;TNC;FREM3;COL4A5;P3H2;LAMA2;LAMA1;PXDN;NID1;ANG;NID2;COL23A1;FBN1;HMCN1;SMOC1;COL4A6;COL8A2;LAMA3;COLQ;THBS4;CD151;AGRN	vascular
223	GO_Biological_Process_2023__Regulated Exocytosis (GO:0045055)	-0.38475	-2.24564	0	0.00236778	0.365	27/49	26.64%	RAB3A;CRHBP;SYT13;SNAP25;STX1A;SCIN;SYT15;CDK5;CPLX2;SYNGR3;RAB26;VAMP2;PLEK;SYT9;SNCA;SYNGR1;SYT10;RIMS3;SYT6;CLTRN;OTOF;TPH1;SYT17;SYT3;STEAP2;PCLO;RIMS1	vascular
224	GO_Biological_Process_2023__Positive Regulation Of ERK1 And ERK2 Cascade (GO:0070374)	-0.280949	-2.24074	0	0.00250135	0.38	71/148	27.20%	IGF1;SLC30A10;CSF1R;ANGPT1;HTR2A;PDGFRB;PTPRC;MUSK;SCIMP;NTRK3;CD44;PDGFRA;BMP2;FGF1;CCL4;CCL26;RASGRP1;FSHR;CCL5;NTRK1;GPNMB;CD4;CCL2;DDT;THPO;NODAL;FGFR2;NDRG4;PDGFD;TNFAIP8L3;HTR2C;PYCARD;ERBB4;APOE;CIB1;SLAMF1;FGF10;GLIPR2;PLA2G5;C5AR1;ROR1;NPNT;PRKCZ;CCL24;CCN2;PHB2;SEMA7A;GPER1;NELL1;HTR2B;NRG1;ARRB1;PDGFA;CD74;CHRNA7;NTRK2;FFAR4;CD36;ADCYAP1;HRAS;SPRY2;CCL20;DDR2;NOTCH2;CXCL17;MT3;OPRM1;FG…	vascular
225	KEGG_2021_Human__Arrhythmogenic right ventricular cardiomyopathy	-0.334919	-2.23883	0	0.00253941	0.385	44/76	30.60%	DES;ITGA11;ITGA7;CACNA2D2;CACNB2;CTNNA3;ACTN2;SLC8A2;ITGA4;CACNG3;CACNG4;DMD;CACNA2D3;CACNA1S;SGCA;PKP2;CACNG8;LAMA2;SGCG;CACNA1F;CACNB1;LAMA1;DSG2;CACNG7;CACNA2D4;ITGB8;CTNNA2;CACNG5;RYR2;SLC8A1;SLC8A3;CACNG2;SGCD;JUP;ATP2A3;CACNA1D;ACTG1;ACTB;ACTN3;DSC2;ITGA10;SGCB;CACNG1;EMD	vascular
226	GO_Biological_Process_2023__Positive Regulation Of MAPK Cascade (GO:0043410)	-0.25647	-2.23697	0	0.00257706	0.393	126/268	29.29%	PLCE1;IGF1;DIRAS2;SLC30A10;PIK3CG;CSF1R;ANGPT1;HTR2A;DIRAS1;PDGFRB;PTPRC;EDN3;THBS1;MUSK;SCIMP;GPR37;NTRK3;CD44;PDGFRA;BMP2;FGF1;ADRA2A;CCL4;LPAR1;INAVA;CCL26;RASGRP1;FSHR;CCL5;NTRK1;GPNMB;IGF2;CD4;LIF;DOK6;CCL2;DDT;ADRA2B;THPO;NODAL;IL34;FGFR2;CD24;NDRG4;IGFBP6;LAPTM5;PDGFD;KIT;TNFAIP8L3;BMP4;ADRA1B;HTR2C;CARTPT;ROBO1;ADAM8;PPIA;WWC1;DOK2;PYCARD;ERBB4;GRM4;APOE;CIB1;IL1B;SLAMF1;FGF10;GLIPR2;TDGF…	vascular
227	WikiPathway_2023_Human__Purinergic Signaling WP4900	-0.44072	-2.23413	0	0.00264686	0.404	15/30	14.68%	P2RY14;P2RY13;P2RY12;ADORA2B;P2RX5;ADORA1;P2RX3;GNAZ;ADORA2A;ADORA3;GNAO1;P2RX1;P2RX6;GNAI1;LPAR4	vascular
228	GO_Molecular_Function_2023__aminoacyl-tRNA Ligase Activity (GO:0004812)	0.311982	2.23374	0	0.0256413	0.493	32/37	49.74%	WARS1;PARS2;MARS2;FARSB;YARS2;WARS2;YARS1;HARS2;TARS2;TARS3;DARS2;NARS2;CARS2;LARS2;TARS1;IARS1;RARS2;FARS2;DARS1;LARS1;CARS1;HARS1;RARS1;EPRS1;IARS2;SARS1;KARS1;GARS1;MARS1;QARS1;EARS2;AARS2	vascular
229	WikiPathway_2023_Human__Nonalcoholic Fatty Liver Disease WP4396	-0.288536	-2.23358	0	0.00264188	0.404	68/143	28.88%	NDUFA4L2;COX4I2;PIK3CD;NDUFA4;NDUFS5;NDUFC2;PRKAA2;CYC1;UQCRH;NDUFB10;NDUFS7;DDIT3;NDUFB8;CCL2;COX8A;NDUFB7;NDUFB5;NDUFA1;COX5A;SDHD;COX6B1;COX7C;NDUFB11;NDUFA8;COX6A1;COX5B;UQCR10;COX4I1;CYCS;COX7A2;NDUFS3;IRS1;NDUFA13;UQCRB;COX7B;NDUFB2;IL1B;JUN;NR1H4;UQCRQ;NDUFAB1;NDUFA2;COX6A2;NDUFB9;NDUFB3;COX6C;NDUFA11;NDUFC2-KCTD14;BAX;UQCR11;NDUFA7;CYP2E1;COX7A1;CEBPA;BBC3;MLXIP;PIK3R2;UQCRHL;UQCRFS1;IRS2…	vascular
230	WikiPathway_2023_Human__Serotonin And Anxiety WP3947	-0.550161	-2.23216	0	0.00268298	0.409	12/17	24.52%	CRH;HTR1A;HTR2A;GABRA1;ADRA1A;HTR2C;PLEK;CAMK2B;POMC;FOS;GRM1;ARC	vascular
231	KEGG_2021_Human__cAMP signaling pathway	-0.274625	-2.23027	0	0.00272364	0.418	98/197	31.02%	SST;RAC3;PLCE1;HTR1A;ATP1A3;HTR1F;CNGA1;PDE3A;EDNRA;EDN3;ATP1B1;PIK3CD;ADCYAP1R1;ADCY5;CALM3;ATP1A2;NPY;ADORA1;CHRM1;DRD1;NPPA;ATP2B3;GRIN1;MYL9;GRIN3A;SSTR2;GRIA4;FSHR;CALML4;GABBR1;ATP1A4;NPY1R;MAPK10;GABBR2;CALM1;CACNA1S;CAMK2A;ADCY1;ATP1B2;CALM2;FXYD1;ADORA2A;ATP2B2;CHRM2;PAK1;GRIN2C;PLD1;CAMK2B;RAC2;CREB3L1;CACNA1F;CAMK4;PLN;HCN2;GNAI1;JUN;CFTR;ADCY8;POMC;GRIA1;FOS;PTGER3;DRD5;GRIN2B;FXYD2;R…	vascular
232	WikiPathway_2023_Human__Common Pathways Underlying Drug Addiction WP2636	-0.403207	-2.22777	0.00127389	0.00280029	0.43	21/40	24.53%	GJB1;DRD1;GRIN1;GRIA4;ACTG2;PRKCG;PPP1R1A;CALM1;CAMK2A;ADCY1;CAMK4;GNAI1;ADCY8;GRIA1;GRIA2;GRIN2A;DRD4;GRM5;GRM1;ACTG1;ACTB	vascular
233	GO_Biological_Process_2023__Nuclear-Transcribed mRNA Catabolic Process (GO:0000956)	0.23171	2.22475	0	0.0264734	0.508	67/84	48.21%	ZC3H12D;CNOT6L;DHX34;PATL2;PNLDC1;CNOT8;ZFP36;DCP1B;SAMD4A;ERI1;SMG1;CTIF;SMG5;TNKS1BP1;UPF3A;SMG6;CNOT9;PATL1;XRN2;EXOSC10;CNOT10;CNOT11;DCP1A;SMG9;ATM;DIS3L2;XRN1;DCP2;TUT7;NCBP1;NBDY;DDX5;CNOT1;RC3H2;CNOT2;UPF2;CNOT4;NBAS;HBS1L;TUT4;TENT2;PARN;GSPT1;RC3H1;THRAP3;CNOT6;EIF3E;SMG7;PYM1;MAGOH;TENT4B;EXOSC8;SAMD4B;UPF3B;UPF1;RNPS1;MTPAP;EXOSC9;PDE12;PAN2;EXOSC7;CNOT7;EXOSC6;MAGOHB;CSDE1;DCPS;CNOT3	vascular
234	KEGG_2021_Human__JAK-STAT signaling pathway	0.213693	2.22387	0	0.0260255	0.508	42/122	17.06%	IL6;CSF3;AOX1;PIK3R3;OSMR;IL4R;IL19;EGF;SOCS3;IL15RA;IL20RB;IL27RA;IFNGR1;IFNLR1;JAK3;CSF2RB;IL2RG;IL3RA;SOCS2;IL12A;LEPR;CDKN1A;CNTF;STAT3;IL6R;CSF2RA;GHR;CNTFR;MYC;IFNAR2;STAT5A;PTPN6;IL2RA;IL15;IL10RB;EGFR;IL13RA1;LIFR;MCL1;JAK2;PIAS2;IFNAR1	vascular
235	GO_Biological_Process_2023__Heart Contraction (GO:0060047)	-0.410741	-2.22095	0	0.00297579	0.449	27/38	35.46%	SCN2B;ATP1B1;CASQ2;ATP1A2;SCN4B;MYLK2;MYL3;DMD;SCN3B;ACTC1;KCNH2;SGCG;SOD1;RYR2;SLC8A1;SGCD;SCN1B;TTN;TNNT2;SGCZ;GAA;TNNI3;MYL4;TRDN;RANGRF;TNNC1;MYH7	vascular
236	KEGG_2021_Human__Adrenergic signaling in cardiomyocytes	-0.285383	-2.21338	0	0.00320802	0.473	57/141	21.62%	PIK3CG;ATP1A3;CACNA2D2;ATP1B1;BCL2;ADCY5;CALM3;ATP1A2;CACNB2;SCN7A;ATP2B3;AGTR1;SCN4B;PPP2R2C;CALML4;MYL3;SLC8A2;ATP1A4;PPP1R1A;CACNG3;ADRA1A;CACNG4;CACNA2D3;CALM1;CACNA1S;CAMK2A;ADCY1;ATP1B2;CALM2;ATP2B2;CACNG8;ADRA1B;ACTC1;CAMK2B;CREB3L1;CACNA1F;CACNB1;PLN;GNAI1;CACNG7;CACNA2D4;ADCY8;PIK3R5;PIK3R6;PLCB2;CACNG5;FXYD2;PPP2R2B;RYR2;SLC8A1;SLC8A3;CACNG2;SCN1B;ATP2A3;TPM2;CACNA1D;ADCY7	vascular
237	GO_Biological_Process_2023__NADH Dehydrogenase Complex Assembly (GO:0010257)	-0.366474	-2.21328	0	0.00318369	0.474	31/53	34.09%	NDUFAF3;NDUFS5;NDUFC2;NDUFB10;NDUFS7;NDUFB8;NDUFB7;NDUFAF8;NDUFB5;NDUFA1;NDUFB11;NDUFA8;NDUFS3;NDUFA13;NDUFB2;DMAC1;NDUFAB1;TMEM186;NDUFA2;NDUFB9;NDUFB3;NDUFA11;NDUFS8;NDUFA3;NDUFA6;NDUFC1;NDUFAF4;NDUFB1;BCS1L;NDUFA5;NDUFB4	vascular
238	GO_Biological_Process_2023__Mitochondrial Respiratory Chain Complex I Assembly (GO:0032981)	-0.366474	-2.21328	0	0.00318369	0.474	31/53	34.09%	NDUFAF3;NDUFS5;NDUFC2;NDUFB10;NDUFS7;NDUFB8;NDUFB7;NDUFAF8;NDUFB5;NDUFA1;NDUFB11;NDUFA8;NDUFS3;NDUFA13;NDUFB2;DMAC1;NDUFAB1;TMEM186;NDUFA2;NDUFB9;NDUFB3;NDUFA11;NDUFS8;NDUFA3;NDUFA6;NDUFC1;NDUFAF4;NDUFB1;BCS1L;NDUFA5;NDUFB4	vascular
239	GO_Molecular_Function_2023__Phosphatidylcholine Transporter Activity (GO:0008525)	0.455432	2.21256	0.00310559	0.0276256	0.535	11/17	19.14%	ATP10A;ABCB1;PITPNC1;ABCA7;MTTP;PITPNM2;ATP8B2;ABCG1;PCTP;ABCA3;ATP8B1	vascular
240	GO_Biological_Process_2023__Oligodendrocyte Development (GO:0014003)	-0.552988	-2.21176	0	0.00322495	0.48	10/16	19.89%	PLP1;TPPP;ZNF488;SOX10;MYRF;HES5;CNTNAP1;PRDM8;GPM6B;B4GALT6	vascular
241	GO_Molecular_Function_2023__Calcium Ion Binding (GO:0005509)	-0.251744	-2.20495	0	0.00342025	0.5	154/291	35.09%	PCP4;SNCB;SYT4;CASQ1;SMOC2;TUBB4A;SYT13;CPNE6;FBLN1;CLGN;ASPN;CDK5R1;THBS1;CLXN;CALM3;CASQ2;SCIN;GUCA1C;SYT5;RCAN3;HRC;CALB1;SYT15;LTBP4;CALB2;CABCOCO1;GRIN1;MYL9;DNER;PKD2L1;RASGRP1;CALML4;KCNIP1;CDH6;CD320;PCDHB8;CDH7;KCNIP3;CLEC3B;FER1L5;MEX3B;TNFAIP6;TESC;CALM1;ITIH1;SLIT2;CDH8;CALM2;LRP1;PRF1;HPCAL4;AOAH;S100B;SYT1;NCS1;ADAM8;CLEC4E;CDH12;RPH3A;AIF1;DHH;GJB2;CDH3;SYT9;CETN2;S100A6;DSG2;SNCA;…	vascular
242	KEGG_2021_Human__Cholinergic synapse	-0.298905	-2.20151	0	0.00353452	0.512	49/108	24.61%	GNG3;KCNJ4;PIK3CG;GNG2;KCNQ4;BCL2;PIK3CD;CHRM4;ADCY5;CHRM1;GNG8;GNB3;PRKCG;GNGT1;CACNA1S;CAMK2A;ADCY1;KCNQ2;KCNJ6;CHRM2;CHRNA4;GNG13;KCNJ12;CAMK2B;CREB3L1;GNAO1;CACNA1F;CAMK4;GNAI1;CHRNB2;ADCY8;KCNQ3;PIK3R5;PIK3R6;PLCB2;FOS;KCNQ5;KCNJ3;CHRNB4;CHRNA7;CHRM5;GNG11;CACNA1D;ADCY7;HRAS;PIK3R2;CACNA1B;ITPR1;ACHE	vascular
243	GO_Biological_Process_2023__Cardiac Conduction (GO:0061337)	-0.391415	-2.2015	0	0.00351658	0.512	26/44	26.97%	SCN2B;KCNE4;CACNA1G;CACNB2;SCN4B;CTNNA3;HCN3;KCNA5;SCN3B;PKP2;KCNH2;KCNE3;ANK2;DSG2;HCN1;HCN2;SLC4A3;KCNH6;KCNJ3;JUP;SCN1B;KCND3;CACNA1D;HCN4;SPTBN4;DSC2	vascular
244	GO_Biological_Process_2023__Embryonic Organ Morphogenesis (GO:0048562)	-0.429611	-2.2004	0	0.00355097	0.516	20/32	26.12%	MESP1;PDGFRA;SIX1;SOX11;ALX1;SIX2;ALDH1A3;MFAP2;FGFR2;DSCAML1;HES1;RBPMS2;MFAP5;RYR2;FBN1;FBN2;SOX17;ID2;HOXB3;FUZ	vascular
245	GO_Biological_Process_2023__Regulation Of Heart Rate By Cardiac Conduction (GO:0086091)	-0.41123	-2.20034	0	0.00353313	0.516	22/39	21.57%	SCN2B;KCNE4;CACNA1G;CACNB2;SCN4B;CTNNA3;HCN3;KCNA5;SCN3B;PKP2;KCNH2;KCNE3;ANK2;DSG2;HCN1;HCN2;KCNH6;KCNJ3;JUP;SCN1B;KCND3;CACNA1D	vascular
246	GO_Biological_Process_2023__Generation Of Neurons (GO:0048699)	-0.277072	-2.19702	0	0.00363164	0.525	88/153	38.83%	CCK;EMX1;FZD10;FZD2;CDK5R1;RUNX3;SIX1;SOX11;DCX;WNT16;WNT6;CDK5;MET;DNER;KIAA0319;ITM2C;RUNX2;IL1RAPL1;GPM6A;MARK1;MAPT;FGF13;WNT7A;WNT10B;INSM1;SNPH;WNT10A;RNF112;ATP2B2;WNT5A;TRIM46;WNT2;MDGA1;ASCL1;ANOS1;MYT1L;CELSR1;SPOCK1;PIN1;BRSK1;NLGN4X;NDNF;SEMA3A;PTPRD;WNT3;WNT4;ASTN1;DCC;NELL1;SH3RF1;IER2;VXN;FUT9;NTRK2;LMX1A;NRCAM;LRP4;FZD7;SEPTIN4;CTF1;WNT11;DCDC2;SHH;LMX1B;BRSK2;RTN3;EMX2;RELN;WNT5B…	vascular
247	GO_Biological_Process_2023__Sensory Perception Of Mechanical Stimulus (GO:0050954)	-0.32328	-2.19564	0	0.00369492	0.532	41/80	26.22%	CRYM;SNAI2;COL4A3;EYA1;USH1C;MYO7A;LHFPL4;LOXHD1;TSPEAR;COL1A1;TIMM10;BIRC5;TFAP2A;PAX3;MYO3A;ATP2B2;TIMM13;WHRN;PCDH15;LHFPL3;CHRNB2;GSDME;SOD1;NDUFB9;PIEZO2;ATP6V0A4;TIMM8B;MYO7B;ROR1;POU3F4;COL11A1;COL2A1;CLIC5;CACNA1D;PDZD7;PJVK;CEMIP;DCDC2;TMIE;LRP2;SPTBN4	vascular
248	KEGG_2021_Human__Axon guidance	-0.270647	-2.19543	0	0.00369367	0.535	82/179	28.27%	RAC3;L1CAM;TRPC3;PIK3CD;EFNA3;SEMA3D;SEMA3C;SLIT3;SEMA5A;PAK6;TRPC4;MYL9;CDK5;BMPR1B;MET;SEMA4D;SEMA3G;GDF7;UNC5C;EFNA5;EPHB6;CAMK2A;EPHB3;NTN1;SLIT2;PARD6A;UNC5A;PLXNB3;DPYSL5;PLXNA4;ROBO1;WNT5A;UNC5D;LRRC4;PAK1;CAMK2B;NGEF;RAC2;SEMA6D;NTNG2;SEMA5B;SRGAP3;CFL1;CXCL12;TRPC6;GNAI1;RGMA;MYL5;PARD6G;EPHA5;SEMA3A;PAK3;WNT4;EFNB3;DCC;PLXNC1;PRKCZ;SEMA7A;LRRC4C;EPHB1;SEMA3E;TRPC5;NFATC4;SMO;NTNG1;EPHA1…	vascular
249	WikiPathway_2023_Human__Mitochondrial Complex IV Assembly WP4922	-0.436284	-2.1944	0	0.00371363	0.538	16/31	17.71%	NDUFA4;COX14;PET117;COA3;COX8A;COX5A;COX6B1;COX7C;COX6A1;COX5B;COX4I1;COX7A2;COA6;COX7B;COX6C;PNKD	vascular
250	GO_Biological_Process_2023__Positive Regulation Of Reactive Oxygen Species Metabolic Process (GO:2000379)	-0.377505	-2.19158	0	0.0038051	0.549	28/45	32.08%	PID1;SYK;PDGFRB;THBS1;AGTR1;GRIN1;CLEC7A;MAPT;CD177;ITGAM;GSTP1;TYROBP;ZC3H12A;ITGB2;SOD1;DCXR;ROMO1;CBR1;CYBA;CD36;SLC5A3;ADGRB1;AGT;TLR4;GADD45A;TLR6;PDGFB;F2RL1	vascular
251	GO_Biological_Process_2023__Positive Regulation Of Biomineral Tissue Development (GO:0070169)	-0.392545	-2.19154	0.00131926	0.00378654	0.549	25/41	29.07%	PTN;BMP2;WNT6;BMPR1B;ISG15;FZD9;BMPR1A;TFAP2A;BMP4;GPM6B;SLC8A1;WNT4;NELL1;FBN2;PKDCC;AMELX;TMEM119;CEBPB;PTH;P2RX7;BMP7;SLC20A2;KL;ODAPH;ATRAID	vascular
252	KEGG_2021_Human__Renin secretion	-0.340437	-2.19142	0.00120482	0.00376816	0.549	30/63	22.51%	CLCA4;PDE3A;EDNRA;EDN3;GUCY1B1;ADCYAP1R1;ADCY5;CALM3;ADORA1;NPPA;AGTR1;GUCY1A2;CALML4;GUCY1A1;PDE1A;CALM1;CACNA1S;CALM2;PDE1C;ACE;CACNA1F;PTGER4;GNAI1;AQP1;PLCB2;KCNMA1;PRKG2;CACNA1D;ADCYAP1;REN	vascular
253	KEGG_2021_Human__Dilated cardiomyopathy	-0.310069	-2.18859	0.00118064	0.00383726	0.56	51/91	30.84%	IGF1;DES;ITGA11;ITGA7;CACNA2D2;ADCY5;CACNB2;MYL3;SLC8A2;ITGA4;CACNG3;CACNG4;DMD;CACNA2D3;CACNA1S;ADCY1;SGCA;CACNG8;LAMA2;ACTC1;SGCG;CACNA1F;CACNB1;PLN;LAMA1;CACNG7;CACNA2D4;ADCY8;ITGB8;CACNG5;RYR2;SLC8A1;SLC8A3;CACNG2;SGCD;ATP2A3;TPM2;CACNA1D;ADCY7;TTN;ACTG1;ACTB;TNNT2;AGT;ITGA10;TNNI3;SGCB;CACNG1;TGFB3;EMD;ADRB1	vascular
254	GO_Biological_Process_2023__Memory (GO:0007613)	-0.357866	-2.18824	0	0.00384364	0.56	25/56	19.41%	SHISA7;MUSK;SLC6A1;PTN;CALB1;SLC8A2;RASGRF1;SLC2A4;MAPT;FGF13;PLK2;NETO1;CAMK2N1;LRCH4;CAMK4;APOE;CHRNB2;SHANK1;ADCY8;CUX2;RGS14;SLC8A3;MAP1A;NFATC4;CHRNA7	vascular
255	GO_Biological_Process_2023__Neuron Migration (GO:0001764)	-0.364413	-2.1878	0	0.00382937	0.561	34/54	38.29%	CCK;CDK5R1;DCX;CDK5;DNER;KIAA0319;GPM6A;MARK1;FGF13;TRIM46;MDGA1;CELSR1;SPOCK1;NDNF;SEMA3A;ASTN1;DCC;NELL1;SH3RF1;SEMA3E;NTRK2;NRCAM;SEPTIN4;DCDC2;SOX1;VEGFA;RELN;MAP1B;SEPTIN14;DDIT4;ASTN2;NR4A2;POMGNT2;TUBB2B	vascular
256	GO_Biological_Process_2023__Synaptic Vesicle Exocytosis (GO:0016079)	-0.401643	-2.18737	0.00129032	0.00381933	0.561	23/39	26.64%	RAB3A;SYT4;STX1B;SNAP25;STX1A;RIMS4;SYT5;CDK5;CPLX2;SNPH;VAMP2;SYT1;SNCA;SYT10;UNC13C;RIMS3;PRRT2;OTOF;SYT2;PCLO;SYT7;STX19;RIMS1	vascular
257	GO_Biological_Process_2023__Chloride Transmembrane Transport (GO:1902476)	-0.376852	-2.18625	0	0.00384201	0.565	27/48	26.00%	ANO3;GABRA1;GABRA5;GLRA2;SLC6A1;SLC1A3;GABRE;SLC4A8;GABRG2;ANO4;SLC12A5;GLRA1;GABRA4;SLC26A9;GLRB;CLCN1;CFTR;GABRB2;GLRA3;SLC12A7;GABRA6;GABRG3;SLC5A1;SLC12A1;GABRB3;GABRB1;GABRG1	vascular
258	GO_Biological_Process_2023__Central Nervous System Development (GO:0007417)	-0.2535	-2.18355	0	0.00393755	0.573	126/261	33.67%	CX3CR1;EMX1;TAGLN3;ECRG4;UGT8;CDK5R2;CDK5R1;MELTF;NNAT;FOXG1;SOX4;KLK6;ROGDI;SLC6A17;APLP1;SCIN;EGR2;SOX11;DCX;TPPP;CNTN4;PCDH18;GRIN1;C3;CDK5;C1QA;MEIS1;POU3F3;POU6F2;DNER;SH3GL3;NPAS1;NHLH2;MOG;NPTX1;CNTN1;VIT;MSI1;SOX10;AMIGO2;IER3IP1;NDRG4;HPCAL4;S100B;ADORA2A;EEF1AKMT4-ECE2;MYRF;APOD;ITGAM;CNTN6;HES5;GRIN2C;IL1RAPL2;MAST1;GSTP1;MAL;MDGA1;CA10;TBR1;COX7B;DSCAML1;ADAM23;PAFAH1B3;PPP1R17;SPINK5…	vascular
259	KEGG_2021_Human__Cell adhesion molecules	-0.285365	-2.18217	0	0.00396755	0.575	74/138	30.16%	CLDN16;MAG;CLDN7;L1CAM;PTPRC;CD86;CD8A;CD8B2;CD22;CNTN2;SDC2;HLA-G;NLGN4Y;CD4;CLDN1;ITGA4;CNTN1;LRRC4B;CLDN20;NECTIN1;NLGN1;CLDN11;ITGAM;LRRC4;CD28;CNTNAP1;NEGR1;NRXN2;HLA-C;NTNG2;CDH3;MPZ;CLDN18;HLA-DQB1;NCAM1;CDH1;NCAM2;VCAN;ITGB8;NLGN4X;ITGB2;NFASC;CD276;JAM3;HLA-B;PTPRF;ICAM3;LRRC4C;SDC1;IGSF11;CD6;HLA-A;NTNG1;NLGN3;CADM3;NRCAM;CD8B;CLDN5;ICOSLG;HLA-DRA;ICAM2;ALCAM;CADM1;CLDN4;SIGLEC1;SELPLG;…	vascular
260	GO_Molecular_Function_2023__Oxidoreductase Activity, Acting On Single Donors With Incorporation Of Molecular Oxygen, Incorporation Of Two Atoms Of Oxygen (GO:0016702)	0.420357	2.18114	0.00343643	0.0331936	0.598	10/20	9.93%	PTGS2;ALOX5;PTGS1;ALOX15B;HGD;BCO1;ALOX12B;HPD;IDO1;PIR	vascular
261	GO_Biological_Process_2023__Neurotransmitter Secretion (GO:0007269)	-0.384982	-2.17712	0	0.00422648	0.601	26/42	30.30%	RAB3A;SNAP25;STX1A;LIN7A;HRH3;CDK5;CPLX2;SYN2;SYN1;SNPH;VAMP2;SYT1;NRXN2;RPH3A;GRM4;SNCA;SYT10;SLC32A1;PDZD11;OTOF;DOC2A;PCLO;RIMS1;LIN7B;NRXN1;UNC13A	vascular
262	GO_Molecular_Function_2023__Nuclear Thyroid Hormone Receptor Binding (GO:0046966)	0.357105	2.17619	0.00334448	0.0335642	0.607	27/27	64.35%	TACC1;NCOA3;MED17;JMJD1C;NSD1;GTF2H1;NCOA6;MED4;GTF2B;TRIP12;MED13;NCOR1;THRAP3;PRMT2;TAF11;HMGN3;BRD8;MED12;MED1;MED30;TAF7;MED16;TRIP6;MED22;GAS2L1;OASL;ZNHIT3	vascular
263	GO_Biological_Process_2023__Negative Regulation Of Cell Projection Organization (GO:0031345)	-0.369017	-2.17307	0	0.00437094	0.614	26/50	24.60%	STX1B;MAG;STMN2;ZNF365;LPAR1;MINAR1;RTN4RL2;ITM2C;RTN4R;DPYSL5;PTPRS;TNR;APOE;CIB1;DPYSL3;SPOCK1;YWHAH;GRIN2B;SEMA3A;PTPRO;DCC;CRMP1;SPRY2;RTN4RL1;MT3;GFI1	vascular
264	KEGG_2021_Human__Mineral absorption	-0.365477	-2.17286	0	0.00435867	0.615	29/53	25.50%	ATP1A3;ATP1B1;ATP1A2;MT1F;ATP2B3;SLC8A2;ATP1A4;TRPV6;ATP1B2;FTH1;MT1G;ATP2B2;MT1E;SLC26A9;SLC46A1;TF;MT1M;FXYD2;SLC8A1;SLC8A3;MT2A;SLC5A1;STEAP1;SLC39A4;MT1X;STEAP2;FTL;SLC30A1;SLC40A1	vascular
265	GO_Molecular_Function_2023__Neuropeptide Hormone Activity (GO:0005184)	-0.496786	-2.17129	0.00141044	0.00442132	0.626	14/20	25.60%	CRH;GRP;CCK;PNOC;CORT;PENK;NPY;SPX;NPPA;NPFF;NMB;GAL;VIP;OXT	vascular
266	GO_Molecular_Function_2023__Neuropeptide Activity (GO:0160041)	-0.496786	-2.17129	0.00141044	0.00442132	0.626	14/20	25.60%	CRH;GRP;CCK;PNOC;CORT;PENK;NPY;SPX;NPPA;NPFF;NMB;GAL;VIP;OXT	vascular
267	KEGG_2021_Human__Morphine addiction	-0.311642	-2.16993	0	0.00445614	0.631	44/89	26.00%	GNG3;GABRD;PDE3A;GNG2;GABRA1;GABRA5;ADCY5;PDE8B;ADORA1;DRD1;GABRE;KCNJ9;GNG8;GNB3;GABBR1;PDE7B;GABRG2;PRKCG;GNGT1;PDE1A;GABBR2;ADCY1;KCNJ6;PDE1C;GABRA4;GNG13;GNAO1;GNAI1;GABRB2;ADCY8;GABRQ;GABRA6;SLC32A1;GABRG3;KCNJ3;ARRB1;GNG11;ADCY7;GABRB3;CACNA1B;OPRM1;GABRB1;GNG10;GABRG1	vascular
268	GO_Biological_Process_2023__Nuclear-Transcribed mRNA Catabolic Process, Deadenylation-Dependent Decay (GO:0000288)	0.311296	2.16752	0	0.0347121	0.626	35/38	56.76%	CNOT6L;PATL2;PNLDC1;CNOT8;ZFP36;DCP1B;SAMD4A;TNKS1BP1;CNOT9;PATL1;CNOT10;CNOT11;DCP1A;DCP2;TUT7;RC3H2;CNOT2;CNOT4;DIS3;TUT4;PARN;RC3H1;CNOT6;EXOSC8;SAMD4B;EXOSC9;PDE12;PAN2;EXOSC7;CNOT7;DCPS;CNOT3;EXOSC3;EXOSC2;NT5C3B	vascular
269	GO_Biological_Process_2023__Detection Of Chemical Stimulus Involved In Sensory Perception (GO:0050907)	-0.45023	-2.16567	0	0.0047058	0.644	25/27	48.32%	PKD2L1;OR2A42;OR2L5;OR2L2;OR2G6;OR2L3;SLC24A4;OR2F1;OR6A2;OR2B11;OR10H5;OR2A14;OR2A12;OR5V1;OR2AG2;OR2A25;OR2M4;OR2M3;OR10AC1;OR2M2;OR2A5;OR2L13;OR2H2;OR2A1;OR10G3	vascular
270	KEGG_2021_Human__Glutamatergic synapse	-0.301065	-2.15971	0	0.00499603	0.666	65/109	36.98%	GNG3;GRM3;GRM8;GNG2;ADCY5;SLC1A6;SLC1A3;SLC17A8;GRIN1;GNG8;GRIN3A;GNB3;GRIA4;PRKCG;GNGT1;SLC38A1;ADCY1;SLC17A6;SLC17A7;GNG13;GRIN2C;PLD1;GNAO1;GRM4;GNAI1;SHANK1;ADCY8;PLCB2;GRIA1;GRIN2B;GRIK4;GRIA2;GRIN2A;KCNJ3;GRIK3;GLS2;GNG11;CACNA1D;ADCY7;JMJD7-PLA2G4B;SLC38A3;GRM5;GRIK1;DLG4;GRM1;ITPR1;GNG10;GRIN2D;HOMER3;GRIA3;DLGAP1;GNB2;SHANK2;GRIK2;CACNA1A;GRIK5;GRM7;GNB5;GRK3;SLC1A2;PPP3R1;GRM2;GLUL;ADCY…	vascular
271	GO_Biological_Process_2023__Positive Regulation Of Smooth Muscle Cell Migration (GO:0014911)	-0.540174	-2.15836	0	0.00503942	0.669	13/16	31.82%	IGF1;PDGFRB;CCN4;FGF9;CCL5;DOCK5;IGFBP5;AIF1;S100A11;NELL1;MDK;VTN;PDGFB	vascular
272	WikiPathway_2023_Human__Peptide GPCRs WP24	-0.353127	-2.15629	0.00125	0.0051326	0.682	43/54	44.55%	CX3CR1;AVPR1A;NPY5R;EDNRA;CCKBR;AGTR1;SSTR2;MC4R;TACR3;FSHR;GNRHR;GALR1;NPY1R;CXCR5;NTSR1;SSTR3;CCR10;C3AR1;TACR1;C5AR1;CXCR6;GRPR;FPR1;OPRD1;BDKRB2;SSTR1;TSHR;OPRM1;FPR3;NMBR;NPY2R;CCR2;CCR1;CCR7;HCRTR1;OPRL1;TRHR;CCR5;FPR2;TACR2;CXCR3;ATP8A1;CXCR2	vascular
273	GO_Biological_Process_2023__Neuron Projection Development (GO:0031175)	-0.269503	-2.15496	0	0.00517884	0.688	85/181	31.69%	STMN1;STMN4;TUNAR;NEUROD6;PLP1;L1CAM;STMN2;CDK5R1;USH1C;DOCK10;NPY;ZNF365;OLIG2;CNTN4;OLIG1;CDK5;TMEM108;MGARP;GAS7;RASGRF1;PACSIN1;GPM6A;OMG;MAPT;BHLHE22;WNT7A;GPRIN3;NEFH;NEUROD2;EPHB3;UNC5A;NMNAT2;NLGN1;NYAP2;TNIK;SHTN1;PAK1;CNTNAP1;MANF;UBB;WHRN;SRGAP3;APOE;BLOC1S1;SAMD14;EPB41L3;SHANK1;NYAP1;LGI1;GPM6B;SVBP;NBL1;MYO16;STMN3;PAK3;FLRT3;NCKAP1L;CTNND2;PQBP1;EPHB1;GPRIN2;RAB6B;SH3GL2;ADGRF1;MNX…	vascular
274	GO_Molecular_Function_2023__Glutamate Receptor Activity (GO:0008066)	-0.542835	-2.15427	0	0.00518642	0.689	14/16	35.75%	GRM3;GRM8;GRID1;GRIN3A;GRIA4;GRID2;GRM4;GRIA2;GRIK3;GRM5;GRM1;GRIN2D;GRM7;GRM2	vascular
275	WikiPathway_2023_Human__Sudden Infant Death Syndrome SIDS Susceptibility Pathways WP706	-0.275428	-2.15387	0	0.0051787	0.69	84/146	39.16%	SST;TAC1;PLP1;HTR1A;ATP1A3;HTR2A;KCNJ8;GABRA1;SNAP25;RUNX3;ADCYAP1R1;AR;SLC1A3;TPPP;GRIN1;SCN4B;GNB3;SSTR2;FMO3;VAMP2;SLC25A4;SCN3B;CHRM2;CHRNA4;KCNH2;HES5;ASCL1;HES1;IL1B;TF;JUN;CHRNB2;YWHAH;TACR1;TSPYL1;MYB;RYR2;CHRNB4;VIPR2;CHRNA7;GAPDH;NTRK2;DLX2;GATA3;ADCYAP1;TPH1;NKX2-2;SOX2;SSTR1;SNTA1;LMX1B;BHLHE40;PPARGC1B;PRKAR1B;DDC;TPH2;HDAC9;VIPR1;EGR1;GCK;TH;BDNF;VEGFA;CEBPB;TP73;PRKAR2B;YWHAB;CDCA7…	vascular
276	GO_Biological_Process_2023__Response To Cytokine (GO:0034097)	0.211003	2.1537	0	0.0372534	0.653	50/117	23.28%	CSF3;SELE;OSMR;SELP;TNFRSF11A;TMEM102;KYNU;FLT3;CXCR4;IKBKE;CHI3L1;AFF3;ASAH2;MX2;IRAK3;IFNLR1;JAK3;CIITA;LAMP3;IRAK2;IL6R;GCH1;PLSCR1;SELL;CASP8;IL1R1;CH25H;LGALS9;IFNAR2;RELB;TRIM32;LIFR;PML;CD40;MCL1;JAK2;LEF1;IL6ST;SP100;NFKB2;KLHL20;HDAC4;TIMP3;ADAM9;CASP3;REL;PRKCA;MAPKAPK3;TRIM56;RIPK1	vascular
277	GO_Biological_Process_2023__Regulation Of Cardiac Muscle Contraction By Regulation Of The Release Of Sequestered Calcium Ion (GO:0010881)	-0.524699	-2.15303	0	0.00522033	0.697	10/16	17.29%	CALM3;CASQ2;ATP1A2;HRC;FKBP1B;DMD;CALM1;CALM2;RYR2;SLC8A1	vascular
278	GO_Cellular_Component_2023__Endocytic Vesicle Membrane (GO:0030666)	-0.272391	-2.15236	0	0.00521631	0.698	82/149	36.37%	COLEC12;FZD2;WNT6;KIAA0319;GRIA4;HLA-G;TYRP1;CD4;CACNG3;WNT7A;CACNG4;CAMK2A;VAMP2;ATP6V0B;LRP1;RPS27A;SYT1;CACNG8;CHRM2;WNT5A;CLEC4E;CAMK2B;RAC2;HLA-C;B2M;UBB;GNAO1;SYT9;APOE;BTC;CFTR;FCGR1A;UBA52;ATP6V0A4;CD163;GRIA1;HLA-B;WNT3;WNT4;GRIA2;CACNG2;TGFA;APOB;SH3GL2;CD74;HLA-A;SMO;CYBA;STAB2;CD36;HBEGF;HLA-DRA;ATP6V0E2;IL7R;DLG4;ATP6V0C;SYT2;LRP2;MSR1;CALR;HLA-E;CSF3R;WNT5B;TFRC;HLA-F;GRIA3;ROR2;HLA…	vascular
279	GO_Biological_Process_2023__Gamma-Aminobutyric Acid Signaling Pathway (GO:0007214)	-0.497428	-2.15009	0.00143062	0.00529124	0.702	18/20	42.19%	SHISA7;GABRA1;GABRA5;GABRE;GABRG2;GABBR2;GABRA4;GABRB2;GABRA6;GABRG3;GABRB3;GABRB1;GABRG1;GPR156;GABRA2;GABRA3;GNAI2;SLC12A2	vascular
280	GO_Molecular_Function_2023__Calcium Channel Activity (GO:0005262)	-0.310196	-2.14949	0	0.00531313	0.704	40/87	23.58%	TRPA1;TRPC3;CACNA2D2;SLC24A3;CACNB2;TRPC4;GRIN1;PKD2L1;CACNG3;CACNG4;CACNA2D3;CACNA1S;TRPV6;NCS1;CACNG8;CACNA1E;CACNA1F;CACNB1;TRPV3;TRPC6;CACNG7;MCOLN3;CACNA2D4;SLC24A2;CACNA1I;TRPM5;TRPM3;CACNG5;RYR2;PKD1L2;SLC24A4;CACNG2;TRPM2;TRPC5;CHRNA7;TMC2;CACNA1D;CACHD1;CACNA1B;TRPV2	vascular
281	GO_Cellular_Component_2023__Cell-Cell Contact Zone (GO:0044291)	-0.371704	-2.14943	0	0.00529013	0.704	22/47	18.79%	OPALIN;DES;GJC1;ATP1B1;SCN4B;GJA5;FGF13;KCNA5;CXADR;FXYD1;PKP2;PAK1;ANK3;ANK2;DSG2;CADM4;AKAP6;YWHAH;JAM3;SLC8A1;JUP;SCN1B	vascular
282	WikiPathway_2023_Human__Complement System WP2806	0.238454	2.14816	0	0.0380605	0.667	30/77	15.97%	SELE;MASP1;CFB;CFI;CD93;C5AR2;SELP;ITGA2B;C7;LAMB1;ITGA2;TLR2;PTX3;F11;ITGB3;CPN1;ICAM1;VSIG4;LAMA5;CLEC4M;GNA15;C2;SELL;CD55;CD59;PLAUR;CFH;C5;CD40;C1S	vascular
283	GO_Biological_Process_2023__Response To Zinc Ion (GO:0010043)	-0.466161	-2.14796	0.00285307	0.00535265	0.709	14/23	22.45%	CRIP1;GLRA2;MT1F;SLC30A8;HAAO;MT1G;SLC30A3;GLRA1;MT1E;MT1M;MT2A;SLC30A2;ZACN;MT1X	vascular
284	GO_Biological_Process_2023__Sensory Perception Of Sound (GO:0007605)	-0.313929	-2.14699	0	0.00535183	0.709	42/83	26.22%	CRYM;SNAI2;COL4A3;EYA1;USH1C;MYO7A;LHFPL4;LOXHD1;TSPEAR;COL1A1;TIMM10;BIRC5;TFAP2A;KIT;PAX3;MYO3A;ATP2B2;TIMM13;WHRN;PCDH15;LHFPL3;CHRNB2;GSDME;SOD1;NDUFB9;ATP6V0A4;TIMM8B;MYO7B;ROR1;POU3F4;COL11A1;COL2A1;CLIC5;TMC2;CACNA1D;PDZD7;PJVK;CEMIP;DCDC2;TMIE;LRP2;SPTBN4	vascular
285	WikiPathway_2023_Human__TYROBP Causal Network In Microglia WP3945	-0.349255	-2.14689	0.00127226	0.00533264	0.709	32/59	27.16%	CD37;RUNX3;SPP1;IL10RA;ITGAX;SAMSN1;RGS1;C3;BIN2;C1QC;CD4;ADAP2;APBB1IP;GAL3ST4;ITGAM;CYTL1;PLEK;MAF;KCNE3;PYCARD;TYROBP;ITGB2;IL18;NCKAP1L;RBM47;LYL1;NRROS;CXCL16;CD84;IGSF6;LOXL3;RNASE6	vascular
286	KEGG_2021_Human__Oxytocin signaling pathway	-0.274301	-2.14645	0	0.00532826	0.711	62/145	24.53%	KCNJ4;PIK3CG;CACNA2D2;CD38;GUCY1B1;ADCY5;CALM3;CACNB2;NPPA;GUCY1A2;MYL9;KCNJ9;MYLK2;PRKAA2;CALML4;GUCY1A1;PRKCG;CACNG3;CACNG4;CACNA2D3;CALM1;CACNA1S;CAMK2A;ADCY1;CALM2;KCNJ6;CACNG8;KCNJ12;RYR3;CAMK2B;GNAO1;CACNA1F;CACNB1;CAMK4;GNAI1;JUN;CACNG7;CACNA2D4;ADCY8;MYL6;PIK3R5;CAMK1;PIK3R6;PLCB2;CACNG5;FOS;CAMK1G;CCND1;RYR2;CACNG2;KCNJ3;TRPM2;NFATC4;MYLK;CACNA1D;ADCY7;JMJD7-PLA2G4B;HRAS;MYL6B;ACTG1;ITPR…	vascular
287	KEGG_2021_Human__Non-alcoholic fatty liver disease	-0.27746	-2.14574	0	0.00534579	0.713	67/144	28.88%	NDUFA4L2;COX4I2;PIK3CD;NDUFA4;NDUFS5;NDUFC2;PRKAA2;CYC1;MAPK10;UQCRH;NDUFB10;NDUFS7;DDIT3;NDUFB8;COX8A;NDUFB7;NDUFB5;NDUFA1;COX5A;SDHD;COX6B1;COX7C;NDUFB11;NDUFA8;COX6A1;COX5B;UQCR10;COX4I1;CYCS;COX7A2;NDUFS3;IRS1;NDUFA13;UQCRB;COX7B;NDUFB2;IL1B;JUN;UQCRQ;NDUFAB1;NDUFA2;COX6A2;NDUFB9;NDUFB3;FOS;COX6C;NDUFA11;NDUFC2-KCTD14;BAX;UQCR11;NDUFA7;CYP2E1;COX7A1;CEBPA;MLXIP;PIK3R2;UQCRHL;UQCRFS1;IRS2;COX7…	vascular
288	GO_Biological_Process_2023__Detection Of Chemical Stimulus Involved In Sensory Perception Of Bitter Taste (GO:0001580)	0.423436	2.14475	0	0.0382282	0.678	11/19	14.33%	TAS2R5;TAS2R43;TAS2R50;TAS2R3;TAS2R19;TAS2R30;TAS2R10;TAS2R13;TAS2R46;TAS2R20;TAS2R14	vascular
289	KEGG_2021_Human__Amphetamine addiction	-0.342626	-2.1446	0	0.00536318	0.717	34/64	29.05%	FOSB;STX1A;ADCY5;CALM3;DRD1;GRIN1;GRIN3A;GRIA4;CALML4;PRKCG;CALM1;CAMK2A;CALM2;GRIN2C;CAMK2B;CREB3L1;CAMK4;JUN;PDYN;GRIA1;FOS;GRIN2B;GRIA2;GRIN2A;CACNA1D;PPP1R1B;MAOB;SLC18A2;ARC;DDC;TH;GRIN2D;GRIA3;CREB3	vascular
290	GO_Cellular_Component_2023__Golgi Lumen (GO:0005796)	-0.323373	-2.13947	0	0.00555398	0.731	36/76	22.25%	LUM;PCSK6;DCN;CSPG4;MUC15;SOD3;GPC6;GPC5;PRELP;WNT6;GPC2;SDC2;FMOD;WNT7A;OGN;PCSK5;F10;CSPG5;F7;BGN;WNT5A;MUC12;MMP16;NCAN;MMP11;MUCL1;VCAN;GPC1;WNT3;WNT4;PDGFA;SDC1;PODXL2;GPC3;HS3ST1;BCAN	vascular
291	GO_Biological_Process_2023__Mitochondrial Respiratory Chain Complex Assembly (GO:0033108)	-0.309217	-2.13728	0	0.00566397	0.741	63/87	51.09%	NDUFAF3;NDUFS5;COX14;NDUFC2;PET117;NDUFB10;COA3;NDUFS7;NDUFB8;NDUFB7;NDUFAF8;NDUFB5;NDUFA1;NDUFB11;NDUFA8;NDUFS3;NDUFA13;SDHAF1;NDUFB2;DMAC1;NDUFAB1;TMEM186;NDUFA2;NDUFB9;NDUFB3;NDUFA11;UQCC3;COX16;UQCRFS1;NDUFS8;PET100;NDUFA3;NDUFA6;NDUFC1;NDUFAF4;NDUFB1;CHCHD4;SDHAF2;BCS1L;NDUFA5;NDUFB4;SCO2;TMEM223;LYRM2;CHCHD7;COA8;SDHAF3;UQCC2;COX18;OXA1L;COX20;COX17;TMEM126A;DMAC2;SURF1;SLC25A33;TMEM126B;ND…	vascular
292	MSigDB_Hallmark_2020__KRAS Signaling Dn	-0.267308	-2.1369	0	0.00566547	0.742	103/164	41.34%	SNCB;SNN;CLDN16;ARHGDIG;KLK7;KLHDC8A;GPRC5C;WNT16;DLK2;BMPR1B;CPB1;NRIP2;IGFBP2;HSD11B2;UPK3B;SMPX;ITIH3;SOX10;CELSR2;GRID2;KCNQ2;GPR3;SLC30A3;PAX3;ABCG4;ACTC1;KCNMB1;LYPD3;CACNA1F;PTGFR;P2RX6;PDK2;KCNN1;YBX2;NUDT11;ARPP21;MEFV;SLC16A7;IL5;RGS11;EPHA5;FGF22;MAST3;RYR2;CPA2;KRT5;DCC;NOS1;GPR19;MAGIX;MYO15A;ADRA2C;COL2A1;IRS4;PNMT;CKM;CCNA1;LFNG;SLC38A3;THNSL2;TENM2;GAMT;MYOT;EFHD1;FGFR3;OXT;EDAR;C…	vascular
293	MSigDB_Hallmark_2020__TNF-alpha Signaling via NF-kB	0.184375	2.13575	0	0.0398025	0.704	68/197	16.88%	IL6;PTGS2;FOSL1;CXCL1;CXCL2;EDN1;NR4A3;DUSP5;SERPINE1;FOSL2;MAP3K8;KYNU;CXCL3;SOCS3;IER3;PTPRE;IL15RA;SDC4;SIK1;ACKR3;MAFF;TNFAIP8;CD80;TLR2;PTX3;BCL6;CEBPD;SLC16A6;F3;LITAF;CDKN1A;BCL3;ICAM1;NFKBIE;EFNA1;TRAF1;TNFRSF9;GCH1;SLC2A3;ETS2;SPSB1;GADD45B;MYC;RELB;TNFAIP3;LDLR;SAT1;ABCA1;B4GALT1;ZFP36;NAMPT;STAT5A;PLAUR;CFLAR;TIPARP;RNF19B;TGIF1;B4GALT5;CSF1;NFIL3;SERPINB8;BIRC3;MCL1;JAG1;CCNL1;PER1;IL…	vascular
294	WikiPathway_2023_Human__Complement And Coagulation Cascades WP558	0.262634	2.13314	0	0.039719	0.708	20/52	14.09%	VWF;MASP1;CFB;CFI;C7;THBD;SERPINE1;C1R;SERPINA5;SERPINF2;F5;F3;F2R;SERPINC1;PLAT;C2;F8;CD55;PLAUR;CFH	vascular
295	GO_Cellular_Component_2023__Sarcolemma (GO:0042383)	-0.350453	-2.12723	0	0.00617045	0.773	33/52	34.38%	DES;ATP1B1;SLC8A2;SLC2A4;DMD;FXYD1;RYR3;ANK3;SGCG;ANK2;CIB1;SYNM;AQP1;RYR2;SLC8A1;POPDC3;SLC8A3;NOS1;CCDC78;SGCD;SSPN;TRIM72;MLIP;SNTA1;SGCZ;FLNC;SGCB;CACNG1;RYR1;PGM5;ALOX12;AQP4;SYNC	vascular
296	GO_Biological_Process_2023__Homophilic Cell Adhesion Via Plasma Membrane Adhesion Molecules (GO:0007156)	-0.346025	-2.12589	0	0.00622674	0.774	32/56	27.84%	L1CAM;CNTN4;FAT2;CNTN2;PTK7;IGSF21;AMIGO2;CELSR2;KIRREL3;NECTIN1;PLXNB3;ROBO1;CNTN6;DSCAML1;DSG2;CADM4;CDH1;EMB;TENM3;CDH13;IGSF11;HMCN1;CADM3;PCDHB6;CD84;CDH17;DSCAM;ROBO2;CADM1;MYOT;TRO;PALLD	vascular
297	GO_Cellular_Component_2023__Synaptic Membrane (GO:0097060)	-0.429628	-2.12302	0.0013245	0.00639944	0.779	18/31	24.66%	SHISA7;LRRTM1;SHISA6;RIMS4;GRIN1;ATP2B2;NLGN1;LRRTM2;GRIA1;GRIN2B;FLRT3;GRIN2A;SLITRK3;GPER1;LRP4;DLG4;SHISA8;SHISA9	vascular
298	GO_Biological_Process_2023__Regulation Of Nervous System Process (GO:0031644)	-0.509635	-2.12229	0	0.00643317	0.781	13/18	28.89%	TMEM108;NPTX2;NPTXR;SLC8A2;NPTX1;BEGAIN;HTR2C;DLGAP3;CACNG5;SLC8A3;CHRNA7;DLGAP2;DLGAP1	vascular
299	KEGG_2021_Human__Thermogenesis	-0.255124	-2.12171	0	0.00644907	0.785	83/210	24.57%	NDUFA4L2;COX4I2;ATP5MC1;ATP5PO;ADCY5;PRKG1;NDUFA4;ACTL6B;ATP5F1D;NDUFAF3;NPPA;NDUFS5;ATP5MC3;COX14;NDUFC2;PRKAA2;CYC1;UQCRH;NDUFB10;COA3;NDUFS7;NDUFB8;COX8A;NDUFB7;NDUFAF8;NDUFB5;ADCY1;NDUFA1;COX5A;SDHD;COX6B1;DPF1;COX7C;NDUFB11;NDUFA8;COX6A1;COX5B;UQCR10;COX4I1;COX7A2;NDUFS3;NDUFA13;CREB3L1;COA6;UQCRB;COX7B;NDUFB2;ATP5MG;BMP8A;CNR1;UQCRQ;NDUFAB1;ADCY8;NDUFA2;ATP5PF;ATP5MF;COX6A2;SMARCD3;NDUFB9;N…	vascular
300	WikiPathway_2023_Human__Nephrogenesis WP5052	-0.54364	-2.12145	0	0.00643684	0.786	12/15	28.27%	SIX2;MEIS1;FOXD1;FGF20;ALDH1A2;OSR1;PAX2;WNT4;GREB1L;NOTCH2;RSPO3;BMP7	vascular
301	GO_Biological_Process_2023__Acetylcholine Receptor Signaling Pathway (GO:0095500)	-0.512574	-2.12003	0	0.00650137	0.792	11/18	21.40%	LY6H;LYPD1;CDK5R1;CHRM4;CHRM1;RGS8;RGS10;CHRM2;CHRNB2;CHRNA7;CHRM5	vascular
302	GO_Biological_Process_2023__Glutamate Receptor Signaling Pathway (GO:0007215)	-0.406455	-2.1157	0.00129534	0.00673194	0.807	24/35	35.75%	GRM3;GRM8;CDK5R1;GRIN1;GRIN3A;GRIA4;GRID2;KCNB1;GRIN2C;GRM4;GRIN2B;GRIK4;GRIA2;GRIN2A;GRIK3;GRM5;GRIK1;GRM1;GRIN2D;HOMER3;GRIA3;GRIK2;GRM7;GRM2	vascular
303	GO_Biological_Process_2023__Detection Of Chemical Stimulus Involved In Sensory Perception Of Smell (GO:0050911)	-0.446939	-2.11398	0.00136426	0.0068155	0.813	24/26	48.32%	OR2A42;OR2L5;OR2L2;OR2G6;OR2L3;SLC24A4;OR2F1;OR6A2;OR2B11;OR10H5;OR2A14;OR2A12;OR5V1;OR2AG2;OR2A25;OR2M4;OR2M3;OR10AC1;OR2M2;OR2A5;OR2L13;OR2H2;OR2A1;OR10G3	vascular
304	GO_Biological_Process_2023__Potassium Ion Import Across Plasma Membrane (GO:1990573)	-0.385468	-2.11372	0	0.00680545	0.815	21/40	22.03%	KCNJ4;ABCC9;ATP1A3;KCNJ11;KCNJ8;ATP1B1;ATP1A2;KCNJ9;ATP1A4;SLC12A5;ATP1B2;KCNJ6;KCNK9;KCNH2;KCNJ12;HCN2;SLC12A7;FXYD2;KCNJ3;SLC12A1;KCNJ16	vascular
305	GO_Biological_Process_2023__Regulation Of Potassium Ion Transport (GO:0043266)	-0.424827	-2.11321	0	0.00679548	0.815	20/30	30.89%	CASQ2;DRD1;ADRA2A;KCNAB1;KCNIP1;KCNIP3;KCNA5;KCNH2;ANK3;CD63;ANK2;DPP10;NOS1;DPP6;CACNA1D;VIP;KCNAB2;KCNAB3;GNB2;KCNIP4	vascular
306	GO_Biological_Process_2023__Positive Regulation Of Neuron Projection Development (GO:0010976)	-0.301556	-2.11321	0.00116414	0.00676851	0.815	49/90	33.90%	STMN2;MUSK;NTRK3;PTN;GPC2;PTK7;NTRK1;PACSIN1;NDRG4;ATP1B2;PLPPR5;PLXNB3;NLGN1;WNT5A;CAMK2B;APOE;DPYSL3;ZNF804A;CAMK1;CUX2;SERPINI1;NDNF;ROR1;TENM3;SCN1B;FUT9;NTRK2;PTK6;COBL;RIT2;TWF2;DDR2;ALK;LRRC7;MDK;TNN;PLK5;DDR1;BDNF;VLDLR;RELN;BMP7;CX3CL1;ROR2;SCARF1;S100A9;PLA2G3;LTK;MAGI2	vascular
307	GO_Molecular_Function_2023__Postsynaptic Neurotransmitter Receptor Activity (GO:0098960)	-0.505042	-2.11293	0	0.00675197	0.815	16/18	39.33%	DRD1;CHRNA4;CHRNB2;GRIA1;CHRNA2;DRD5;CHRNB4;CHRNA7;DRD4;GRM5;GRM1;CHRNB1;CHRNA5;CHRFAM7A;CHRNA3;CHRNA1	vascular
308	MSigDB_Hallmark_2020__KRAS Signaling Up	-0.256685	-2.11216	0	0.00678976	0.818	79/191	23.59%	PCSK1N;PLAU;PCP4;CD37;RBP4;TMEM158;G0S2;SNAP25;ANO1;IKZF1;ITGBL1;GFPT2;SPP1;USH1C;IL10RA;SCG5;BMP2;DOCK2;ALDH1A3;FGF9;HSD11B1;GYPC;PRRX1;IL33;GPNMB;IRF8;IGF2;GUCY1A1;LIF;TSPAN7;WNT7A;CXCL10;F13A1;LAPTM5;CBX8;ALDH1A2;APOD;SNAP91;ACE;ADAM8;KLF4;ETV1;KIF5C;INHBA;TMEM176B;MMP11;MYCN;BTC;IL1B;EPB41L3;NR1H4;C3AR1;CMKLR1;TSPAN1;ITGB2;PEG3;SCG3;SPON1;JUP;TFPI;MAP4K1;SCN1B;TMEM176A;PRKG2;CIDEA;NAP1L2;GNG1…	vascular
309	GO_Molecular_Function_2023__Calcium Channel Regulator Activity (GO:0005246)	-0.405979	-2.11114	0	0.0068475	0.819	24/34	36.58%	RRAD;PRKG1;NPY;REM1;GEM;FKBP1B;PACSIN3;CACNG4;CALM1;CALM2;CACNG8;NRXN2;PHPT1;CACNG7;SLC30A1;ITPR1;TNNI3;CACNG1;NRXN1;NPY2R;SRI;SGK1;STIMATE;FKBP1A	vascular
310	GO_Biological_Process_2023__Histone H4 Acetylation (GO:0043967)	0.291907	2.11114	0	0.0444328	0.744	36/38	61.98%	RUVBL1;KANSL2;RUVBL2;MSL3;JADE2;TRRAP;KAT7;EPC1;KANSL1;PHF20;MBTD1;EPC2;OGT;EP400;MSL2;KANSL3;MSL1;JADE3;ACTL6A;ING3;NAA40;WDR5;ING5;BRD8;ING4;YEATS4;MRGBP;KAT8;HCFC1;JADE1;MORF4L1;MEAF6;KAT5;VPS72;MCRS1;MORF4L2	vascular
311	GO_Molecular_Function_2023__Nucleosome Binding (GO:0031491)	0.265308	2.10871	0	0.0440909	0.749	51/57	58.40%	H1-5;HMGA2;CGAS;H1-3;CHD1L;RCC1;RNF169;HDAC1;EED;SMARCC1;RNF4;RNF168;PWWP3A;SMARCE1;HIRA;ARID1B;SMARCA4;GATAD2B;CABIN1;MLLT10;MBD2;ARID1A;GLYR1;HNRNPC;MACROH2A1;RBBP4;SUPT6H;NAP1L4;HP1BP3;H3-3A;ACTL6A;HDAC2;SUPT16H;MLLT6;ACTR6;SMARCC2;SMARCB1;SAP30L;CHD4;NOC2L;SMARCD2;DNTTIP1;H1-2;L3MBTL1;SSRP1;PARP2;MTA2;H1-4;H3-5;PARP1;MBD3	vascular
312	GO_Biological_Process_2023__Regulation Of Cardiac Muscle Cell Action Potential (GO:0098901)	-0.432788	-2.1078	0	0.00701909	0.829	15/28	18.40%	TBX18;CALM3;CTNNA3;HCN3;GJA5;FGF13;CXADR;CALM1;PKP2;ANK2;DSG2;HCN1;HCN2;RYR2;JUP	vascular
313	KEGG_2021_Human__Synaptic vesicle cycle	-0.316821	-2.10778	0.00119617	0.00699513	0.829	39/71	34.24%	RAB3A;STX1B;SLC6A7;SLC6A12;ATP6V1G2;SNAP25;STX1A;SLC6A13;SLC6A1;SLC1A6;SLC1A3;SLC17A8;ATP6V1F;CPLX2;DNM1;SLC17A6;VAMP2;ATP6V0B;SLC17A7;SYT1;SLC6A11;UNC13C;ATP6V0A4;SLC32A1;SLC6A9;ATP6V0E2;CACNA1B;ATP6V0C;SLC18A2;RIMS1;AP2S1;UNC13A;AP2M1;CLTB;CACNA1A;ATP6V0D1;SLC1A2;SLC6A4;ATP6V1G1	vascular
314	GO_Biological_Process_2023__Regulation Of Actin Filament-Based Process (GO:0032970)	-0.325714	-2.10742	0.00118343	0.0070047	0.831	46/68	43.64%	RAC3;CORO1A;SH3BP1;FZD10;PDGFRB;DAAM2;DYNLL1;EFNA5;LRP1;CORO2B;ARHGAP44;PAK1;BST2;BST1;CELSR1;GPM6B;EPHA5;PAK3;NRG1;PDGFA;IQGAP2;FSCN1;ARHGEF5;HRAS;PEAK3;TWF2;GRHL3;TESK1;RHOA;CNN2;SLC4A2;ESAM;F11R;MLST8;DMTN;PRKCD;SMIM22;EPHA3;BAIAP2;RHOG;RAC1;HCK;EZR;DAPK3;ABRACL;CAPN10	vascular
315	GO_Biological_Process_2023__snRNA Metabolic Process (GO:0016073)	0.389906	2.10728	0.00338983	0.0436595	0.751	19/21	45.41%	MEPCE;INTS13;INTS3;INTS2;INTS7;INTS6;SNAPC3;INTS9;INTS10;RPAP2;INTS14;INTS8;ZCCHC8;INTS4;MTREX;USPL1;INTS12;INTS11;RBM7	vascular
316	GO_Biological_Process_2023__Regulation Of Regulated Secretory Pathway (GO:1903305)	-0.407387	-2.10414	0.002574	0.00725677	0.842	20/34	26.64%	RAB3A;SYT4;SYT13;RIMS4;SYT5;SYT15;SYN1;TRPV6;SYT1;RPH3A;SYT9;SEPTIN5;SYT10;RIMS3;SYT6;SYT17;SYT3;SYT2;SYT7;RIMS1	vascular
317	WikiPathway_2023_Human__Regulatory Circuits Of The STAT3 Signaling Pathway WP4538	0.231262	2.10352	0.00564972	0.044138	0.764	28/75	17.06%	OSMR;F2RL3;SOCS3;IL15RA;IL20RB;DEPTOR;IL27RA;IFNGR1;IFNLR1;JAK3;CSF2RB;IL2RG;MAPK13;IL3RA;MAPK11;F2R;STAT3;IL6R;CSF2RA;GHR;CNTFR;IFNAR2;IL2RA;IL10RB;EGFR;LIFR;JAK2;IFNAR1	vascular
318	GO_Molecular_Function_2023__G Protein-Coupled Serotonin Receptor Activity (GO:0004993)	-0.480652	-2.10293	0.00141643	0.00728359	0.845	15/21	26.85%	HTR1A;HTR1F;HTR2A;CHRM4;HRH3;HRH2;CHRM2;HTR2C;HTR5A;HTR7;HTR2B;DRD4;CHRM5;HTR1E;CHRM3	vascular
319	GO_Molecular_Function_2023__G Protein-Coupled Amine Receptor Activity (GO:0008227)	-0.480652	-2.10293	0.00141643	0.00728359	0.845	15/21	26.85%	HTR1A;HTR1F;HTR2A;CHRM4;HRH3;HRH2;CHRM2;HTR2C;HTR5A;HTR7;HTR2B;DRD4;CHRM5;HTR1E;CHRM3	vascular
320	GO_Biological_Process_2023__Positive Regulation Of Phospholipase C Activity (GO:0010863)	-0.394062	-2.10049	0	0.00742988	0.853	22/35	28.20%	AVPR1A;HTR2A;P2RY12;EDNRA;PDGFRB;CD86;PDGFRA;S1PR4;ARHGAP6;LPAR1;KIT;ANG;ESR1;NMUR1;C5AR1;PLCB2;PHB2;HTR2B;HRAS;ADRA1D;PTH;ITK	vascular
321	GO_Molecular_Function_2023__Ligand-Gated Monoatomic Cation Channel Activity (GO:0099094)	-0.324303	-2.09934	0	0.00749325	0.856	41/67	32.73%	KCNJ4;KCNK1;KCNJ8;P2RX5;P2RX3;KCNJ9;KCNJ6;CHRNA4;KCNH2;KCNJ12;P2RX1;P2RX6;CHRNB2;CHRNB3;KCNN1;TRPM5;CHRNA2;SCNN1D;KCNH6;GRIK4;KCNH7;KCNJ3;CHRNB4;GRIK3;CHRNA7;ASIC4;KCNJ16;GRIK1;CHRNB1;CHRNA9;P2RX7;CHRNA5;HTR3C;KCNJ13;GRIK2;ASIC2;CCDC51;KCNJ15;KCNJ10;CHRFAM7A;GRIK5	vascular
322	WikiPathway_2023_Human__Mitochondrial Complex I Assembly Model OXPHOS System WP4324	-0.352567	-2.09926	0	0.00746812	0.856	29/50	35.30%	NDUFAF3;NDUFS5;NDUFC2;NDUFB10;NDUFB8;NDUFB7;NDUFB5;NDUFA1;NDUFB11;NDUFA8;NDUFS3;NDUFA13;NDUFB2;DMAC1;NDUFAB1;TMEM186;NDUFA2;NDUFB9;NDUFB3;NDUFA7;NDUFS6;NDUFA3;NDUFA6;NDUFC1;NDUFAF4;NDUFB1;NDUFA5;NDUFB4;NDUFV1	vascular
323	GO_Molecular_Function_2023__Proton Transmembrane Transporter Activity (GO:0015078)	-0.37567	-2.09851	0	0.00748216	0.859	29/40	42.18%	MFSD3;NOX5;SLC4A11;COX4I2;ATP6V1F;UQCRH;COX8A;COX5A;COX6B1;COX7C;COX5B;UQCR10;COX4I1;SLC46A1;UQCRB;COX7B;SLC32A1;COX7A1;UQCRHL;SLC18A2;COX7A2L;UCP3;OTOP3;UCP2;TMEM175;SLC11A1;CYB5A;ATP6V1B2;UQCRC1	vascular
324	GO_Cellular_Component_2023__Axonal Growth Cone (GO:0044295)	-0.533338	-2.09554	0.00148368	0.00765785	0.863	10/15	22.75%	L1CAM;OLFM1;GPM6A;RTN4R;SHTN1;KIF5C;HSP90AB1;FLRT3;DCC;COBL	vascular
325	GO_Biological_Process_2023__Chromatin Remodeling (GO:0006338)	0.172726	2.09501	0	0.0461165	0.783	179/220	55.51%	DEPDC1B;TFAP2C;PRDM16;BRDT;SNAI1;MECOM;PADI4;IFI16;LOXL2;CHD1L;MYC;SLFN11;BAZ1A;RUVBL1;ASF1A;KDM4D;PER1;SMARCA2;MTHFR;KDM2B;HDAC4;SETDB2;ZNF274;TTI1;GATAD2A;SETD4;RUVBL2;KDM4B;PHF10;HDAC1;PER2;SMARCC1;ZNF335;BCOR;ZBTB1;KDM5C;CHD7;PCGF6;USP3;KDM6A;ACTR5;IWS1;RNF168;TADA2A;CHD2;SETDB1;ARID2;USP15;SETD7;PCID2;MORC2;PRIMPOL;UBR5;RB1;SMARCE1;BAZ2B;KDM4C;INO80;TDG;SUDS3;HDGFL3;HIRA;SMARCAD1;ARID1B;SMAR…	vascular
326	GO_Biological_Process_2023__Detection Of Chemical Stimulus Involved In Sensory Perception Of Taste (GO:0050912)	0.385833	2.09081	0.00359712	0.0466112	0.788	12/22	14.33%	TAS2R5;TAS2R43;PKD1L3;TAS2R50;TAS2R3;TAS2R19;TAS2R30;TAS2R10;TAS2R13;TAS2R46;TAS2R20;TAS2R14	vascular
327	KEGG_2021_Human__Complement and coagulation cascades	0.239765	2.09052	0	0.0459304	0.788	27/68	15.97%	VWF;MASP1;CFB;CFI;C7;F2RL3;THBD;SERPINE1;C1R;SERPINA5;SERPINF2;F5;CR1L;F3;F11;F2R;SERPINC1;VSIG4;PLAT;C2;F8;CD55;CD59;PLAUR;CFH;C5;C1S	vascular
328	GO_Biological_Process_2023__Regulation Of Monoatomic Cation Transmembrane Transport (GO:1904062)	-0.38833	-2.08868	0.00128041	0.00808041	0.876	26/38	36.49%	HRC;GRIN1;KCNAB1;HCN3;KCNIP1;KCNIP3;KCNH2;GRIN2C;CD63;HCN1;HCN2;GRIN2B;DPP10;GRIN2A;DPP6;CACNA1D;KCNAB2;SNTA1;HCN4;GRIN2D;KCNAB3;GNB2;KCNIP4;RANGRF;FGF12;WNK3	vascular
329	GO_Biological_Process_2023__Positive Regulation Of Leukocyte Mediated Cytotoxicity (GO:0001912)	-0.366412	-2.08688	0	0.00817549	0.877	28/43	33.22%	KLRC2;RASGRP1;HLA-G;RAET1G;NOS2;CRTAM;KLRK1;ITGAM;HLA-C;TYROBP;ULBP2;IL12RB1;CD1D;HLA-B;HLA-A;KLRC3;ULBP3;HLA-DRA;CADM1;SPI1;HLA-E;LAMP1;SLAMF6;IL23R;HLA-F;UXT;FADD;IL23A	vascular
330	KEGG_2021_Human__Ovarian steroidogenesis	0.293361	2.08582	0.00840336	0.0469246	0.804	16/39	13.64%	PTGS2;LHCGR;PLA2G4A;ACOT2;ALOX5;ACOT1;ADCY2;ADCY4;CYP11A1;IGF1R;CYP19A1;BMP6;PLA2G4B;LDLR;AKR1C3;SCARB1	vascular
331	GO_Biological_Process_2023__Muscle Organ Development (GO:0007517)	-0.346856	-2.08483	0.005	0.00828266	0.88	25/52	22.39%	IGF1;DES;ITGA11;ITGA7;COL6A3;TAGLN;COPRS;CXCL10;DMD;CACNA1H;SGCA;LAMA2;SGCG;VAMP5;SGCE;SPEG;SOX6;ZBTB42;KY;SGCD;EGR3;TRIM72;HBEGF;EVC;CTF1	vascular
332	WikiPathway_2023_Human__Genes Associated With The Development Of Rheumatoid Arthritis WP5033	0.425119	2.08123	0.00649351	0.0477502	0.808	10/17	18.98%	CTLA4;HLA-DRB1;PADI4;CIITA;SLC22A4;TRAF1;ITGAV;IL2RA;CD40;IL6ST	vascular
333	GO_Biological_Process_2023__Positive Regulation Of Cell Junction Assembly (GO:1901890)	-0.333839	-2.0805	0.00248447	0.00860259	0.887	32/58	30.99%	THY1;SYNDIG1;COL16A1;SLITRK2;SLITRK5;SLITRK1;SFRP1;IL1RAPL1;WNT7A;LRRC4B;GRID2;EPHB3;SLITRK4;NLGN1;S100A10;CUX2;PTPRD;SLITRK3;NELL1;NRG1;EPHB1;CLSTN2;NLGN3;CLDN5;EPHB2;BDNF;VEGFA;AGT;SLITRK6;CNTNAP2;NRXN1;IRX3	vascular
334	GO_Biological_Process_2023__Regulation Of Cell Adhesion Mediated By Integrin (GO:0033628)	-0.411233	-2.07988	0	0.00863436	0.887	18/32	23.96%	RAC3;PLAU;PIK3CG;SNAI2;P2RY12;SYK;DPP4;FOXC2;LIF;TESC;CYP1B1;CIB1;SFRP2;JAM3;NCKAP1L;NRG1;NEXMIF;FERMT3	vascular
335	GO_Biological_Process_2023__Positive Regulation Of Bone Mineralization (GO:0030501)	-0.383977	-2.07979	0.00132275	0.00861211	0.887	22/37	29.07%	LTF;PTN;BMP2;BMPR1B;ISG15;FZD9;BMPR1A;TFAP2A;BMP4;GPM6B;SLC8A1;WNT4;NELL1;FBN2;PKDCC;TMEM119;PTH;P2RX7;BMP7;SLC20A2;KL;ATRAID	vascular
336	WikiPathway_2023_Human__T Cell Modulation In Pancreatic Cancer WP5078	0.284715	2.0777	0	0.0479636	0.819	20/43	17.19%	IL6;TNFRSF4;CTLA4;ARG1;CD80;VEGFD;VEGFC;PVR;TNFRSF9;PDCD1LG2;IDO1;ICOS;LGALS9;LGALS3;CD226;ENTPD1;PDCD1;CD40;FAS;TGFB1	vascular
337	GO_Biological_Process_2023__Positive Regulation Of Neural Precursor Cell Proliferation (GO:2000179)	-0.42306	-2.07727	0	0.00876655	0.895	18/28	30.06%	CX3CR1;HAPLN1;FZD9;HAPLN2;INSM1;DLL4;NCAN;VCAN;SMARCD3;PROX1;BCAN;DISP3;MDK;LRP2;VEGFA;NES;CX3CL1;HAPLN3	vascular
338	GO_Biological_Process_2023__Adenylate Cyclase-Activating G Protein-Coupled Receptor Signaling Pathway (GO:0007189)	-0.29945	-2.07623	0	0.00879423	0.895	54/91	34.55%	PTH1R;GNG2;ADORA2B;ADGRD1;ADCY5;DRD1;ADRA2A;PTGER1;RAMP2;TBXA2R;ADGRE2;GPR65;MC4R;ADRA2B;CXCL10;ADCY1;GPR26;GPR3;ADGRB2;RAMP1;ADORA2A;ADRA1B;ADGRB3;CXCL11;GHRHR;PTGER4;PTGFR;ADCY8;PTGER3;DRD5;GIPR;ADM;PTHLH;GPER1;ADRA2C;ADGRG5;ADGRF1;ADCY7;ADCYAP1;VIP;TSHR;ADGRB1;ADRA1D;PTH;ADGRE5;GLP1R;ADGRF3;ADRB1;UTS2;ADGRG2;CALCR;ADGRE1;ADGRL3;ADGRG7	vascular
339	KEGG_2021_Human__NF-kappa B signaling pathway	0.211553	2.07223	0	0.0487707	0.83	40/99	20.91%	PTGS2;CXCL1;CXCL2;LY96;CXCL8;TNFRSF11A;CXCL3;EDARADD;TICAM2;VCAM1;TNFSF14;PLCG2;BTK;ICAM1;TRAF1;LTA;TNFSF13B;IL1R1;GADD45B;RELB;TNFAIP3;TRADD;CSNK2A3;EDA2R;CFLAR;BIRC3;IRAK4;CD40;CYLD;IKBKB;PIDD1;MALT1;TNFRSF1A;TRAF2;TICAM1;TRIM25;MAP3K14;NFKB2;PLCG1;TAB1	vascular
340	GO_Molecular_Function_2023__Excitatory Extracellular Ligand-Gated Monoatomic Ion Channel Activity (GO:0005231)	-0.449699	-2.06723	0.00409836	0.00951956	0.917	19/23	39.79%	P2RX5;P2RX3;CHRNA4;GLRB;P2RX1;P2RX6;CHRNB2;CHRNB3;CHRNA2;CHRNB4;CHRNA7;CHRNB1;CHRNA9;P2RX7;CHRNA5;GRIK2;CHRNA3;CHRNA1;TRPV1	vascular
341	GO_Molecular_Function_2023__DNA Polymerase Activity (GO:0034061)	0.406174	2.06568	0	0.0490623	0.85	14/20	29.16%	POLQ;POLN;POLD1;POLE;POLE2;POLM;POLL;POLB;REV3L;POLA1;POLD3;PRIMPOL;TENT4A;POLI	vascular
342	GO_Molecular_Function_2023__DNA-directed DNA Polymerase Activity (GO:0003887)	0.406174	2.06568	0	0.0490623	0.85	14/20	29.16%	POLQ;POLN;POLD1;POLE;POLE2;POLM;POLL;POLB;REV3L;POLA1;POLD3;PRIMPOL;TENT4A;POLI	vascular
343	GO_Biological_Process_2023__Monoatomic Anion Transmembrane Transport (GO:0098656)	-0.344922	-2.06379	0.00252525	0.00980311	0.923	25/53	20.21%	ANO3;GABRA1;GABRA5;GLRA2;SLC6A1;SLC1A3;GABRE;SLC4A8;GABRG2;ANO4;SLC12A5;GLRA1;GABRA4;SLC26A9;GLRB;CLCN1;CFTR;GABRB2;GLRA3;SLC12A7;GABRA6;SLC5A6;GABRG3;SLC5A1;SLC12A1	vascular
344	GO_Molecular_Function_2023__Amino Acid:Sodium Symporter Activity (GO:0005283)	-0.515791	-2.06213	0.00425532	0.00993859	0.925	12/16	27.20%	SLC6A7;SLC6A12;SLC6A13;SLC6A1;SLC1A6;SLC1A3;SLC6A15;SLC38A1;SLC6A11;SLC38A3;SLC6A6;SLC38A4	vascular
345	KEGG_2021_Human__Aldosterone synthesis and secretion	-0.292098	-2.05966	0	0.0101102	0.931	33/90	16.45%	ATP1A3;KCNK3;ATP1B1;ADCY5;CALM3;ATP1A2;CACNA1G;NPPA;ATP2B3;AGTR1;CALML4;ATP1A4;PRKCG;CALM1;CACNA1S;CAMK2A;ADCY1;ATP1B2;CALM2;CACNA1H;KCNK9;ATP2B2;CAMK2B;NR4A1;CREB3L1;CACNA1F;CAMK4;ADCY8;POMC;CACNA1I;CAMK1;PLCB2;CAMK1G	vascular
346	GO_Biological_Process_2023__Regulation Of Release Of Sequestered Calcium Ion Into Cytosol By Sarcoplasmic Reticulum (GO:0010880)	-0.45085	-2.05836	0.00142045	0.0102066	0.933	12/22	17.29%	CASQ1;CALM3;CASQ2;ATP1A2;HRC;FKBP1B;DMD;CALM1;CALM2;ANK2;RYR2;SLC8A1	vascular
347	KEGG_2021_Human__Cocaine addiction	-0.359719	-2.0583	0.0012285	0.0101702	0.933	26/47	29.05%	GRM3;FOSB;CDK5R1;ADCY5;DRD1;GRIN1;CDK5;GRIN3A;GRIN2C;CREB3L1;GNAI1;JUN;PDYN;GRIN2B;GRIA2;GRIN2A;RGS9;PPP1R1B;MAOB;DLG4;SLC18A2;DDC;TH;BDNF;GRIN2D;CREB3	vascular
348	GO_Biological_Process_2023__ATP Biosynthetic Process (GO:0006754)	-0.432537	-2.05817	0.00145349	0.0101585	0.934	14/24	23.52%	ATP5MC1;ATP5PO;ATP5F1D;ATP5MC3;ATP5MJ;ATP5MG;ATP5PF;ATP5MF;ATP5MK;ATP5PD;ATP5ME;ATP5F1E;ATP5F1A;ATP5F1B	vascular
349	GO_Molecular_Function_2023__GABA Receptor Activity (GO:0016917)	-0.470196	-2.0567	0	0.0102354	0.937	18/21	39.95%	GABRD;GABRA1;GABRA5;GABRE;GABRG2;GABBR2;GABRA4;GABRB2;GABRQ;GABRA6;GABRG3;GABRB3;GABRB1;GABRG1;GPR156;GABRA2;GABRP;GABRA3	vascular
350	GO_Biological_Process_2023__Inorganic Anion Transmembrane Transport (GO:0098661)	-0.32908	-2.05643	0	0.0102266	0.937	32/62	26.11%	ANO3;GABRA1;GABRA5;GLRA2;SLC6A1;SLC1A3;GABRE;SLC4A8;GABRG2;ANO4;SLC12A5;SLC37A2;GLRA1;GABRA4;SLC26A9;GLRB;CLCN1;CFTR;GABRB2;GLRA3;SLC12A7;GABRA6;SLC5A6;GABRG3;SLC5A1;SLC12A1;SLC25A10;GABRB3;SLC37A4;GABRB1;GABRG1;SLC25A11	vascular
351	GO_Biological_Process_2023__Positive Regulation Of Cell Adhesion Mediated By Integrin (GO:0033630)	-0.512673	-2.05588	0.00142857	0.0102451	0.939	10/16	17.63%	RAC3;P2RY12;SYK;FOXC2;CCL5;LIF;SKAP1;CIB1;SFRP2;NCKAP1L	vascular
352	KEGG_2021_Human__Hypertrophic cardiomyopathy	-0.297002	-2.05586	0	0.0102152	0.939	47/86	30.60%	IGF1;DES;ITGA11;ITGA7;CACNA2D2;CACNB2;PRKAA2;MYL3;SLC8A2;ITGA4;CACNG3;CACNG4;DMD;CACNA2D3;CACNA1S;SGCA;CACNG8;LAMA2;ACTC1;ACE;SGCG;CACNA1F;CACNB1;LAMA1;CACNG7;CACNA2D4;ITGB8;CACNG5;RYR2;SLC8A1;SLC8A3;CACNG2;SGCD;ATP2A3;TPM2;CACNA1D;TTN;ACTG1;ACTB;TNNT2;AGT;ITGA10;TNNI3;SGCB;CACNG1;TGFB3;EMD	vascular
353	GO_Biological_Process_2023__Regulation Of NMDA Receptor Activity (GO:2000310)	-0.515254	-2.05504	0.00438596	0.0102367	0.941	13/16	37.64%	CRH;CRHBP;MAPK8IP2;CCL2;DAPK1;NLGN1;SLC6A9;DLG4;EPHB2;OPRM1;RELN;CCR2;IFNG	vascular
354	MSigDB_Hallmark_2020__Spermatogenesis	-0.274572	-2.05357	0	0.0103659	0.942	55/113	32.27%	PCSK1N;GRM8;CNIH2;NPY5R;CLGN;DDX25;SCG5;CHRM4;GAD1;HSPA2;PAPOLB;GSG1;NAA11;PEBP1;ACRBP;OAZ3;NEFH;SNAP91;ACE;CDK1;CAMK4;HTR5A;CFTR;IL13RA2;YBX2;POMC;CCNB2;DDX4;JAM3;SCG3;DCC;NOS1;TKTL1;RPL39L;CLVS1;IL12RB2;MAP7;ZPBP;CCNA1;SEPTIN4;ADCYAP1;ARL4A;NEK2;GFI1;ART3;CDKN3;TTK;LDHC;HBZ;TNNI3;TALDO1;BUB1;MEP1B;GSTM3;AURKA	vascular
355	WikiPathway_2023_Human__Phosphodiesterases In Neuronal Function WP4222	-0.343866	-2.047	0.00126103	0.0109515	0.947	26/53	22.16%	PDE3A;GUCY1B1;ADCY5;PRKG1;PDE8B;DRD1;GRIN1;GUCY1A2;PDE7B;GUCY1A1;PDE1A;CAMK2A;ADCY1;PDE1C;ADORA2A;PDE5A;GRIN2C;ADCY8;GRIA1;GRIN2B;GRIN2A;NOS1;PDE6C;CHRNA7;ADCY7;PPP1R1B	vascular
356	KEGG_2021_Human__Proximal tubule bicarbonate reclamation	-0.458165	-2.04671	0	0.0109314	0.947	13/22	22.09%	ATP1A3;ATP1B1;CA4;ATP1A2;ATP1A4;ATP1B2;AQP1;FXYD2;MDH1;GLS2;SLC25A10;CA2;SLC38A3	vascular
357	GO_Biological_Process_2023__Regulation Of Cardiac Muscle Contraction By Calcium Ion Signaling (GO:0010882)	-0.458733	-2.04486	0.00141044	0.0110807	0.95	11/20	17.29%	ATP1B1;CALM3;CASQ2;ATP1A2;HRC;FKBP1B;DMD;CALM1;CALM2;RYR2;SLC8A1	vascular
358	GO_Biological_Process_2023__RNA Processing (GO:0006396)	0.169744	2.043	0	0.0554742	0.89	147/180	55.97%	WT1;DDX47;PPARGC1A;YJU2;ADARB1;RBPMS;MBNL1;RBMS2;ZMAT5;DDX39B;GEMIN2;BICD1;U2AF1;RBMS1;RBM4;SRPK1;PABPN1;FASTKD1;NOL3;AKAP8L;SNRNP48;YJU2B;XRN2;PRPF3;DHX16;DUSP11;EXOSC10;SNRNP40;DHX8;PABPC4;USP39;SF3B3;TENT4A;CSTF3;NRDE2;RBM6;SRSF4;ZCCHC8;SETX;DHX15;RNGTT;TUT7;NCBP1;SRPK2;RBM5;RSRC1;FBXO11;WBP4;RNPC3;CDK12;THOC1;PRPF18;LUC7L3;DIS3;TUT4;PRPF4B;SCAF11;CPSF6;RBM39;DDX17;HNRNPC;HNRNPU;SF3B1;PPIG;FUS…	vascular
359	WikiPathway_2023_Human__DNA Repair Pathways Full Network WP4946	0.202356	2.04299	0	0.0546817	0.89	110/120	67.74%	NEIL3;FANCI;RFC3;BRCA2;POLD4;POLD1;RFC4;RAD51;GTF2H4;FANCG;EXO1;POLE;BRIP1;FANCE;PALB2;POLE2;GTF2H2C;POLM;DDB2;POLL;RFC2;FAAP100;FANCL;POLB;XRCC4;ERCC5;PNKP;PMS2;RAD52;REV3L;TERF2;ATR;CDK7;CCNH;FAN1;POLD3;MGMT;TDG;DCLRE1C;CUL4A;ATM;POLI;WRN;MNAT1;XPC;FANCC;MLH1;MRE11;MSH3;RAP1A;GTF2H1;REV1;POLK;XRCC5;PRKDC;WDR48;RAD23B;ERCC8;RFC1;DDB1;ERCC4;RPA1;MBD4;POLH;NBN;ERCC6;XRCC6;MSH6;XPA;CUL4B;GTF2H3;RAD…	vascular
360	WikiPathway_2023_Human__Arrhythmogenic Right Ventricular Cardiomyopathy WP2118	-0.308996	-2.03993	0	0.0114596	0.958	31/73	18.40%	DES;ITGA11;ITGA7;CACNA2D2;CACNB2;CTNNA3;ACTN2;ITGA4;CACNG3;CACNG4;DMD;CACNA2D3;CACNA1S;SGCA;PKP2;CACNG8;LAMA2;SGCG;CACNA1F;CACNB1;DSG2;CACNG7;CACNA2D4;ITGB8;CTNNA2;CACNG5;RYR2;SLC8A1;CACNG2;SGCD;JUP	vascular
361	GO_Cellular_Component_2023__Mitochondrial Inner Membrane (GO:0005743)	-0.22348	-2.03898	0	0.0115205	0.958	255/356	57.32%	CYP24A1;CKMT1A;ATP5MC1;ATP5PO;NDUFA4;SLC25A22;ATP5F1D;LDHB;NDUFAF3;NDUFS5;MGARP;ATP5MC3;NDUFC2;IFI6;CYC1;CYP1A1;UQCRH;TIMM10;NDUFB10;COA3;NDUFB8;COX8A;MRPL36;NDUFB7;NDUFB5;NDUFA1;COX5A;SLC25A4;SDHD;SLC25A5;COX6B1;COX7C;NDUFB11;NDUFA8;COX6A1;COX5B;UQCR10;TIMM13;COX4I1;CYCS;AURKAIP1;NDUFS3;MICOS13;NDUFA13;MRPL11;MRPL51;NME4;TIMM17B;MRPS34;GADD45GIP1;TMEM160;MRPL41;UQCRB;COX7B;NDUFB2;SMDT1;ATP5MJ;AT…	vascular
362	GO_Cellular_Component_2023__Cytoplasmic Stress Granule (GO:0010494)	0.224402	2.03806	0.00584795	0.0557506	0.899	55/73	41.67%	IGF2BP1;IGF2BP2;PABPC1L;ZFP36;GRB7;PABPC4L;RBPMS;MBNL1;LARP1B;LARP4;HIPK2;TRIM25;DYRK3;RBM4;ZFAND1;ATXN2L;NUFIP2;PABPC4;RPTOR;LARP4B;LARP1;HABP4;YTHDF1;YTHDF2;PUM1;LSM14A;TIAL1;YTHDF3;GIGYF2;PUM2;RC3H1;DHX36;CAPRIN1;STAU1;EIF4E;FXR1;CELF1;ROCK1;FMR1;DDX6;TIA1;KPNB1;EIF2S1;G3BP1;VCP;ELAVL1;PABPC1;DDX3X;FXR2;EIF4G1;EIF3B;DDX19A;G3BP2;OGFOD1;ZNFX1	vascular
363	GO_Biological_Process_2023__Negative Regulation Of Wound Healing (GO:0061045)	0.351842	2.03535	0.00374532	0.0559748	0.908	10/25	11.42%	MMRN1;EDN1;ALOX5;THBD;SERPINE1;EPPK1;CD109;FGF2;AJAP1;MYOZ1	vascular
364	WikiPathway_2023_Human__Cardiac Progenitor Differentiation WP2406	-0.357	-2.0341	0.00384615	0.0120422	0.964	25/43	29.41%	THY1;MESP1;IGF1;PDGFRA;DKK1;NOG;IGF2;ANPEP;SIRPA;NODAL;KIT;BMP4;ACTC1;INHBA;NCAM1;MIXL1;NRG1;LIN28B;SOX17;SOX2;SOX1;PAX6;TNNT2;ROR2;TNNI3	vascular
365	GO_Biological_Process_2023__Vesicle-Mediated Transport In Synapse (GO:0099003)	-0.496876	-2.03243	0.00585652	0.0121798	0.967	12/17	26.64%	RAB3A;SNAP25;STX1A;CDK5;CPLX2;VAMP2;SNCA;BRSK1;SYT10;OTOF;PCLO;RIMS1	vascular
366	GO_Biological_Process_2023__Regulation Of ERK1 And ERK2 Cascade (GO:0070372)	-0.23835	-2.03182	0	0.0122056	0.967	95/210	29.29%	IGF1;SLC30A10;CSF1R;ANGPT1;HTR2A;SYK;PDGFRB;FBLN1;PTPRC;MUSK;SCIMP;NTRK3;CD44;PDGFRA;BMP2;FGF1;CCL4;EMILIN1;CCL26;RASGRP1;FSHR;CCL5;NTRK1;GPNMB;CD4;SIRPA;CCL2;DDT;THPO;NODAL;FGFR2;NDRG4;PDGFD;WNK2;TNFAIP8L3;HTR2C;GSTP1;LMO3;PYCARD;ERBB4;APOE;CIB1;IL1B;SLAMF1;FGF10;GLIPR2;PLA2G5;PIN1;C5AR1;ROS1;RGS14;ROR1;NPNT;PRKCZ;CCL24;DUSP26;CCN2;PHB2;SEMA7A;GPER1;NELL1;HTR2B;NRG1;EPHB1;ARRB1;PDGFA;CD74;CHRNA7…	vascular
367	GO_Biological_Process_2023__Positive Regulation Of Transcription By RNA Polymerase III (GO:0045945)	0.44568	2.02501	0.00974026	0.058705	0.921	15/15	55.47%	ELL;ZNF143;ZC3H8;RPTOR;ICE2;MTOR;CHD8;SF3B1;BAZ1B;ICE1;SMARCA5;ERCC6;DEK;DDX21;MYBBP1A	vascular
368	GO_Biological_Process_2023__tRNA Modification (GO:0006400)	0.235173	2.02487	0	0.0579513	0.921	60/67	62.12%	DUS4L;MOCS3;PUSL1;TRMT9B;ANKRD16;PUS7;WDR4;TRMT6;PUS10;NSUN6;BCDIN3D;ALKBH1;METTL8;THUMPD2;TRMT44;TYW5;TYW1B;METTL2B;QTRT2;DUS2;MTO1;THADA;DTWD1;CDKAL1;NSUN2;TYW1;THUMPD1;TYW3;SARS1;THUMPD3;OSGEP;TRMT13;TRIT1;TRMT12;TARBP1;ALKBH8;TPRKB;TRDMT1;METTL6;PUS1;ELP5;TRUB1;WDR6;DUS1L;DTWD2;PUS3;AARS2;URM1;FTSJ1;THG1L;QTRT1;TRMO;SSB;TRMT10A;TRMT1;GTPBP3;GON7;YRDC;TRMT61A;CTU1	vascular
369	KEGG_2021_Human__Insulin secretion	-0.300773	-2.0231	0	0.0131674	0.972	34/78	22.39%	RAB3A;CCK;ATP1A3;KCNJ11;SNAP25;STX1A;ATP1B1;ADCYAP1R1;ADCY5;ATP1A2;ATP1A4;PRKCG;ABCC8;CACNA1S;CAMK2A;ADCY1;ATP1B2;VAMP2;SLC2A2;CAMK2B;KCNMB1;CREB3L1;CACNA1F;ADCY8;KCNN1;KCNMB2;PLCB2;FXYD2;RYR2;KCNMA1;CACNA1D;ADCY7;ADCYAP1;KCNU1	vascular
370	GO_Biological_Process_2023__Sensory Perception Of Bitter Taste (GO:0050913)	0.394603	2.02237	0.00390625	0.057785	0.922	11/20	14.33%	TAS2R5;TAS2R43;TAS2R50;TAS2R3;TAS2R19;TAS2R30;TAS2R10;TAS2R13;TAS2R46;TAS2R20;TAS2R14	vascular
371	GO_Biological_Process_2023__Regulation Of Defense Response (GO:0031347)	0.211351	2.02151	0	0.0573336	0.924	31/88	17.78%	PTGS2;SELE;ADAMTS12;ALOX5;IL1RL2;GATA6;NLRP8;NLRP1;CASP4;BCL6;FGR;IGF2BP1;LRP8;NOD2;NLRP7;CGAS;AGER;NLRP5;SBNO2;CASP8;IL1R1;USP18;FBXL2;NLRP4;BIRC3;AKNA;SAMHD1;JAK2;CYLD;HERC5;PSMA6	vascular
372	GO_Cellular_Component_2023__Sarcoplasmic Reticulum (GO:0016529)	-0.351291	-2.01956	0.00261438	0.0135954	0.974	30/44	39.16%	CASQ1;THBS1;SLN;CASQ2;HRC;FKBP1B;RYR3;ANK3;RTN2;MRLN;PLN;JSRP1;HAX1;RYR2;NOS1;CCDC78;ATP2A3;KLHL41;FSD2;ITPR1;THBS4;JPH1;S100A1;RYR1;TRDN;SRI;FKBP1A;ATP2A1;TMEM38A;NOS1AP	vascular
373	WikiPathway_2023_Human__Hair Follicle Development Organogenesis Part 2 Of 3 WP2839	-0.396133	-2.01954	0.00402685	0.0135555	0.974	18/31	26.07%	TP63;PDGFRA;FGF1;RUNX2;EDA;FGFR2;BMP4;WNT5A;INHBA;NCAM1;CDH1;CCND1;GLI1;PDGFA;SMO;CCND2;SHH;EDAR	vascular
374	GO_Biological_Process_2023__Positive Regulation Of Ossification (GO:0045778)	-0.365746	-2.01727	0.00131406	0.0137664	0.976	23/40	29.07%	PTN;BMP2;SOX11;BMPR1B;ISG15;FZD9;BMPR1A;TFAP2A;BMP4;WNT5A;GPM6B;SLC8A1;WNT4;NELL1;FBN2;PKDCC;TMEM119;PTH;P2RX7;BMP7;SLC20A2;KL;ATRAID	vascular
375	GO_Biological_Process_2023__Leukocyte Adhesion To Vascular Endothelial Cell (GO:0061756)	0.392457	2.01519	0.00301205	0.0587992	0.928	9/19	12.29%	SELE;SELP;ITGB7;VCAM1;GCNT1;LRG1;MADCAM1;SELL;JAM2	vascular
376	GO_Biological_Process_2023__Negative Regulation Of Axonogenesis (GO:0050771)	-0.457831	-2.01501	0.00300752	0.0140188	0.976	13/22	24.53%	THY1;MAG;KIAA0319;SEMA3G;FGF13;RTN4R;TRIM46;PTPRS;MCF2;EFNB3;DCC;LRP4;MT3	vascular
377	GO_Biological_Process_2023__Regulation Of Actin Cytoskeleton Organization (GO:0032956)	-0.292089	-2.01497	0	0.0139722	0.976	58/88	44.50%	RAC3;CORO1A;SH3BP1;FZD10;CSF1R;PDGFRB;CARMIL2;PDGFRA;DAAM2;DYNLL1;EFNA5;LRP1;CORO2B;MYO3A;ARHGAP44;PAK1;BST2;BST1;ARHGDIB;CELSR1;GPM6B;HAX1;EPHA5;PAK3;NRG1;SEMA3E;PDGFA;IQGAP2;FSCN1;ARHGEF5;HRAS;PEAK3;TWF2;EPS8;NOTCH2;MDK;GRHL3;TESK1;RHOA;SLC4A2;ESAM;F11R;MLST8;RNH1;DMTN;PRKCD;SMIM22;MYO3B;EPHA3;BAIAP2;RHOG;RAC1;HCK;EZR;DAPK3;CAPN10;ARHGDIA;CLU	vascular
378	GO_Biological_Process_2023__Dendrite Morphogenesis (GO:0048813)	-0.376657	-2.01073	0	0.0144418	0.98	18/35	24.96%	MAPK8IP2;PTN;DOCK10;ZNF365;SDC2;WNT7A;CELSR2;EPHB3;SHANK1;CTNNA2;PAK3;CTNND2;EPHB1;CHRNA7;LRP4;DLG4;DCDC2;EPHB2	vascular
379	GO_Biological_Process_2023__Regulation Of Dendrite Development (GO:0050773)	-0.358932	-2.00537	0.00127714	0.0150587	0.981	22/40	28.83%	LZTS1;SEZ6;PTN;SDC2;MGARP;KIAA0319;SEMA4D;PACSIN1;MARK1;BCL11A;TNIK;CHRNB2;DCC;KNDC1;CSMD3;COBL;ALK;VLDLR;HECW1;HECW2;BMP7;MFSD2A	vascular
380	GO_Biological_Process_2023__Vesicle-Mediated Transport To The Plasma Membrane (GO:0098876)	0.217632	2.00475	0	0.061732	0.941	68/78	59.32%	EHD4;RAB17;EXOC6;ARFGEF2;MICALL2;VTI1A;SNX7;DENND1A;STX12;EXOC6B;RAB11FIP3;MICALL1;CCDC93;OSBPL5;EXOC8;VPS51;VPS39;LMTK2;EXOC2;EIPR1;VAMP4;ANKRD27;GGA3;GGA2;VPS53;VPS35L;EXOC4;VPS26C;STX6;COMMD1;RABEP1;EPS15;RAB10;SNX27;EXOC5;VPS50;SNX4;VPS26A;STX16;GOPC;SEC16A;WASHC2C;DENND1B;VPS29;HGS;ENTR1;PTPN23;EXOC7;GGA1;VPS52;ANKRD50;EHD1;SNX3;RAB35;RAB14;CMTM6;SNF8;VPS35;SNX33;BLTP1;ARL3;EHD2;WASHC1;CCDC2…	vascular
381	GO_Molecular_Function_2023__Amyloid-Beta Binding (GO:0001540)	-0.301199	-2.0039	0.00119048	0.015196	0.983	52/78	41.69%	ATP1A3;MAPK8IP2;LILRB1;CRYAB;GRIN1;C1QA;GRIA4;ITM2A;ITM2C;BCHE;SORL1;LRP1;NLGN1;APBA2;ITGAM;APOE;ITGB2;GRIA1;GRIN2B;COL25A1;PGRMC1;GRIA2;GRIN2A;PFDN2;CD74;CHRNA7;LILRB3;CD36;PFDN4;CACNA1B;PFDN6;EPHB2;MSR1;TLR4;GRIA3;CST3;LRPAP1;TLR6;PRNP;LILRB2;CACNA1A;CALCR;APOA1;FZD5;IAPP;APBB3;TREM2;VBP1;FPR2;ITM2B;LDLRAP1;APBB1	vascular
382	GO_Biological_Process_2023__Activation Of Protein Kinase B Activity (GO:0032148)	-0.432803	-2.00337	0.00590842	0.0151998	0.983	13/23	24.53%	IGF1;NTRK3;FGF1;ADRA2B;WNT5A;PPIA;ANG;IL18;TXN;NRG1;ADRA2C;PARK7;MT3	vascular
383	GO_Molecular_Function_2023__Histone Acetyltransferase Activity (GO:0004402)	0.342703	2.00243	0.00414938	0.0617491	0.943	26/26	65.78%	BRCA2;BAZ1A;SRCAP;KAT6A;TAF1;TADA2A;NCOA3;KAT7;HAT1;EP300;MCM3AP;NAA50;ATF2;CLOCK;CREBBP;KAT6B;KAT2B;USP22;ING3;NAA40;NAA60;KAT14;KAT5;KAT2A;TAF9;TAF10	vascular
384	GO_Biological_Process_2023__Positive Regulation Of Double-Strand Break Repair Via Homologous Recombination (GO:1905168)	0.297531	2.00196	0.00431034	0.0611973	0.944	35/35	70.31%	RUVBL1;MRNIP;RUVBL2;HELQ;ARID2;TRRAP;EPC1;MMS19;MBTD1;EPC2;EP400;FUS;WDR48;ACTL6A;ING3;ERCC6;ACTR2;BRD8;YEATS4;MRGBP;PIAS4;TIMELESS;MORF4L1;MEAF6;KAT5;OOEP;PARP1;VPS72;HDGFL2;WRAP53;FANCB;MORF4L2;WAS;DMAP1;RAD51AP1	vascular
385	GO_Biological_Process_2023__Positive Regulation Of Axon Extension (GO:0045773)	-0.485442	-2.00175	0	0.0154538	0.985	11/18	26.82%	L1CAM;SEMA5A;MAPT;NTN1;SHTN1;ISLR2;SEMA7A;NELL1;TWF2;DSCAM;VEGFA	vascular
386	GO_Biological_Process_2023__Presynaptic Endocytosis (GO:0140238)	-0.397356	-1.99972	0.00527009	0.0157062	0.988	19/30	33.86%	SNCB;STX1A;SYT5;CDK5;NLGN4Y;PACSIN1;DNM1;SNCG;VAMP2;SYT1;NLGN1;SNCA;NLGN4X;NLGN3;SYT2;STON2;AP2S1;AP2M1;STON1	vascular
387	GO_Biological_Process_2023__Cell Junction Maintenance (GO:0034331)	-0.497547	-1.99955	0.00583942	0.015672	0.988	13/17	32.08%	CSF1R;KIRREL1;CHCHD10;CBLN3;CLDN1;PARD6A;CD177;NLGN1;PRTN3;CBLN2;CBLN1;MYADM;F2RL1	vascular
388	KEGG_2021_Human__Lysine degradation	0.239866	1.9988	0	0.0615467	0.944	52/63	52.64%	PRDM16;MECOM;PRDM6;BBOX1;SMYD2;PLOD2;PIPOX;KMT5C;EZH2;DOT1L;DHTKD1;EHHADH;SETDB2;ALDH7A1;CAMKMT;AASS;NSD2;PHYKPL;SETDB1;SETD7;SMYD3;EHMT1;PRDM2;KMT2E;NSD1;ASH1L;SETD2;NSD3;KMT2C;KMT2A;KMT5B;TMLHE;KMT2D;HADHA;ALDH3A2;DLST;DLD;EZH1;KMT5A;SETD1B;ALDH2;HYKK;HADH;PLOD3;ACAT1;SETD1A;COLGALT1;EHMT2;KMT2B;SUV39H2;ALDH9A1;GCDH	vascular
389	GO_Biological_Process_2023__Chloride Transport (GO:0006821)	-0.303205	-1.9987	0	0.0157216	0.988	32/74	20.21%	ANO3;GABRA1;GABRA5;GLRA2;SLC6A1;SLC1A3;GABRE;CLIC3;SLC4A8;GABRG2;ANO4;SLC12A5;BEST1;FXYD1;SLC17A7;GLRA1;GABRA4;SLC26A9;GLRB;SLC4A10;CLCN1;TTYH1;CFTR;GABRB2;GLRA3;SLC12A7;NMUR1;GABRA6;GABRG3;SLC5A1;CLIC5;SLC12A1	vascular
390	WikiPathway_2023_Human__TNF Related Weak Inducer Of Apoptosis TWEAK Signaling Pathway WP2036	0.285501	1.99777	0	0.0612255	0.946	26/37	36.24%	TRAF1;CASP8;TNFRSF12A;RELB;BIRC3;IKBKB;NFKBIB;TRAF2;CASP7;CTNNB1;MAP3K14;NFKB2;MAPK14;CASP3;HDAC1;TRAF5;RIPK1;BIRC2;AKT2;MAP3K7;MAPK8;NFKB1;RAF1;GSK3B;MAPK1;MAPK9	vascular
391	GO_Biological_Process_2023__Dendritic Spine Morphogenesis (GO:0060997)	-0.513911	-1.99758	0.0030581	0.0157958	0.988	10/15	24.96%	DOCK10;ZNF365;WNT7A;EPHB3;SHANK1;PAK3;CTNND2;EPHB1;DLG4;EPHB2	vascular
392	GO_Biological_Process_2023__Positive Regulation Of Homotypic Cell-Cell Adhesion (GO:0034112)	0.427433	1.99545	0.00660066	0.061354	0.95	9/15	18.98%	IL6;MMRN1;MFSD2B;PDPN;EMILIN2;GP6;PLAUR;JAK2;IL6ST	vascular
393	GO_Cellular_Component_2023__Cation Channel Complex (GO:0034703)	-0.336193	-1.99493	0.00391134	0.0161019	0.99	21/49	19.21%	KCNK1;CNGA1;TRPC3;CALM3;CASQ2;TRPC4;PKD2L1;KCNAB1;FKBP1B;KCNA5;CALM1;CALM2;RYR3;TRPC6;UNC80;KCNA6;SCNN1D;RYR2;CNGA4;TRPM2;TRPC5	vascular
394	GO_Biological_Process_2023__Regulation Of Granulocyte Chemotaxis (GO:0071622)	-0.479043	-1.99439	0.00283688	0.0161303	0.99	11/18	24.13%	CSF1R;THBS1;RARRES2;CCL5;IL34;BST1;CMKLR1;JAM3;S100A14;CXCL17;MDK	vascular
395	GO_Biological_Process_2023__Negative Regulation Of Cell Adhesion (GO:0007162)	-0.306761	-1.99301	0	0.0161998	0.99	35/68	29.34%	ARHGDIG;ANGPT1;SNAI2;FBLN1;PTPRC;SEMA5A;SEMA4D;TGFBI;CORO2B;CYP1B1;PLXNB3;PLXNA4;SPOCK1;CDH1;JAM3;PTPRO;PLXNC1;CDH13;NRG1;DACT2;PLG;ERBB3;FZD7;DUSP1;SPINT2;NEXMIF;MDK;DSCAM;KNG1;EPHB2;RND1;PLXNA1;ADAM22;CX3CL1;RHOA	vascular
396	MSigDB_Hallmark_2020__Pancreas Beta Cells	-0.382746	-1.99267	0.0012987	0.0162112	0.991	22/33	37.76%	SST;CHGA;SYT13;DPP4;DCX;NKX6-1;PCSK1;ABCC8;INSM1;SLC2A2;SRP14;PAK3;SPCS1;PCSK2;NKX2-2;GCK;PAX6;LMO2;G6PC2;MAFB;NEUROD1;IAPP	vascular
397	GO_Biological_Process_2023__Gene Expression (GO:0010467)	-0.22728	-1.99082	0	0.0164193	0.992	106/287	26.44%	EEF1A2;H3C1;PRPH2;DDX25;ADARB2;EXOSC4;RPS14;RPL10;RPS23;RPS13;RPL19;RPL3;RPL30;RPL9;FAU;RPS4X;ELAVL4;MRPL36;RPS11;RPL36AL;TESC;RPL29;RPS15;SORL1;RPL10A;RPS27A;RPL7A;RPL7;RPS18;RPS3A;RPS9;RPL32;RPLP2;RPS4Y1;EXOSC5;RPL27A;RPS25;RPL26;RPS16;RPS7;MRPL11;RPL34;MRPL51;RPS28;RPS8;RPL39;GSPT2;STUB1;MRPL41;RPL27;RPS21;RPS5;RPL12;RPL24;RPL15;RPL8;RPS15A;RPL14;RPL41;RPL18A;RPL18;RPS20;RPLP1;RPL13;MRPL43;RPS…	vascular
398	GO_Biological_Process_2023__Negative Regulation Of Neuron Differentiation (GO:0045665)	-0.452942	-1.98934	0.00142653	0.0165825	0.993	13/21	28.27%	DLX1;TUNAR;CNTN4;HES5;B2M;HES1;DLX2;SOX2;DISP3;DTX1;CALR;SOX9;BMP7	vascular
399	GO_Biological_Process_2023__RNA Splicing, Via Transesterification Reactions (GO:0000375)	0.350178	1.98844	0.00347222	0.0633133	0.954	21/24	46.15%	GEMIN2;PRPF3;SNRNP40;SF3B3;SMNDC1;SRSF4;TRA2B;SCAF11;SF3B1;SRSF10;SRRM1;PRPF8;SF3A3;TXNL4A;PRPF4;MPHOSPH10;PRPF6;KHSRP;DDX23;WDR83;DBR1	vascular
400	GO_Biological_Process_2023__Regulation Of Double-Strand Break Repair Via Homologous Recombination (GO:0010569)	0.223647	1.98713	0	0.0629309	0.955	67/70	71.25%	RTEL1;POLQ;CGAS;RAD51;PARPBP;RUVBL1;FIGNL1;HELB;SPIDR;SMCHD1;MRNIP;RUVBL2;HELQ;ARID2;TRRAP;EPC1;MMS19;MBTD1;EPC2;TP53BP1;TRAPPC13;FBH1;KDM1A;EP400;PPP4R2;SETD2;FUS;WDR48;ACTL6A;ING3;SHLD2;ERCC6;UBQLN4;TERF2IP;KLHL15;ACTR2;KMT5A;BRD8;RPA2;YEATS4;MRGBP;PIAS4;PPP4C;TIMELESS;MORF4L1;MAD2L2;MEAF6;KAT5;OOEP;PARP1;VPS72;USP51;HDGFL2;INSL6;WRAP53;SHLD1;FANCB;MORF4L2;SENP3;RMI2;TEX15;WAS;DMAP1;MAGEF1;CHEK…	vascular
401	GO_Molecular_Function_2023__Methylation-Dependent Protein Binding (GO:0140034)	0.23166	1.98637	0	0.0623868	0.956	60/65	64.55%	RAG2;UHRF1;ZMYND8;KDM8;SPIN2B;L3MBTL3;MSL3;MORC4;NCAPG2;CDYL;MPHOSPH8;ZZEF1;PHF8;MBTD1;TP53BP1;CHD1;MORC3;TDRD3;KMT2E;CHD8;SUZ12;ZMYND11;GLYR1;MTF2;BPTF;PHF20L1;FMR1;TRIM24;ZZZ3;KDM5A;SPIN1;PWWP2A;NCAPD3;ING3;MSH6;CBX5;WDR5;L3MBTL2;ING5;SGF29;PHF13;ING4;CBX6;CBX3;ING1;SPIN3;PHF19;RRP8;L3MBTL1;CBX1;KDM7A;PHF1;PYGO1;CXXC1;ZCWPW1;LRWD1;HDGFL2;SPIN2A;ZCWPW2;SPIN4	vascular
402	GO_Cellular_Component_2023__COPII Vesicle Coat (GO:0030127)	0.430481	1.98248	0.00303951	0.0630356	0.959	15/15	56.99%	PDCD6;SEC24D;SEC31B;SEC24C;SEC24A;SEC23B;SEC24B;SEC23A;SEC31A;SAR1A;SAR1B;KLHL12;SEC13;TMED7;PEF1	vascular
403	GO_Biological_Process_2023__Regulation Of Telomere Maintenance (GO:0032204)	0.278336	1.98215	0	0.0624194	0.959	31/38	45.36%	RTEL1;MYC;EID3;PML;SMG1;SMG5;GNL3;SMG6;TERF2;SLF1;HDAC8;POT1;SMC5;YLPM1;NSMCE2;MRE11;SMC6;DHX36;ATRX;XRCC5;USP7;HNRNPD;SLF2;ERCC4;NSMCE4A;NBN;UPF1;TERF2IP;TERF1;NSMCE1;PPP1R10	vascular
404	GO_Biological_Process_2023__Vascular Endothelial Growth Factor Receptor Signaling Pathway (GO:0048010)	0.323792	1.97989	0.00373134	0.0624433	0.959	17/28	27.06%	VEGFD;FLT1;VAV1;FLT4;VEGFC;SULF1;DAB2IP;PDCD6;PRKD2;SLC31A1;BCAR1;PTK2B;MAPK14;PRKD1;MAPKAPK3;FYN;MAPKAPK2	vascular
405	GO_Biological_Process_2023__miRNA Processing (GO:0035196)	0.310598	1.97909	0.00380228	0.0620593	0.961	27/32	44.91%	TRIM71;PUS10;BCDIN3D;SMAD3;DROSHA;AGO4;AGO1;ZC3H7A;DGCR8;PRKRA;AGO2;TUT7;NCBP1;DICER1;DDX5;PUM1;TUT4;SMAD2;AGO3;PUM2;HNRNPA2B1;METTL3;ZC3H7B;SNIP1;SRRT;GARS1;SRSF3	vascular
406	GO_Biological_Process_2023__Positive Regulation Of DNA Recombination (GO:0045911)	0.253656	1.97721	0	0.0620705	0.961	49/50	71.64%	KMT5C;RUVBL1;MRNIP;RUVBL2;HELQ;ARID2;TRRAP;EPC1;MMS19;MBTD1;EPC2;TP53BP1;TRAPPC13;EP400;FUS;WDR48;KMT5B;HMCES;ACTL6A;ING3;SHLD2;ERCC6;ACTR2;BRD8;PAXIP1;ERCC2;YEATS4;MRGBP;PIAS4;TIMELESS;MORF4L1;MAD2L2;MEAF6;KAT5;OOEP;ZCWPW1;PARP1;VPS72;PRDM9;HDGFL2;INSL6;WRAP53;SHLD1;FANCB;MORF4L2;WAS;DMAP1;RAD51AP1;TFRC	vascular
407	GO_Molecular_Function_2023__Polyubiquitin Modification-Dependent Protein Binding (GO:0031593)	0.255024	1.97527	0.00480769	0.0620975	0.963	47/52	61.04%	DEPDC1B;UBQLNL;IKBKE;TNFAIP3;BABAM2;AGAP3;WDR81;UFD1;TOM1;RAD18;ZRANB3;RNF169;ZBTB1;SPRTN;OTUD7B;RNF168;TAB3;ASCC2;UIMC1;TAB2;ZFAND6;ZRANB1;EPS15;UBQLN1;RAD23B;SQSTM1;PRPF8;MINDY2;VCP;ABRAXAS2;UBQLN4;PSMD4;ATRIP;BAG6;HDAC6;RNF31;DZIP3;TNIP2;MINDY1;IKBKG;OPTN;SHARPIN;PARP10;TNIP3;RAD23A;UBQLN2;FAAP20	vascular
408	GO_Biological_Process_2023__Regulation Of Calcium Ion Transmembrane Transporter Activity (GO:1901019)	-0.401192	-1.97168	0.00415512	0.0191526	0.997	14/28	17.79%	JPH4;SLN;CACNB2;HRC;FKBP1B;DMD;CALM1;CALM2;JPH3;CACNB1;PLN;ANK2;JSRP1;NOS1	vascular
409	GO_Cellular_Component_2023__Organelle Inner Membrane (GO:0019866)	-0.214909	-1.97141	0	0.0191438	0.997	268/380	57.32%	CYP24A1;CKMT1A;ATP5MC1;ATP5PO;NDUFA4;SLC25A22;ATP5F1D;LDHB;NDUFAF3;NDUFS5;MGARP;ATP5MC3;IFI27;NDUFC2;IFI6;CYC1;CYP1A1;UQCRH;TIMM10;NDUFB10;COA3;NEU4;NDUFB8;COX8A;MRPL36;NDUFB7;NDUFB5;NDUFA1;COX5A;SLC25A4;SDHD;SLC25A5;COX6B1;COX7C;NDUFB11;NDUFA8;COX6A1;COX5B;UQCR10;TIMM13;COX4I1;CYCS;AURKAIP1;NDUFS3;MICOS13;NDUFA13;MRPL11;MRPL51;NME4;TIMM17B;MRPS34;GHRHR;GADD45GIP1;TMEM160;MRPL41;UQCRB;COX7B;NDUFB…	vascular
410	GO_Biological_Process_2023__Response To BMP (GO:0071772)	-0.44907	-1.97108	0.00561798	0.0191539	0.997	10/21	10.05%	DLX1;BMP2;VSTM2A;BMPR1B;SFRP1;RUNX2;ADAMTS7;BMPR1A;BMP4;DLX5	vascular
411	MSigDB_Hallmark_2020__Interferon Gamma Response	0.16391	1.97047	0	0.0630547	0.965	68/196	19.71%	IL6;PNP;PTGS2;CFB;IL4R;PLA2G4A;SELP;HLA-DRB1;MTHFD2;C1R;GBP6;SOCS3;UPP1;IL15RA;ZBP1;MX2;ITGB7;VCAM1;CSF2RB;CASP4;SECTM1;CIITA;WARS1;CDKN1A;ARID5B;ICAM1;IFI30;STAT3;IRF4;GCH1;PLSCR1;IDO1;CASP8;NLRC5;USP18;IL18BP;IFNAR2;TNFAIP3;ISG20;ST8SIA4;NOD1;HLA-DMA;NAMPT;PELI1;PTPN6;IL15;MVP;EPSTI1;CFH;PFKP;PML;SAMHD1;CD40;PSMA2;C1S;FAS;JAK2;HELZ2;TRIM14;BATF2;SP110;PARP14;NMI;CASP7;LCP2;IFI44;TRIM25;PARP12	vascular
412	GO_Biological_Process_2023__Regulation Of miRNA-mediated Gene Silencing (GO:0060964)	0.421162	1.97006	0.00320513	0.0625088	0.965	13/15	39.90%	POU5F1;TRIM71;PPARG;ZFP36;LIMD1;PUM1;DHX9;TIAL1;PUM2;FXR1;FMR1;ELAVL1;EIF4G1	vascular
413	GO_Molecular_Function_2023__Cell Adhesion Mediator Activity (GO:0098631)	-0.413112	-1.96901	0.00280505	0.0194249	0.997	16/27	24.15%	CNTN4;CNTN2;SIRPA;CNTN1;PLXNB3;CNTN6;DSCAML1;NFASC;JAM3;CNTN5;EMB;LRRC4C;NTNG1;NRCAM;CD200;DSCAM	vascular
414	GO_Biological_Process_2023__Regulation Of Cytosolic Calcium Ion Concentration (GO:0051480)	-0.357891	-1.96855	0	0.0194475	0.997	18/39	19.21%	TUNAR;TRPC3;HRC;CALB1;CALB2;TRPC4;ATP2B3;SLC8A2;FKBP1B;FZD9;ATP2B2;WNT5A;PLN;TRPC6;RYR2;GPER1;TRPM2;TRPC5	vascular
415	GO_Biological_Process_2023__Cardiac Muscle Cell Action Potential (GO:0086001)	-0.399091	-1.96538	0.00414938	0.0199243	0.997	16/29	21.57%	SCN2B;ATP1B1;ATP1A2;CACNA1G;SCN4B;SCN1A;DMD;SCN3B;PKP2;KCNH2;HCN2;SLC4A3;SLC8A1;SCN1B;KCND3;CACNA1D	vascular
416	KEGG_2021_Human__Olfactory transduction	-0.278168	-1.96536	0	0.0198652	0.997	66/97	43.18%	OR7C1;CALM3;PRKG1;OR51E2;CALML4;SLC8A2;PDE1A;OR2A42;CALM1;CAMK2A;CALM2;OR2L5;OR2L2;PDE1C;OR2G6;OR5H14;GNG13;OR52A1;CAMK2B;OR1F1;OR51D1;OR2L3;OR3A2;SLC8A1;SLC8A3;SLC24A4;CNGA4;OR51I2;ARRB1;OR2F1;OR6A2;PRKG2;NCALD;OR2B11;OR10H5;OR6J1;OR2A14;OR51M1;OR56A1;OR51E1;OR2A12;OR4D9;PDE1B;OR5V1;OR2AG2;GRK3;OR52H1;OR2A25;OR2M4;OR4D1;RGS2;OR2M3;CNGA3;GUCY2D;ADCY3;GNG7;OR10AC1;PDE2A;OR2M2;OR1L8;OR1I1;ARRB2;OR2…	vascular
417	GO_Biological_Process_2023__Carboxylic Acid Metabolic Process (GO:0019752)	0.33545	1.96523	0.0070922	0.0635959	0.967	14/28	18.64%	PLA2G4A;AMH;CSGALNACT1;SIRT4;PCK1;PON3;CYP4F3;PON1;SLC2A3;SLC2A1;ST3GAL1;GSTO2;LIPT1;GNE	vascular
418	WikiPathway_2023_Human__Zinc Homeostasis WP3529	-0.376152	-1.96504	0.00393701	0.0198544	0.997	21/33	36.37%	SLC30A10;MT1F;SLC30A8;MT1G;SLC30A3;MT1E;MT1M;SLC39A1;SLC39A10;MT2A;SLC39A3;SLC39A4;SLC30A2;MT1X;SLC30A1;MT3;SLC39A7;SLC39A13;SLC39A14;SLC39A8;MT1H	vascular
419	GO_Molecular_Function_2023__High Voltage-Gated Calcium Channel Activity (GO:0008331)	-0.427273	-1.965	0.00564972	0.0197933	0.997	14/23	23.45%	CACNA1G;CACNB2;SCN7A;SCN1A;CACNA1S;CACNA1H;CACNA1E;CACNA1F;CACNB1;SCN9A;CACNA1I;SCN8A;CACNA1D;CACNA1B	vascular
420	GO_Biological_Process_2023__Associative Learning (GO:0008306)	-0.469381	-1.96468	0.00567376	0.0197775	0.997	10/18	18.19%	SLC6A1;DRD1;GRIN1;NETO1;CHRNB2;SHANK1;BRSK1;RGS14;MAP1A;FOXB1	vascular
421	GO_Biological_Process_2023__Internal Peptidyl-Lysine Acetylation (GO:0018393)	0.284588	1.96316	0.0047619	0.0636823	0.967	36/37	67.60%	RUVBL1;RUVBL2;TAF5L;TADA2A;TRRAP;KAT7;EPC1;MBTD1;EPC2;EP300;YEATS2;EP400;CREBBP;PHF20L1;KAT2B;ACTL6A;ING3;SUPT3H;ATAT1;BRD8;TAF12;YEATS4;MRGBP;BAG6;KAT14;MORF4L1;MEAF6;KAT5;KAT2A;VPS72;TADA3;MORF4L2;TAF9;TAF6L;TAF10;DMAP1	vascular
422	GO_Molecular_Function_2023__Serotonin Receptor Activity (GO:0099589)	-0.42497	-1.96044	0.00702247	0.0204407	0.997	17/24	31.02%	HTR1A;HTR1F;HTR2A;CHRM4;HRH3;HRH2;CHRM2;HTR2C;HTR5A;HTR7;HTR2B;DRD4;CHRM5;HTR1E;CHRM3;HTR3C;HTR6	vascular
423	GO_Biological_Process_2023__Activation Of Phospholipase C Activity (GO:0007202)	-0.408085	-1.96009	0.00410959	0.0204466	0.997	14/26	18.60%	AVPR1A;HTR2A;P2RY12;EDNRA;CD86;S1PR4;ARHGAP6;LPAR1;ANG;NMUR1;C5AR1;PLCB2;PHB2;HTR2B	vascular
424	WikiPathway_2023_Human__DNA IR Double Strand Breaks And Cellular Response Via ATM WP3959	0.251413	1.95664	0.00904977	0.0653852	0.969	39/55	39.18%	CHEK2;CDC25C;CDKN2A;BRCA2;RAD51;RASSF1;E2F1;EXO1;CASP9;RAD9A;HSF1;MCPH1;CASP3;STK3;MDC1;RAD52;MDM2;ABL1;TERF2;TRAF6;ATR;TP53;RAD17;DCLRE1C;ATM;TP53BP1;MRE11;APAF1;YAP1;ATF2;PRKDC;LATS1;RNF8;SMC1A;RIF1;SMC3;ACTL6A;NBN;UPF1	vascular
425	GO_Molecular_Function_2023__Sodium Channel Activity (GO:0005272)	-0.366543	-1.95652	0.00135135	0.0210724	0.998	23/36	32.73%	KCNK1;SLC4A11;SCN4B;PKD2L1;HCN3;NALCN;SCN1A;HCN1;HCN2;SCN9A;TRPM5;SCNN1D;SCN8A;GRIK4;SCN1B;GRIK3;ASIC4;GRIK1;ASIC3;HCN4;GRIK2;ASIC2;GRIK5	vascular
426	GO_Biological_Process_2023__Negative Regulation Of Axon Extension (GO:0030517)	-0.388232	-1.95527	0	0.0211833	0.998	15/30	18.80%	MAG;SEMA3D;SEMA3C;SEMA5A;KIAA0319;SEMA4D;SEMA3G;RTN4R;TRIM46;SEMA6D;PTPRS;SEMA5B;SEMA3A;SEMA7A;SEMA3E	vascular
427	GO_Biological_Process_2023__Chemical Synaptic Transmission, Postsynaptic (GO:0099565)	-0.428178	-1.9551	0.00277393	0.0211297	0.998	16/25	30.21%	MAPK8IP2;GRIN1;INSYN2B;INSYN1;GRID2;NPFF;GLRA1;CHRNA4;GRIN2C;GRIN2B;GRIN2A;NLGN3;DRD4;GRIN2D;GSK3A;NPAS4	vascular
428	GO_Biological_Process_2023__Ventricular Septum Morphogenesis (GO:0060412)	-0.402706	-1.95131	0.00426136	0.0217322	0.998	13/26	19.03%	HEYL;SOX4;SOX11;NOG;BMPR1A;SLIT2;CITED2;BMP4;ROBO1;HES1;PROX1;HEY2;ZFPM1	vascular
429	GO_Biological_Process_2023__Positive Regulation Of Response To Wounding (GO:1903036)	-0.431444	-1.94971	0.00415512	0.0219176	0.998	17/23	38.85%	PTN;ADRA2A;CLEC7A;CLDN1;INSL3;MYLK;HBEGF;HRAS;MDK;CLDN4;VTN;DUOX1;SCARF1;DMTN;GRN;ANXA1;OCLN	vascular
430	GO_Biological_Process_2023__Monoatomic Cation Transport (GO:0006812)	-0.353128	-1.94952	0.00130039	0.0218881	0.998	23/40	30.99%	CLDN16;CNGA1;ANO1;ATP1B1;ATP1A2;GRIN1;PKD2L1;GRIN2C;TRPC6;PIEZO2;TRPM3;SLC39A1;TMEM63C;GRIN2B;GRIN2A;PANX2;CNGA4;LRP2;CHRNB1;HCN4;GRIN2D;CALHM1;SLC29A4	vascular
431	GO_Cellular_Component_2023__Voltage-Gated Calcium Channel Complex (GO:0005891)	-0.340863	-1.94825	0.00514139	0.0220411	0.998	35/45	46.26%	CACNA2D2;CACNA1G;CACNB2;SCN7A;HSPA2;SCN1A;CACNG3;CACNA2D3;CACNA1S;CACNA1H;CACNG8;CACNA1E;CACNA1F;CACNB1;SCN9A;CACNG7;CACNA2D4;CACNA1I;SCN8A;CACNA1D;CACHD1;CACNA1B;CATSPERD;CACNA1A;CACNA2D1;PDE4B;SCN3A;SCN2A;CATSPER3;TMEM249;CACNB3;CACNB4;CATSPERG;SCN11A;SCN10A	vascular
432	KEGG_2021_Human__Inflammatory bowel disease	0.236878	1.94776	0	0.0685355	0.971	15/55	7.66%	IL6;IL18R1;IL4R;HLA-DRB1;HLA-DRB5;HLA-DPA1;IFNGR1;IL2RG;TLR2;HLA-DOA;HLA-DQA2;IL12A;NFATC1;NOD2;STAT3	vascular
433	KEGG_2021_Human__Systemic lupus erythematosus	0.205288	1.94447	0	0.0685733	0.971	31/87	16.43%	H2AC15;H2AC8;H4C4;C7;H3C6;HLA-DRB1;HLA-DRB5;H4C2;H2AC11;C1R;HLA-DPA1;H2BC18;H2BC14;CD80;H3C10;H2BC11;H4C8;HLA-DOA;H2BC5;HLA-DQA2;H2BC15;C2;H4C5;HLA-DMA;H2BC6;H2AC16;ACTN1;C5;CD40;C1S;H2BC4	vascular
434	GO_Biological_Process_2023__Positive Regulation Of Cell Projection Organization (GO:0031346)	-0.263457	-1.94154	0	0.0232739	0.999	62/116	36.88%	STMN2;MUSK;CARMIL2;NTRK3;PTN;GPC2;SLITRK1;PTK7;NTRK1;IL1RAPL1;NDRG4;ATP1B2;SLIT2;PLPPR5;PLXNB3;NLGN1;PLXNA4;ROBO1;WNT5A;CAMK2B;APOE;DPYSL3;ZNF804A;CAMK1;CUX2;SERPINI1;NDNF;ROR1;PTPRD;TENM3;PLXNC1;SCN1B;FUT9;NTRK2;PTK6;RIT2;TWF2;DLG4;DDR2;LRRC7;MDK;ROBO2;TNN;PLK5;DDR1;BDNF;AMIGO1;PLXNA1;RELN;MAP6;CX3CL1;ROR2;SCARF1;S100A9;PLA2G3;CUL7;LTK;MAGI2;PLXNA3;EPHA3;METRN;TIAM1	vascular
435	GO_Biological_Process_2023__Positive Regulation Of Double-Strand Break Repair (GO:2000781)	0.210626	1.94131	0	0.069376	0.975	79/83	71.25%	FOXM1;SPIRE2;KMT5C;RUVBL1;KDM4D;DDX11;SMARCA2;SPIDR;SMCHD1;MRNIP;PNKP;RUVBL2;PHF10;SMARCC1;SLF1;HELQ;ARID2;MGMT;TRRAP;SMARCE1;EPC1;MMS19;ARID1B;SMARCA4;MBTD1;EPC2;SIRT1;TRAPPC13;SPIRE1;ARID1A;EP400;PBRM1;PRKDC;FUS;WDR48;KMT5B;SLF2;BRD7;ACTL6A;ING3;SHLD2;ERCC6;UBE2V2;DPF2;ACTR2;BRD8;SMARCC2;SMARCB1;BCL7B;BCL7C;YEATS4;MRGBP;PIAS4;SMARCD1;SMARCD2;UBE2N;TIMELESS;MORF4L1;MAD2L2;MEAF6;KAT5;BCL7A;OOEP;Z…	vascular
436	GO_Biological_Process_2023__Purine Nucleoside Bisphosphate Metabolic Process (GO:0034032)	0.355906	1.93889	0.00772201	0.0691399	0.977	9/22	12.53%	ACOT2;BAAT;ACOT1;ACSM5;ACOT12;ACSM1;MLYCD;ACSM6;ACSM3	vascular
437	GO_Biological_Process_2023__Ribonucleoside Bisphosphate Metabolic Process (GO:0033875)	0.355906	1.93889	0.00772201	0.0691399	0.977	9/22	12.53%	ACOT2;BAAT;ACOT1;ACSM5;ACOT12;ACSM1;MLYCD;ACSM6;ACSM3	vascular
438	GO_Biological_Process_2023__Rescue Of Stalled Ribosome (GO:0072344)	0.343439	1.93701	0	0.0691099	0.978	20/23	45.49%	SKIC2;MTRES1;ASCC3;TRIP4;ASCC2;NEMF;RNF14;USP10;KLHDC10;HBS1L;LTN1;SKIC3;TCF25;RCHY1;MTRFR;ANKZF1;GCN1;RNF25;SKIC8;ZNF598	vascular
439	GO_Biological_Process_2023__Blood Circulation (GO:0008015)	-0.333545	-1.93661	0.00255428	0.0241446	1	28/47	34.11%	AVPR1A;EDN3;COL4A3;GUCY1B1;AGTR1;GUCY1A1;OLR1;CXCL10;ADORA2A;ACTC1;DLL4;ELN;SGCG;PLN;CXCL12;C3AR1;HTR7;SOD1;EPO;SGCD;BDKRB2;HCN4;SGCZ;LPA;TNNI3;TRDN;ACVRL1;RANGRF	vascular
440	WikiPathway_2023_Human__ncRNAs Involved In Wnt Signaling In Hepatocellular Carcinoma WP4336	-0.285468	-1.93639	0.00116009	0.0241292	1	33/80	23.98%	PLAU;SERPINF1;FZD10;SFRP4;FZD2;DKK2;DKK1;WNT16;WNT6;SFRP1;NOTUM;FZD9;WNT7A;WNT10B;WNT10A;NKD2;WNT5A;KLF4;WNT2;JUN;CSNK2B;CXXC4;SFRP2;CCND1;ROR1;WNT3;WNT4;SOX7;SOX17;FZD7;WNT11;CCND2;FRAT2	vascular
441	WikiPathway_2023_Human__Nucleotide Excision Repair In Xeroderma Pigmentosum WP5114	0.229867	1.93549	0.00549451	0.0691224	0.979	65/67	72.73%	H4C4;H4C2;H4C8;RFC3;POLD4;POLD1;RFC4;GTF2H4;CHD1L;H4C5;POLE;POLE2;GTF2H2C;DDB2;SLX4IP;RAD18;RFC2;CDK7;CCNH;POLD3;CUL4A;MNAT1;XPC;GTF2H1;POLK;USP7;RAD23B;ERCC8;RFC1;DDB1;ERCC4;RPA1;H3-3A;POLH;UVSSA;ERCC6;XPA;CUL4B;GTF2H3;GTF2H2;RPA2;ERCC2;ERCC3;LIG3;LIG1;HMGN1;BRCA1;XAB2;H4C16;POLE4;XRCC1;H4C3;PCNA;PARP1;POLD2;RAD23A;SLX4;RBX1;ERCC1;GTF2H5;GPS1;RPA3;H3-3B;RFC5;POLE3	vascular
442	GO_Biological_Process_2023__Inner Ear Morphogenesis (GO:0042472)	-0.456529	-1.93428	0.00555556	0.0244505	1	16/20	39.78%	TBX18;USH1C;SIX1;FGFR2;TFAP2A;TTC39C;MYO3A;PAX2;POU3F4;TMIE;EPHB2;SOX9;ZIC1;HPN;MYO3B;PAX8	vascular
443	KEGG_2021_Human__ABC transporters	0.2602	1.93077	0	0.0704634	0.981	20/45	18.16%	ABCC4;ABCC3;ABCC11;ABCA12;DEFB1;ABCC1;ABCC2;ABCC6;ABCA13;ABCB1;ABCD1;ABCA7;ABCB6;ABCA1;ABCA4;ABCB9;ABCC10;ABCG1;ABCD3;ABCA3	vascular
444	GO_Biological_Process_2023__Cellular Response To Metal Ion (GO:0071248)	-0.257631	-1.92991	0	0.0252369	1	52/123	25.68%	SYT4;CRHBP;SYT13;CPNE6;ITPKA;GLRA2;MT1F;SYT5;SYT15;PRKAA2;SLFN14;KCNA1;NEUROD2;ADCY1;TFAP2A;CACNA1H;MT1G;SYT1;NLGN1;GLRA1;MT1E;WNT5A;RYR3;ANK3;B2M;SYT9;SNCA;JUN;ADCY8;CDH1;SYT10;AQP1;MT1M;FOS;CPNE4;CPNE9;MT2A;KCNH1;SYT6;RASA4;ADCY7;MT1X;SYT17;SYT3;PPIF;CPNE7;DLG4;SYT2;MT3;TFR2;SYT7;ALOX5AP	vascular
445	GO_Biological_Process_2023__Phospholipid Translocation (GO:0045332)	0.311836	1.92812	0.00414938	0.0709429	0.982	16/31	21.71%	PLSCR2;ABCC1;ATP10A;ABCB1;ATP8B3;PLSCR5;ABCA7;PLSCR1;PLSCR4;ABCA4;ATP11A;ATP8B2;ATP11C;ATP8B1;ATP10D;ANO6	vascular
446	GO_Biological_Process_2023__Long-Term Synaptic Potentiation (GO:0060291)	-0.432852	-1.92778	0.00140252	0.0256487	1	11/20	19.28%	SLC8A2;PLK2;VAMP2;GRIN2C;SLC24A2;GRIN2B;RGS14;SLC8A3;GRIN2A;PRKCZ;NFATC4	vascular
447	GO_Biological_Process_2023__Regulation Of Response To External Stimulus (GO:0032101)	0.186512	1.92684	0	0.0708022	0.982	38/116	17.78%	PTGS2;SELE;SPAAR;ADAMTS12;ALOX5;IL1RL2;GATA6;NLRP8;CXCR4;NLRP1;CASP4;BCL6;FGR;IGF2BP1;TRIM5;LRP8;F2R;NOD2;NLRP7;CGAS;AGER;GNAT1;NLRP5;SBNO2;CASP8;IL1R1;USP18;EFNB2;CD55;FBXL2;NLRP4;BIRC3;AKNA;SAMHD1;JAK2;CYLD;HERC5;PSMA6	vascular
448	KEGG_2021_Human__Pathways of neurodegeneration	-0.209644	-1.92628	0	0.0259453	1	176/445	29.67%	UCHL1;TUBB2A;DNAL4;FZD10;TUBB4A;NDUFA4L2;COX4I2;FZD2;NEFL;STX1A;TRPC3;CDK5R1;ATP5MC1;ATP5PO;BCL2;CALM3;GPR37;DKK2;DKK1;NDUFA4;WNT16;CHRM1;ATP5F1D;WNT6;DCTN3;GRIN1;CDK5;NDUFS5;ATP5MC3;NDUFC2;GRIA4;CALML4;CYC1;TUBA1A;NEFM;NOS2;PRKCG;MAPK10;UQCRH;NDUFB10;NDUFS7;MAPT;DDIT3;NDUFB8;COX8A;FZD9;WNT7A;WNT10B;NDUFB7;NDUFB5;NEFH;CALM1;CACNA1S;CAMK2A;NDUFA1;CALM2;COX5A;SLC25A4;WNT10A;SDHD;SLC25A5;PSMB6;COX6B…	vascular
449	WikiPathway_2023_Human__Small Ligand GPCRs WP247	-0.479316	-1.92547	0.0057554	0.0260325	1	10/17	16.41%	S1PR3;PTGER1;S1PR4;TBXA2R;LPAR1;S1PR2;PTGER4;PTGFR;CNR1;PTGER3	vascular
450	WikiPathway_2023_Human__Markers Of Kidney Cell Lineage WP5236	-0.321395	-1.92539	0.00254777	0.0259695	1	21/51	17.50%	TBX18;DES;PDGFRB;EYA1;DCN;SIX1;SIX2;TNC;FOXD1;SFRP1;NT5E;NTN1;KIT;BMP4;ALDH1A2;WNT5A;SALL1;OSR1;PAX2;EPO;WNT4	vascular
451	GO_Biological_Process_2023__Calcium-Dependent Cell-Cell Adhesion Via Plasma Membrane Cell Adhesion Molecules (GO:0016339)	-0.359354	-1.92315	0.00537634	0.0263795	1	27/37	39.36%	CDH6;CDH7;CDH8;NLGN1;PCDHB2;CDH12;PCDHB10;CDH3;CDH1;PCDHB14;PCDHB16;CDH13;CDH22;PCDHB6;PCDHB3;PCDHB9;CDH17;CDH18;PCDHB4;PCDHB13;PCDHB11;CDH9;CDH10;CDH4;PCDHB5;CDHR3;PCDHGC3	vascular
452	GO_Cellular_Component_2023__MLL1/2 Complex (GO:0044665)	0.312667	1.92272	0.00760456	0.0721716	0.984	29/30	62.67%	MGAM;RUVBL1;E2F6;RUVBL2;TAF1;TAF4;KANSL1;PHF20;CHD8;MAX;KMT2A;RBBP5;WDR5;PRPF31;HCFC2;RNF2;TEX10;TAF7;KAT8;DPY30;HCFC1;PELP1;KMT2B;MEN1;LAS1L;TAF6;MCRS1;SENP3;TAF9	vascular
453	MSigDB_Hallmark_2020__Protein Secretion	0.200451	1.92162	0	0.072009	0.985	74/94	49.70%	KRT18;ICA1;AP3S1;ABCA1;SEC24D;ARFGEF2;EGFR;RPS6KA3;SCAMP1;SGMS1;PAM;BET1;IGF2R;AP3B1;STX12;ADAM10;GALC;GOSR2;ARFGAP3;SNAP23;ATP7A;COG2;ZW10;VAMP4;ARFIP1;VPS45;GBF1;TMED10;COPB1;DOP1A;GOLGA4;RAB5A;MON2;AP1G1;AP2B1;USO1;TSG101;ARFGEF1;SEC31A;RAB2A;VPS4B;DNM1L;CLTC;KIF1B;MAPK1;SEC22B;ATP6V1H;NAPG;COPB2;STX16;RAB22A;OCRL;RAB9A;CLCN3;YIPF6;TMX1;ARCN1;SNX2;STX7;STAM;CLN5;LMAN1;SCAMP3;GNAS;M6PR;BNIP3;NA…	vascular
454	GO_Biological_Process_2023__Embryonic Digestive Tract Development (GO:0048566)	-0.465759	-1.92066	0.00573888	0.026854	1	11/18	21.96%	RARRES2;PDGFRA;SOX11;SIX2;FGFR2;PCSK5;SALL1;RBPMS2;STRA6;PKDCC;ID2	vascular
455	GO_Biological_Process_2023__Regulation Of Protein Deacetylation (GO:0090311)	0.376671	1.91928	0	0.0722723	0.985	18/18	62.37%	NNMT;TADA2A;MBIP;EP300;YEATS2;DYRK1A;ZZZ3;SPRED2;KAT2B;WDR5;CCAR2;DR1;SGF29;KAT14;SPRED1;KAT2A;TADA3;IFNG	vascular
456	GO_Biological_Process_2023__Transport Across Blood-Brain Barrier (GO:0150104)	-0.280677	-1.91895	0.0047619	0.027128	1	48/83	33.92%	AVPR1A;ABCC9;SLC19A1;KCNJ8;SLC22A3;SLC6A13;SLC24A3;SLC6A1;FABP5;SLC6A17;ATP1A2;SLC1A3;SLC38A5;SLCO1C1;SLC4A8;SLC8A2;ATP1A4;SLC2A4;SLC38A1;ATP1B2;LRP1;SLC4A3;SLC16A7;SLC5A6;SLC5A1;SLC7A8;ATP2A3;SLC28A2;SLC6A9;CD36;SLC38A3;SLC6A6;ABCG2;SLC29A2;LRP2;SLC5A3;SLC29A1;LRP3;SLC7A3;TFRC;MFSD2A;SLC1A4;SLC29A4;SLC4A4;SLC13A3;SLC22A5;SLC1A2;SLC22A8	vascular
457	GO_Biological_Process_2023__Regulation Of Monoatomic Ion Transmembrane Transport (GO:0034765)	-0.395476	-1.91807	0.00533333	0.0272574	1	18/28	32.07%	KCNJ4;KCNJ11;KCNJ8;GRIN1;KCNJ9;KCNJ6;KCNJ12;GRIN2C;GRIN2B;GRIN2A;KCNJ3;KCNJ16;GRIN2D;P2RX7;KCNJ13;CALHM1;KCNJ15;KCNJ10	vascular
458	GO_Biological_Process_2023__Substantia Nigra Development (GO:0021762)	-0.352586	-1.91704	0.00266312	0.0274057	1	15/39	15.38%	PLP1;INA;SYPL2;CALM3;FGF9;PADI2;DYNLL1;SYNGR3;CALM1;CALM2;COX6B1;NDUFS3;BASP1;ATP5PF;YWHAH	vascular
459	KEGG_2021_Human__ECM-receptor interaction	-0.283888	-1.91366	0	0.0280348	1	41/79	29.14%	THBS2;ITGA11;COL4A4;COL4A3;ITGA7;COL6A3;THBS1;SPP1;COL1A2;LAMC3;CD44;COL6A2;FREM1;COL9A1;COL6A1;TNC;COL9A2;COL1A1;SV2B;ITGA4;COL4A5;SV2A;LAMA2;FREM2;LAMA1;TNR;COL9A3;ITGB8;NPNT;SDC1;COL2A1;SV2C;CD36;TNN;COL4A6;LAMA3;THBS4;AGRN;VTN;RELN;ITGA10	vascular
460	GO_Biological_Process_2023__Myelination (GO:0042552)	-0.333475	-1.91304	0.00636943	0.0280895	1	26/47	30.45%	PLP1;KLK6;TPPP;MAL2;MARVELD1;SOX10;MYRF;ABCD2;HES5;CNTNAP1;MAL;MPZ;TNFRSF21;EPB41L3;GPM6B;GPC1;NFASC;SCN8A;SLC8A3;ACSBG1;B4GALT6;BCAS1;AMIGO1;PLLP;GAL3ST1;LGI4	vascular
461	GO_Molecular_Function_2023__Methylated Histone Binding (GO:0035064)	0.217521	1.91007	0	0.0759891	0.988	62/68	64.57%	RAG2;UHRF1;ZMYND8;KDM8;SPIN2B;MSL3;MORC4;NCAPG2;TAF1;CDYL;MPHOSPH8;ZZEF1;PHF8;MBTD1;TP53BP1;CHD1;MORC3;TDRD3;KMT2E;CHD8;SUZ12;ZMYND11;GLYR1;MTF2;BPTF;FMR1;TRIM24;ZZZ3;KDM5A;SPIN1;PWWP2A;NCAPD3;ING3;MSH6;CBX5;WDR5;L3MBTL2;ING5;DPF2;SGF29;PHF13;ING4;TAF7;CBX6;CBX3;ING1;SPIN3;PHF19;RRP8;L3MBTL1;CBX1;KDM7A;PHF1;PYGO1;CXXC1;ZCWPW1;LRWD1;HDGFL2;SPIN2A;ZCWPW2;SPIN4;TTLL12	vascular
462	WikiPathway_2023_Human__TNF Alpha Signaling Pathway WP231	0.20082	1.90969	0	0.0755503	0.989	52/88	33.92%	MAP3K8;PYGL;NFKBIE;NOX1;TRAF1;SMPD2;PLK1;CASP8;TNFAIP3;TRADD;CFLAR;DIABLO;BIRC3;CASP9;MAP3K5;KSR1;MAP2K3;IKBKB;NFKBIB;RFFL;TNFRSF1A;TRAF2;CASP7;MAP3K14;NFKB2;TNFRSF1B;TAB1;CASP3;TANK;MAP3K3;REL;SOS1;RIPK1;OTUD7B;TRAP1;TAB3;BIRC2;BCL2L1;TBK1;NSMAF;MAP3K7;MAPK8;NFKB1;APAF1;CUL1;TAB2;FBXW11;MAP2K4;CSNK2A1;RAF1;CREBBP;BTRC	vascular
463	GO_Biological_Process_2023__Myoblast Fusion (GO:0007520)	-0.473092	-1.90889	0.00583942	0.0290336	1	13/16	38.87%	DOCK2;ADAMTS5;ADAMTS15;DOCK5;CACNA1H;ADGRB3;NOS1;KCNH1;PTGFRN;CD81;CD9;ERVFRD-1;ERVW-1	vascular
464	GO_Biological_Process_2023__Regulation Of Lipid Storage (GO:0010883)	0.365344	1.90867	0.00986842	0.0753766	0.99	8/20	10.07%	IL6;HILPDA;IKBKE;PLIN5;ITGB3;PLA2G10;ITGAV;PPARG	vascular
465	KEGG_2021_Human__GnRH secretion	-0.302487	-1.90862	0.00123762	0.0290294	1	27/61	24.48%	KCNJ11;SPP1;PIK3CD;CACNA1G;TRPC4;KCNJ9;HCN3;GABBR1;PRKCG;GABBR2;CACNA1S;CACNA1H;KCNJ6;CACNA1F;HCN1;HCN2;KCNN1;CACNA1I;PLCB2;KCNJ3;GPER1;ARRB1;TRPC5;CACNA1D;HRAS;PIK3R2;ITPR1	vascular
466	GO_Biological_Process_2023__Calcium Ion Transmembrane Transport (GO:0070588)	-0.277048	-1.90726	0.00720288	0.0292862	1	46/80	39.79%	TRPA1;TRPC3;SLC24A3;CACNA1G;TRPC4;ATP2B3;GRIN1;SLC8A2;NALCN;CACNA1S;TRPV6;RYR3;GRIN2C;CACNB1;SMDT1;TRPV3;TRPC6;MCOLN3;CACNA2D4;SLC24A2;TRPM5;TRPM3;GRIN2B;SLC8A1;SLC8A3;GRIN2A;SLC24A4;TRPM2;TRPC5;ATP2A3;CACNA1D;ATP2C2;TRPV2;GRIN2D;P2RX7;CACNG1;ORAI1;CACNA1A;CACNA2D1;MCOLN2;FKBP1A;ATP2A1;ATP2B1;GHITM;MCOLN1;TRPV1	vascular
467	KEGG_2021_Human__Gastric acid secretion	-0.294304	-1.90423	0.00119048	0.0298647	1	32/70	24.53%	SST;ATP1A3;ATP1B1;ADCY5;CALM3;ATP1A2;HRH2;CCKBR;SSTR2;MYLK2;CALML4;ATP1A4;PRKCG;KCNK2;CALM1;CAMK2A;ADCY1;ATP1B2;CALM2;CAMK2B;GNAI1;CFTR;ADCY8;KCNK10;PLCB2;MYLK;ADCY7;KCNJ16;CA2;ACTG1;ITPR1;ACTB	vascular
468	GO_Biological_Process_2023__Regulation Of Release Of Sequestered Calcium Ion Into Cytosol (GO:0051279)	-0.323602	-1.9003	0.0012987	0.0306803	1	20/47	18.43%	THY1;CASQ1;JPH4;CALM3;NPSR1;CASQ2;DRD1;HRC;FKBP1B;CXCL10;DMD;CALM1;CALM2;CXCL11;JPH3;ANK2;SNCA;JSRP1;NOS1;GPER1	vascular
469	GO_Biological_Process_2023__Recombinational Repair (GO:0000725)	0.197725	1.90008	0	0.0777701	0.995	72/94	50.09%	BRCA2;TONSL;RPA4;POLN;MCM8;RAD51;NABP1;EID3;RECQL5;SWSAP1;ZMYND8;KDM4D;SAMHD1;PALB2;RAD51B;POLL;SPIDR;MCM9;RAD51D;AP5Z1;INTS3;NPC1;RFWD3;ERCC5;RNF169;RAD52;REV3L;SLF1;RMI1;HELQ;RNF138;SMC5;EXD2;RBBP8;RECQL;MMS22L;INO80;EPC1;WRN;MBTD1;NSMCE2;MRE11;SMC6;FBH1;XRCC5;WDR48;SFPQ;PSMD14;ZFYVE26;YY1;SLF2;ERCC4;RPA1;NSMCE4A;TOP3A;NBN;XRCC6;RAD51C;HUS1;SWI5;RPA2;SEM1;NSMCE1;GEN1;ZSWIM7;LIG3;CHD4;BRCA1;PPP4…	vascular
470	WikiPathway_2023_Human__Hippocampal Synaptogenesis And Neurogenesis WP5231	-0.417636	-1.89967	0.00143678	0.0307363	1	14/23	30.16%	BCL2;DRD1;SYT12;CALM1;CAMK2A;CAMK2B;CAMK4;NCAM1;DIO2;CCND2;SYT2;CAMKK1;BDNF;NRXN1	vascular
471	GO_Cellular_Component_2023__Gap Junction (GO:0005921)	-0.484442	-1.89931	0.0060698	0.0307394	1	9/15	20.78%	GJC1;GJB1;GJA4;GJC3;GJD2;GJA5;GJB2;GJD3;GJC2	vascular
472	GO_Molecular_Function_2023__Monoatomic Ion Gated Channel Activity (GO:0022839)	-0.353541	-1.8989	0.00134771	0.0307639	1	24/38	34.91%	KCNA3;TMC8;GRIN1;TMC4;PKD2L1;CACNA1H;CHRNA4;CHRNB2;KCNT1;TMC3;TRPM5;PIEZO2;TMEM63C;CHRNB4;TMC2;ZACN;KCNK15;CHRNB1;GABRB1;CHRNA5;CALHM1;TMC7;ANXA6;CNGA3	vascular
473	GO_Biological_Process_2023__Protein Polyubiquitination (GO:0000209)	0.157697	1.89804	0	0.0780082	0.995	181/214	60.64%	RNF144B;TRIM71;PELI2;TRIM5;NHLRC1;TRAF1;RNF217;NEDD4;TRIM22;TNFSF13B;TNFAIP3;TRIM32;PELI1;RNF19A;RNF19B;TRAF3IP2;UBOX5;ZNRF1;RFFL;RNF115;DDB2;UBE2J1;TRIM38;UBE3D;TRAF2;CTNNB1;LRSAM1;TRIM25;THOP1;KLHL20;FBXL7;MARCHF8;TRIM27;TRIM3;RNF216;MDM2;TRIM56;TRAF5;UBE2V1;BARD1;RNF4;TAF1;TRAF6;CBFB;UBE2J2;RNF168;PPIL2;RNF213;ZNF738;SMURF1;FBXO38;WSB1;NT5C2;MARCHF5;SASH1;BIRC2;RNF185;UBE4B;ANAPC1;ZNRF2;ANAPC4…	vascular
474	WikiPathway_2023_Human__Iron Metabolism Disorders WP5172	-0.46283	-1.89739	0.00719424	0.0310688	1	13/17	33.53%	FTH1;TF;STEAP3;UQCRFS1;FTL;TFR2;HAMP;SLC40A1;HJV;TFRC;HEPH;CYBRD1;BCS1L	vascular
475	GO_Biological_Process_2023__Negative Regulation Of Peptide Hormone Secretion (GO:0090278)	-0.443904	-1.89723	0.00571429	0.0310116	1	10/18	21.05%	CRH;CHGA;CRHBP;KCNJ11;SFRP1;KCNB1;IRS1;BMP8A;CCN3;FFAR4	vascular
476	GO_Biological_Process_2023__Regulation Of Activated T Cell Proliferation (GO:0046006)	-0.377706	-1.89527	0.00134048	0.0314986	1	19/30	33.22%	IGF1;IGF2;IGFBP2;CD24;CRTAM;TNFSF9;PYCARD;HHLA2;IL12RB1;IL18;RIPK3;RPS3;ICOSLG;LILRB4;IL23R;PRNP;FADD;TMIGD2;IL23A	vascular
477	GO_Molecular_Function_2023__Inward Rectifier Potassium Channel Activity (GO:0005242)	-0.403227	-1.89512	0.00713267	0.0314476	1	17/25	32.07%	KCNJ4;ABCC9;KCNK1;KCNJ11;KCNJ8;KCNJ9;KCNJ6;KCNH2;KCNJ12;KCNN1;KCNH6;KCNH7;KCNJ3;KCNJ16;KCNJ13;KCNJ15;KCNJ10	vascular
478	GO_Molecular_Function_2023__Chemorepellent Activity (GO:0045499)	-0.408419	-1.8941	0.00411523	0.0316439	1	13/24	18.80%	DPP4;SEMA3D;SEMA3C;SEMA5A;SEMA4D;SEMA3G;SEMA6D;NRG3;SEMA5B;SEMA3A;SEMA7A;NRG1;SEMA3E	vascular
479	GO_Biological_Process_2023__Neuron Development (GO:0048666)	-0.246338	-1.88946	0.00111607	0.0327324	1	66/146	31.69%	STMN1;STMN4;L1CAM;STMN2;CDK5R1;RUNX3;NPY;CNTN4;CDK5;TMEM108;RASGRF1;GPM6A;MAPT;GPRIN3;DMD;INSM1;UNC5A;TENM4;NLGN1;WNT5A;VSX1;ETV1;MANF;ASCL1;APOE;BLOC1S1;SAMD14;MYT1L;LGI1;SLC44A4;EPHA5;STMN3;FLRT3;TENM3;PQBP1;TENM1;GPRIN2;RAB6B;SH3GL2;B4GALT6;ADGRF1;RP1;NTRK2;NCDN;GPRIN1;PBX4;ADCYAP1;ATCAY;TENM2;ALK;ATP8A2;ROBO2;PRMT1;BLOC1S3;PRDM12;MAP1B;SRRM4;RAB13;CNTNAP2;NRTN;PPP1R9A;BTG2;LGI4;BICDL1;BLOC1S2…	vascular
480	KEGG_2021_Human__Huntington disease	-0.217356	-1.88878	0	0.0327416	1	129/285	34.43%	TUBB2A;DNAL4;TUBB4A;NDUFA4L2;COX4I2;STX1A;ATP5MC1;ATP5PO;NDUFA4;SLC1A3;ATP5F1D;DCTN3;GRIN1;NDUFS5;ATP5MC3;NDUFC2;GRIA4;POLR2I;CYC1;TUBA1A;MAPK10;UQCRH;NDUFB10;NDUFS7;NDUFB8;COX8A;NDUFB7;NDUFB5;TAF4B;POLR2K;NDUFA1;COX5A;SLC25A4;SDHD;SLC25A5;PSMB6;COX6B1;COX7C;NDUFB11;NDUFA8;COX6A1;COX5B;UQCR10;COX4I1;CYCS;COX7A2;NDUFS3;KIF5C;NDUFA13;PSMD8;POLR2L;CREB3L1;UQCRB;COX7B;NDUFB2;TUBA8;POLR2J;UQCRQ;NDUFAB…	vascular
481	WikiPathway_2023_Human__Blood Clotting Cascade WP272	0.420539	1.88846	0.00934579	0.0800926	0.997	8/15	10.38%	VWF;SERPINE1;SERPINF2;F5;F3;F11;PLAT;F8	vascular
482	GO_Biological_Process_2023__Positive Regulation Of G Protein-Coupled Receptor Signaling Pathway (GO:0045745)	-0.446557	-1.88818	0.00578871	0.0328043	1	16/18	46.77%	GRP;CHGA;KLK6;C3;MRAP2;KLK5;GPER1;NECAB2;GSK3A;LRPAP1;SLC39A14;PHB1;PDE6G;PDE6H;PRMT5;F2	vascular
483	GO_Biological_Process_2023__Positive Regulation Of Monoatomic Ion Transport (GO:0043270)	-0.351661	-1.88812	0.00404313	0.0327344	1	24/37	37.37%	CACNB2;CHRM1;DRD1;ADRA2A;SCN4B;CCL4;CCL5;CAMK2A;SCN3B;PKP2;ANK3;ANK2;TRPC6;SCN1B;MYLK;CACNA1D;P2RX7;CCL3;ORAI1;CCR1;GPD1L;WNK3;LILRA2;ATP2B1	vascular
484	GO_Biological_Process_2023__Regulation Of Calcium Ion Transport (GO:0051924)	-0.307708	-1.8864	0.00509554	0.0331068	1	39/56	44.32%	CASQ1;SLN;BCL2;CACNB2;HRC;LILRB1;CCL4;CCL5;CD4;PACSIN3;CAMK2A;CAMK2B;PLN;ANK2;GRAMD2A;TRPC6;NOS1;MYLK;PLPP4;CACNA1D;IL16;CD84;HOMER3;CCL3;CD33;CASR;ORAI1;LILRB2;CACNA2D1;CCR1;SRI;WNK3;LILRA2;ATP2B1;HOMER1;EFHB;FFAR1;FCRL3;CAMK2G	vascular
485	GO_Biological_Process_2023__Regulation Of Type II Interferon Production (GO:0032649)	-0.280376	-1.88518	0.00844391	0.0333918	1	46/77	36.25%	LILRB1;CLEC7A;RASGRP1;ISG15;SIRPA;DDIT3;CRTAM;LAPTM5;CD14;INHBA;PYCARD;IL1B;INHA;NR1H4;SLAMF1;ZC3H12A;IL12RB1;IL18;CD276;CR1;IRGM;RIPK3;ZFPM1;C1QBP;HLA-A;IL12RB2;MYDGF;TNFSF4;LILRB4;SLAMF6;TLR7;IL23R;TLR4;VSIR;PTPN22;PRNP;F2RL1;FADD;IL23A;CCR2;CCR7;ZP3;PDE4B;RARA;FZD5;TLR3	vascular
486	GO_Biological_Process_2023__Calcium Ion Homeostasis (GO:0055074)	-0.269894	-1.87959	0.007109	0.0346612	1	48/90	34.03%	TRPA1;PTH1R;HTR2A;EDNRA;EDN3;ATP1B1;SLC24A3;CASQ2;GRIN1;CCL5;SLC8A2;FAM20A;TRPV6;HTR2C;PLN;ANK2;CXCL12;SNCA;SLC24A2;TMEM203;DRD5;ATP13A5;TPT1;RYR2;SLC8A1;SLC8A3;SLC24A4;STOML2;HTR2B;CHRNA7;ATP2A3;DRD4;ATP13A4;ATP2C2;S100A14;ATP13A1;SLC30A1;GCM2;CALR;ZNHIT1;CIB3;CCL3;TNNI3;CASR;TRDN;CCR2;CIB2;CCR1	vascular
487	GO_Biological_Process_2023__Inorganic Cation Import Across Plasma Membrane (GO:0098659)	-0.265152	-1.87814	0.00230415	0.0349847	1	44/101	23.58%	KCNJ4;ABCC9;ATP1A3;KCNJ11;KCNJ8;ATP1B1;SLC6A1;ATP1A2;CACNA1G;SCN7A;KCNJ9;SLC8A2;ATP1A4;SCN1A;CACNA1S;TRPV6;SLC12A5;ATP1B2;CACNA1H;KCNJ6;KCNK9;KCNH2;KCNJ12;CACNA1E;CACNA1F;TRPV3;HCN2;SCN9A;SLC24A2;SLC12A7;CACNA1I;FXYD2;SCNN1D;SCN8A;SLC8A1;SLC8A3;SLC24A4;KCNJ3;SLC5A1;SLC12A1;CACNA1D;KCNJ16;CACNA1B;TRPV2	vascular
488	GO_Biological_Process_2023__Synaptic Vesicle Endocytosis (GO:0048488)	-0.346853	-1.87666	0.00762389	0.0352473	1	17/39	19.83%	SNCB;STX1A;SYT5;CDK5;SH3GL3;NLGN4Y;PACSIN1;DNM1;SNCG;VAMP2;SYT1;NLGN1;SNAP91;SNCA;NLGN4X;SH3GL2;NLGN3	vascular
489	GO_Biological_Process_2023__Proton Transmembrane Transport (GO:1902600)	-0.327972	-1.87561	0.00666667	0.0354131	1	29/44	43.62%	NOX5;ATP1A3;SLC4A11;ATP5PO;ATP1B1;ATP1A2;ATP6V1F;ATP1A4;ATP6V0B;SLC46A1;ATP5MF;ATP6V0A4;FXYD2;ATP6AP1;SLC36A3;ATP6V0E2;ATP5F1B;ATP6V0C;ATP6AP2;UCP3;OTOP3;UCP2;ATP6V0D1;TMEM175;SLC9A1;ATP6V1D;SLC36A1;ATP6V1B2;HVCN1	vascular
490	GO_Biological_Process_2023__Myofibril Assembly (GO:0030239)	-0.336764	-1.87553	0.00384615	0.0353471	1	28/42	38.28%	CASQ1;PDGFRB;PDGFRA;MYL9;TMOD1;ACTN2;TNNT1;LMOD3;KRT19;SYNPO2L;MYOM2;LMOD1;FHOD3;KLHL41;CSRP2;TTN;ADPRHL1;TNNT2;CAPN3;FLNC;TNNT3;CSRP1;PGM5;LMOD2;MYLK3;MYH7;TMOD2;MYOZ2	vascular
491	GO_Biological_Process_2023__Sensory Perception Of Pain (GO:0019233)	-0.449304	-1.87484	0.00422535	0.0354034	1	12/18	28.26%	TRPA1;MME;CCL2;CHRNA4;RETREG1;SCN9A;KCNA2;CHRNB2;PTGES;OPRM1;P2RX7;PRDM12	vascular
492	GO_Biological_Process_2023__Regulation Of Calcium-Mediated Signaling (GO:0050848)	-0.387769	-1.87342	0.00405954	0.0357027	1	17/28	29.92%	P2RX5;P2RX3;CD22;CCL4;CLEC7A;SLC8A2;MAPT;NEUROD2;CALM2;PLEK;CMKLR1;SLC24A4;CDH13;RIT2;ITPR1;CCL3;TRAT1	vascular
493	GO_Biological_Process_2023__Calcium Ion Import Across Plasma Membrane (GO:0098703)	-0.353597	-1.87242	0.00524246	0.0358567	1	20/37	23.58%	CACNA1G;SCN7A;SLC8A2;SCN1A;CACNA1S;TRPV6;CACNA1H;CACNA1E;CACNA1F;TRPV3;SCN9A;SLC24A2;CACNA1I;SCN8A;SLC8A1;SLC8A3;SLC24A4;CACNA1D;CACNA1B;TRPV2	vascular
494	GO_Biological_Process_2023__Calcium Ion Transmembrane Import Into Cytosol (GO:0097553)	-0.277595	-1.87072	0.00472255	0.0362227	1	55/78	46.54%	PLCE1;HTR2A;PTPRC;JPH4;CACNA1G;SCN7A;GRIN1;SLC8A2;SCN1A;CACNA1S;TRPV6;CACNA1H;PLCH1;HTR2C;JPH3;GRIN2C;CACNA1E;CACNA1F;TRPV3;SCN9A;SLC24A2;CACNA1I;PLCB2;GRIN2B;SCN8A;RYR2;SLC8A1;SLC8A3;GRIN2A;SLC24A4;HTR2B;CACNA1D;CACNA1B;TRPV2;ITPR1;GRIN2D;PLCH2;JPH1;CACNA1A;RYR1;CACNA2D1;LCK;CCR7;SCN3A;FLNA;TRPV1;SCN2A;PLCB4;GP1BA;CACNB3;CLU;CCL19;SCN11A;SCN10A;PLCB3	vascular
495	GO_Molecular_Function_2023__Cytokine Activity (GO:0005125)	-0.249957	-1.86943	0.00116686	0.0365287	1	70/114	39.12%	ENC1;NDP;BMP2;WNT16;WNT6;CCL4;CCL26;CCL5;IL33;IL17D;LIF;GDF7;CCL2;WNT7A;WNT10B;CXCL10;NODAL;IL34;WNT10A;SCGB3A1;BMP4;CXCL11;WNT5A;WNT2;INHBA;CXCL12;BMP8A;IL1B;INHA;TIMP1;IL18;IL5;EPO;WNT3;GDF6;WNT4;CCL24;NRG1;TSLP;BMP8B;FAM3B;GDF15;CXCL16;IL16;GDF9;WNT11;CCL20;INHBC;BMP3;VEGFA;KITLG;WNT5B;BMP7;CCL3;CX3CL1;GDF10;GDF11;TGFB3;CRLF1;CLCF1;IL10;TNFSF11;IFNK;IL7;IFNG;IL26;MSTN;WNT8A;IL11;CXCL6	vascular
496	GO_Biological_Process_2023__Regulation Of Protein-Containing Complex Disassembly (GO:0043244)	0.373537	1.86814	0.00946372	0.0856753	0.999	17/19	47.94%	IRAK3;IGF1R;CLN3;GBA1;INSR;MTRF1;CLEC16A;ETF1;GSPT1;ATG5;UPF1;OGFOD1;BNIP3;SHFL;TECPR1;TBC1D25;HDAC6	vascular
497	GO_Biological_Process_2023__Regulation Of T Cell Activation (GO:0050863)	-0.300895	-1.86807	0.00254453	0.0368466	1	33/57	34.00%	THY1;PAG1;FCHO1;SIRPG;CCL5;GPNMB;CD4;SIRPA;CCL2;CRTAM;LAX1;LAPTM5;ILDR2;TNFSF9;B2M;PRELID1;PYCARD;SIRPB1;GNAO1;SPINK5;TBX21;IL4I1;TNFAIP8L2;FGL1;HLA-DRA;MYDGF;HLA-DMB;HLA-DQA1;PTPN22;HLA-DOB;CCR2;TNFSF11;LCK	vascular
498	GO_Biological_Process_2023__Potassium Ion Homeostasis (GO:0055075)	-0.413809	-1.86676	0.00821918	0.0371249	1	11/21	20.21%	ATP1A3;ATP1B1;ATP1A2;ATP1A4;SLC12A5;ATP1B2;KCNH2;SLC12A7;FXYD2;KCNMA1;SLC12A1	vascular
499	KEGG_2021_Human__Vascular smooth muscle contraction	-0.25409	-1.8667	0.0045977	0.0370492	1	46/118	23.18%	AVPR1A;EDNRA;EDN3;ADORA2B;GUCY1B1;ADCY5;CALM3;PRKG1;RAMP2;NPPA;AGTR1;GUCY1A2;MYL9;MYLK2;CALML4;GUCY1A1;ACTG2;PRKCG;IRAG1;ADRA1A;CALM1;CACNA1S;ADCY1;CALM2;RAMP1;ADORA2A;ADRA1B;PPP1R14A;KCNMB1;CACNA1F;MYH11;NPPC;ADCY8;PLA2G5;MYL6;KCNMB2;PLCB2;ADM;KCNMA1;CALD1;MYLK;CACNA1D;ADCY7;JMJD7-PLA2G4B;KCNU1;MYL6B	vascular
500	GO_Biological_Process_2023__Regulation Of T Cell Mediated Cytotoxicity (GO:0001914)	-0.372459	-1.86637	0.00277008	0.0370491	1	19/29	33.22%	PTPRC;KLRC1;LILRB1;HLA-G;RAET1G;HLA-C;ULBP2;IL12RB1;CD1D;HLA-B;RIPK3;HLA-A;ULBP3;HLA-DRA;HLA-E;IL23R;HLA-F;FADD;IL23A	vascular
501	GO_Biological_Process_2023__Mesenchymal Cell Migration (GO:0090497)	-0.364876	-1.86536	0.00789474	0.0372388	1	20/32	31.53%	SEMA3D;SEMA3C;SEMA5A;SEMA4D;RADIL;SEMA3G;SOX10;SEMA6D;SEMA5B;ERBB4;SEMA3A;SEMA7A;NELL1;HTR2B;SEMA3E;SHH;SOX8;NRTN;SEMA3B;SEMA4A	vascular
502	GO_Biological_Process_2023__tRNA Aminoacylation (GO:0043039)	0.343853	1.86185	0	0.0879118	1	21/22	58.44%	MARS2;YARS2;WARS2;HARS2;DARS2;LARS2;IARS1;QRSL1;RARS2;FARS2;LARS1;HARS1;RARS1;EPRS1;IARS2;GARS1;MARS1;GATB;QARS1;GATC;NARS1	vascular
503	GO_Biological_Process_2023__Response To Transforming Growth Factor Beta (GO:0071559)	-0.347653	-1.86031	0.00402685	0.0387348	1	14/36	17.50%	DLX1;FNDC4;PDE3A;MXRA5;RUNX3;SFRP1;CLEC3B;WNT7A;WNT10A;WNT5A;WNT2;HYAL2;SOX6;WNT4	vascular
504	GO_Biological_Process_2023__Positive Regulation Of Chemotaxis (GO:0050921)	-0.332308	-1.85947	0.00510856	0.0388005	1	20/41	24.15%	SMOC2;P2RY12;PDGFRB;EDN3;THBS1;RARRES2;NTRK3;PTN;SEMA5A;TMSB4X;CCL26;MET;CNTN1;F7;AIF1;NELL1;CDH13;HSPB1;MDK;DSCAM	vascular
505	GO_Cellular_Component_2023__GABA-A Receptor Complex (GO:1902711)	-0.447313	-1.85875	0.00436047	0.0388328	1	12/18	26.00%	GABRD;GABRA5;GABRE;GABRG2;GABRA4;GABRB2;GABRQ;GABRA6;GABRG3;GABRB3;GABRB1;GABRG1	vascular
506	GO_Molecular_Function_2023__GABA-A Receptor Activity (GO:0004890)	-0.447313	-1.85875	0.00436047	0.0388328	1	12/18	26.00%	GABRD;GABRA5;GABRE;GABRG2;GABRA4;GABRB2;GABRQ;GABRA6;GABRG3;GABRB3;GABRB1;GABRG1	vascular
507	WikiPathway_2023_Human__Burn Wound Healing WP5055	-0.287374	-1.85525	0.00489596	0.0398039	1	28/68	19.41%	KRT222;SNAI2;PDGFRB;DCN;COL1A2;BCL2;ACTA1;LGALS1;TAGLN;TNC;COL1A1;CCL2;FGFR2;F13A1;HGF;KLF4;INHBA;ELN;S100A6;CXCL12;IL1B;SFRP2;TIMP1;TPT1;S100A11;BAX;FBN1;CHRNA7	vascular
508	GO_Biological_Process_2023__T Cell Activation (GO:0042110)	-0.2694	-1.85453	0.00471698	0.0399421	1	48/83	38.35%	ZAP70;PIK3CG;PTPRC;CD86;SOX4;PIK3CD;CD8A;CD44;DPP4;CLEC7A;RASGRP1;CD4;CXADR;CRTAM;RHOH;KIT;DLL4;CD28;CD276;JAML;CD74;CD8B;ICOSLG;GATA3;LFNG;CD84;CEACAM21;PIK3R2;MDK;TNFSF4;JAG2;NLRC3;SLAMF6;ITK;LCP1;PTPN22;F2RL1;CD247;CD7;CD3E;LCK;CCR7;IFNK;SLAMF7;FKBP1A;LY9;FOXP3;NHEJ1	vascular
509	WikiPathway_2023_Human__Development Of Ureteric Collection System WP5053	-0.302147	-1.85385	0.00855746	0.0400688	1	32/57	31.22%	EYA1;SIX1;BMP2;FREM1;SIX2;FGFR2;BMPR1A;SLIT2;BMP4;ROBO1;FREM2;SALL1;MYCN;PAX2;ANOS1;CELSR1;GFRA1;GRIP1;CCND1;GLI1;SMO;GREB1L;GPC3;GATA3;WNT11;SHH;ROBO2;BMP7;SPRY1;GDF11;FST;CTDNEP1	vascular
510	GO_Molecular_Function_2023__Calcium Ion Transmembrane Transporter Activity (GO:0015085)	-0.286246	-1.85287	0.00247831	0.0402487	1	39/66	40.35%	TRPA1;TRPC3;SLC24A3;CACNB2;TRPC4;ATP2B3;GRIN1;PKD2L1;SLC8A2;TRPV6;ATP2B2;TRPV3;TRPC6;MCOLN3;SLC24A2;TRPM3;RYR2;PKD1L2;SLC24A4;TRPM2;TRPC5;CHRNA7;ATP2A3;CACNA1D;ATP2C2;TRPV2;ITPR1;UCP3;ORAI1;RYR1;PKD2L2;MCOLN2;ANXA6;ATP2A1;ATP2B1;PANX1;MCOLN1;TRPV1;TPCN2	vascular
511	GO_Biological_Process_2023__Membrane Repolarization (GO:0086009)	-0.45554	-1.85216	0.00559441	0.040254	1	10/17	19.58%	KCNE4;ATP1B1;ATP1A2;ATP1B2;KCNH2;KCNE3;KCNH6;KCNH7;SLC24A4;KCND3	vascular
512	GO_Biological_Process_2023__Positive Regulation Of Ras Protein Signal Transduction (GO:0046579)	-0.312625	-1.85136	0.00771208	0.0404151	1	21/50	18.81%	IGF1;PIK3CG;COL3A1;GPR65;LPAR1;RASGEF1A;GPR174;RASGRP1;NTRK1;RASGRF1;GPR18;SYNPO2L;RTN4R;ROBO1;MMD2;GPR17;FGF10;LPAR4;F2RL2;EPO;ARRB1	vascular
513	KEGG_2021_Human__AGE-RAGE signaling pathway in diabetic complications	0.187324	1.85114	0	0.0904169	1	23/100	8.70%	IL6;SELE;EDN1;PIK3R3;NOX4;CXCL8;THBD;SERPINE1;MMP2;PLCD1;VCAM1;VEGFD;MAPK13;F3;MAPK11;VEGFC;PLCG2;ICAM1;NFATC1;NOS3;STAT3;NOX1;AGER	vascular
514	GO_Biological_Process_2023__Regulation Of Rac Protein Signal Transduction (GO:0035020)	-0.47928	-1.84951	0.00592593	0.0408828	1	9/15	25.39%	SH3BP1;PIK3CG;ARHGAP24;RASGRF1;ARHGAP44;CADM4;STMN3;KBTBD7;ARF6	vascular
515	GO_Biological_Process_2023__Negative Regulation Of Peptidase Activity (GO:0010466)	-0.332263	-1.84934	0.00642674	0.0408221	1	24/41	29.89%	SERPINF1;UBXN1;LRP1;CRB2;SPINK5;SPOCK1;TIMP1;SERPINI1;CSTB;NRG1;SERPINE3;SPOCK3;GAPDH;PARK7;ECM1;CST7;KNG1;SERPIND1;SPOCK2;SERPINE2;CSTA;VTN;CST3;TIMP4	vascular
516	GO_Biological_Process_2023__Presynapse Assembly (GO:0099054)	-0.47804	-1.84928	0.00294551	0.0407468	1	10/15	24.75%	NLGN4Y;IL1RAPL1;WNT7A;NLGN1;WNT5A;NLGN4X;PTPRD;NLGN3;LRP4;PCLO	vascular
517	WikiPathway_2023_Human__GPCRs Class B Secretin Like WP334	-0.410824	-1.84848	0.00580552	0.0408923	1	16/22	34.52%	PTH1R;ADCYAP1R1;ADGRE2;GHRHR;GIPR;VIPR2;LINC02210-CRHR1;VIPR1;ADGRE5;GLP1R;GLP2R;CRHR2;ADGRG2;CALCR;ADGRE1;ADGRL3	vascular
518	GO_Biological_Process_2023__Regulation Of Osteoblast Differentiation (GO:0045667)	-0.270432	-1.84834	0.00612745	0.0408426	1	40/84	29.47%	IGF1;LTF;TP63;SNAI2;CCN4;SOX11;NOG;BMPR1B;SEMA4D;RUNX2;RANBP3L;FGFR2;TNFAIP6;BMPR1A;BMP4;HGF;GREM1;BAMBI;HEMGN;NPNT;WNT4;DNAI3;NELL1;FBN2;IFITM1;SMOC1;FFAR4;RORB;DDR2;TNN;TMEM119;TWIST1;CHRD;HDAC9;LRP3;SOX9;BMP7;SCUBE3;ATRAID;GDF10	vascular
519	GO_Biological_Process_2023__Negative Regulation Of Mitochondrion Organization (GO:0010823)	-0.343315	-1.84694	0.00394737	0.0410258	1	29/37	51.45%	IGF1;TMEM14A;MAPT;FZD9;HSPA1A;SLC25A4;SLC25A5;HGF;TRIAP1;PRELID1;SLC25A31;PPIF;TFRC;SLC25A6;PSMD10;AVP;ADCK1;PINK1;IAPP;GHITM;FXN;MUL1;CLU;GPX1;FLCN;SLC35F6;AKT1;MPV17L;BAK1	vascular
520	GO_Biological_Process_2023__Lymphocyte Chemotaxis (GO:0048247)	-0.402212	-1.84595	0	0.0412133	1	21/24	48.57%	PIK3CG;PIK3CD;CCL4;CCL26;CCL5;CCL2;CXCL10;CXCL11;CYP7B1;CCL24;MSMP;CXCL16;CCL20;CCL3;CX3CL1;GPR183;HSD3B7;SLC12A2;CCL19;KLF5;GAS6	vascular
521	GO_Biological_Process_2023__Membrane Depolarization During Cardiac Muscle Cell Action Potential (GO:0086012)	-0.465018	-1.84546	0.00770416	0.0412554	1	11/16	26.21%	SCN2B;ATP1A2;CACNA1G;CACNB2;SCN4B;SCN3B;HCN2;SLC8A1;SCN1B;CACNA1D;HCN4	vascular
522	GO_Biological_Process_2023__Intracellular Calcium Ion Homeostasis (GO:0006874)	-0.24171	-1.84542	0	0.0411782	1	51/127	25.87%	TRPA1;TUNAR;PTH1R;HTR2A;EDNRA;EDN3;TRPC3;ATP1B1;SLC24A3;BCL2;CASQ2;KCTD17;HRC;TRPC4;ATP2B3;CCL5;SLC8A2;FKBP1B;FZD9;ATP2B2;HTR2C;SMDT1;PLN;ANK2;CXCL12;TRPC6;SLC24A2;TMEM203;DRD5;ATP13A5;TPT1;RYR2;SLC8A1;SLC8A3;SLC24A4;BAX;STOML2;GPER1;HTR2B;TRPM2;TRPC5;CHRNA7;ATP2A3;SELENOK;DRD4;ATP13A4;ATP2C2;ATP13A1;SLC30A1;GCM2;CALR	vascular
523	GO_Biological_Process_2023__Sphingosine Metabolic Process (GO:0006670)	0.357977	1.84435	0.00996678	0.0921026	1	11/19	23.19%	ACER2;ASAH2;SPTLC3;SGPP2;ACER1;PLPP1;GBA1;SPHK2;ACER3;NAAA;SPTLC2	vascular
524	GO_Biological_Process_2023__Nuclear-Transcribed mRNA Catabolic Process, Nonsense-Mediated Decay (GO:0000184)	0.295308	1.84392	0.00371747	0.0916196	1	27/28	64.49%	DHX34;SKIC2;SMG1;SMG5;UPF3A;SMG6;SMG9;NCBP1;UPF2;GSPT1;RC3H1;SKIC3;EIF3E;SMG7;PYM1;MAGOH;UPF3B;UPF1;RNPS1;SKIC8;MAGOHB;SMG8;RBM8A;NCBP2;EIF4A3;PNRC2;PNRC1	vascular
525	GO_Biological_Process_2023__Positive Regulation Of Developmental Growth (GO:0048639)	-0.327621	-1.84259	0.00869565	0.0419224	1	21/43	26.94%	SYT4;L1CAM;CPNE6;RASAL1;SEMA4D;MAPT;NTN1;SYT1;SHTN1;GHRHR;ISLR2;CPNE9;SEMA7A;SYT17;SYT3;TWF2;SYT2;PPIB;RIMS1;BDNF;AGRN	vascular
526	GO_Biological_Process_2023__Import Into Nucleus (GO:0051170)	0.206041	1.84197	0.00537634	0.0904233	1	59/71	54.85%	GCKR;E2F3;BCL3;STAT3;IPO4;KPNA7;BACH2;PTTG1IP;RANBP17;FAM53A;NUP98;STK3;IPO11;NUP88;NUP93;NUP85;NUP107;POM121C;NUP214;FAM53C;STK4;NUP155;KPNA3;NUP133;IPO7;TNPO1;NUP153;TPR;KPNA1;KPNA6;TNPO3;KPNA4;IPO9;EIF4ENIF1;CSE1L;IPO8;KPNB1;POM121;APPL1;NUP50;HIKESHI;SEC13;IPO5;KPNA5;TNPO2;HEATR3;NUP188;TSC2;PPP1R10;RANBP6;CDAN1;RPAIN;HTATIP2;AKT1;IPO13;FAM53B;HNRNPA1;APLP2;NUP62	vascular
527	GO_Biological_Process_2023__Retina Homeostasis (GO:0001895)	-0.393325	-1.84184	0.00275482	0.0420644	1	17/25	35.03%	LTF;ATP1B2;LCN1;B2M;CRB2;CDH3;WHRN;SOD1;TULP1;RPE65;HSPB1;SLC28A2;AZGP1;ACTG1;PRDX1;KRT1;JCHAIN	vascular
528	GO_Biological_Process_2023__Regulation Of Delayed Rectifier Potassium Channel Activity (GO:1902259)	-0.461076	-1.84101	0.00985915	0.042216	1	8/16	12.36%	KCNG1;KCNS1;KCNE4;NPPA;KCNAB1;VAMP2;ANK3;KCNE3	vascular
529	GO_Biological_Process_2023__Positive Regulation Of Ion Transmembrane Transporter Activity (GO:0032414)	-0.353702	-1.84008	0.00921053	0.0424641	1	13/32	14.23%	STAC;EDNRA;ATP1B1;NDUFA4;ACTN2;CCL2;DMD;ATP1B2;WNK2;ANK3;ANK2;TRPC6;CFTR	vascular
530	GO_Molecular_Function_2023__K63-linked Polyubiquitin Modification-Dependent Protein Binding (GO:0070530)	0.332666	1.84003	0.00673401	0.0909406	1	21/23	54.95%	IKBKE;TNFAIP3;WDR81;ZRANB3;RNF169;ZBTB1;SPRTN;OTUD7B;RNF168;TAB3;UIMC1;TAB2;ZRANB1;SQSTM1;PRPF8;MINDY2;ATRIP;RNF31;IKBKG;OPTN;PARP10	vascular
531	GO_Biological_Process_2023__Cellular Response To Calcium Ion (GO:0071277)	-0.286807	-1.83997	0.00848485	0.0423186	1	38/66	37.24%	SYT4;CRHBP;SYT13;CPNE6;ITPKA;SYT5;SYT15;PRKAA2;NEUROD2;ADCY1;SYT1;NLGN1;WNT5A;RYR3;SYT9;ADCY8;SYT10;CPNE4;CPNE9;KCNH1;SYT6;RASA4;SYT17;SYT3;PPIF;CPNE7;SYT2;SYT7;ALOX5AP;CAPN3;DPEP1;CACNA1A;RYR1;RASGRP2;DMTN;GPLD1;CHP2;SMPD1	vascular
532	GO_Biological_Process_2023__Positive Regulation Of Osteoblast Differentiation (GO:0045669)	-0.327773	-1.83955	0.00655308	0.0422339	1	23/44	29.07%	IGF1;LTF;TP63;CCN4;SOX11;BMPR1B;RUNX2;BMPR1A;BMP4;HGF;NPNT;WNT4;DNAI3;NELL1;FBN2;IFITM1;FFAR4;DDR2;TMEM119;LRP3;BMP7;SCUBE3;ATRAID	vascular
533	GO_Biological_Process_2023__Regulation Of Neuron Death (GO:1901214)	-0.299504	-1.83903	0.00846433	0.0422991	1	26/58	25.98%	CHGA;SNCB;DKK1;DHCR24;FAIM2;CDK5;C1QA;GPNMB;MAPT;SNCG;GRID2;TRIM2;SORL1;ITGAM;WNT5A;UBB;TYROBP;GRM4;SNCA;ITGB2;GRIN2B;CHRNA7;PARK7;CD200;CD200R1;EGR1	vascular
534	GO_Biological_Process_2023__Extrinsic Apoptotic Signaling Pathway Via Death Domain Receptors (GO:0008625)	0.301935	1.83805	0.00393701	0.0912945	1	12/29	14.67%	TNFRSF10A;TNFRSF10C;NGF;TNFRSF10B;DDX47;CASP10;CASP8;TRADD;DAB2IP;DIABLO;SORT1;GABARAP	vascular
535	MSigDB_Hallmark_2020__UV Response Up	-0.22872	-1.83769	0	0.0426149	1	111/156	53.95%	CCK;FOSB;SLC6A12;RRAD;MAPK8IP2;OLFM1;NTRK3;BMP2;HSPA2;NPTX2;ATP6V1F;NPTXR;TACR3;CDKN2B;RASGRP1;GGH;IGFBP2;CYP1A1;APOM;SLC25A4;KCNH2;SPR;NR4A1;HYAL2;HTR7;TUBA4A;JUNB;FOS;CDKN1C;PTPRD;BSG;COL2A1;PLCL1;EPCAM;GAL;CDO1;NAT1;CA2;PPIF;DLG4;KLHDC3;RHOB;UROD;PSMC3;FEN1;FMO1;ENO2;SELENOW;CCNE1;POLE3;TFRC;HLA-F;CHRNA5;SIGMAR1;AP2S1;BTG2;CTSV;GRINA;CNP;LHX2;DNAJB1;CLTB;ALDOA;PPT1;TAP1;TCHH;PRKCD;GPX3;NFKBIA;…	vascular
536	GO_Biological_Process_2023__Positive Regulation Of Protein Serine/Threonine Kinase Activity (GO:0071902)	-0.250078	-1.83655	0.00229358	0.0427009	1	40/111	19.68%	DIRAS2;PIK3CG;CSF1R;LTF;DIRAS1;PDGFRB;EDN3;THBS1;CALM3;NTRK3;FGF1;ADRA2A;RASGRP1;SLC8A2;IL34;CD24;CALM1;CALM2;PDGFD;KIT;ROBO1;WNT5A;ADAM8;PIH1D1;SNCA;CIB1;IL1B;TDGF1;PIK3R5;CAMK1;PROX1;PIK3R6;CCND1;IRGM;TENM1;TGFA;RGCC;HTR2B;PDGFA;PSRC1	vascular
537	GO_Biological_Process_2023__Oligodendrocyte Differentiation (GO:0048709)	-0.433582	-1.83575	0.0027972	0.0428269	1	12/19	30.73%	TPPP;ZNF488;SOX10;MYRF;HES5;PRDM8;SOX6;SLC8A3;SHH;SOX8;SOX9;PTPRZ1	vascular
538	GO_Biological_Process_2023__Vascular Transport (GO:0010232)	-0.270135	-1.83531	0.00592417	0.0428636	1	46/81	33.92%	AVPR1A;ABCC9;SLC19A1;KCNJ8;SLC22A3;SLC6A13;SLC24A3;SLC6A1;SLC6A17;ATP1A2;SLC1A3;SLC38A5;SLCO1C1;SLC4A8;SLC8A2;ATP1A4;SLC2A4;SLC38A1;ATP1B2;LRP1;SLC4A3;SLC16A7;SLC5A6;SLC5A1;SLC7A8;ATP2A3;SLC28A2;SLC6A9;SLC38A3;SLC6A6;ABCG2;SLC29A2;LRP2;SLC5A3;SLC29A1;LRP3;SLC7A3;TFRC;MFSD2A;SLC1A4;SLC29A4;SLC4A4;SLC13A3;SLC22A5;SLC1A2;SLC22A8	vascular
539	GO_Biological_Process_2023__Regulation Of Cysteine-Type Endopeptidase Activity Involved In Apoptotic Process (GO:0043281)	-0.267551	-1.83472	0.00233918	0.0429465	1	43/81	36.37%	PMAIP1;SYK;CDKN2D;THBS1;CD44;NLRP2;DHCR24;CLEC7A;IFI6;TNFSF10;NODAL;BLID;DAPK1;HGF;CYCS;KLF4;NDUFA13;TRIAP1;FOXL2;PYCARD;PAX2;SNCA;AQP1;FIS1;GPER1;SOX7;SH3RF1;SOX2;VEGFA;LAMTOR5;CARD16;BAD;PDCD5;ARL6IP1;DPEP1;EPHA7;ARL6IP5;NLRP12;HTRA2;GRAMD4;BCAP31;SRC;AVP	vascular
540	GO_Molecular_Function_2023__Protein-Lysine N-methyltransferase Activity (GO:0016279)	0.242073	1.82862	0	0.0947679	1	49/53	64.65%	PRDM16;MECOM;METTL21EP;SMYD2;SETBP1;KMT5C;EZH2;DOT1L;CSKMT;METTL22;SETDB2;SETD4;ATPSCKMT;CAMKMT;NSD2;EEF1AKMT2;METTL21A;EEF1AKMT1;SETDB1;SETD7;EHMT1;SETD5;JARID2;NSD1;SETD3;ASH1L;SETD2;NSD3;KMT2C;KMT2A;KMT5B;KMT2D;EZH1;VCPKMT;KMT5A;SETD1B;SMYD5;SETD1A;EHMT2;KMT2B;SUV39H2;SETD6;FAM86B2;ETFBKMT;PRDM9;METTL21C;SETMAR;N6AMT1;SUV39H1	vascular
541	GO_Biological_Process_2023__Regulation Of Dendritic Spine Development (GO:0060998)	-0.423837	-1.82662	0.00704225	0.0452712	1	11/20	25.39%	FOXO6;NEURL1;GRIN3A;NLGN1;CAMK2B;PTPRS;SHANK1;KIF1A;CAMK1;PPFIA2;ARF6	vascular
542	GO_Biological_Process_2023__Anterior/Posterior Pattern Specification (GO:0009952)	-0.352412	-1.82647	0.00798935	0.0452381	1	23/33	41.40%	HEYL;HES4;BMP2;SIX2;DDIT3;PCSK5;CELSR2;BHLHE41;HES5;BASP1;HES1;HEY2;HES6;BHLHE40;HOXB3;ATP6AP2;HHEX;HES2;HOXB4;HEY1;WNT8A;HES7;GATA4	vascular
543	GO_Cellular_Component_2023__Cornified Envelope (GO:0001533)	-0.392939	-1.82586	0.00715308	0.0453821	1	21/25	46.53%	PKP2;KRT10;DSG2;DSG3;CNFN;JUP;SCEL;DSC2;PKP1;CSTA;PKP3;KRT1;KAZN;TCHH;PPL;FLG2;DSC1;DSP;LORICRIN;EVPL;CDSN	vascular
544	GO_Biological_Process_2023__Positive Regulation Of Epithelial Cell Proliferation (GO:0050679)	-0.247251	-1.82511	0.00115741	0.0454128	1	47/113	24.13%	PTPRN;IGF1;PIK3CD;PTN;BMP2;ZNF703;SOX11;SEMA5A;FGF9;CCL26;NME1;SFRP1;CLDN1;NELL2;WNT7A;CNTN1;NODAL;TNFSF12;FGFR2;BMP4;PLXNB3;WNT5A;NR4A1;CDH3;PAX2;ANG;FGF10;PROX1;C5AR1;PGF;CCL24;PDCL3;TGFA;NELL1;CDH13;HTR2B;JAML;NRARP;EGR3;NME2;FZD7;ECM1;HRAS;VIP;NOTCH2;MYDGF;MDK	vascular
545	GO_Biological_Process_2023__Double-Strand Break Repair Via Homologous Recombination (GO:0000724)	0.181554	1.82503	0	0.096015	1	102/110	71.47%	CDC45;BRCA2;TONSL;RPA4;CDC7;POLN;MCM8;RAD51;NABP1;GINS4;EID3;RECQL5;SWSAP1;ZMYND8;KDM4D;SAMHD1;MCM3;MCM6;PALB2;RAD51B;POLL;SPIDR;MCM9;RAD51D;AP5Z1;INTS3;NPC1;RFWD3;ERCC5;RNF169;RAD52;REV3L;SLF1;RMI1;HELQ;RNF138;SMC5;EXD2;RBBP8;RECQL;MMS22L;INO80;EPC1;WRN;MBTD1;NSMCE2;MRE11;SMC6;FBH1;NIPBL;ATRX;WDR48;SFPQ;PSMD14;ZFYVE26;YY1;SLF2;ERCC4;RPA1;NSMCE4A;TOP3A;NBN;RAD51C;HUS1;RAD21;SWI5;RPA2;SEM1;NSMCE1;…	vascular
546	KEGG_2021_Human__One carbon pool by folate	0.359167	1.82325	0.00931677	0.0957146	1	12/20	25.66%	MTHFD1L;ALDH1L1;MTHFD2;FTCD;ST20-MTHFS;AMT;MTHFS;SHMT1;MTHFR;MTFMT;MTHFD2L;MTR	vascular
547	GO_Biological_Process_2023__Response To Amino Acid Starvation (GO:1990928)	0.258614	1.82138	0.00803213	0.0961514	1	36/41	55.47%	CDKN1A;DAP;MAP3K5;FAS;KPTN;SZT2;SESN2;TFEB;ITFG2;PRKD1;EIF2AK3;NPRL3;SH3GLB1;EIF2AK4;WDR59;SESN1;RRAGB;LARP1;MAPK8;MTOR;MAPK1;EIF2S1;LARS1;PEX2;SEH1L;EIF2AK2;BMT2;MIOS;KICS2;RRAGC;GCN1;DEPDC5;FLCN;MAPK3;WDR24;IMPACT	vascular
548	GO_Biological_Process_2023__Cilium Movement (GO:0003341)	-0.297505	-1.82112	0.00503145	0.0465382	1	36/56	38.01%	CFAP100;CLXN;CFAP73;SPAG17;TTC29;PIERCE1;DNAH11;RSPH4A;DNAI3;CABYR;TEKT1;NME5;CFAP91;ROPN1L;HYDIN;ODAD2;TEKT5;CFAP206;TTLL8;CAMSAP3;DNAH9;SPEF1;ODAD3;PIERCE2;TEKT3;SPEF2;DNAAF1;ODAD4;CCDC63;CCDC39;SPA17;TEKT4;CFAP53;DNAI2;DNAI1;RSPH6A	vascular
549	WikiPathway_2023_Human__Nicotine Effect On Dopaminergic Neurons WP1602	-0.403528	-1.82055	0.00851064	0.0466402	1	16/21	39.02%	GNG2;KCNK3;CDK5;KCNK9;CHRNA4;GNAI1;CHRNB2;DRD4;PPP1R1B;SLC18A2;DDC;TH;CHRNA5;PPP1CA;CHRNA3;DRD3	vascular
550	GO_Biological_Process_2023__DNA Damage Response, Signal Transduction By P53 Class Mediator (GO:0030330)	0.266061	1.81987	0.00395257	0.0964236	1	17/35	25.30%	FOXM1;CHEK2;NDRG1;MUC1;BATF;CDKN1A;BCL3;E2F7;PLK3;PML;SESN2;PIDD1;HIPK2;SP100;MDM2;TP53;CRADD	vascular
551	GO_Molecular_Function_2023__Chloride Channel Activity (GO:0005254)	-0.29317	-1.8122	0.00888325	0.0489869	1	29/60	26.00%	CLCA4;ANO3;GABRA1;GABRA5;GLRA2;SLC17A8;GABRE;CLIC3;GABRG2;SLC17A6;BEST1;FXYD1;SLC17A7;GLRA1;GABRA4;SLC26A9;GLRB;CLCN1;TTYH1;CFTR;GABRB2;GLRA3;GABRA6;GABRG3;GABRB3;CLIC1;CLDN4;GABRB1;GABRG1	vascular
552	GO_Molecular_Function_2023__MHC Protein Binding (GO:0042287)	-0.378538	-1.81207	0.00690608	0.0489328	1	20/26	44.56%	TUBB2A;CD8A;LILRB1;FCRL6;CLEC7A;CD4;MARCHF1;COL2A1;CD74;CD8B;ATP5F1B;LAG3;HLA-E;CD81;LILRB2;TAP1;TAP2;TUBB4B;KIR2DS4;CD244	vascular
553	GO_Biological_Process_2023__Positive Regulation Of Telomere Maintenance Via Telomere Lengthening (GO:1904358)	0.27868	1.80875	0	0.102502	1	31/35	54.90%	RTEL1;PKIB;CTNNB1;PNKP;ATR;POT1;TNIP1;MAPKAPK5;ATM;NEK7;MAP3K4;PARN;HMBOX1;TNKS;DHX36;TNKS2;XRCC5;HNRNPA2B1;CCT4;MAPK1;FBXO4;CCT3;CCT2;CCT8;CCT5;MAP2K7;CCT6A;HNRNPA1;MAPK3;AURKB;PRKCQ	vascular
554	GO_Biological_Process_2023__Regulation Of Histone Modification (GO:0031056)	0.350763	1.80758	0.00906344	0.102464	1	18/18	64.96%	MYOCD;MTHFR;TADA2A;NFYA;MBIP;YEATS2;NFYC;ZZZ3;KAT2B;WDR5;SGF29;KAT14;UBE2N;FLCN;KAT2A;TADA3;NFYB;HPF1	vascular
555	GO_Cellular_Component_2023__Endoplasmic Reticulum Lumen (GO:0005788)	-0.209588	-1.8075	0.00314795	0.0501671	1	127/259	36.20%	VGF;CASQ1;PENK;CHGB;ARSI;COL12A1;COL4A4;COL24A1;COL4A3;MELTF;COL6A3;MXRA8;THBS1;SPP1;COL1A2;COL3A1;COL15A1;COL16A1;CASQ2;COL5A3;COL6A2;P4HA3;HRC;LGALS1;WNT6;ADAMTS5;COL9A1;C3;SDC2;COL6A1;TNC;COL9A2;COL27A1;COL1A1;CES1;ADAMTS7;NOTUM;WNT7A;COL20A1;COL4A5;F10;P3H2;SLC27A2;COL21A1;PDGFD;COL13A1;F7;BMP4;IGFBP5;WNT5A;B2M;MANF;SELENOM;SGCG;ARSJ;TSPO;APOE;COL9A3;LIPC;VCAN;CFP;TIMP1;EVA1A;MEPE;COL23A1;COL…	vascular
556	GO_Biological_Process_2023__Negative Regulation Of Microtubule Depolymerization (GO:0007026)	-0.4164	-1.8072	0.00858369	0.0501723	1	8/20	14.11%	STMN2;FGF13;APC2;TPX2;MID1IP1;BMERB1;CIB1;NAV3	vascular
557	GO_Cellular_Component_2023__Actin-Based Cell Projection (GO:0098858)	-0.266753	-1.80686	0.0034965	0.0500776	1	33/79	23.19%	ANGPT1;SCIMP;USH1C;MYO7A;CD44;ACTN2;ERMN;ACTG2;GPM6A;FGF13;UNC5C;CXADR;DMD;MYO3A;ACTC1;SHTN1;CBLIF;HYAL2;MYO1B;AOC3;PROM1;JAM3;MYO7B;MYO15A;PDGFA;IQGAP2;FSCN1;CD302;ICAM2;ESPN;FSCN3;TWF2;TENM2	vascular
558	GO_Biological_Process_2023__acyl-CoA Metabolic Process (GO:0006637)	0.303252	1.80656	0.00833333	0.102378	1	15/27	28.24%	ACOT2;BAAT;ACOT1;ACSM5;ACOT12;ACSM1;MLYCD;ACSM6;ACSM3;ACOT6;MCEE;ACACB;GPAT4;ACOT9;SUCLG2	vascular
559	GO_Biological_Process_2023__Nitric Oxide Mediated Signal Transduction (GO:0007263)	-0.460167	-1.80561	0.00878477	0.0504504	1	12/15	39.18%	GUCY1B1;GUCY1A1;NOS2;APOE;KCNC2;NDNF;NOS1;FPR1;CD36;DDAH2;NEUROD1;DDAH1	vascular
560	GO_Biological_Process_2023__Regulation Of Cardiac Muscle Contraction (GO:0055117)	-0.348875	-1.80346	0.00923483	0.0511256	1	15/33	17.79%	CHGA;PIK3CG;ATP1B1;CALM3;NPPA;GJA5;CALM1;CALM2;TNNI3K;PLN;ANK2;ZC3H12A;RYR2;SLC8A1;NOS1	vascular
561	GO_Biological_Process_2023__Monoatomic Ion Transport (GO:0006811)	-0.249934	-1.8014	0.00229885	0.0516347	1	58/102	39.40%	TRPA1;SLC24A3;SLC1A6;SLC25A22;SLC1A3;SLC17A8;GRIN1;PKD2L1;SLC8A2;ATP1A4;SLC12A5;SLC17A6;SLC17A7;GLRA1;CHRNA4;SLC26A9;GLRB;P2RX1;TSPO;TRPC6;CHRNB2;SLC24A2;SLC12A7;PIEZO2;TRPM3;CHRNA2;SLC39A1;TMEM63C;SLC25A18;SLC32A1;SLC8A1;SLC8A3;PANX2;SLC24A4;CHRNB4;CHRNA7;SLC12A1;SLC25A10;CHRNB1;GABRB1;HCN4;SLC20A2;AQP11;SLC5A12;CALHM1;SLC4A2;SLC9A4;SLC15A1;SLC1A2;CNGA3;PLP2;SLC9A9;SLC9A3;SLC5A8;SLC9A1;CHRNA3;PA…	vascular
562	GO_Molecular_Function_2023__Cell-Cell Adhesion Mediator Activity (GO:0098632)	-0.32626	-1.80078	0.00645995	0.0517347	1	30/42	44.41%	CNTN4;CNTN2;SIRPA;CNTN1;PLXNB3;CNTN6;DSCAML1;NFASC;JAM3;TRIM29;CNTN5;EMB;S100A11;LRRC4C;NTNG1;NRCAM;EPCAM;IZUMO1;CD200;DSCAM;PKP3;PALLD;PPP1CA;ESAM;BAIAP2;STXBP6;ROBO4;ROBO3;CLSTN3;CDC42EP1	vascular
563	GO_Biological_Process_2023__Regulation Of Microtubule Polymerization Or Depolymerization (GO:0031110)	-0.369124	-1.79879	0.00686813	0.0523258	1	23/27	56.15%	STMN1;STMN4;STMN2;MAPT;SKA3;STMN3;MAP1A;CAMSAP3;ARL2;SKA1;MAP1B;STMND1;MAPRE2;GAS2L1;FKBP4;MAPRE1;MAP2;GAS2L2;MAPRE3;MAP1S;PRUNE1;GBA2;CAMSAP1	vascular
564	GO_Biological_Process_2023__Zinc Ion Transport (GO:0006829)	-0.39749	-1.79828	0.00995733	0.0524389	1	14/22	36.10%	SLC30A10;SLC30A8;SLC30A3;SLC39A1;SLC39A10;SLC39A3;SLC39A4;SLC30A2;SLC30A1;MT3;SLC39A7;SLC39A13;SLC39A14;SLC39A8	vascular
565	GO_Biological_Process_2023__Regulation Of Bone Mineralization (GO:0030500)	-0.293584	-1.79819	0.00900901	0.0523621	1	28/56	29.07%	PTN;BMP2;BMPR1B;ISG15;NOTUM;FZD9;BMPR1A;TFAP2A;BMP4;GREM1;GPM6B;ENPP1;SLC8A1;WNT4;NELL1;FBN2;PKDCC;ECM1;DDR2;TMEM119;TWIST1;PTH;P2RX7;BMP7;SLC20A2;CCL3;KL;ATRAID	vascular
566	GO_Cellular_Component_2023__Basolateral Plasma Membrane (GO:0016323)	-0.229061	-1.79776	0.00224215	0.0524204	1	78/159	32.27%	PTH1R;KCNJ4;SLC19A1;SLC4A11;SLC22A3;SLC6A13;LIN7A;CA4;RHCG;CD44;SLC10A1;SLC51B;ADRA2A;SLCO1C1;TRPC4;PIANP;CLDN1;SLC38A1;CXADR;NDRG4;LPO;BEST1;LRP1;NKD2;FRMPD2;AQP7;GPIHBP1;SLC43A3;ANK3;SLC4A10;SLC46A1;ERBB4;ANK2;SLC22A6;ADCY8;SLC22A9;KCNC2;AQP1;SLC16A7;C5AR1;SLC5A6;ENPP1;SLC16A8;SLC51A;TGFA;SLC7A8;PDZD11;EPCAM;SLC6A9;ERBB3;CDH17;SLC6A6;CA11;TSHR;SLC30A1;PLPP3;SLC29A2;CADM1;SLC16A10;SLC40A1;SLC3A2…	vascular
567	GO_Biological_Process_2023__Regulation Of Sodium Ion Transmembrane Transporter Activity (GO:2000649)	-0.337698	-1.79673	0.00517464	0.0526801	1	21/34	36.49%	FXYD7;SCN2B;SCN4B;FGF13;DMD;WNK2;FXYD1;SCN3B;NETO1;FXYD6;PTPN3;YWHAH;FXYD2;SCN1B;HECW1;HECW2;FGF14;RANGRF;GPD1L;FGF12;WNK3	vascular
568	GO_Molecular_Function_2023__Phospholipase C Activity (GO:0004629)	-0.386223	-1.79406	0.00961538	0.0535645	1	17/23	40.66%	PLCE1;EDNRA;CHRM1;CCL5;NOTUM;PLCH1;F2RL2;PLCB2;PLCL1;CHRM5;CHRM3;PLCH2;CASR;PLCZ1;CCR1;CCR5;PLCB4	vascular
569	GO_Biological_Process_2023__Regulation Of Neuron Apoptotic Process (GO:0043523)	-0.253434	-1.79339	0.00231481	0.053696	1	50/101	33.34%	MAG;CDK5R1;BCL2;SIX1;DKK1;FAIM2;CDK5;AGAP2;NTRK1;PRKCG;FGF20;TOX3;DDIT3;CCL2;FZD9;GRID2;VSTM2L;KCNB1;TRIM2;TFAP2A;UBB;RETREG1;GRM4;APOE;FOXQ1;SOD1;NDNF;FOXB1;BAX;SEMA3E;NFATC4;NTRK2;PARK7;ERBB3;MDK;MT3;EGR1;BDNF;CCL3;SIGMAR1;TGFB3;PTPRZ1;PRNP;PLA2G3;EPHA7;SET;PPT1;CRLF1;CLCF1;NUPR1	vascular
570	GO_Biological_Process_2023__Positive Regulation Of Axonogenesis (GO:0050772)	-0.334677	-1.79218	0.0078329	0.0538138	1	19/37	28.17%	L1CAM;SLITRK1;SEMA4D;MAPT;NTN1;SLIT2;PLXNB3;PLXNA4;ROBO1;SHTN1;ISLR2;PLXNC1;SEMA7A;NTRK2;TWF2;ROBO2;BDNF;PLXNA1;MAP6	vascular
571	GO_Biological_Process_2023__Positive Regulation Of Transcription Initiation By RNA Polymerase II (GO:0060261)	0.225413	1.79097	0	0.10767	1	46/51	62.67%	MED18;MED9;MDC1;TAF8;TBP;TAF1;TP53;TAF3;MED17;TAF4;MED15;MED21;MED28;MED27;MED14;TAF2;MED4;MED13;PSMC6;MED6;MED23;GTF2A1;TAF11;TAF12;PAXIP1;MED12;MED1;MED30;TAF7;TAF5;MED16;MED7;MED10;MED29;SRF;MED22;MED31;MED8;MED26;GTF2A2;HNF1A;TAF6;TAF13;MED11;HNF1B;TAF9	vascular
572	GO_Cellular_Component_2023__Extracellular Membrane-Bounded Organelle (GO:0065010)	-0.295987	-1.78371	0.00864198	0.0567192	1	15/54	7.73%	RAB3A;OLFML3;TUBB2A;ATP1A3;COL12A1;COL6A3;ATP1B1;ATP1A2;COL6A2;PRELP;EDIL3;ATP2B3;GRIA4;GPM6A;OGN	vascular
573	GO_Biological_Process_2023__Positive Regulation Of Canonical Wnt Signaling Pathway (GO:0090263)	-0.263972	-1.78077	0.00350058	0.057542	1	35/83	29.48%	SFRP4;SOX4;DKK2;DAAM2;TMEM198;GPC5;LGR5;SEMA5A;DACT1;PTK7;COL1A1;SFRP1;FZD9;LGR6;FGFR2;WNK2;LYPD6;CDH3;BAMBI;FGF10;PIN1;SFRP2;MRPS12;JUP;NRARP;TMEM9;GPC3;AMER1;SCEL;FRAT1;ATP6AP2;PLEKHA4;PPM1N;LGR4;HHEX	vascular
574	GO_Biological_Process_2023__Stem Cell Differentiation (GO:0048863)	-0.323404	-1.78033	0.00671141	0.0576242	1	16/39	24.12%	PTPRC;EPOP;SP7;SFRP1;GPM6A;WNT7A;FGFR2;FOXO4;KIT;EEF1AKMT4-ECE2;PAX2;MEOX1;HTR2B;EPCAM;SOX21;SHH	vascular
575	GO_Biological_Process_2023__Ubiquitin-Dependent Protein Catabolic Process (GO:0006511)	0.126159	1.77764	0	0.112804	1	273/353	55.10%	RPGR;RNF144B;RNF133;CHMP4C;UBQLNL;GET4;TRIM71;RNF148;NHLRC1;RNF217;USP44;DCST1;NEDD4;ARRDC1;SPSB1;TNFSF13B;TNFAIP3;TRIM32;KIF14;PELI1;KCTD21;RNF122;RNF19A;UHRF1;RNF19B;CHMP6;PML;CHMP4A;ZNRF1;FBXL14;PSMA2;TNFAIP1;AGAP3;MVB12B;FBXL19;PSMA1;HERC5;RNF215;WDR81;PSMA6;RFFL;RNF115;UFD1;UBE3D;SMURF2;UBAP1L;CTNNB1;TRIM25;KLHL20;FBXL7;RNF40;UBR4;VPS37C;TRIM3;CSNK1A1;RNF216;MDM2;CHFR;FBXW4;RNF4;OTUD7B;TAF1;…	vascular
576	GO_Biological_Process_2023__Cell Cycle G2/M Phase Transition (GO:0044839)	0.25621	1.77711	0.00480769	0.112398	1	18/40	22.15%	FOXM1;CHEK2;MELK;CCNA2;CDC25C;TPD52L1;CDK2;CCNY;PLK1;CDC25A;PLK3;KDM8;MASTL;WEE1;DNM2;FBXL7;AKAP8;AKAP8L	vascular
577	GO_Biological_Process_2023__Positive Regulation Of Morphogenesis Of An Epithelium (GO:1905332)	-0.393624	-1.77636	0.00847458	0.0592128	1	14/22	28.76%	ITGAX;PIK3CD;SIX1;NOG;LIF;BMP4;PAX2;SMO;MDK;SOX8;VEGFA;SOX9;WNT5B;SIRT6	vascular
578	WikiPathway_2023_Human__SARS Coronavirus And Innate Immunity WP4912	0.376634	1.77611	0.00321543	0.112257	1	15/16	54.88%	IKBKE;ACE2;IFNAR2;RIGI;IFNAR1;MAVS;TBK1;JAK1;STAT2;IRF3;TRAF3;STAT1;IRF9;TYK2;IFIH1	vascular
579	GO_Biological_Process_2023__Response To Calcium Ion (GO:0051592)	-0.250057	-1.77524	0.00575374	0.0594432	1	43/100	27.74%	SYT4;CRHBP;SYT13;CPNE6;ITPKA;TRPC3;THBS1;CALM3;CASQ2;SYT5;SYT15;PRKAA2;CALM1;NEUROD2;ADCY1;TRPV6;CALM2;SYT1;NLGN1;WNT5A;RYR3;KCNMB1;SYT9;ADCY8;KCNMB2;SYT10;RYR2;CPNE4;CPNE9;KCNMA1;KCNH1;SYT6;RASA4;SYT17;SYT3;PPIF;CPNE7;TTN;SYT2;SYT7;ALOX5AP;TNNT2;CAPN3	vascular
580	WikiPathway_2023_Human__GPCRs Class C Metabotropic Glutamate Pheromone WP501	-0.462773	-1.77523	0.00451128	0.0593312	1	13/15	40.65%	GRM3;GRM8;GPRC5D;GPRC5C;GABBR1;GABBR2;GRM4;GRM5;GRM1;CASR;GRM7;GRM2;GPRC5B	vascular
581	GO_Molecular_Function_2023__Serine-Type Peptidase Activity (GO:0008236)	-0.247135	-1.77476	0.00921659	0.0593745	1	71/101	48.42%	RHBDL1;PLAU;PCSK6;KLK7;GZMH;KLK6;NAALAD2;DPP4;CFD;F12;PCSK1;CNTN1;PCSK5;F10;KLK5;F7;HGF;ADAM8;OVCH2;PRSS12;MMP11;PRSS53;PRSS48;GZMA;SEC11C;HPR;PCSK2;TLL2;PLG;CEL;GZMB;PARL;MMP19;PRSS3;PRTN3;PRSS16;LPA;CTSV;PRSS38;TMPRSS7;HPN;CELA2B;PRSS54;HTRA2;KLK10;HABP2;CD5L;CAPN5;CLPP;RHBDL3;HTRA1;TMPRSS2;CTSH;RHBDL2;PROC;HGFAC;MASP2;ELANE;PRSS56;PRSS36;ENDOU;TMPRSS13;RHBDD3;CELA2A;APEH;GZMK;FURIN;F2;CTRC;MMP…	vascular
582	GO_Biological_Process_2023__Regulation Of Canonical Wnt Signaling Pathway (GO:0060828)	-0.216727	-1.77371	0	0.0595484	1	83/195	33.24%	SFRP4;SNAI2;SOX4;TMEM88;DKK2;SHISA6;DKK1;BMP2;ZNF703;AMER3;DAAM2;TMEM198;GPC5;LGR5;SEMA5A;DACT1;FRZB;BICC1;NOG;DACT3;PTK7;COL1A1;SFRP1;IGFBP2;DDIT3;FZD9;LGR6;FGFR2;IGFBP6;AMER2;WNK2;NKD2;APC2;WNT5A;GREM1;LYPD6;CDK14;CDH3;BAMBI;APOE;FGF10;PIN1;SFRP2;MRPS12;PTPRO;CTNND2;TMEM88B;JUP;SOX7;GLI1;NRARP;DKK3;LRP4;TMEM9;GPC3;SOX17;FZD7;SOX2;AMER1;WNT11;MDK;SCEL;FRAT1;TPBGL;FUZ;ATP6AP2;HECW1;TPBG;GSK3A;SOX…	vascular
583	KEGG_2021_Human__Ubiquitin mediated proteolysis	0.166312	1.77298	0	0.112915	1	111/137	54.50%	SOCS3;AIRE;MID1;DET1;NHLRC1;RHOBTB1;NEDD4;CDC20;TRIM32;BIRC3;PML;UBOX5;PIAS2;CBLB;DDB2;UBE2J1;SMURF2;FANCL;MDM2;HERC2;TRAF6;UBE2J2;PPIL2;SMURF1;WWP1;BIRC2;MGRN1;UBE4B;ANAPC1;ANAPC4;HERC4;UBR5;PIAS1;CUL4A;UBE2H;UBA1;WWP2;PRKN;CDC16;FBXW7;UBE2R2;UBA6;UBE3B;CUL1;UBE2Q2;UBE2E1;COP1;ANAPC5;CDC27;UBE2G1;FBXW11;UBE3C;UBE2Z;HERC1;UBE2D3;UBA3;BIRC6;TRIP12;HUWE1;BTRC;UBE2K;CUL3;UBE3A;CUL5;UBE2G2;XIAP;UBE2D…	vascular
584	KEGG_2021_Human__Pancreatic secretion	-0.257427	-1.77233	0.0046729	0.0598316	1	53/80	46.54%	CCK;CLCA4;ATP1A3;CD38;ATP1B1;ADCY5;ATP1A2;ATP2B3;CPB1;RAB27B;ATP1A4;PRKCG;ADCY1;CPB2;ATP1B2;ATP2B2;BST1;CFTR;ADCY8;PLA2G5;PLCB2;FXYD2;RYR2;CPA2;KCNMA1;ATP2A3;CEL;ADCY7;CA2;PRSS3;ITPR1;CHRM3;RHOA;SLC4A4;PLA2G3;SLC4A2;CELA2B;RAB8A;ADCY3;ATP2A1;ATP2B1;SLC9A1;TPCN2;PLCB4;RAC1;SLC12A2;ADCY6;CELA2A;PRKCB;CLCA2;RAB3D;PLA2G12B;PLCB3	vascular
585	GO_Biological_Process_2023__Intracellular Monoatomic Cation Homeostasis (GO:0030003)	-0.219993	-1.77086	0.00217865	0.0602387	1	83/175	34.24%	TRPA1;CLDN16;SLC30A10;PTH1R;ATP1A3;SLC4A11;HTR2A;EDNRA;EDN3;ATP1B1;SLC24A3;CASQ2;ATP1A2;TMC8;SLC30A8;SLC22A17;SCARA5;CCL5;SLC8A2;ATP1A4;ATP1B2;FTH1;CCDC115;HTR2C;B2M;SLC46A1;PLN;ANK2;CXCL12;ANKRD9;SLC24A2;TMEM203;SOD1;DRD5;ATP13A5;FXYD2;TPT1;SCNN1D;RYR2;SLC8A1;SLC8A3;SLC39A10;KCNMA1;SLC24A4;STOML2;HTR2B;MT2A;CHRNA7;ISCU;ATP2A3;ATP6AP1;DRD4;SLC39A4;TMEM199;SLC30A2;ATP13A4;ATP2C2;FTL;ATP13A1;SLC30A…	vascular
586	GO_Biological_Process_2023__Regulation Of Angiogenesis (GO:0045765)	0.147655	1.7703	0	0.113056	1	50/190	13.86%	IL6;HSPG2;ADAMTS1;ALOX5;CXCL8;GATA6;SERPINE1;HMGA2;NPR1;APLNR;CHI3L1;CEACAM1;ANXA3;CCR3;STAB1;PDE3B;VEGFD;EMILIN2;CXCL13;FLT1;ANGPT4;WARS1;RUNX1;LRG1;CD160;VEGFC;RAPGEF3;NOS3;FGF18;CEMIP2;ANGPTL4;FGF2;SEMA6A;SULF1;PTPRM;PPP1R16B;GHRL;PPARG;TNFAIP3;CD34;DAB2IP;TEK;HYAL1;CDH5;ADM2;PDCD6;PRKD2;EGLN1;TNMD;HMOX1	vascular
587	GO_Biological_Process_2023__Positive Regulation Of T Cell Proliferation (GO:0042102)	-0.288308	-1.7685	0.00736196	0.0611827	1	35/58	35.68%	IGF1;SYK;PTPRC;CD86;CCL5;IGF2;IGFBP2;CD24;TNFSF9;CD28;AIF1;PYCARD;HHLA2;IL1B;IL12RB1;IL18;CD276;CD1D;NCKAP1L;CD6;RPS3;ICOSLG;TNFRSF13C;TNFSF4;HLA-DMB;IL23R;TFRC;LILRB2;FADD;TMIGD2;IL23A;CCR2;CD3E;ZP3;CD40LG	vascular
588	KEGG_2021_Human__Chronic myeloid leukemia	0.194083	1.76845	0.00591716	0.112673	1	57/76	48.91%	PIK3R3;MECOM;E2F3;CDKN2A;RUNX1;CDKN1A;SHC2;E2F2;GADD45B;MYC;E2F1;STAT5A;SHC1;TGFB1;IKBKB;CDK6;DDB2;BCR;TGFBR2;SMAD3;HDAC1;MDM2;SOS1;ABL1;STAT5B;ARAF;MAP2K1;TP53;CTBP2;PIK3CB;BCL2L1;RB1;AKT3;AKT2;NFKB1;PIK3CA;BRAF;SOS2;RAF1;POLK;CRKL;GRB2;MAPK1;SMAD4;CRK;PTPN11;CHUK;HDAC2;KRAS;CBL;TGFBR1;NRAS;MAP2K2;CTBP1;BAK1;PIK3R1;RELA	vascular
589	GO_Cellular_Component_2023__Extracellular Vesicle (GO:1903561)	-0.290857	-1.76816	0.00869565	0.0611984	1	29/56	32.85%	RAB3A;OLFML3;TUBB2A;ATP1A3;COL12A1;COL6A3;ATP1B1;ATP1A2;COL6A2;PRELP;EDIL3;ATP2B3;GRIA4;GPM6A;OGN;APOE;ITGB2;PROM1;CBR1;LFNG;PEG10;ARRDC4;SERPINE2;CTSF;MFGE8;TFRC;EFEMP2;HAS2;CD9	vascular
590	GO_Biological_Process_2023__Positive Regulation Of Cell Population Proliferation (GO:0008284)	-0.189584	-1.7662	0	0.0619457	1	178/434	30.96%	AVPR1A;IGF1;HTR1A;CSF1R;EGR4;LTF;PID1;PDGFRB;PTPRC;EDN3;TBX2;CD86;SOX4;THBS1;BCL2;ITGAX;NTRK3;PDGFRA;PTN;CCN4;BMP2;ZNF703;DPP4;ACTL6B;SOX11;FGF1;S1PR3;ADRA2A;SIX2;CCKBR;FGF9;CLEC7A;SOX15;MEIS1;POU3F3;SIRPG;NME1;CCL5;IGF2;CLEC11A;SFRP1;LIF;FGF20;S1PR2;RPS4X;FZD9;MEGF10;THPO;NODAL;IL34;FGFR2;INSM1;BMPR1A;BIRC5;PDGFD;BICRA;SLC25A5;BMP4;COPS9;S100B;RPS9;MATK;WNT5A;DLL4;GREM1;PAK1;HES5;IRS1;WNT2;AIF1;…	vascular
591	GO_Biological_Process_2023__Regulation Of Early Endosome To Late Endosome Transport (GO:2000641)	0.340707	1.7618	0.00983607	0.115568	1	18/18	65.97%	MSN;MAP2K1;NF2;RDX;DNAJC13;MAPK1;MTMR2;RAB21;PTPN23;VPS11;SNX3;DENND10;MAP2K2;MAPK3;SNX12;EZR;SRC;DAB2	vascular
592	GO_Biological_Process_2023__Collagen Fibril Organization (GO:0030199)	-0.321012	-1.76109	0.0065189	0.06389	1	18/40	20.56%	LUM;COL12A1;COL1A2;COL3A1;COL5A3;LOXL1;COL27A1;COL1A1;LOXL4;CYP1B1;GREM1;PXDN;COLGALT2;COL5A2;ADAMTS2;COL11A1;COL2A1;TLL2	vascular
593	GO_Molecular_Function_2023__Exopeptidase Activity (GO:0008238)	-0.299198	-1.75871	0.00852619	0.0648921	1	26/50	35.20%	ENPEP;NAALAD2;DPP4;MME;CPB1;GGH;CPM;XPNPEP2;ANPEP;FOLH1;TRHDE;CPA2;DPP10;CNDP1;DPP6;CEL;CPE;DPEP2;RCE1;PRSS16;NUDT16;NAALADL1;DPEP1;DPP7;CTSA;CTSZ	vascular
594	GO_Biological_Process_2023__RNA Metabolic Process (GO:0016070)	0.16853	1.75758	0.00833333	0.117583	1	88/106	55.97%	ISG20;ADARB1;RBPMS;RBMS2;DDX39B;BICD1;RBMS1;RBM4;PABPN1;FASTKD1;ALKBH1;IGHMBP2;XRN2;DUSP11;EXOSC10;SNRNP40;DHX8;ATXN2L;AGO4;PABPC4;PNPT1;PAPOLG;AGO1;RBM6;RBFOX2;SETX;FTO;AGO2;RNGTT;NCBP1;DICER1;SUPV3L1;RBM5;MTREX;PAPOLA;THOC1;DHX9;DIS3;ATXN2;TENT2;PARN;AGO3;RBM39;DDX17;HNRNPU;DHX36;HNRNPH1;ATXN1;HNRNPD;HNRNPUL1;PCBP2;HNRNPH3;NOL9;CELF2;EXOSC8;PPP1R8;FASTKD2;ADAR;PRPF4;HNRNPF;DNTTIP2;MPHOSPH10;TP5…	vascular
595	WikiPathway_2023_Human__Neurodegeneration With Brain Iron Accumulation NBIA Subtypes Pathway WP4577	0.239247	1.75714	0.00471698	0.116543	1	38/43	57.63%	CP;DEPTOR;WIPI1;ATG4A;ACACA;ATG7;PIK3R4;PLA2G6;ATG10;RPTOR;ATG12;ATG16L1;TSC1;PRKAA1;DCAF17;MTOR;MECP2;PIK3C3;RB1CC1;WIPI2;ATG3;SPTLC1;RHEB;ATG5;SCP2;PANK2;ATG14;ATG13;BECN1;TSC2;ULK1;GTPBP2;ATP13A2;AKT1S1;WDR45;ATG2A;STK11;COASY	vascular
596	WikiPathway_2023_Human__Vitamin D Receptor Pathway WP2877	0.159831	1.75674	0	0.116112	1	40/149	12.26%	IGFBP3;IL1RL1;STEAP4;ALOX5;CTLA4;THBD;HLA-DRB1;IGFBP1;HILPDA;MX2;CEACAM1;SULT1C2;SLC34A2;CASP5;TRPV5;CBS;BCL6;CDK2;CDKN2A;ABCB1;HLA-DQA2;IL12A;CA9;EPHB4;CDKN1A;NOX1;ABCD1;S100A8;NFATC2;SULT2A1;IRF4;TNFRSF11B;BMP6;MYC;LGALS9;TNFAIP3;PPARD;ADRB2;CYP2D6;BTLA	vascular
597	GO_Biological_Process_2023__RNA Splicing (GO:0008380)	0.174944	1.75656	0	0.115553	1	90/97	70.82%	WT1;DDX47;PPARGC1A;YJU2;MBNL1;ZMAT5;DDX39B;GEMIN2;U2AF1;SRPK1;NOL3;SNRNP48;YJU2B;PRPF3;DHX16;SNRNP40;DHX8;USP39;SF3B3;NRDE2;SMNDC1;SRSF4;DHX15;NCBP1;TRA2B;SRPK2;RSRC1;WBP4;RNPC3;CDK12;PRPF18;LUC7L3;PRPF4B;SCAF11;HNRNPC;SF3B1;PPIG;FUS;SRSF10;SFPQ;SRRM1;TCERG1;PRPF8;TARDBP;SMU1;MAGOH;SF3A3;ZRSR2;HNRNPH3;TXNL4A;PRPF4;MPHOSPH10;RNPS1;PRPF6;CCAR2;PDCD7;SNRPA1;LSM6;SRSF7;SYNCRIP;RRAGC;KHSRP;DDX23;USB1;…	vascular
598	GO_Biological_Process_2023__Cardiac Ventricle Morphogenesis (GO:0003208)	-0.326949	-1.75544	0.00938338	0.0656723	1	23/37	36.58%	MESP1;NPY5R;HEYL;SOX4;MYL3;FGFR2;BMPR1A;BMP4;PKP2;DLL4;SFRP2;PROX1;HEY2;GATA3;CPE;TNNT2;GSK3A;TNNI3;NPY2R;HEY1;TNNC1;MYH7;FKBP1A	vascular
599	GO_Biological_Process_2023__Positive Regulation Of Neurogenesis (GO:0050769)	-0.262769	-1.7529	0.00596659	0.0667587	1	39/73	37.64%	CX3CR1;SERPINF1;MME;SOX11;NEURL1;SLITRK1;HAPLN1;IL1RAPL1;HAPLN2;SLIT2;PLXNB3;PLXNA4;ROBO1;NCAN;VCAN;SMARCD3;CUX2;RGS14;PTPRD;PLXNC1;GPER1;NTRK2;BCAN;ROBO2;SOX8;OPRM1;LRP2;VEGFA;AMIGO1;PLXNA1;MAP6;CX3CL1;HAPLN3;CUL7;PLXNA3;DCT;METRN;TIAM1;IFNG	vascular
600	KEGG_2021_Human__Th17 cell differentiation	0.178581	1.75263	0.00628931	0.116108	1	39/98	23.40%	IL6;IL4R;HLA-DRB1;HLA-DRB5;HLA-DPA1;IL27RA;IFNGR1;JAK3;IL2RG;MAPK13;HLA-DOA;RUNX1;MAPK11;HLA-DQA2;NFATC1;NFKBIE;STAT3;IL6R;NFATC2;IRF4;IL1R1;HLA-DMA;STAT5A;IL2RA;JAK2;TGFB1;IKBKB;IL1RAP;NFKBIB;IL6ST;PPP3CA;MAPK14;TGFBR2;PLCG1;SMAD3;PPP3CC;AHR;STAT5B;STAT6	vascular
601	GO_Biological_Process_2023__Skeletal System Development (GO:0001501)	-0.233626	-1.75013	0.00901917	0.0675417	1	58/126	30.34%	DLL3;IGF1;PTH1R;ADAMTS4;ALX4;COL1A2;CD44;CNMD;BMP2;PRELP;EXTL1;FRZB;NOG;COL9A2;COL27A1;COL1A1;XYLT1;NOTUM;OGN;FGFR2;PCSK5;COL13A1;DLX5;VKORC1;WNT5A;HES5;MMP16;HYAL2;PTGER4;INHA;ITGB8;CMKLR1;RPL13;MEPE;SOX6;PTHLH;FBN1;COL2A1;COL19A1;BMP8B;PKDCC;EVC;HHIP;WNT11;RFLNB;FGFR3;CHRD;PPIB;COL10A1;BMP3;PTH;KIAA1217;SOX9;BMP7;ARSL;GDF10;GDF11;PRDX1	vascular
602	WikiPathway_2023_Human__Genes Related To Primary Cilium Development Based On CRISPR WP4536	0.177111	1.74942	0	0.116802	1	85/99	62.04%	BBS1;EVC2;IFT172;DYNC2I1;TMEM231;KIAA0753;TCTN2;BBS4;CEP76;WDR19;IFT122;TTC23;TUBE1;WDR35;TUBD1;TULP3;CEP43;TCTN3;IFT88;PIBF1;OFD1;IQCE;CEP83;TTBK2;CEP295;IFT43;BBS9;CEP120;TRAPPC11;SCLT1;TTC21B;DYNC2LI1;ARL13B;C2CD3;CEP192;WDPCP;MIB1;CEP104;CPLANE1;CEP44;SASS6;IFT140;TRAF3IP1;TXNDC15;KIFAP3;BBS2;IFT74;IFT57;CLUAP1;IFT27;DYNLT1;IFT52;CILK1;IFT46;CEP162;CBY1;RABL2A;MKS1;TMEM67;KIF3B;DYNC2H1;EFCAB7…	vascular
603	GO_Biological_Process_2023__Modification-Dependent Protein Catabolic Process (GO:0019941)	0.146068	1.74938	0	0.116193	1	158/185	63.27%	RPGR;RNF144B;RNF133;UBQLNL;GET4;RNF148;RNF217;DCST1;NEDD4;ARRDC1;SPSB1;TNFSF13B;TRIM32;KCTD21;RNF19A;UHRF1;RNF19B;FBXL14;HERC5;RNF215;WDR81;RFFL;UFD1;SMURF2;TRIM25;FBXL7;RNF40;UBR4;MDM2;CHFR;FBXW4;TAF1;WDR91;RNF168;RNF213;SMURF1;PSMF1;RNF149;NPLOC4;RNF185;TRPC4AP;UBE4B;CCAR1;FEM1C;HERC4;RNF114;AREL1;NUB1;FBXO22;RNF14;KLHL8;UBE2H;BFAR;UBA1;RLIM;PRKN;ARIH1;FBXO11;UBE2R2;UBA6;FBXL4;UBE3B;HACE1;UBE2E…	vascular
604	GO_Biological_Process_2023__Regulation Of Ryanodine-Sensitive Calcium-Release Channel Activity (GO:0060314)	-0.368913	-1.74628	0.00712251	0.0688598	1	11/24	17.79%	JPH4;CALM3;CASQ2;HRC;FKBP1B;DMD;CALM1;CALM2;JPH3;JSRP1;NOS1	vascular
605	GO_Biological_Process_2023__Cellular Response To Radiation (GO:0071478)	0.24347	1.74329	0	0.118653	1	20/42	24.94%	DEPDC1B;RGR;BRCA2;ECT2;CDKN1A;IFI16;RAD51;TRPM1;RAD9B;FIGNL1;KDM4D;RAD9A;GPR52;SPIDR;MAPK14;TANK;TNKS1BP1;INTS7;BARD1;TP53	vascular
606	GO_Biological_Process_2023__Regulation Of Small GTPase Mediated Signal Transduction (GO:0051056)	0.169201	1.74115	0	0.118742	1	43/116	20.62%	MCF2L;PLEKHG4B;FOXM1;PLEKHG1;ARHGEF28;VAV1;CHN2;ARHGAP4;ARHGAP45;TGM2;ECT2;ARHGEF19;OBSCN;ARHGAP25;ARHGAP18;ARHGAP11B;ARHGAP26;ITGAV;ARHGEF10;CGNL1;RASGRF2;ARHGAP31;ARHGAP20;VAV3;PLEKHG6;ARHGAP23;TRIO;ARHGAP39;PREX1;ARHGEF3;ARHGAP8;GMIP;DNMBP;RHOF;FAM13A;SWAP70;FGD5;FGD1;AKAP13;ARHGEF2;BCR;ARHGAP19;FGD4	vascular
607	GO_Biological_Process_2023__Organic Hydroxy Compound Transport (GO:0015850)	0.237184	1.74109	0.00896861	0.118146	1	13/42	9.79%	ABCC4;ABCC3;ABCC11;SLC16A1;SLC22A2;ABCC2;CEACAM1;SLC10A6;AKR1C1;SLC22A1;SLC29A3;SLCO2B1;GHRL	vascular
608	WikiPathway_2023_Human__Interleukin 1 IL 1 Structural Pathway WP2637	0.232254	1.72659	0.00900901	0.121324	1	31/47	36.24%	MAP3K8;IRAK2;MAPK11;IL1R1;IRAK4;IL1A;MAP2K3;IKBKB;IL1RAP;NFKBIB;RPS6KA5;MAP3K14;MAPK14;MKNK2;TAB1;TANK;MKNK1;TRAF6;MAP2K1;TAB3;MAPKAPK2;MAP3K7;MAPK8;NFKB1;TAB2;SAFB;MAP2K4;ATF2;EIF4E;MAPK1;MAPK9	vascular
609	GO_Molecular_Function_2023__Nuclear Estrogen Receptor Binding (GO:0030331)	0.262486	1.72605	0.0077821	0.121156	1	24/33	39.74%	ZNF366;NKX3-1;DNAAF4;CCDC62;RERG;WIPI1;PAGR1;TACC1;LEF1;NCOA1;CTNNB1;DCAF13;DCAF1;TRIP4;MMS19;NRIP1;NSD1;CNOT1;STRN;NCOA6;LCOR;LATS1;PRMT2;PPID	vascular
610	GO_Molecular_Function_2023__G Protein-Coupled Receptor Binding (GO:0001664)	-0.231977	-1.72545	0.00678733	0.0776477	1	47/119	24.23%	PNOC;CORT;PENK;NDP;WNT16;WNT6;REEP1;NPPA;AGTR1;REEP2;CCL5;SFRP1;S1PR2;GNAZ;WNT7A;WNT10B;INSL3;HSPA1A;RTP5;WNT10A;NPFF;TUB;WNT5A;RNF43;WNT2;BAMBI;GNAO1;STUB1;CXCL12;GNAI1;PDYN;POMC;HSPA1B;PTCH2;HSPA8;WNT3;WNT4;ADM;ARRB1;C1QBP;FPR1;NPW;GNAT2;FZD7;WNT11;S100A14;GPRASP2	vascular
611	KEGG_2021_Human__Viral myocarditis	-0.27836	-1.72361	0.00759494	0.0782862	1	32/56	35.68%	RAC3;CD86;HLA-G;CXADR;DMD;PRF1;SGCA;LAMA2;CYCS;CD28;RAC2;HLA-C;SGCG;LAMA1;HLA-DQB1;ITGB2;HLA-B;CCND1;SGCD;HLA-A;HLA-DRA;ACTG1;ACTB;HLA-DMB;HLA-E;HLA-F;SGCB;HLA-DQA1;HLA-DOB;ITGAL;MYH7;CD40LG	vascular
612	GO_Biological_Process_2023__Protein Monoubiquitination (GO:0006513)	0.223786	1.72333	0.00956938	0.122206	1	44/47	66.73%	RAG1;TNFSF13B;FANCG;RNF220;UHRF1;FANCE;UBE3D;TRIM25;ZC4H2;RAD18;RNF40;FAAP100;FANCL;TRIM56;MGRN1;OBI1;FANCC;PRKN;UBE2R2;MARCHF7;UBE2D3;HUWE1;WAC;RNF10;UBE2O;ITCH;PEX2;RNF20;KLHL12;UBE2W;TRIM41;ZNF598;RNF126;KLHL22;TOPORS;TRIM37;TRIM21;FAAP20;FANCB;KBTBD8;RBX1;PEX12;FANCF;FANCA	vascular
613	WikiPathway_2023_Human__Myometrial Relaxation And Contraction Pathways WP289	-0.217548	-1.71759	0.00794552	0.0809303	1	66/150	30.02%	CRH;GNG3;RGS4;GNG2;ADCY5;CALM3;CNN1;ACTA1;RAMP2;RGS1;GNG8;LPAR1;GNB3;MYLK2;RXFP1;GUCY1A1;IGFBP2;PRKCG;GNGT1;RGS5;CALM1;CAMK2A;ADCY1;IGFBP6;CALM2;RGS20;RGS10;RAMP1;IGFBP5;ACTC1;GNG13;RYR3;CAMK2B;IL1B;JUN;ADCY8;YWHAH;RGS11;FOS;RGS14;RYR2;SLC8A1;NOS1;ADM;PRKCZ;CALD1;ARRB1;ATP2A3;RGS18;LINC02210-CRHR1;GNG11;ADCY7;RGS9;ACTG1;ITPR1;ACTB;OXT;PRKAR1B;RGS7;ATF5;CREB3;PRKAR2B;YWHAB;RGS17;GNB2;CNN2	vascular
614	WikiPathway_2023_Human__Hepatitis C And Hepatocellular Carcinoma WP3646	0.232375	1.71551	0.0045045	0.123675	1	20/46	22.97%	IL6;PTGS2;CXCL8;MYOF;RRM2;CDKN1A;STAT3;IL6R;E2F2;MYC;BIRC3;CASP9;COL4A2;TGFB1;LEF1;CASP7;MAPK14;CASP3;SMAD3;SOS1	vascular
615	MSigDB_Hallmark_2020__Hypoxia	0.147643	1.7154	0	0.123124	1	62/196	18.38%	CP;IGFBP3;IL6;STC1;STC2;LOX;SERPINE1;IGFBP1;FOSL2;CXCR4;IER3;SDC4;B4GALNT2;PYGM;ACKR3;MAFF;CA12;ANXA2;PCK1;F3;TGM2;NDRG1;LXN;CDKN1A;PKLR;EFNA1;ANGPTL4;SLC2A5;COL5A1;NOCT;NDST2;PPARGC1A;SLC2A3;SLC2A1;TNFAIP3;ISG20;TPST2;PDK1;GPC4;ZFP36;TES;ERRFI1;PLAUR;PLIN2;TIPARP;SCARB1;HMOX1;PFKP;EGFR;NFIL3;AK4;EXT1;GCNT2;ERO1A;AKAP12;CASP6;PGM2;GYS1;PFKFB3;PAM;P4HA1;GLRX	vascular
616	WikiPathway_2023_Human__NRF2 Pathway WP2884	-0.227863	-1.71219	0.00344432	0.0828754	1	72/122	41.14%	SLC6A7;SLC6A13;SLC6A1;SOD3;SLC6A17;SLC6A15;SLC5A11;CES1;SLC2A4;FGF13;HSPA1A;FTH1;HGF;SLC2A2;GSTM5;GSTP1;SLC6A11;SLC2A12;HSP90AB1;TXN;SLC39A1;SLC5A6;CES4A;SLC39A10;TGFA;NRG1;SLC5A1;CBR1;SLC39A3;SLC6A9;SLC39A4;HBEGF;SLC5A9;SLC6A6;FTL;CES5A;EGR1;SLC5A3;GSTM1;SLC39A7;SLC5A12;SLC39A13;PRDX1;DNAJB1;SLC39A14;PDGFB;GSTM3;HSP90AA1;GSTA4;SLC6A4;SRXN1;MGST3;EPHA2;SLC2A11;BLVRB;PGD;SLC39A8;GPX3;EPHA3;SLC6A8;…	vascular
617	WikiPathway_2023_Human__Bardet Biedl Syndrome WP5234	0.173044	1.70757	0.00649351	0.126622	1	74/87	61.83%	PKHD1;GLI2;BBS1;EFHC2;GLI3;EVC2;CNGB1;TRIM32;PKD1L1;IFT172;DYNC2I1;BBS4;IQCB1;GPR161;WDR19;CFAP418;IFT122;WDR35;CEP164;SUFU;INVS;LCA5;IFT43;BBS9;SCLT1;SDCCAG8;SCAPER;TTC21B;DYNC2LI1;ARL13B;NPHP3;PKD2;NEK1;WDPCP;USP9X;CEP104;CEP290;BBIP1;OCRL;IFT140;BMAL1;TRAF3IP1;BBS2;IFT74;RP2;IFT57;CLUAP1;EFHC1;IFT27;IFT52;CILK1;PDE6D;NEK8;PKD1;MAK;MKS1;TMEM67;DYNC2H1;CEP41;BBS10;MKKS;FLCN;ARL3;IFT81;BBS7;TMEM2…	vascular
618	GO_Biological_Process_2023__Epithelium Development (GO:0060429)	-0.228824	-1.7064	0.00900901	0.0848082	1	50/115	29.26%	KRT17;SNAI2;TBX2;RHCG;SIX1;BMP2;RCAN3;DACT1;TAGLN;TNC;UPK1B;CES1;KRT19;FGFR2;SOX10;NDRG4;DNPH1;ALDH1A2;KRT10;HES5;WNT2;SOX18;PIH1D1;KRT31;CDK1;SALL1;PAX2;SPINT1;SPINK5;FGF10;PROX1;MEOX1;GRHL2;DHRS9;WNT3;WNT4;SMO;CBR1;SOX17;ALDOC;CDHR2;SHH;SOX8;EHF;LOXL3;FUZ;VEGFA;SOX9;MFSD2A;KANK2	vascular
619	GO_Biological_Process_2023__Response To Lipid (GO:0033993)	0.173752	1.69777	0	0.129018	1	24/102	10.58%	SMAD6;SELE;ACER2;LY96;SLPI;SELP;ALPL;GATA6;TNFRSF11A;NKX3-1;IRAK3;WNT9B;SOCS2;IL12A;F2R;PLCG2;NOS3;STAT3;FGFR4;S100A8;NOCT;GCH1;PPARG;LGALS9	vascular
620	GO_Biological_Process_2023__Protein Polymerization (GO:0051258)	-0.265718	-1.69425	0.00855746	0.0908184	1	20/59	17.54%	CASQ1;CASQ2;TPPP;ARHGAP6;PSTPIP1;GAS7;UBE2S;CATIP;GPX4;MAPT;FGF13;TPPP3;MID1IP1;ANG;PIN1;MAP7D3;CHMP2A;WASF1;TRIM6;KRT5	vascular
621	WikiPathway_2023_Human__Osteoblast Differentiation And Related Diseases WP4787	-0.226978	-1.69045	0.00809249	0.092502	1	41/110	23.72%	DLL3;NOTCH3;PIK3CG;FZD10;FZD2;PIK3CD;BMP2;FGF1;WNT16;WNT6;FGF9;BMPR1B;RUNX2;PRKCG;MAPK10;FZD9;WNT7A;WNT10B;FGFR2;BMPR1A;WNT10A;BMP4;WNT5A;DLL4;WNT2;FGF10;PIK3C2G;PIK3R5;PIK3R6;HEY2;MAPK4;WNT3;WNT4;PRKCZ;SMO;HES6;FZD7;PIK3R2;WNT11;FGF5;NOTCH2	vascular
622	WikiPathway_2023_Human__Joubert Syndrome WP4656	0.192136	1.68949	0.00714286	0.13139	1	65/75	61.94%	B9D2;BBS1;ZNF423;PDE6A;TMEM231;KIAA0586;TCTN2;RAB3IP;BBS4;AHI1;NPHP1;CEP164;SUFU;TCTN3;NPHP4;PIBF1;INVS;OFD1;BBS9;CEP120;CSPP1;ATM;MRE11;ARL13B;MTOR;NPHP3;PCM1;CEP104;NIN;MYO6;CEP290;CPLANE1;RHEB;PCNT;BBS2;RP2;DVL3;PDE6D;NEK8;TMEM138;MKS1;UNC119;TMEM67;CEP41;CCP110;RPGRIP1L;ARL3;KAT5;CEP97;DVL1;ARMC9;BBS7;TMEM216;TMEM237;TTC8;PARP1;INPP5E;ATF4;B9D1;ARR3;TCTN1;PDE6G;BBS5;CC2D2A;FLNA	vascular
623	GO_Biological_Process_2023__Cell-Matrix Adhesion (GO:0007160)	0.172196	1.68529	0	0.132302	1	30/99	14.61%	ADAMTS9;ADAMTS12;ITGA8;ITGA2B;ITGB4;STRC;ITGB7;VCAM1;ITGA2;ITGA6;ITGAD;HPSE;VWA2;ITGA9;ITGB3;THSD1;MADCAM1;SORBS1;OTOA;ITGA5;PARVG;ITGAV;ADAM15;CD34;THBS3;ITGA3;ADAMTS13;CDH11;BCAT2;CD96	vascular
624	KEGG_2021_Human__Phagosome	-0.215311	-1.68035	0.00560538	0.0980936	1	82/140	44.40%	CORO1A;TUBB2A;COLEC12;TUBB4A;THBS2;ATP6V1G2;FCGR3A;THBS1;RILP;MRC2;C3;CLEC7A;ATP6V1F;HLA-G;DYNC1I1;TUBA1A;OLR1;ATP6V0B;ITGAM;CD14;HLA-C;PLA2R1;TUBA8;RAB7B;HLA-DQB1;FCGR1A;TUBA4A;ITGB2;ATP6V0A4;SEC61G;HLA-B;CTSL;NOS1;TUBA1B;HLA-A;CYBA;ATP6AP1;CD36;HLA-DRA;ATP6V0E2;SEC61B;ATP6V0C;ACTG1;ACTB;MSR1;CALR;RAB5C;THBS4;HLA-DMB;HLA-E;LAMP1;MRC1;TFRC;HLA-F;TLR4;TUBB;HLA-DQA1;TLR6;HLA-DOB;FCGR2C;ATP6V0D1;ATP…	vascular
625	GO_Biological_Process_2023__Negative Regulation Of Endothelial Cell Proliferation (GO:0001937)	0.244953	1.66755	0.00865801	0.138126	1	11/34	10.07%	ATOH8;ALOX5;NGFR;FLT1;MMRN2;IL12A;SULF1;PTPRM;SORD;GHRL;PPARG	vascular
626	KEGG_2021_Human__Rap1 signaling pathway	-0.197597	-1.6369	0.00859291	0.120314	1	72/199	24.95%	RAC3;PLCE1;IGF1;CSF1R;ANGPT1;PDGFRB;ADORA2B;THBS1;PIK3CD;ADCY5;CALM3;EFNA3;PDGFRA;FGF1;PFN2;GRIN1;FGF9;LPAR1;MET;RASSF5;CALML4;PRKCG;FGF20;FGFR2;EFNA5;CALM1;ADCY1;CALM2;PARD6A;PDGFD;APBB1IP;KIT;ADORA2A;HGF;ITGAM;LPAR3;RAC2;MAP2K6;GNAO1;ID1;SKAP1;PFN1;CNR1;FYB1;GNAI1;FGF10;ADCY8;CDH1;LPAR4;ITGB2;PARD6G;PLCB2;GRIN2B;RGS14;FGF22;GRIN2A;PGF;PRKCZ;PDGFA;FPR1;RAP1GAP;EFNA2;ADCY7;LPAR5;HRAS;RRAS;PIK3R2;…	vascular
627	MSigDB_Hallmark_2020__Mitotic Spindle	0.136957	1.63499	0	0.149567	1	144/198	50.27%	TOP2A;KIF4A;SYNPO;MID1;NEDD9;ARHGAP4;BRCA2;ECT2;MYO1E;SORBS2;LMNB1;PXN;PLK1;SHROOM1;SHROOM2;GEMIN4;KIF2C;KIF15;TRIO;ARAP3;EPB41;PREX1;KNTC1;ARHGEF3;DOCK4;NCK1;FLNB;FGD6;PLEKHG2;RHOF;TBCD;CNTROB;KPTN;BCAR1;ABR;MARK4;AKAP13;ARHGEF2;BCR;CDC42;TAOK2;CDK5RAP2;FGD4;PDLIM5;CSNK1D;MYO9B;RASAL2;TUBD1;ATG4B;CD2AP;CEP250;SOS1;ABL1;SEPTIN9;ARHGEF7;ARHGAP29;PCGF5;DLG1;OPHN1;CLIP1;ACTN4;STK38L;TUBGCP3;RABGAP1;…	vascular
628	GO_Biological_Process_2023__Positive Regulation Of Cell Differentiation (GO:0045597)	-0.189543	-1.63478	0.00636267	0.121361	1	100/258	29.34%	PCP4;DLX1;IGF1;LTF;HEYL;TP63;EDN3;SOX4;OLFM1;RARRES2;PTN;CCN4;BMP2;ZNF703;ACTL6B;SOX11;ALX1;FRZB;AGTR1;BMPR1B;COL1A1;SP7;SFRP1;RUNX2;ADIRF;RANBP3L;ADRA2B;RBM24;INSM1;BMPR1A;NEUROD2;VWC2;DPF1;BMP4;BEND6;ZNF385A;HGF;LAMA2;ADAM8;LMO3;CRB2;BAMBI;ASCL1;MMD2;LAMA1;NID1;PAX2;IL1B;ZC3H12A;BRINP2;GLIPR2;TGFB1I1;PLA2G5;CMKLR1;GPC1;SMARCD3;SFRP2;CAMK1;NBL1;IL18;HSP90AB1;SOX6;GDF6;NPNT;WNT4;DNAI3;CCN2;RGCC;N…	vascular
629	GO_Biological_Process_2023__Nitrogen Compound Transport (GO:0071705)	0.148324	1.63372	0.00909091	0.149399	1	35/150	11.17%	ABCC4;SLC6A20;SLC7A2;EDN1;RAMP3;SLC26A8;SLC1A5;SLC22A2;SLC52A3;PDPN;SLC26A7;ABCC1;ABCC2;HBA1;SLC19A3;SLC22A4;SLC7A5;SLC22A1;RHAG;AQP8;SLC7A1;SLC29A3;ARRDC3;SLC26A6;ABCD1;CALCRL;ARRDC2;SLC17A1;SLC19A2;SLC17A3;ARRDC1;SLC22A13;SLC26A2;SLC15A2;SLC26A4	vascular
630	GO_Biological_Process_2023__Positive Regulation Of Cell Motility (GO:2000147)	-0.192012	-1.63064	0.00977199	0.123785	1	95/206	34.58%	PLAU;IGF1;CSF1R;SNAI2;PDGFRB;THBS1;ITGAX;PIK3CD;CARMIL2;NTRK3;PDGFRA;BMP2;ZNF703;SEMA3D;FGF1;DAAM2;SEMA3C;DRD1;ADRA2A;SEMA5A;TMSB15A;CLEC7A;CCL26;SEMA4D;CCL5;COL1A1;GPNMB;SEMA3G;CLDN1;CNTN1;LGR6;F10;NTN1;PDGFD;KIT;F7;HGF;PAK1;SEMA6D;AIF1;PHPT1;SEMA5B;CXCL12;CIB1;IL1B;TDGF1;CCL24;SEMA7A;GPER1;CDH13;SEMA3E;PDGFA;MYLK;SMO;EPHA1;PLET1;HBEGF;CXCL16;FAM89B;HRAS;SPRY2;CEMIP;FERMT3;MDK;EPHB2;TWIST1;CLDN4…	vascular
631	GO_Biological_Process_2023__Regulation Of DNA Repair (GO:0006282)	0.147919	1.63025	0	0.149868	1	112/128	65.98%	DEPDC1B;EYA2;NPAS2;CEBPG;EGFR;RUVBL1;PML;BABAM2;SMARCA2;SMCHD1;RUVBL2;PHF10;RAD52;SMARCC1;UBE2V1;BARD1;TAF5L;ATR;ACTR5;RNF168;ARID2;TAF4;ATXN7;SF3B3;UBR5;TRRAP;SMARCE1;KAT7;INO80;EPC1;ARID1B;SMARCA4;MBTD1;UIMC1;EPC2;PARG;EYA3;SIRT1;SUPT20H;ARID1A;DHX9;EP400;TAF2;PPP4R2;TRIP12;PPP4R3B;PBRM1;INO80D;RNF8;YY1;SUPT7L;UCHL5;BRD7;KAT2B;POLH;ACTL6A;USP22;ING3;ERCC6;DEK;SUPT3H;UBE2V2;DPF2;ACTR8;BRD8;ATRIP…	vascular
632	GO_Biological_Process_2023__Cytokine-Mediated Signaling Pathway (GO:0019221)	0.14049	1.62444	0	0.151858	1	52/199	15.04%	IL6;IL18R1;CSF3;IL1RL1;CXCL1;CXCL2;OSMR;IL4R;CXCL8;TNFRSF11A;AIM2;CXCL3;FLT3;GPR35;IL15RA;CEACAM1;IRAK3;IL27RA;FCER1G;JAK3;CSF2RB;IL2RG;CXCL13;EBI3;IL3RA;ADIPOR2;IRAK2;IL12A;LEPR;LRP8;CNTF;STAT3;TRAF1;PLVAP;IL6R;CSF2RA;GHR;CNTFR;IL1R1;TRADD;STAT5A;PTPN6;IL17RA;IL2RA;IL15;CCL8;TRAF3IP2;MFAP3;IL13RA1;BIRC3;IRAK4;LIFR	vascular
633	GO_Biological_Process_2023__Response To Lipopolysaccharide (GO:0032496)	0.156357	1.62411	0.00970874	0.150989	1	33/139	12.41%	IL6;SMAD6;SELE;CXCL1;CXCL2;LY96;SLPI;CXCL8;SELP;SERPINE1;TNFRSF11A;CXCL3;TICAM2;IRAK3;CD80;CXCL13;GBP2;IL12A;F2R;NOS3;NOD2;NLRP7;S100A8;NOCT;PDCD1LG2;GCH1;SBNO2;NUGGC;LGALS9;TNFAIP3;DAB2IP;ZFP36;PELI1	vascular
634	KEGG_2021_Human__Neutrophil extracellular trap formation	0.144704	1.61413	0	0.153693	1	26/143	7.48%	VWF;H2AC15;PIK3R3;H2AC8;H4C4;SELP;ITGA2B;H3C6;H4C2;H2AC11;H2BC18;H2BC14;CR1L;PADI4;H3C10;CASP4;H2BC11;H4C8;TLR2;MAPK13;H2BC5;MAPK11;ITGB3;CLCN5;PLCG2;H2BC15	vascular
635	GO_Molecular_Function_2023__Metal Ion Binding (GO:0046872)	-0.17193	-1.60524	0.00204708	0.136527	1	168/460	27.74%	PCP4;SNCB;SNN;SYT4;CASQ1;SMOC2;TUBB4A;SYT13;CPNE6;FBLN1;POSTN;CLGN;ASPN;CDK5R1;THBS1;CLXN;CALM3;CASQ2;SCIN;GUCA1C;SYT5;TPPP;RCAN3;HRC;CALB1;SYT15;LTBP4;CALB2;GEM;CABCOCO1;GRIN1;MYL9;DNER;PKD2L1;RASGRP1;NME1;CALML4;KCNIP1;CDH6;CD320;PCDHB8;MARK1;CDH7;CPS1;KCNIP3;CLEC3B;FER1L5;MEX3B;TNFAIP6;TESC;CALM1;ITIH1;NUDT8;SLIT2;CDH8;CALM2;LRP1;PRF1;HPCAL4;AOAH;S100B;SYT1;NCS1;PIF1;ADAM8;PRTFDC1;CLEC4E;CDH12…	vascular
636	GO_Biological_Process_2023__Positive Regulation Of Vasculature Development (GO:1904018)	0.16173	1.60168	0.00719424	0.158813	1	27/100	12.59%	CXCL8;GATA6;SERPINE1;HMGA2;APLNR;CHI3L1;ANXA3;CCR3;VEGFD;EMILIN2;FLT1;ANGPT4;RUNX1;LRG1;VEGFC;RAPGEF3;NOS3;FGF18;ANGPTL4;FGF2;CD34;TEK;HYAL1;CDH5;ADM2;PDCD6;PRKD2	vascular
637	KEGG_2021_Human__Amyotrophic lateral sclerosis	-0.176912	-1.57572	0.00723888	0.156098	1	93/334	20.34%	TUBB2A;DNAL4;TUBB4A;NDUFA4L2;COX4I2;NEFL;ATP5MC1;ATP5PO;CHCHD10;BCL2;NDUFA4;ATP5F1D;PFN2;DCTN3;GRIN1;NDUFS5;ATP5MC3;NDUFC2;CYC1;TUBA1A;NEFM;NOS2;UQCRH;NDUFB10;NDUFS7;DDIT3;NDUFB8;COX8A;NDUFB7;NDUFB5;NEFH;NDUFA1;COX5A;SDHD;PSMB6;COX6B1;COX7C;NDUFB11;NDUFA8;RAB39B;COX6A1;COX5B;UQCR10;COX4I1;CYCS;NRG4;COX7A2;NDUFS3;GRIN2C;KIF5C;NDUFA13;PSMD8;NRG3;MAP2K6;UQCRB;COX7B;NDUFB2;ERBB4;TUBA8;PFN1;ANG;UQCRQ;…	vascular
638	GO_Biological_Process_2023__Endoplasmic Reticulum To Golgi Vesicle-Mediated Transport (GO:0006888)	0.157186	1.57081	0	0.175754	1	84/108	51.84%	CTAGE6;SEC16B;TMED3;TMED6;PDCD6;SEC24D;YIPF7;TEX261;VTI1A;MPPE1;BET1;MIA2;SEC24C;WHAMM;TRAPPC12;GOSR2;SEC24A;ZW10;CNIH4;GBF1;TRAPPC11;TMED10;TRAPPC10;COG3;COPB1;TRAPPC9;SEC22A;SEC22C;TRAPPC13;SPAST;ERGIC1;SEC24B;RAB1A;TRAPPC8;VAPA;GOSR1;SCFD1;USO1;TFG;TRIP11;SEC31A;VAPB;CUL3;RAB2A;MIA3;STX17;YIPF4;COPA;ATL2;TMED5;SEC22B;SAR1A;COPB2;TBC1D20;SAR1B;GOPC;ATL3;SEC16A;ERGIC2;NRBP1;TRAPPC6B;KLHL12;ARCN1…	vascular
639	GO_Molecular_Function_2023__Protein Tyrosine Kinase Activity (GO:0004713)	0.154803	1.57081	0	0.175183	1	37/97	22.00%	HIPK4;RET;FLT3;MELK;JAK3;BMX;TXK;FES;FLT1;TEC;FGR;INSRR;FLT4;EPHB4;TTBK1;BTK;MST1R;IGF1R;TIE1;TEK;HIPK3;EPHA4;MERTK;EGFR;TNK2;JAK2;INSR;FGFR1;WEE1;RPS6KA5;HIPK2;YES1;PTK2B;BCR;RIPK2;ABL2;LYN	vascular
640	GO_Biological_Process_2023__Regulation Of Organelle Assembly (GO:1902115)	0.177877	1.56534	0.00613497	0.176185	1	61/73	58.15%	TBC1D2;CEP295NL;USP6NL;TBC1D22A;CYLD;SPICE1;TBC1D8;TBC1D16;CEP76;TBC1D10A;TBC1D12;TBC1D2B;TRAPPC12;MSN;RNF4;IFT88;TBC1D1;CEP295;EVI5;NF2;RABGAP1;SDCCAG8;TBC1D22B;STX18;PDCD6IP;MTMR3;TBC1D15;RDX;DYNC2LI1;RAB5A;SENP6;TBC1D5;WDPCP;PIKFYVE;TSG101;ATG3;TBC1D20;ATG5;IFT140;TBC1D19;CDKL5;RABEP2;STAM;ARHGEF9;TBC1D9B;GSN;TBC1D14;TBC1D13;TBC1D24;VPS11;CENPJ;RAB1B;NPM1;TBC1D10B;INTU;KIF9;STIL;TBC1D10C;EZR;H…	vascular
641	GO_Molecular_Function_2023__Ubiquitin-Protein Transferase Activity (GO:0004842)	0.106721	1.51377	0	0.20714	1	276/367	54.93%	RPGR;RNF144B;SH3RF2;RNF133;MARCHF3;RAG1;TRIM71;RNF148;FBXO24;TRIM60;ASB4;PELI2;TRIM5;TRIM55;NHLRC1;RNF217;DCST1;NEDD4;TRIM22;TNFSF13B;TNFAIP3;LONRF3;TRIM32;LNX2;PELI1;RNF220;RNF122;RNF19A;UHRF1;TRIM50;RNF19B;KLHL21;TRIM73;TRIM39;TRAF3IP2;SH3RF3;BIRC3;TRIM35;ZNRF1;FBXL14;TNFAIP1;PDZRN3;TRIM14;HERC5;RNF215;RFFL;RNF115;CBLB;DDB2;MALT1;UBE2J1;TRIM38;TRIM17;UBE3D;SMURF2;TRAF2;LRSAM1;TRIM25;KLHL20;CDC4…	vascular
642	GO_Biological_Process_2023__DNA Damage Response (GO:0006974)	0.109745	1.44164	0	0.24655	1	332/377	71.47%	DEPDC1B;ACER2;CTLA4;TOP2A;AIM2;NKX3-1;RTEL1;IER3;IKBKE;CHEK2;SIRT4;PCLAF;POLQ;BCL6;RFC3;BATF;CDKN1A;RPA4;BCL3;CGAS;NFATC2;POLD1;NPAS2;RFC4;MCM8;RAD51;MACROD2;NABP1;TNFSF13B;GTF2H4;CHD1L;KMT5C;MYC;PARP4;RAD9B;E2F1;FANCG;EXO1;SLFN11;VAV3;EID3;RECQL5;SFN;SUSD6;PLK3;FOXO1;CASP9;ASF1A;DOT1L;PML;RAD9A;SAMHD1;UVRAG;DDX11;MCL1;BABAM2;POLE2;MASTL;RAD51B;MICA;PIDD1;DDB2;ZBTB40;HELB;SPIDR;MACROD1;TDP1;SMG1;…	vascular
643	GO_Biological_Process_2023__Protein Ubiquitination (GO:0016567)	0.100023	1.34956	0	0.30372	1	304/390	58.70%	DEPDC1B;RPGR;RNF144B;SH3RF2;MARCHF3;RAG1;TRIM71;FBXO24;TRIM60;ASB4;PELI2;TRIM5;BRCA2;TRIM55;DET1;NHLRC1;RNF217;NEDD4;ARRDC1;TRIM22;PLK1;RAD51;SPSB1;CCNF;TNFSF13B;ASB9;FANCG;TRIM32;RNF220;RNF122;RNF19A;UHRF1;FBXL2;TRIM50;RNF19B;KLHL21;TRIM73;TRIM39;SH3RF3;TRIM35;UBOX5;GAN;BABAM2;TNFAIP1;PDZRN3;FANCE;TRIM14;HERC5;RNF115;DDB2;UBE2J1;TRIM38;TRIM17;UBE3D;SMURF2;TRAF2;CTNNB1;LRSAM1;TRIM25;THOP1;ZC4H2;K…	vascular
